# Supplementary material for: Long-read single-cell RNA sequencing analysis of key genes and isoforms during corneal wound healing in cynomolgus monkeys
Source: Research Square preprint supplement (doi:10.21203/rs.3.rs-5232061/v1), 2025-03-05
Supplement: Supplementary file 1 [file 2d46a46ad749097b424750ae.pdf]

## Supplementary Information

### **Long-read single-cell RNA sequencing analysis of key genes and isoforms during corneal wound healing in cynomolgus monkeys**

Hu Chen<sup>1,2,#</sup>, Qi Dai<sup>2,#,\*</sup>, Ming Zhou<sup>1,#</sup>, Yuan-Xia Yang<sup>1</sup>, Zhi-Bo Huang<sup>3</sup>, Shi-Da Chen<sup>1</sup>, Ying-Feng Zheng<sup>1,\*</sup> and Zhuo-Xing Shi<sup>1,\*</sup>

<sup>1</sup> *State Key Laboratory of Ophthalmology, Zhongshan Ophthalmic Center, Sun Yat-sen University, Guangdong Provincial Key Laboratory of Ophthalmology and Visual Science, Guangdong Provincial Clinical Research Center for Ocular Diseases, Guangzhou 510060, China*

<sup>2</sup> *College of Life Science and medicine, Zhejiang Sci-Tech University, Hangzhou 310018, China*

<sup>3</sup> *South-Central Minzu University, Wuhan 430074, China*

# These authors equally contribute to this work.

\* Corresponding author: [daiqi@zstu.edu.cn](mailto:daiqi@zstu.edu.cn) (Q. Dai), [zhyfeng@mail.sysu.edu.cn](mailto:zhyfeng@mail.sysu.edu.cn) (Y.-F Zheng), and [zhuoxing1988@163.com](mailto:zhuoxing1988@163.com) (Z.-X Shi)

## Table of Contents

|                                                                                                                     |    |
|---------------------------------------------------------------------------------------------------------------------|----|
| Supplementary Fig. S1: Quality control and cell annotation. ....                                                    | 1  |
| Supplementary Fig. S2: Feature plot of marker genes. ....                                                           | 2  |
| Supplementary Fig. S3: UMAP Visualization of Batch Effects. ....                                                    | 3  |
| Supplementary Fig. S4: Differentially Expressed Genes. ....                                                         | 4  |
| Supplementary Fig. S5: Cell migration-related genes. ....                                                           | 5  |
| Supplementary Fig. S6: PLAU Sequence and Protein Structure. ....                                                    | 6  |
| Supplementary Fig. S7: Cell proliferation-related genes. ....                                                       | 6  |
| Supplementary Fig. S8: Cell differentiation-related genes. ....                                                     | 7  |
| Supplementary Table 1. Quality control reports for CCS reads from the HIT-scISOseq dataset. ....                    | 9  |
| Supplementary Table 2. Quality control reports for FLNC reads from the HIT-scISOseq dataset. ....                   | 9  |
| Supplementary Table 3. Quality control reports for genome mapping of FLNC reads from the HIT-scISOseq dataset. .... | 10 |
| Supplementary Table 4. Reports on cell barcode and UMI corrections from the HIT-scISOseq dataset. ....              | 11 |
| Supplementary Table 5. The gene and UMI count in HIT-scISOseq dataset. ....                                         | 12 |
| Supplementary Table 6. The isoform and UMI count in HIT-scISOseq dataset. ....                                      | 12 |

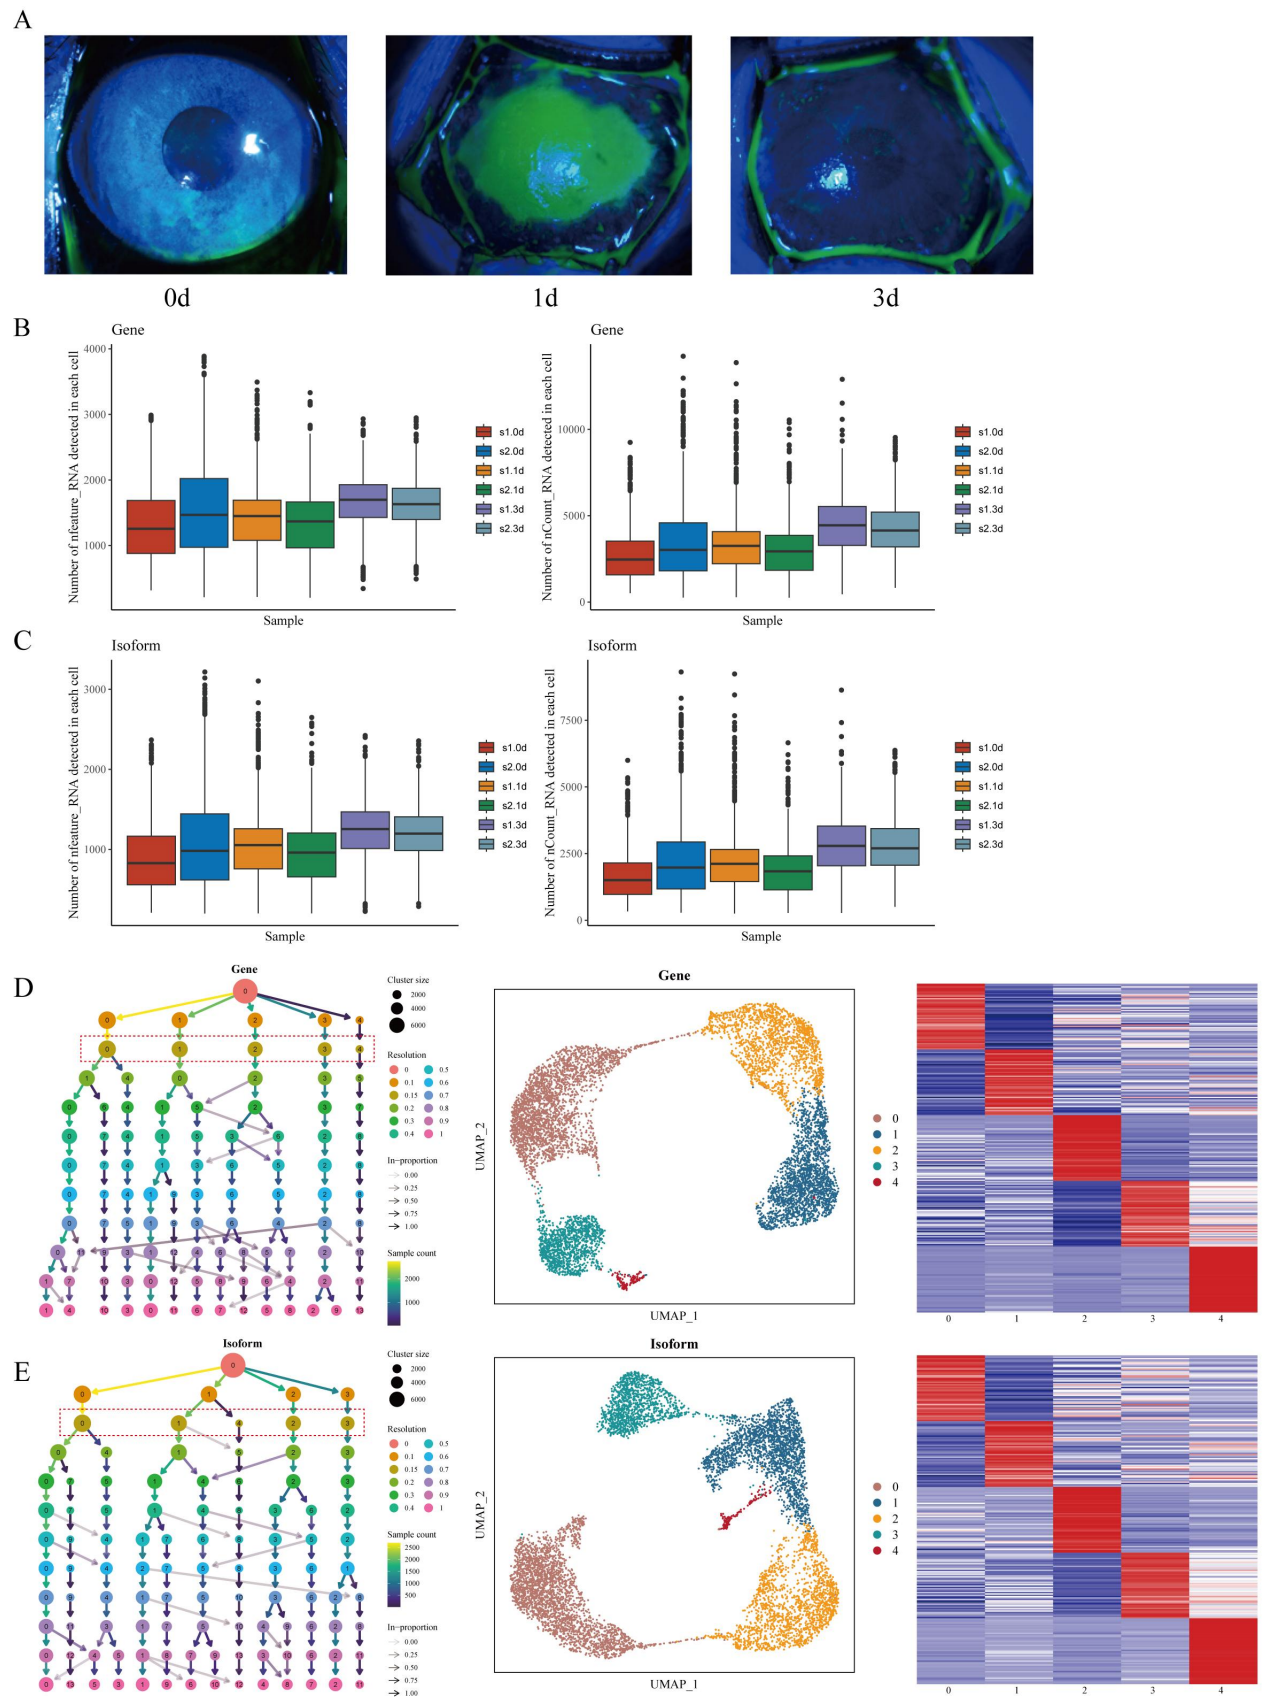

**Supplementary Fig. S1: Quality control and cell annotation. (A).** Corneal wound healing model. **(B-C).** Boxplots showing the distribution of nFeature\_RNA and nCount\_RNA across all cells in each sample, both at the gene (B) and isoform (C)

levels. D-E. At the gene level (D) and isoform level (E), clustering trees (left) show clusterings at different resolutions; UMAP plots (middle) display clustering results; and heatmaps (right) illustrate the expression of the top 50 features in each cluster.

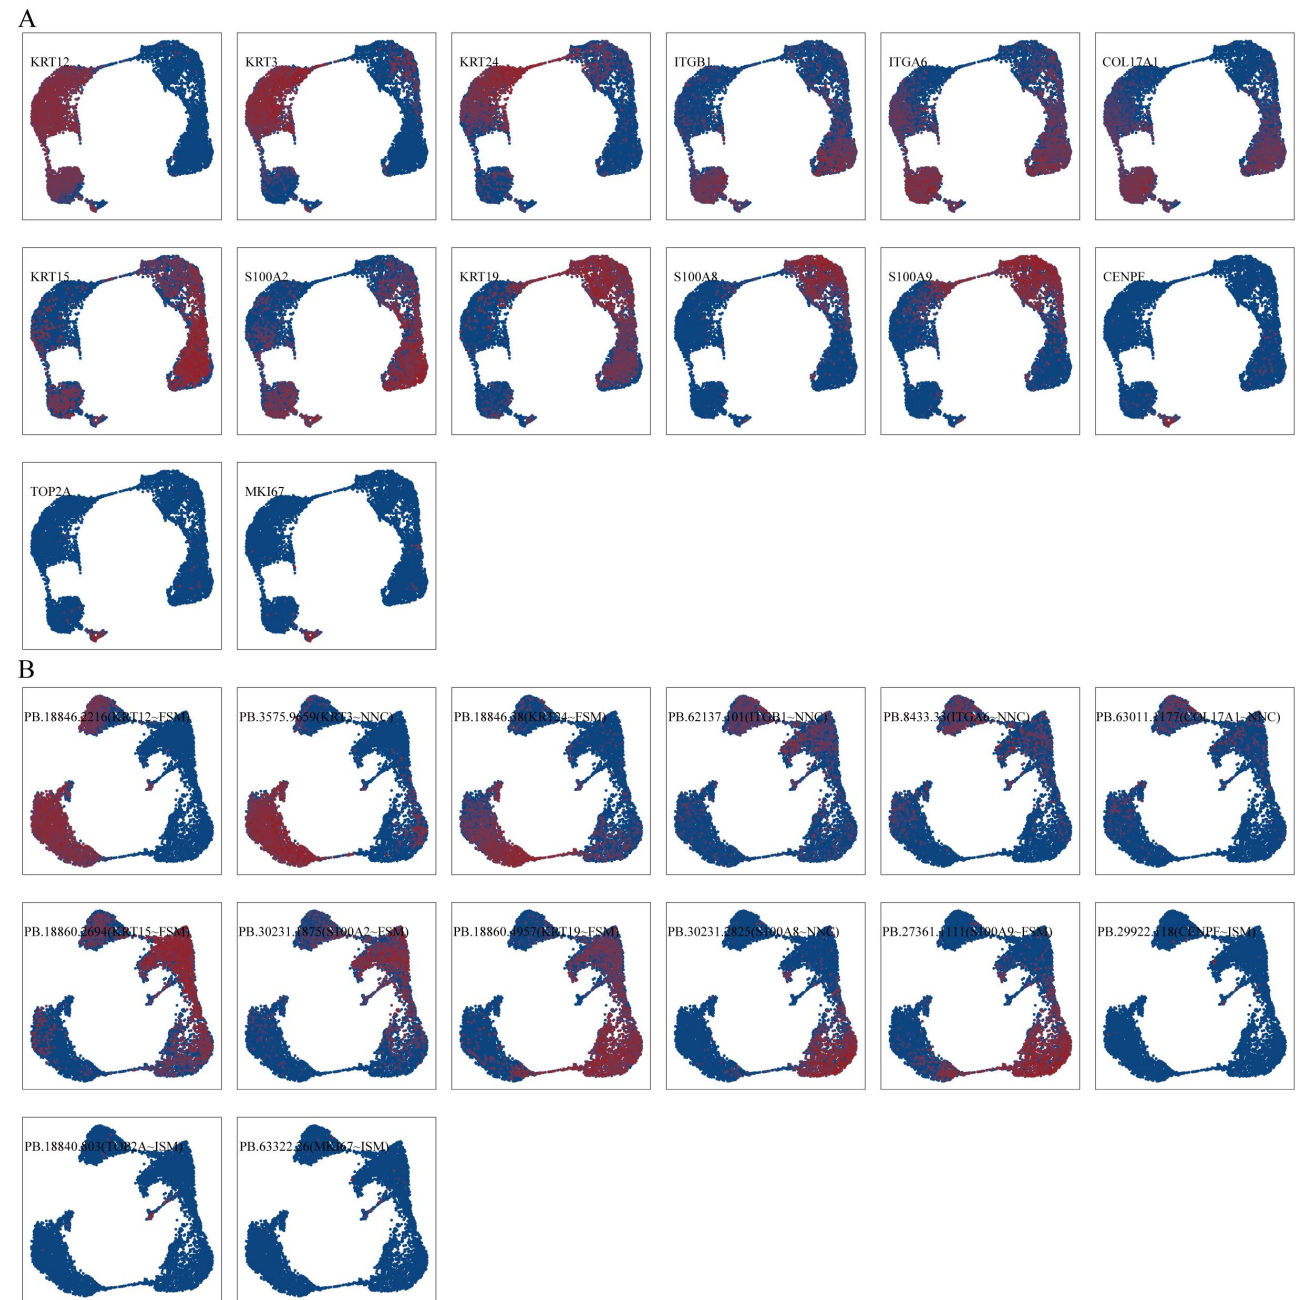

**Supplementary Fig. S2: Feature plot of marker genes. (A-B).** At the gene level (A) and isoform level (B), expression levels of well-known representative cell markers across clusters.

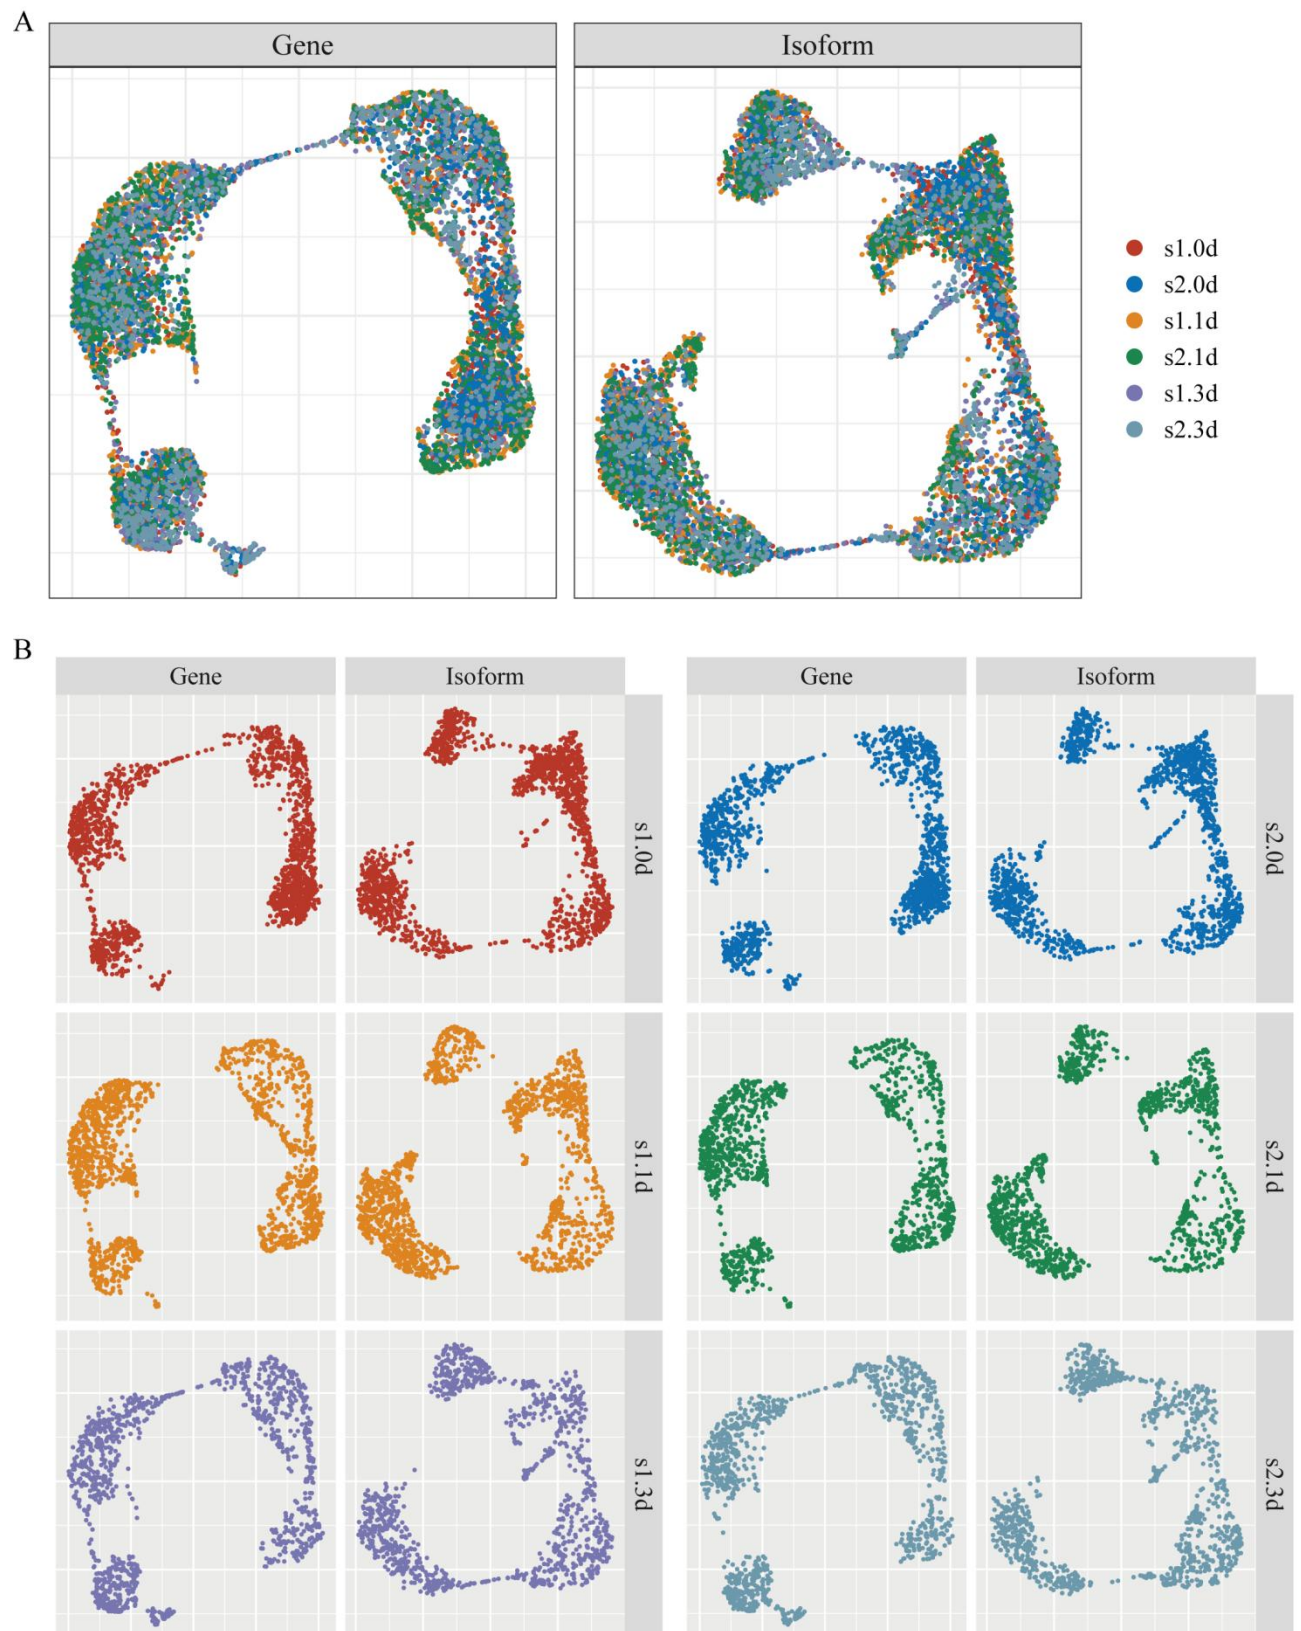

**Supplementary Fig. S3: UMAP Visualization of Batch Effects.** (A-B). UMAP plots showing the distribution of cells from different samples.



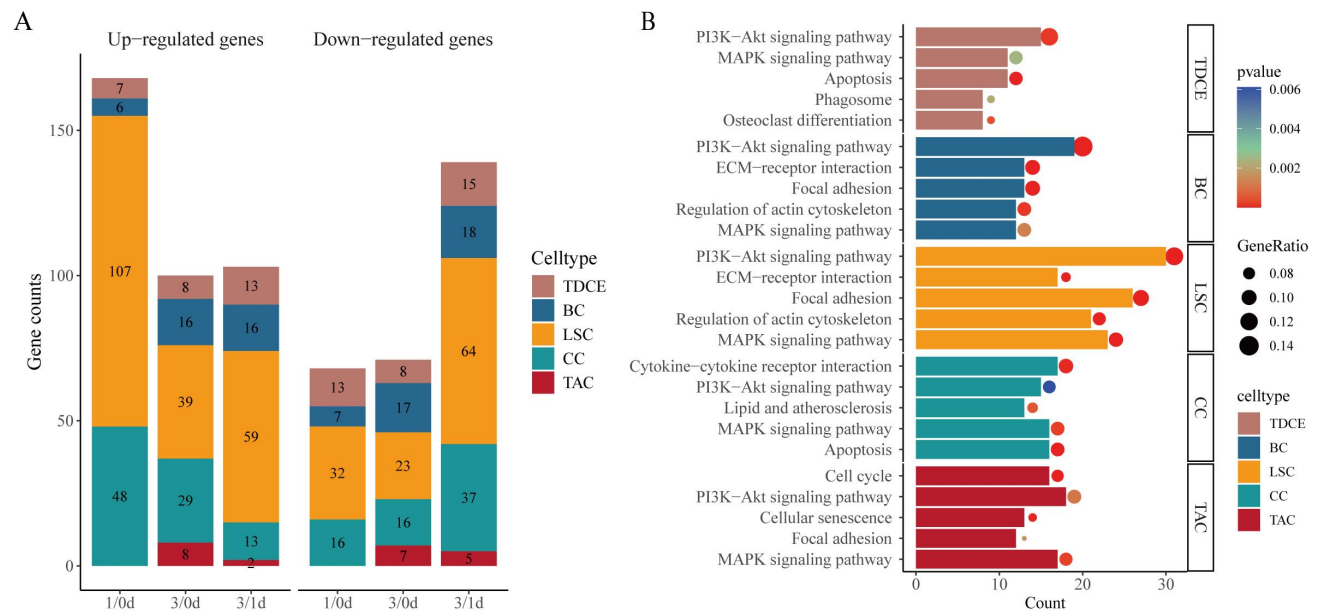

**Supplementary Fig. S4: Differentially Expressed Genes.** (A). Distribution of differentially expressed genes between pairs of time points across different cell types. (B). KEGG pathway enrichment analysis of differentially expressed genes across various cell types.

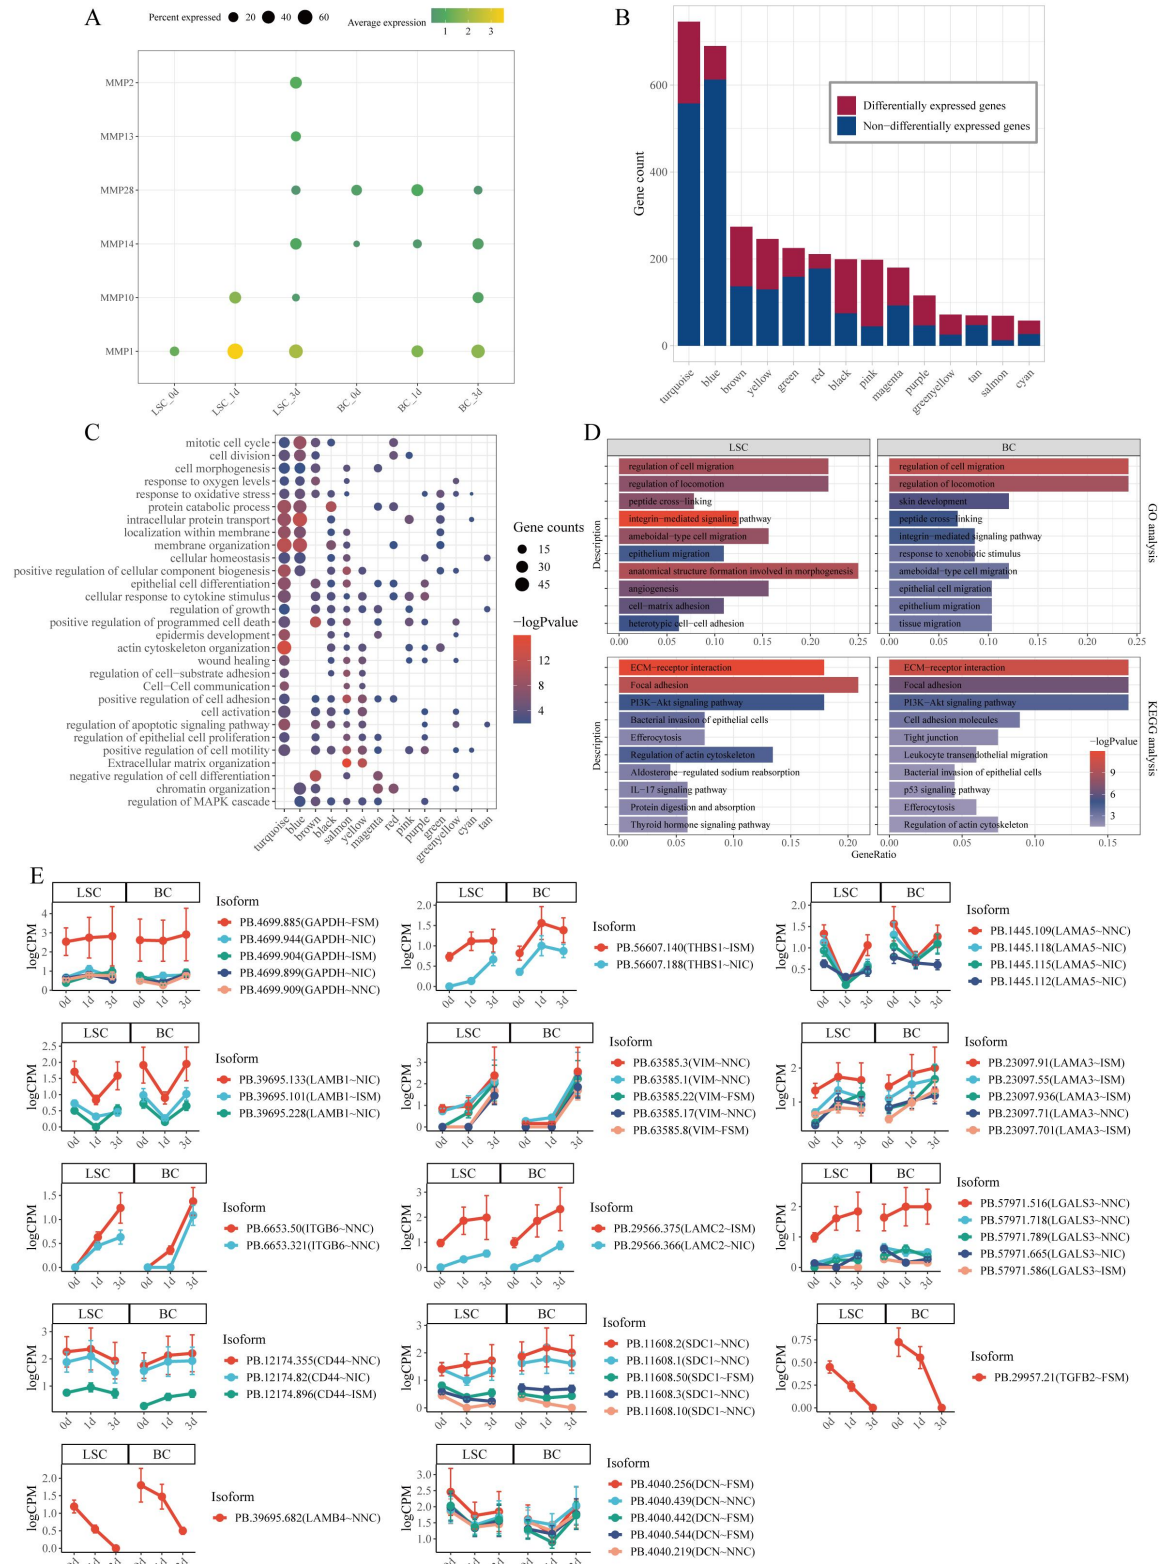

**Supplementary Fig. S5: Cell migration-related genes.** (A). Expression levels of the MMP family at three time points in LSC and BC. (B). Distribution of differentially expressed genes across various gene modules. (C). GO term enrichment analysis of different gene modules. (D). GO term enrichment analysis of functional genes related to cell migration in LSC and BC. (E). Expression trends of corresponding isoforms of cell migration-related genes.

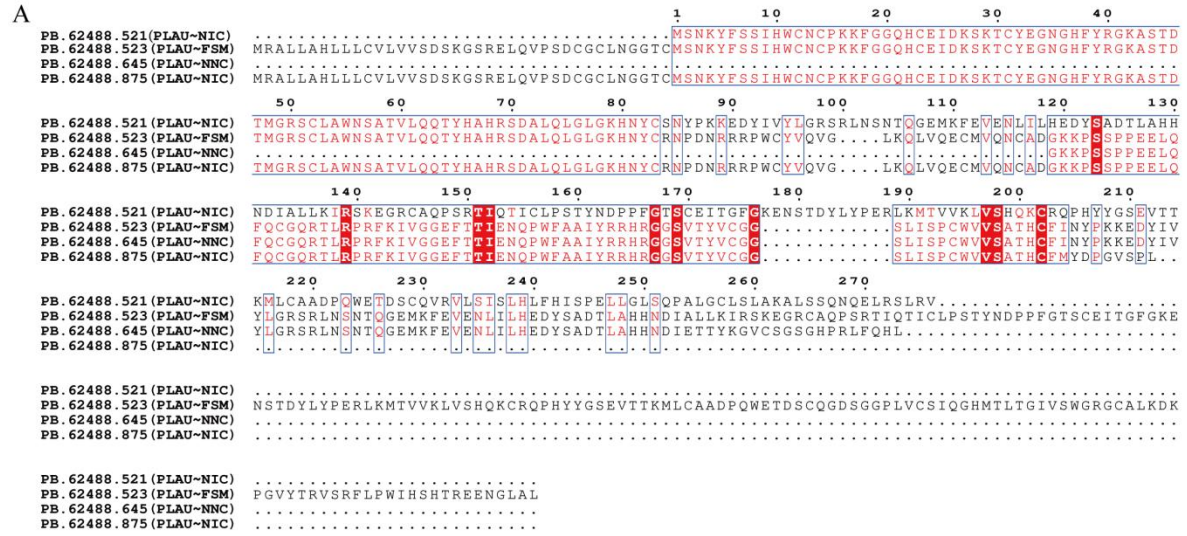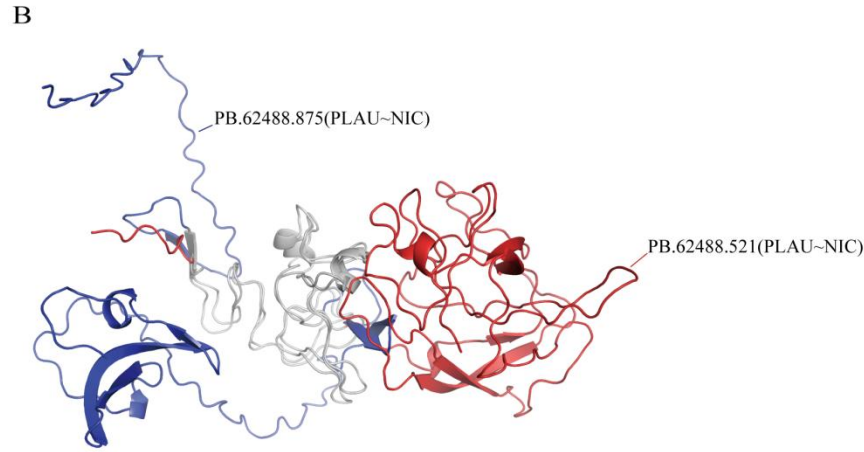

**Supplementary Fig. S6: PLAU Sequence and Protein Structure.** (A). Multiple sequence alignment of the protein sequences corresponding to *PLAU* isoforms. (B). Protein structures of PB.62488.521(*PLAU*~NIC) and PB.62488.875(*PLAU*~NIC).

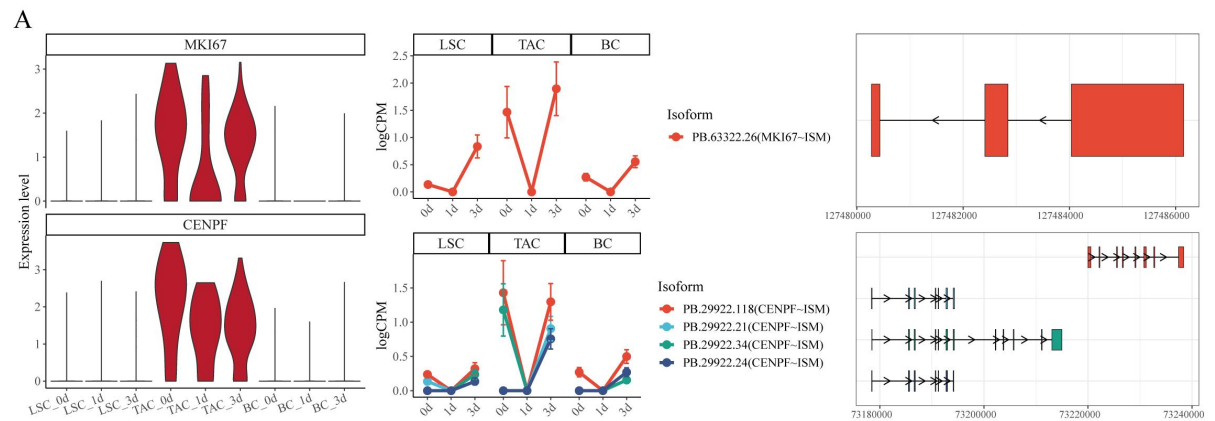

**Supplementary Fig. S7: Cell proliferation-related genes.** MKI67 and CENPF expression violin plots (left), isoform expression trend fold plots (middle), and isoform structure plots (right).



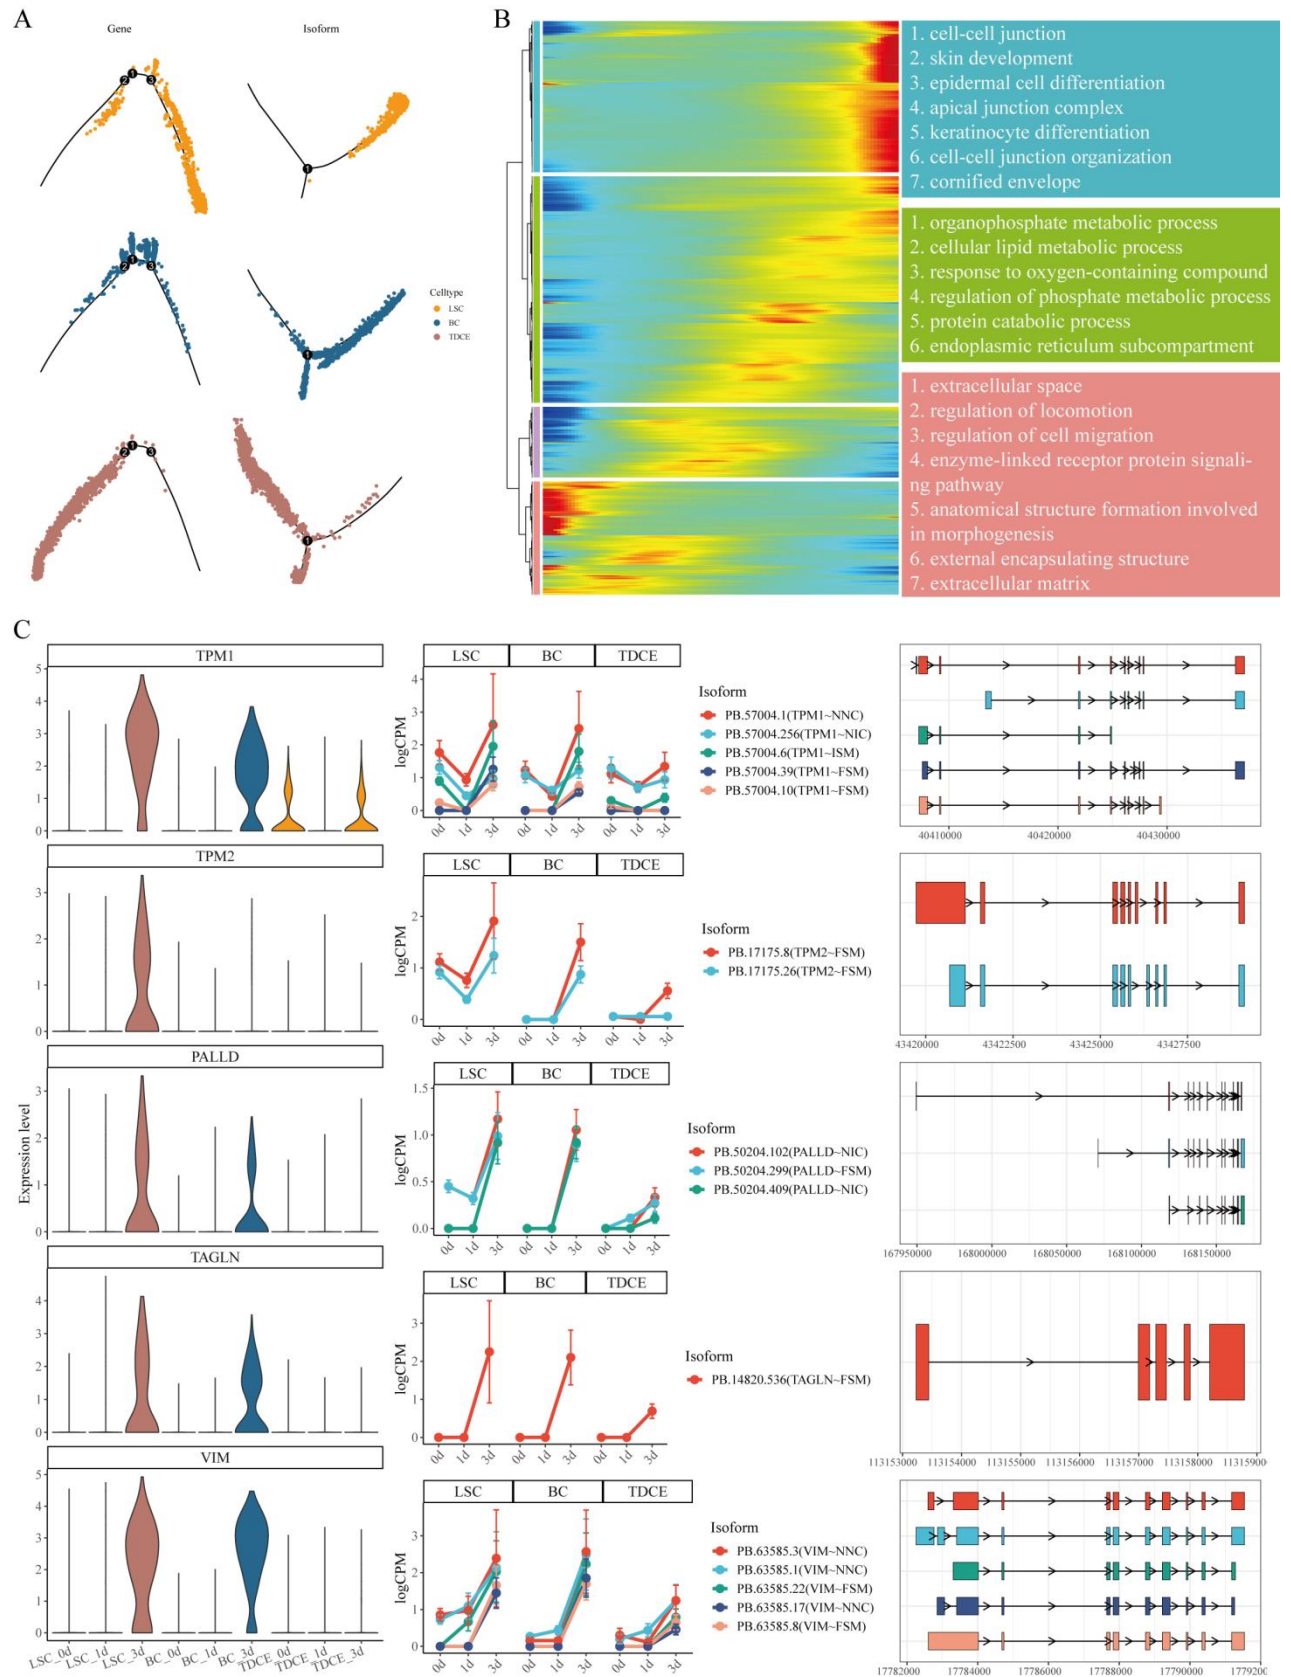

**Supplementary Fig. S8: Cell differentiation-related genes.** (A). Distribution of different cell types along the differentiation trajectory at both gene and isoform levels. (B). At the isoform level, heatmap showing the expression of differentially expressed

genes (vertical columns) sorted by pseudotime (horizontal columns) that may be key genes driving cell differentiation. The right panel displays GO annotation entries for the corresponding clusters. (C). Expression violin plots of cell differentiation-related genes (left), isoform expression trend fold plots (middle), and isoform structure plots (right).

|                 | 0d_s1   | 0d_s2   | 1d_s1   | 1d_s2   | 3d_s1   | 3d_s2   |
|-----------------|---------|---------|---------|---------|---------|---------|
| CCS Reads       | 3427900 | 4226969 | 4609698 | 4389883 | 4684184 | 4190376 |
| CCS Yield (GB)  | 16.75   | 21.62   | 21.08   | 19.01   | 21.3    | 17.74   |
| CCS MaxLen      | 27647   | 27379   | 27073   | 27435   | 28089   | 26896   |
| CCS MeanLen     | 4887.5  | 5114.62 | 4573.57 | 4330.86 | 4546.41 | 4233.92 |
| CCS N50Len      | 5729    | 6065    | 5498    | 5291    | 5502    | 5094    |
| CCS Mean Passes | 23      | 20      | 12      | 13      | 12      | 12      |
| CCS MeanQV      | 0.95    | 0.95    | 0.93    | 0.93    | 0.92    | 0.93    |

**Supplementary Table 1. Quality control reports for CCS reads from the HIT-scISOseq dataset.** CCS Reads : total CCS reads count of each sample; CCS Yield (GB): sum of all CCS reads bases (giga base) in each sample; CCS MaxLen (bp): the max read length of all CCS reads; CCS MeanLen (bp): the mean read length of all CCS reads; CCS N50Len (bp): the N50 read length of all CCS reads; CCS Mean Passes: the mean passes of all CCS reads; Avg. CCS MeanQV: the mean QV of all CCS reads.

|           | 0d_s1    | 0d_s2    | 1d_s1    | 1d_s2    | 3d_s1    | 3d_s2    |
|-----------|----------|----------|----------|----------|----------|----------|
| All Paire | 11637865 | 14837342 | 13994773 | 10819299 | 12889308 | 11974218 |
| FLNC      | 10472456 | 13227218 | 12550076 | 9631647  | 11464563 | 10807930 |
| NFL       | 283104   | 394147   | 389367   | 317775   | 380252   | 318033   |
| Unknow    | 882305   | 1215977  | 1055330  | 869877   | 1044493  | 848255   |
| FLNC(%)   | 89.99    | 89.15    | 89.68    | 89.02    | 88.95    | 90.26    |
| NFL(%)    | 2.43     | 2.66     | 2.78     | 2.94     | 2.95     | 2.66     |
| Unknow(%) | 7.58     | 8.20     | 7.54     | 8.04     | 8.10     | 7.08     |

**Supplementary Table 2. Quality control reports for FLNC reads from the HIT-scISOseq dataset.** All Paire: total linked cDNAs (which is defined as linked cDNA in each CCS reads) count in each sample; FLNC: total full-length non-concatemer (FLNC) reads count in each sample; NFL: total non-full length (NFL) reads count in each sample; Unknow: total artifact cDNA count in each sample; FLNC(%): percentage of FLNC in linked cDNAs of each sample; NFL(%): percentage of NFL in linked cDNAs of each sample; Unknow(%): the percentage of artifact cDNAs in linked cDNAs of each sample.

|                    | 0d_s1    | 0d_s2    | 1d_s1    | 1d_s2   | 3d_s1    | 3d_s2    |
|--------------------|----------|----------|----------|---------|----------|----------|
| Reads Count        | 10472456 | 13227218 | 12550076 | 9631647 | 11464563 | 10807930 |
| Mapped             | 10341384 | 13048692 | 12374890 | 9514271 | 11302113 | 10681176 |
| Mapped(%)          | 98.75    | 98.65    | 98.60    | 98.78   | 98.58    | 98.83    |
| Uniq Mapped        | 9959307  | 12578311 | 12121594 | 9305690 | 11102031 | 10496253 |
| Uniq Mapped(%)     | 95.10    | 95.09    | 96.59    | 96.62   | 96.84    | 97.12    |
| UnMapped           | 131072   | 178526   | 175186   | 117376  | 162450   | 126754   |
| UnMapped(%)        | 1.25     | 1.35     | 1.40     | 1.22    | 1.42     | 1.17     |
| MutilMapped        | 382077   | 470381   | 253296   | 208581  | 200082   | 184923   |
| MutilMapped(%)     | 3.65     | 3.56     | 2.02     | 2.17    | 1.75     | 1.71     |
| MeanMapCoverage(%) | 98.90    | 98.83    | 98.74    | 98.80   | 98.70    | 98.81    |
| MeanMapIdentity(%) | 97.74    | 97.59    | 96.75    | 96.69   | 96.62    | 96.80    |

**Supplementary Table 3. Quality control reports for genome mapping of FLNC reads from the HIT-scISOseq dataset.** Reads Count: Total count of full-length non-concatemer (FLNC) reads for each sample; Mapped: Total count of FLNC reads mapped to the genome for each sample; Mapped(%): Percentage of genome-mapped FLNC reads in each sample; UniqMapped: Total count of unique genome-mapped FLNC reads for each sample; UniqMapped(%): Percentage of unique genome-mapped FLNC reads in each sample; UnMapped: Total count of unmapped FLNC reads for each sample; UnMapped(%): Percentage of unmapped FLNC reads in each sample; MutilMapped: Total count of FLNC reads mapped to multiple locations in the genome for each sample; MutilMapped(%): Percentage of multiple mapped FLNC reads in each sample; MeanMapCoverage(%): Average mapping coverage of uniquely mapped FLNC reads in each sample; MeanMapIdentity(%): Average mapping identity of uniquely mapped FLNC reads in each sample.

|        |                                   | 0d_s1                 | 0d_s2    | 1d_s1    | 1d_s2    | 3d_s1   | 3d_s2    |
|--------|-----------------------------------|-----------------------|----------|----------|----------|---------|----------|
| cellBC | All                               | Total FLNC            | 10472456 | 13227218 | 12550076 | 9631647 | 11464563 |
|        |                                   | CB in Whitelist       | 8823984  | 11051565 | 9739201  | 7436281 | 8736796  |
|        |                                   | CB in Whitelist(%)    | 84.26    | 83.55    | 77.60    | 77.21   | 76.21    |
|        |                                   | CB Correction         | 248384   | 324201   | 492090   | 390769  | 480879   |
|        |                                   | CB Correction(%)      | 2.37     | 2.45     | 3.92     | 4.06    | 4.19     |
|        |                                   | Total Corrected CB    | 9072368  | 11375766 | 10231291 | 7827050 | 9217675  |
|        |                                   | Total Corrected CB(%) | 86.63    | 86.00    | 81.52    | 81.26   | 80.40    |
|        | QV>=0.95(Passed)                  | Total FLNC            | 9375747  | 11729087 | 10194383 | 7831481 | 9222694  |
|        |                                   | CB in Whitelist       | 8648780  | 10820554 | 9363001  | 7150056 | 8396439  |
|        |                                   | CB in Whitelist(%)    | 92.25    | 92.25    | 91.84    | 91.30   | 91.04    |
|        |                                   | CB Correction         | 125123   | 159534   | 211427   | 176266  | 215593   |
|        |                                   | CB Correction(%)      | 1.33     | 1.36     | 2.07     | 2.25    | 2.34     |
|        |                                   | Total Corrected CB    | 8773903  | 10980088 | 9574428  | 7326322 | 8612032  |
|        |                                   | Total Corrected CB(%) | 93.58    | 93.61    | 93.92    | 93.55   | 93.38    |
| UMI    | cellBC Passed<br>&&<br>UMI Passed | Total FLNC            | 8773903  | 10980088 | 9574428  | 7326322 | 8612032  |
|        |                                   | UMI Discarded         | 19011    | 30719    | 29564    | 21077   | 20503    |
|        |                                   | UMI Discarded(%)      | 0.22     | 0.28     | 0.31     | 0.29    | 0.24     |
|        |                                   | UMI Uncorrected       | 8743058  | 10931494 | 9525729  | 7289218 | 8579686  |
|        |                                   | UMI Uncorrected(%)    | 99.65    | 99.56    | 99.49    | 99.49   | 99.62    |
|        |                                   | UMI Corrected         | 11834    | 17875    | 19135    | 16027   | 11843    |
|        |                                   | UMI Corrected(%)      | 0.13     | 0.16     | 0.20     | 0.22    | 0.14     |
|        |                                   | Total Passed UMI      | 8754892  | 10949369 | 9544864  | 7305245 | 8591529  |
|        |                                   | Total Passed UMI(%)   | 99.78    | 99.72    | 99.69    | 99.71   | 99.76    |

**Supplementary Table 4. Reports on cell barcode and UMI corrections from the HIT-scISOseq dataset.** Total FLNC: number of Full-Length Non-Concatemer reads; For cell barcode correction, “All” means CB have no QV filter, “CB QV>=0.95 (passed)” means have QV filter conditions before CB correction. CB in whitelist: cell barcode can be found directly in the 10× Genomics barcode whitelists; CB in whitelist(%): the percentage of “CB in whitelist” in FLNC read count; CB Corrected: cell barcode have 1- Hamming distance with whitelists; CB Corrected(%): the percentage of “Corrected CB” in FLNC read count; Total Corrected CB: sum of the “CB in whitelist” and “Corrected CB”; Total Corrected CB(%): the percentage of “Total number of corrected CB” in FLNC read count; For UMI correction, “CB passed and UMI passed” means have QV filter conditions before UMI correction that CB QV must >=0.95 and have UMI filter conditions after correction that UMI must not “Discarded UMI”; UMI Discarded: means UMI not passed basic quality filtering; UMI Discarded(%): the percentage of “Discarded UMI” in FLNC read count; UMI Uncorrected: means UMI have passed the basic quality filtering but no need correction; UMI Uncorrected(%): the percentage of “Uncorrected UMI” in FLNC read count; UMI Corrected: meet the UMI correction conditions and have correction; UMI Corrected(%): the percentage of “Corrected UMI” in FLNC read count; Total Passed UMI: sum of the “Uncorrected UMI” and “Corrected UMI”; Total Passed UMI(%): the percentage of “Total number of passed UMI” in FLNC read count.



|                       | 0d_s1   | 1d_s1   | 3d_s1   | 0d_s2   | 1d_s2   | 3d_s2   |
|-----------------------|---------|---------|---------|---------|---------|---------|
| Nunber of cell        | 1565    | 1482    | 1096    | 1417    | 1267    | 1068    |
| Mean UMI per cell     | 2703.78 | 3325.31 | 4465.49 | 3393.07 | 2946.68 | 4292.30 |
| Median UMI per cell   | 2462    | 3258    | 4447    | 3023    | 2931    | 4145    |
| Mean genes per cell   | 1320.34 | 1409.17 | 1677.16 | 1544.64 | 1312.69 | 1634.21 |
| Median genes per cell | 1255    | 1451    | 1699    | 1467    | 1368    | 1631.5  |
| Total genes detected  | 13077   | 12603   | 13037   | 13370   | 12185   | 12935   |

**Supplementary Table 5. The gene and UMI count in HIT-scISOseq dataset.** Number of cell: total number of cell in gene matrix; Mean UMI count per cell: mean UMI detection of each cell in gene matrix; Median UMI count per cell: median UMI detection of each cell in gene matrix; Mean gene per cell: mean of gene detection of each cell in gene matrix; Median gene per cell: median of gene detection of each cell in gene matrix; Total detected: sum of gene detection of all cell in gene matrix.

|                          | 0d_s1    | 1d_s1    | 3d_s1    | 0d_s2    | 1d_s2    | 3d_s2    |
|--------------------------|----------|----------|----------|----------|----------|----------|
| Nunber of cell           | 1565     | 1482     | 1096     | 1417     | 1267     | 1068     |
| Mean UMI per cell        | 1655.591 | 2157.602 | 2834.746 | 2189.615 | 1824.537 | 2822.137 |
| Median UMI per cell      | 1502     | 2106.5   | 2795.5   | 1970     | 1800     | 2704.5   |
| Mean isoforms per cell   | 892.1348 | 1030.419 | 1245.797 | 1069.456 | 928.2557 | 1207.896 |
| Median isoforms per cell | 829      | 1054     | 1259.5   | 982      | 947      | 1204.5   |
| Total isoforms detected  | 29379    | 31338    | 29726    | 31780    | 26973    | 28786    |

**Supplementary Table 6. The isoform and UMI count in HIT-scISOseq dataset.** Number of cell: total number of cell in isoform matrix; Mean UMI count per cell: mean UMI detection of each cell in isoform matrix; Median UMI count per cell: median UMI detection of each cell in isoform matrix; Mean isoform per cell: mean type of isoform detection of each cell in isoform matrix; Median isoform per cell: median type of isoform detection of each cell in isoform matrix; Total isoforms detected: sum of isoform type detection of all cell in isoform matrix.
