# Supplementary material for: Long-read single-cell RNA sequencing analysis of key genes and isoforms during corneal wound healing in cynomolgus monkeys
Source: Research Square preprint supplement (doi:10.21203/rs.3.rs-5232061/v1), 2025-03-05
Supplement: Supplementary file 1 [file Supplementary Data10_GO analysis of hdWGCNA module gene.xlsx]

## Sheet: share GO
logP	celltype.stim	GO	description	gene_GO	count	count_normalized
-2.48707	black	GO:0042060	wound healing	ACTG1|CLIC1|HBEGF|HMOX1|SDC4|VPS4B|MACF1	7	-6.13333
0	blue	GO:0042060	wound healing	0	0	-8
0	brown	GO:0042060	wound healing	0	0	-8
0	cyan	GO:0042060	wound healing	0	0	-8
0	green	GO:0042060	wound healing	0	0	-8
-2.341	greenyellow	GO:0042060	wound healing	ANXA5|PDIA3|PLAT|PABPC4	4	-6.93333
0	magenta	GO:0042060	wound healing	0	0	-8
-2.03688	pink	GO:0042060	wound healing	EXT1|B4GALT1|ITGA2|PPARD|VEGFA|MRTFA	6	-6.4
-2.40936	purple	GO:0042060	wound healing	F3|SERPINA1|PLSCR1|PAPSS2|LRG1	5	-6.66667
0	red	GO:0042060	wound healing	0	0	-8
-6.35144	salmon	GO:0042060	wound healing	CD151|FLNA|FN1|NRG1|CCN1|TPM1|WNT7A|AJUBA	8	-5.86667
0	tan	GO:0042060	wound healing	0	0	-8
-5.74209	turquoise	GO:0042060	wound healing	RHOC|CD9|CDKN1A|DGKA|DSP|ERBB3|F2RL1|GPX1|HSPB1|NOTCH2|PPL|RAP2B|CLDN1|MYL12A|GNA13|PDCD10|CHMP2B|CHMP2A|AK3|GRHL3|CHMP4C|JAML	22	-2.13333
-5.08592	yellow	GO:0042060	wound healing	SERPING1|CD44|ITGB1|ITGB6|MYH9|SERPINE2|PPIA|TGFB1|TIMP1|PDPN	10	-5.33333
-3.4078	black	GO:0040008	regulation of growth	BCL2L1|HBEGF|EIF4G1|SFN|RPS6KA3|EZR|SPAG9|MACF1|SERP1|CHD7|DIP2B|DCUN1D5	12	-4.8
0	blue	GO:0040008	regulation of growth	0	0	-8
-3.76471	brown	GO:0040008	regulation of growth	TLE5|APOE|BCL6|FGFR2|FOXC1|IGFBP3|RGS2|CITED2|SEMA3C|CCDC85B|OSGIN1|BCL11A|CHPT1|TSPYL2|RERG	15	-4
0	cyan	GO:0040008	regulation of growth	0	0	-8
0	green	GO:0040008	regulation of growth	0	0	-8
0	greenyellow	GO:0040008	regulation of growth	0	0	-8
-3.77349	magenta	GO:0040008	regulation of growth	ACVR1B|DDR1|CDKN1B|MT1X|SMARCA2|TGFB2|NME6|LPAR3|FOXP1|ING4|SEMA4A|JADE1	12	-4.8
-2.08461	pink	GO:0040008	regulation of growth	DUSP6|MT3|PPARD|VEGFA|YBX3|ZPR1|SEMA4B|RUFY3|CXCL16	9	-5.6
0	purple	GO:0040008	regulation of growth	0	0	-8
0	red	GO:0040008	regulation of growth	0	0	-8
-3.41762	salmon	GO:0040008	regulation of growth	APP|FN1|IGFBP7|SMAD7|SFRP1|BASP1|AGRN	7	-6.13333
-2.6189	tan	GO:0040008	regulation of growth	ENO1|G6PD|SPOCK1|TKT|WNT3|DUSP10	6	-6.4
-2.08602	turquoise	GO:0040008	regulation of growth	BTG1|CDH1|CDKN1A|CISH|GOLGA4|GSK3B|JARID2|PIM1|PPP2CA|RB1|SLC9A1|MKKS|ADAM15|IST1|RASGRP2|CIB1|AGR2|NEDD4L|CDKN2AIP|SESN2|ITCH|MTPN|TTL	23	-1.86667
-2.75589	yellow	GO:0040008	regulation of growth	ALOX15B|BST2|RUNX1|IGFBP5|KRT17|SERPINE2|SGK1|TGFB1|LTBP4|RACK1	10	-5.33333
0	black	GO:0050678	regulation of epithelial cell proliferation	0	0	-8
0	blue	GO:0050678	regulation of epithelial cell proliferation	0	0	-8
-3.26938	brown	GO:0050678	regulation of epithelial cell proliferation	APOE|FGFR1|FGFR2|HMGB1|NR4A1|PTPRK|NR2F2|TP63|NUPR1|ZNF703|OSR2	11	-5.06667
0	cyan	GO:0050678	regulation of epithelial cell proliferation	0	0	-8
0	green	GO:0050678	regulation of epithelial cell proliferation	0	0	-8
0	greenyellow	GO:0050678	regulation of epithelial cell proliferation	0	0	-8
-2.70701	magenta	GO:0050678	regulation of epithelial cell proliferation	CDKN1B|HMGB2|HES1|LAMA5|LAMB1|PAX6|TGFB2|OVOL2	8	-5.86667
0	pink	GO:0050678	regulation of epithelial cell proliferation	0	0	-8
-2.65384	purple	GO:0050678	regulation of epithelial cell proliferation	F3|KRT4|MTSS1|TINF2|EAF2|LRG1	6	-6.4
0	red	GO:0050678	regulation of epithelial cell proliferation	0	0	-8
-5.54129	salmon	GO:0050678	regulation of epithelial cell proliferation	CAV1|CAV2|PTN|SFRP1|SPARC|WNT7A|MAGED1|SULF2	8	-5.86667
0	tan	GO:0050678	regulation of epithelial cell proliferation	0	0	-8
-3.62968	turquoise	GO:0050678	regulation of epithelial cell proliferation	CCND1|CDKN2B|GPX1|HRAS|IRF6|TACSTD2|NOTCH2|RB1|STAT1|TCF7L2|THBS1|CLDN1|AIMP1|PDCD10|SLURP1|ESRP2|MARVELD3|ATP5IF1|JAML|CD109|EPGN	21	-2.4
-3.46151	yellow	GO:0050678	regulation of epithelial cell proliferation	B2M|CDK4|EGR3|SNAI2|TGFB1|RGCC|EGFL7|IFT57|MYDGF	9	-5.6
-2.64505	black	GO:0010810	regulation of cell-substrate adhesion	ACTG1|ACTN4|RREB1|SDC4|MACF1|PHLDB2	6	-6.4
0	blue	GO:0010810	regulation of cell-substrate adhesion	0	0	-8
0	brown	GO:0010810	regulation of cell-substrate adhesion	0	0	-8
0	cyan	GO:0010810	regulation of cell-substrate adhesion	0	0	-8
0	green	GO:0010810	regulation of cell-substrate adhesion	0	0	-8
0	greenyellow	GO:0010810	regulation of cell-substrate adhesion	0	0	-8
0	magenta	GO:0010810	regulation of cell-substrate adhesion	0	0	-8
0	pink	GO:0010810	regulation of cell-substrate adhesion	0	0	-8
0	purple	GO:0010810	regulation of cell-substrate adhesion	0	0	-8
0	red	GO:0010810	regulation of cell-substrate adhesion	0	0	-8
-7.56589	salmon	GO:0010810	regulation of cell-substrate adhesion	COL16A1|FLNA|FN1|CCN1|ITGA6|VIT|SFRP1|FERMT1	8	-5.86667
0	tan	GO:0010810	regulation of cell-substrate adhesion	0	0	-8
-4.59071	turquoise	GO:0010810	regulation of cell-substrate adhesion	DUSP3|EMP2|GSK3B|JUP|TACSTD2|RAC1|SLC9A1|THBS1|ADAM15|SLK|CIB1|AGR2|CORO1C|MINK1|RIN2|EPB41L5	16	-3.73333
-3.7375	yellow	GO:0010810	regulation of cell-substrate adhesion	CALR|ITGA3|P4HB|SERPINE1|RRAS|PDPN|FERMT2	7	-6.13333
-4.48015	black	GO:2001233	regulation of apoptotic signaling pathway	SLC25A5|BAK1|BCL2L1|CTSL|HMOX1|PTPN1|RELA|PEA15|BCL10|PSME3|PRELID1	11	-5.06667
0	blue	GO:2001233	regulation of apoptotic signaling pathway	0	0	-8
-5.97374	brown	GO:2001233	regulation of apoptotic signaling pathway	DDIT3|FGFR1|GNAI2|GRINA|NFE2L2|NR4A2|TIMP3|TP63|TNFSF10|IER3|BCLAF1|BCAP31|NUPR1|G0S2|PHIP	15	-4
0	cyan	GO:2001233	regulation of apoptotic signaling pathway	0	0	-8
0	green	GO:2001233	regulation of apoptotic signaling pathway	0	0	-8
-4.68069	greenyellow	GO:2001233	regulation of apoptotic signaling pathway	PDIA3|LMNA|LTBR|PTPN2|SOD2|BCL2L11|HYOU1	7	-6.13333
0	magenta	GO:2001233	regulation of apoptotic signaling pathway	0	0	-8
0	pink	GO:2001233	regulation of apoptotic signaling pathway	0	0	-8
-2.00174	purple	GO:2001233	regulation of apoptotic signaling pathway	ICAM1|MUC1|S100A8|S100A9|TMBIM6	5	-6.66667
0	red	GO:2001233	regulation of apoptotic signaling pathway	0	0	-8
-4.59228	salmon	GO:2001233	regulation of apoptotic signaling pathway	CAV1|CLU|ITGA6|ITGAV|SFRP1|MAGED1|IVNS1ABP	7	-6.13333
-2.72397	tan	GO:2001233	regulation of apoptotic signaling pathway	ENO1|RB1CC1|FAF1|GHITM|UNC5B	5	-6.66667
-7.83124	turquoise	GO:2001233	regulation of apoptotic signaling pathway	BOK|PTTG1IP|CD74|CTSC|CTNNA1|GPX1|GSK3B|HSPB1|LGALS3|MAL|MCL1|MDM2|NCK1|PSEN1|PTGS2|RB1|TCF7L2|THBS1|UBB|VDAC2|NCK2|FADD|NHERF1|PPIF|ACAA2|SERINC3|IL20RA|TMBIM1|RFFL	29	-0.266667
-4.24393	yellow	GO:2001233	regulation of apoptotic signaling pathway	SLC25A6|CD44|GSTP1|P4HB|SERPINE1|PPIA|RPS3|RPS7|SNAI2|RACK1	10	-5.33333
-3.17684	black	GO:0043068	positive regulation of programmed cell death	ANXA1|BAK1|CAPN2|CTSL|HMOX1|PHLDA2|PEA15|TNFRSF10A|BCL10|STK17A|PRELID1	11	-5.06667
0	blue	GO:0043068	positive regulation of programmed cell death	0	0	-8
-11.1253	brown	GO:0043068	positive regulation of programmed cell death	TLE5|APC|RHOB|BCL6|TSPO|DDIT3|NR3C1|HMGB1|NR4A1|ID3|IGFBP3|GADD45B|SOX4|TIMP3|TP63|TNFSF10|TSC22D1|BCLAF1|BCAP31|TXNIP|GADD45G|TNFAIP8|NUPR1|G0S2|MAP3K20	25	-1.33333
0	cyan	GO:0043068	positive regulation of programmed cell death	0	0	-8
0	green	GO:0043068	positive regulation of programmed cell death	0	0	-8
-4.62041	greenyellow	GO:0043068	positive regulation of programmed cell death	ATP2A2|PDIA3|HSPD1|LTBR|PTPN2|SOD2|BCL2L11|NET1	8	-5.86667
-2.38074	magenta	GO:0043068	positive regulation of programmed cell death	ATF3|BMP7|CASP6|RARB|TGFB2|CRADD|FOXP1|PDCD4|ING4	9	-5.6
-4.71838	pink	GO:0043068	positive regulation of programmed cell death	ATF4|BID|C1QBP|DUSP6|EIF2S1|B4GALT1|SFPQ|TNFRSF1A|FOSL1|TNFRSF10B|PDCD5|UTP11|PTRH2	13	-4.53333
-2.59935	purple	GO:0043068	positive regulation of programmed cell death	ADM|ALDH1A3|GBP1|LYN|S100A8|S100A9|ZC3H12A	7	-6.13333
0	red	GO:0043068	positive regulation of programmed cell death	0	0	-8
-6.4256	salmon	GO:0043068	positive regulation of programmed cell death	BNIP3|CAV1|CLU|CYP1B1|CCN1|ITGA6|HTRA1|SFRP1|TGM2|MAGED1	10	-5.33333
0	tan	GO:0043068	positive regulation of programmed cell death	0	0	-8
-4.3579	turquoise	GO:0043068	positive regulation of programmed cell death	BOK|BTG1|CDKN1A|CTSC|CTNNA1|F2RL1|MAL|MCL1|NCK1|NOTCH2|PSEN1|PTGS2|RARG|SLC9A1|THBS1|UBB|NCK2|AKR1C3|RIPK2|FADD|NHERF1|SERINC3|MTCH1|IL20RA|TIGAR|CLEC7A|PLEKHN1|SCIN	28	-0.533333
0	yellow	GO:0043068	positive regulation of programmed cell death	0	0	-8
-4.10303	black	GO:2000147	positive regulation of cell motility	ACTG1|ACTN4|ANXA1|HBEGF|EPHA2|HMOX1|PTAFR|RREB1|PTP4A1|SPAG9|RRAS2|SELENOK|MCU	13	-4.53333
0	blue	GO:2000147	positive regulation of cell motility	0	0	-8
-3.88848	brown	GO:2000147	positive regulation of cell motility	APC|RHOB|ASCL2|DOCK1|FGFR1|GNAI2|HMGB1|NFE2L2|PIK3R1|MAP2K2|SPRY2|SEMA3C|PLK2|SYNE2|ZNF703	15	-4
-2.35602	cyan	GO:2000147	positive regulation of cell motility	ABL2|PLAU|CXCL12|SPHK1	4	-6.93333
0	green	GO:2000147	positive regulation of cell motility	0	0	-8
-2.0585	greenyellow	GO:2000147	positive regulation of cell motility	ARHGAP5|MET|SDCBP|SOD2|FAM110C	5	-6.66667
-2.20447	magenta	GO:2000147	positive regulation of cell motility	ACVR1B|BMP7|GAS6|LAMB1|KITLG|PAX6|TGFB2|FOXP1|SEMA4A	9	-5.6
-3.21623	pink	GO:2000147	positive regulation of cell motility	C1QBP|HSPA5|ITGA2|PFN1|VEGFA|ARHGEF2|MAP4K4|SEMA4B|RUFY3|CXCL16|NUS1	11	-5.06667
-5.35965	purple	GO:2000147	positive regulation of cell motility	CLDN3|DEFB1|F3|ICAM1|LYN|GFUS|ADAMTS1|STK39|DUOX2|ZC3H12A|CXCL17	11	-5.06667
0	red	GO:2000147	positive regulation of cell motility	0	0	-8
-9.30583	salmon	GO:2000147	positive regulation of cell motility	APP|CAV1|CD151|CYP1B1|FLNA|FN1|CCN1|ITGA6|ITGAV|PTN|SPARC|WNT7A|FERMT1	13	-4.53333
0	tan	GO:2000147	positive regulation of cell motility	0	0	-8
-4.27095	turquoise	GO:2000147	positive regulation of cell motility	ARF6|RHOC|ATP5F1B|CD74|CLDN4|CLDN7|F2RL1|HRAS|HSPB1|LGALS3|MDM2|CD99|PTGS2|RAC1|THBS1|TIAM1|TJP1|RAB11A|FADD|CLDN1|OXSR1|CIB1|PDCD10|RHOD|RIN2|S100A14|EPB41L5|CLEC7A|TMEM102	29	-0.266667
-6.08605	yellow	GO:2000147	positive regulation of cell motility	CALR|IGFBP5|CXCL8|ITGA3|ITGB1|LAMC2|SERPINE1|RRAS|SNAI2|TGFB1|RACK1|GPNMB|PDPN|FERMT2|CAVIN1	15	-4
-2.55951	black	GO:0045785	positive regulation of cell adhesion	ANXA1|IL4R|PTAFR|RELA|RREB1|SDC4|BCL10|CYRIB|SELENOK	9	-5.6
0	blue	GO:0045785	positive regulation of cell adhesion	0	0	-8
-2.19821	brown	GO:0045785	positive regulation of cell adhesion	ANK3|BCL6|DOCK1|HMGB1|PTPN6|SOX4|SOCS1|CITED2|VAV3|NFKBIZ	10	-5.33333
0	cyan	GO:0045785	positive regulation of cell adhesion	0	0	-8
0	green	GO:0045785	positive regulation of cell adhesion	0	0	-8
0	greenyellow	GO:0045785	positive regulation of cell adhesion	0	0	-8
-2.26421	magenta	GO:0045785	positive regulation of cell adhesion	BMP7|FLOT2|HES1|LAMB1|KITLG|SMARCA2|TGFB2|WNT4	8	-5.86667
0	pink	GO:0045785	positive regulation of cell adhesion	0	0	-8
0	purple	GO:0045785	positive regulation of cell adhesion	0	0	-8
-2.43645	red	GO:0045785	positive regulation of cell adhesion	ACTL6A|AKT1|CD81|IGF2|SMAD3|CD46|MYO10|SMARCD1|NFAT5	9	-5.6
-10.4719	salmon	GO:0045785	positive regulation of cell adhesion	CAV1|COL16A1|FLNA|FN1|CCN1|ITGA6|ITGAV|SMAD7|VIT|SFRP1|TGM2|TPM1|FERMT1	13	-4.53333
0	tan	GO:0045785	positive regulation of cell adhesion	0	0	-8
-3.05518	turquoise	GO:0045785	positive regulation of cell adhesion	CD74|CD55|EMP2|GSK3B|HLA-DRA|IL18|JUP|AFDN|NCK1|RAC1|SMARCC1|TJP1|NCK2|RIPK2|FADD|CIB1|AGR2|RHOD|ZBTB7B|RIN2|EPB41L5|TMEM102	22	-2.13333
-6.48187	yellow	GO:0045785	positive regulation of cell adhesion	B2M|CALR|RUNX1|CD44|EGR3|IGFBP2|ITGA3|P4HB|RPS3|RRAS|PDPN|HSPH1|FERMT2|CD276	14	-4.26667
0	black	GO:0045596	negative regulation of cell differentiation	0	0	-8
0	blue	GO:0045596	negative regulation of cell differentiation	0	0	-8
-10.9907	brown	GO:0045596	negative regulation of cell differentiation	ABCA1|ASCL2|BCL6|ZFP36L2|TSPO|DDIT3|EFNA1|EFEMP1|HMGB1|ID2|ID3|ID4|MEIS2|NFE2L2|PIK3R1|RGS2|SOX4|TP63|SOCS1|TSC22D1|BCL7C|MAFB|SPRY2|SEMA3C|CCDC85B|ANKRD26|BCL11A|CNTN4	28	-0.533333
0	cyan	GO:0045596	negative regulation of cell differentiation	0	0	-8
0	green	GO:0045596	negative regulation of cell differentiation	0	0	-8
-2.37488	greenyellow	GO:0045596	negative regulation of cell differentiation	HNRNPU|PTPN2|SRSF6|SOD2|FST|SPRED1	6	-6.4
-6.22812	magenta	GO:0045596	negative regulation of cell differentiation	BMP7|HES1|MEIS1|PAX6|RARB|SMARCA2|TGFB2|BTG2|ABCG1|TOB1|FOXP1|PDCD4|WNT4|OVOL2|SEMA4A|LBH|JDP2	17	-3.46667
0	pink	GO:0045596	negative regulation of cell differentiation	0	0	-8
0	purple	GO:0045596	negative regulation of cell differentiation	0	0	-8
0	red	GO:0045596	negative regulation of cell differentiation	0	0	-8
-3.76219	salmon	GO:0045596	negative regulation of cell differentiation	APP|CAV1|COL5A2|ITGAV|SMAD7|PTN|SFRP1|WNT7A	8	-5.86667
0	tan	GO:0045596	negative regulation of cell differentiation	0	0	-8
0	turquoise	GO:0045596	negative regulation of cell differentiation	0	0	-8
0	yellow	GO:0045596	negative regulation of cell differentiation	0	0	-8
-2.38957	black	GO:0000278	mitotic cell cycle	EIF4E|GSPT1|PPP2CB|ZNF207|VPS4B|ARPP19|FBXW11|NABP1|NAA50|TUBB6	10	-5.33333
-8.52205	blue	GO:0000278	mitotic cell cycle	CCND3|CETN2|DYNC1H1|DNM2|EZH2|GOLGA2|MCM4|PAFAH1B1|PTPA|PPP5C|RAD21|CUL4B|BECN1|BABAM2|CKAP5|DCTN2|TACC2|JTB|EXOC3|CLASP1|NIPBL|POLDIP2|TRIAP1|CHMP5|ANAPC11|EXOC6|PBRM1|TRIM36|EXOC1|TTYH1|MTA3|REEP4|NEK9|SNX18|BROX|EML3|KMT5A|MZT1	38	2.13333
-4.36483	brown	GO:0000278	mitotic cell cycle	ANK3|APC|RHOB|CCNG2|ID2|ID4|STMN1|PCNA|PTPN6|MBTPS1|IER3|SPRY2|PLK2|CCNI|NOP53|TTC19	16	-3.73333
0	cyan	GO:0000278	mitotic cell cycle	0	0	-8
0	green	GO:0000278	mitotic cell cycle	0	0	-8
0	greenyellow	GO:0000278	mitotic cell cycle	0	0	-8
0	magenta	GO:0000278	mitotic cell cycle	0	0	-8
0	pink	GO:0000278	mitotic cell cycle	0	0	-8
0	purple	GO:0000278	mitotic cell cycle	0	0	-8
-4.4526	red	GO:0000278	mitotic cell cycle	RCC1|KIF2A|PRKDC|RBBP8|SON|TPR|CUL4A|BANF1|USP8|TUBB4B|UBE2S|EML4|SEH1L|SDE2	14	-4.26667
0	salmon	GO:0000278	mitotic cell cycle	0	0	-8
0	tan	GO:0000278	mitotic cell cycle	0	0	-8
-2.43593	turquoise	GO:0000278	mitotic cell cycle	RHOC|CCND1|CALM1|CDKN1A|CLTC|PLK3|ENSA|MDM2|CDK16|PPP2CA|RB1|CLIP1|TUBB2A|RAB11A|PDCD6IP|CIB1|EXOC5|CHMP2B|CHMP2A|TMOD3|TAOK3|SNX9|SIRT7|CHMP4C	24	-1.6
0	yellow	GO:0000278	mitotic cell cycle	0	0	-8
-6.03243	black	GO:0061024	membrane organization	SLC25A5|BAK1|BCL2L1|CSNK1D|CTSL|HK2|UGCG|RAB7A|VPS4B|NDRG1|ARFGAP3|PRELID1|SERP1|UBAP1|A4GALT|RAB5IF|VPS37B|VMP1	18	-3.2
-10.8088	blue	GO:0061024	membrane organization	BAD|BNIP3L|CHRNB1|AP2M1|DNM2|GSN|LMNB1|OSBP|PAFAH1B1|ATP8B1|SPG7|EEA1|VAMP4|STX10|BECN1|GBF1|SNAP23|SYNGR2|STX8|MFN2|PDCD6|TOM1|FLOT1|BET1|VTI1B|MTX2|EXOC3|TRAM1|MTCH2|SAMM50|TRAPPC12|TRIAP1|CHMP5|EXOC6|VPS37C|EXOC1|SH3GLB2|PITPNM2|KLHL12|TRAPPC6A|REEP4|PITPNM3|ALKBH7|SEC16B|SNX18|BROX|UBXN2A|MICOS10	48	4.8
0	brown	GO:0061024	membrane organization	0	0	-8
0	cyan	GO:0061024	membrane organization	0	0	-8
-2.00855	green	GO:0061024	membrane organization	GET3|BAX|CLCN3|CNP|RER1|SNF8|TMEM14A|DBNL|TRAPPC1|VPS25|BLOC1S2	11	-5.06667
0	greenyellow	GO:0061024	membrane organization	0	0	-8
0	magenta	GO:0061024	membrane organization	0	0	-8
0	pink	GO:0061024	membrane organization	0	0	-8
0	purple	GO:0061024	membrane organization	0	0	-8
-2.04043	red	GO:0061024	membrane organization	AKT1|RCC1|PLEC|BANF1|HUWE1|LPCAT3|SEC24B|IMMT|MYOF|CCDC47|SMURF1	11	-5.06667
-3.61953	salmon	GO:0061024	membrane organization	ATP1B1|BNIP3|CAV1|CAV2|CLU|SPTBN1|NPC2|AGRN	8	-5.86667
0	tan	GO:0061024	membrane organization	0	0	-8
-11.4413	turquoise	GO:0061024	membrane organization	BOK|CD9|CIDEA|AP3S1|EMP2|GSK3B|MAL|NPC1|NSF|NECTIN2|RAC1|SLC9A1|VAMP7|THBS1|VDAC2|VAMP8|STX11|WASL|NHERF1|PLEKHM1|C2CD2L|OSBPL2|PDCD6IP|PPIF|TMEM147|ACAA2|EXOC5|CHP1|TMCC1|CORO1C|MTCH1|CHMP2B|TRAPPC3|CHMP2A|PACSIN3|SH3GLB1|GLTP|SNX9|SAMD9|FNBP1L|BAIAP2L1|VPS18|PALS1|CHMP4C|ATP5IF1|TLCD1|TOR1AIP2|TMEM102|STX19|TOMM6	50	5.33333
0	yellow	GO:0061024	membrane organization	0	0	-8
-2.15057	black	GO:0051668	localization within membrane	EPHA2|EZR|SLMAP|RAB7A|RAB10|MACF1|ZDHHC5|RAB5IF|VPS37B	9	-5.6
-5.97101	blue	GO:0051668	localization within membrane	BSG|ERBB2|LMNB1|PRKCZ|PSMD10|RAB6A|RAP1A|SORL1|SRP9|SRP68|SSNA1|VAMP4|FLOT1|ARFGEF2|MTX2|GGA2|EFR3A|TRAM1|MTCH2|RAB3GAP2|SAMM50|RAB14|EXOC6|VPS37C|ZDHHC4|EXOC1|SNX27|IFT20|ARL13B|ZDHHC20|HYCC2	31	0.266667
0	brown	GO:0051668	localization within membrane	0	0	-8
0	cyan	GO:0051668	localization within membrane	0	0	-8
-2.49217	green	GO:0051668	localization within membrane	GET3|BAX|SSR3|RER1|SNF8|VPS35|FRMD8|ZDHHC12|COMMD1|ZDHHC24	10	-5.33333
0	greenyellow	GO:0051668	localization within membrane	0	0	-8
0	magenta	GO:0051668	localization within membrane	0	0	-8
0	pink	GO:0051668	localization within membrane	0	0	-8
0	purple	GO:0051668	localization within membrane	0	0	-8
0	red	GO:0051668	localization within membrane	0	0	-8
-4.54883	salmon	GO:0051668	localization within membrane	ATP1B1|CAV1|FLNA|PTN|SPTBN1|ARL4C|SEC63|AGRN	8	-5.86667
0	tan	GO:0051668	localization within membrane	0	0	-8
-8.16577	turquoise	GO:0051668	localization within membrane	ARF6|CDH1|CPE|EMP2|EPS15|GOLGA4|JUP|MAL|AFDN|NPC1|NSF|RAC1|RALA|TIAM1|PIP5K1A|RAB11A|NHERF1|OPTN|TMEM147|MYL12A|EXOC5|PKP3|LMTK2|MTCH1|ARL5A|SH3GLB1|PDZD11|PARD3|RRAGC|PALS1|TSPAN14|CRB3|ZFAND2B|DENND1B|ARL5B|TOMM6	36	1.6
0	yellow	GO:0051668	localization within membrane	0	0	-8
-2.43507	black	GO:0006886	intracellular protein transport	AUP1|SFN|YWHAG|RAB7A|XPO6|ARFGAP3|UBAP1|AKIRIN2|VPS37B|HM13|RAB43	11	-5.06667
-12.0735	blue	GO:0006886	intracellular protein transport	AP2A2|ARF5|SCARB2|AP2M1|TRIM37|PPM1A|RAB6A|RAB27B|SEL1L|SORL1|SRP9|SRP68|STXBP3|SYK|STX10|BECN1|AIFM1|STX8|GCC2|IPO13|MFN2|PDCD6|TIMM17B|VTI1B|MTX2|ERP29|IFT27|COPG1|GGA2|VPS13A|TRAM1|MTCH2|RAB3GAP2|SAMM50|COPG2|TNPO2|FIS1|HIKESHI|RAB14|EXOC6|PXK|VPS37C|ZDHHC4|CAMSAP3|SNX27|RPAIN|MON1A|ZDHHC20	48	4.8
0	brown	GO:0006886	intracellular protein transport	0	0	-8
-2.12184	cyan	GO:0006886	intracellular protein transport	CTTN|COPZ1|SEC61G|ROMO1	4	-6.93333
-3.23117	green	GO:0006886	intracellular protein transport	GET3|BAX|AP1S1|AP2S1|CTSA|SORT1|SSR3|SNF8|TMED3|VPS35|VPS25|ZDHHC12|ZDHHC24	13	-4.53333
0	greenyellow	GO:0006886	intracellular protein transport	0	0	-8
0	magenta	GO:0006886	intracellular protein transport	0	0	-8
-4.9813	pink	GO:0006886	intracellular protein transport	BID|HSPA5|KPNB1|NFKBIA|RAN|TUBA1A|ARHGEF2|TOMM40|RAB31|PMPCA|TIMM10|NXT1|SELENOS|GRPEL1|TOMM5	15	-4
0	purple	GO:0006886	intracellular protein transport	0	0	-8
0	red	GO:0006886	intracellular protein transport	0	0	-8
0	salmon	GO:0006886	intracellular protein transport	0	0	-8
0	tan	GO:0006886	intracellular protein transport	0	0	-8
-8.49504	turquoise	GO:0006886	intracellular protein transport	AP1B1|ARL4D|ARF6|PTTG1IP|CD74|CDKN1A|AP3S1|CLTA|CLTC|HSPB1|KIF5B|LAMP2|MYO6|NSF|YWHAB|STX11|RAB11A|BAG3|EDEM1|GIPC1|CHP1|RAB18|EXPH5|KIF13B|MTCH1|ARL5A|TMED5|SNX9|RAB24|ZFAND6|ERBIN|PARD3|MFF|RAB22A|VPS18|MLPH|LONP2|MGARP|ZFAND2B|ARL5B|STX19|TOMM6	42	3.2
0	yellow	GO:0006886	intracellular protein transport	0	0	-8
0	black	R-HSA-1474244	Extracellular matrix organization	0	0	-8
0	blue	R-HSA-1474244	Extracellular matrix organization	0	0	-8
0	brown	R-HSA-1474244	Extracellular matrix organization	0	0	-8
0	cyan	R-HSA-1474244	Extracellular matrix organization	0	0	-8
0	green	R-HSA-1474244	Extracellular matrix organization	0	0	-8
0	greenyellow	R-HSA-1474244	Extracellular matrix organization	0	0	-8
0	magenta	R-HSA-1474244	Extracellular matrix organization	0	0	-8
0	pink	R-HSA-1474244	Extracellular matrix organization	0	0	-8
0	purple	R-HSA-1474244	Extracellular matrix organization	0	0	-8
0	red	R-HSA-1474244	Extracellular matrix organization	0	0	-8
-15.9862	salmon	R-HSA-1474244	Extracellular matrix organization	APP|SERPINH1|CD151|COL5A2|COL7A1|COL16A1|COL17A1|FN1|ITGA6|ITGAV|ITGB4|HTRA1|SPARC|COL18A1|AGRN	15	-4
0	tan	R-HSA-1474244	Extracellular matrix organization	0	0	-8
0	turquoise	R-HSA-1474244	Extracellular matrix organization	0	0	-8
-11.1493	yellow	R-HSA-1474244	Extracellular matrix organization	CD44|DCN|ITGA3|ITGB1|ITGB6|LAMA3|LAMC2|LOXL1|MMP1|P4HA1|P4HB|SERPINE1|TGFB1|TIMP1|LTBP4|P3H2	16	-3.73333
-2.30692	black	GO:0030855	epithelial cell differentiation	ANXA1|EPHA2|SFN|MYO1E|MAP2K1|ST14|UGCG|EZR|SLC4A7|RAB10	10	-5.33333
0	blue	GO:0030855	epithelial cell differentiation	0	0	-8
-5.37439	brown	GO:0030855	epithelial cell differentiation	CEBPB|EPAS1|FGFR2|GSTM3|ID2|ID3|KRT15|PCNA|PDE4D|SOX4|NR2F2|VEZF1|TP63|MAFB|TXNIP|NFKBIZ|ZNF703|RILPL2	18	-3.2
0	cyan	GO:0030855	epithelial cell differentiation	0	0	-8
0	green	GO:0030855	epithelial cell differentiation	0	0	-8
0	greenyellow	GO:0030855	epithelial cell differentiation	0	0	-8
-2.08966	magenta	GO:0030855	epithelial cell differentiation	BMP7|CASP6|CBR1|HES1|PAX6|RARB|WNT4|OVOL2|LBH	9	-5.6
0	pink	GO:0030855	epithelial cell differentiation	0	0	-8
-5.1856	purple	GO:0030855	epithelial cell differentiation	CNN3|CLDN3|CTSB|ICAM1|KRT4|KRT19|PLS1|MTSS1|DHRS9|KRT23|EHF	11	-5.06667
-2.17929	red	GO:0030855	epithelial cell differentiation	AKT1|BCR|CDH3|SMAD3|PLEC|TAGLN2|SAFB2|SEC24B|ZNF800|ASXL1	10	-5.33333
-6.98811	salmon	GO:0030855	epithelial cell differentiation	CAV1|FLNA|NRG1|KRT7|TAGLN|VIM|WNT7A|BASP1|PALLD|CLIC4|COL18A1	11	-5.06667
0	tan	GO:0030855	epithelial cell differentiation	0	0	-8
-7.38432	turquoise	GO:0030855	epithelial cell differentiation	ANXA7|CDKN1A|DSP|F2RL1|GPX1|IRF6|KRT3|KRT12|LGALS3|AFDN|MYD88|MYO6|NOTCH2|PPL|RARG|SDC1|TJP1|UPK1B|PIP5K1A|AKR1C3|EDF1|SCEL|CLDN1|NHERF1|AGR2|SPINT2|EXPH5|KAZN|TOLLIP|CYP26B1|TIGAR|EPB41L5|TMEM79|MARVELD2|KRT24|CERS3|KRT27	37	1.86667
0	yellow	GO:0030855	epithelial cell differentiation	0	0	-8
-3.68877	black	GO:0008544	epidermis development	ANXA1|EPHA2|SFN|MAP2K1|RELA|ST14|UGCG|SLC4A7|ELOVL1	9	-5.6
0	blue	GO:0008544	epidermis development	0	0	-8
0	brown	GO:0008544	epidermis development	0	0	-8
0	cyan	GO:0008544	epidermis development	0	0	-8
0	green	GO:0008544	epidermis development	0	0	-8
-2.26593	greenyellow	GO:0008544	epidermis development	ATP2A2|MET|YBX1|FST	4	-6.93333
-4.76218	magenta	GO:0008544	epidermis development	ACVR1B|ALDH3A2|FLOT2|HES1|LAMA5|PAX6|TGFB2|LGR4|OVOL2|FOXQ1	10	-5.33333
0	pink	GO:0008544	epidermis development	0	0	-8
0	purple	GO:0008544	epidermis development	0	0	-8
0	red	GO:0008544	epidermis development	0	0	-8
-3.09537	salmon	GO:0008544	epidermis development	COL7A1|COL17A1|KRT7|PALLD|CLIC4	5	-6.66667
0	tan	GO:0008544	epidermis development	0	0	-8
-8.30783	turquoise	GO:0008544	epidermis development	CDKN1A|CLDN4|DSP|EMP1|IL18|IRF6|KRT3|MYO6|PPL|PIP5K1A|AKR1C3|SCEL|CLDN1|NHERF1|AGPAT2|EXPH5|KAZN|GRHL1|NSDHL|CYP26B1|GRHL3|ZNF750|TMEM79|CD109|CERS3|KRT27|CYSRT1	27	-0.8
0	yellow	GO:0008544	epidermis development	0	0	-8
0	black	GO:0006325	chromatin organization	0	0	-8
-3.99135	blue	GO:0006325	chromatin organization	EZH2|LMNB1|TRIM37|RAD21|RBBP4|SMARCA4|SMARCD2|SMARCE1|ARID1A|NCOA1|KAT2B|BABAM2|KDM5B|MORF4L1|ZZEF1|WBP2|ZMYND8|NIPBL|KMT5B|PIH1D1|PBRM1|PHF10|MTA3|KMT2C|ANTKMT|SETD7|TDRD3|RIOX2|PWWP3A|ZNF827|PWWP2B|INO80E|KMT5A	33	0.8
-3.68157	brown	GO:0006325	chromatin organization	BCL6|NR3C1|H1-5|H2AX|HMGB1|HIRIP3|TP63|BCL7C|PSIP1|MPHOSPH8|KMT2E|TSPYL2|NFKBIZ|NUCKS1|SMC6|EPC1|METTL23	17	-3.46667
0	cyan	GO:0006325	chromatin organization	0	0	-8
0	green	GO:0006325	chromatin organization	0	0	-8
-2.24368	greenyellow	GO:0006325	chromatin organization	CHD1|FBL|HNRNPU|LMNA|KDM6B|DNAJC2	6	-6.4
-7.23491	magenta	GO:0006325	chromatin organization	RERE|HMGB2|ING2|NDN|PAX6|PER1|SMARCA2|TFAP2C|CBX4|PER2|CBX1|ING4|PHF21A|JADE1|HDAC10|CHD6|H2AC25|JDP2|PRIMPOL	19	-2.93333
0	pink	GO:0006325	chromatin organization	0	0	-8
0	purple	GO:0006325	chromatin organization	0	0	-8
-6.31395	red	GO:0006325	chromatin organization	ACTL6A|H2AZ1|IGF2|MLLT6|TRIM27|SMARCD1|HAT1|BANF1|BTAF1|BCL7B|SELENOF|HUWE1|ANP32B|NFAT5|SCMH1|SIN3A|RIF1|ASXL1|JMJD1C	19	-2.93333
0	salmon	GO:0006325	chromatin organization	0	0	-8
0	tan	GO:0006325	chromatin organization	0	0	-8
0	turquoise	GO:0006325	chromatin organization	0	0	-8
0	yellow	GO:0006325	chromatin organization	0	0	-8
-3.26882	black	GO:0071345	cellular response to cytokine stimulus	ACTG1|ACTN4|SLC25A5|CAPN2|HK2|IFNGR2|IL4R|RELA|UGCG|ACTR3|MRPL15|JAGN1|RAB43	13	-4.53333
0	blue	GO:0071345	cellular response to cytokine stimulus	0	0	-8
-3.94752	brown	GO:0071345	cellular response to cytokine stimulus	ABCA1|ZFP36L2|DPYSL3|DUSP1|EGR1|FOXC1|FOS|NFE2L2|PTPN6|SRSF7|SOCS1|SOCS3|BCLAF1|SPRY2|IL20RB|NFKBIZ|ARID5B	17	-3.46667
0	cyan	GO:0071345	cellular response to cytokine stimulus	0	0	-8
0	green	GO:0071345	cellular response to cytokine stimulus	0	0	-8
0	greenyellow	GO:0071345	cellular response to cytokine stimulus	0	0	-8
0	magenta	GO:0071345	cellular response to cytokine stimulus	0	0	-8
-4.7544	pink	GO:0071345	cellular response to cytokine stimulus	EXT1|HSPA5|IFI16|IFNGR1|IL6ST|MT3|NCL|NFKBIA|TNFRSF1A|ZYX|FOSL1|YBX3|OSMR|ARHGEF2|TNIP2	15	-4
-6.1039	purple	GO:0071345	cellular response to cytokine stimulus	ETV3|F3|GBP1|CXCL2|ICAM1|LYN|IFITM1|IL1RL2|STK39|DUOX2|ZC3H12A|IL33|STING1	13	-4.53333
-2.15569	red	GO:0071345	cellular response to cytokine stimulus	AKT1|IL6R|MAT2A|SRSF3|STAT6|TPR|RRAGA|NFAT5|SIN3A|CACYBP|RIF1	11	-5.06667
-2.28589	salmon	GO:0071345	cellular response to cytokine stimulus	CAV1|CYP1B1|IFI27|SMAD7|SFRP1|VIM	6	-6.4
0	tan	GO:0071345	cellular response to cytokine stimulus	0	0	-8
-5.72931	turquoise	GO:0071345	cellular response to cytokine stimulus	ATP5F1B|CALM1|CD58|CD74|ACSL1|GSK3B|UBE2K|IL18|JARID2|KIF5B|MYD88|RAD23B|RARG|SLC12A2|STAT1|THBS1|TRIM25|MKKS|KMO|RIPK2|RPS6KA4|CLDN1|CTR9|OXSR1|ACTR2|ST3GAL6|CIB1|GIPC1|PDCD10|CLCF1|IL20RA|ZFAND6|TOLLIP|BSPRY|PID1|ERBIN|TXNDC17	37	1.86667
-3.80953	yellow	GO:0071345	cellular response to cytokine stimulus	ATIC|CD44|CDK4|GAPDH|CXCL1|HSP90AB1|CXCL8|IL13RA1|P4HB|RPL3|RPS3|RPS16|CXCL6	13	-4.53333
-2.10322	black	GO:0019725	cellular homeostasis	BAK1|GLS|HK2|HMOX1|TXNRD1|RAB7A|SLC4A7|LRRC8A|SELENOK|MCU	10	-5.33333
-2.97151	blue	GO:0019725	cellular homeostasis	ATP7A|SLC31A1|PCK1|PDK3|STXBP3|PRDX2|WNT7B|CREG1|NR1D1|ABCB6|WDTC1|ISCU|FBXO4|FIS1|GLRX5|ATP6V1H|MCUB|BDH2|MCUR1|KCTD17|CYBRD1|CCDC115|SMDT1|ORMDL3|ANKRD9|DEDD2|FRRS1	27	-0.8
0	brown	GO:0019725	cellular homeostasis	0	0	-8
0	cyan	GO:0019725	cellular homeostasis	0	0	-8
0	green	GO:0019725	cellular homeostasis	0	0	-8
0	greenyellow	GO:0019725	cellular homeostasis	0	0	-8
0	magenta	GO:0019725	cellular homeostasis	0	0	-8
0	pink	GO:0019725	cellular homeostasis	0	0	-8
-3.44721	purple	GO:0019725	cellular homeostasis	ATP2A3|ATP6V0A1|CP|ICAM1|PRDX1|S100A8|S100A9|TMBIM6|STK39	9	-5.6
0	red	GO:0019725	cellular homeostasis	0	0	-8
-4.83664	salmon	GO:0019725	cellular homeostasis	APP|ATP1B1|BNIP3|CA2|CAV1|CAV2|TGM2|CLIC4|SLC39A13	9	-5.6
-3.15743	tan	GO:0019725	cellular homeostasis	ATP6V1B2|NQO1|FTH1|SLC12A7|GJB6|SLC39A6|WNK1	7	-6.13333
-3.1155	turquoise	GO:0019725	cellular homeostasis	ATP5F1B|ATP6V1E1|BOK|SLC31A2|GPX1|UBE2K|LAMP2|MCL1|P2RY2|PSEN1|SCNN1A|SLC9A1|SLC12A2|SRI|ATP6V0E1|ATP6V1F|NHERF1|BAG3|OXSR1|SLC12A6|MICU1|CHP1|PRDX5|CHMP2B|ORMDL2|ATP6V1D|CCDC186|RMDN3	28	-0.533333
0	yellow	GO:0019725	cellular homeostasis	0	0	-8
0	black	R-HSA-1500931	Cell-Cell communication	0	0	-8
0	blue	R-HSA-1500931	Cell-Cell communication	0	0	-8
0	brown	R-HSA-1500931	Cell-Cell communication	0	0	-8
0	cyan	R-HSA-1500931	Cell-Cell communication	0	0	-8
0	green	R-HSA-1500931	Cell-Cell communication	0	0	-8
0	greenyellow	R-HSA-1500931	Cell-Cell communication	0	0	-8
0	magenta	R-HSA-1500931	Cell-Cell communication	0	0	-8
0	pink	R-HSA-1500931	Cell-Cell communication	0	0	-8
0	purple	R-HSA-1500931	Cell-Cell communication	0	0	-8
0	red	R-HSA-1500931	Cell-Cell communication	0	0	-8
-6.11022	salmon	R-HSA-1500931	Cell-Cell communication	CD151|COL17A1|FLNA|ITGA6|ITGB4|SPTBN1	6	-6.4
0	tan	R-HSA-1500931	Cell-Cell communication	0	0	-8
-6.97255	turquoise	R-HSA-1500931	Cell-Cell communication	CDH1|CLDN4|CLDN7|CTNNA1|CTNND1|JUP|AFDN|NCK1|NECTIN2|NCK2|WASL|CLDN1|PARD3|PALS1|NECTIN4|CRB3	16	-3.73333
-3.88745	yellow	R-HSA-1500931	Cell-Cell communication	ITGB1|KRT14|LAMA3|LAMC2|FERMT2|FBLIM1	6	-6.4
0	black	GO:0000902	cell morphogenesis	0	0	-8
-2.04061	blue	GO:0000902	cell morphogenesis	ATP7A|CTNNB1|DNM2|CELSR2|ERBB2|FOSL2|ARHGAP35|NOTCH3|PAFAH1B1|PLXNB1|PRKCZ|WNT7B|SEMA3B|SSNA1|FLOT1|STK25|MYCBP2|ZNF385A|C1GALT1C1|NIN|ABITRAM|SHTN1|LRATD1|ARL13B	24	-1.6
-4.36745	brown	GO:0000902	cell morphogenesis	ANK3|APLP2|BCL6|ECE1|EFNA1|FGFR2|STMN1|NBL1|NR4A2|PTPN6|LMO4|FRY|SEMA3C|BOC|C12orf57|CNTN4|RILPL2	17	-3.46667
0	cyan	GO:0000902	cell morphogenesis	0	0	-8
0	green	GO:0000902	cell morphogenesis	0	0	-8
0	greenyellow	GO:0000902	cell morphogenesis	0	0	-8
-3.40789	magenta	GO:0000902	cell morphogenesis	RERE|BMP7|DDR1|HES1|NDN|PAX6|TGFB2|BAIAP2|LPAR3|IGSF9|SEMA4A|ARHGEF28	12	-4.8
0	pink	GO:0000902	cell morphogenesis	0	0	-8
0	purple	GO:0000902	cell morphogenesis	0	0	-8
0	red	GO:0000902	cell morphogenesis	0	0	-8
-3.96609	salmon	GO:0000902	cell morphogenesis	APP|CLU|FLNA|PTN|WNT7A|PALLD|CLIC4|COL18A1	8	-5.86667
0	tan	GO:0000902	cell morphogenesis	0	0	-8
-2.17021	turquoise	GO:0000902	cell morphogenesis	CDH1|KIF5B|NOTCH2|RAC1|RB1|S100A6|TIAM1|UBB|WASL|NHERF1|IST1|ABI1|CAP1|CIB1|SPINT2|CHL1|NCKAP1|NBEAL2|MINK1|TAOK3|PARD3|EPB41L5|NIBAN2|RAPH1|EMB	25	-1.33333
0	yellow	GO:0000902	cell morphogenesis	0	0	-8
0	black	GO:0051301	cell division	0	0	-8
-6.25609	blue	GO:0051301	cell division	CCND3|CETN2|DYNC1H1|GOLGA2|PAFAH1B1|RAD21|SSNA1|BECN1|BABAM2|CKAP5|MAEA|JTB|EXOC3|CLASP1|ANAPC13|ANAPC15|CHMP5|ANAPC11|EXOC6|TRIM36|EXOC1|RCC2|REEP4|PARD6G|NEK9|SNX18|ARL8A|CENPX|EML3|KMT5A	30	0
-2.96845	brown	GO:0051301	cell division	ANK3|APC|RHOB|ZFP36L2|CCNG2|FGFR2|GNAI2|NR3C1|STMN1|TERF1|TP63|TTC19	12	-4.8
0	cyan	GO:0051301	cell division	0	0	-8
0	green	GO:0051301	cell division	0	0	-8
0	greenyellow	GO:0051301	cell division	0	0	-8
0	magenta	GO:0051301	cell division	0	0	-8
-2.06335	pink	GO:0051301	cell division	EXT1|RAN|RTKN|TOP1|TUBA1A|ARHGEF2|GNL3|TUBA1C	8	-5.86667
0	purple	GO:0051301	cell division	0	0	-8
-4.60339	red	GO:0051301	cell division	RCC1|KIF2A|PLEC|RBBP8|SON|TPR|USP8|PDS5A|UBE2S|EML4|BIRC6|SEH1L|SDE2	13	-4.53333
0	salmon	GO:0051301	cell division	0	0	-8
0	tan	GO:0051301	cell division	0	0	-8
-4.22309	turquoise	GO:0051301	cell division	ANXA11|ARF6|RHOC|CCND1|CLTA|CLTC|ENSA|GNAI3|LLGL2|PPP1CB|RALA|RB1|DYNLT3|WASL|RNF8|IST1|PDCD6IP|ACTR2|CIB1|EXOC5|KLHL18|CHMP2B|CHMP2A|SNX9|PARD3|CHMP4C	26	-1.06667
0	yellow	GO:0051301	cell division	0	0	-8
-3.87002	black	GO:0001775	cell activation	ACTG1|SLC25A5|ANXA1|BAK1|CEBPG|CLIC1|CTSL|IFNGR2|IL4R|ST3GAL1|NDRG1|CHD7|LRRC8A|SELENOK	14	-4.26667
0	blue	GO:0001775	cell activation	0	0	-8
-3.04802	brown	GO:0001775	cell activation	ASCL2|BCL6|ZFP36L2|EGR1|HMGB1|PIK3R1|PTPN6|SOX4|SOCS3|MAFB|VAV3|IL20RB|ITFG2|KMT2E|NFKBIZ	15	-4
0	cyan	GO:0001775	cell activation	0	0	-8
0	green	GO:0001775	cell activation	0	0	-8
-2.3807	greenyellow	GO:0001775	cell activation	PDIA3|HSPD1|LTBR|PLAT|PTPN2|EXOSC3	6	-6.4
0	magenta	GO:0001775	cell activation	0	0	-8
0	pink	GO:0001775	cell activation	0	0	-8
-2.02072	purple	GO:0001775	cell activation	HLA-E|ICAM1|LYN|PRDX1|PLSCR1|STK39|IL33	7	-6.13333
0	red	GO:0001775	cell activation	0	0	-8
-2.31454	salmon	GO:0001775	cell activation	APP|CD151|CLU|FLNA|S100A13|WNT7A	6	-6.4
0	tan	GO:0001775	cell activation	0	0	-8
-4.30104	turquoise	GO:0001775	cell activation	CD9|CD74|KLF6|DGKA|EMP2|F2RL1|HSPB1|IL18|MDM2|MYD88|NCK1|NOTCH2|PSEN1|RAP2B|VAMP7|NCK2|LY6D|RIPK2|FADD|RNF8|MYL12A|GNA13|KIF13B|CLCF1|BLNK|ZBTB7B|TOLLIP|CYP26B1|SLURP1|CLEC7A|ITCH|JAML|TICAM1	33	0.8
-5.77556	yellow	GO:0001775	cell activation	B2M|BST2|CD44|CXCL8|ITGB1|ITGB6|MSN|MYH9|SERPINE2|PPIA|RPS6|CXCL6|TGFB1|PDPN|RGCC|CD276	16	-3.73333
-3.9441	black	GO:0030036	actin cytoskeleton organization	ACTG1|ACTN4|ANXA1|DIAPH1|MYO1E|PTPN1|TNFAIP1|TPM3|VASP|EZR|WDR1|ACTR3	12	-4.8
0	blue	GO:0030036	actin cytoskeleton organization	0	0	-8
0	brown	GO:0030036	actin cytoskeleton organization	0	0	-8
0	cyan	GO:0030036	actin cytoskeleton organization	0	0	-8
-4.3441	green	GO:0030036	actin cytoskeleton organization	CAPG|CAPZB|SPTBN2|ARPC3|ARPC2|ARPC1A|MSRB2|CD2AP|DBNL|PHPT1|PDLIM2|POF1B|NUAK2	13	-4.53333
0	greenyellow	GO:0030036	actin cytoskeleton organization	0	0	-8
0	magenta	GO:0030036	actin cytoskeleton organization	0	0	-8
-2.45811	pink	GO:0030036	actin cytoskeleton organization	PFN1|RAN|RTKN|ZYX|ARHGEF2|RUFY3|MRTFA|ARPC5L|FMNL2	9	-5.6
-2.07023	purple	GO:0030036	actin cytoskeleton organization	CNN3|CLDN3|KRT19|PLS1|MTSS1|MARCKSL1	6	-6.4
0	red	GO:0030036	actin cytoskeleton organization	0	0	-8
-2.94941	salmon	GO:0030036	actin cytoskeleton organization	CALD1|FLNA|SPTBN1|TPM1|PALLD|CAVIN3	6	-6.4
0	tan	GO:0030036	actin cytoskeleton organization	0	0	-8
-13.9439	turquoise	GO:0030036	actin cytoskeleton organization	ARF6|RHOC|RND3|CAPZA1|CAPZA2|EMP2|EPB41L1|FLII|LLGL2|MARCKS|MYO5B|MYO6|NCK1|PLS3|TWF1|RAC1|TJP1|TNNT3|PIP5K1A|NCK2|WASL|TRIP10|NHERF1|CDC42BPB|ABI1|PDCD6IP|DNAJB6|ARPC5|ARPC1B|ACTR2|CAP1|PDLIM5|NCKAP1|DSTN|CORO1C|TMOD3|RHOD|MINK1|AMOTL2|GDPD2|BAIAP2L1|EPB41L5|MYH14|SCIN|RHOV	45	4
-3.81917	yellow	GO:0030036	actin cytoskeleton organization	CALR|CXCL1|ITGB1|MYH9|RAB13|SHC1|TPM2|PDLIM1|PDLIM7|PLEK2|LIMA1	11	-5.06667
