# Supplementary material for: Long-read single-cell RNA sequencing analysis of key genes and isoforms during corneal wound healing in cynomolgus monkeys
Source: Research Square preprint supplement (doi:10.21203/rs.3.rs-5232061/v1), 2025-03-05
Supplement: Supplementary file 3 [file Supplementary Data11_LSC and BC functional gene interactions.xlsx]

## Sheet: LSC
AverageShortestPathLength	BetweennessCentrality	ClosenessCentrality	ClusteringCoefficient	Degree	Eccentricity	IsSingleNode	MCODE::Clusters (1)	MCODE::Node Status (1)	MCODE::Score (1)	name	NeighborhoodConnectivity	NumberOfDirectedEdges	NumberOfUndirectedEdges	PartnerOfMultiEdgedNodePairs	Radiality	selected	SelfLoops	shared name	Stress	TopologicalCoefficient
2.30952	0.00416948	0.43299	0.681319	14	4	FALSE	Cluster 1	Seed	8.31818	ITGA3	17.2143	0	14	0	0.961485	FALSE	0	ITGA3	322	0.351312
2.41667	0.00105862	0.413793	0.833333	12	5	FALSE	Cluster 1	Clustered	8.31818	LAMA5	17.75	0	12	0	0.958333	FALSE	0	LAMA5	86	0.38587
2.36905	0.00185688	0.422111	0.80303	12	4	FALSE	Cluster 1	Clustered	8.31818	LAMB1	17.8333	0	12	0	0.959734	FALSE	0	LAMB1	162	0.379433
2.2619	0.00812289	0.442105	0.67033	14	4	FALSE	Cluster 1	Clustered	8.31818	ITGAV	17	0	14	0	0.962885	FALSE	0	ITGAV	504	0.326923
1.96429	0.0769525	0.509091	0.32	26	4	FALSE	Cluster 1	Clustered	8.31818	ITGB1	13.3462	0	26	0	0.971639	FALSE	0	ITGB1	2556	0.211233
2.52381	0.00120317	0.396226	0.727273	11	5	FALSE	Cluster 1	Clustered	8	LAMA3	15.5455	0	11	0	0.955182	FALSE	0	LAMA3	74	0.388636
1.72619	0.164605	0.57931	0.26025	34	4	FALSE	Cluster 1	Clustered	8	FN1	12.4412	0	34	0	0.978641	FALSE	0	FN1	4826	0.169621
2.5119	0.00122925	0.398104	0.757576	12	5	FALSE	Cluster 1	Clustered	7.56364	LAMC2	16	0	12	0	0.955532	FALSE	0	LAMC2	76	0.4
2.28571	0.00571924	0.4375	0.705128	13	4	FALSE	Cluster 1	Clustered	7.56364	ITGB6	16.4615	0	13	0	0.962185	FALSE	0	ITGB6	308	0.316568
2.05952	0.0254138	0.485549	0.445887	22	5	FALSE	Cluster 1	Clustered	7.56364	THBS1	15.5	0	22	0	0.968838	FALSE	0	THBS1	1050	0.25
2.16667	0.0314133	0.461538	0.470588	17	4	FALSE	Cluster 1	Clustered	7.56364	ITGB4	14.1176	0	17	0	0.965686	FALSE	0	ITGB4	920	0.243408
2.07143	0.0512652	0.482759	0.35	16	4	FALSE	Cluster 1	Clustered	7	VIM	15.625	0	16	0	0.968487	FALSE	0	VIM	2052	0.236742
2.17857	0.0066413	0.459016	0.538462	14	4	FALSE	Cluster 1	Clustered	7	LGALS3	17.2143	0	14	0	0.965336	FALSE	0	LGALS3	358	0.291768
1.75	0.238764	0.571429	0.202299	30	4	FALSE	Cluster 1	Clustered	7	GAPDH	10.9	0	30	0	0.977941	FALSE	0	GAPDH	5584	0.141558
2.29762	0.00672129	0.435233	0.564103	13	5	FALSE	Cluster 2	Seed	6.22222	MMP1	16.4615	0	13	0	0.961835	FALSE	0	MMP1	260	0.304843
2.19048	0.0348071	0.456522	0.378788	12	4	FALSE		Unclustered	6	S100A4	14.5833	0	12	0	0.964986	FALSE	0	S100A4	1014	0.245763
2.30952	0.00540287	0.43299	0.581818	11	4	FALSE	Cluster 2	Clustered	6	SPARC	16.7273	0	11	0	0.961485	FALSE	0	SPARC	296	0.321678
2.10714	0.0653675	0.474576	0.361905	15	4	FALSE		Unclustered	6	FLNA	14.2667	0	15	0	0.967437	FALSE	0	FLNA	2304	0.230108
2.20238	0.0574244	0.454054	0.378788	12	5	FALSE	Cluster 2	Clustered	6	PTGS2	14.3333	0	12	0	0.964636	FALSE	0	PTGS2	1614	0.2375
2.35714	0.0239099	0.424242	0.714286	8	5	FALSE	Cluster 2	Clustered	5.78571	CXCL1	19.375	0	8	0	0.960084	FALSE	0	CXCL1	548	0.363208
2.35714	0.00134734	0.424242	0.785714	8	4	FALSE	Cluster 2	Clustered	5.78571	DCN	20.375	0	8	0	0.960084	FALSE	0	DCN	100	0.39951
2.17857	0.00639726	0.459016	0.637363	14	5	FALSE	Cluster 2	Clustered	5.38462	TIMP1	17.5714	0	14	0	0.965336	FALSE	0	TIMP1	346	0.288056
2.21429	0.00466171	0.451613	0.607143	8	4	FALSE		Unclustered	5	MSN	21.125	0	8	0	0.964286	FALSE	0	MSN	300	0.340726
2.22619	0.052101	0.449198	0.454545	11	5	FALSE	Cluster 3	Seed	4.46429	CCN1	17.0909	0	11	0	0.963936	FALSE	0	CCN1	1806	0.284848
2.45238	0.0047586	0.407767	0.5	9	4	FALSE		Unclustered	4.10714	COL7A1	15.5556	0	9	0	0.957283	FALSE	0	COL7A1	206	0.353535
2.44048	0.024232	0.409756	0.277778	9	5	FALSE	Cluster 3	Clustered	4	DSP	10.3333	0	9	0	0.957633	FALSE	0	DSP	648	0.22716
3.05952	0	0.326848	1	4	5	FALSE	Cluster 3	Clustered	4	PERP	7.25	0	4	0	0.939426	FALSE	0	PERP	0	0.483333
2.94048	0.00305835	0.340081	0.466667	6	5	FALSE	Cluster 3	Clustered	4	DSG1	6.5	0	6	0	0.942927	FALSE	0	DSG1	68	0.333333
3.05952	0	0.326848	1	4	5	FALSE	Cluster 3	Clustered	4	DSC2	7.25	0	4	0	0.939426	FALSE	0	DSC2	0	0.483333
2.4881	0.00299019	0.401914	0.6	5	5	FALSE		Unclustered	4	PTN	20.6	0	5	0	0.956232	FALSE	0	PTN	88	0.443478
2.2381	0.0475457	0.446809	0.288889	10	4	FALSE	Cluster 3	Clustered	4	JUP	12.5	0	10	0	0.963585	FALSE	0	JUP	1190	0.221429
2.59524	0.00622018	0.385321	0.6	5	5	FALSE		Unclustered	4	CAV2	15.6	0	5	0	0.953081	FALSE	0	CAV2	136	0.394872
2.89286	0.000355162	0.345679	0.8	5	5	FALSE	Cluster 4	Seed	4	TPM2	9	0	5	0	0.944328	FALSE	0	TPM2	12	0.428571
2.35714	0.0190808	0.424242	0.311111	10	4	FALSE		Unclustered	4	COL5A2	13.7	0	10	0	0.960084	FALSE	0	COL5A2	966	0.291489
2.66667	0.00614628	0.375	0.6	5	5	FALSE	Cluster 4	Clustered	4	MYL12A	12.2	0	5	0	0.95098	FALSE	0	MYL12A	230	0.324324
1.91667	0.163022	0.521739	0.221053	20	4	FALSE	Cluster 3	Clustered	3.77778	CAV1	12.7	0	20	0	0.973039	FALSE	0	CAV1	3570	0.183088
1.88095	0.125758	0.531646	0.275862	29	5	FALSE	Cluster 3	Clustered	3.76667	CD44	12.4138	0	29	0	0.97409	FALSE	0	CD44	3448	0.181542
2.35714	0.000241225	0.424242	0.9	5	5	FALSE	Cluster 3	Clustered	3.73333	LAMP1	25.4	0	5	0	0.960084	FALSE	0	LAMP1	14	0.453571
2.64286	0.0302762	0.378378	0.361111	9	5	FALSE	Cluster 4	Clustered	3.2381	TPM1	8.33333	0	9	0	0.951681	FALSE	0	TPM1	1118	0.27037
2.67857	0.0747529	0.373333	0.361111	9	5	FALSE	Cluster 4	Clustered	3.2381	CALD1	7.88889	0	9	0	0.95063	FALSE	0	CALD1	2808	0.250896
2.57143	0.000153914	0.388889	0.666667	4	5	FALSE		Unclustered	3	TGM2	23.5	0	4	0	0.953782	FALSE	0	TGM2	10	0.546512
3.13095	0.0238095	0.319392	0.5	4	6	FALSE		Unclustered	3	BTG2	5.5	0	4	0	0.937325	FALSE	0	BTG2	688	0.403846
3.08333	0.000852617	0.324324	0.666667	4	6	FALSE		Unclustered	3	FOSB	8.25	0	4	0	0.938725	FALSE	0	FOSB	24	0.485294
2.25	0.0511856	0.444444	0.377778	10	4	FALSE		Unclustered	2.55556	TAGLN	14.1	0	10	0	0.963235	FALSE	0	TAGLN	1778	0.259259
2.36905	0.0057424	0.422111	0.533333	6	5	FALSE		Unclustered	2.4	S100A6	17.6667	0	6	0	0.959734	FALSE	0	S100A6	194	0.32716
2.58333	0.0144732	0.387097	0.466667	6	5	FALSE		Unclustered	2.2	ATF3	10.5	0	6	0	0.953431	FALSE	0	ATF3	490	0.283784
3.17857	0.00102326	0.314607	0.333333	3	6	FALSE		Unclustered	2	S100A2	5.33333	0	3	0	0.935924	FALSE	0	S100A2	12	0.384615
2.85714	0.00447816	0.35	0.166667	4	5	FALSE		Unclustered	2	S100A14	7.75	0	4	0	0.945378	FALSE	0	S100A14	146	0.329545
2.84524	0	0.351464	1	2	5	FALSE		Unclustered	2	TNS4	21.5	0	2	0	0.945728	FALSE	0	TNS4	0	0.741379
2.63095	0.0238095	0.38009	0.333333	3	5	FALSE		Unclustered	2	PAX6	15.6667	0	3	0	0.952031	FALSE	0	PAX6	496	0.45098
2.72619	0	0.366812	1	2	5	FALSE		Unclustered	2	PYGL	16.5	0	2	0	0.94923	FALSE	0	PYGL	0	0.55
2.61905	0.00504836	0.381818	0.333333	3	5	FALSE		Unclustered	2	KRT17	15.3333	0	3	0	0.952381	FALSE	0	KRT17	158	0.394737
2.60714	0.00266131	0.383562	0.333333	3	5	FALSE		Unclustered	2	HSPB1	17.3333	0	3	0	0.952731	FALSE	0	HSPB1	122	0.472222
2.69048	0	0.371681	1	2	5	FALSE		Unclustered	2	CD55	27.5	0	2	0	0.95028	FALSE	0	CD55	0	0.743243
3.0119	0	0.332016	1	2	5	FALSE		Unclustered	2	PALLD	12	0	2	0	0.940826	FALSE	0	PALLD	0	0.631579
2.69048	0.000730131	0.371681	0.333333	3	5	FALSE		Unclustered	2	SLC2A1	12.6667	0	3	0	0.95028	FALSE	0	SLC2A1	22	0.397849
2.72619	0	0.366812	1	2	5	FALSE		Unclustered	2	PPIF	16.5	0	2	0	0.94923	FALSE	0	PPIF	0	0.55
3.14286	0	0.318182	1	2	6	FALSE		Unclustered	2	CEBPD	9	0	2	0	0.936975	FALSE	0	CEBPD	0	0.642857
2.14286	0.0691967	0.466667	0.333333	12	4	FALSE		Unclustered	2	MYH9	13.5	0	12	0	0.966387	FALSE	0	MYH9	2334	0.223611
2.57143	0.0238095	0.388889	0.333333	3	5	FALSE		Unclustered	2	ALDH1A1	20	0	3	0	0.953782	FALSE	0	ALDH1A1	482	0.479675
2.52381	0.00105514	0.396226	0.666667	3	5	FALSE		Unclustered	1.66667	GLUL	22	0	3	0	0.955182	FALSE	0	GLUL	34	0.488889
2.70238	0.000200803	0.370044	0.666667	3	5	FALSE		Unclustered	1.66667	BNIP3	11.6667	0	3	0	0.94993	FALSE	0	BNIP3	4	0.376344
2.59524	0.00113717	0.385321	0	2	4	FALSE		Unclustered	0.666667	MARCKS	21.5	0	2	0	0.953081	FALSE	0	MARCKS	92	0.554054
2.30952	0.0512948	0.43299	0.111111	9	5	FALSE		Unclustered	0.666667	KRT14	11.8889	0	9	0	0.961485	FALSE	0	KRT14	1142	0.210317
3.02381	0.000392044	0.330709	0	2	5	FALSE		Unclustered	0.666667	CDKN2B	8.5	0	2	0	0.940476	FALSE	0	CDKN2B	8	0.5
2.78571	0.000619284	0.358974	0	2	5	FALSE		Unclustered	0.666667	GJB2	14.5	0	2	0	0.947479	FALSE	0	GJB2	16	0.54
2.88095	0.0238095	0.347107	0	2	5	FALSE		Unclustered	0.666667	ATP1A1	10.5	0	2	0	0.944678	FALSE	0	ATP1A1	396	0.5
3.61905	0.0473322	0.276316	0	3	6	FALSE		Unclustered	0.5	KRT7	3.66667	0	3	0	0.922969	FALSE	0	KRT7	1774	0.333333
3.63095	0	0.27541	0	1	6	FALSE		Unclustered	0	PDCD4	9	0	1	0	0.922619	FALSE	0	PDCD4	0	0
3.61905	0	0.276316	0	1	6	FALSE		Unclustered	0	MEIS1	3	0	1	0	0.922969	FALSE	0	MEIS1	0	0
4.60714	0	0.217054	0	1	7	FALSE		Unclustered	0	TACSTD2	3	0	1	0	0.893908	FALSE	0	TACSTD2	0	0
3.29762	0	0.303249	0	1	6	FALSE		Unclustered	0	KRT3	9	0	1	0	0.932423	FALSE	0	KRT3	0	0
1	0	1	0	1	1	FALSE		Unclustered	0	PER3	1	0	1	0	1	FALSE	0	PER3	0	0
1	0	1	0	1	1	FALSE		Unclustered	0	HLF	1	0	1	0	1	FALSE	0	HLF	0	0
4.60714	0	0.217054	0	1	7	FALSE		Unclustered	0	ELF3	3	0	1	0	0.893908	FALSE	0	ELF3	0	0
3.2381	0	0.308824	0	1	5	FALSE		Unclustered	0	DSTN	10	0	1	0	0.934174	FALSE	0	DSTN	0	0
3.34524	0	0.298932	0	1	6	FALSE		Unclustered	0	CXCL14	8	0	1	0	0.931022	FALSE	0	CXCL14	0	0
2.86905	0	0.348548	0	1	6	FALSE		Unclustered	0	SULF2	29	0	1	0	0.945028	FALSE	0	SULF2	0	0
2.86905	0	0.348548	0	1	6	FALSE		Unclustered	0	IGFBP2	29	0	1	0	0.945028	FALSE	0	IGFBP2	0	0
3.19048	0	0.313433	0	1	6	FALSE		Unclustered	0	CBR1	12	0	1	0	0.935574	FALSE	0	CBR1	0	0
2.90476	0	0.344262	0	1	5	FALSE		Unclustered	0	CLIC4	20	0	1	0	0.943978	FALSE	0	CLIC4	0	0
2.90476	0	0.344262	0	1	5	FALSE		Unclustered	0	RHOD	20	0	1	0	0.943978	FALSE	0	RHOD	0	0
2.90476	0	0.344262	0	1	5	FALSE		Unclustered	0	SRI	20	0	1	0	0.943978	FALSE	0	SRI	0	0
4.11905	0	0.242775	0	1	7	FALSE		Unclustered	0	SGK1	4	0	1	0	0.908263	FALSE	0	SGK1	0	0
1	0	1	0	1	1	FALSE		Unclustered	0	ATP5IF1	1	0	1	0	1	FALSE	0	ATP5IF1	0	0
1	0	1	0	1	1	FALSE		Unclustered	0	ATP5F1E	1	0	1	0	1	FALSE	0	ATP5F1E	0	0
3.86905	0	0.258462	0	1	6	FALSE		Unclustered	0	ATP1B1	2	0	1	0	0.915616	FALSE	0	ATP1B1	0	0
3.13095	0	0.319392	0	1	5	FALSE		Unclustered	0	ARPC1B	12	0	1	0	0.937325	FALSE	0	ARPC1B	0	0
3.55952	0	0.280936	0	1	6	FALSE		Unclustered	0	RBP1	3	0	1	0	0.92472	FALSE	0	RBP1	0	0

## Sheet: BC
AverageShortestPathLength	BetweennessCentrality	ClosenessCentrality	ClusteringCoefficient	Degree	Eccentricity	IsSingleNode	MCODE::Clusters (2)	MCODE::Node Status (2)	MCODE::Score (2)	name	NeighborhoodConnectivity	NumberOfDirectedEdges	NumberOfUndirectedEdges	PartnerOfMultiEdgedNodePairs	Radiality	selected	SelfLoops	shared name	Stress	TopologicalCoefficient
2.74627	0.00468369	0.36413	0.563636	11	5	FALSE	Cluster 1	Seed	5.57143	LAMA3	11.1818	0	11	0	0.924075	FALSE	0	LAMA3	142	0.38558
2.74627	0.00267369	0.36413	0.644444	10	5	FALSE	Cluster 1	Clustered	5.57143	LAMC2	12.1	0	10	0	0.924075	FALSE	0	LAMC2	102	0.403333
2.64179	0.00230832	0.378531	0.805556	9	5	FALSE	Cluster 1	Clustered	5.06667	LAMB1	14.2222	0	9	0	0.928618	FALSE	0	LAMB1	96	0.406349
2.83582	0.000344249	0.352632	0.933333	6	5	FALSE	Cluster 1	Clustered	4.7619	LAMB4	13.6667	0	6	0	0.920182	FALSE	0	LAMB4	20	0.488095
2.68657	0.000114866	0.372222	0.933333	6	5	FALSE		Unclustered	4.7619	DCN	16	0	6	0	0.926671	FALSE	0	DCN	4	0.457143
2.07463	0.256821	0.482014	0.205534	23	4	FALSE	Cluster 1	Clustered	4.58182	FN1	8.04348	0	23	0	0.953277	FALSE	0	FN1	3052	0.191941
2.59701	0.00352671	0.385057	0.709091	11	5	FALSE	Cluster 1	Clustered	4.54545	ITGAV	13.6364	0	11	0	0.930565	FALSE	0	ITGAV	130	0.378788
2.32836	0.0693921	0.429487	0.350877	19	5	FALSE	Cluster 1	Clustered	4.54545	ITGB1	10.0526	0	19	0	0.942245	FALSE	0	ITGB1	1320	0.245186
2.43284	0.03165	0.411043	0.408333	16	5	FALSE	Cluster 2	Seed	4.45455	THBS1	10.75	0	16	0	0.937703	FALSE	0	THBS1	726	0.275641
2	0.2411	0.5	0.256917	23	4	FALSE	Cluster 2	Clustered	4.45455	CD44	9.04348	0	23	0	0.956522	FALSE	0	CD44	2814	0.190564
2.44776	0.0204542	0.408537	0.527273	11	4	FALSE	Cluster 2	Clustered	4.02778	TGFB2	12.3636	0	11	0	0.937054	FALSE	0	TGFB2	326	0.325359
2.47761	0.0480007	0.403614	0.371795	13	5	FALSE	Cluster 2	Clustered	4.02778	SDC1	11.1538	0	13	0	0.935756	FALSE	0	SDC1	880	0.291498
2.85075	0	0.350785	1	4	5	FALSE	Cluster 2	Clustered	4	TGM2	17.25	0	4	0	0.919533	FALSE	0	TGM2	0	0.556452
2.70149	0	0.370166	1	4	5	FALSE	Cluster 2	Clustered	4	PTN	19.5	0	4	0	0.926022	FALSE	0	PTN	0	0.541667
2.70149	0.00730965	0.370166	0.6	6	5	FALSE		Unclustered	4	CD151	13.1667	0	6	0	0.926022	FALSE	0	CD151	130	0.454023
2.68657	0.0592492	0.372222	0.4	6	5	FALSE	Cluster 2	Clustered	4	PTGS2	11.5	0	6	0	0.926671	FALSE	0	PTGS2	542	0.338384
2.77612	0.00231836	0.360215	0.722222	9	5	FALSE	Cluster 2	Clustered	3.88889	ITGB6	12.8889	0	9	0	0.922777	FALSE	0	ITGB6	84	0.415771
2.59701	0.00642668	0.385057	0.577778	10	5	FALSE		Unclustered	3.55556	MMP1	12.6	0	10	0	0.930565	FALSE	0	MMP1	152	0.340541
2.41791	0.0805482	0.41358	0.444444	9	4	FALSE	Cluster 3	Seed	3.2381	CLDN7	10.6667	0	9	0	0.938352	FALSE	0	CLDN7	1292	0.280702
3.1194	0.0231947	0.320574	0.3	5	5	FALSE	Cluster 3	Clustered	3	TACSTD2	5.2	0	5	0	0.907852	FALSE	0	TACSTD2	392	0.436364
2.23881	0.168973	0.446667	0.290909	11	4	FALSE	Cluster 3	Clustered	3	VIM	11	0	11	0	0.946139	FALSE	0	VIM	2098	0.240404
2.73134	0.0692591	0.36612	0.5	5	5	FALSE	Cluster 3	Clustered	3	TAGLN	9.2	0	5	0	0.924724	FALSE	0	TAGLN	860	0.2875
3.59701	0	0.278008	1	3	6	FALSE	Cluster 3	Clustered	3	TPM2	4.66667	0	3	0	0.887086	FALSE	0	TPM2	0	0.666667
3.08955	0.0158911	0.323671	0.666667	4	5	FALSE	Cluster 3	Clustered	3	TPM1	6	0	4	0	0.90915	FALSE	0	TPM1	278	0.4
3.49254	0.0397031	0.286325	0.3	5	6	FALSE	Cluster 3	Clustered	3	CALD1	3.2	0	5	0	0.891629	FALSE	0	CALD1	468	0.4
2.97015	0.00945283	0.336683	0.6	5	5	FALSE	Cluster 3	Clustered	2.7	CLDN4	8.8	0	5	0	0.914341	FALSE	0	CLDN4	226	0.352
2.74627	0.0145674	0.36413	0.428571	7	5	FALSE		Unclustered	2.14286	COL7A1	11.8571	0	7	0	0.924075	FALSE	0	COL7A1	282	0.37788
2.16418	0.213967	0.462069	0.305556	9	4	FALSE		Unclustered	2.14286	SNAI2	11.1111	0	9	0	0.949384	FALSE	0	SNAI2	2146	0.234043
4.58209	0	0.218241	1	2	7	FALSE	Cluster 4	Seed	2	PER1	3.5	0	2	0	0.844257	FALSE	0	PER1	0	0.875
2.95522	0.0806724	0.338384	0.1	5	5	FALSE	Cluster 6	Clustered	2	S100A2	3.6	0	5	0	0.91499	FALSE	0	S100A2	522	0.230769
4.58209	0	0.218241	1	2	7	FALSE	Cluster 4	Clustered	2	HLF	3.5	0	2	0	0.844257	FALSE	0	HLF	0	0.875
2.70149	0.0293932	0.370166	0.333333	3	5	FALSE	Cluster 6	Clustered	2	KRT17	11.6667	0	3	0	0.926022	FALSE	0	KRT17	256	0.377778
3.02985	0	0.330049	1	2	5	FALSE		Unclustered	2	IGFBP5	19.5	0	2	0	0.911746	FALSE	0	IGFBP5	0	0.8125
1.33333	0	0.75	1	2	2	FALSE	Cluster 5	Seed	2	EEF1B2	3	0	2	0	0.888889	FALSE	0	EEF1B2	0	1
1.33333	0	0.75	1	2	2	FALSE	Cluster 5	Clustered	2	DAPL1	3	0	2	0	0.888889	FALSE	0	DAPL1	0	1
3.25373	0.0373927	0.307339	0.166667	4	5	FALSE		Unclustered	2	ELF3	4.5	0	4	0	0.902012	FALSE	0	ELF3	556	0.4
2.8806	0.00153198	0.34715	0.333333	3	5	FALSE		Unclustered	2	CD55	15.3333	0	3	0	0.918235	FALSE	0	CD55	60	0.555556
2.55224	0.110693	0.391813	0.047619	7	5	FALSE	Cluster 6	Clustered	2	KRT14	6.14286	0	7	0	0.932511	FALSE	0	KRT14	1012	0.187192
2.97015	0.00322139	0.336683	0.166667	4	5	FALSE		Unclustered	2	CLU	11.25	0	4	0	0.914341	FALSE	0	CLU	66	0.447917
2.91045	0.00149452	0.34359	0.333333	3	5	FALSE		Unclustered	2	B2M	13.3333	0	3	0	0.916937	FALSE	0	B2M	54	0.52
3.22388	0.0107589	0.310185	0.333333	3	5	FALSE		Unclustered	2	RBP1	6.66667	0	3	0	0.90331	FALSE	0	RBP1	190	0.395833
3.65672	0.0298507	0.273469	0.333333	3	6	FALSE		Unclustered	2	CYP26B1	2.66667	0	3	0	0.884491	FALSE	0	CYP26B1	376	0.466667
2.55224	0.0199813	0.391813	0.52381	7	4	FALSE		Unclustered	1.92857	CLDN1	10.1429	0	7	0	0.932511	FALSE	0	CLDN1	406	0.298319
3.61194	0.0870647	0.27686	0.333333	4	6	FALSE	Cluster 4	Clustered	1.66667	PER2	3.25	0	4	0	0.886437	FALSE	0	PER2	644	0.375
4.56716	0.000226142	0.218954	0.666667	3	7	FALSE	Cluster 4	Clustered	1.66667	PER3	2.66667	0	3	0	0.844906	FALSE	0	PER3	2	0.666667
1	0.166667	1	0.666667	3	1	FALSE	Cluster 5	Clustered	1.66667	RPL28	2.33333	0	3	0	1	FALSE	0	RPL28	2	0.777778
1	0.166667	1	0.666667	3	1	FALSE	Cluster 5	Clustered	1.66667	RPS16	2.33333	0	3	0	1	FALSE	0	RPS16	2	0.777778
2.73134	0.0554616	0.36612	0.333333	4	5	FALSE		Unclustered	1.2	ALDH1A1	9.5	0	4	0	0.924724	FALSE	0	ALDH1A1	646	0.339286
3.49254	0.00995025	0.286325	0	2	5	FALSE		Unclustered	0.666667	RB1	4.5	0	2	0	0.891629	FALSE	0	RB1	44	0.5
3.29851	0.00783959	0.303167	0	2	5	FALSE		Unclustered	0.666667	LYPD3	6	0	2	0	0.900065	FALSE	0	LYPD3	56	0.5
3.34328	0.00618122	0.299107	0	2	5	FALSE		Unclustered	0.666667	DSG1	5	0	2	0	0.898118	FALSE	0	DSG1	32	0.5
3.67164	0.0298507	0.272358	0	2	6	FALSE		Unclustered	0.666667	SGK1	3.5	0	2	0	0.883842	FALSE	0	SGK1	218	0.5
3	0.0423925	0.333333	0	3	5	FALSE		Unclustered	0.5	PAX6	4.66667	0	3	0	0.913043	FALSE	0	PAX6	422	0.333333
3.07463	0.0365526	0.325243	0	3	5	FALSE		Unclustered	0.5	HSPB1	4.66667	0	3	0	0.909799	FALSE	0	HSPB1	324	0.333333
3.80597	0.00947463	0.262745	0	3	6	FALSE		Unclustered	0.5	KRT7	4.66667	0	3	0	0.878001	FALSE	0	KRT7	80	0.407407
2.71642	0.221515	0.368132	0	6	5	FALSE		Unclustered	0.285714	MDM2	3.83333	0	6	0	0.925373	FALSE	0	MDM2	1720	0.166667
3.9403	0	0.253788	0	1	6	FALSE		Unclustered	0	S100A14	5	0	1	0	0.872161	FALSE	0	S100A14	0	0
3.9403	0	0.253788	0	1	6	FALSE		Unclustered	0	S100A13	5	0	1	0	0.872161	FALSE	0	S100A13	0	0
3.70149	0	0.270161	0	1	6	FALSE		Unclustered	0	TP53I3	6	0	1	0	0.882544	FALSE	0	TP53I3	0	0
3.53731	0	0.2827	0	1	6	FALSE		Unclustered	0	KRT3	7	0	1	0	0.889682	FALSE	0	KRT3	0	0
3.98507	0	0.250936	0	1	6	FALSE		Unclustered	0	KRT12	3	0	1	0	0.870214	FALSE	0	KRT12	0	0
4.0597	0	0.246324	0	1	6	FALSE		Unclustered	0	HSPH1	3	0	1	0	0.86697	FALSE	0	HSPH1	0	0
3.0597	0	0.326829	0	1	5	FALSE		Unclustered	0	LMO7	23	0	1	0	0.910448	FALSE	0	LMO7	0	0
3.0597	0	0.326829	0	1	5	FALSE		Unclustered	0	SERPINE2	23	0	1	0	0.910448	FALSE	0	SERPINE2	0	0
3.0597	0	0.326829	0	1	5	FALSE		Unclustered	0	GLUL	23	0	1	0	0.910448	FALSE	0	GLUL	0	0
4.23881	0	0.235915	0	1	6	FALSE		Unclustered	0	SPTBN1	4	0	1	0	0.859182	FALSE	0	SPTBN1	0	0
4.64179	0	0.215434	0	1	7	FALSE		Unclustered	0	CYP1B1	3	0	1	0	0.841661	FALSE	0	CYP1B1	0	0
3.67164	0	0.272358	0	1	6	FALSE		Unclustered	0	CEBPD	6	0	1	0	0.883842	FALSE	0	CEBPD	0	0
2.98507	0	0.335	0	1	5	FALSE		Unclustered	0	GPNMB	23	0	1	0	0.913692	FALSE	0	GPNMB	0	0
3.67164	0	0.272358	0	1	6	FALSE		Unclustered	0	CBR1	6	0	1	0	0.883842	FALSE	0	CBR1	0	0
4.47761	0	0.223333	0	1	7	FALSE		Unclustered	0	PALLD	5	0	1	0	0.848799	FALSE	0	PALLD	0	0
4.65672	0	0.214744	0	1	7	FALSE		Unclustered	0	BTG2	2	0	1	0	0.841012	FALSE	0	BTG2	0	0
