# Supplementary material for: Long-read single-cell RNA sequencing analysis of key genes and isoforms during corneal wound healing in cynomolgus monkeys
Source: Research Square preprint supplement (doi:10.21203/rs.3.rs-5232061/v1), 2025-03-05
Supplement: Supplementary file 5 [file Supplementary Data12_GO and KEGG analysis of LSC and BC function gene.xlsx]

## Sheet: LSC
GO analysis of LSC function gene												KEGG analysis of LSC function gene
ONTOLOGY	ID	Description	GeneRatio	BgRatio	pvalue	p.adjust	qvalue	geneID	Count	celltype		ID	Description	GeneRatio	BgRatio	pvalue	p.adjust	qvalue	geneID	Count
BP	GO:0007229	integrin-mediated signaling pathway	8/64	51/9280	1.64386e-09	2.06962e-06	1.71827e-06	PTN/ITGAV/ITGB6/ITGB4/ITGB1/TIMP1/ITGA3/FN1	8	LSC		mcf04510	Focal adhesion - Macaca fascicularis (crab-eating macaque)	14/67	212/9213	2.54e-10	1.89e-08	1.52e-08	102116249/102122296/102130245/102122005/102116676/102120952/102132595/102128796/101865646/102144610/102138509/102126233/102123329/102119232	14
BP	GO:0048646	anatomical structure formation involved in morphogenesis	16/64	457/9280	5.04921e-08	3.17848e-05	2.63888e-05	CCN1/ITGAV/TGM2/THBS1/MEIS1/SPARC/GLUL/ITGB4/COL5A2/JUP/CYP1B1/CLIC4/PERP/DCN/ITGA3/FN1	16	LSC		mcf05165	Human papillomavirus infection - Macaca fascicularis (crab-eating macaque)	13/67	353/9213	1.2e-06	2.97e-05	2.39e-05	102116249/102122296/102130245/102116676/102120952/102132595/102128796/102144610/102146862/102126233/102143028/102123329/102119232	13
BP	GO:0030334	regulation of cell migration	14/64	353/9280	8.72593e-08	3.66198e-05	3.0403e-05	PTN/CCN1/ITGAV/THBS1/SPARC/GLUL/LAMC2/LAMA3/JUP/CYP1B1/TIMP1/CLIC4/DCN/FN1	14	LSC		mcf04512	ECM-receptor interaction - Macaca fascicularis (crab-eating macaque)	12/67	89/9213	1.2e-12	1.79e-10	1.44e-10	102116249/102122296/102130245/101867504/102116676/102120952/102132595/102128796/102144610/102126233/102123329/102119232	12
BP	GO:0001667	ameboidal-type cell migration	10/64	170/9280	2.10761e-07	5.30695e-05	4.40601e-05	THBS1/SPARC/GLUL/S100A2/ITGB4/JUP/CYP1B1/TIMP1/DCN/FN1	10	LSC		mcf04151	PI3K-Akt signaling pathway - Macaca fascicularis (crab-eating macaque)	12/67	382/9213	1.65e-05	0.000245825	0.00019798	102116249/102122296/102130245/102116676/102120952/102132595/102128796/102144610/101866184/102126233/102123329/102119232	12
BP	GO:0040012	regulation of locomotion	14/64	397/9280	3.70321e-07	7.3197e-05	6.07706e-05	PTN/CCN1/ITGAV/THBS1/SPARC/GLUL/LAMC2/LAMA3/JUP/CYP1B1/TIMP1/CLIC4/DCN/FN1	14	LSC		mcf05205	Proteoglycans in cancer - Macaca fascicularis (crab-eating macaque)	11/67	214/9213	3.37e-07	1.01e-05	8.1e-06	102116249/102130245/101867504/102122005/102138949/102142988/101865646/102144610/102138509/101866144/102119232	11
BP	GO:0018149	peptide cross-linking	5/64	23/9280	4.06973e-07	7.3197e-05	6.07706e-05	DSP/TGM2/THBS1/DCN/FN1	5	LSC		mcf05222	Small cell lung cancer - Macaca fascicularis (crab-eating macaque)	10/67	104/9213	3.15e-09	1.56e-07	1.26e-07	102116249/102116676/102120952/102128796/101866825/102144610/102126233/102143028/102123329/102119232	10
BP	GO:0001525	angiogenesis	10/64	202/9280	1.04046e-06	0.000163742	0.000135944	CCN1/ITGAV/THBS1/MEIS1/SPARC/GLUL/JUP/CYP1B1/CLIC4/DCN	10	LSC		mcf04810	Regulation of actin cytoskeleton - Macaca fascicularis (crab-eating macaque)	9/67	242/9213	5.81e-05	0.000721328	0.000580935	102116249/102122296/102117220/101926790/102132595/102142988/102144610/102123329/102119232	9
BP	GO:0007160	cell-matrix adhesion	7/64	90/9280	2.52793e-06	0.000318267	0.000264235	ITGAV/ITGB6/THBS1/ITGB4/JUP/ITGB1/FN1	7	LSC		mcf05412	Arrhythmogenic right ventricular cardiomyopathy - Macaca fascicularis (crab-eating macaque)	8/67	78/9213	7.99e-08	2.97e-06	2.4e-06	102145051/102116249/102122296/102132595/102136550/102130569/102144610/102123329	8
BP	GO:0034113	heterotypic cell-cell adhesion	4/64	20/9280	9.17506e-06	0.00088857	0.00073772	DSP/ITGAV/JUP/PERP	4	LSC		mcf05206	MicroRNAs in cancer - Macaca fascicularis (crab-eating macaque)	8/67	163/9213	2.17e-05	0.000294292	0.000237014	102139983/102130245/101867504/102138949/101864882/102146810/101864871/102143028	8
BP	GO:0090132	epithelium migration	7/64	120/9280	1.71196e-05	0.00131075	0.00108823	THBS1/SPARC/GLUL/S100A2/JUP/CYP1B1/DCN	7	LSC		mcf05410	Hypertrophic cardiomyopathy - Macaca fascicularis (crab-eating macaque)	7/67	103/9213	8.92e-06	0.000188717	0.000151987	102116249/102122296/102132595/101864882/102144610/102141630/102123329	7
BP	GO:0090287	regulation of cellular response to growth factor stimulus	7/64	126/9280	2.35241e-05	0.00148084	0.00122944	CCN1/TOB1/THBS1/SULF2/CDKN2B/DCN/ITGA3	7	LSC		mcf05414	Dilated cardiomyopathy - Macaca fascicularis (crab-eating macaque)	7/67	105/9213	1.01e-05	0.000188717	0.000151987	102116249/102122296/102132595/101864882/102144610/102141630/102123329	7
BP	GO:0001704	formation of primary germ layer	5/64	52/9280	2.69519e-05	0.00154238	0.00128054	ITGAV/ITGB4/COL5A2/ITGA3/FN1	5	LSC		mcf05146	Amoebiasis - Macaca fascicularis (crab-eating macaque)	7/67	110/9213	1.38e-05	0.000227918	0.000183558	102126138/102116676/102120952/102128796/101865323/102126233/102119232	7
BP	GO:0043588	skin development	6/64	109/9280	9.86139e-05	0.00517312	0.0042949	DSP/ITGB4/COL5A2/JUP/CLIC4/ITGA3	6	LSC		mcf05145	Toxoplasmosis - Macaca fascicularis (crab-eating macaque)	6/67	120/9213	0.000224849	0.00257712	0.00207553	102116676/102124789/102120952/102128796/102144610/102126233	6
BP	GO:0043277	apoptotic cell clearance	3/64	15/9280	0.000134181	0.00603335	0.00500908	ITGAV/TGM2/THBS1	3	LSC		mcf05100	Bacterial invasion of epithelial cells - Macaca fascicularis (crab-eating macaque)	5/67	82/9213	0.000309611	0.00329514	0.00265381	102122005/101926790/101865646/102144610/102119232	5
BP	GO:0022612	gland morphogenesis	4/64	49/9280	0.000345394	0.0120792	0.0100286	PTN/TGM2/SULF2/ELF3	4	LSC		mcf04148	Efferocytosis - Macaca fascicularis (crab-eating macaque)	5/67	162/9213	0.00634798	0.0491983	0.0396228	102116249/102130245/101866184/102144217/102143028	5
BP	GO:0001937	negative regulation of endothelial cell proliferation	3/64	22/9280	0.000438759	0.0138471	0.0114963	THBS1/SPARC/ATP5IF1	3	LSC		mcf05415	Diabetic cardiomyopathy - Macaca fascicularis (crab-eating macaque)	5/67	278/9213	0.0511835	0.211843	0.170612	102119570/102122883/102124789/102141145/102144217	5
BP	GO:0045216	cell-cell junction organization	4/64	59/9280	0.000704668	0.0197151	0.0163681	DSP/JUP/GJB2/PERP	4	LSC		mcf05020	Prion disease - Macaca fascicularis (crab-eating macaque)	5/67	360/9213	0.120424	0.363443	0.292706	102119570/102122005/102122883/102124789/101865646	5
BP	GO:0030155	regulation of cell adhesion	8/64	293/9280	0.000854479	0.0228891	0.0190033	CCN1/ITGAV/TGM2/THBS1/LAMA3/JUP/CYP1B1/FN1	8	LSC		mcf05010	Alzheimer disease - Macaca fascicularis (crab-eating macaque)	5/67	471/9213	0.257188	0.517851	0.417061	102119570/102122883/102124789/102141145/102143028	5
BP	GO:0090092	regulation of transmembrane receptor protein serine/threonine kinase signaling pathway	5/64	110/9280	0.000934019	0.0244985	0.0203395	CCN1/TOB1/THBS1/CDKN2B/ITGA3	5	LSC		mcf04976	Bile secretion - Macaca fascicularis (crab-eating macaque)	4/67	84/9213	0.0031863	0.027927	0.0224915	102124503/101866484/102144217/101866067	4
BP	GO:0030198	extracellular matrix organization	5/64	118/9280	0.00128006	0.0304075	0.0252453	CCN1/SULF2/COL5A2/CYP1B1/ELF3	5	LSC		mcf04657	IL-17 signaling pathway - Macaca fascicularis (crab-eating macaque)	4/67	99/9213	0.00573149	0.047444	0.0382099	102119199/102126138/102142258/102143028	4
BP	GO:0043062	extracellular structure organization	5/64	118/9280	0.00128006	0.0304075	0.0252453	CCN1/SULF2/COL5A2/CYP1B1/ELF3	5	LSC		mcf04974	Protein digestion and absorption - Macaca fascicularis (crab-eating macaque)	4/67	105/9213	0.00704599	0.049993	0.0402628	102124503/102132120/102126265/101866484	4
BP	GO:0045229	external encapsulating structure organization	5/64	118/9280	0.00128006	0.0304075	0.0252453	CCN1/SULF2/COL5A2/CYP1B1/ELF3	5	LSC		mcf04260	Cardiac muscle contraction - Macaca fascicularis (crab-eating macaque)	4/67	117/9213	0.0102427	0.0693708	0.0558691	102124503/101864882/102141630/101866484	4
BP	GO:0009611	response to wounding	6/64	178/9280	0.0013655	0.0312576	0.0259511	CCN1/THBS1/SULF2/ITGB4/TIMP1/FN1	6	LSC		mcf04919	Thyroid hormone signaling pathway - Macaca fascicularis (crab-eating macaque)	4/67	128/9213	0.0138913	0.0899915	0.0724764	102116249/102124503/101866484/102144217	4
BP	GO:0071495	cellular response to endogenous stimulus	10/64	478/9280	0.00147552	0.0331729	0.0275413	CCN1/TOB1/TGM2/THBS1/SULF2/COL5A2/JUP/CDKN2B/ITGA3/CA2	10	LSC		mcf05135	Yersinia infection - Macaca fascicularis (crab-eating macaque)	4/67	145/9213	0.0209973	0.120331	0.0969108	101926790/102146326/102144610/102119232	4
BP	GO:0007492	endoderm development	3/64	34/9280	0.00160728	0.0355011	0.0294742	ITGAV/COL5A2/FN1	3	LSC		mcf04261	Adrenergic signaling in cardiomyocytes - Macaca fascicularis (crab-eating macaque)	4/67	159/9213	0.0282712	0.150443	0.121162	102124503/101864882/102141630/101866484	4
BP	GO:0050673	epithelial cell proliferation	6/64	185/9280	0.00166329	0.0361049	0.0299755	PTN/THBS1/SPARC/SULF2/ATP5IF1/CDKN2B	6	LSC		mcf04145	Phagosome - Macaca fascicularis (crab-eating macaque)	4/67	174/9213	0.0375509	0.180487	0.145359	102116249/102130245/101867227/102144610	4
BP	GO:0000289	nuclear-transcribed mRNA poly(A) tail shortening	2/64	10/9280	0.00203328	0.0387864	0.0322017	TOB1/BTG2	2	LSC		mcf04530	Tight junction - Macaca fascicularis (crab-eating macaque)	4/67	179/9213	0.0409917	0.184973	0.148971	102117220/101926790/102142988/102144610	4
BP	GO:0040037	negative regulation of fibroblast growth factor receptor signaling pathway	2/64	10/9280	0.00203328	0.0387864	0.0322017	THBS1/SULF2	2	LSC		mcf05208	Chemical carcinogenesis - reactive oxygen species - Macaca fascicularis (crab-eating macaque)	4/67	303/9213	0.178073	0.427949	0.344657	102119570/102122883/102124789/102146810	4
BP	GO:0070141	response to UV-A	2/64	10/9280	0.00203328	0.0387864	0.0322017	TIMP1/MMP1	2	LSC		mcf05016	Huntington disease - Macaca fascicularis (crab-eating macaque)	4/67	396/9213	0.325099	0.576664	0.464427	102122746/102119570/102122883/102124789	4
BP	GO:0086004	regulation of cardiac muscle cell contraction	2/64	10/9280	0.00203328	0.0387864	0.0322017	DSP/JUP	2	LSC		mcf04964	Proximal tubule bicarbonate reclamation - Macaca fascicularis (crab-eating macaque)	3/67	23/9213	0.000586701	0.0058279	0.00469361	102124503/101866484/101866067	3
BP	GO:0090136	epithelial cell-cell adhesion	2/64	10/9280	0.00203328	0.0387864	0.0322017	DSP/CYP1B1	2	LSC		mcf04960	Aldosterone-regulated sodium reabsorption - Macaca fascicularis (crab-eating macaque)	3/67	37/9213	0.00239374	0.0222917	0.017953	102124503/101866184/101866484	3
BP	GO:0070848	response to growth factor	7/64	270/9280	0.00245988	0.0438716	0.0364236	CCN1/TOB1/THBS1/SULF2/CDKN2B/DCN/ITGA3	7	LSC		mcf04971	Gastric acid secretion - Macaca fascicularis (crab-eating macaque)	3/67	78/9213	0.0189784	0.113111	0.0910962	102124503/101866484/101866067	3
BP	GO:0042572	retinol metabolic process	2/64	11/9280	0.00247409	0.0438716	0.0364236	CYP1B1/RBP1	2	LSC		mcf04911	Insulin secretion - Macaca fascicularis (crab-eating macaque)	3/67	87/9213	0.0252541	0.139365	0.112241	102124503/101866484/102144217	3
BP	GO:0061450	trophoblast cell migration	2/64	11/9280	0.00247409	0.0438716	0.0364236	ITGB4/TIMP1	2	LSC		mcf04640	Hematopoietic cell lineage - Macaca fascicularis (crab-eating macaque)	3/67	100/9213	0.0360595	0.179096	0.144238	101867504/102143442/102123329	3
BP	GO:1903115	regulation of actin filament-based movement	2/64	11/9280	0.00247409	0.0438716	0.0364236	DSP/JUP	2	LSC		mcf04972	Pancreatic secretion - Macaca fascicularis (crab-eating macaque)	3/67	105/9213	0.0407566	0.184973	0.148971	102124503/101866484/101866067	3
BP	GO:0010575	positive regulation of vascular endothelial growth factor production	2/64	12/9280	0.00295574	0.0478571	0.0397325	SULF2/CYP1B1	2	LSC		mcf04350	TGF-beta signaling pathway - Macaca fascicularis (crab-eating macaque)	3/67	113/9213	0.0488835	0.208104	0.167601	102130245/101866825/101866144	3
BP	GO:0086065	cell communication involved in cardiac conduction	2/64	12/9280	0.00295574	0.0478571	0.0397325	DSP/JUP	2	LSC		mcf04066	HIF-1 signaling pathway - Macaca fascicularis (crab-eating macaque)	3/67	125/9213	0.0624418	0.23856	0.192129	102141145/102144412/102144217	3
BP	GO:0086091	regulation of heart rate by cardiac conduction	2/64	12/9280	0.00295574	0.0478571	0.0397325	DSP/JUP	2	LSC		mcf04068	FoxO signaling pathway - Macaca fascicularis (crab-eating macaque)	3/67	131/9213	0.0698122	0.255997	0.206172	101866825/102116967/101866184	3
BP	GO:0007565	female pregnancy	3/64	42/9280	0.00296494	0.0478571	0.0397325	PTN/ITGB4/TIMP1	3	LSC		mcf05418	Fluid shear stress and atherosclerosis - Macaca fascicularis (crab-eating macaque)	3/67	160/9213	0.110489	0.350273	0.282099	102116249/102122005/101865646	3
BP	GO:0051093	negative regulation of developmental process	8/64	358/9280	0.00303933	0.0484369	0.0402139	PTN/TOB1/ITGAV/THBS1/MEIS1/SPARC/COL5A2/DCN	8	LSC		mcf04022	cGMP-PKG signaling pathway - Macaca fascicularis (crab-eating macaque)	3/67	165/9213	0.118268	0.363443	0.292706	102124503/102124789/101866484	3
CC	GO:0008305	integrin complex	5/72	18/10372	1.1183e-07	1.45379e-05	1.09475e-05	ITGAV/ITGB6/ITGB4/ITGB1/ITGA3	5	LSC		mcf04814	Motor proteins - Macaca fascicularis (crab-eating macaque)	3/67	209/9213	0.194287	0.452324	0.364288	102117220/101864882/102141630	3
CC	GO:0030312	external encapsulating structure	9/72	139/10372	4.47388e-07	1.93868e-05	1.4599e-05	TGM2/THBS1/SPARC/LAMC2/ITGB4/COL5A2/TIMP1/MMP1/FN1	9	LSC		mcf05169	Epstein-Barr virus infection - Macaca fascicularis (crab-eating macaque)	3/67	223/9213	0.220658	0.469686	0.378271	101867504/101864871/102146862	3
CC	GO:0031012	extracellular matrix	9/72	139/10372	4.47388e-07	1.93868e-05	1.4599e-05	TGM2/THBS1/SPARC/LAMC2/ITGB4/COL5A2/TIMP1/MMP1/FN1	9	LSC		mcf04144	Endocytosis - Macaca fascicularis (crab-eating macaque)	3/67	259/9213	0.29122	0.544942	0.438879	102122005/101926790/101865646	3
CC	GO:0098636	protein complex involved in cell adhesion	5/72	26/10372	8.22304e-07	2.67249e-05	2.01248e-05	ITGAV/ITGB6/ITGB4/ITGB1/ITGA3	5	LSC		mcf05132	Salmonella infection - Macaca fascicularis (crab-eating macaque)	3/67	284/9213	0.341295	0.598269	0.481828	101926790/102141145/102138509	3
CC	GO:0009986	cell surface	9/72	274/10372	0.000108942	0.00202321	0.00152355	ITGAV/THBS1/SPARC/SULF2/ITGB4/ATP5IF1/ITGB1/CLIC4/ITGA3	9	LSC		mcf05012	Parkinson disease - Macaca fascicularis (crab-eating macaque)	3/67	369/9213	0.506351	0.673624	0.542516	102119570/102122883/102124789	3
CC	GO:0001533	cornified envelope	3/72	16/10372	0.000168349	0.00273567	0.00206006	DSP/JUP/DSC2	3	LSC		mcf00910	Nitrogen metabolism - Macaca fascicularis (crab-eating macaque)	2/67	17/9213	0.0066038	0.0491983	0.0396228	101926704/101866067	2
CC	GO:0070161	anchoring junction	10/72	380/10372	0.000272982	0.00354877	0.00267235	DSP/ITGAV/ITGB6/ITGB4/JUP/DSC2/ITGB1/TNS4/CLIC4/GJB2	10	LSC		mcf04950	Maturity onset diabetes of the young - Macaca fascicularis (crab-eating macaque)	2/67	26/9213	0.0151317	0.0939427	0.0756585	101925834/102146862	2
CC	GO:0005902	microvillus	3/72	28/10372	0.000927723	0.0100503	0.00756827	ITGAV/CD44/CLIC4	3	LSC		mcf05219	Bladder cancer - Macaca fascicularis (crab-eating macaque)	2/67	41/9213	0.035612	0.179096	0.144238	102130245/102142258	2
CC	GO:0005882	intermediate filament	4/72	79/10372	0.0021664	0.0201166	0.0151485	DSP/JUP/VIM/KRT7	4	LSC		mcf04973	Carbohydrate digestion and absorption - Macaca fascicularis (crab-eating macaque)	2/67	45/9213	0.0422085	0.184973	0.148971	102124503/101866484	2
CC	GO:0031091	platelet alpha granule	2/72	11/10372	0.00251001	0.0213234	0.0160573	THBS1/SPARC	2	LSC		mcf04913	Ovarian steroidogenesis - Macaca fascicularis (crab-eating macaque)	2/67	53/9213	0.0566282	0.222042	0.178826	102146810/102143028	2
CC	GO:0016363	nuclear matrix	3/72	40/10372	0.00263613	0.0213234	0.0160573	SPARC/VIM/CLIC4	3	LSC		mcf04961	Endocrine and other factor-regulated calcium reabsorption - Macaca fascicularis (crab-eating macaque)	2/67	53/9213	0.0566282	0.222042	0.178826	102124503/101866484	2
CC	GO:0031226	intrinsic component of plasma membrane	9/72	430/10372	0.00278895	0.0213234	0.0160573	ITGAV/ITGB6/TGM2/ITGB4/ITGB1/GJB2/PERP/ATP1B1/ITGA3	9	LSC		mcf04370	VEGF signaling pathway - Macaca fascicularis (crab-eating macaque)	2/67	60/9213	0.0704421	0.255997	0.206172	101865323/102143028	2
CC	GO:0043235	receptor complex	5/72	146/10372	0.00338779	0.0225186	0.0169573	ITGAV/ITGB6/ITGB4/ITGB1/ITGA3	5	LSC		mcf05204	Chemical carcinogenesis - DNA adducts - Macaca fascicularis (crab-eating macaque)	2/67	68/9213	0.0874111	0.310101	0.249746	102146810/102143028	2
MF	GO:0050839	cell adhesion molecule binding	8/70	82/9563	1.26751e-07	2.58571e-05	2.42828e-05	PTN/CCN1/DSP/ITGAV/ITGB6/THBS1/JUP/FN1	8	LSC		mcf04978	Mineral absorption - Macaca fascicularis (crab-eating macaque)	2/67	74/9213	0.100856	0.349188	0.281225	102124503/101866484	2
MF	GO:0005178	integrin binding	6/70	41/9563	4.54478e-07	4.63568e-05	4.35342e-05	PTN/CCN1/ITGAV/ITGB6/THBS1/FN1	6	LSC		mcf04918	Thyroid hormone synthesis - Macaca fascicularis (crab-eating macaque)	2/67	76/9213	0.105459	0.349188	0.281225	102124503/101866484	2
MF	GO:0044877	protein-containing complex binding	14/70	432/9563	2.26429e-06	0.000153972	0.000144597	PTN/CCN1/ITGAV/ITGB6/THBS1/DSTN/MYH9/SPARC/LGALS3/TAGLN/ATP5IF1/FLNA/DCN/FN1	14	LSC		mcf05416	Viral myocarditis - Macaca fascicularis (crab-eating macaque)	2/67	76/9213	0.105459	0.349188	0.281225	101865646/102143442	2
MF	GO:0050840	extracellular matrix binding	4/70	19/9563	9.39214e-06	0.000478999	0.000449834	CCN1/ITGAV/THBS1/DCN	4	LSC		mcf05134	Legionellosis - Macaca fascicularis (crab-eating macaque)	2/67	78/9213	0.110119	0.350273	0.282099	102126138/102116967	2
MF	GO:0003779	actin binding	9/70	219/9563	2.84279e-05	0.00115986	0.00108924	DSTN/MYH9/ARPC1B/MSN/TAGLN/TPM1/TPM2/CALD1/FLNA	9	LSC		mcf03018	RNA degradation - Macaca fascicularis (crab-eating macaque)	2/67	85/9213	0.126839	0.363443	0.292706	102120173/102141340	2
MF	GO:0005509	calcium ion binding	11/70	392/9563	0.00011669	0.00396746	0.00372589	TGM2/THBS1/SPARC/S100A14/S100A2/SULF2/S100A6/DSC2/SRI/S100A4/GJB2	11	LSC		mcf04115	p53 signaling pathway - Macaca fascicularis (crab-eating macaque)	2/67	85/9213	0.126839	0.363443	0.292706	102130245/101865419	2
MF	GO:0005539	glycosaminoglycan binding	5/70	92/9563	0.000546175	0.0159171	0.0149479	PTN/THBS1/CD44/DCN/FN1	5	LSC		mcf05140	Leishmaniasis - Macaca fascicularis (crab-eating macaque)	2/67	85/9213	0.126839	0.363443	0.292706	102144610/102143028	2
MF	GO:0019838	growth factor binding	4/70	60/9563	0.000942701	0.0240389	0.0225752	ITGAV/THBS1/IGFBP2/ITGB4	4	LSC		mcf01230	Biosynthesis of amino acids - Macaca fascicularis (crab-eating macaque)	2/67	87/9213	0.131723	0.370316	0.298241	101926704/102141145	2
MF	GO:0005080	protein kinase C binding	2/70	10/9563	0.00228841	0.0424396	0.0398556	DSP/ITGAV	2	LSC		mcf04970	Salivary secretion - Macaca fascicularis (crab-eating macaque)	2/67	90/9213	0.13913	0.383895	0.309177	102124503/101866484	2
MF	GO:0001968	fibronectin binding	2/70	11/9563	0.00278374	0.0473236	0.0444422	ITGAV/THBS1	2	LSC		mcf04727	GABAergic synapse - Macaca fascicularis (crab-eating macaque)	2/67	93/9213	0.146626	0.395125	0.318222	101926704/102129445	2
												mcf04061	Viral protein interaction with cytokine and cytokine receptor - Macaca fascicularis (crab-eating macaque)	2/67	100/9213	0.164428	0.427949	0.344657	101925898/102126138	2
												mcf04925	Aldosterone synthesis and secretion - Macaca fascicularis (crab-eating macaque)	2/67	101/9213	0.167003	0.427949	0.344657	102124503/101866484	2
												mcf04666	Fc gamma R-mediated phagocytosis - Macaca fascicularis (crab-eating macaque)	2/67	104/9213	0.174769	0.427949	0.344657	102139983/101926790	2
												mcf04064	NF-kappa B signaling pathway - Macaca fascicularis (crab-eating macaque)	2/67	105/9213	0.177371	0.427949	0.344657	102126138/102143028	2
												mcf05323	Rheumatoid arthritis - Macaca fascicularis (crab-eating macaque)	2/67	105/9213	0.177371	0.427949	0.344657	102126138/102142258	2
												mcf04931	Insulin resistance - Macaca fascicularis (crab-eating macaque)	2/67	109/9213	0.187841	0.444258	0.357792	102144832/102144217	2
												mcf04668	TNF signaling pathway - Macaca fascicularis (crab-eating macaque)	2/67	115/9213	0.203702	0.466948	0.376065	102126138/102143028	2
												mcf04922	Glucagon signaling pathway - Macaca fascicularis (crab-eating macaque)	2/67	118/9213	0.211692	0.469686	0.378271	102144832/102144217	2
												mcf04670	Leukocyte transendothelial migration - Macaca fascicularis (crab-eating macaque)	2/67	120/9213	0.217036	0.469686	0.378271	102142988/102144610	2
												mcf04270	Vascular smooth muscle contraction - Macaca fascicularis (crab-eating macaque)	2/67	139/9213	0.26825	0.532924	0.4292	102117220/101866069	2
												mcf04550	Signaling pathways regulating pluripotency of stem cells - Macaca fascicularis (crab-eating macaque)	2/67	143/9213	0.279071	0.544942	0.438879	102145310/101925834	2
												mcf05226	Gastric cancer - Macaca fascicularis (crab-eating macaque)	2/67	148/9213	0.292586	0.544942	0.438879	102136550/101866825	2
												mcf04514	Cell adhesion molecules - Macaca fascicularis (crab-eating macaque)	2/67	158/9213	0.319517	0.576664	0.464427	102116249/102144610	2
												mcf04723	Retrograde endocannabinoid signaling - Macaca fascicularis (crab-eating macaque)	2/67	178/9213	0.372592	0.628963	0.506548	102122883/102143028	2
												mcf04140	Autophagy - animal - Macaca fascicularis (crab-eating macaque)	2/67	186/9213	0.393397	0.628963	0.506548	101867227/102116967	2
												mcf04360	Axon guidance - Macaca fascicularis (crab-eating macaque)	2/67	186/9213	0.393397	0.628963	0.506548	102144069/102144610	2
												mcf04062	Chemokine signaling pathway - Macaca fascicularis (crab-eating macaque)	2/67	198/9213	0.424025	0.644691	0.519214	101925898/102126138	2
												mcf04217	Necroptosis - Macaca fascicularis (crab-eating macaque)	2/67	208/9213	0.448951	0.653616	0.526402	102144832/101926704	2
												mcf05202	Transcriptional misregulation in cancer - Macaca fascicularis (crab-eating macaque)	2/67	216/9213	0.468464	0.662981	0.533944	102145310/102136550	2
												mcf05167	Kaposi sarcoma-associated herpesvirus infection - Macaca fascicularis (crab-eating macaque)	2/67	221/9213	0.480457	0.669047	0.53883	102126138/102143028	2
												mcf04015	Rap1 signaling pathway - Macaca fascicularis (crab-eating macaque)	2/67	223/9213	0.485208	0.669408	0.53912	102130245/102144610	2
												mcf04024	cAMP signaling pathway - Macaca fascicularis (crab-eating macaque)	2/67	228/9213	0.496973	0.673624	0.542516	102124503/101866484	2
												mcf05166	Human T-cell leukemia virus 1 infection - Macaca fascicularis (crab-eating macaque)	2/67	233/9213	0.50857	0.673624	0.542516	101866825/102144217	2
												mcf00190	Oxidative phosphorylation - Macaca fascicularis (crab-eating macaque)	2/67	234/9213	0.510869	0.673624	0.542516	102119570/102122883	2
												mcf05417	Lipid and atherosclerosis - Macaca fascicularis (crab-eating macaque)	2/67	234/9213	0.510869	0.673624	0.542516	102126138/102142258	2
												mcf05163	Human cytomegalovirus infection - Macaca fascicularis (crab-eating macaque)	2/67	245/9213	0.535702	0.684303	0.551116	102116249/102143028	2
												mcf04060	Cytokine-cytokine receptor interaction - Macaca fascicularis (crab-eating macaque)	2/67	301/9213	0.648623	0.746055	0.60085	101925898/102126138	2
												mcf04010	MAPK signaling pathway - Macaca fascicularis (crab-eating macaque)	2/67	305/9213	0.655815	0.746055	0.60085	101865323/102138509	2
												mcf04714	Thermogenesis - Macaca fascicularis (crab-eating macaque)	2/67	327/9213	0.693326	0.757686	0.610217	102119570/102122883	2
												mcf05014	Amyotrophic lateral sclerosis - Macaca fascicularis (crab-eating macaque)	2/67	463/9213	0.857357	0.857357	0.690489	102119570/102122883	2
												mcf00220	Arginine biosynthesis - Macaca fascicularis (crab-eating macaque)	1/67	22/9213	0.148503	0.395125	0.318222	101926704	1
												mcf00630	Glyoxylate and dicarboxylate metabolism - Macaca fascicularis (crab-eating macaque)	1/67	34/9213	0.220116	0.469686	0.378271	101926704	1
												mcf04966	Collecting duct acid secretion - Macaca fascicularis (crab-eating macaque)	1/67	34/9213	0.220116	0.469686	0.378271	101866067	1
												mcf04710	Circadian rhythm - Macaca fascicularis (crab-eating macaque)	1/67	35/9213	0.225808	0.47388	0.381648	102130020	1
												mcf00500	Starch and sucrose metabolism - Macaca fascicularis (crab-eating macaque)	1/67	36/9213	0.23146	0.478994	0.385767	102144832	1
												mcf00250	Alanine, aspartate and glutamate metabolism - Macaca fascicularis (crab-eating macaque)	1/67	40/9213	0.253663	0.517751	0.41698	101926704	1
												mcf00380	Tryptophan metabolism - Macaca fascicularis (crab-eating macaque)	1/67	46/9213	0.285788	0.544942	0.438879	102146810	1
												mcf05144	Malaria - Macaca fascicularis (crab-eating macaque)	1/67	47/9213	0.291008	0.544942	0.438879	102130245	1
												mcf05030	Cocaine addiction - Macaca fascicularis (crab-eating macaque)	1/67	50/9213	0.306444	0.563705	0.453991	102119199	1
												mcf03460	Fanconi anemia pathway - Macaca fascicularis (crab-eating macaque)	1/67	53/9213	0.321548	0.576664	0.464427	102146862	1
												mcf04923	Regulation of lipolysis in adipocytes - Macaca fascicularis (crab-eating macaque)	1/67	59/9213	0.350792	0.607767	0.489477	102143028	1
												mcf00140	Steroid hormone biosynthesis - Macaca fascicularis (crab-eating macaque)	1/67	62/9213	0.364944	0.625019	0.503371	102146810	1
												mcf04330	Notch signaling pathway - Macaca fascicularis (crab-eating macaque)	1/67	66/9213	0.383342	0.628963	0.506548	102146862	1
												mcf05221	Acute myeloid leukemia - Macaca fascicularis (crab-eating macaque)	1/67	67/9213	0.387859	0.628963	0.506548	102136550	1
												mcf00590	Arachidonic acid metabolism - Macaca fascicularis (crab-eating macaque)	1/67	68/9213	0.392344	0.628963	0.506548	102143028	1
												mcf04920	Adipocytokine signaling pathway - Macaca fascicularis (crab-eating macaque)	1/67	69/9213	0.396796	0.628963	0.506548	102144217	1
												mcf00830	Retinol metabolism - Macaca fascicularis (crab-eating macaque)	1/67	71/9213	0.405603	0.636157	0.512341	101865761	1
												mcf05031	Amphetamine addiction - Macaca fascicularis (crab-eating macaque)	1/67	74/9213	0.418578	0.644691	0.519214	102119199	1
												mcf05211	Renal cell carcinoma - Macaca fascicularis (crab-eating macaque)	1/67	75/9213	0.42284	0.644691	0.519214	102144217	1
												mcf00980	Metabolism of xenobiotics by cytochrome P450 - Macaca fascicularis (crab-eating macaque)	1/67	78/9213	0.435444	0.653616	0.526402	102146810	1
												mcf05230	Central carbon metabolism in cancer - Macaca fascicularis (crab-eating macaque)	1/67	80/9213	0.443696	0.653616	0.526402	102144217	1
												mcf03320	PPAR signaling pathway - Macaca fascicularis (crab-eating macaque)	1/67	82/9213	0.451828	0.653616	0.526402	102142258	1
												mcf05133	Pertussis - Macaca fascicularis (crab-eating macaque)	1/67	82/9213	0.451828	0.653616	0.526402	102144610	1
												mcf00010	Glycolysis / Gluconeogenesis - Macaca fascicularis (crab-eating macaque)	1/67	86/9213	0.467744	0.662981	0.533944	102141145	1
												mcf04610	Complement and coagulation cascades - Macaca fascicularis (crab-eating macaque)	1/67	87/9213	0.471651	0.662981	0.533944	102143442	1
												mcf04713	Circadian entrainment - Macaca fascicularis (crab-eating macaque)	1/67	103/9213	0.530457	0.684303	0.551116	102130020	1
												mcf04933	AGE-RAGE signaling pathway in diabetic complications - Macaca fascicularis (crab-eating macaque)	1/67	104/9213	0.53391	0.684303	0.551116	102119232	1
												mcf04625	C-type lectin receptor signaling pathway - Macaca fascicularis (crab-eating macaque)	1/67	105/9213	0.537339	0.684303	0.551116	102143028	1
												mcf05150	Staphylococcus aureus infection - Macaca fascicularis (crab-eating macaque)	1/67	111/9213	0.557393	0.701991	0.565362	102129156	1
												mcf04137	Mitophagy - animal - Macaca fascicularis (crab-eating macaque)	1/67	112/9213	0.560651	0.701991	0.565362	102116967	1
												mcf04724	Glutamatergic synapse - Macaca fascicularis (crab-eating macaque)	1/67	118/9213	0.579709	0.717669	0.577988	101926704	1
												mcf04726	Serotonergic synapse - Macaca fascicularis (crab-eating macaque)	1/67	119/9213	0.582805	0.717669	0.577988	102143028	1
												mcf04611	Platelet activation - Macaca fascicularis (crab-eating macaque)	1/67	123/9213	0.594966	0.726639	0.585213	102144610	1
												mcf04926	Relaxin signaling pathway - Macaca fascicularis (crab-eating macaque)	1/67	132/9213	0.621067	0.746055	0.60085	102142258	1
												mcf04380	Osteoclast differentiation - Macaca fascicularis (crab-eating macaque)	1/67	134/9213	0.626639	0.746055	0.60085	102119199	1
												mcf01200	Carbon metabolism - Macaca fascicularis (crab-eating macaque)	1/67	135/9213	0.629394	0.746055	0.60085	102141145	1
												mcf04142	Lysosome - Macaca fascicularis (crab-eating macaque)	1/67	137/9213	0.634844	0.746055	0.60085	101867227	1
												mcf04910	Insulin signaling pathway - Macaca fascicularis (crab-eating macaque)	1/67	143/9213	0.650727	0.746055	0.60085	102144832	1
												mcf04936	Alcoholic liver disease - Macaca fascicularis (crab-eating macaque)	1/67	145/9213	0.655868	0.746055	0.60085	102126138	1
												mcf05162	Measles - Macaca fascicularis (crab-eating macaque)	1/67	147/9213	0.660935	0.746055	0.60085	102142988	1
												mcf05224	Breast cancer - Macaca fascicularis (crab-eating macaque)	1/67	147/9213	0.660935	0.746055	0.60085	102146862	1
												mcf05017	Spinocerebellar ataxia - Macaca fascicularis (crab-eating macaque)	1/67	155/9213	0.680478	0.757686	0.610217	102124789	1
												mcf04934	Cushing syndrome - Macaca fascicularis (crab-eating macaque)	1/67	157/9213	0.685187	0.757686	0.610217	101866825	1
												mcf04150	mTOR signaling pathway - Macaca fascicularis (crab-eating macaque)	1/67	162/9213	0.696664	0.757686	0.610217	101866184	1
												mcf04921	Oxytocin signaling pathway - Macaca fascicularis (crab-eating macaque)	1/67	162/9213	0.696664	0.757686	0.610217	102143028	1
												mcf04218	Cellular senescence - Macaca fascicularis (crab-eating macaque)	1/67	165/9213	0.703352	0.759416	0.61161	101866825	1
												mcf04110	Cell cycle - Macaca fascicularis (crab-eating macaque)	1/67	176/9213	0.726652	0.775523	0.624582	101866825	1
												mcf04310	Wnt signaling pathway - Macaca fascicularis (crab-eating macaque)	1/67	177/9213	0.728679	0.775523	0.624582	102119503	1
												mcf05152	Tuberculosis - Macaca fascicularis (crab-eating macaque)	1/67	192/9213	0.75736	0.798198	0.642844	101867227	1
												mcf04621	NOD-like receptor signaling pathway - Macaca fascicularis (crab-eating macaque)	1/67	197/9213	0.766239	0.798198	0.642844	102126138	1
												mcf05034	Alcoholism - Macaca fascicularis (crab-eating macaque)	1/67	199/9213	0.769701	0.798198	0.642844	102119199	1
												mcf05207	Chemical carcinogenesis - receptor activation - Macaca fascicularis (crab-eating macaque)	1/67	200/9213	0.771413	0.798198	0.642844	102146810	1
												mcf04613	Neutrophil extracellular trap formation - Macaca fascicularis (crab-eating macaque)	1/67	206/9213	0.781423	0.80298	0.646695	102124789	1
												mcf05203	Viral carcinogenesis - Macaca fascicularis (crab-eating macaque)	1/67	219/9213	0.801655	0.815546	0.656816	101866825	1
												mcf04932	Non-alcoholic fatty liver disease - Macaca fascicularis (crab-eating macaque)	1/67	221/9213	0.804599	0.815546	0.656816	102122883	1
												mcf04020	Calcium signaling pathway - Macaca fascicularis (crab-eating macaque)	1/67	258/9213	0.851917	0.857357	0.690489	102124789	1

## Sheet: BC
GO analysis of BC function gene												KEGG analysis of BC function gene
ONTOLOGY	ID	Description	GeneRatio	BgRatio	pvalue	p.adjust	qvalue	geneID	Count	celltype		ID	Description	GeneRatio	BgRatio	pvalue	p.adjust	qvalue	geneID	Count
BP	GO:0030334	regulation of cell migration	14/58	353/9280	2.27645e-08	3.20069e-05	2.691e-05	PTN/ITGAV/THBS1/CLDN1/GLUL/LAMC2/LAMA3/CYP1B1/CLIC4/TGFB2/CLDN4/IGFBP5/DCN/FN1	14	BC		mcf05165	Human papillomavirus infection - Macaca fascicularis (crab-eating macaque)	12/67	353/9213	7.43e-06	0.000286017	0.000236555	102116249/102122296/102130245/102136323/102116676/102126627/102120952/102144610/102126233/102145859/102143028/102119232	12
BP	GO:0040012	regulation of locomotion	14/58	397/9280	9.92748e-08	4.65268e-05	3.91177e-05	PTN/ITGAV/THBS1/CLDN1/GLUL/LAMC2/LAMA3/CYP1B1/CLIC4/TGFB2/CLDN4/IGFBP5/DCN/FN1	14	BC		mcf04512	ECM-receptor interaction - Macaca fascicularis (crab-eating macaque)	11/67	89/9213	3e-11	4.62e-09	3.82e-09	102116249/102122296/102130245/101867504/102126789/102116676/102126627/102120952/102144610/102126233/102119232	11
BP	GO:0043588	skin development	7/58	109/9280	4.66634e-06	0.000937267	0.000788014	CLDN1/CYP26B1/KRT27/CLIC4/TGFB2/CLDN4/IGFBP5	7	BC		mcf04510	Focal adhesion - Macaca fascicularis (crab-eating macaque)	11/67	212/9213	3.07e-07	1.58e-05	1.3e-05	102116249/102122296/102130245/102116676/102126627/102120952/102125340/102144610/102126372/102126233/102119232	11
BP	GO:0018149	peptide cross-linking	4/58	23/9280	1.11339e-05	0.00193162	0.00162403	TGM2/THBS1/DCN/FN1	4	BC		mcf04151	PI3K-Akt signaling pathway - Macaca fascicularis (crab-eating macaque)	11/67	382/9213	8.55e-05	0.00164562	0.00136104	102116249/102122296/102130245/102136323/102116676/102126627/102120952/102144610/101866184/102126233/102119232	11
BP	GO:0007229	integrin-mediated signaling pathway	5/58	51/9280	1.50873e-05	0.00212128	0.00178348	PTN/ITGAV/ITGB6/ITGB1/FN1	5	BC		mcf05222	Small cell lung cancer - Macaca fascicularis (crab-eating macaque)	9/67	104/9213	5.21e-08	4.01e-06	3.32e-06	102116249/102116676/102126627/102120952/102144610/102126233/102145859/102143028/102119232	9
BP	GO:0035914	skeletal muscle cell differentiation	4/58	34/9280	5.54002e-05	0.00708116	0.00595354	CYP26B1/HLF/BTG2/RB1	4	BC		mcf05205	Proteoglycans in cancer - Macaca fascicularis (crab-eating macaque)	9/67	214/9213	2.21e-05	0.000486337	0.000402234	102116249/102130245/102136323/101867504/102126789/102144610/101925182/101866144/102119232	9
BP	GO:0009410	response to xenobiotic stimulus	5/58	72/9280	8.13152e-05	0.00825489	0.00694036	THBS1/CYP26B1/CYP1B1/TGFB2/RB1	5	BC		mcf05206	MicroRNAs in cancer - Macaca fascicularis (crab-eating macaque)	8/67	163/9213	2.17e-05	0.000486337	0.000402234	102130245/102136323/101867504/101864882/102146810/101864871/101925182/102143028	8
BP	GO:0001667	ameboidal-type cell migration	7/58	170/9280	8.37833e-05	0.00825489	0.00694036	THBS1/GLUL/S100A2/CYP1B1/TGFB2/DCN/FN1	7	BC		mcf05146	Amoebiasis - Macaca fascicularis (crab-eating macaque)	7/67	110/9213	1.38e-05	0.000424019	0.000350692	102116676/102126627/102120952/101865323/101925182/102126233/102119232	7
BP	GO:0010631	epithelial cell migration	6/58	119/9280	9.20449e-05	0.00825489	0.00694036	THBS1/GLUL/S100A2/CYP1B1/TGFB2/DCN	6	BC		mcf05410	Hypertrophic cardiomyopathy - Macaca fascicularis (crab-eating macaque)	6/67	103/9213	9.69e-05	0.00165858	0.00137176	102116249/102122296/101864882/102144610/102141630/101925182	6
BP	GO:0090132	epithelium migration	6/58	120/9280	9.64244e-05	0.00825489	0.00694036	THBS1/GLUL/S100A2/CYP1B1/TGFB2/DCN	6	BC		mcf05414	Dilated cardiomyopathy - Macaca fascicularis (crab-eating macaque)	6/67	105/9213	0.000107867	0.00166116	0.00137389	102116249/102122296/101864882/102144610/102141630/101925182	6
BP	GO:0043277	apoptotic cell clearance	3/58	15/9280	9.99543e-05	0.00825489	0.00694036	ITGAV/TGM2/THBS1	3	BC		mcf05145	Toxoplasmosis - Macaca fascicularis (crab-eating macaque)	6/67	120/9213	0.000224849	0.00288557	0.00238656	102116676/102126627/102120952/102144610/101925182/102126233	6
BP	GO:0061436	establishment of skin barrier	3/58	15/9280	9.99543e-05	0.00825489	0.00694036	CLDN1/CYP26B1/CLDN4	3	BC		mcf04514	Cell adhesion molecules - Macaca fascicularis (crab-eating macaque)	6/67	158/9213	0.000974151	0.0115399	0.00954432	102116249/102136275/102126789/102144610/102145576/102119565	6
BP	GO:0090130	tissue migration	6/58	122/9280	0.000105681	0.00825489	0.00694036	THBS1/GLUL/S100A2/CYP1B1/TGFB2/DCN	6	BC		mcf04530	Tight junction - Macaca fascicularis (crab-eating macaque)	5/67	179/9213	0.00957176	0.0921281	0.0761962	102136275/101926790/102144610/102145576/102119565	5
BP	GO:0097190	apoptotic signaling pathway	8/58	240/9280	0.000111706	0.00826626	0.00694993	ITGAV/THBS1/MDM2/CLU/UACA/CYP1B1/IFI27/TGFB2	8	BC		mcf05169	Epstein-Barr virus infection - Macaca fascicularis (crab-eating macaque)	5/67	223/9213	0.0227812	0.15255	0.126169	102136323/101867504/101867173/101864871/102145859	5
BP	GO:0071634	regulation of transforming growth factor beta production	3/58	18/9280	0.000176885	0.0118428	0.00995697	ITGAV/TGFB2/FN1	3	BC		mcf04810	Regulation of actin cytoskeleton - Macaca fascicularis (crab-eating macaque)	5/67	242/9213	0.030995	0.170472	0.140992	102116249/102122296/101926790/102144610/102119232	5
BP	GO:0071604	transforming growth factor beta production	3/58	19/9280	0.00020912	0.0127836	0.0107479	ITGAV/TGFB2/FN1	3	BC		mcf05163	Human cytomegalovirus infection - Macaca fascicularis (crab-eating macaque)	5/67	245/9213	0.0324424	0.17228	0.142487	102116249/102136323/101867173/102145859/102143028	5
BP	GO:0007160	cell-matrix adhesion	5/58	90/9280	0.000234471	0.013244	0.011135	ITGAV/ITGB6/THBS1/ITGB1/FN1	5	BC		mcf05219	Bladder cancer - Macaca fascicularis (crab-eating macaque)	4/67	41/9213	0.000211307	0.00288557	0.00238656	102130245/102136323/102142258/102145859	4
BP	GO:0035295	tube development	10/58	421/9280	0.000244612	0.013244	0.011135	ITGAV/TGM2/THBS1/GLUL/CYP1B1/CLIC4/TGFB2/RB1/IGFBP5/DCN	10	BC		mcf04260	Cardiac muscle contraction - Macaca fascicularis (crab-eating macaque)	4/67	117/9213	0.0102427	0.0927865	0.0767407	101925502/101864882/102141630/101866484	4
BP	GO:0001525	angiogenesis	7/58	202/9280	0.000244911	0.013244	0.011135	ITGAV/THBS1/GLUL/CYP1B1/CLIC4/TGFB2/DCN	7	BC		mcf04670	Leukocyte transendothelial migration - Macaca fascicularis (crab-eating macaque)	4/67	120/9213	0.0111672	0.0955414	0.0790192	102136275/102144610/102145576/102119565	4
BP	GO:0090303	positive regulation of wound healing	3/58	21/9280	0.000284489	0.0139404	0.0117205	THBS1/CLDN1/CLDN4	3	BC		mcf04148	Efferocytosis - Macaca fascicularis (crab-eating macaque)	4/67	162/9213	0.0300028	0.170472	0.140992	102116249/102130245/101866184/102143028	4
BP	GO:0042303	molting cycle	4/58	52/9280	0.000297448	0.0139404	0.0117205	KRT27/PER1/TGFB2/IGFBP5	4	BC		mcf05160	Hepatitis C - Macaca fascicularis (crab-eating macaque)	4/67	171/9213	0.0355702	0.182594	0.151017	102136275/102145576/102119565/102145859	4
BP	GO:0042633	hair cycle	4/58	52/9280	0.000297448	0.0139404	0.0117205	KRT27/PER1/TGFB2/IGFBP5	4	BC		mcf04710	Circadian rhythm - Macaca fascicularis (crab-eating macaque)	3/67	35/9213	0.00203734	0.0224107	0.0185352	102141183/101865021/102130020	3
BP	GO:0001523	retinoid metabolic process	3/58	23/9280	0.000375472	0.0150832	0.0126813	CYP26B1/CYP1B1/RBP1	3	BC		mcf05144	Malaria - Macaca fascicularis (crab-eating macaque)	3/67	47/9213	0.00474371	0.048702	0.0402799	102130245/102126789/101925182	3
BP	GO:0016101	diterpenoid metabolic process	3/58	23/9280	0.000375472	0.0150832	0.0126813	CYP26B1/CYP1B1/RBP1	3	BC		mcf05412	Arrhythmogenic right ventricular cardiomyopathy - Macaca fascicularis (crab-eating macaque)	3/67	78/9213	0.0189784	0.15255	0.126169	102116249/102122296/102144610	3
BP	GO:0030199	collagen fibril organization	3/58	23/9280	0.000375472	0.0150832	0.0126813	CYP1B1/TGFB2/RB1	3	BC		mcf05220	Chronic myeloid leukemia - Macaca fascicularis (crab-eating macaque)	3/67	80/9213	0.0202876	0.15255	0.126169	102136323/101925182/102145859	3
BP	GO:0060537	muscle tissue development	6/58	158/9280	0.00043163	0.0165598	0.0139228	CYP26B1/HLF/BTG2/TGFB2/RB1/IGFBP5	6	BC		mcf05100	Bacterial invasion of epithelial cells - Macaca fascicularis (crab-eating macaque)	3/67	82/9213	0.0216456	0.15255	0.126169	101926790/102144610/102119232	3
BP	GO:0030155	regulation of cell adhesion	8/58	293/9280	0.000435784	0.0165598	0.0139228	ITGAV/TGM2/THBS1/LAMA3/CYP1B1/TGFB2/LMO7/FN1	8	BC		mcf04115	p53 signaling pathway - Macaca fascicularis (crab-eating macaque)	3/67	85/9213	0.0237741	0.15255	0.126169	102130245/102136323/102139392	3
BP	GO:0033627	cell adhesion mediated by integrin	3/58	28/9280	0.000679316	0.0222254	0.0186862	ITGAV/CYP1B1/TGFB2	3	BC		mcf05140	Leishmaniasis - Macaca fascicularis (crab-eating macaque)	3/67	85/9213	0.0237741	0.15255	0.126169	102144610/101925182/102143028	3
BP	GO:1901700	response to oxygen-containing compound	10/58	480/9280	0.000692177	0.0222254	0.0186862	TGM2/THBS1/MDM2/GLUL/CYP26B1/CYP1B1/PER1/TGFB2/RB1/IGFBP5	10	BC		mcf04610	Complement and coagulation cascades - Macaca fascicularis (crab-eating macaque)	3/67	87/9213	0.0252541	0.155565	0.128663	102135485/102143404/102143442	3
BP	GO:0008544	epidermis development	5/58	115/9280	0.000727146	0.0222254	0.0186862	CYP26B1/KRT27/CLIC4/TGFB2/IGFBP5	5	BC		mcf04713	Circadian entrainment - Macaca fascicularis (crab-eating macaque)	3/67	103/9213	0.0388421	0.192958	0.159589	102141183/101865021/102130020	3
BP	GO:0030104	water homeostasis	3/58	29/9280	0.000754347	0.0225662	0.0189727	CLDN1/CYP26B1/CLDN4	3	BC		mcf05150	Staphylococcus aureus infection - Macaca fascicularis (crab-eating macaque)	3/67	111/9213	0.0467821	0.225139	0.186205	102142160/102122834/102129156	3
BP	GO:0061061	muscle structure development	7/58	247/9280	0.000821034	0.0233611	0.019641	MDM2/CYP26B1/HLF/BTG2/ITGB1/RB1/IGFBP5	7	BC		mcf04350	TGF-beta signaling pathway - Macaca fascicularis (crab-eating macaque)	3/67	113/9213	0.0488835	0.228123	0.188673	102130245/101925182/101866144	3
BP	GO:0014068	positive regulation of phosphatidylinositol 3-kinase signaling	3/58	31/9280	0.00091978	0.0241288	0.0202864	TGFB2/DCN/FN1	3	BC		mcf04919	Thyroid hormone signaling pathway - Macaca fascicularis (crab-eating macaque)	3/67	128/9213	0.066079	0.290748	0.240468	102116249/102136323/101866484	3
BP	GO:0048771	tissue remodeling	4/58	70/9280	0.000926709	0.0241288	0.0202864	PTN/MDM2/ELF3/IGFBP5	4	BC		mcf04068	FoxO signaling pathway - Macaca fascicularis (crab-eating macaque)	3/67	131/9213	0.0698122	0.293191	0.242489	102136323/101866184/101925182	3
BP	GO:0050673	epithelial cell proliferation	6/58	185/9280	0.000990876	0.0253304	0.0212967	PTN/THBS1/CLDN1/TGFB2/RB1/IGFBP5	6	BC		mcf05135	Yersinia infection - Macaca fascicularis (crab-eating macaque)	3/67	145/9213	0.0884518	0.349271	0.288871	101926790/102144610/102119232	3
BP	GO:0045597	positive regulation of cell differentiation	8/58	333/9280	0.00101114	0.0253869	0.0213442	PTN/TGM2/MDM2/CYP26B1/ADIRF/TGFB2/RB1/FN1	8	BC		mcf04261	Adrenergic signaling in cardiomyocytes - Macaca fascicularis (crab-eating macaque)	3/67	159/9213	0.108958	0.390222	0.32274	101864882/102141630/101866484	3
BP	GO:0008284	positive regulation of cell population proliferation	8/58	340/9280	0.00115644	0.0270993	0.022784	PTN/ITGAV/THBS1/CLDN1/LAMC2/TGFB2/IGFBP5/FN1	8	BC		mcf04218	Cellular senescence - Macaca fascicularis (crab-eating macaque)	3/67	165/9213	0.118268	0.395941	0.32747	102136323/101925182/102145859	3
BP	GO:0000902	cell morphogenesis	8/58	341/9280	0.0011785	0.0271635	0.0228379	PTN/ITGAV/CLU/CLIC4/TGFB2/CLDN4/RB1/FN1	8	BC		mcf04145	Phagosome - Macaca fascicularis (crab-eating macaque)	3/67	174/9213	0.13277	0.4268	0.352992	102116249/102130245/102144610	3
BP	GO:0008285	negative regulation of cell population proliferation	7/58	276/9280	0.0015665	0.0349603	0.0293931	PTN/THBS1/CYP1B1/BTG2/TGFB2/RB1/IGFBP5	7	BC		mcf04110	Cell cycle - Macaca fascicularis (crab-eating macaque)	3/67	176/9213	0.136075	0.4268	0.352992	102136323/101925182/102145859	3
BP	GO:0060429	epithelium development	9/58	446/9280	0.00164608	0.0356199	0.0299477	TGM2/CYP26B1/KRT27/TAGLN/KRT12/ELF3/CLIC4/TGFB2/IGFBP5	9	BC		mcf04360	Axon guidance - Macaca fascicularis (crab-eating macaque)	3/67	186/9213	0.15302	0.4268	0.352992	102122350/102144069/102144610	3
BP	GO:0071466	cellular response to xenobiotic stimulus	3/58	39/9280	0.001805	0.037321	0.0313779	CYP26B1/CYP1B1/RB1	3	BC		mcf05166	Human T-cell leukemia virus 1 infection - Macaca fascicularis (crab-eating macaque)	3/67	233/9213	0.239934	0.54338	0.449412	101867173/101925182/102145859	3
BP	GO:0006954	inflammatory response	7/58	284/9280	0.00184482	0.0375915	0.0316054	PTN/THBS1/CYP26B1/CLU/ELF3/RB1/FN1	7	BC		mcf04960	Aldosterone-regulated sodium reabsorption - Macaca fascicularis (crab-eating macaque)	2/67	37/9213	0.029464	0.170472	0.140992	101866184/101866484	2
BP	GO:0048646	anatomical structure formation involved in morphogenesis	9/58	457/9280	0.00194704	0.0391077	0.0328801	ITGAV/TGM2/THBS1/GLUL/CYP1B1/CLIC4/TGFB2/DCN/FN1	9	BC		mcf04913	Ovarian steroidogenesis - Macaca fascicularis (crab-eating macaque)	2/67	53/9213	0.0566282	0.256493	0.212137	102146810/102143028	2
BP	GO:0042572	retinol metabolic process	2/58	11/9280	0.0020365	0.0403284	0.0339064	CYP1B1/RBP1	2	BC		mcf04370	VEGF signaling pathway - Macaca fascicularis (crab-eating macaque)	2/67	60/9213	0.0704421	0.293191	0.242489	101865323/102143028	2
BP	GO:0001942	hair follicle development	3/58	43/9280	0.0023947	0.0438426	0.036861	KRT27/TGFB2/IGFBP5	3	BC		mcf05204	Chemical carcinogenesis - DNA adducts - Macaca fascicularis (crab-eating macaque)	2/67	68/9213	0.0874111	0.349271	0.288871	102146810/102143028	2
BP	GO:0042573	retinoic acid metabolic process	2/58	12/9280	0.002434	0.0438426	0.036861	CYP26B1/RBP1	2	BC		mcf00830	Retinol metabolism - Macaca fascicularis (crab-eating macaque)	2/67	71/9213	0.0940624	0.361756	0.299196	101865761/102131789	2
BP	GO:0097435	supramolecular fiber organization	7/58	300/9280	0.00251619	0.0438426	0.036861	MDM2/SPTBN1/CLU/ARPC1B/CYP1B1/TGFB2/RB1	7	BC		mcf05218	Melanoma - Macaca fascicularis (crab-eating macaque)	2/67	72/9213	0.0963116	0.361756	0.299196	102136323/102145859	2
BP	GO:0050678	regulation of epithelial cell proliferation	5/58	153/9280	0.00258815	0.0438426	0.036861	PTN/THBS1/CLDN1/TGFB2/RB1	5	BC		mcf05214	Glioma - Macaca fascicularis (crab-eating macaque)	2/67	76/9213	0.105459	0.386685	0.319814	102136323/102145859	2
BP	GO:0034754	cellular hormone metabolic process	3/58	45/9280	0.00272927	0.0442507	0.0372041	CYP26B1/CYP1B1/RBP1	3	BC		mcf05212	Pancreatic cancer - Macaca fascicularis (crab-eating macaque)	2/67	81/9213	0.11721	0.395941	0.32747	101925182/102145859	2
BP	GO:0014009	glial cell proliferation	2/58	13/9280	0.00286502	0.044758	0.0376306	CLU/RB1	2	BC		mcf04970	Salivary secretion - Macaca fascicularis (crab-eating macaque)	2/67	90/9213	0.13913	0.4268	0.352992	101865866/101866484	2
BP	GO:0032369	negative regulation of lipid transport	2/58	13/9280	0.00286502	0.044758	0.0376306	ITGAV/THBS1	2	BC		mcf04727	GABAergic synapse - Macaca fascicularis (crab-eating macaque)	2/67	93/9213	0.146626	0.4268	0.352992	101926704/102129445	2
CC	GO:0030312	external encapsulating structure	7/70	139/10372	3.95731e-05	0.00251289	0.00206197	TGM2/THBS1/LAMC2/LAMB4/MMP1/TGFB2/FN1	7	BC		mcf01522	Endocrine resistance - Macaca fascicularis (crab-eating macaque)	2/67	98/9213	0.159301	0.4268	0.352992	102136323/102145859	2
CC	GO:0031012	extracellular matrix	7/70	139/10372	3.95731e-05	0.00251289	0.00206197	TGM2/THBS1/LAMC2/LAMB4/MMP1/TGFB2/FN1	7	BC		mcf04657	IL-17 signaling pathway - Macaca fascicularis (crab-eating macaque)	2/67	99/9213	0.16186	0.4268	0.352992	102142258/102143028	2
CC	GO:0008305	integrin complex	3/70	18/10372	0.000223405	0.00945748	0.00776039	ITGAV/ITGB6/ITGB1	3	BC		mcf04640	Hematopoietic cell lineage - Macaca fascicularis (crab-eating macaque)	2/67	100/9213	0.164428	0.4268	0.352992	101867504/102143442	2
CC	GO:0098636	protein complex involved in cell adhesion	3/70	26/10372	0.00068482	0.0217063	0.0178112	ITGAV/ITGB6/ITGB1	3	BC		mcf05215	Prostate cancer - Macaca fascicularis (crab-eating macaque)	2/67	100/9213	0.164428	0.4268	0.352992	102136323/102145859	2
CC	GO:0005902	microvillus	3/70	28/10372	0.00085458	0.0217063	0.0178112	ITGAV/CD44/CLIC4	3	BC		mcf04520	Adherens junction - Macaca fascicularis (crab-eating macaque)	2/67	101/9213	0.167003	0.4268	0.352992	101865447/101866743	2
CC	GO:0005882	intermediate filament	4/70	79/10372	0.00195305	0.0380463	0.0312191	KRT27/KRT12/VIM/KRT7	4	BC		mcf04933	AGE-RAGE signaling pathway in diabetic complications - Macaca fascicularis (crab-eating macaque)	2/67	104/9213	0.174769	0.4268	0.352992	101925182/102119232	2
MF	GO:0005178	integrin binding	5/61	41/9563	5.61539e-06	0.001168	0.00109352	PTN/ITGAV/ITGB6/THBS1/FN1	5	BC		mcf04625	C-type lectin receptor signaling pathway - Macaca fascicularis (crab-eating macaque)	2/67	105/9213	0.177371	0.4268	0.352992	102136323/102143028	2
MF	GO:0050839	cell adhesion molecule binding	6/61	82/9563	1.25917e-05	0.00130954	0.00122603	PTN/ITGAV/ITGB6/THBS1/FXYD5/FN1	6	BC		mcf04972	Pancreatic secretion - Macaca fascicularis (crab-eating macaque)	2/67	105/9213	0.177371	0.4268	0.352992	101865866/101866484	2
MF	GO:0001968	fibronectin binding	3/61	11/9563	3.92951e-05	0.00272446	0.00255073	ITGAV/THBS1/IGFBP5	3	BC		mcf04974	Protein digestion and absorption - Macaca fascicularis (crab-eating macaque)	2/67	105/9213	0.177371	0.4268	0.352992	102132120/101866484	2
MF	GO:0097718	disordered domain specific binding	3/61	14/9563	8.55117e-05	0.00444661	0.00416307	MDM2/RB1/FN1	3	BC		mcf05323	Rheumatoid arthritis - Macaca fascicularis (crab-eating macaque)	2/67	105/9213	0.177371	0.4268	0.352992	102142258/101925182	2
MF	GO:0050840	extracellular matrix binding	3/61	19/9563	0.000222522	0.00925693	0.00866666	ITGAV/THBS1/DCN	3	BC		mcf05226	Gastric cancer - Macaca fascicularis (crab-eating macaque)	2/67	148/9213	0.292586	0.625809	0.517587	101925182/102145859	2
MF	GO:0005539	glycosaminoglycan binding	5/61	92/9563	0.000287343	0.00996121	0.00932603	PTN/THBS1/CD44/DCN/FN1	5	BC		mcf04915	Estrogen signaling pathway - Macaca fascicularis (crab-eating macaque)	2/67	151/9213	0.300683	0.634317	0.524623	102142160/102122834	2
MF	GO:0003779	actin binding	7/61	219/9563	0.000458004	0.0136093	0.0127415	SPTBN1/ARPC1B/FXYD5/TAGLN/TPM1/TPM2/CALD1	7	BC		mcf05418	Fluid shear stress and atherosclerosis - Macaca fascicularis (crab-eating macaque)	2/67	160/9213	0.324879	0.646093	0.534363	102116249/102126789	2
MF	GO:0005198	structural molecule activity	9/61	400/9563	0.000900345	0.023409	0.0219163	SPTBN1/CLDN1/RPS16/KRT27/KRT12/CLDN7/CLDN4/RPL28/DCN	9	BC		mcf04390	Hippo signaling pathway - Macaca fascicularis (crab-eating macaque)	2/67	161/9213	0.327556	0.646093	0.534363	101865447/101925182	2
MF	GO:0031625	ubiquitin protein ligase binding	5/61	130/9563	0.00139034	0.0321322	0.0300833	MDM2/CLU/PER1/PER3/RB1	5	BC		mcf05225	Hepatocellular carcinoma - Macaca fascicularis (crab-eating macaque)	2/67	174/9213	0.362088	0.67798	0.560736	101925182/102145859	2
MF	GO:0044877	protein-containing complex binding	9/61	432/9563	0.00154513	0.0321388	0.0300895	PTN/ITGAV/ITGB6/THBS1/MDM2/CLU/TAGLN/DCN/FN1	9	BC		mcf05161	Hepatitis B - Macaca fascicularis (crab-eating macaque)	2/67	177/9213	0.369972	0.67798	0.560736	101925182/102145859	2
												mcf04723	Retrograde endocannabinoid signaling - Macaca fascicularis (crab-eating macaque)	2/67	178/9213	0.372592	0.67798	0.560736	102122883/102143028	2
												mcf05207	Chemical carcinogenesis - receptor activation - Macaca fascicularis (crab-eating macaque)	2/67	200/9213	0.429056	0.685096	0.56662	102146810/102145859	2
												mcf04814	Motor proteins - Macaca fascicularis (crab-eating macaque)	2/67	209/9213	0.451411	0.685096	0.56662	101864882/102141630	2
												mcf05202	Transcriptional misregulation in cancer - Macaca fascicularis (crab-eating macaque)	2/67	216/9213	0.468464	0.685096	0.56662	102136323/102141183	2
												mcf05203	Viral carcinogenesis - Macaca fascicularis (crab-eating macaque)	2/67	219/9213	0.475679	0.685096	0.56662	102136323/102145859	2
												mcf05167	Kaposi sarcoma-associated herpesvirus infection - Macaca fascicularis (crab-eating macaque)	2/67	221/9213	0.480457	0.685096	0.56662	102145859/102143028	2
												mcf04015	Rap1 signaling pathway - Macaca fascicularis (crab-eating macaque)	2/67	223/9213	0.485208	0.685524	0.566975	102130245/102144610	2
												mcf04144	Endocytosis - Macaca fascicularis (crab-eating macaque)	2/67	259/9213	0.56607	0.75063	0.620822	102136323/101926790	2
												mcf05415	Diabetic cardiomyopathy - Macaca fascicularis (crab-eating macaque)	2/67	278/9213	0.605012	0.770015	0.636855	102122883/101925182	2
												mcf04060	Cytokine-cytokine receptor interaction - Macaca fascicularis (crab-eating macaque)	2/67	301/9213	0.648623	0.782911	0.64752	101925898/101925182	2
												mcf05208	Chemical carcinogenesis - reactive oxygen species - Macaca fascicularis (crab-eating macaque)	2/67	303/9213	0.652233	0.782911	0.64752	102122883/102146810	2
												mcf04010	MAPK signaling pathway - Macaca fascicularis (crab-eating macaque)	2/67	305/9213	0.655815	0.782911	0.64752	101865323/101925182	2
												mcf05016	Huntington disease - Macaca fascicularis (crab-eating macaque)	2/67	396/9213	0.789899	0.862727	0.713533	102122746/102122883	2
												mcf05010	Alzheimer disease - Macaca fascicularis (crab-eating macaque)	2/67	471/9213	0.863958	0.898984	0.74352	102122883/102143028	2
												mcf03010	Ribosome - Macaca fascicularis (crab-eating macaque)	2/67	485/9213	0.874853	0.901636	0.745714	101865856/101925497	2
												mcf00910	Nitrogen metabolism - Macaca fascicularis (crab-eating macaque)	1/67	17/9213	0.116788	0.395941	0.32747	101926704	1
												mcf00220	Arginine biosynthesis - Macaca fascicularis (crab-eating macaque)	1/67	22/9213	0.148503	0.4268	0.352992	101926704	1
												mcf04964	Proximal tubule bicarbonate reclamation - Macaca fascicularis (crab-eating macaque)	1/67	23/9213	0.154711	0.4268	0.352992	101866484	1
												mcf04950	Maturity onset diabetes of the young - Macaca fascicularis (crab-eating macaque)	1/67	26/9213	0.173066	0.4268	0.352992	101925834	1
												mcf00601	Glycosphingolipid biosynthesis - lacto and neolacto series - Macaca fascicularis (crab-eating macaque)	1/67	28/9213	0.185084	0.438507	0.362675	102115716	1
												mcf00630	Glyoxylate and dicarboxylate metabolism - Macaca fascicularis (crab-eating macaque)	1/67	34/9213	0.220116	0.513604	0.424785	101926704	1
												mcf00500	Starch and sucrose metabolism - Macaca fascicularis (crab-eating macaque)	1/67	36/9213	0.23146	0.532013	0.440011	101926679	1
												mcf00250	Alanine, aspartate and glutamate metabolism - Macaca fascicularis (crab-eating macaque)	1/67	40/9213	0.253663	0.566147	0.468242	101926704	1
												mcf04973	Carbohydrate digestion and absorption - Macaca fascicularis (crab-eating macaque)	1/67	45/9213	0.28053	0.617166	0.510438	101866484	1
												mcf00380	Tryptophan metabolism - Macaca fascicularis (crab-eating macaque)	1/67	46/9213	0.285788	0.619878	0.512681	102146810	1
												mcf04216	Ferroptosis - Macaca fascicularis (crab-eating macaque)	1/67	50/9213	0.306444	0.637734	0.527449	102146166	1
												mcf04979	Cholesterol metabolism - Macaca fascicularis (crab-eating macaque)	1/67	52/9213	0.31655	0.646093	0.534363	101865784	1
												mcf04961	Endocrine and other factor-regulated calcium reabsorption - Macaca fascicularis (crab-eating macaque)	1/67	53/9213	0.321548	0.646093	0.534363	101866484	1
												mcf00330	Arginine and proline metabolism - Macaca fascicularis (crab-eating macaque)	1/67	55/9213	0.331437	0.646093	0.534363	102146166	1
												mcf04923	Regulation of lipolysis in adipocytes - Macaca fascicularis (crab-eating macaque)	1/67	59/9213	0.350792	0.675274	0.558497	102143028	1
												mcf00140	Steroid hormone biosynthesis - Macaca fascicularis (crab-eating macaque)	1/67	62/9213	0.364944	0.67798	0.560736	102146810	1
												mcf05321	Inflammatory bowel disease - Macaca fascicularis (crab-eating macaque)	1/67	64/9213	0.37421	0.67798	0.560736	101925182	1
												mcf05221	Acute myeloid leukemia - Macaca fascicularis (crab-eating macaque)	1/67	67/9213	0.387859	0.685096	0.56662	102141183	1
												mcf00590	Arachidonic acid metabolism - Macaca fascicularis (crab-eating macaque)	1/67	68/9213	0.392344	0.685096	0.56662	102143028	1
												mcf05223	Non-small cell lung cancer - Macaca fascicularis (crab-eating macaque)	1/67	72/9213	0.40996	0.685096	0.56662	102145859	1
												mcf04978	Mineral absorption - Macaca fascicularis (crab-eating macaque)	1/67	74/9213	0.418578	0.685096	0.56662	101866484	1
												mcf05211	Renal cell carcinoma - Macaca fascicularis (crab-eating macaque)	1/67	75/9213	0.42284	0.685096	0.56662	101925182	1
												mcf04918	Thyroid hormone synthesis - Macaca fascicularis (crab-eating macaque)	1/67	76/9213	0.427072	0.685096	0.56662	101866484	1
												mcf05416	Viral myocarditis - Macaca fascicularis (crab-eating macaque)	1/67	76/9213	0.427072	0.685096	0.56662	102143442	1
												mcf00980	Metabolism of xenobiotics by cytochrome P450 - Macaca fascicularis (crab-eating macaque)	1/67	78/9213	0.435444	0.685096	0.56662	102146810	1
												mcf04612	Antigen processing and presentation - Macaca fascicularis (crab-eating macaque)	1/67	78/9213	0.435444	0.685096	0.56662	101867173	1
												mcf04971	Gastric acid secretion - Macaca fascicularis (crab-eating macaque)	1/67	78/9213	0.435444	0.685096	0.56662	101866484	1
												mcf03320	PPAR signaling pathway - Macaca fascicularis (crab-eating macaque)	1/67	82/9213	0.451828	0.685096	0.56662	102142258	1
												mcf05133	Pertussis - Macaca fascicularis (crab-eating macaque)	1/67	82/9213	0.451828	0.685096	0.56662	102144610	1
												mcf04976	Bile secretion - Macaca fascicularis (crab-eating macaque)	1/67	84/9213	0.459844	0.685096	0.56662	101866484	1
												mcf03018	RNA degradation - Macaca fascicularis (crab-eating macaque)	1/67	85/9213	0.463808	0.685096	0.56662	102141340	1
												mcf01524	Platinum drug resistance - Macaca fascicularis (crab-eating macaque)	1/67	86/9213	0.467744	0.685096	0.56662	102136323	1
												mcf01230	Biosynthesis of amino acids - Macaca fascicularis (crab-eating macaque)	1/67	87/9213	0.471651	0.685096	0.56662	101926704	1
												mcf04911	Insulin secretion - Macaca fascicularis (crab-eating macaque)	1/67	87/9213	0.471651	0.685096	0.56662	101866484	1
												mcf04146	Peroxisome - Macaca fascicularis (crab-eating macaque)	1/67	89/9213	0.479381	0.685096	0.56662	101865533	1
												mcf05210	Colorectal cancer - Macaca fascicularis (crab-eating macaque)	1/67	99/9213	0.51639	0.718183	0.593986	101925182	1
												mcf04061	Viral protein interaction with cytokine and cytokine receptor - Macaca fascicularis (crab-eating macaque)	1/67	100/9213	0.519945	0.718183	0.593986	101925898	1
												mcf04925	Aldosterone synthesis and secretion - Macaca fascicularis (crab-eating macaque)	1/67	101/9213	0.523475	0.718183	0.593986	101866484	1
												mcf05142	Chagas disease - Macaca fascicularis (crab-eating macaque)	1/67	102/9213	0.526979	0.718183	0.593986	101925182	1
												mcf04666	Fc gamma R-mediated phagocytosis - Macaca fascicularis (crab-eating macaque)	1/67	104/9213	0.53391	0.719566	0.59513	101926790	1
												mcf04064	NF-kappa B signaling pathway - Macaca fascicularis (crab-eating macaque)	1/67	105/9213	0.537339	0.719566	0.59513	102143028	1
												mcf04668	TNF signaling pathway - Macaca fascicularis (crab-eating macaque)	1/67	115/9213	0.570284	0.75063	0.620822	102143028	1
												mcf04724	Glutamatergic synapse - Macaca fascicularis (crab-eating macaque)	1/67	118/9213	0.579709	0.754218	0.623789	101926704	1
												mcf04726	Serotonergic synapse - Macaca fascicularis (crab-eating macaque)	1/67	119/9213	0.582805	0.754218	0.623789	102143028	1
												mcf04611	Platelet activation - Macaca fascicularis (crab-eating macaque)	1/67	123/9213	0.594966	0.76354	0.631499	102144610	1
												mcf04926	Relaxin signaling pathway - Macaca fascicularis (crab-eating macaque)	1/67	132/9213	0.621067	0.782911	0.64752	102142258	1
												mcf04380	Osteoclast differentiation - Macaca fascicularis (crab-eating macaque)	1/67	134/9213	0.626639	0.782911	0.64752	101925182	1
												mcf04142	Lysosome - Macaca fascicularis (crab-eating macaque)	1/67	137/9213	0.634844	0.782911	0.64752	101865784	1
												mcf04270	Vascular smooth muscle contraction - Macaca fascicularis (crab-eating macaque)	1/67	139/9213	0.640216	0.782911	0.64752	101866069	1
												mcf04550	Signaling pathways regulating pluripotency of stem cells - Macaca fascicularis (crab-eating macaque)	1/67	143/9213	0.650727	0.782911	0.64752	101925834	1
												mcf05224	Breast cancer - Macaca fascicularis (crab-eating macaque)	1/67	147/9213	0.660935	0.782954	0.647556	102145859	1
												mcf04934	Cushing syndrome - Macaca fascicularis (crab-eating macaque)	1/67	157/9213	0.685187	0.804848	0.665664	102145859	1
												mcf04150	mTOR signaling pathway - Macaca fascicularis (crab-eating macaque)	1/67	162/9213	0.696664	0.804848	0.665664	101866184	1
												mcf04921	Oxytocin signaling pathway - Macaca fascicularis (crab-eating macaque)	1/67	162/9213	0.696664	0.804848	0.665664	102143028	1
												mcf04022	cGMP-PKG signaling pathway - Macaca fascicularis (crab-eating macaque)	1/67	165/9213	0.703352	0.804848	0.665664	101866484	1
												mcf04120	Ubiquitin mediated proteolysis - Macaca fascicularis (crab-eating macaque)	1/67	166/9213	0.705548	0.804848	0.665664	102136323	1
												mcf04141	Protein processing in endoplasmic reticulum - Macaca fascicularis (crab-eating macaque)	1/67	178/9213	0.730691	0.8274	0.684316	102135500	1
												mcf05164	Influenza A - Macaca fascicularis (crab-eating macaque)	1/67	188/9213	0.750017	0.843085	0.697289	102133163	1
												mcf05152	Tuberculosis - Macaca fascicularis (crab-eating macaque)	1/67	192/9213	0.75736	0.84517	0.699012	101925182	1
												mcf04062	Chemokine signaling pathway - Macaca fascicularis (crab-eating macaque)	1/67	198/9213	0.767977	0.850852	0.703712	101925898	1
												mcf04217	Necroptosis - Macaca fascicularis (crab-eating macaque)	1/67	208/9213	0.784663	0.862727	0.713533	101926704	1
												mcf04932	Non-alcoholic fatty liver disease - Macaca fascicularis (crab-eating macaque)	1/67	221/9213	0.804599	0.870575	0.720025	102122883	1
												mcf04024	cAMP signaling pathway - Macaca fascicularis (crab-eating macaque)	1/67	228/9213	0.814569	0.870575	0.720025	101866484	1
												mcf00190	Oxidative phosphorylation - Macaca fascicularis (crab-eating macaque)	1/67	234/9213	0.822715	0.870575	0.720025	102122883	1
												mcf05417	Lipid and atherosclerosis - Macaca fascicularis (crab-eating macaque)	1/67	234/9213	0.822715	0.870575	0.720025	102142258	1
												mcf05170	Human immunodeficiency virus 1 infection - Macaca fascicularis (crab-eating macaque)	1/67	236/9213	0.825351	0.870575	0.720025	101867173	1
												mcf04020	Calcium signaling pathway - Macaca fascicularis (crab-eating macaque)	1/67	258/9213	0.851917	0.892484	0.738145	101925502	1
												mcf05132	Salmonella infection - Macaca fascicularis (crab-eating macaque)	1/67	284/9213	0.878217	0.901636	0.745714	101926790	1
												mcf04714	Thermogenesis - Macaca fascicularis (crab-eating macaque)	1/67	327/9213	0.911977	0.930096	0.769252	102122883	1
												mcf05020	Prion disease - Macaca fascicularis (crab-eating macaque)	1/67	360/9213	0.931462	0.942111	0.77919	102122883	1
												mcf05012	Parkinson disease - Macaca fascicularis (crab-eating macaque)	1/67	369/9213	0.935994	0.942111	0.77919	102122883	1
												mcf05014	Amyotrophic lateral sclerosis - Macaca fascicularis (crab-eating macaque)	1/67	463/9213	0.968802	0.968802	0.801265	102122883	1
