# Supplementary material for: Long-read single-cell RNA sequencing analysis of key genes and isoforms during corneal wound healing in cynomolgus monkeys
Source: Research Square preprint supplement (doi:10.21203/rs.3.rs-5232061/v1), 2025-03-05
Supplement: Supplementary file 7 [file Supplementary Data13_Pseudotime dependent differential gene.xlsx]

## Sheet: Gene
Time differential gene	cluster		GO analysis
ALDH3A1	blue		ONTOLOGY	ID	Description	GeneRatio	BgRatio	pvalue	p.adjust	qvalue	geneID	Count	cluster
ANGPTL7	blue		CC	GO:0030312	external encapsulating structure	6/28	139/10372	1.54e-06	4.46e-05	3.34e-05	TGFBI/ITGB4/LAMC2/TGM2/SPARC/VIT	6	blue
CLU	blue		CC	GO:0031012	extracellular matrix	6/28	139/10372	1.54e-06	4.46e-05	3.34e-05	TGFBI/ITGB4/LAMC2/TGM2/SPARC/VIT	6	blue
COL17A1	blue		CC	GO:0009986	cell surface	5/28	274/10372	0.000740312	0.00920102	0.00690216	CLU/ITGB4/ITGB1/SPARC/PLAU	5	blue
COL7A1	blue		CC	GO:0098636	protein complex involved in cell adhesion	4/28	26/10372	6.1e-07	4.46e-05	3.34e-05	ITGB4/ITGA6/ITGB1/PLAU	4	blue
CPXM2	blue		BP	GO:0007229	integrin-mediated signaling pathway	4/26	51/9280	1.11e-05	0.00697066	0.00587003	PTN/ITGB4/ITGA6/ITGB1	4	blue
CRIM1	blue		CC	GO:0008305	integrin complex	3/28	18/10372	1.4e-05	0.000304366	0.00022832	ITGB4/ITGA6/ITGB1	3	blue
CRLF1	blue		CC	GO:0031965	nuclear membrane	3/28	110/10372	0.00313493	0.0303043	0.0227328	IFI27/ITGB4/SYNE1	3	blue
CXCL14	blue		MF	GO:0008270	zinc ion binding	8/32	497/9563	0.000174792	0.0178288	0.0125114	MMP1/CA12/SRSF7/TIMP3/TIMP1/MMP10/TNFSF10/MT3	8	green
ENSMFAG00000000085	blue		BP	GO:0051248	negative regulation of protein metabolic process	7/34	344/9280	0.000204862	0.0226583	0.0188832	IGFBP5/GADD45B/TIMP3/TIMP1/PLAT/MT3/NTRK2	7	green
ENSMFAG00000003078	blue		CC	GO:0005615	extracellular space	7/37	479/10372	0.00132074	0.0390824	0.0360604	IGFBP5/CXCL6/PLTP/TIMP1/PLAT/TNFSF10/IGF2	7	green
ENSMFAG00000003315	blue		BP	GO:0007169	transmembrane receptor protein tyrosine kinase signaling pathway	6/34	216/9280	0.000115652	0.0226583	0.0188832	DCN/TXNIP/IGFBP5/PLAT/MT3/NTRK2	6	green
ENSMFAG00000036985	blue		MF	GO:0048018	receptor ligand activity	5/32	257/9563	0.00149844	0.0409135	0.0287112	PENK/CXCL6/TIMP1/TNFSF10/IGF2	5	green
ENSMFAG00000043412	blue		MF	GO:0030546	signaling receptor activator activity	5/32	261/9563	0.00160445	0.0409135	0.0287112	PENK/CXCL6/TIMP1/TNFSF10/IGF2	5	green
GJB6	blue		BP	GO:0001666	response to hypoxia	4/34	76/9280	0.000159905	0.0226583	0.0188832	AQP3/EPAS1/PLAT/MT3	4	green
HMOX1	blue		BP	GO:0036293	response to decreased oxygen levels	4/34	77/9280	0.000168231	0.0226583	0.0188832	AQP3/EPAS1/PLAT/MT3	4	green
HSP90B1	blue		BP	GO:0045861	negative regulation of proteolysis	4/34	78/9280	0.000176867	0.0226583	0.0188832	TIMP3/TIMP1/PLAT/MT3	4	green
HTRA1	blue		BP	GO:0070482	response to oxygen levels	4/34	83/9280	0.000224925	0.0226583	0.0188832	AQP3/EPAS1/PLAT/MT3	4	green
IFI27	blue		BP	GO:0052547	regulation of peptidase activity	4/34	100/9280	0.000459318	0.0406752	0.0338982	TIMP3/TIMP1/TNFSF10/MT3	4	green
IGFBP7	blue		CC	GO:0030312	external encapsulating structure	4/37	139/10372	0.0014475	0.0390824	0.0360604	MMP1/TIMP3/TIMP1/MMP10	4	green
ITGA6	blue		CC	GO:0031012	extracellular matrix	4/37	139/10372	0.0014475	0.0390824	0.0360604	MMP1/TIMP3/TIMP1/MMP10	4	green
ITGB1	blue		MF	GO:0004857	enzyme inhibitor activity	4/32	189/9563	0.0034472	0.0482018	0.0338258	TXNIP/TIMP3/TIMP1/MT3	4	green
ITGB4	blue		BP	GO:2001238	positive regulation of extrinsic apoptotic signaling pathway	3/34	20/9280	4.91e-05	0.0226583	0.0188832	G0S2/TIMP3/TNFSF10	3	green
IVNS1ABP	blue		BP	GO:0010466	negative regulation of peptidase activity	3/34	33/9280	0.000227436	0.0226583	0.0188832	TIMP3/TIMP1/MT3	3	green
LAMA3	blue		MF	GO:0019838	growth factor binding	3/32	60/9563	0.00102328	0.0409135	0.0287112	IGFBP2/IGFBP5/NTRK2	3	green
LAMC2	blue		MF	GO:0004866	endopeptidase inhibitor activity	3/32	99/9563	0.00429371	0.0482018	0.0338258	TIMP3/TIMP1/MT3	3	green
NQO1	blue		MF	GO:0061135	endopeptidase regulator activity	3/32	102/9563	0.00466848	0.0482018	0.0338258	TIMP3/TIMP1/MT3	3	green
PLAU	blue		BP	GO:0070141	response to UV-A	2/34	10/9280	0.000575657	0.0458799	0.0382358	MMP1/TIMP1	2	green
PTN	blue		MF	GO:0005518	collagen binding	2/32	28/9563	0.00388392	0.0482018	0.0338258	DCN/ITGA2	2	green
RBP1	blue		BP	GO:0098609	cell-cell adhesion	9/58	316/9280	0.000134339	0.0126391	0.0116781	PERP/DSP/DSC2/CLDN1/PKP1/IL18/PCK1/DSG3/S100A9	9	red
SLC12A7	blue		BP	GO:0043588	skin development	8/58	109/9280	3.29e-07	0.000318768	0.00029453	DSP/CLDN1/EVPL/CLDN4/SCEL/CYP26B1/IL18/ST14	8	red
SLC2A1	blue		CC	GO:0005911	cell-cell junction	8/66	184/10372	2.01e-05	0.00125607	0.00115294	DSP/DSC2/CLDN1/CLDN7/CLDN4/GJB4/PKP1/DSG3	8	red
SNCG	blue		BP	GO:0048871	multicellular organismal homeostasis	8/58	201/9280	3.19e-05	0.00450191	0.00415962	CLDN1/CLDN4/RB1/SCNN1A/CYP26B1/IL18/PLAC8/HOMER2	8	red
SPARC	blue		BP	GO:0008544	epidermis development	6/58	115/9280	7.61e-05	0.00954437	0.00881867	DSP/EVPL/SCEL/CYP26B1/ZNF750/ST14	6	red
SYNE1	blue		MF	GO:0030246	carbohydrate binding	6/59	156/9563	0.000377838	0.0281604	0.0257761	LGALS3/PYGL/CLEC7A/GALNT3/PPP1R3C/LGALSL	6	red
TGFBI	blue		BP	GO:0050891	multicellular organismal water homeostasis	5/58	28/9280	7.04e-07	0.000318768	0.00029453	CLDN1/CLDN4/SCNN1A/CYP26B1/IL18	5	red
TGM2	blue		BP	GO:0030104	water homeostasis	5/58	29/9280	8.47e-07	0.000318768	0.00029453	CLDN1/CLDN4/SCNN1A/CYP26B1/IL18	5	red
TKT	blue		BP	GO:0030216	keratinocyte differentiation	5/58	50/9280	1.37e-05	0.00257283	0.00237721	DSP/EVPL/SCEL/CYP26B1/ST14	5	red
TPM1	blue		BP	GO:0010952	positive regulation of peptidase activity	5/58	54/9280	2e-05	0.00322954	0.00298399	PERP/ASPH/CLDN4/CLEC7A/S100A9	5	red
TXNDC17	blue		BP	GO:0052547	regulation of peptidase activity	5/58	100/9280	0.000383025	0.0254374	0.0235033	PERP/ASPH/CLDN4/CLEC7A/S100A9	5	red
VIM	blue		CC	GO:0001533	cornified envelope	4/66	16/10372	2.57e-06	0.000321207	0.000294835	DSP/DSC2/EVPL/DSG3	4	red
VIT	blue		MF	GO:0031406	carboxylic acid binding	4/59	61/9563	0.000524727	0.0281604	0.0257761	PYGL/CYP26B1/CYP26A1/PCK1	4	red
ANXA5	green		BP	GO:0090303	positive regulation of wound healing	3/58	21/9280	0.000284489	0.0214125	0.0197845	CLDN1/CLDN4/CLEC7A	3	red
APOE	green		MF	GO:0033293	monocarboxylic acid binding	3/59	22/9563	0.000316059	0.0281604	0.0257761	PYGL/CYP26B1/CYP26A1	3	red
AQP3	green
BCAM	green
CA12	green
CAVIN1	green
CD44	green
CITED2	green
CSRP2	green
CXCL6	green
DCN	green
DPYSL3	green
DST	green
EMP3	green
ENSMFAG00000008326	green
ENSMFAG00000031087	green
ENSMFAG00000037375	green
ENSMFAG00000039064	green
ENSMFAG00000040595	green
ENSMFAG00000040972	green
ENSMFAG00000041970	green
ENSMFAG00000043579	green
EPAS1	green
G0S2	green
GADD45B	green
GPNMB	green
GSTM5	green
H2AX	green
ID2	green
ID3	green
IFITM1	green
IGF2	green
IGFBP2	green
IGFBP3	green
IGFBP5	green
IMPAD1	green
ITGA2	green
JUNB	green
KRT15	green
KRT19	green
MMP1	green
MMP10	green
MT3	green
NTRK2	green
PDLIM1	green
PENK	green
PLAT	green
PLK2	green
PLTP	green
S100A2	green
SCARA3	green
SGK1	green
SLC2A14	green
SOCS3	green
SRSF7	green
TIMP1	green
TIMP3	green
TNFSF10	green
TNS4	green
TSC22D1	green
TXNIP	green
VMO1	green
ZFP36L2	green
ADGRF1	red
ADH1B	red
ADIRF	red
AGPAT2	red
AGR2	red
ALDH1A1	red
APOBEC3A	red
ARF6	red
ASPH	red
BCL2L13	red
CD109	red
CD55	red
CLCF1	red
CLDN1	red
CLDN4	red
CLDN7	red
CLEC7A	red
CPEB4	red
CRTAC1	red
CRYBG1	red
CSTB	red
CTSC	red
CYP26A1	red
CYP26B1	red
CYSRT1	red
DAPL1	red
DENND2C	red
DSC2	red
DSG1	red
DSG3	red
DSP	red
EHF	red
ELF3	red
EMB	red
EMP1	red
EMP2	red
ENSMFAG00000001435	red
ENSMFAG00000001776	red
ENSMFAG00000032417	red
ENSMFAG00000032662	red
ENSMFAG00000034636	red
ENSMFAG00000037676	red
ENSMFAG00000041417	red
ENSMFAG00000043424	red
ENSMFAG00000044185	red
ENSMFAG00000045321	red
ERICH5	red
EVPL	red
FAM83A	red
GALNT3	red
GIPC1	red
GJB4	red
GPX1	red
HOMER2	red
HOPX	red
HSPB1	red
IL18	red
KRT12	red
KRT24	red
KRT3	red
KRT6A	red
LGALS3	red
LGALSL	red
LMO7	red
LY6D	red
LY6G6C	red
LYNX1-SLURP2	red
LYPD2	red
LYPD3	red
LYZ	red
MAL	red
MAL2	red
MALL	red
MFSD4A	red
MGARP	red
MUC22	red
MYH14	red
NBEAL2	red
PCK1	red
PERP	red
PHLDA2	red
PKP1	red
PLAAT2	red
PLAC8	red
PPP1R3C	red
PRDX5	red
PTGS2	red
PVRL4	red
PYGL	red
RAB11FIP1	red
RAB25	red
RB1	red
RHOD	red
RHOV	red
RIDA	red
RND3	red
S100A4	red
S100A9	red
SAT1	red
SCEL	red
SCNN1A	red
SDC1	red
SERPINB1	red
SERPINB2	red
SOD3	red
SPINK5	red
ST14	red
TACSTD2	red
TMEM40	red
TMPRSS11D	red
TNNT3	red
TOM1L1	red
TP53I3	red
TRIM36	red
TUBB2A	red
UACA	red
UBE2Q2	red
UPK1B	red
ZNF750	red

## Sheet: Isoform
Time differential isoform	cluster		GO analysis
PB.3575.9659(KRT3~NNC)	green		ONTOLOGY	ID	Description	GeneRatio	BgRatio	pvalue	p.adjust	qvalue	geneID	Count	cluster
PB.18116.1050(CLDN7~NNC)	green		CC	GO:0005911	cell-cell junction	18/312	184/10372	1.05e-05	0.00130699	0.00121819	DSG3/CLDN7/DSC2/PKP1/MPP7/CLDN1/OCLN/STRN/RAP2B/CRB3/PRKCD/CDH1/MARVELD2/PRKCH/SPTBN2/PARD6B/ACTR3/DSP	18	blue
PB.60149.240(LYPD2~NNC)	green		BP	GO:0043588	skin development	12/275	109/9280	8.73e-05	0.0433412	0.04088	ZFP36/TMEM79/KRT27/SCEL/CERS3/TGM1/UGCG/CLDN1/IL18/PRKCH/OPN3/DSP	12	blue
PB.10605.20(MAL~FSM)	green		BP	GO:0009913	epidermal cell differentiation	11/275	73/9280	8.82e-06	0.0165528	0.0156128	MAFF/SULT2B1/ZFP36/TMEM79/SCEL/CERS3/TGM1/UGCG/PRKCH/OPN3/DSP	11	blue
PB.65364.368(LYPD3~FSM)	green		CC	GO:0043296	apical junction complex	10/312	61/10372	1.21e-05	0.00130699	0.00121819	CLDN7/MPP7/CLDN1/OCLN/STRN/RAP2B/CRB3/CDH1/MARVELD2/PARD6B	10	blue
PB.40967.90(CLDN4~FSM)	green		BP	GO:0030216	keratinocyte differentiation	9/275	50/9280	1.33e-05	0.0165528	0.0156128	ZFP36/TMEM79/SCEL/CERS3/TGM1/UGCG/PRKCH/OPN3/DSP	9	blue
PB.11608.2(SDC1~NNC)	green		BP	GO:0045216	cell-cell junction organization	9/275	59/9280	5.3e-05	0.0328709	0.0310042	F2RL1/CLDN1/OCLN/PERP/CDH1/MARVELD2/PRKCH/PARD6B/DSP	9	blue
PB.62303.625(ADIRF~NIC)	green		CC	GO:0001533	cornified envelope	6/312	16/10372	4.38e-06	0.00130699	0.00121819	DSG3/DSC2/CNFN/SERPINB5/PI3/DSP	6	blue
PB.18846.2216(KRT12~FSM)	green		BP	GO:0019637	organophosphate metabolic process	48/468	447/9280	4.49e-07	0.000330515	0.000296647	AGPAT2/TP53I3/XDH/PMVK/SERINC2/DGKA/PLA2G4F/MOCOS/KMO/CDS1/NADSYN1/MVD/AK3/PDK3/MTMR3/PLA2G4A/CHP1/PSEN1/SOCS6/RBKS/PPCS/HMGCS1/ACLY/ATP6V1B1/GNAI3/IDI1/MBOAT1/NAPRT/HK2/PLA2G12A/HMGCR/ADSS2/PGD/G6PD/DLST/NT5C3A/SERINC3/ACACA/ABHD5/ATP5IF1/SERAC1/GDE1/BAD/SYNJ1/ATP5F1C/NAMPT/GPD1/PGS1	48	green
PB.42937.882(PERP~NNC)	green		BP	GO:0044255	cellular lipid metabolic process	46/468	432/9280	1.01e-06	0.00051261	0.000460082	AGPAT2/PMVK/SERINC2/DEGS2/PCK1/CD74/KIT/DGKA/PLA2G4F/ORMDL2/CDS1/CYP26B1/MVD/PDK3/MTMR3/HSD17B5/PLA2G4A/CHP1/WDTC1/CYP26A1/SOCS6/ETFBKMT/MT3/INSIG1/HMGCS1/AACS/ATP6V1B1/MGST2/IDI1/MBOAT1/PLA2G12A/CERS4/LSS/HMGCR/KLF5/ECI1/SERINC3/ACACA/ABHD5/SESN2/SERAC1/GDE1/SYNJ1/GGPS1/PGS1/PSAP	46	green
PB.54285.948(RHOV~FSM)	green		BP	GO:1901700	response to oxygen-containing compound	44/468	480/9280	7.71e-05	0.0100452	0.00901585	RB1/PIM1/CPEB4/PID1/PCK1/ERBIN/HOMER2/JUP/OXR1/AKIRIN2/CYP26B1/HSD17B2/PDK3/HSD17B5/MDM2/WDTC1/RORC/GPR37/PSEN1/MT3/INSIG1/EZR/NCK1/RDH12/SLC12A6/GNAI3/SORT1/CD6/CFTR/VSNL1/ZFP36/FDX1/RRAGC/THBS1/PLK3/ACACA/NSG1/SESN2/UBR2/ALAS1/PPP1R15B/BAD/KCNMA1/IRF3	44	green
PB.18846.2345(KRT12~NNC)	green		BP	GO:0019220	regulation of phosphate metabolic process	42/468	472/9280	0.000216524	0.0200383	0.017985	RB1/CLCF1/CCND1/XDH/PPP1R14C/CD74/KIT/RAP2B/ACSL1/TOM1L1/NRBF2/EPHA1/CHP2/SLC9A3R1/EPGN/PDK3/MTMR3/AKTIP/STK38/GSKIP/CHP1/PSEN1/TNIK/MT3/CBLC/ITGB1BP1/NCK1/COPS8/PPP1R15A/DUSP22/CDKN2B/RB1CC1/HMGCR/KLF5/THBS1/ATP5IF1/SESN2/FLOT1/PPP1R15B/BAD/MAP3K13/KCTD20	42	green
PB.3575.12430(KRT3~ISM)	green		BP	GO:0051174	regulation of phosphorus metabolic process	42/468	472/9280	0.000216524	0.0200383	0.017985	RB1/CLCF1/CCND1/XDH/PPP1R14C/CD74/KIT/RAP2B/ACSL1/TOM1L1/NRBF2/EPHA1/CHP2/SLC9A3R1/EPGN/PDK3/MTMR3/AKTIP/STK38/GSKIP/CHP1/PSEN1/TNIK/MT3/CBLC/ITGB1BP1/NCK1/COPS8/PPP1R15A/DUSP22/CDKN2B/RB1CC1/HMGCR/KLF5/THBS1/ATP5IF1/SESN2/FLOT1/PPP1R15B/BAD/MAP3K13/KCTD20	42	green
PB.60149.404(LYNX1-SLURP2~FSM)	green		CC	GO:0005768	endosome	39/495	368/10372	2.2e-06	0.000846186	0.000726459	ARF6/F2RL1/ATP6V1E1/CD74/CHMP2B/RAP2B/VPS4B/TOM1L1/NPC1/RAB5A/CLIP1/CDK16/PSEN1/UBE2D3/RAB17/AP5M1/WDFY2/EZR/ANXA1/SORL1/BOK/VPS18/VPS36/GGA1/PLEKHM1/SORT1/STARD3NL/RAB10/NIPA2/CFTR/THSD1/UBAP1/NSG1/SLC31A2/SLC48A1/ANXA2/FLOT1/CLTC/OSBPL6	39	green
PB.23012.1174(DSG1~ISM)	green		BP	GO:0030163	protein catabolic process	37/468	430/9280	0.000964001	0.043861	0.0393665	CHMP2B/VPS4B/ASB2/RAD23B/AKIRIN2/MDM2/NTAN1/PSEN1/SOCS6/UBE2D3/CBLC/TMEM199/KCTD17/LNX1/EZR/UBB/KCTD10/USP46/VPS36/GGA1/GIPC1/HMGCR/PDCD6IP/SKP1/NRDC/ECRG4/UBAP1/PLK3/PSME4/ATP5IF1/UBXN1/MARCHF6/ZFAND2B/ANXA2/UBR2/PSMC1/RNF144B	37	green
PB.23012.1585(DSG1~ISM)	green		CC	GO:0098827	endoplasmic reticulum subcompartment	37/495	456/10372	0.00106321	0.0194921	0.0167342	DEGS2/ASPH/RAB18/SEC16B/ORMDL2/HSD17B2/ANXA7/SLC37A1/MOSPD3/DIPK1B/CDK16/PSEN1/INSIG1/TMEM199/ATL2/SORL1/BOK/MGST2/GNAI3/TTYH1/STARD3NL/RAB10/RAB2A/CFTR/CERS4/CYP51A1/LMBR1L/SEC61G/HMGCR/TECR/EMC7/NSG1/UBXN1/RTN3/MARCHF6/YIPF5/OSBPL6	37	green
PB.10605.1(MAL~NNC)	green		CC	GO:0042175	nuclear outer membrane-endoplasmic reticulum membrane network	36/495	460/10372	0.00231163	0.0317849	0.0272876	DEGS2/ASPH/SEC16B/ORMDL2/HSD17B2/ANXA7/SLC37A1/MOSPD3/DIPK1B/CDK16/PSEN1/INSIG1/TMEM199/ATL2/SORL1/BOK/MGST2/GNAI3/TTYH1/STARD3NL/RAB10/RAB2A/CFTR/CERS4/CYP51A1/LMBR1L/SEC61G/HMGCR/TECR/EMC7/NSG1/UBXN1/RTN3/MARCHF6/YIPF5/OSBPL6	36	green
PB.38886.294(ENSMFAG00000045321~NNC)	green		BP	GO:1901701	cellular response to oxygen-containing compound	34/468	368/9280	0.000440917	0.0274808	0.0246648	RB1/PIM1/CPEB4/PID1/PCK1/JUP/OXR1/CYP26B1/PDK3/HSD17B5/MDM2/WDTC1/RORC/GPR37/PSEN1/MT3/INSIG1/EZR/NCK1/RDH12/SLC12A6/GNAI3/CD6/CFTR/VSNL1/ZFP36/FDX1/RRAGC/ACACA/NSG1/SESN2/UBR2/BAD/IRF3	34	green
PB.16246.186(ALDH1A1~FSM)	green		CC	GO:0012506	vesicle membrane	32/495	334/10372	0.000130307	0.0125421	0.0107675	ARF6/ATP6V1E1/CHMP2B/RAP2B/VPS4B/ANXA7/EPGN/RAB5A/CDK16/PSEN1/UBE2D3/RAB17/TMEM199/AP5M1/ANXA1/SORL1/NCK1/BOK/AFTPH/VPS36/GGA1/SORT1/STARD3NL/CFTR/GIPC1/UBAP1/NSG1/SLC48A1/ANXA2/SPIRE1/CLTC/OSBPL6	32	green
PB.54285.937(RHOV~NIC)	green		BP	GO:0051336	regulation of hydrolase activity	31/468	289/9280	5.42e-05	0.00919511	0.00825287	CLDN4/PERP/GSN/CLEC7A/XDH/F2RL1/RASGRP2/ASPH/TIAM1/EPHA1/CHP2/ARAP2/CHP1/MT3/ITGB1BP1/CAST/PPP1R15A/BOK/RASAL2/TDG/SORT1/SOX7/THBS1/NRDC/ABHD5/ATP5IF1/UBXN1/GPR137B/MGMT/BAD/MUL1	31	green
PB.61000.9(ENSMFAG00000043424~FSM)	green		BP	GO:0030029	actin filament-based process	30/468	328/9280	0.00111469	0.0466339	0.0418553	GSN/F2RL1/DSP/NOTCH2/KIT/NUAK2/SCIN/EPHA1/JUP/ASB2/CDC42BPB/TMOD3/TNIK/EPB41L1/BAIAP2/SPTAN1/EZR/ITGB1BP1/NCK1/FARP2/CACNB2/DSTN/TRIP10/ARHGAP12/DAAM1/WDR1/CAPZB/SPIRE1/ABI1/ACTR2	30	green
PB.30231.2062(S100A4~FSM)	green		BP	GO:0006914	autophagy	26/468	228/9280	7.89e-05	0.0100452	0.00901585	TRIM36/CHMP2B/VPS4B/SEC16B/NRBF2/ATG4A/ANXA7/MTMR3/NPC1/PSEN1/MT3/FNBP1L/BOK/IFT20/GNAI3/HK2/PLEKHM1/RB1CC1/SH3GLB1/CISD1/PLK3/ATP5IF1/SESN2/GPR137B/CISD2/MUL1	26	green
PB.11950.49(PRDX5~FSM)	green		BP	GO:0061919	process utilizing autophagic mechanism	26/468	228/9280	7.89e-05	0.0100452	0.00901585	TRIM36/CHMP2B/VPS4B/SEC16B/NRBF2/ATG4A/ANXA7/MTMR3/NPC1/PSEN1/MT3/FNBP1L/BOK/IFT20/GNAI3/HK2/PLEKHM1/RB1CC1/SH3GLB1/CISD1/PLK3/ATP5IF1/SESN2/GPR137B/CISD2/MUL1	26	green
PB.62303.626(ADIRF~FSM)	green		BP	GO:0061024	membrane organization	26/468	269/9280	0.00106647	0.0452362	0.0406008	GSN/F2RL1/CHMP2B/VPS4B/SEC16B/TMCC1/NPC1/MT3/INSIG1/BAIAP2/ATL2/LMNB1/BOK/HK2/PLEKHM1/SH3GLB1/PDCD6IP/THBS1/EMC7/ARHGAP12/ATP5IF1/ANXA2/OSBPL2/FLOT1/BAD/MUL1	26	green
PB.42937.111(PERP~FSM)	green		BP	GO:0010638	positive regulation of organelle organization	25/468	214/9280	7.29e-05	0.0100452	0.00901585	RB1/GSN/F2RL1/SCIN/VPS4B/EPHA1/EPGN/CLIP1/KCTD17/ITGB1BP1/NCK1/BOK/IFT20/SH3GLB1/RAD21/PDCD6IP/DSTN/ATP5IF1/WDR1/ANXA2/SPIRE1/BAD/SYNJ1/MUL1/MFF	25	green
PB.16671.1(AGPAT2~FSM)	green		CC	GO:0099513	polymeric cytoskeletal fiber	25/495	291/10372	0.00318662	0.0408949	0.0351087	KRT12/DSP/CHMP2B/JUP/SHTN1/KRT5/CLIP1/EZR/KATNAL2/LMNB1/PAFAH1B1/VPS18/DUSP22/CLASP1/MTUS2/KIF1C/KIF16B/RAB3D/HOOK1/MACF1/NIN/CAMSAP2/KIF5B/CLTC/STAU2	25	green
PB.11608.1(SDC1~NNC)	green		BP	GO:0010256	endomembrane system organization	24/468	222/9280	0.000333131	0.0231302	0.02076	GSN/CHMP2B/RAB18/VPS4B/SEC16B/AKTIP/TMCC1/SHTN1/BAIAP2/ATL2/LMNB1/VPS18/GCC2/RAB10/RAB2A/SH3GLB1/ARMH3/EMC7/HOOK1/PLK3/CAMSAP2/OSBPL2/FLOT1/SYNJ1	24	green
PB.23012.1423(DSG1~NNC)	green		BP	GO:0045859	regulation of protein kinase activity	22/468	207/9280	0.000736166	0.0374709	0.0336312	RB1/CCND1/KIT/RAP2B/ACSL1/EPHA1/SLC9A3R1/EPGN/STK38/GSKIP/PSEN1/MT3/CBLC/ITGB1BP1/COPS8/DUSP22/CDKN2B/HMGCR/KLF5/THBS1/SESN2/MAP3K13	22	green
PB.28668.73(SH3BGRL3~NIC)	green		BP	GO:1901699	cellular response to nitrogen compound	22/468	211/9280	0.000951434	0.043861	0.0393665	SCNN1A/RB1/CPEB4/PID1/PCK1/JUP/MDM2/WDTC1/PSEN1/MT3/EZR/NCK1/GNAI3/PQBP1/CFTR/FDX1/RRAGC/NSG1/SESN2/UBR2/FLOT1/MUL1	22	green
PB.48169.1311(MGARP~FSM)	green		CC	GO:0005911	cell-cell junction	21/495	184/10372	0.000180557	0.0131306	0.0112728	CLDN7/CLDN4/CLDN1/CTNND1/CCND1/DSP/DSC2/KIT/RAP2B/TIAM1/JUP/CRB3/MAGI3/CDK16/FRMD4B/PKP1/NCK1/MARVELD2/GJB4/WDR1/FLOT1	21	green
PB.4815.2(EMP1~NIC)	green		BP	GO:0043086	negative regulation of catalytic activity	20/468	175/9280	0.000504498	0.0285456	0.0256205	RB1/EPHA1/STK38/GSKIP/CHP1/PSEN1/ETFBKMT/MT3/CBLC/ITGB1BP1/CAST/PPP1R15A/DUSP22/GALR2/SORT1/HMGCR/ZFP36/THBS1/ATP5IF1/UBXN1	20	green
PB.61119.9(ERICH5~FSM)	green		CC	GO:0045177	apical part of cell	20/495	154/10372	4.21e-05	0.00539931	0.00463536	CLDN1/SCNN1A/ATP6V1E1/RAB18/HOMER2/ERBB3/CRB3/SLC9A3R1/MYO5B/CHL1/TNIK/RAB17/EZR/ANXA1/ATP6V1B1/MARVELD2/CFTR/ECRG4/NIN/KCNMA1	20	green
PB.18846.5018(KRT12~FSM)	green		BP	GO:0052547	regulation of peptidase activity	16/468	100/9280	3.61e-05	0.00734196	0.00658962	CLDN4/PERP/GSN/CLEC7A/XDH/ASPH/MT3/CAST/BOK/SOX7/THBS1/NRDC/UBXN1/MGMT/BAD/MUL1	16	green
PB.17669.2(ENSMFAG00000032662~FSM)	green		BP	GO:0045862	positive regulation of proteolysis	16/468	118/9280	0.000270197	0.021793	0.0195598	CLDN4/PERP/GSN/CLEC7A/XDH/ASPH/MDM2/PSEN1/BOK/SOX7/NRDC/PLK3/ATP5IF1/ANXA2/BAD/MUL1	16	green
PB.29701.2(ELF3~NIC)	green		BP	GO:0032386	regulation of intracellular transport	15/468	119/9280	0.000909881	0.0434184	0.0389692	SEC16B/JUP/CHP2/CHP1/PSEN1/INSIG1/EZR/ITGB1BP1/GCC2/PLK3/ATP5IF1/ANXA2/YIPF5/MFF/PPP1CC	15	green
PB.8261.10(DAPL1~FSM)	green		CC	GO:0016324	apical plasma membrane	15/495	118/10372	0.000475019	0.0165576	0.0142149	CLDN1/SCNN1A/ATP6V1E1/RAB18/ERBB3/SLC9A3R1/TNIK/RAB17/EZR/ANXA1/ATP6V1B1/MARVELD2/CFTR/ECRG4/KCNMA1	15	green
PB.36252.12(CLDN1~NNC)	green		BP	GO:0016125	sterol metabolic process	12/468	65/9280	8.22e-05	0.0100464	0.00901696	PMVK/MVD/DHCR7/MT3/INSIG1/HMGCS1/IDI1/CFTR/CYP51A1/HMGCR/FDX1/FDFT1	12	green
PB.31926.562(EMP2~FSM)	green		CC	GO:0016323	basolateral plasma membrane	12/495	75/10372	0.000204633	0.0131306	0.0112728	CLDN7/CLDN1/DSP/ERBIN/ERBB3/RAB17/ANXA1/SLC12A6/ATP6V1B1/MARVELD2/ANXA2/FLOT1	12	green
PB.55871.56(ZFP36L1~FSM)	green		CC	GO:0019867	outer membrane	12/495	81/10372	0.000427279	0.0165576	0.0142149	KMO/PSEN1/UBB/HK2/SH3GLB1/CISD1/SPIRE1/CISD2/BAD/MUL1/MFF/PPP1CC	12	green
PB.18846.2132(KRT12~FSM)	green		CC	GO:0031968	organelle outer membrane	12/495	81/10372	0.000427279	0.0165576	0.0142149	KMO/PSEN1/UBB/HK2/SH3GLB1/CISD1/SPIRE1/CISD2/BAD/MUL1/MFF/PPP1CC	12	green
PB.55871.320(ZFP36L1~NNC)	green		CC	GO:0045178	basal part of cell	12/495	87/10372	0.00082688	0.017686	0.0151836	CLDN7/CLDN1/DSP/ERBIN/ERBB3/RAB17/ANXA1/SLC12A6/ATP6V1B1/MARVELD2/ANXA2/FLOT1	12	green
PB.11578.19(TP53I3~FSM)	green		CC	GO:0005938	cell cortex	12/495	97/10372	0.00216012	0.0317849	0.0272876	GSN/ASPH/EXOC6/MYO5B/PSEN1/FNBP1L/SPTAN1/PAFAH1B1/GIPC1/TRIP10/FLOT1/EXOC5	12	green
PB.59650.330(RIDA~FSM)	green		BP	GO:1902652	secondary alcohol metabolic process	11/468	65/9280	0.000359852	0.0233827	0.0209867	PMVK/MVD/DHCR7/MT3/INSIG1/HMGCS1/IDI1/CFTR/CYP51A1/HMGCR/FDX1	11	green
PB.67213.52(SAT1~FSM)	green		CC	GO:0098858	actin-based cell projection	11/495	74/10372	0.000714163	0.0165576	0.0142149	ARF6/ACTG2/HOMER2/SLC9A3R1/SHTN1/BAIAP2/EZR/IFT20/ATP6V1B1/TTYH1/ABI1	11	green
PB.6510.59(RND3~NIC)	green		BP	GO:0016126	sterol biosynthetic process	10/468	24/9280	1e-07	0.000305913	0.000274566	PMVK/MVD/DHCR7/INSIG1/HMGCS1/IDI1/CFTR/CYP51A1/HMGCR/FDFT1	10	green
PB.31885.1005(PPL~ISM)	green		CC	GO:0005777	peroxisome	10/495	63/10372	0.000731115	0.0165576	0.0142149	PRDX5/RIDA/XDH/IDI1/DDO/HMGCR/TRIM37/PXMP2/MUL1/MFF	10	green
PB.2918.739(SCNN1A~NNC)	green		CC	GO:0042579	microbody	10/495	63/10372	0.000731115	0.0165576	0.0142149	PRDX5/RIDA/XDH/IDI1/DDO/HMGCR/TRIM37/PXMP2/MUL1/MFF	10	green
PB.16246.697(ALDH1A1~FSM)	green		BP	GO:1902653	secondary alcohol biosynthetic process	9/468	22/9280	5.4e-07	0.000330515	0.000296647	PMVK/MVD/DHCR7/INSIG1/HMGCS1/IDI1/CFTR/CYP51A1/HMGCR	9	green
PB.62348.47(PPIF~FSM)	green		BP	GO:0072524	pyridine-containing compound metabolic process	9/468	31/9280	1.46e-05	0.00494113	0.0044348	TP53I3/KMO/NADSYN1/RBKS/NAPRT/PGD/G6PD/PNPO/NAMPT	9	green
PB.3575.11965(KRT3~NNC)	green		BP	GO:0007041	lysosomal transport	9/468	41/9280	0.000161252	0.0169815	0.0152414	CHMP2B/VPS4B/AKTIP/SCYL2/VPS18/GCC2/PLEKHM1/SORT1/HOOK1	9	green
PB.21840.925(RB1~FSM)	green		BP	GO:2000377	regulation of reactive oxygen species metabolic process	9/468	47/9280	0.000479131	0.0285456	0.0256205	CLEC7A/XDH/F2RL1/CDKN1A/PDK3/HSD17B5/MT3/HK2/THBS1	9	green
PB.12834.460(CTSC~FSM)	green		BP	GO:0006084	acetyl-CoA metabolic process	8/468	21/9280	4.48e-06	0.00171094	0.00153562	PMVK/MVD/PDK3/PPCS/HMGCS1/ACLY/DLST/ACACA	8	green
PB.43358.552(CRYBG1~ISM)	green		BP	GO:0030834	regulation of actin filament depolymerization	8/468	30/9280	8.62e-05	0.0101271	0.00908939	GSN/F2RL1/SCIN/TMOD3/SPTAN1/DSTN/WDR1/CAPZB	8	green
PB.13526.564(CLCF1~NNC)	green		BP	GO:0030042	actin filament depolymerization	8/468	34/9280	0.00022382	0.0201043	0.0180442	GSN/F2RL1/SCIN/TMOD3/SPTAN1/DSTN/WDR1/CAPZB	8	green
PB.15355.37(GSN~FSM)	green		BP	GO:0035383	thioester metabolic process	8/468	38/9280	0.000504736	0.0285456	0.0256205	PMVK/MVD/PDK3/PPCS/HMGCS1/ACLY/DLST/ACACA	8	green
PB.30231.2106(S100A4~FSM)	green		BP	GO:1901879	regulation of protein depolymerization	8/468	39/9280	0.000607451	0.0331278	0.0297331	GSN/F2RL1/SCIN/TMOD3/SPTAN1/DSTN/WDR1/CAPZB	8	green
PB.18846.2210(KRT12~NIC)	green		CC	GO:0030175	filopodium	8/495	42/10372	0.000714104	0.0165576	0.0142149	ARF6/ACTG2/SLC9A3R1/SHTN1/BAIAP2/EZR/TTYH1/ABI1	8	green
PB.67213.48(SAT1~NNC)	green		BP	GO:0007032	endosome organization	7/468	24/9280	0.00012969	0.0141455	0.012696	CHMP2B/VPS4B/AKTIP/TMCC1/VPS18/HOOK1/SYNJ1	7	green
PB.57863.555(ARF6~NNC)	green		BP	GO:0051881	regulation of mitochondrial membrane potential	7/468	29/9280	0.000469622	0.0285456	0.0256205	PID1/UCP2/UBB/BOK/ATP5IF1/BAD/MUL1	7	green
PB.12042.409(CTNND1~NIC)	green		BP	GO:0006970	response to osmotic stress	6/468	20/9280	0.000336901	0.0231302	0.02076	OXSR1/KMO/SLC12A6/PLK3/BAD/KCNMA1	6	green
PB.18846.5136(KRT12~FSM)	green		BP	GO:0008333	endosome to lysosome transport	6/468	20/9280	0.000336901	0.0231302	0.02076	VPS4B/AKTIP/SCYL2/VPS18/SORT1/HOOK1	6	green
PB.23012.1388(DSG1~FSM)	green		BP	GO:0072525	pyridine-containing compound biosynthetic process	5/468	13/9280	0.000293239	0.0229629	0.0206098	KMO/NADSYN1/NAPRT/PNPO/NAMPT	5	green
PB.55871.321(ZFP36L1~FSM)	green		CC	GO:0001533	cornified envelope	5/495	16/10372	0.000683503	0.0165576	0.0142149	DSP/DSC2/JUP/CNFN/ANXA2	5	green
PB.55064.298(CIB1~NNC)	green		CC	GO:0033176	proton-transporting V-type ATPase complex	5/495	16/10372	0.000683503	0.0165576	0.0142149	ATP6V1E1/ATP6V1H/TMEM199/ATP6V1B1/ATP6V0A2	5	green
PB.41510.6(AGR2~FSM)	green		CC	GO:0016471	vacuolar proton-transporting V-type ATPase complex	4/495	11/10372	0.00129305	0.0226284	0.0194267	ATP6V1E1/ATP6V1H/TMEM199/ATP6V1B1	4	green
PB.3000.105(CLEC7A~ISM)	green		CC	GO:0005615	extracellular space	37/282	479/10372	7.64e-09	4.68e-07	4.4e-07	CLU/SPARC/TIMP1/SERPINH1/PLTP/CXCL6/EFEMP1/SERPING1/SERPINE2/TGFB1/IL33/PDGFC/FN1/CXCL8/SULF2/SPARCL1/PTN/TMEM98/IGFBP5/TNFSF10/CDH13/SERPINE1/LOXL2/MMP2/CXCL3/PLAT/PLAU/APP/MFGE8/MMP14/TGFBI/CXCL1/LRG1/PTX3/IGFBP4/SCGB2A1/CD63	37	red
PB.17632.194(OSTF1~FSM)	green		BP	GO:0040012	regulation of locomotion	33/247	397/9280	4.62e-09	5.88e-06	4.92e-06	DCN/SPARC/LAMC2/TIMP1/LAMA3/DPYSL3/TGFB1/DUSP1/IL33/RGCC/CCN1/FAM107A/WNT7A/FN1/CXCL8/PLK2/PTN/IGFBP5/NGFR/CDH13/NRP1/PIK3R1/ANXA3/PLAU/APP/HSPA5/WNT3/MMP14/PDGFB/ADAMTS1/GLUL/RHOB/PTGER4	33	red
PB.11578.7(TP53I3~NNC)	green		BP	GO:0030334	regulation of cell migration	31/247	353/9280	3.83e-09	5.88e-06	4.92e-06	DCN/SPARC/LAMC2/TIMP1/LAMA3/DPYSL3/TGFB1/DUSP1/IL33/RGCC/CCN1/FAM107A/WNT7A/FN1/PLK2/PTN/IGFBP5/NGFR/CDH13/NRP1/PIK3R1/ANXA3/PLAU/APP/HSPA5/MMP14/PDGFB/ADAMTS1/GLUL/RHOB/PTGER4	31	red
PB.36252.21(CLDN1~NNC)	green		BP	GO:0007167	enzyme-linked receptor protein signaling pathway	31/247	369/9280	1.11e-08	7.04e-06	5.89e-06	DCN/HSP90AB1/EFEMP1/TXNIP/TGFB1/DLL1/PDGFC/CCN1/SULF2/STMN1/ARID5B/CRIM1/IGFBP5/NGFR/CDH13/NRP1/SLC39A14/PIK3R1/NTRK2/PLAT/HSPA5/CHST11/PDGFB/COL4A5/FBN2/LRG1/MST1R/FGF12/NPPC/IGFBP4/CD63	31	red
PB.18846.3705(KRT12~NNC)	green		BP	GO:0048646	anatomical structure formation involved in morphogenesis	31/247	457/9280	1.36e-06	0.000144599	0.000121027	DCN/SPARC/TGM2/TGFB1/DLL1/RGCC/CCN1/ITGA2/WNT7A/FN1/CXCL8/PLK2/NGFR/CDH13/LOXL2/MMP2/NRP1/ANXA3/PARVA/MAFB/WNT3/MMP14/MEF2A/ADAMTS1/GLUL/RHOB/TGFBI/EPHB4/FBN2/LRG1/IRX3	31	red
PB.11876.97(CCND1~FSM)	green		BP	GO:0051241	negative regulation of multicellular organismal process	29/247	389/9280	4.49e-07	5.67e-05	4.74e-05	DCN/SPARC/ANXA5/TIMP1/HSP90AB1/EFEMP1/TGFB1/DLL1/IL33/RGCC/WNT7A/FN1/TRIB2/RGS2/PLK2/FRZB/PTN/TMEM98/IGFBP5/NGFR/LOXL2/PIK3R1/ANGPTL7/PLAU/MAFB/WNT3/PDGFB/ADAMTS1/PTGER4	29	red
PB.27401.612(TUFT1~FSM)	green		CC	GO:0030312	external encapsulating structure	29/282	139/10372	4.52e-18	5.54e-16	5.21e-16	MMP1/SPARC/LAMC2/TGM2/TIMP1/VIT/EFEMP1/TIMP3/TGFB1/P3H2/GPC3/WNT7A/FN1/POSTN/SPARCL1/FBLN2/MFAP2/GPC4/MMP13/MMP2/COL4A6/WNT3/MMP14/LTBP1/COL4A5/ADAMTS1/TGFBI/FBN2/PTX3	29	red
PB.11427.7(XDH~NNC)	green		CC	GO:0031012	extracellular matrix	29/282	139/10372	4.52e-18	5.54e-16	5.21e-16	MMP1/SPARC/LAMC2/TGM2/TIMP1/VIT/EFEMP1/TIMP3/TGFB1/P3H2/GPC3/WNT7A/FN1/POSTN/SPARCL1/FBLN2/MFAP2/GPC4/MMP13/MMP2/COL4A6/WNT3/MMP14/LTBP1/COL4A5/ADAMTS1/TGFBI/FBN2/PTX3	29	red
PB.44050.215(PIM1~FSM)	green		BP	GO:0051093	negative regulation of developmental process	28/247	358/9280	2.71e-07	4.31e-05	3.61e-05	DCN/SPARC/EFEMP1/TGFB1/DLL1/RGCC/WNT7A/TRIB2/CRIM1/PLK2/FRZB/PTN/TMEM98/IGFBP5/NGFR/LOXL2/TRIB3/PIK3R1/ANGPTL7/APP/ID3/MAFB/WNT3/PDGFB/ADAMTS1/NFE2L2/NPPC/IRX3	28	red
PB.30206.11(PMVK~FSM)	green		BP	GO:0009887	animal organ morphogenesis	28/247	404/9280	3.05e-06	0.000298873	0.000250152	AQP3/TGM2/TGFB1/DLL1/PDGFC/CCN1/WNT7A/SULF2/ARID5B/FRZB/PTN/IGFBP5/MFAP2/NGFR/MMP2/NRP1/NTRK2/PARVA/ID3/MMP14/CHST11/ANKH/ADAMTS1/FBN2/BARX2/NPPC/IRX3/NAB1	28	red
PB.57281.5(ZFAND6~NNC)	green		BP	GO:1901700	response to oxygen-containing compound	28/247	480/9280	7.31e-05	0.0037266	0.0031191	AQP3/TGM2/CXCL6/PDGFC/MAN1A1/CYP24A1/POSTN/CXCL8/CA2/IGFBP5/NGFR/CAT/LYPD1/DDIT4/MMP2/TRIB3/SLC39A14/SESN3/PIK3R1/NTRK2/APP/ID3/GLUL/RHOB/PARK7/NFE2L2/NET1/PTGER4	28	red
PB.46155.3(MTCH1~NNC)	green		MF	GO:0005509	calcium ion binding	28/254	392/9563	1.66e-06	0.000577172	0.000505785	S100A2/SPARC/ANXA5/TGM2/EFEMP1/FSTL1/DLL1/MAN1A1/MYL9/S100A13/SULF2/SPARCL1/FBLN2/FKBP7/CDH13/DLK2/LOXL2/ANXA3/CALU/LTBP1/HPCAL1/CAPN12/FBN2/PLA2G4E/NELL1/FBLN1/PCP4/FKBP9	28	red
PB.28604.198(SERINC2~NNC)	green		MF	GO:0044877	protein-containing complex binding	28/254	432/9563	1.07e-05	0.000855772	0.000749926	CLU/DCN/SPARC/CTNNAL1/SERPINH1/TAGLN/PLTP/CCN1/FSCN1/ITGA2/FN1/PI4K2A/PTN/CDH13/ITGB6/FLNA/FCGRT/PIK3R1/MFGE8/HSPA5/UBD/PDGFB/SMARCA1/HEXIM1/PARK7/TGFBI/PTX3/DSTN	28	red
PB.52975.1(F2RL1~FSM)	green		BP	GO:0071495	cellular response to endogenous stimulus	26/247	478/9280	0.000403354	0.0148949	0.0124667	TGM2/HSP90AB1/TGFB1/PDGFC/CCN1/WNT7A/CXCL8/SULF2/CRIM1/CA2/IGFBP5/NGFR/DDIT4/MMP2/TRIB3/SLC39A14/PIK3R1/NTRK2/APP/HSPA5/CHST11/PARK7/FBN2/LRG1/FGF12/SCGB2A1	26	red
PB.3575.12359(KRT3~ISM)	green		BP	GO:0001944	vasculature development	25/247	286/9280	1.51e-07	2.75e-05	2.3e-05	DCN/SPARC/TGFB1/DLL1/RGCC/CCN1/WNT7A/CXCL8/PLK2/NGFR/CDH13/LOXL2/MMP2/NRP1/ANXA3/NTRK2/PARVA/ANGPTL7/PDGFB/ADAMTS1/GLUL/RHOB/TGFBI/EPHB4/LRG1	25	red
PB.9662.180(ACTG2~FSM)	green		BP	GO:1901701	cellular response to oxygen-containing compound	22/247	368/9280	0.000318888	0.012311	0.0103041	TGM2/CXCL6/PDGFC/POSTN/CXCL8/CA2/IGFBP5/NGFR/CAT/LYPD1/DDIT4/MMP2/TRIB3/SLC39A14/PIK3R1/NTRK2/APP/ID3/RHOB/PARK7/NFE2L2/NET1	22	red
PB.2997.96(CLEC2B~FSM)	green		BP	GO:0051130	positive regulation of cellular component organization	22/247	402/9280	0.00104811	0.0303481	0.0254008	CLU/MMP1/DCN/DPYSL3/DLL1/RGCC/WNT7A/FN1/PTN/TNFSF10/PLEK2/NRP1/PIK3R1/NTRK2/APP/WNT3/S100A10/PDGFB/PARK7/IRX3/DSTN/CD63	22	red
PB.3575.10218(KRT3~NNC)	green		MF	GO:0030545	signaling receptor regulator activity	22/254	275/9563	3.77e-06	0.000577172	0.000505785	TIMP1/PENK/CXCL6/EFEMP1/TGFB1/IL33/PDGFC/GPHA2/WNT7A/CXCL8/PTN/TNFSF10/LYPD1/CXCL3/PGF/APP/WNT3/PDGFB/NRG1/CXCL1/FGF12/NPPC	22	red
PB.57863.475(ARF6~NNC)	green		MF	GO:0030546	signaling receptor activator activity	21/254	261/9563	5.77e-06	0.000577172	0.000505785	TIMP1/PENK/CXCL6/EFEMP1/TGFB1/IL33/PDGFC/GPHA2/WNT7A/CXCL8/PTN/TNFSF10/CXCL3/PGF/APP/WNT3/PDGFB/NRG1/CXCL1/FGF12/NPPC	21	red
PB.18846.2233(KRT12~NIC)	green		MF	GO:0048018	receptor ligand activity	20/254	257/9563	1.59e-05	0.00105877	0.000927815	TIMP1/PENK/CXCL6/EFEMP1/TGFB1/IL33/PDGFC/GPHA2/WNT7A/CXCL8/PTN/TNFSF10/CXCL3/PGF/WNT3/PDGFB/NRG1/CXCL1/FGF12/NPPC	20	red
PB.26616.225(PTGS2~FSM)	green		BP	GO:0045596	negative regulation of cell differentiation	19/247	252/9280	4.11e-05	0.00249222	0.00208594	EFEMP1/DLL1/WNT7A/TRIB2/CRIM1/FRZB/PTN/TMEM98/IGFBP5/TRIB3/PIK3R1/APP/ID3/MAFB/WNT3/PDGFB/NFE2L2/NPPC/IRX3	19	red
PB.28604.80(SERINC2~FSM)	green		BP	GO:0070848	response to growth factor	19/247	270/9280	0.00010415	0.00511542	0.00428152	DCN/HSP90AB1/TGFB1/DLL1/CCN1/WNT7A/MXRA5/CXCL8/SULF2/CRIM1/NGFR/NRP1/HSPA5/CHST11/PDGFB/FBN2/LRG1/FGF12/CD63	19	red
PB.18846.2227(KRT12~NIC)	green		BP	GO:0040007	growth	19/247	337/9280	0.00163062	0.0411369	0.0344308	TGFB1/DLL1/FAM107A/WNT7A/FN1/ARID5B/DUSP6/FRZB/PTN/IGFBP5/APP/WNT3/MMP14/CHST11/SOCS3/NPPC/SEMA3A/PTX3/IGFBP4	19	red
PB.29701.6(ELF3~NNC)	green		BP	GO:0022603	regulation of anatomical structure morphogenesis	18/247	320/9280	0.0022069	0.0476541	0.0398857	DCN/SPARC/TGFB1/DLL1/RGCC/WNT7A/FN1/CXCL8/PLK2/NGFR/NRP1/ANXA3/WNT3/S100A10/ADAMTS1/GLUL/RHOB/LRG1	18	red
PB.47911.29(ETNPPL~FSM)	green		CC	GO:0009986	cell surface	18/282	274/10372	0.000489819	0.013334	0.0125462	CLU/SPARC/ITGB1/PDGFC/ITGA2/WNT7A/SULF2/GPC4/NGFR/CDH13/PLAT/PLAU/APP/MFGE8/HSPA5/PDGFB/ENOX1/CD63	18	red
PB.21840.1447(RB1~ISM)	green		BP	GO:0090132	epithelium migration	16/247	120/9280	1.03e-07	2.18e-05	1.82e-05	S100A2/DCN/SPARC/FSTL1/RGCC/WNT7A/PLK2/CDH13/LOXL2/NRP1/ANXA3/PDGFB/GLUL/RHOB/EPHB4/LRG1	16	red
PB.57281.8(ZFAND6~NNC)	green		BP	GO:0043065	positive regulation of apoptotic process	16/247	186/9280	3.48e-05	0.00227519	0.00190429	CLU/TGM2/TIMP3/RGCC/CCN1/DUSP6/FRZB/TNFSF10/NGFR/UBD/GADD45B/RHOB/LTBR/PARK7/RPS6/NET1	16	red
PB.67213.64(SAT1~FSM)	green		BP	GO:0030162	regulation of proteolysis	16/247	223/9280	0.000295528	0.0115847	0.00969619	CLU/TIMP1/HSP90AB1/TIMP3/IL33/CCN1/NOP53/TRIB2/TMEM98/TNFSF10/NGFR/PLAT/PSMB9/S100A10/PARK7/CHAC1	16	red
PB.30268.1550(MCL1~FSM)	green		MF	GO:0004857	enzyme inhibitor activity	16/254	189/9563	4.16e-05	0.00208004	0.00182277	TIMP1/SERPINH1/TIMP3/TXNIP/SERPING1/SERPINE2/WFDC2/RGS2/CRIM1/PPP1R1B/PTN/SERPINE1/ANXA3/PARVA/APP/HEXIM1	16	red
PB.45416.86(PPP1R14C~NNC)	green		BP	GO:0043542	endothelial cell migration	15/247	87/9280	7.44e-09	6.32e-06	5.29e-06	S100A2/DCN/SPARC/FSTL1/RGCC/WNT7A/PLK2/CDH13/LOXL2/NRP1/ANXA3/PDGFB/GLUL/RHOB/EPHB4	15	red
PB.13170.251(MPZL3~NIC)	green		BP	GO:0030198	extracellular matrix organization	15/247	118/9280	4.89e-07	5.67e-05	4.74e-05	VIT/TGFB1/RGCC/CCN1/POSTN/SULF2/FBLN2/LOXL2/ANGPTL7/APP/ADAMTS1/TGFBI/ADAMTS9/PTX3/FBLN1	15	red
PB.38890.626(HSPB1~NNC)	green		BP	GO:0043062	extracellular structure organization	15/247	118/9280	4.89e-07	5.67e-05	4.74e-05	VIT/TGFB1/RGCC/CCN1/POSTN/SULF2/FBLN2/LOXL2/ANGPTL7/APP/ADAMTS1/TGFBI/ADAMTS9/PTX3/FBLN1	15	red
PB.172.935(GCAT~FSM)	green		BP	GO:0045229	external encapsulating structure organization	15/247	118/9280	4.89e-07	5.67e-05	4.74e-05	VIT/TGFB1/RGCC/CCN1/POSTN/SULF2/FBLN2/LOXL2/ANGPTL7/APP/ADAMTS1/TGFBI/ADAMTS9/PTX3/FBLN1	15	red
PB.11578.1(TP53I3~NNC)	green		BP	GO:0031589	cell-substrate adhesion	15/247	138/9280	3.67e-06	0.000343824	0.000287774	ITGB1/VIT/CCN1/FAM107A/FN1/FBLN2/CDH13/ITGB6/NRP1/PIK3R1/PARVA/PLAU/S100A10/PDGFB/CD63	15	red
PB.34161.60(KAT2B~FSM)	green		BP	GO:0001503	ossification	15/247	174/9280	5.98e-05	0.00324274	0.00271412	TGFB1/CYP24A1/CCN1/CRIM1/PTN/IGFBP5/MMP2/ID3/WNT3/MMP14/ANKH/FBN2/NELL1/NAB1/PTGER4	15	red
PB.30448.2(RHOC~FSM)	green		MF	GO:0003779	actin binding	15/254	219/9563	0.000728683	0.0171455	0.0150248	CTNNAL1/TPM1/TAGLN/FXYD5/MSN/TPM2/FSCN1/CALD1/EPB41L2/COTL1/FLNA/PARVA/SPTBN1/DSTN/MYO1D	15	red
PB.50186.1(MSMO1~FSM)	green		BP	GO:0061448	connective tissue development	14/247	113/9280	1.63e-06	0.000165781	0.000138756	EFEMP1/TGFB1/CCN1/WNT7A/SLC39A13/SULF2/ARID5B/FRZB/LOXL2/SLC39A14/CHST11/PDGFB/BARX2/NPPC	14	red
PB.36252.17(CLDN1~NNC)	green		BP	GO:0009611	response to wounding	13/247	178/9280	0.000920171	0.0279119	0.0233617	ANXA5/TIMP1/DPYSL3/SERPING1/CCN1/WNT7A/FN1/SULF2/F3/PLAU/PDGFB/LRG1/NFE2L2	13	red
PB.4815.10(EMP1~FSM)	green		BP	GO:0050673	epithelial cell proliferation	13/247	185/9280	0.00131174	0.0348157	0.0291401	SPARC/TGFB1/RGCC/WNT7A/SULF2/PTN/IGFBP5/NGFR/CDH13/LOXL2/PDGFB/LRG1/IGFBP4	13	red
PB.21997.785(LMO7~NNC)	green		BP	GO:0034976	response to endoplasmic reticulum stress	12/247	117/9280	6.24e-05	0.00324274	0.00271412	CLU/HSP90B1/MAN1A1/CXCL8/TRIB3/PIK3R1/HSPA5/PARK7/ERLEC1/TMEM117/NFE2L2/CHAC1	12	red
PB.51528.60(TRIM36~NIC)	green		BP	GO:0090287	regulation of cellular response to growth factor stimulus	12/247	126/9280	0.000128229	0.00594051	0.0049721	DCN/HSP90AB1/DLL1/CCN1/SULF2/CRIM1/NGFR/HSPA5/CHST11/FBN2/LRG1/CD63	12	red
PB.46086.1012(C6orf132~NNC)	green		BP	GO:0006790	sulfur compound metabolic process	12/247	150/9280	0.000646859	0.0216868	0.0181515	DCN/GSTM5/GSTM3/GSTM2/GSTO1/GNMT/CHST11/CHPF/PARK7/NFE2L2/ISCA1/CHAC1	12	red
PB.30141.747(TSTD1~FSM)	green		BP	GO:0060284	regulation of cell development	12/247	161/9280	0.00120671	0.0327095	0.0273773	TGM2/TGFB1/DLL1/WNT7A/FN1/FRZB/PTN/TMEM98/NRP1/WNT3/S100A10/NPPC	12	red
PB.53994.45(CPEB4~FSM)	green		MF	GO:0005539	glycosaminoglycan binding	12/254	92/9563	5.23e-06	0.000577172	0.000505785	DCN/VIT/FSTL1/CD44/FN1/POSTN/CXCL8/PTN/NRP1/APP/ADAMTS1/PGLYRP1	12	red
PB.1903.467(ATP6V1E1~FSM)	green		BP	GO:0001666	response to hypoxia	11/247	76/9280	4.72e-06	0.000414892	0.000347258	AQP3/RGCC/NOP53/PLOD1/DDIT4/LOXL2/MMP2/PLAT/EPAS1/PLAU/NFE2L2	11	red
PB.13095.345(ENSMFAG00000042463~ISM)	green		BP	GO:0010810	regulation of cell-substrate adhesion	11/247	83/9280	1.13e-05	0.000846284	0.000708325	VIT/CCN1/FAM107A/FN1/FBLN2/CDH13/NRP1/PIK3R1/PLAU/S100A10/PDGFB	11	red
PB.45416.149(PPP1R14C~FSM)	green		BP	GO:0051216	cartilage development	11/247	90/9280	2.47e-05	0.00165618	0.0013862	EFEMP1/TGFB1/CCN1/WNT7A/SULF2/FRZB/LOXL2/SLC39A14/CHST11/BARX2/NPPC	11	red
PB.12131.111(CD82~NNC)	green		MF	GO:0030246	carbohydrate binding	11/254	156/9563	0.00292153	0.0389538	0.0341358	CD44/P3H2/PLOD1/EVA1C/P4HA2/P4HA1/LOXL2/COL4A6/COL4A5/LGALS4/PTX3	11	red
PB.26616.261(PTGS2~FSM)	green		BP	GO:0002274	myeloid leukocyte activation	10/247	88/9280	0.000108412	0.00511542	0.00428152	CLU/CXCL6/TGFB1/IL33/FN1/CXCL8/ANXA3/APP/UBD/LTBR	10	red
PB.23012.1586(DSG1~FSM)	green		BP	GO:0050767	regulation of neurogenesis	9/247	104/9280	0.00176387	0.0432148	0.03617	TGM2/TGFB1/DLL1/WNT7A/FN1/PTN/TMEM98/WNT3/S100A10	9	red
PB.29777.207(MFSD4A~FSM)	green		MF	GO:0050839	cell adhesion molecule binding	9/254	82/9563	0.000308133	0.0102711	0.00900073	FXYD5/CCN1/ITGA2/FN1/PTN/CDH13/ITGB6/MFGE8/TGFBI	9	red
PB.29053.2(PLEKHN1~NIC)	green		MF	GO:1901681	sulfur compound binding	9/254	98/9563	0.00114528	0.0241112	0.0211291	FSTL1/FN1/POSTN/CXCL8/GSTM3/PTN/NRP1/APP/ADAMTS1	9	red
PB.60496.1(BNIP3L~FSM)	green		BP	GO:0010001	glial cell differentiation	8/247	82/9280	0.00146581	0.0377261	0.0315761	CLU/TGFB1/DLL1/PTN/TMEM98/NTRK2/APP/NAB1	8	red
PB.61393.8(FAM83A~NNC)	green		BP	GO:0001649	osteoblast differentiation	8/247	85/9280	0.00184865	0.0442712	0.0370542	CYP24A1/CCN1/CRIM1/IGFBP5/ID3/WNT3/FBN2/NELL1	8	red
PB.44127.153(HSD17B8~FSM)	green		BP	GO:0045444	fat cell differentiation	8/247	88/9280	0.00230642	0.0493845	0.041334	ARID5B/TRIB2/RGS2/FRZB/DLK2/TRIB3/MAFB/LRG1	8	red
PB.57060.408(RAB11A~FSM)	green		CC	GO:0005788	endoplasmic reticulum lumen	8/282	49/10372	4.63e-05	0.00189004	0.00177838	CLU/HSP90B1/P4HA2/P4HA1/HSPA5/CALU/COL5A1/ERLEC1	8	red
PB.64077.964(VSIR~NNC)	green		BP	GO:0006749	glutathione metabolic process	7/247	37/9280	4.52e-05	0.00261806	0.00219127	GSTM5/GSTM3/GSTM2/GSTO1/PARK7/NFE2L2/CHAC1	7	red
PB.13215.545(TRIM29~FSM)	green		BP	GO:0051017	actin filament bundle assembly	7/247	54/9280	0.000529256	0.0182647	0.0152872	DPYSL3/RGCC/STMN1/NRP1/PIK3R1/S100A10/PTGER4	7	red
PB.59465.469(ENSMFAG00000031459~NIC)	green		BP	GO:0061572	actin filament bundle organization	7/247	54/9280	0.000529256	0.0182647	0.0152872	DPYSL3/RGCC/STMN1/NRP1/PIK3R1/S100A10/PTGER4	7	red
PB.44065.393(CDKN1A~FSM)	green		BP	GO:1900180	regulation of protein localization to nucleus	7/247	57/9280	0.000738402	0.0238158	0.0199334	TGFB1/TMEM98/NGFR/PIK3R1/GLIS2/GLUL/PARK7	7	red
PB.31017.202(TACSTD2~FSM)	green		BP	GO:0030278	regulation of ossification	7/247	60/9280	0.00100813	0.0298688	0.0249997	TGFB1/CCN1/PTN/ANKH/FBN2/NELL1/PTGER4	7	red
PB.56309.66(DEGS2~FSM)	green		CC	GO:0042470	melanosome	7/282	40/10372	8.8e-05	0.00269557	0.00253633	ITGB1/HSP90AB1/HSP90B1/SLC1A5/MMP14/CALU/CD63	7	red
PB.7614.108(PID1~FSM)	green		CC	GO:0048770	pigment granule	7/282	40/10372	8.8e-05	0.00269557	0.00253633	ITGB1/HSP90AB1/HSP90B1/SLC1A5/MMP14/CALU/CD63	7	red
PB.2704.1(PCK1~FSM)	green		MF	GO:0019838	growth factor binding	7/254	60/9563	0.000997428	0.0221651	0.0194236	IGFBP2/IGFBP5/NGFR/NRP1/NTRK2/PDGFB/IGFBP4	7	red
PB.44529.282(DSP~ISM)	green		BP	GO:0032963	collagen metabolic process	6/247	27/9280	6.19e-05	0.00324274	0.00271412	TGFB1/RGCC/P3H2/MMP13/MMP2/MMP14	6	red
PB.44146.5(HLA-DRA~FSM)	green		BP	GO:0051781	positive regulation of cell division	6/247	32/9280	0.0001695	0.00744631	0.00623243	TGFB1/PDGFC/PTN/CAT/PGF/PDGFB	6	red
PB.55504.870(PYGL~FSM)	green		BP	GO:0051492	regulation of stress fiber assembly	6/247	34/9280	0.000240597	0.0097308	0.00814451	RGCC/STMN1/NRP1/PIK3R1/S100A10/PTGER4	6	red
PB.50781.131(ENSMFAG00000003998~FSM)	green		BP	GO:0110020	regulation of actomyosin structure organization	6/247	40/9280	0.000600897	0.0204145	0.0170866	RGCC/STMN1/NRP1/PIK3R1/S100A10/PTGER4	6	red
PB.23868.33(DSC2~FSM)	green		BP	GO:0070167	regulation of biomineral tissue development	6/247	45/9280	0.00114125	0.0312679	0.0261707	TGFB1/CCN1/PTN/ANKH/FBN2/NELL1	6	red
PB.11427.5(XDH~FSM)	green		BP	GO:0110149	regulation of biomineralization	6/247	46/9280	0.00128369	0.03443	0.0288173	TGFB1/CCN1/PTN/ANKH/FBN2/NELL1	6	red
PB.43803.343(FAM83B~NNC)	green		BP	GO:0014065	phosphatidylinositol 3-kinase signaling	6/247	50/9280	0.00199335	0.0449474	0.0376201	DCN/NOP53/FN1/CAT/PIK3R1/PDGFB	6	red
PB.3575.9307(KRT3~NNC)	green		MF	GO:0005201	extracellular matrix structural constituent	6/254	24/9563	2.98e-05	0.0017023	0.00149175	DCN/COL1A1/COL4A6/COL4A5/COL5A1/FBN2	6	red
PB.42921.528(IL20RA~NNC)	green		MF	GO:0005178	integrin binding	6/254	41/9563	0.000681767	0.0171455	0.0150248	CCN1/FN1/PTN/ITGB6/MFGE8/TGFBI	6	red
PB.52026.12(CD74~FSM)	green		MF	GO:0043177	organic acid binding	6/254	52/9563	0.0024206	0.0359805	0.0315303	P3H2/PLOD1/P4HA2/P4HA1/GNMT/ID3	6	red
PB.30339.431(NOTCH2~ISM)	green		BP	GO:0048661	positive regulation of smooth muscle cell proliferation	5/247	25/9280	0.000440506	0.0158086	0.0132315	IGFBP5/CDH13/MMP2/PDGFB/ADAMTS1	5	red
PB.17669.4(ENSMFAG00000032662~FSM)	green		BP	GO:0070301	cellular response to hydrogen peroxide	5/247	29/9280	0.000902721	0.0277124	0.0231948	CAT/RHOB/PARK7/NFE2L2/NET1	5	red
PB.47571.14(KIT~NNC)	green		BP	GO:0042542	response to hydrogen peroxide	5/247	33/9280	0.00165444	0.0413285	0.0345912	CAT/RHOB/PARK7/NFE2L2/NET1	5	red
PB.9722.67(NAGK~ISM)	green		BP	GO:0050818	regulation of coagulation	5/247	35/9280	0.00216724	0.0471977	0.0395036	ANXA5/SERPING1/PLAU/PDGFB/NFE2L2	5	red
PB.18846.5377(KRT12~ISM)	green		CC	GO:0098636	protein complex involved in cell adhesion	5/282	26/10372	0.000589956	0.0144539	0.0136	ITGB1/ITGA6/ITGA2/ITGB6/PLAU	5	red
PB.43689.132(MYO6~NIC)	green		MF	GO:0004364	glutathione transferase activity	5/254	19/9563	0.000108892	0.00435567	0.00381694	GSTM5/GSTM3/GSTM2/GSTO1/MGST1	5	red
PB.10605.10(MAL~NNC)	green		MF	GO:0016209	antioxidant activity	5/254	39/9563	0.00349724	0.0451256	0.0395443	GSTO1/CAT/GPX7/GPX8/PARK7	5	red
PB.2312.729(COX4I2~NNC)	green		BP	GO:1990748	cellular detoxification	4/247	17/9280	0.000886888	0.0277124	0.0231948	GSTM3/CAT/PARK7/NFE2L2	4	red
PB.61091.4(ESRP1~NNC)	green		BP	GO:0038084	vascular endothelial growth factor signaling pathway	4/247	18/9280	0.00111665	0.0312661	0.0261692	DCN/DLL1/NRP1/CD63	4	red
PB.57060.290(RAB11A~NNC)	green		BP	GO:0060323	head morphogenesis	4/247	20/9280	0.00169557	0.0419448	0.035107	TGFB1/ARID5B/MMP2/WNT3	4	red
PB.18255.921(ENSMFAG00000044202~FSM)	green		BP	GO:0098754	detoxification	4/247	21/9280	0.00205122	0.0450561	0.0377111	GSTM3/CAT/PARK7/NFE2L2	4	red
PB.36069.34(CHMP2B~FSM)	green		CC	GO:0008305	integrin complex	4/282	18/10372	0.00121098	0.0269718	0.0253784	ITGB1/ITGA6/ITGA2/ITGB6	4	red
PB.13558.524(RASGRP2~NIC)	green		CC	GO:0001725	stress fiber	4/282	20/10372	0.00183702	0.0321478	0.0302487	PDLIM1/MYL9/FAM107A/MST1R	4	red
PB.11578.21(TP53I3~NNC)	green		CC	GO:0032432	actin filament bundle	4/282	20/10372	0.00183702	0.0321478	0.0302487	PDLIM1/MYL9/FAM107A/MST1R	4	red
PB.31308.328(TRIM62~NNC)	green		CC	GO:0097517	contractile actin filament bundle	4/282	20/10372	0.00183702	0.0321478	0.0302487	PDLIM1/MYL9/FAM107A/MST1R	4	red
PB.23624.12(MBD2~NNC)	green		MF	GO:0031418	L-ascorbic acid binding	4/254	16/9563	0.000687545	0.0171455	0.0150248	P3H2/PLOD1/P4HA2/P4HA1	4	red
PB.54744.431(UACA~ISM)	green		MF	GO:0050840	extracellular matrix binding	4/254	19/9563	0.0013752	0.0250036	0.021911	DCN/CCN1/FBLN2/TGFBI	4	red
PB.59313.539(ASPH~NIC)	green		MF	GO:0004601	peroxidase activity	4/254	21/9563	0.00203667	0.0325867	0.0285562	CAT/GPX7/GPX8/PARK7	4	red
PB.23012.1319(DSG1~ISM)	green		BP	GO:0030574	collagen catabolic process	3/247	10/9280	0.00194599	0.0442712	0.0370542	MMP13/MMP2/MMP14	3	red
PB.57863.567(ARF6~NNC)	green		BP	GO:0070141	response to UV-A	3/247	10/9280	0.00194599	0.0442712	0.0370542	MMP1/TIMP1/MMP2	3	red
PB.11921.909(OVOL1~ISM)	green		MF	GO:0017017	MAP kinase tyrosine/serine/threonine phosphatase activity	3/254	11/9563	0.00260858	0.0359805	0.0315303	DUSP2/DUSP1/DUSP6	3	red
PB.2483.93(YWHAB~NIC)	green		MF	GO:0033549	MAP kinase phosphatase activity	3/254	11/9563	0.00260858	0.0359805	0.0315303	DUSP2/DUSP1/DUSP6	3	red
PB.54168.868(TJP1~ISM)	green
PB.54744.337(UACA~ISM)	green
PB.10268.1951(ENSMFAG00000002856~NNC)	green
PB.43742.117(FAM135A~NIC)	green
PB.13590.635(AHNAK~NNC)	green
PB.49342.248(TMPRSS11D~NIC)	green
PB.59650.329(RIDA~NNC)	green
PB.40348.1(PTTG1IP~FSM)	green
PB.42937.864(PERP~FSM)	green
PB.40967.49(CLDN4~FSM)	green
PB.10112.182(GALM~FSM)	green
PB.36767.35(RAP2B~FSM)	green
PB.20799.101(ENSMFAG00000043471~FSM)	green
PB.26837.83(NUAK2~FSM)	green
PB.20816.102(EBPL~FSM)	green
PB.26616.316(PTGS2~NIC)	green
PB.30268.608(ENSA~NNC)	green
PB.30231.2090(S100A4~NNC)	green
PB.19344.79(ZNF750~NNC)	green
PB.17632.188(OSTF1~NNC)	green
PB.18846.2202(KRT12~FSM)	green
PB.7614.295(PID1~NNC)	green
PB.27335.831(ENSMFAG00000003238~NIC)	green
PB.63701.1(RAB18~FSM)	green
PB.11877.8(MYEOV~NNC)	green
PB.21997.442(LMO7~NNC)	green
PB.23012.1302(DSG1~NNC)	green
PB.12834.625(CTSC~FSM)	green
PB.62303.633(ADIRF~NIC)	green
PB.52123.11(CLINT1~NNC)	green
PB.64319.19(EXOC6~NIC)	green
PB.63629.5(PLXDC2~NNC)	green
PB.13526.1052(ENSMFAG00000045971~FSM)	green
PB.5327.15(DGKA~NNC)	green
PB.13663.2078(ARFGAP2~NNC)	green
PB.3575.10912(KRT3~NIC)	green
PB.31720.932(HES2~FSM)	green
PB.39416.242(SCIN~NNC)	green
PB.38150.143(CLDND1~NIC)	green
PB.4678.240(TIGAR~FSM)	green
PB.3578.648(RARG~NNC)	green
PB.23012.1936(DSG1~ISM)	green
PB.12834.705(CTSC~ISM)	green
PB.9444.146(UXS1~NNC)	green
PB.40628.1272(TIAM1~NNC)	green
PB.11818.298(RNH1~NNC)	green
PB.43880.136(ADGRF4~ISM)	green
PB.30268.724(ENSA~ISM)	green
PB.54324.9(PLA2G4F~FSM)	green
PB.9396.1386(CREG2~FSM)	green
PB.35059.47(HIGD1A~FSM)	green
PB.23868.10(DSC2~ISM)	green
PB.59313.524(ASPH~NIC)	green
PB.61000.59(ENSMFAG00000043424~NIC)	green
PB.61000.46(ENSMFAG00000043424~NNC)	green
PB.21218.230(STK24~FSM)	green
PB.3575.10909(KRT3~NNC)	green
PB.30867.2(SERBP1~NNC)	green
PB.61000.44(ENSMFAG00000043424~NNC)	green
PB.37171.677(OXSR1~NIC)	green
PB.28944.15(CA6~NNC)	green
PB.48593.136(ACSL1~FSM)	green
PB.23461.143(VPS4B~NIC)	green
PB.19873.6(TOM1L1~FSM)	green
PB.57863.473(ARF6~NNC)	green
PB.6510.135(RND3~NNC)	green
PB.59313.25(ASPH~FSM)	green
PB.38150.144(CLDND1~NIC)	green
PB.26444.64(SEC16B~NNC)	green
PB.31251.1(MYCL~NNC)	green
PB.67259.3(ENSMFAG00000037796~NNC)	green
PB.7614.273(PID1~NNC)	green
PB.2483.19(YWHAB~FSM)	green
PB.36554.1(NUDT16~FSM)	green
PB.28696.1142(GRHL3~NNC)	green
PB.30231.2467(S100A6~NNC)	green
PB.67213.43(SAT1~FSM)	green
PB.39274.110(TAX1BP1~NNC)	green
PB.31017.37(TACSTD2~FSM)	green
PB.62607.38(NRBF2~FSM)	green
PB.22933.717(MOCOS~NIC)	green
PB.48169.1446(MGARP~FSM)	green
PB.40156.94(EPHA1~FSM)	green
PB.18846.5334(KRT12~ISM)	green
PB.26031.11(KMO~FSM)	green
PB.24790.240(PPP1R13L~FSM)	green
PB.44159.4(STK19~FSM)	green
PB.19312.1185(SIRT7~FSM)	green
PB.44529.247(DSP~NNC)	green
PB.61119.8(ERICH5~NNC)	green
PB.47424.584(MTHFD2L~NNC)	green
PB.5320.2(ORMDL2~FSM)	green
PB.52885.75(ERBIN~NNC)	green
PB.26906.369(IRF6~NNC)	green
PB.50244.27(GALNT7~FSM)	green
PB.31926.273(EMP2~FSM)	green
PB.12042.303(CTNND1~NNC)	green
PB.35142.166(CCDC12~NNC)	green
PB.29053.182(PLEKHN1~FSM)	green
PB.57341.533(HOMER2~NNC)	green
PB.47255.75(CDS1~FSM)	green
PB.18864.181(JUP~NIC)	green
PB.63453.391(CALML3~FSM)	green
PB.30448.1(RHOC~NNC)	green
PB.49581.13(DAPP1~FSM)	green
PB.63629.27(PLXDC2~FSM)	green
PB.67652.1(PBDC1~FSM)	green
PB.5327.1006(ERBB3~FSM)	green
PB.19942.21(YPEL~NNC)	green
PB.33155.1(CHP2~FSM)	green
PB.56211.31(ASB2~ISM)	green
PB.30232.179(PGLYRP3~NNC)	green
PB.67213.59(SAT1~NIC)	green
PB.26906.272(C1orf74~FSM)	green
PB.58892.60(NUDT18~NNC)	green
PB.42921.134(IL20RA~FSM)	green
PB.39274.243(TAX1BP1~NNC)	green
PB.15611.305(RAD23B~NIC)	green
PB.60667.585(POLB~FSM)	green
PB.1004.456(FAM83C~FSM)	green
PB.58931.244(KCTD9~NNC)	green
PB.13818.293(ENSMFAG00000032872~FSM)	green
PB.18846.2223(KRT12~NNC)	green
PB.23648.1092(ACAA2~FSM)	green
PB.30320.785(ANKRD35~NNC)	green
PB.39524.80(AKAP9~ISM)	green
PB.61242.8(OXR1~NNC)	green
PB.37133.2(ENSMFAG00000002453~NNC)	green
PB.56344.30(CDC42BPB~NIC)	green
PB.45622.18(AKIRIN2~FSM)	green
PB.23012.1550(DSG1~NNC)	green
PB.49465.5(ENSMFAG00000031659~NNC)	green
PB.19997.532(DHRS11~FSM)	green
PB.12283.17(BBOX1~FSM)	green
PB.48169.1570(MGARP~ISM)	green
PB.10947.27(CYP26B1~FSM)	green
PB.50381.9(CDKN2AIP~NNC)	green
PB.18846.5325(KRT12~ISM)	green
PB.64852.2(ARRDC1~FSM)	green
PB.14864.1(C2CD2L~NNC)	green
PB.19879.19(HLF~FSM)	green
PB.38886.298(ENSMFAG00000045321~NNC)	green
PB.10605.5(MAL~NNC)	green
PB.33670.28(HSD17B2~FSM)	green
PB.45416.177(PPP1R14C~FSM)	green
PB.67578.1(GDPD2~NIC)	green
PB.67897.1(ATG4A~FSM)	green
PB.11863.15(NADSYN1~FSM)	green
PB.36252.35(CLDN1~ISM)	green
PB.25180.470(CRB3~ISM)	green
PB.17970.95(WNK2~NIC)	green
PB.65131.2(GLTP~NNC)	green
PB.23012.1594(DSG1~NNC)	green
PB.54744.92(UACA~ISM)	green
PB.2295.2(SRXN1~FSM)	green
PB.63609.7(ARL5B~FSM)	green
PB.46254.601(LY6G6C~NNC)	green
PB.11876.227(CCND1~FSM)	green
PB.11608.3(SDC1~NNC)	green
PB.28944.14(CA6~FSM)	green
PB.32815.108(MVD~FSM)	green
PB.50822.277(EMB~FSM)	green
PB.32265.140(DNAJA2~ISM)	green
PB.16246.755(ALDH1A1~FSM)	green
PB.50112.68(TMEM144~NNC)	green
PB.27572.143(MAGI3~ISM)	green
PB.51528.130(TRIM36~NIC)	green
PB.63867.8(RASSF4~FSM)	green
PB.30602.148(FRRS1~NNC)	green
PB.65851.50(PIR~NNC)	green
PB.17481.19(AK3~FSM)	green
PB.20358.4(SLC9A3R1~FSM)	green
PB.6123.16(BRI3BP~NNC)	green
PB.62298.102(ENSMFAG00000001776~FSM)	green
PB.64066.682(ANXA7~NNC)	green
PB.47424.72(EPGN~FSM)	green
PB.67218.5(PDK3~FSM)	green
PB.29777.165(MFSD4A~NNC)	green
PB.49581.7(DAPP1~FSM)	green
PB.16246.744(ALDH1A1~FSM)	green
PB.59313.523(ASPH~NIC)	green
PB.29701.13(ELF3~NNC)	green
PB.56640.137(ENSMFAG00000034636~FSM)	green
PB.38150.239(CLDND1~NIC)	green
PB.3575.12403(KRT3~ISM)	green
PB.27101.75(WDR26~FSM)	green
PB.19758.306(NPEPPS~ISM)	green
PB.327.161(MTMR3~NIC)	green
PB.32336.54(AKTIP~NNC)	green
PB.60408.7(SH2D4A~NNC)	green
PB.46086.1001(C6orf132~NNC)	green
PB.6510.244(RND3~NNC)	green
PB.29803.54(CD55~NIC)	green
PB.37444.529(PXK~NNC)	green
PB.43742.746(FAM135A~ISM)	green
PB.17198.58(FAM214B~FSM)	green
PB.34514.30(GPR87~NNC)	green
PB.43711.373(CD109~FSM)	green
PB.64077.966(VSIR~FSM)	green
PB.7614.276(PID1~NNC)	green
PB.54744.111(UACA~ISM)	green
PB.5778.3(SCYL2~FSM)	green
PB.38343.1(SLC37A1~NIC)	green
PB.13163.31(TMPRSS13~NIC)	green
PB.5590.16(TMCC1~NNC)	green
PB.3575.11982(KRT3~NNC)	green
PB.18846.2238(KRT12~NIC)	green
PB.40123.129(ENSMFAG00000030418~FSM)	green
PB.31370.7(TENT5B~FSM)	green
PB.65655.2(ENSMFAG00000032060~ISM)	green
PB.56640.152(ENSMFAG00000034636~NNC)	green
PB.2312.732(COX4I2~NNC)	green
PB.54285.941(RHOV~NNC)	green
PB.47110.12(ARAP2~ISM)	green
PB.20358.2016(LLGL2~FSM)	green
PB.23330.34(PARD6G~ISM)	green
PB.46164.176(STK38~NNC)	green
PB.62303.586(ADIRF~NIC)	green
PB.32336.53(AKTIP~NNC)	green
PB.63867.1(RASSF4~ISM)	green
PB.2997.120(CLEC2B~NNC)	green
PB.18846.2228(KRT12~NNC)	green
PB.23903.30(NPC1~FSM)	green
PB.36252.16(CLDN1~NNC)	green
PB.12042.289(CTNND1~NNC)	green
PB.63448.6(HSD17B5~NNC)	green
PB.58515.7(GSKIP~NNC)	green
PB.13484.1(DHCR7~FSM)	green
PB.10971.2(FAM136A~FSM)	green
PB.63159.26(SHTN1~FSM)	green
PB.23868.1059(DSC3~NNC)	green
PB.42484.10(AFDN~NIC)	green
PB.3575.3801(KRT5~ISM)	green
PB.18846.2213(KRT12~NNC)	green
PB.23648.1011(MYO5B~ISM)	green
PB.18846.2024(KRT12~FSM)	green
PB.29616.5(PLA2G4A~NNC)	green
PB.5437.1145(MDM2~FSM)	green
PB.6087.5(KMT5A~NIC)	green
PB.46254.602(LY6G6C~NNC)	green
PB.34167.613(RAB5A~ISM)	green
PB.14128.52(TMEM9B~NNC)	green
PB.23868.327(DSC2~ISM)	green
PB.65854.3(ENSMFAG00000045948~FSM)	green
PB.38886.300(ENSMFAG00000045321~NNC)	green
PB.31260.1(HEYL~FSM)	green
PB.6510.256(RND3~NNC)	green
PB.56642.270(CHP1~FSM)	green
PB.18846.5383(KRT12~ISM)	green
PB.33670.1(HSD17B2~NNC)	green
PB.44159.19(STK19~NIC)	green
PB.58515.4(GSKIP~FSM)	green
PB.28658.807(WDTC1~FSM)	green
PB.54744.528(UACA~ISM)	green
PB.30867.26(SERBP1~ISM)	green
PB.16351.181(TLE1~ISM)	green
PB.46164.181(STK38~FSM)	green
PB.47255.58(CDS1~ISM)	green
PB.43358.1069(CRYBG1~NIC)	green
PB.19134.25(FAM104A~FSM)	green
PB.33066.93(NTAN1~FSM)	green
PB.48986.15(KLF3~FSM)	green
PB.23012.1731(DSG1~NNC)	green
PB.33828.106(FAM43A~FSM)	green
PB.10491.6(SLC66A3~FSM)	green
PB.63629.1761(PLXDC2~NNC)	green
PB.18116.998(CLDN7~NNC)	green
PB.62303.596(ADIRF~NIC)	green
PB.14128.83(TMEM9B~FSM)	green
PB.40930.691(MOSPD3~NNC)	green
PB.3575.6753(KRT5~NIC)	green
PB.494.127(BCL2L13~NNC)	green
PB.56642.1421(TYRO3~FSM)	green
PB.19992.244(ENSMFAG00000042248~ISM)	green
PB.40907.6(ZDHHC4~FSM)	green
PB.23012.2003(DSG1~ISM)	green
PB.38886.317(ENSMFAG00000045321~NNC)	green
PB.4501.413(CLIP1~ISM)	green
PB.34477.41(ENSMFAG00000044185~NIC)	green
PB.30254.20(RORC~FSM)	green
PB.59650.49(ENSMFAG00000031945~NNC)	green
PB.3575.11434(KRT3~NNC)	green
PB.13478.2(SLC22A18~NNC)	green
PB.56793.15(TMOD3~FSM)	green
PB.2824.17(NINJ2~NNC)	green
PB.14907.3(SC5D~FSM)	green
PB.30232.1(PGLYRP4~NNC)	green
PB.39416.311(SCIN~FSM)	green
PB.12600.25(UCP2~FSM)	green
PB.47815.164(ADH1B~FSM)	green
PB.34125.7(UBE2E2~ISM)	green
PB.42578.104(ENSMFAG00000035657~FSM)	green
PB.30872.227(SLC35D1~NNC)	green
PB.47424.224(EPGN~FSM)	green
PB.13579.202(ATL3~NNC)	green
PB.39896.20(GPR37~FSM)	green
PB.64319.542(CYP26A1~FSM)	green
PB.26906.243(C1orf74~FSM)	green
PB.36767.49(RAP2B~FSM)	green
PB.66558.48(TSC22D3~FSM)	green
PB.61393.30(FAM83A~NNC)	green
PB.44491.3(ENSMFAG00000045047~NNC)	green
PB.39416.244(SCIN~FSM)	green
PB.36252.319(CLDN1~NNC)	green
PB.15095.9(DIPK1B~NNC)	green
PB.18846.2265(KRT12~NIC)	green
PB.67373.20(GLOD5~NNC)	green
PB.67350.5(CDK16~FSM)	green
PB.19344.171(ZNF750~NNC)	green
PB.67018.1301(XG~FSM)	green
PB.43566.217(SLC35A1~FSM)	green
PB.18846.5444(KRT12~ISM)	green
PB.63701.9(RAB18~FSM)	green
PB.54578.3130(RORA~NNC)	green
PB.17036.8(KLF4~NNC)	green
PB.44529.2099(DSP~ISM)	green
PB.44977.5(NT5DC1~FSM)	green
PB.39416.287(SCIN~FSM)	green
PB.37691.8(CHL1~ISM)	green
PB.58172.875(PSEN1~FSM)	green
PB.57281.16(ZFAND6~NNC)	green
PB.66321.16(PDZD11~NNC)	green
PB.18116.1008(CLDN7~NIC)	green
PB.59465.748(ENSMFAG00000031459~NIC)	green
PB.22549.53(SOCS6~FSM)	green
PB.30187.1926(RIT1~NNC)	green
PB.6678.288(COBLL1~ISM)	green
PB.61000.47(ENSMFAG00000043424~NNC)	green
PB.47424.165(EPGN~FSM)	green
PB.54055.320(HNRNPAB~FSM)	green
PB.5022.36(ETFBKMT~NNC)	green
PB.25087.1842(PWWP3A~NNC)	green
PB.2824.39(NINJ2~NNC)	green
PB.9226.4(MLPH~NIC)	green
PB.57004.450(LACTB~FSM)	green
PB.22933.718(MOCOS~FSM)	green
PB.54750.2(THAP10~FSM)	green
PB.61759.249(KLF6~FSM)	green
PB.47860.734(UBE2D3~NNC)	green
PB.53536.251(SLC12A2~NNC)	green
PB.54578.3100(RORA~NNC)	green
PB.54744.573(UACA~ISM)	green
PB.4699.8(PLEKHG6~NNC)	green
PB.27335.1734(ADAM15~NNC)	green
PB.34723.400(TNIK~NNC)	green
PB.25821.195(DPRX~NNC)	green
PB.26186.86(RHOU~FSM)	green
PB.10268.2214(SLC4A1AP~FSM)	green
PB.63888.137(ERCC6~NNC)	green
PB.18384.10(ENSMFAG00000045596~NNC)	green
PB.57341.561(HOMER2~NNC)	green
PB.56640.240(ENSMFAG00000034636~NNC)	green
PB.23012.1888(DSG1~NNC)	green
PB.22532.254(CNDP2~NNC)	green
PB.30231.2328(S100A4~NIC)	green
PB.54365.200(SPG11~ISM)	green
PB.58893.6(REEP4~ISM)	green
PB.58892.126(ENSMFAG00000040324-ENSMFAG00000001150~ISM)	green
PB.41553.2(ENSMFAG00000043193~NNC)	green
PB.52356.1(TRIM7~NNC)	green
PB.6510.356(RND3~FSM)	green
PB.30141.749(TSTD1~NNC)	green
PB.27797.791(DR1~FSM)	green
PB.23868.75(DSC2~NNC)	green
PB.8261.19(DAPL1~ISM)	green
PB.4815.15(EMP1~FSM)	green
PB.21997.453(LMO7~NNC)	green
PB.50822.263(EMB~FSM)	green
PB.5849.60(TCP11L2~FSM)	green
PB.38456.797(DOP1B~ISM)	green
PB.59650.408(RIDA~FSM)	green
PB.32507.1305(ESRP2~ISM)	green
PB.11921.915(OVOL1~FSM)	green
PB.43358.825(CRYBG1~ISM)	green
PB.52763.1(SNX18~FSM)	green
PB.27875.170(ZNF326~NNC)	green
PB.11500.18(RBKS~FSM)	green
PB.1682.1(TST~NIC)	green
PB.23012.1962(DSG1~ISM)	green
PB.62343.48(TMEM254~NNC)	green
PB.3575.3940(KRT5~NIC)	green
PB.59650.332(RIDA~NIC)	green
PB.24071.908(RAB31~NNC)	green
PB.43742.169(FAM135A~NIC)	green
PB.64319.511(CYP26A1~NNC)	green
PB.47815.228(ADH1B~NNC)	green
PB.64319.522(CYP26A1~NNC)	green
PB.2483.83(YWHAB~NNC)	green
PB.32507.1304(ESRP2~NIC)	green
PB.34270.9(CPNE4~FSM)	green
PB.47424.184(EPGN~FSM)	green
PB.18846.5450(KRT12~ISM)	green
PB.59313.522(ASPH~NIC)	green
PB.21997.719(LMO7~NNC)	green
PB.33333.1(MT3~NNC)	green
PB.40362.1(ENSMFAG00000040533~NNC)	green
PB.57377.1870(ENSMFAG00000015946~FSM)	green
PB.63609.2(ARL5B~ISM)	green
PB.51528.107(TRIM36~NIC)	green
PB.16382.5(SLC28A3~ISM)	green
PB.29803.317(CD55~ISM)	green
PB.30268.1124(ENSA~ISM)	green
PB.25692.283(CBLC~FSM)	green
PB.2824.7(NINJ2~NNC)	green
PB.42394.2(INSIG1~FSM)	green
PB.23868.21(DSC2~NNC)	green
PB.16708.689(ABO~NIC)	green
PB.55058.20(ENSMFAG00000045494~NIC)	green
PB.30231.2348(S100A4~NNC)	green
PB.14729.437(DDX10~NNC)	green
PB.43161.55(ENSMFAG00000040159~FSM)	green
PB.7786.1(RAB17~FSM)	green
PB.31883.76(UBALD1~FSM)	green
PB.64527.855(SHOC2~NNC)	green
PB.49448.105(PTPN13~NNC)	green
PB.13170.1070(MPZL2~ISM)	green
PB.49581.11(DAPP1~FSM)	green
PB.27797.42(FNBP1L~NIC)	green
PB.18846.5235(KRT12~ISM)	green
PB.34072.272(ENSMFAG00000035374~NNC)	green
PB.2371.20(EPB41L1~NNC)	green
PB.25773.220(MYH14~NNC)	green
PB.46086.2212(CCND3~FSM)	green
PB.22707.151(ENSMFAG00000036485~FSM)	green
PB.59247.20(ATP6V1H~NNC)	green
PB.37330.437(ATRIP~NNC)	green
PB.33066.95(NTAN1~NIC)	green
PB.39941.556(UBE2H~FSM)	green
PB.57422.649(ENSMFAG00000042962~FSM)	green
PB.41419.839(OSBPL3~ISM)	green
PB.20111.44(PSME3~FSM)	green
PB.11608.50(SDC1~FSM)	green
PB.50781.407(ENSMFAG00000003998~ISM)	green
PB.25632.9(ITPKC~NNC)	green
PB.36252.124(CLDN1~FSM)	green
PB.20413.88(BAIAP2~NNC)	green
PB.59465.601(ENSMFAG00000031459~NNC)	green
PB.63609.40(ARL5B~FSM)	green
PB.26616.435(PTGS2~ISM)	green
PB.12114.62(SLC35C1~NNC)	green
PB.40381.127(CSTB~NNC)	green
PB.8642.9(NABP1~FSM)	green
PB.17970.4(WNK2~NNC)	green
PB.63629.135(PLXDC2~ISM)	green
PB.28374.251(PPCS~NNC)	green
PB.52885.634(ERBIN~NNC)	green
PB.36252.2(CLDN1~NNC)	green
PB.17970.103(WNK2~NIC)	green
PB.64331.3(CYP2C18~FSM)	green
PB.13818.317(ENSMFAG00000032872~NNC)	green
PB.46293.6(RNF39~NNC)	green
PB.61000.16(ENSMFAG00000043424~NNC)	green
PB.35456.29(FRMD4B~NNC)	green
PB.36019.167(ST3GAL6~NIC)	green
PB.8513.25(ITPRID2~FSM)	green
PB.15263.1835(SPTAN1~NIC)	green
PB.57971.537(LGALS3~NIC)	green
PB.19657.982(TMEM199~FSM)	green
PB.53994.58(CPEB4~ISM)	green
PB.33670.4(HSD17B2~NNC)	green
PB.44529.3010(DSP~ISM)	green
PB.62337.83(TSPAN14~FSM)	green
PB.13556.12(CDC42BPG~NNC)	green
PB.14128.62(TMEM9B~FSM)	green
PB.59465.440(ENSMFAG00000031459~NIC)	green
PB.58000.4(AP5M1~NNC)	green
PB.63906.1(RBP3~FSM)	green
PB.62303.639(ADIRF~ISM)	green
PB.60408.6(SH2D4A~FSM)	green
PB.44909.41(CDC40~FSM)	green
PB.192.61(KCTD17~NIC)	green
PB.30268.670(ENSA~ISM)	green
PB.61119.18(ERICH5~NNC)	green
PB.61296.127(AARD~FSM)	green
PB.54744.325(UACA~NNC)	green
PB.57341.570(HOMER2~NNC)	green
PB.24297.717(ZNF823~FSM)	green
PB.23012.1978(DSG1~ISM)	green
PB.31017.36(TACSTD2~FSM)	green
PB.44909.16(CDC40~ISM)	green
PB.4699.6(PLEKHG6~NNC)	green
PB.20413.30(BAIAP2~NNC)	green
PB.157.119(GTPBP1~ISM)	green
PB.6510.102(RND3~NNC)	green
PB.21840.906(RB1~FSM)	green
PB.18116.1003(CLDN7~ISM)	green
PB.23012.2025(DSG1~ISM)	green
PB.14968.516(ST3GAL4~NNC)	green
PB.51528.98(TRIM36~NNC)	green
PB.13568.26(MACROD1~NNC)	green
PB.6587.8(CYTIP~FSM)	green
PB.17632.202(OSTF1~FSM)	green
PB.21889.33(WDFY2~NIC)	green
PB.10765.64(SOWAHC~FSM)	green
PB.63960.20(ANXA11~NNC)	green
PB.25682.3(ZNF226~NNC)	green
PB.53852.291(ARHGEF37~NNC)	green
PB.28244.254(BTF3L4~FSM)	green
PB.6510.271(RND3~NIC)	green
PB.29701.44(ELF3~NIC)	green
PB.49425.3(LNX1~NNC)	green
PB.49684.1(EGF~ISM)	green
PB.42937.851(PERP~FSM)	green
PB.7614.112(PID1~NNC)	green
PB.64319.519(CYP26A1~FSM)	green
PB.19189.635(ACOX1~ISM)	green
PB.34958.77(LRRFIP2~NIC)	green
PB.43337.1195(EZR~NNC)	green
PB.57206.71(UBE2Q2~FSM)	green
PB.11608.10(SDC1~NNC)	green
PB.50801.114(HMGCS1~FSM)	green
PB.18266.358(UBB~NNC)	green
PB.23012.1384(DSG1~ISM)	green
PB.63175.181(CACUL1~FSM)	green
PB.40903.9(RAC1~NNC)	green
PB.23879.133(ENSMFAG00000036987~FSM)	green
PB.64319.532(CYP26A1~NNC)	green
PB.12131.361(CD82~NNC)	green
PB.17167.21(HINT2~NNC)	green
PB.46155.99(MTCH1~NNC)	green
PB.46859.561(KIAA0232~ISM)	green
PB.34477.40(ENSMFAG00000044185~NNC)	green
PB.26616.319(PTGS2~FSM)	green
PB.29692.481(PKP1~NNC)	green
PB.30187.1907(RIT1~NNC)	green
PB.11881.138(ENSMFAG00000045821~ISM)	green
PB.16246.121(ALDH1A1~NNC)	green
PB.3575.10919(KRT3~NNC)	green
PB.7931.1251(CYP27C1~NNC)	green
PB.32265.122(DNAJA2~NIC)	green
PB.43711.809(CD109~ISM)	green
PB.62925.1207(CRTAC1~NNC)	green
PB.48986.19(KLF3~ISM)	green
PB.31855.966(BICDL2~ISM)	green
PB.46254.599(LY6G6C~NNC)	green
PB.56217.7(IFI27L2~NNC)	green
PB.43358.1074(CRYBG1~NIC)	green
PB.21009.91(MYCBP2~ISM)	green
PB.44977.1(NT5DC1~NNC)	green
PB.11863.148(NADSYN1~ISM)	green
PB.16112.3(PLPP6~FSM)	green
PB.23012.1790(DSG1~ISM)	green
PB.29962.46(LYPLAL1~NNC)	green
PB.37247.10(SNRK~NNC)	green
PB.3575.11027(KRT3~NNC)	green
PB.64319.495(CYP26A1~NNC)	green
PB.3575.12327(KRT3~NNC)	green
PB.39524.563(AKAP9~NNC)	green
PB.20816.77(EBPL~FSM)	green
PB.39274.111(TAX1BP1~FSM)	green
PB.21429.585(GRTP1~NNC)	green
PB.5436.5(DYRK2~NNC)	green
PB.11354.2(ATL2~ISM)	green
PB.58566.1548(WDR20~NNC)	green
PB.6125.4(AACS~FSM)	green
PB.25773.276(MYH14~ISM)	green
PB.3575.11972(KRT3~NNC)	green
PB.47424.90(EPGN~NNC)	green
PB.16959.2(PTBP3~NIC)	green
PB.11859.41(ENSMFAG00000037524~ISM)	green
PB.22844.15(KATNAL2~NNC)	green
PB.18810.211(CWC25~FSM)	green
PB.61000.339(ENSMFAG00000043424~ISM)	green
PB.30602.6(FRRS1~NNC)	green
PB.18867.60(ACLY~ISM)	green
PB.19886.2(PCTP~FSM)	green
PB.5756.210(SLC25A3~ISM)	green
PB.57341.416(HOMER2~NNC)	green
PB.11721.7(ITGB1BP1~NNC)	green
PB.18116.1284(YBX2~ISM)	green
PB.32297.3(ENSMFAG00000035566~NNC)	green
PB.40628.1248(TIAM1~NNC)	green
PB.51785.410(PPP2CA~FSM)	green
PB.23012.1562(DSG1~FSM)	green
PB.55504.872(PYGL~NIC)	green
PB.17617.72(ANXA1~NNC)	green
PB.10605.2(MAL~NNC)	green
PB.3575.12350(KRT3~ISM)	green
PB.39416.271(SCIN~FSM)	green
PB.33280.28(PHKB~FSM)	green
PB.30232.46(PGLYRP4~NNC)	green
PB.60936.2(GDAP1~NNC)	green
PB.3575.12400(KRT3~ISM)	green
PB.5436.8(DYRK2~NNC)	green
PB.19803.1(EPN3~NNC)	green
PB.2724.7(NPEPL1~FSM)	green
PB.22014.45(SCEL~NNC)	green
PB.53520.76(LMNB1~ISM)	green
PB.44989.566(SLC35F1~ISM)	green
PB.67018.1307(XG~FSM)	green
PB.2383.91(TLDC2~ISM)	green
PB.26783.756(RABIF~FSM)	green
PB.36252.111(CLDN1~NNC)	green
PB.16246.830(ALDH1A1~ISM)	green
PB.29803.61(CD55~ISM)	green
PB.23868.946(DSC3~NIC)	green
PB.34958.79(LRRFIP2~FSM)	green
PB.57971.131(MAPK1IP1L~ISM)	green
PB.44977.10(NT5DC1~FSM)	green
PB.2679.1(CSTF1~NNC)	green
PB.14908.82(SORL1~ISM)	green
PB.30232.14(PGLYRP4~NNC)	green
PB.31720.992(HES2~NIC)	green
PB.50186.3(MSMO1~NIC)	green
PB.36625.102(NCK1~NNC)	green
PB.11921.9251(TM7SF2~NNC)	green
PB.16825.8(STRBP~FSM)	green
PB.61000.24(ENSMFAG00000043424~NNC)	green
PB.19879.12(HLF~NNC)	green
PB.36767.41(RAP2B~FSM)	green
PB.59313.1013(ASPH~ISM)	green
PB.11578.23(TP53I3~NNC)	green
PB.63128.12(AFAP1L2~FSM)	green
PB.36767.61(RAP2B~FSM)	green
PB.18846.5277(KRT12~ISM)	green
PB.9218.3(COPS8~NIC)	green
PB.13526.613(CLCF1~NNC)	green
PB.53215.1008(CAST~NIC)	green
PB.60496.151(BNIP3L~NNC)	green
PB.10216.192(YPEL~NNC)	green
PB.58893.5(REEP4~NIC)	green
PB.65364.371(LYPD3~NNC)	green
PB.42937.836(PERP~FSM)	green
PB.59247.22(ATP6V1H~NNC)	green
PB.11876.181(CCND1~FSM)	green
PB.58104.799(RDH12~NNC)	green
PB.16708.694(ABO~FSM)	green
PB.18846.5441(KRT12~ISM)	green
PB.24281.56(FBXL12~ISM)	green
PB.28374.248(PPCS~NNC)	green
PB.13457.68(SYT8~NNC)	green
PB.44146.39(HLA-DRA~FSM)	green
PB.23868.977(DSC3~FSM)	green
PB.53543.5(ISOC1~NNC)	green
PB.56309.67(DEGS2~NIC)	green
PB.23648.1146(ACAA2~ISM)	green
PB.31855.767(BICDL2~NNC)	green
PB.61393.24(FAM83A~NNC)	green
PB.30867.119(SERBP1~NNC)	green
PB.37691.43(CHL1~NNC)	green
PB.59313.765(ASPH~NIC)	green
PB.14968.368(ST3GAL4~NNC)	green
PB.3575.12093(KRT3~NNC)	green
PB.54744.393(UACA~ISM)	green
PB.64319.527(CYP26A1~NIC)	green
PB.64061.86(CAMK2G~NIC)	green
PB.16246.211(ALDH1A1~NNC)	green
PB.33670.2(HSD17B2~NNC)	green
PB.60149.405(LYNX1-SLURP2~NNC)	green
PB.59250.447(ENSMFAG00000043452~FSM)	green
PB.25751.914(PPP1R15A~NIC)	green
PB.26542.26(RNASEL~NNC)	green
PB.59313.1074(ASPH~NNC)	green
PB.54208.1373(SLC12A6~NNC)	green
PB.9293.1368(BOK~FSM)	green
PB.16708.684(ABO~NIC)	green
PB.47424.185(EPGN~FSM)	green
PB.3575.3619(KRT5~NNC)	green
PB.13459.255(TNNT3~NIC)	green
PB.9820.58(AFTPH~FSM)	green
PB.19389.866(PAFAH1B1~NNC)	green
PB.21840.1123(RB1~NIC)	green
PB.26184.121(ENSMFAG00000038822~NNC)	green
PB.53215.889(CAST~FSM)	green
PB.7614.110(PID1~NNC)	green
PB.56640.833(VPS18~FSM)	green
PB.2295.168(ENSMFAG00000039007~NIC)	green
PB.30141.645(ARHGAP30~ISM)	green
PB.30141.753(TSTD1~NNC)	green
PB.10020.94(ENSMFAG00000000709~NNC)	green
PB.63867.7(RASSF4~ISM)	green
PB.18407.82(IFT20~NNC)	green
PB.64319.80(EXOC6~ISM)	green
PB.67218.6(PDK3~FSM)	green
PB.32507.1242(ESRP2~NNC)	green
PB.4339.35(KCTD10~FSM)	green
PB.9727.7(ATP6V1B1~FSM)	green
PB.7614.250(PID1~NNC)	green
PB.19170.771(MIF4GD~FSM)	green
PB.37691.57(CHL1~NIC)	green
PB.59313.1041(ASPH~ISM)	green
PB.29556.6(MR1~FSM)	green
PB.48986.22(KLF3~ISM)	green
PB.44065.949(SRSF3~NNC)	green
PB.62889.17(BLNK~FSM)	green
PB.18846.5453(KRT12~ISM)	green
PB.36252.262(CLDN1~ISM)	green
PB.43337.585(EZR~ISM)	green
PB.54462.615(ARPP19~FSM)	green
PB.38150.142(CLDND1~NIC)	green
PB.23012.2043(DSG1~NIC)	green
PB.41600.60(DLX5~FSM)	green
PB.67218.2(PDK3~NNC)	green
PB.41510.35(AGR2~FSM)	green
PB.64319.538(CYP26A1~NNC)	green
PB.48169.1473(MGARP~NNC)	green
PB.20756.326(ENSMFAG00000031958~NNC)	green
PB.54285.815(RHOV~NNC)	green
PB.49872.9(MGST2~NNC)	green
PB.43803.421(FAM83B~NNC)	green
PB.44709.4(DUSP22~FSM)	green
PB.49431.24(USP46~FSM)	green
PB.30734.2(DDAH1~FSM)	green
PB.5929.157(CUX2~ISM)	green
PB.11968.269(NAA40~FSM)	green
PB.15059.1(GLB1L3~FSM)	green
PB.58109.448(RAD51B~NNC)	green
PB.57800.3(ENSMFAG00000043624~NIC)	green
PB.45426.65(PLEKHG1~NNC)	green
PB.29503.10(RASAL2~NNC)	green
PB.11921.8853(CAPN1~NNC)	green
PB.407.10(ENSMFAG00000031971~NNC)	green
PB.7959.450(CLASP1~NNC)	green
PB.31855.765(BICDL2~NNC)	green
PB.9396.1377(CREG2~FSM)	green
PB.20839.460(VPS36~NNC)	green
PB.60143.179(SLC45A4~NIC)	green
PB.19344.181(ZNF750~NNC)	green
PB.33155.2(CHP2~FSM)	green
PB.43742.182(FAM135A~NNC)	green
PB.43358.1423(CRYBG1~NNC)	green
PB.56344.175(CDC42BPB~NNC)	green
PB.52905.200(MARVELD2~NNC)	green
PB.24321.11(NOTCH3~NNC)	green
PB.57421.187(ENSMFAG00000035746~FSM)	green
PB.21997.831(LMO7~NIC)	green
PB.28873.70(KAZN~NNC)	green
PB.33126.13(LYRM1~NNC)	green
PB.30867.41(SERBP1~NNC)	green
PB.18407.83(IFT20~FSM)	green
PB.11500.15(RBKS~FSM)	green
PB.30268.1518(MCL1~NIC)	green
PB.5327.1263(PA2G4~NNC)	green
PB.27649.226(GNAI3~NNC)	green
PB.44529.2721(DSP~ISM)	green
PB.9226.327(MLPH~ISM)	green
PB.47815.189(ADH1B~ISM)	green
PB.61727.45(IDI1~NNC)	green
PB.27335.1733(ADAM15~NIC)	green
PB.54744.103(UACA~ISM)	green
PB.48986.43(KLF3~NNC)	green
PB.10912.369(ENSMFAG00000042302~NNC)	green
PB.25827.3(TTYH1~NNC)	green
PB.49682.103(GAR1~NNC)	green
PB.31720.933(HES2~NIC)	green
PB.17970.86(WNK2~NNC)	green
PB.11500.9(RBKS~NNC)	green
PB.30384.4(CD58~ISM)	green
PB.21550.4(MTUS2~FSM)	green
PB.1319.108(ZFP64~NNC)	green
PB.47424.190(EPGN~NIC)	green
PB.40158.158(ENSMFAG00000038110~NNC)	green
PB.5818.610(TDG~FSM)	green
PB.5327.2213(ENSMFAG00000033843~NIC)	green
PB.63609.13(ARL5B~FSM)	green
PB.18864.270(JUP~NIC)	green
PB.46427.6(MBOAT1~FSM)	green
PB.11859.26(ENSMFAG00000037524~NIC)	green
PB.44441.129(JARID2~ISM)	green
PB.65851.52(PIR~NNC)	green
PB.14968.371(ST3GAL4~NNC)	green
PB.29777.190(MFSD4A~FSM)	green
PB.182.281(GGA1~NIC)	green
PB.48986.77(KLF3~FSM)	green
PB.30493.3(LRIF1~NIC)	green
PB.49465.53(ENSMFAG00000031659~NNC)	green
PB.43803.411(FAM83B~FSM)	green
PB.10754.234(GCC2~NNC)	green
PB.4797.291(CREBL2~FSM)	green
PB.60164.238(NAPRT~NNC)	green
PB.52006.874(CSNK1A1~FSM)	green
PB.14968.384(ST3GAL4~NNC)	green
PB.8164.54(LYPD6B~NNC)	green
PB.13359.34(ARHGAP32~NNC)	green
PB.20363.5(GALR2~NNC)	green
PB.7387.1366(IKZF2~NNC)	green
PB.58893.8(REEP4~ISM)	green
PB.46427.7(MBOAT1~NNC)	green
PB.17316.1(CDKN2B~FSM)	green
PB.6510.253(RND3~NNC)	green
PB.2483.7(YWHAB~NIC)	green
PB.10268.743(BABAM2~NNC)	green
PB.68052.4(RBMX2~FSM)	green
PB.48986.72(KLF3~FSM)	green
PB.6303.25(DBI~NIC)	green
PB.38831.3(ENSMFAG00000035728~NNC)	green
PB.61000.687(ENSMFAG00000043424~NNC)	green
PB.42616.374(DDO~FSM)	green
PB.30867.285(SERBP1~NNC)	green
PB.31369.1722(SLC9A1~FSM)	green
PB.8104.1(ENSMFAG00000035962~FSM)	green
PB.58503.3(GLRX5~NNC)	green
PB.9293.724(FARP2~NNC)	green
PB.13590.637(AHNAK~NNC)	green
PB.18846.5370(KRT12~ISM)	green
PB.57971.554(LGALS3~NNC)	green
PB.2371.399(EPB41L1~ISM)	green
PB.9641.84(HK2~ISM)	green
PB.25386.563(CDCA8~FSM)	green
PB.47815.481(ADH1B~FSM)	green
PB.43742.391(FAM135A~NNC)	green
PB.13170.1069(MPZL2~NNC)	green
PB.18937.65(PLEKHM1~FSM)	green
PB.50244.42(GALNT7~NIC)	green
PB.60149.227(LYPD2~NNC)	green
PB.10605.22(MAL~NIC)	green
PB.25821.193(DPRX~NNC)	green
PB.54055.319(HNRNPAB~FSM)	green
PB.30533.169(SORT1~FSM)	green
PB.53516.13(GRAMD2B~FSM)	green
PB.30187.1927(RIT1~NNC)	green
PB.44529.1554(DSP~NNC)	green
PB.54650.501(DENND4A~NIC)	green
PB.12008.7(CD6~FSM)	green
PB.7849.106(MAB21L4~ISM)	green
PB.34648.55(PDCD10~FSM)	green
PB.29803.40(CD55~FSM)	green
PB.25682.6(ZNF226~NNC)	green
PB.44925.3(ENSMFAG00000001340~NIC)	green
PB.39183.11(STARD3NL~NNC)	green
PB.67213.72(SAT1~ISM)	green
PB.35163.3397(DALRD3~ISM)	green
PB.23012.1763(DSG1~NNC)	green
PB.58931.220(KCTD9~ISM)	green
PB.5272.404(ESPL1~ISM)	green
PB.9474.450(MALL~FSM)	green
PB.53133.1(POLR3G~NNC)	green
PB.67377.12(PQBP1~NNC)	green
PB.6087.2(KMT5A~FSM)	green
PB.42927.69(IFNGR1~NNC)	green
PB.40362.8(ENSMFAG00000040533~NNC)	green
PB.54744.681(UACA~ISM)	green
PB.16968.1(PTGR1~NNC)	green
PB.55244.26(AP1G2~NNC)	green
PB.59244.39(RB1CC1~NIC)	green
PB.10300.491(RAB10~FSM)	green
PB.51776.229(AFF4~NNC)	green
PB.57971.1260(LGALS3~ISM)	green
PB.13457.189(SYT8~ISM)	green
PB.43337.2658(EZR~NNC)	green
PB.54986.69(ENSMFAG00000039932~NIC)	green
PB.60784.10(RAB2A~FSM)	green
PB.19448.91(KIF1C~NNC)	green
PB.65755.10(CNFN~ISM)	green
PB.63113.1(DCLRE1A~FSM)	green
PB.30533.1130(WDR47~NNC)	green
PB.43358.321(CRYBG1~NNC)	green
PB.2495.2(SYS1~NIC)	green
PB.47921.592(PLA2G12A~FSM)	green
PB.23868.360(DSC2~ISM)	green
PB.21678.11(NHLRC3~FSM)	green
PB.29701.314(ELF3~FSM)	green
PB.18846.4875(KRT12~NNC)	green
PB.23868.920(DSC3~ISM)	green
PB.38456.240(MORC3~FSM)	green
PB.10444.169(LRATD1~FSM)	green
PB.4678.192(TIGAR~NNC)	green
PB.6686.463(GALNT3~FSM)	green
PB.56640.403(ENSMFAG00000034636~NNC)	green
PB.27896.129(SH3GLB1~NNC)	green
PB.57281.96(ZFAND6~NNC)	green
PB.16246.210(ALDH1A1~NNC)	green
PB.38777.465(DAGLB~NIC)	green
PB.54118.307(NIPA2~NIC)	green
PB.61686.1(C8orf33~NNC)	green
PB.19879.34(HLF~FSM)	green
PB.28560.20(GJB4~FSM)	green
PB.62982.4(ARMH3~ISM)	green
PB.36252.4(CLDN1~NNC)	green
PB.18116.902(CLDN7~ISM)	green
PB.23868.321(DSC2~NNC)	green
PB.61000.45(ENSMFAG00000043424~NNC)	green
PB.18116.919(CLDN7~ISM)	green
PB.22014.22(SCEL~NNC)	green
PB.57971.541(LGALS3~NNC)	green
PB.65364.121(ETHE1~NIC)	green
PB.29042.25(CALML6~NNC)	green
PB.29803.91(CD55~ISM)	green
PB.23868.1594(DSC3~ISM)	green
PB.25773.1442(MYH14~ISM)	green
PB.31251.14(MYCL~ISM)	green
PB.10020.59(ENSMFAG00000000709~NIC)	green
PB.17617.63(ANXA1~NNC)	green
PB.57971.665(LGALS3~NIC)	green
PB.64066.690(ANXA7~NNC)	green
PB.51678.561(C5orf63~ISM)	green
PB.56793.26(TMOD3~NNC)	green
PB.39698.198(PNPLA8~NNC)	green
PB.8985.3(DNAJB2~NNC)	green
PB.13526.614(CLCF1~FSM)	green
PB.26635.343(UCHL5~ISM)	green
PB.56146.200(FOXN3~NNC)	green
PB.7959.672(CLASP1~ISM)	green
PB.4815.170(EMP1~NIC)	green
PB.20095.27(EIF1~NIC)	green
PB.63603.13(CACNB2~NIC)	green
PB.48169.1475(MGARP~NIC)	green
PB.29777.180(MFSD4A~FSM)	green
PB.18846.5025(KRT12~NNC)	green
PB.60983.6(ZBTB10~NNC)	green
PB.26906.625(IRF6~NNC)	green
PB.41986.53(CFTR~ISM)	green
PB.38828.540(ENSMFAG00000036062~NNC)	green
PB.57863.563(ARF6~NNC)	green
PB.6088.5(ATP6V0A2~ISM)	green
PB.60472.1(SLC25A37~FSM)	green
PB.56642.258(CHP1~ISM)	green
PB.24310.387(GIPC1~NNC)	green
PB.14280.6(PLEKHB1~NNC)	green
PB.25219.1(CERS4~NNC)	green
PB.27401.615(TUFT1~FSM)	green
PB.6510.239(RND3~NIC)	green
PB.20813.204(RCBTB1~NNC)	green
PB.5272.1009(PRR13~ISM)	green
PB.43358.1493(CRYBG1~NNC)	green
PB.23330.608(TXNL4A~NIC)	green
PB.5327.1647(ENSMFAG00000032415~NIC)	green
PB.50184.1(KLHL2~FSM)	green
PB.33714.140(GSE1~NNC)	green
PB.17929.4(SYK~NNC)	green
PB.40324.5(LSS~NIC)	green
PB.29803.336(CD55~ISM)	green
PB.18946.127(ENSMFAG00000003171~NIC)	green
PB.13526.608(CLCF1~NIC)	green
PB.5437.1223(MDM2~NNC)	green
PB.27656.229(TMEM167B~FSM)	green
PB.41640.342(CYP51A1~FSM)	green
PB.31146.1146(TESK2~FSM)	green
PB.2032.338(KIF16B~ISM)	green
PB.5437.1521(MDM2~NIC)	green
PB.62323.386(GHITM~ISM)	green
PB.36252.23(CLDN1~NNC)	green
PB.20827.388(ENSMFAG00000002101~ISM)	green
PB.11792.175(PXDN~NNC)	green
PB.23012.1868(DSG1~ISM)	green
PB.5477.7(ATXN7L3B~FSM)	green
PB.17617.50(ANXA1~NNC)	green
PB.38343.26(SLC37A1~FSM)	green
PB.45959.3(MMUT~NNC)	green
PB.63629.10(PLXDC2~NNC)	green
PB.62298.2825(ENSMFAG00000001776~ISM)	green
PB.8108.3(ENSMFAG00000040453~FSM)	green
PB.10411.192(VSNL1~NNC)	green
PB.49581.44(DAPP1~NNC)	green
PB.29701.22(ELF3~NNC)	green
PB.3524.1070(LMBR1L~NIC)	green
PB.30268.682(ENSA~ISM)	green
PB.18846.5184(KRT12~FSM)	green
PB.47815.522(ADH1B~NNC)	green
PB.19879.15(HLF~FSM)	green
PB.21840.1453(RB1~NNC)	green
PB.57206.67(UBE2Q2~NIC)	green
PB.41154.9(SEC61G~NNC)	green
PB.52885.427(ERBIN~ISM)	green
PB.9231.419(LRRFIP1~ISM)	green
PB.5237.35(DAZAP2~NIC)	green
PB.4473.124(SRSF9~ISM)	green
PB.67129.423(ZRSR2~FSM)	green
PB.52944.10(HMGCR~NNC)	green
PB.13558.520(RASGRP2~FSM)	green
PB.29701.118(ELF3~NIC)	green
PB.39274.660(TAX1BP1~ISM)	green
PB.60426.339(NPM2~NNC)	green
PB.15263.1087(LRRC8A~NNC)	green
PB.53597.13(UQCRQ~NNC)	green
PB.17669.16(ENSMFAG00000032662~NNC)	green
PB.30414.1(SIKE1~NNC)	green
PB.11911.1968(RHOD~NIC)	green
PB.50822.259(EMB~NNC)	green
PB.56217.12(IFI27L2~NIC)	green
PB.52006.1765(CSNK1A1~ISM)	green
PB.62925.58(CRTAC1~NNC)	green
PB.30268.620(ENSA~FSM)	green
PB.19305.729(ACTG1~NNC)	green
PB.21968.635(KLF5~FSM)	green
PB.65680.21(IGF2~NIC)	green
PB.21968.634(KLF5~FSM)	green
PB.25602.354(ZFP36~FSM)	green
PB.65680.19(IGF2~FSM)	green
PB.12971.50(TMEM123~NNC)	green
PB.65680.18(IGF2~NNC)	green
PB.53635.27(TGFBI~FSM)	green
PB.60270.200(SOX7~FSM)	green
PB.29701.14(ELF3~NIC)	green
PB.57206.271(UBE2Q2~NIC)	green
PB.65680.24(IGF2~NNC)	green
PB.30867.39(SERBP1~NNC)	green
PB.33504.520(ENSMFAG00000001733~FSM)	green
PB.24145.716(GAMT~FSM)	green
PB.14128.73(TMEM9B~FSM)	green
PB.29153.7(ADSS2~FSM)	green
PB.36019.212(ST3GAL6~NNC)	green
PB.14735.4(FDX1~FSM)	green
PB.494.125(BCL2L13~NNC)	green
PB.47815.224(ADH1B~FSM)	green
PB.31922.212(CARHSP1~NNC)	green
PB.1187.15(SDC4~FSM)	green
PB.457.560(COMT~NNC)	green
PB.41706.6(SRI~FSM)	green
PB.57206.45(UBE2Q2~FSM)	green
PB.24452.69(ENSMFAG00000036111~FSM)	green
PB.28932.778(PGD~FSM)	green
PB.22278.5(MBNL2~NNC)	green
PB.59860.5(RAD21~FSM)	green
PB.1722.2(RTCB~FSM)	green
PB.66985.496(G6PD~FSM)	green
PB.14073.4(DKK3~NNC)	green
PB.24452.26(ENSMFAG00000036111~FSM)	green
PB.36712.2(GYG1~FSM)	green
PB.55261.1253(DHRS1~FSM)	green
PB.33964.63(PDCD6IP~NNC)	green
PB.44529.1930(DSP~ISM)	green
PB.62323.104(GHITM~FSM)	green
PB.51785.203(SKP1~NNC)	green
PB.176.27(ENSMFAG00000028669~NNC)	green
PB.30231.2402(S100A6~ISM)	green
PB.23592.18(NARS1~NNC)	green
PB.67213.56(SAT1~FSM)	green
PB.20690.1359(ELF1~NNC)	green
PB.15087.66(PAXX~ISM)	green
PB.63701.5(RAB18~FSM)	green
PB.67018.52(CD99~NNC)	green
PB.18867.5(ACLY~FSM)	green
PB.53692.1362(CTNNA1~FSM)	green
PB.36712.1(GYG1~FSM)	green
PB.5272.1010(PRR13~NNC)	green
PB.10797.1162(CHCHD5~FSM)	green
PB.36712.5(GYG1~NIC)	green
PB.25323.1(TECR~NNC)	green
PB.17481.13(AK3~NNC)	green
PB.610.99(DSTN~NIC)	green
PB.30533.910(WDR47~NNC)	green
PB.5818.606(TDG~NNC)	green
PB.31263.1324(RRAGC~NNC)	green
PB.16968.2(PTGR1~NNC)	green
PB.60496.17(BNIP3L~FSM)	green
PB.20839.106(THSD1~NIC)	green
PB.16655.1(FBXW5~NNC)	green
PB.9231.13(LRRFIP1~FSM)	green
PB.20065.106(ERBB2~ISM)	green
PB.60171.1(FAM83H~NIC)	green
PB.11578.6(TP53I3~NNC)	green
PB.56607.140(THBS1~ISM)	green
PB.62323.198(GHITM~NNC)	green
PB.31119.56(ENSMFAG00000038571~NNC)	green
PB.33133.2(TMEM159~NNC)	green
PB.31842.88(ECI1~FSM)	green
PB.63448.1(HSD17B5~FSM)	green
PB.58566.112(ENSMFAG00000002298~ISM)	green
PB.1768.4(AP1B1~FSM)	green
PB.28297.73(ENSMFAG00000035854~FSM)	green
PB.46697.20(GMDS~FSM)	green
PB.57060.450(RAB11A~NNC)	green
PB.30867.35(SERBP1~NNC)	green
PB.31094.62(NRDC~FSM)	green
PB.32092.4(CDR2~FSM)	green
PB.24296.755(RAB3D~NNC)	green
PB.33137.2(ENSMFAG00000003072~NNC)	green
PB.62685.401(CISD1~FSM)	green
PB.1292.18(UBE2V1~NIC)	green
PB.54208.523(EMC7~NNC)	green
PB.31289.43(TRAPPC3~FSM)	green
PB.4339.8(KCTD10~FSM)	green
PB.11950.180(PRDX5~NNC)	green
PB.25827.29(TTYH1~ISM)	green
PB.47815.223(ADH1B~NIC)	green
PB.64374.3(UBTD1~FSM)	green
PB.14084.4(GALNT18~FSM)	green
PB.4685.1(NDUFA9~NNC)	green
PB.10726.564(ECRG4~FSM)	green
PB.58581.596(ENSMFAG00000030493~NNC)	green
PB.2153.13(MKKS~NNC)	green
PB.37120.29(SENP2~FSM)	green
PB.407.16(ENSMFAG00000031971~NNC)	green
PB.26616.347(PTGS2~NIC)	green
PB.31095.795(EPS15~ISM)	green
PB.58206.2(DLST~FSM)	green
PB.39274.244(TAX1BP1~FSM)	green
PB.1595.2206(POLDIP3~FSM)	green
PB.45426.1376(MTHFD1L~FSM)	green
PB.41332.84(NT5C3A~NIC)	green
PB.22278.70(MBNL2~NNC)	green
PB.44110.22(ANKS1A~NNC)	green
PB.54558.115(SLTM~NIC)	green
PB.27875.99(ZNF326~FSM)	green
PB.60466.1(TNFRSF10A~NNC)	green
PB.25191.3(TRIP10~NNC)	green
PB.44529.1391(DSP~NNC)	green
PB.58704.120(FDFT1~FSM)	green
PB.28686.612(TMEM50A~NNC)	green
PB.48994.70(FAM114A1~NNC)	green
PB.5437.1364(MDM2~NIC)	green
PB.23661.201(C18orf32~FSM)	green
PB.28138.5(HOOK1~ISM)	green
PB.3575.5408(KRT5~NNC)	green
PB.28473.2707(MACF1~NNC)	green
PB.31922.851(ENSMFAG00000030929~FSM)	green
PB.62114.97(ARHGAP12~NIC)	green
PB.63561.1(PTER~NNC)	green
PB.46285.11(TRIM26~FSM)	green
PB.11592.3(LDAH~NIC)	green
PB.60102.3(ST3GAL1~NNC)	green
PB.28473.399(MACF1~ISM)	green
PB.55504.130(NIN~ISM)	green
PB.60466.171(TNFRSF10A~NNC)	green
PB.37372.1(MANF~NNC)	green
PB.1159.130(SERINC3~FSM)	green
PB.32270.97(ITFG1~FSM)	green
PB.30218.54(C1H1orf43~FSM)	green
PB.35141.62(ALS2CL~FSM)	green
PB.43658.79(SH3BGRL2~FSM)	green
PB.15792.194(UBAP1~NIC)	green
PB.28333.357(PLK3~FSM)	green
PB.21997.791(LMO7~NNC)	green
PB.18795.109(ACACA~ISM)	green
PB.66685.18(C1GALT1C1~NNC)	green
PB.19761.12(PNPO~FSM)	green
PB.67652.5(PBDC1~NIC)	green
PB.27335.1299(SLC50A1~FSM)	green
PB.65476.2(ECHS1~FSM)	green
PB.11397.1(FAM98A~FSM)	green
PB.8261.1(DAPL1~NNC)	green
PB.46892.36(NSG1~NIC)	green
PB.58022.7(DAAM1~ISM)	green
PB.11150.323(PSME4~ISM)	green
PB.37253.22(ABHD5~FSM)	green
PB.14827.3(ENSMFAG00000041171~NNC)	green
PB.15462.32(SLC31A2~NIC)	green
PB.28640.1405(ATP5IF1~NNC)	green
PB.44529.2126(DSP~ISM)	green
PB.35247.222(SELENOK~NNC)	green
PB.15718.8(TDRD7~FSM)	green
PB.26616.348(PTGS2~NNC)	green
PB.15713.114(NCBP1~FSM)	green
PB.58580.25(MARK3~NNC)	green
PB.67652.14(PBDC1~NNC)	green
PB.13587.1847(UBXN1~NNC)	green
PB.65202.5(ENSMFAG00000045040~NNC)	green
PB.58726.149(MSRA~NNC)	green
PB.18846.5363(KRT12~NIC)	green
PB.29041.481(PRKCZ~NNC)	green
PB.5160.21(SLC48A1~NIC)	green
PB.6510.270(RND3~ISM)	green
PB.11969.660(RTN3~NNC)	green
PB.50413.7(SLC25A4~NNC)	green
PB.7614.249(PID1~FSM)	green
PB.46907.198(WDR1~FSM)	green
PB.29686.449(CAMSAP2~NNC)	green
PB.11578.29(TP53I3~NNC)	green
PB.26744.1020(PHLDA3~FSM)	green
PB.30179.581(MRPL24~FSM)	green
PB.28640.1189(SESN2~FSM)	green
PB.18714.60(TRIM37~NNC)	green
PB.22472.121(CTDP1~NNC)	green
PB.17806.48(CTSL~ISM)	green
PB.52481.2(MARCHF6~NNC)	green
PB.16544.5(IPPK~NNC)	green
PB.40158.157(ENSMFAG00000038110~NNC)	green
PB.8980.1(ZFAND2B~NNC)	green
PB.31529.4(CAPZB~NNC)	green
PB.57206.72(UBE2Q2~ISM)	green
PB.53215.979(CAST~NNC)	green
PB.1212.270(ZNF335~ISM)	green
PB.14073.1(DKK3~NNC)	green
PB.610.184(DSTN~FSM)	green
PB.23661.338(DYM~FSM)	green
PB.63629.31(PLXDC2~NNC)	green
PB.44909.4(CDC40~NNC)	green
PB.27272.322(IFI16~NNC)	green
PB.54578.2515(ANXA2~NNC)	green
PB.18512.218(RFFL~NNC)	green
PB.58517.10(PAPOLA~ISM)	green
PB.1644.32(ENSMFAG00000003325~NNC)	green
PB.47815.559(ADH1B~ISM)	green
PB.62115.123(KIF5B~ISM)	green
PB.43959.7(UBR2~ISM)	green
PB.37390.2(ALAS1~NNC)	green
PB.43311.117(SERAC1~FSM)	green
PB.29962.3(LYPLAL1~FSM)	green
PB.64470.778(ENSMFAG00000044610~FSM)	green
PB.54650.517(DENND4A~ISM)	green
PB.17635.1159(PCSK5~NNC)	green
PB.62834.46(IDE~ISM)	green
PB.43211.23(ENSMFAG00000039727~FSM)	green
PB.26062.178(GPR137B~FSM)	green
PB.23694.5(ENSMFAG00000012951~NNC)	green
PB.3796.48(ZFC3H1~NIC)	green
PB.41332.83(NT5C3A~FSM)	green
PB.54673.52(AAGAB~NIC)	green
PB.58372.5(PSMC1~NNC)	green
PB.42206.19(STMP1~FSM)	green
PB.5437.1117(MDM2~FSM)	green
PB.14735.3(FDX1~FSM)	green
PB.2764.203(OSBPL2~FSM)	green
PB.31888.5(C16orf89~FSM)	green
PB.63189.70(TIAL1~NNC)	green
PB.36712.13(GYG1~FSM)	green
PB.31580.133(CASP9~NNC)	green
PB.37951.291(GOLGB1~NNC)	green
PB.55305.258(STRN3~FSM)	green
PB.46277.343(FLOT1~NNC)	green
PB.47883.11(TBCK~NNC)	green
PB.10268.1959(ENSMFAG00000002856~NIC)	green
PB.48926.7(ENSMFAG00000033269~NNC)	green
PB.64764.6(MGMT~NNC)	green
PB.58580.129(MARK3~ISM)	green
PB.22278.57(MBNL2~ISM)	green
PB.3479.97(SCAF11~ISM)	green
PB.51674.30(ENSMFAG00000045191~FSM)	green
PB.27101.43(WDR26~NNC)	green
PB.32063.54(GDE1~NNC)	green
PB.35236.1669(TKT~ISM)	green
PB.26818.72(PPP1R15B~FSM)	green
PB.44618.63(PSMG4~NNC)	green
PB.67213.126(SAT1~NIC)	green
PB.23300.7(SPIRE1~ISM)	green
PB.46671.602(SLC22A23~NNC)	green
PB.12383.43(C11orf58~NNC)	green
PB.55609.108(EXOC5~FSM)	green
PB.15611.167(RAD23B~NNC)	green
PB.49620.210(CISD2~NNC)	green
PB.55871.303(ZFP36L1~FSM)	green
PB.62858.1(RBP4~FSM)	green
PB.30206.12(PMVK~NNC)	green
PB.11911.643(GRK2~ISM)	green
PB.51816.9(SPOCK1~ISM)	green
PB.58517.1(PAPOLA~NNC)	green
PB.5960.5(SDSL~NNC)	green
PB.44529.1558(DSP~ISM)	green
PB.16246.774(ALDH1A1~ISM)	green
PB.39941.1946(UBE2H~ISM)	green
PB.14073.75(DKK3~ISM)	green
PB.60679.279(UBE2V2~FSM)	green
PB.60138.32(TRAPPC9~ISM)	green
PB.36618.80(PPP2R3A~ISM)	green
PB.13567.137(BAD~NNC)	green
PB.13145.27(CADM1~FSM)	green
PB.10940.19(PRADC1~NNC)	green
PB.2027.9(RRBP1~NIC)	green
PB.40597.343(SYNJ1~ISM)	green
PB.52137.120(SLU7~FSM)	green
PB.37117.1(MAP3K13~NNC)	green
PB.12296.380(HTATIP2~NNC)	green
PB.18846.2315(KRT12~NNC)	green
PB.63993.3(KCNMA1~NNC)	green
PB.46444.1910(KIF13A~NIC)	green
PB.52888.929(MAST4~ISM)	green
PB.6191.1(PXMP2~FSM)	green
PB.24872.231(IRF3~FSM)	green
PB.62076.148(ABI1~FSM)	green
PB.63475.13(ATP5F1C~NIC)	green
PB.51947.59(YIPF5~NIC)	green
PB.26077.496(GGPS1~NNC)	green
PB.12000.96(SDHAF2~FSM)	green
PB.44359.320(RNF144B~ISM)	green
PB.49141.10(HNRNPDL~NNC)	green
PB.39672.426(NAMPT~ISM)	green
PB.44067.94(KCTD20~NIC)	green
PB.19768.389(ENSMFAG00000037178~FSM)	green
PB.9811.242(ACTR2~NNC)	green
PB.49253.488(CDKL2~FSM)	green
PB.19942.760(CLTC~ISM)	green
PB.51800.314(MACROH2A1~FSM)	green
PB.7223.237(RAPH1~ISM)	green
PB.27401.1807(PSMD4~FSM)	green
PB.7861.788(HDLBP~NNC)	green
PB.4473.125(SRSF9~FSM)	green
PB.55504.868(PYGL~NNC)	green
PB.5223.2(GPD1~NNC)	green
PB.13526.1073(ENSMFAG00000045971~NNC)	green
PB.59428.349(STAU2~ISM)	green
PB.24336.549(SMIM7~NIC)	green
PB.52006.456(CSNK1A1~NIC)	green
PB.41607.1(PON2~NNC)	green
PB.56172.427(PPP4R3A~ISM)	green
PB.35163.4660(USP4~NNC)	green
PB.28686.616(TMEM50A~NNC)	green
PB.16676.221(NACC2~NNC)	green
PB.22278.58(MBNL2~NNC)	green
PB.31517.8(MUL1~ISM)	green
PB.25280.997(LDLR~NIC)	green
PB.1903.503(ATP6V1E1~FSM)	green
PB.41287.21(KIAA0895~NIC)	green
PB.37394.364(SMIM4~NNC)	green
PB.43742.217(FAM135A~NIC)	green
PB.12190.150(CAPRIN1~ISM)	green
PB.9084.2(MFF~FSM)	green
PB.10268.1950(ENSMFAG00000002856~NNC)	green
PB.39274.78(TAX1BP1~FSM)	green
PB.20394.1(PGS1~FSM)	green
PB.5290.33(ENSMFAG00000031561~NNC)	green
PB.44529.1600(DSP~ISM)	green
PB.32580.79(BCAR1~FSM)	green
PB.26635.68(UCHL5~ISM)	green
PB.25219.640(HNRNPM~NNC)	green
PB.28932.779(PGD~NNC)	green
PB.4366.1276(PPP1CC~FSM)	green
PB.23868.949(DSC3~ISM)	green
PB.57189.7(C15orf39~NNC)	green
PB.62114.461(ARHGAP12~ISM)	green
PB.32560.48(MARVELD3~FSM)	green
PB.8425.3(CYBRD1~FSM)	green
PB.19873.3(TOM1L1~ISM)	green
PB.13457.185(SYT8~NNC)	green
PB.11950.218(PRDX5~NIC)	green
PB.64077.206(PSAP~NIC)	green
PB.8490.1(OSBPL6~NNC)	green
PB.37253.1(ABHD5~NNC)	green
PB.55261.613(ENSMFAG00000003053~FSM)	green
PB.9811.287(ACTR2~FSM)	green
PB.48986.11(KLF3~ISM)	green
PB.54650.510(DENND4A~ISM)	green
PB.59313.1357(ASPH~ISM)	green
PB.39416.416(SCIN~ISM)	green
PB.43566.219(SLC35A1~NNC)	green
PB.8923.5(IGFBP2~NNC)	red
PB.18860.2694(KRT15~FSM)	red
PB.17218.1822(AQP3~FSM)	red
PB.30231.1875(S100A2~FSM)	red
PB.18860.4957(KRT19~FSM)	red
PB.58971.48(CLU~NIC)	red
PB.12977.63(MMP1~NNC)	red
PB.35163.1545(COL7A1~ISM)	red
PB.49371.5(IGFBP7~FSM)	red
PB.30231.1742(S100A2~FSM)	red
PB.51802.333(CXCL14~FSM)	red
PB.4040.256(DCN~FSM)	red
PB.27645.10(GSTM5~FSM)	red
PB.25692.1768(APOE~NNC)	red
PB.3850.481(CSRP2~FSM)	red
PB.51802.42(CXCL14~FSM)	red
PB.18860.2703(KRT15~NNC)	red
PB.11817.107(ENSMFAG00000040595~FSM)	red
PB.41181.1(IGFBP3~FSM)	red
PB.9143.18(ENSMFAG00000031087~FSM)	red
PB.52058.73(SPARC~NNC)	red
PB.39319.11(GPNMB~FSM)	red
PB.34376.4(RBP1~ISM)	red
PB.20739.31(TSC22D1~FSM)	red
PB.29566.375(LAMC2~ISM)	red
PB.30231.1755(S100A2~NNC)	red
PB.25601.1939(ENSMFAG00000039064~NNC)	red
PB.25747.220(EMP3~FSM)	red
PB.3575.13288(ENSMFAG00000040972~NNC)	red
PB.3145.9(LDHB~FSM)	red
PB.16997.281(CTNNAL1~FSM)	red
PB.48015.164(ANXA5~FSM)	red
PB.62137.101(ITGB1~NNC)	red
PB.1078.7(TGM2~FSM)	red
PB.67359.160(TIMP1~FSM)	red
PB.63585.3(VIM~NNC)	red
PB.23097.91(LAMA3~ISM)	red
PB.51977.26(DPYSL3~FSM)	red
PB.4040.442(DCN~FSM)	red
PB.14329.1(SERPINH1~NIC)	red
PB.57004.1(TPM1~NNC)	red
PB.41181.40(IGFBP3~NNC)	red
PB.10153.90(VIT~FSM)	red
PB.8923.6(IGFBP2~NIC)	red
PB.63585.1(VIM~NNC)	red
PB.43930.458(HSP90AB1~ISM)	red
PB.181.1(ENSMFAG00000036985~FSM)	red
PB.63585.22(VIM~FSM)	red
PB.5818.3(HSP90B1~ISM)	red
PB.11308.852(ZFP36L2~FSM)	red
PB.49383.475(HOPX~NNC)	red
PB.59275.2(PENK~FSM)	red
PB.62876.143(PDLIM1~FSM)	red
PB.4040.439(DCN~NNC)	red
PB.26594.359(IVNS1ABP~FSM)	red
PB.14820.536(TAGLN~FSM)	red
PB.1212.71(PLTP~FSM)	red
PB.4040.544(DCN~FSM)	red
PB.25532.474(FXYD5~NNC)	red
PB.55874.118(ENSMFAG00000003078~FSM)	red
PB.49371.4(IGFBP7~NNC)	red
PB.57004.6(TPM1~ISM)	red
PB.4040.219(DCN~NNC)	red
PB.14166.1(CAVIN3~FSM)	red
PB.55228.1256(SLC7A8~NNC)	red
PB.31193.2(SLC2A1~NNC)	red
PB.9143.85(ENSMFAG00000031087~FSM)	red
PB.67503.67(MSN~FSM)	red
PB.49383.480(HOPX~NNC)	red
PB.58620.58(ENSMFAG00000039395~NNC)	red
PB.18860.4805(KRT15~NIC)	red
PB.27645.210(GSTM5~FSM)	red
PB.41983.2(CAV1~ISM)	red
PB.66132.8(SLC38A5~FSM)	red
PB.49371.1(IGFBP7~NNC)	red
PB.54618.127(CA12~FSM)	red
PB.42889.12(SGK1~NNC)	red
PB.47429.6(CXCL6~FSM)	red
PB.43930.549(HSP90AB1~ISM)	red
PB.11117.1(EFEMP1~NNC)	red
PB.291.4(TIMP3~FSM)	red
PB.10539.30(ID2~NNC)	red
PB.26594.510(IVNS1ABP~FSM)	red
PB.30320.276(TXNIP~FSM)	red
PB.18840.1371(TNS4~NNC)	red
PB.52058.63(SPARC~NNC)	red
PB.4040.510(DCN~FSM)	red
PB.53973.4(ENSMFAG00000043579~NNC)	red
PB.51802.194(CXCL14~FSM)	red
PB.12043.48(SERPING1~ISM)	red
PB.17175.8(TPM2~FSM)	red
PB.9309.6(DUSP2~FSM)	red
PB.41984.27(MET~NNC)	red
PB.7555.23(SERPINE2~FSM)	red
PB.24712.204(TGFB1~FSM)	red
PB.54618.33(CA12~NIC)	red
PB.37960.1(FSTL1~FSM)	red
PB.28894.3(PDPN~NNC)	red
PB.41181.6(IGFBP3~FSM)	red
PB.9143.821(ENSMFAG00000031087~FSM)	red
PB.12174.355(CD44~NNC)	red
PB.23097.55(LAMA3~ISM)	red
PB.18073.133(VMO1~FSM)	red
PB.23097.936(LAMA3~ISM)	red
PB.65071.1(ENSMFAG00000037375~NNC)	red
PB.24350.7(BST2~FSM)	red
PB.54618.73(CA12~FSM)	red
PB.18860.2707(KRT15~NIC)	red
PB.4040.301(DCN~NNC)	red
PB.63585.17(VIM~NNC)	red
PB.4040.234(DCN~FSM)	red
PB.5254.21(KRT7~FSM)	red
PB.26594.424(IVNS1ABP~FSM)	red
PB.52245.113(DUSP1~FSM)	red
PB.44718.1(DLL1~NIC)	red
PB.45652.37(ENSMFAG00000046691~NNC)	red
PB.38834.16(AZGP1~FSM)	red
PB.8433.33(ITGA6~NNC)	red
PB.63585.8(VIM~FSM)	red
PB.16061.30(IL33~NNC)	red
PB.48342.10(PDGFC~NNC)	red
PB.13192.505(H2AX~FSM)	red
PB.42735.13(MAN1A1~NNC)	red
PB.2378.245(MYL9~FSM)	red
PB.9143.1(ENSMFAG00000031087~NNC)	red
PB.18860.6103(KRT14~NIC)	red
PB.291.131(TIMP3~FSM)	red
PB.1338.1(CYP24A1~FSM)	red
PB.16997.283(CTNNAL1~ISM)	red
PB.11348.115(SRSF7~FSM)	red
PB.10539.60(ID2~FSM)	red
PB.13551.165(GPHA2~NNC)	red
PB.66132.6(SLC38A5~NIC)	red
PB.62137.258(ITGB1~NNC)	red
PB.66538.3(BEX2~NNC)	red
PB.51802.421(CXCL14~FSM)	red
PB.21734.2(RGCC~FSM)	red
PB.49383.474(HOPX~NNC)	red
PB.36255.46(P3H2~FSM)	red
PB.30020.1(DEGS1~FSM)	red
PB.27927.10(CCN1~FSM)	red
PB.62981.2(NPM3~FSM)	red
PB.62137.422(ITGB1~NNC)	red
PB.35304.1(FAM107A~FSM)	red
PB.47429.43(CXCL6~FSM)	red
PB.52747.4(FST~FSM)	red
PB.10539.12(ID2~FSM)	red
PB.38762.260(FSCN1~FSM)	red
PB.66810.3(GPC3~ISM)	red
PB.18840.2301(TNS4~NIC)	red
PB.52746.505(ITGA2~NNC)	red
PB.25745.78(NOP53~FSM)	red
PB.16061.275(IL33~NNC)	red
PB.55874.188(ENSMFAG00000003078~FSM)	red
PB.52747.1(FST~NNC)	red
PB.30445.1(SLC16A1~NNC)	red
PB.24374.1(COMP~FSM)	red
PB.18860.11217(KRT14~NIC)	red
PB.3850.480(CSRP2~NNC)	red
PB.22437.1(TMEM255B~FSM)	red
PB.2495.381(WFDC2~FSM)	red
PB.40827.1(LFNG~FSM)	red
PB.17344.614(ENSMFAG00000041970~NNC)	red
PB.65052.26(ENSMFAG00000000580~FSM)	red
PB.35660.15(WNT7A~FSM)	red
PB.65767.74(MXRA5~ISM)	red
PB.1738.3(SELENOM~NIC)	red
PB.30231.276(S100A13~NNC)	red
PB.7424.44(FN1~NIC)	red
PB.25631.25(LTBP4~NNC)	red
PB.12096.24(SLC39A13~NNC)	red
PB.17344.612(ENSMFAG00000041970~NNC)	red
PB.20645.2(POSTN~FSM)	red
PB.42194.7(CALD1~NNC)	red
PB.12977.104(MMP1~FSM)	red
PB.54421.7(FBN1~ISM)	red
PB.51802.335(CXCL14~NIC)	red
PB.63011.2254(COL17A1~NNC)	red
PB.47431.14(CXCL8~FSM)	red
PB.12174.82(CD44~NIC)	red
PB.38273.58(COL18A1~ISM)	red
PB.60618.3(ZNF703~FSM)	red
PB.30517.2(GSTM3~FSM)	red
PB.4712.124(ENSMFAG00000044978~NNC)	red
PB.17344.522(ENSMFAG00000041970~NNC)	red
PB.2961.62(SLC2A14~NIC)	red
PB.66426.5(ITM2A~FSM)	red
PB.1247.267(SULF2~NNC)	red
PB.65673.83(LAMB3~NNC)	red
PB.41755.20(SEMA3C~FSM)	red
PB.4712.173(ENSMFAG00000044978~FSM)	red
PB.291.92(TIMP3~FSM)	red
PB.27645.331(GSTM2~FSM)	red
PB.52938.166(ENSMFAG00000038283~FSM)	red
PB.67503.48(MSN~ISM)	red
PB.291.267(TIMP3~FSM)	red
PB.47236.2(OCIAD2~FSM)	red
PB.24819.40(SLC1A5~ISM)	red
PB.18860.11(KRT32~NNC)	red
PB.47655.14(SPARCL1~NIC)	red
PB.7424.40(FN1~ISM)	red
PB.37823.1(FBLN2~FSM)	red
PB.52746.1483(ITGA2~ISM)	red
PB.42889.79(SGK1~NNC)	red
PB.58971.41(CLU~NNC)	red
PB.31400.3(STMN1~NNC)	red
PB.9143.23(ENSMFAG00000031087~ISM)	red
PB.1247.274(SULF2~FSM)	red
PB.9770.42(ENSMFAG00000030231~FSM)	red
PB.62628.156(ARID5B~ISM)	red
PB.18860.2738(KRT15~NNC)	red
PB.17175.26(TPM2~FSM)	red
PB.23097.591(LAMA3~ISM)	red
PB.30231.1774(S100A2~NNC)	red
PB.10474.2(TRIB2~FSM)	red
PB.67808.1(BEX3~NNC)	red
PB.4024.23(DUSP6~FSM)	red
PB.64491.4(GSTO1~NIC)	red
PB.23097.71(LAMA3~NNC)	red
PB.12977.107(MMP1~FSM)	red
PB.29629.3(RGS2~FSM)	red
PB.10153.390(CRIM1~NNC)	red
PB.50882.47(PLK2~FSM)	red
PB.64378.29(PI4K2A~NNC)	red
PB.41983.8(CAV1~ISM)	red
PB.29019.20(TP73~NNC)	red
PB.30231.1739(S100A2~NIC)	red
PB.5938.317(ENSMFAG00000022844~FSM)	red
PB.55190.31(CHSY1~ISM)	red
PB.7555.89(SERPINE2~FSM)	red
PB.20739.269(TSC22D1~FSM)	red
PB.17575.7(MAMDC2~FSM)	red
PB.23097.701(LAMA3~ISM)	red
PB.31512.2017(SH2D5~NNC)	red
PB.65071.143(ENSMFAG00000037375~NIC)	red
PB.61134.12(OSR2~NNC)	red
PB.30231.1775(S100A2~NNC)	red
PB.10153.435(CRIM1~ISM)	red
PB.26594.734(IVNS1ABP~NNC)	red
PB.28908.500(PLOD1~FSM)	red
PB.35163.1530(COL7A1~NIC)	red
PB.63011.1949(COL17A1~NNC)	red
PB.42194.17(CALD1~NNC)	red
PB.20062.1(PPP1R1B~FSM)	red
PB.61018.4(CA2~FSM)	red
PB.13000.20(CASP1~FSM)	red
PB.6977.9(FRZB~FSM)	red
PB.40056.42(PTN~NNC)	red
PB.18860.2705(KRT15~NIC)	red
PB.18860.4924(KRT15~ISM)	red
PB.19730.1(TMEM98~NNC)	red
PB.66543.1(ENSMFAG00000041871~FSM)	red
PB.20739.250(TSC22D1~FSM)	red
PB.7436.244(IGFBP5~FSM)	red
PB.34748.120(TNFSF10~NNC)	red
PB.31564.1(MFAP2~NNC)	red
PB.9143.196(ENSMFAG00000031087~FSM)	red
PB.34376.5(RBP1~NIC)	red
PB.6921.2(FKBP7~FSM)	red
PB.38530.52(EVA1C~FSM)	red
PB.45870.455(DST~NNC)	red
PB.3850.349(CSRP2~NIC)	red
PB.3850.652(CSRP2~ISM)	red
PB.53946.1202(TENM2~NNC)	red
PB.18840.11(ENSMFAG00000042676~NNC)	red
PB.51756.14(P4HA2~NNC)	red
PB.3842.61(NAP1L1~NIC)	red
PB.55833.15(PLEK2~FSM)	red
PB.18896.26(ETV4~FSM)	red
PB.66809.49(GPC4~FSM)	red
PB.42194.10(CALD1~NNC)	red
PB.9135.2(ITM2C~FSM)	red
PB.1672.33(CARD10~FSM)	red
PB.18840.2755(TNS4~ISM)	red
PB.5254.7(KRT7~NNC)	red
PB.25747.230(EMP3~NIC)	red
PB.18860.6108(KRT14~NIC)	red
PB.33204.8(NUPR1~NNC)	red
PB.19777.1(NGFR~FSM)	red
PB.52746.102(ITGA2~NNC)	red
PB.64069.6(P4HA1~FSM)	red
PB.59225.10(SNAI2~FSM)	red
PB.33680.426(CDH13~ISM)	red
PB.4849.1133(MGST1~FSM)	red
PB.158.47(KDELR3~FSM)	red
PB.12175.14(CAT~FSM)	red
PB.18860.6047(KRT14~NIC)	red
PB.6346.4(LYPD1~ISM)	red
PB.40938.233(SERPINE1~FSM)	red
PB.52746.1407(ITGA2~ISM)	red
PB.1212.53(PLTP~FSM)	red
PB.8971.1(WNT6~NNC)	red
PB.52747.14(FST~FSM)	red
PB.29643.25(ENSMFAG00000039896~FSM)	red
PB.18860.2702(KRT15~NNC)	red
PB.13551.171(GPHA2~NIC)	red
PB.6653.50(ITGB6~NNC)	red
PB.62523.17(DDIT4~ISM)	red
PB.64491.3(GSTO1~FSM)	red
PB.46055.1(DLK2~NNC)	red
PB.2961.168(SLC2A14~ISM)	red
PB.32485.16(RRAD~FSM)	red
PB.16061.82(IL33~NNC)	red
PB.3924.29(SLC6A15~ISM)	red
PB.50204.102(PALLD~NIC)	red
PB.67819.1(ENSMFAG00000041214~FSM)	red
PB.43954.1(GNMT~FSM)	red
PB.25747.211(EMP3~NNC)	red
PB.57004.39(TPM1~FSM)	red
PB.21379.2(COL4A1~ISM)	red
PB.18582.48(COL1A1~ISM)	red
PB.18860.2745(KRT15~NNC)	red
PB.42858.9(EPB41L2~NNC)	red
PB.35163.1481(COL7A1~NIC)	red
PB.27485.30(PHGDH~FSM)	red
PB.21471.2(TNFRSF19~FSM)	red
PB.51977.93(DPYSL3~FSM)	red
PB.53719.278(CYSTM1~NNC)	red
PB.20551.352(HMGB1~FSM)	red
PB.58971.1827(CLU~ISM)	red
PB.6346.14(LYPD1~ISM)	red
PB.58917.1(LOXL2~NIC)	red
PB.47429.61(CXCL6~FSM)	red
PB.6346.24(LYPD1~ISM)	red
PB.20095.4(EIF1~ISM)	red
PB.5818.10(HSP90B1~FSM)	red
PB.36255.18(P3H2~NNC)	red
PB.10153.92(VIT~FSM)	red
PB.46055.3(DLK2~NNC)	red
PB.24737.72(ZNF428~FSM)	red
PB.8433.77(ITGA6~ISM)	red
PB.56595.43(SPRED1~FSM)	red
PB.30320.277(TXNIP~FSM)	red
PB.45699.9(TENT5A~NNC)	red
PB.13035.1(SLC35F2~FSM)	red
PB.23097.683(LAMA3~ISM)	red
PB.40938.232(SERPINE1~FSM)	red
PB.49072.38(NIPAL1~NNC)	red
PB.41447.2(CDCA7L~FSM)	red
PB.57568.6(APEX1~FSM)	red
PB.4040.534(DCN~NNC)	red
PB.41181.3(IGFBP3~ISM)	red
PB.30619.7(F3~FSM)	red
PB.40056.81(PTN~NNC)	red
PB.32746.13(COTL1~FSM)	red
PB.29643.6(ENSMFAG00000039896~NIC)	red
PB.40945.119(ENSMFAG00000044038~NNC)	red
PB.51756.15(P4HA2~NNC)	red
PB.12982.4(MMP13~FSM)	red
PB.16887.15(TNC~NNC)	red
PB.55650.7(DHRS7~FSM)	red
PB.18840.2302(TNS4~NIC)	red
PB.68234.288(FLNA~ISM)	red
PB.8433.34(ITGA6~FSM)	red
PB.52746.111(ITGA2~NNC)	red
PB.51802.316(CXCL14~FSM)	red
PB.14166.2(CAVIN3~FSM)	red
PB.55874.97(ENSMFAG00000003078~FSM)	red
PB.34376.7(RBP1~NIC)	red
PB.12977.12(MMP1~NNC)	red
PB.13551.170(GPHA2~NNC)	red
PB.52746.138(ITGA2~ISM)	red
PB.18151.77(ENSMFAG00000037250~NNC)	red
PB.52746.560(ITGA2~NNC)	red
PB.35304.49(FAM107A~NNC)	red
PB.33323.5(MMP2~FSM)	red
PB.7436.219(IGFBP5~FSM)	red
PB.45652.26(ENSMFAG00000046691~NNC)	red
PB.26594.760(IVNS1ABP~NIC)	red
PB.63385.1(FUOM~FSM)	red
PB.67443.65(MAGED2~NNC)	red
PB.41181.11(IGFBP3~NNC)	red
PB.31564.11(MFAP2~FSM)	red
PB.25755.2174(FCGRT~FSM)	red
PB.68218.5(ENSMFAG00000032070~FSM)	red
PB.62139.2(NRP1~ISM)	red
PB.7436.239(IGFBP5~FSM)	red
PB.47150.365(RPL9~ISM)	red
PB.15885.3(DMRTA1~FSM)	red
PB.58506.115(BDKRB2~NNC)	red
PB.37383.4(ENSMFAG00000033676~FSM)	red
PB.52746.96(ITGA2~NNC)	red
PB.47653.2(HSD17B11~FSM)	red
PB.52746.112(ITGA2~NIC)	red
PB.65095.1(CXCL3~FSM)	red
PB.40056.75(PTN~NNC)	red
PB.25622.81(PLD3~NNC)	red
PB.30231.1753(S100A2~NNC)	red
PB.9572.496(TCF7L1~FSM)	red
PB.15052.6(ENSMFAG00000038555-ENSMFAG00000036272~FSM)	red
PB.948.4(TRIB3~ISM)	red
PB.65052.25(ENSMFAG00000000580~NNC)	red
PB.18582.1(COL1A1~ISM)	red
PB.60441.24(SLC39A14~NIC)	red
PB.12890.127(SESN3~FSM)	red
PB.40160.3(TCAF1~NNC)	red
PB.49383.305(HOPX~NNC)	red
PB.52892.1(PIK3R1~ISM)	red
PB.35163.1479(COL7A1~NIC)	red
PB.67359.162(TIMP1~NIC)	red
PB.47353.28(ANXA3~FSM)	red
PB.11817.66(ENSMFAG00000040595~NNC)	red
PB.17759.13(NTRK2~NNC)	red
PB.66568.7(COL4A6~NIC)	red
PB.13709.13(TP53I11~NNC)	red
PB.12108.66(LARGE2~NIC)	red
PB.42971.101(CITED2~NNC)	red
PB.17378.1(PSIP1~NNC)	red
PB.68016.159(GRIA3~ISM)	red
PB.59163.7(PLAT~FSM)	red
PB.24901.17(KLK11~NNC)	red
PB.48944.64(PCDH7~NNC)	red
PB.1381.23(PMEPA1~FSM)	red
PB.45652.1(ENSMFAG00000046691~NNC)	red
PB.23097.57(LAMA3~NNC)	red
PB.26594.863(IVNS1ABP~ISM)	red
PB.9980.310(EPAS1~FSM)	red
PB.16887.56(TNC~NNC)	red
PB.56037.3(PGF~NIC)	red
PB.291.215(TIMP3~FSM)	red
PB.49383.61(HOPX~NNC)	red
PB.52746.518(ITGA2~NNC)	red
PB.45505.619(SEC63~FSM)	red
PB.64864.2(PTMS~NNC)	red
PB.52746.123(ITGA2~ISM)	red
PB.52746.127(ITGA2~ISM)	red
PB.55228.360(AJUBA~FSM)	red
PB.40056.54(PTN~NNC)	red
PB.25631.28(LTBP4~NIC)	red
PB.21025.32(EDNRB~ISM)	red
PB.25747.210(EMP3~NNC)	red
PB.40972.101(CLIP2~ISM)	red
PB.12427.49(PARVA~ISM)	red
PB.3842.56(NAP1L1~NNC)	red
PB.26594.491(IVNS1ABP~FSM)	red
PB.17837.4(ENG~NNC)	red
PB.28241.174(GPX7~FSM)	red
PB.28922.3(ANGPTL7~FSM)	red
PB.62488.521(PLAU~NIC)	red
PB.63011.1177(COL17A1~NNC)	red
PB.62303.874(SNCG~NNC)	red
PB.58620.1(CRIP2~NNC)	red
PB.18330.433(ALDH3A1~NNC)	red
PB.9928.18(SPTBN1~ISM)	red
PB.40670.6(APP~FSM)	red
PB.62488.523(PLAU~FSM)	red
PB.25297.591(JUNB~FSM)	red
PB.40670.7(APP~FSM)	red
PB.62488.645(PLAU~NNC)	red
PB.56019.6(NPC2~NNC)	red
PB.48362.288(GASK1B~FSM)	red
PB.48362.305(GASK1B~ISM)	red
PB.19183.317(ENSMFAG00000035941~FSM)	red
PB.29888.26(ATF3~NNC)	red
PB.55035.61(MFGE8~FSM)	red
PB.11986.138(FADS2~FSM)	red
PB.31472.1(ID3~FSM)	red
PB.67393.1(MAGED1~NNC)	red
PB.51802.432(CXCL14~ISM)	red
PB.48737.139(PPP2R2C~ISM)	red
PB.63011.2401(COL17A1~NNC)	red
PB.51802.328(CXCL14~FSM)	red
PB.51802.314(CXCL14~NIC)	red
PB.17926.76(HSPA5~FSM)	red
PB.46298.1(UBD~FSM)	red
PB.63011.2222(COL17A1~NNC)	red
PB.5840.33(C12orf75~NNC)	red
PB.18330.6029(ALDH3A1~ISM)	red
PB.25106.2(GADD45B~FSM)	red
PB.44140.21(PSMB9~FSM)	red
PB.59361.26(PDE7A~FSM)	red
PB.59418.55(ENSMFAG00000039478~NNC)	red
PB.50464.202(LPCAT1~FSM)	red
PB.1135.148(MAFB~FSM)	red
PB.23798.111(SLC39A6~NNC)	red
PB.20175.2(WNT3~FSM)	red
PB.25106.45(GADD45B~FSM)	red
PB.64323.1(SLC35G1~FSM)	red
PB.5250.377(NR4A1~NNC)	red
PB.28922.262(ANGPTL7~FSM)	red
PB.57600.288(MMP14~FSM)	red
PB.17835.35(AK1~ISM)	red
PB.25106.77(GADD45B~FSM)	red
PB.30252.266(S100A10~NNC)	red
PB.32926.3(GLIS2~NIC)	red
PB.5826.97(CHST11~FSM)	red
PB.1445.109(LAMA5~NNC)	red
PB.37421.862(CACNA2D3~NNC)	red
PB.51802.436(CXCL14~ISM)	red
PB.60343.1(TUSC3~FSM)	red
PB.45505.634(SEC63~FSM)	red
PB.63011.1858(COL17A1~NNC)	red
PB.1632.1(PDGFB~FSM)	red
PB.16863.14(MEGF9~FSM)	red
PB.21025.8(EDNRB~ISM)	red
PB.58620.57(ENSMFAG00000039395~NNC)	red
PB.1445.118(LAMA5~NIC)	red
PB.7495.13(CHPF~NNC)	red
PB.60587.12(NRG1~FSM)	red
PB.59225.50(SNAI2~FSM)	red
PB.10153.397(CRIM1~ISM)	red
PB.8433.673(ITGA6~ISM)	red
PB.53946.1186(TENM2~ISM)	red
PB.36958.1071(FNDC3B~ISM)	red
PB.42112.3(CALU~FSM)	red
PB.28922.258(ANGPTL7~FSM)	red
PB.1135.237(MAFB~FSM)	red
PB.10159.3(LTBP1~NNC)	red
PB.42899.614(AHI1~NNC)	red
PB.58620.54(ENSMFAG00000039395~NIC)	red
PB.38703.3(PDGFA~ISM)	red
PB.52767.8(GPX8~NIC)	red
PB.63011.1986(COL17A1~NNC)	red
PB.58590.13(INF2~NNC)	red
PB.29566.388(LAMC2~NIC)	red
PB.4000.3(MCM2~NIC)	red
PB.52746.1463(ITGA2~NIC)	red
PB.56529.5(SCG5~NIC)	red
PB.12808.92(ME3~NNC)	red
PB.13532.14(BRMS1~NNC)	red
PB.27110.27(ENAH~ISM)	red
PB.62533.3(ENSMFAG00000029206~FSM)	red
PB.28922.241(ANGPTL7~FSM)	red
[truncated: 1,658 more rows]
