# Supplementary material for: Long-read single-cell RNA sequencing analysis of key genes and isoforms during corneal wound healing in cynomolgus monkeys
Source: Research Square preprint supplement (doi:10.21203/rs.3.rs-5232061/v1), 2025-03-05
Supplement: Supplementary file 9 [file Supplementary Data14_Keratinization associated genes.xlsx]

## Sheet: Sheet1
gene	annotation
KRT10	Keratin 10; Belongs to the intermediate filament family.
KRT12	Keratin 12; Belongs to the intermediate filament family.
KRT14	Keratin 14; Belongs to the intermediate filament family.
KRT15	Keratin 15; Belongs to the intermediate filament family.
KRT16	Keratin 16; Belongs to the intermediate filament family.
KRT17	Keratin 17; Belongs to the intermediate filament family.
KRT19	Keratin 19; Belongs to the intermediate filament family.
KRT24	Keratin 24; Belongs to the intermediate filament family.
KRT3	Keratin 3; Belongs to the intermediate filament family.
KRT5	Keratin 5; Belongs to the intermediate filament family.
KRT6A	Keratin 6A; Belongs to the intermediate filament family.
KRT7	Keratin 7; Belongs to the intermediate filament family.
KRTCAP2	Keratinocyte associated protein 2.
