# Supplementary material for: Long-read single-cell RNA sequencing analysis of key genes and isoforms during corneal wound healing in cynomolgus monkeys
Source: Research Square preprint supplement (doi:10.21203/rs.3.rs-5232061/v1), 2025-03-05
Supplement: Supplementary file 11 [file Supplementary Data2_Marker genes.xlsx]

## Sheet: Gene
p_val	avg_log2FC	pct.1	pct.2	p_val_adj	cluster	gene	annotation
0	3.83555	0.95	0.265	0	0	KRT3	TDCE
0	3.61639	0.684	0.239	0	0	KRT24	TDCE
0	2.83287	0.983	0.464	0	0	KRT12	TDCE
0	2.23174	0.787	0.147	0	0	MAL	TDCE
0	1.93325	0.947	0.39	0	0	DSG1	TDCE
0	1.76659	0.991	0.828	0	0	ADIRF	TDCE
0	1.72661	0.988	0.691	0	0	ALDH1A1	TDCE
0	1.72394	0.939	0.278	0	0	MGARP	TDCE
0	1.59803	0.343	0.029	0	0	LY6G6C	TDCE
0	1.54927	0.863	0.328	0	0	PTGS2	TDCE
0	1.47078	0.67	0.231	0	0	ENSMFAG00000032662	TDCE
0	1.46048	0.777	0.286	0	0	UACA	TDCE
0	1.41515	0.737	0.229	0	0	RB1	TDCE
0	1.39728	0.897	0.591	0	0	TUBB2A	TDCE
0	1.39501	0.857	0.406	0	0	CLDN1	TDCE
0	1.37202	0.848	0.333	0	0	CLDN7	TDCE
0	1.34563	0.809	0.352	0	0	ASPH	TDCE
0	1.34452	0.771	0.27	0	0	RHOV	TDCE
0	1.31804	0.659	0.224	0	0	RIDA	TDCE
0	1.30925	0.998	0.796	0	0	S100A4	TDCE
0	1.30795	0.943	0.561	0	0	SDC1	TDCE
0	1.28202	0.953	0.514	0	0	LYPD2	TDCE
0	1.26121	0.975	0.802	0	0	GPX1	TDCE
0	1.25722	0.964	0.574	0	0	LYPD3	TDCE
0	1.24548	0.854	0.414	0	0	DSC2	TDCE
0	1.23638	0.884	0.406	0	0	CRTAC1	TDCE
0	1.23586	0.969	0.685	0	0	LGALS3	TDCE
0	1.20622	0.885	0.429	0	0	ERICH5	TDCE
0	1.18332	0.969	0.722	0	0	ENSMFAG00000001776	TDCE
0	1.09207	0.961	0.725	0	0	PRDX5	TDCE
0	1.08371	0.991	0.838	0	0	PERP	TDCE
0	1.05049	0.872	0.485	0	0	TP53I3	TDCE
9.03734e-307	2.02932	0.374	0.052	1.28168e-302	0	CYP26A1	TDCE
3.94374e-305	1.04153	0.436	0.079	5.59301e-301	0	CLEC7A	TDCE
2.78144e-304	1.31102	0.772	0.386	3.94464e-300	0	UPK1B	TDCE
1.17989e-302	1.47068	0.672	0.274	1.67332e-298	0	LYNX1-SLURP2	TDCE
7.7089e-300	1.10398	0.484	0.113	1.09328e-295	0	EMB	TDCE
4.28609e-292	1.11357	0.723	0.319	6.07854e-288	0	MYH14	TDCE
8.13981e-264	1.09915	0.763	0.386	1.15439e-259	0	RND3	TDCE
8.20899e-263	1.01225	0.885	0.533	1.1642e-258	0	CLDN4	TDCE
9.41799e-262	1.08095	0.642	0.258	1.33566e-257	0	AGPAT2	TDCE
2.37779e-258	1.08023	0.833	0.506	3.37218e-254	0	DAPL1	TDCE
1.56226e-237	1.04184	0.564	0.203	2.2156e-233	0	FAM83A	TDCE
4.82969e-234	1.02431	0.751	0.362	6.84947e-230	0	GJB4	TDCE
2.48683e-228	1.00443	0.556	0.206	3.52682e-224	0	CPEB4	TDCE
3.83333e-228	1.40481	0.691	0.354	5.43642e-224	0	ENSMFAG00000044185	TDCE
1.9083e-199	1.15235	0.361	0.089	2.70636e-195	0	LGALSL	TDCE
1.60862e-128	1.24063	0.738	0.513	2.28135e-124	0	KRT6A	TDCE
5.46742e-120	1.92373	0.398	0.179	7.75389e-116	0	LY6D	TDCE
1.47352e-28	1.01912	0.336	0.241	2.08974e-24	0	ENSMFAG00000037676	TDCE
0	2.64391	0.818	0.377	0	1	KRT15	LSC
0	1.6378	0.915	0.548	0	1	IGFBP2	LSC
0	1.23194	0.918	0.836	0	1	ENSMFAG00000031087	LSC
6.37437e-292	1.49301	0.865	0.603	9.04013e-288	1	AQP3	LSC
2.30715e-277	1.99168	0.645	0.305	3.272e-273	1	IGFBP3	LSC
3.93552e-250	1.76423	0.742	0.461	5.58136e-246	1	DCN	LSC
2.23262e-239	1.83268	0.693	0.447	3.1663e-235	1	EPAS1	LSC
4.99499e-204	2.18324	0.709	0.45	7.08389e-200	1	S100A2	LSC
9.27858e-198	2.23408	0.774	0.665	1.31589e-193	1	CSRP2	LSC
4.17541e-196	1.73374	0.319	0.07	5.92157e-192	1	APOE	LSC
2.48145e-192	1.6213	0.565	0.303	3.5192e-188	1	GSTM5	LSC
1.00063e-181	2.76448	0.404	0.138	1.4191e-177	1	MMP1	LSC
2.17907e-178	1.20442	0.778	0.747	3.09036e-174	1	ENSMFAG00000043579	LSC
3.59801e-173	1.60633	0.361	0.112	5.1027e-169	1	G0S2	LSC
1.04857e-141	1.21974	0.701	0.59	1.48708e-137	1	SRSF7	LSC
8.31113e-127	1.12651	0.254	0.067	1.17868e-122	1	CA12	LSC
3.68799e-119	1.00599	0.91	0.921	5.23031e-115	1	JUNB	LSC
2.91759e-98	1.44637	0.411	0.225	4.13772e-94	1	TIMP3	LSC
5.66341e-95	1.40237	0.339	0.162	8.03185e-91	1	ID2	LSC
4.94157e-93	1.03371	0.478	0.299	7.00813e-89	1	BCAM	LSC
5.3581e-92	1.34907	0.485	0.302	7.59886e-88	1	TXNIP	LSC
8.87123e-90	2.13389	0.342	0.163	1.25812e-85	1	TIMP1	LSC
7.82498e-88	1.2899	0.595	0.485	1.10974e-83	1	TSC22D1	LSC
4.95457e-79	1.03593	0.701	0.626	7.02657e-75	1	GADD45B	LSC
1.73582e-77	1.29007	0.399	0.243	2.46174e-73	1	SOCS3	LSC
4.52737e-67	1.13339	0.513	0.414	6.42072e-63	1	PLK2	LSC
4.79667e-48	1.14517	0.386	0.281	6.80263e-44	1	ZFP36L2	LSC
3.73875e-40	1.09804	0.306	0.206	5.3023e-36	1	ENSMFAG00000008326	LSC
2.33766e-30	1.11108	0.581	0.575	3.31527e-26	1	ITGA2	LSC
2.00142e-17	1.99756	0.58	0.605	2.83842e-13	1	MT3	LSC
0	5.21943	0.657	0.084	0	2	S100A8	CC
0	4.54922	0.756	0.187	0	2	S100A9	CC
0	4.30033	0.64	0.035	0	2	AQP5	CC
0	4.14446	0.86	0.054	0	2	GSTA3	CC
0	4.04516	0.797	0.069	0	2	KRT4	CC
0	3.58123	0.988	0.322	0	2	ENSMFAG00000032417	CC
0	3.58082	0.624	0.023	0	2	PIP	CC
0	3.13705	0.624	0.058	0	2	SLC6A14	CC
0	2.82373	0.412	0.052	0	2	ENSMFAG00000030902	CC
0	2.7389	0.649	0.094	0	2	CXCL17	CC
0	2.68476	0.938	0.386	0	2	KRT19	CC
0	2.48667	0.522	0.111	0	2	ALDH1A3	CC
0	2.29376	0.663	0.101	0	2	CP	CC
0	2.15683	0.788	0.33	0	2	CSTA	CC
0	1.86472	0.309	0.012	0	2	ENSMFAG00000001838	CC
0	1.60015	0.989	0.786	0	2	ENSMFAG00000043424	CC
0	1.57336	0.348	0.023	0	2	TMEM45A	CC
0	1.55104	0.532	0.104	0	2	MGLL	CC
0	1.52387	0.694	0.222	0	2	MSLN	CC
0	1.38991	0.997	0.942	0	2	ENSMFAG00000037514	CC
0	1.30418	0.465	0.056	0	2	IL33	CC
0	1.28412	0.417	0.053	0	2	ENSMFAG00000039151	CC
0	1.19171	0.397	0.024	0	2	KLK11	CC
5.59983e-303	1.71804	0.459	0.084	7.94167e-299	2	GPX2	CC
1.23715e-296	2.57421	0.466	0.098	1.75452e-292	2	PI3	CC
4.71075e-283	1.04181	0.564	0.138	6.68078e-279	2	LYZ	CC
9.73863e-274	1.51621	0.349	0.048	1.38113e-269	2	MUC1	CC
4.02989e-252	1.19545	0.331	0.045	5.71519e-248	2	FAM3D	CC
2.18017e-245	1.0683	0.97	0.708	3.09192e-241	2	TACSTD2	CC
1.27546e-231	1.42307	0.995	0.938	1.80886e-227	2	ANXA1	CC
8.93854e-219	1.77071	0.411	0.097	1.26766e-214	2	KRT23	CC
1.63204e-214	1.19852	0.301	0.045	2.31456e-210	2	DHRS9	CC
2.68388e-213	1.46722	0.43	0.106	3.80628e-209	2	F3	CC
4.08653e-208	1.45979	0.965	0.808	5.79551e-204	2	ENSMFAG00000001552	CC
6.12859e-207	1.16249	0.353	0.073	8.69157e-203	2	ENSMFAG00000040216	CC
7.78706e-202	1.00234	0.95	0.643	1.10436e-197	2	ELF3	CC
2.84439e-193	1.04041	0.471	0.144	4.03392e-189	2	PTGR1	CC
4.41295e-193	1.85283	0.801	0.477	6.25844e-189	2	APOBEC3A	CC
1.01448e-191	1.13564	0.715	0.368	1.43873e-187	2	CALML3	CC
3.46187e-183	1.88673	0.521	0.217	4.90962e-179	2	TNNT3	CC
5.42904e-183	1.36517	0.294	0.054	7.69946e-179	2	ENSMFAG00000002981	CC
2.32619e-182	1.50155	0.846	0.514	3.299e-178	2	SERPINB1	CC
2.59423e-177	1.34997	0.396	0.103	3.67914e-173	2	IFITM1	CC
4.85575e-174	1.48665	0.315	0.065	6.88643e-170	2	CXCL6	CC
1.43782e-164	2.13677	0.524	0.2	2.03912e-160	2	SERPINB2	CC
1.66226e-164	1.31485	0.78	0.445	2.35742e-160	2	CD55	CC
1.2456e-163	1.24622	0.546	0.221	1.76651e-159	2	ETV3	CC
2.81888e-157	1.08427	0.764	0.469	3.99774e-153	2	PRDX6	CC
2.19168e-142	1.00621	0.363	0.104	3.10824e-138	2	KRT7	CC
9.23359e-140	1.18019	0.943	0.791	1.30951e-135	2	CSTB	CC
1.42311e-134	1.08058	0.627	0.326	2.01825e-130	2	GLO1	CC
5.43628e-131	1.14492	0.444	0.173	7.70974e-127	2	ENSMFAG00000037584	CC
4.95829e-128	1.0871	0.795	0.505	7.03185e-124	2	DSG3	CC
9.48014e-125	1.59366	0.343	0.109	1.34447e-120	2	PLAUR	CC
1.53208e-103	1.21449	0.715	0.477	2.17279e-99	2	ENSMFAG00000040595	CC
6.98108e-96	1.11373	0.753	0.492	9.90057e-92	2	HOPX	CC
5.37752e-60	1.10741	0.295	0.131	7.6264e-56	2	WFDC2	CC
0	2.40904	0.938	0.452	0	3	CXCL14	BC
0	2.34741	0.929	0.286	0	3	SPARC	BC
0	1.89583	0.639	0.12	0	3	COL7A1	BC
0	1.88984	1	0.922	0	3	ALDH3A1	BC
0	1.82197	0.646	0.159	0	3	CRLF1	BC
0	1.8145	0.842	0.301	0	3	ANGPTL7	BC
0	1.80988	0.954	0.467	0	3	COL17A1	BC
0	1.72522	0.999	0.796	0	3	TGFBI	BC
0	1.70928	0.751	0.248	0	3	HTRA1	BC
0	1.60259	0.819	0.324	0	3	ITGB4	BC
0	1.59031	0.986	0.64	0	3	TKT	BC
0	1.54036	0.843	0.297	0	3	IGFBP7	BC
0	1.52917	0.467	0.061	0	3	SLC12A7	BC
0	1.48785	0.919	0.537	0	3	ITGA6	BC
0	1.43298	0.997	0.894	0	3	CLU	BC
9.44455e-306	1.1508	0.35	0.033	1.33943e-301	3	VIT	BC
1.44673e-304	1.0606	0.991	0.884	2.05176e-300	3	ENO1	BC
1.74715e-282	1.50299	0.959	0.641	2.47781e-278	3	ENSMFAG00000000085	BC
3.63224e-279	1.54633	0.764	0.314	5.15125e-275	3	NQO1	BC
1.28496e-277	1.28954	0.407	0.061	1.82233e-273	3	ENSMFAG00000003315	BC
2.35141e-263	1.44653	0.826	0.424	3.33478e-259	3	SLC2A1	BC
2.69156e-262	1.16792	0.978	0.799	3.81716e-258	3	CTSV	BC
1.39088e-256	1.05168	0.985	0.581	1.97255e-252	3	IGFBP2	BC
1.92953e-243	1.28774	0.352	0.052	2.73646e-239	3	SYNE1	BC
1.10025e-241	1.44698	0.678	0.239	1.56038e-237	3	LAMA3	BC
2.27635e-203	1.23816	0.524	0.164	3.22831e-199	3	CPXM2	BC
2.80679e-197	1.1551	0.877	0.587	3.98059e-193	3	HSP90B1	BC
4.04151e-196	1.22049	0.795	0.436	5.73167e-192	3	IVNS1ABP	BC
3.4213e-192	1.04214	0.909	0.431	4.85209e-188	3	MGARP	BC
6.45492e-189	1.22137	0.507	0.164	9.15437e-185	3	GJB6	BC
1.19224e-187	1.23938	0.556	0.2	1.69084e-183	3	CRIM1	BC
1.86397e-172	1.00021	0.85	0.509	2.64349e-168	3	DST	BC
1.0951e-170	1.15233	0.66	0.309	1.55308e-166	3	ITGB1	BC
1.03091e-169	1.15294	0.853	0.45	1.46204e-165	3	PTGS2	BC
4.85938e-166	1.00531	0.805	0.498	6.89157e-162	3	APP	BC
2.3148e-165	1.43752	0.551	0.211	3.28285e-161	3	LAMC2	BC
3.15465e-149	1.17049	0.799	0.527	4.47393e-145	3	ENSMFAG00000043412	BC
5.82904e-146	1.01191	0.5	0.185	8.26675e-142	3	MOXD1	BC
7.7973e-138	1.18734	0.811	0.527	1.10581e-133	3	CRTAC1	BC
2.44382e-135	1.15632	0.459	0.174	3.46582e-131	3	SNCG	BC
3.15019e-134	1.86267	0.348	0.099	4.4676e-130	3	VIM	BC
7.27908e-134	1.34789	0.643	0.351	1.03232e-129	3	PLAU	BC
1.44712e-96	1.25595	0.338	0.123	2.05231e-92	3	TGM2	BC
0	2.78075	0.821	0.021	0	4	CENPF	TAC
0	2.77671	0.813	0.007	0	4	TOP2A	TAC
0	2.53579	0.664	0.005	0	4	ENSMFAG00000028239	TAC
0	2.29891	0.754	0.008	0	4	MKI67	TAC
0	2.09959	0.664	0.016	0	4	ENSMFAG00000000382	TAC
0	2.06637	0.724	0.009	0	4	CDK1	TAC
0	1.9574	0.724	0.013	0	4	ANLN	TAC
0	1.91187	0.642	0.016	0	4	CENPE	TAC
0	1.80705	0.5	0.009	0	4	CCNB1	TAC
0	1.75454	0.493	0.005	0	4	ASPM	TAC
0	1.75338	0.604	0.009	0	4	PRC1	TAC
0	1.71603	0.493	0.011	0	4	CDC20	TAC
0	1.66306	0.56	0.013	0	4	RRM2	TAC
0	1.56191	0.545	0.008	0	4	TPX2	TAC
0	1.55649	0.515	0.005	0	4	DLGAP5	TAC
0	1.52826	0.463	0.008	0	4	CCNB2	TAC
0	1.49348	0.575	0.006	0	4	KIF23	TAC
0	1.44933	0.507	0.003	0	4	SPC25	TAC
0	1.43237	0.537	0.009	0	4	BIRC5	TAC
0	1.37768	0.493	0.007	0	4	CCNA2	TAC
0	1.35823	0.515	0.007	0	4	ENSMFAG00000039976	TAC
0	1.2753	0.537	0.015	0	4	ZWINT	TAC
0	1.25538	0.485	0.006	0	4	NUF2	TAC
0	1.23822	0.545	0.017	0	4	ENSMFAG00000043866	TAC
0	1.21826	0.403	0.006	0	4	ARHGAP11A	TAC
0	1.17718	0.463	0.005	0	4	NCAPG	TAC
0	1.14017	0.381	0.004	0	4	KIF11	TAC
0	1.02161	0.343	0.004	0	4	NDC80	TAC
7.91196e-297	1.17554	0.433	0.01	1.12207e-292	4	TK1	TAC
1.7884e-264	1.03268	0.418	0.011	2.53631e-260	4	TACC3	TAC
5.2177e-251	1.4804	0.537	0.023	7.39974e-247	4	CDKN3	TAC
5.50771e-226	1.30429	0.53	0.025	7.81103e-222	4	CENPW	TAC
1.02921e-224	1.16844	0.433	0.016	1.45963e-220	4	ECT2	TAC
7.31773e-205	1.46711	0.582	0.035	1.0378e-200	4	SMC2	TAC
3.08936e-202	1.53728	0.59	0.037	4.38134e-198	4	KIF20B	TAC
5.57201e-188	1.41151	0.515	0.03	7.90223e-184	4	CKAP2	TAC
2.26195e-183	2.6191	0.925	0.123	3.2079e-179	4	HMGB2	TAC
4.09523e-183	2.74355	0.903	0.115	5.80786e-179	4	STMN1	TAC
7.57525e-181	1.12204	0.381	0.016	1.07432e-176	4	PLK1	TAC
1.36908e-174	1.03843	0.351	0.014	1.94163e-170	4	CKAP2L	TAC
7.42708e-172	1.84362	0.694	0.064	1.05331e-167	4	TYMS	TAC
4.68056e-166	1.78009	0.769	0.083	6.63797e-162	4	SMC4	TAC
3.72082e-164	2.07685	0.776	0.089	5.27686e-160	4	PTTG1	TAC
7.09354e-154	1.17865	0.396	0.021	1.00601e-149	4	ENSMFAG00000009138	TAC
1.31964e-127	1.09174	0.44	0.032	1.87151e-123	4	TMPO	TAC
1.37751e-118	1.24935	0.522	0.05	1.95359e-114	4	RNASEH2A	TAC
3.22722e-112	1.1248	0.552	0.059	4.57684e-108	4	DTYMK	TAC
1.32372e-100	1.93164	0.925	0.226	1.8773e-96	4	CKS2	TAC
4.51175e-99	1.44328	0.784	0.137	6.39856e-95	4	RRM1	TAC
1.5986e-79	2.18646	0.978	0.539	2.26713e-75	4	ENSMFAG00000003772	TAC
2.07158e-71	1.66147	0.866	0.258	2.93792e-67	4	CKS1B	TAC
3.28812e-70	1.02904	0.493	0.071	4.66322e-66	4	MCM7	TAC
2.28176e-64	1.61058	1	0.748	3.23599e-60	4	HMGB1	TAC
4.67172e-63	1.5379	1	0.805	6.62543e-59	4	H2AZ1	TAC
2.57231e-62	1.13988	0.575	0.111	3.64805e-58	4	ENSMFAG00000001891	TAC
3.93173e-60	1.48554	0.642	0.144	5.57598e-56	4	KPNA2	TAC
3.31988e-55	1.21697	1	0.876	4.70826e-51	4	TUBA1A	TAC
3.82863e-54	1.06385	0.56	0.115	5.42976e-50	4	CENPX	TAC
1.38605e-48	1.42714	0.955	0.478	1.96569e-44	4	H2AZ2	TAC
3.62791e-42	1.17566	0.716	0.223	5.1451e-38	4	ENSMFAG00000040651	TAC
1.07072e-40	1.18727	0.828	0.319	1.5185e-36	4	ENSMFAG00000037325	TAC
3.69127e-35	1.0527	0.776	0.311	5.23496e-31	4	ENSMFAG00000043279	TAC
5.42639e-35	1.15302	0.985	0.634	7.69571e-31	4	TUBA1C	TAC
5.55775e-35	1.47176	0.5	0.133	7.882e-31	4	VIM	TAC
7.24284e-33	1.37628	0.746	0.322	1.02718e-28	4	ENSMFAG00000042475	TAC
3.56033e-32	1.05988	0.799	0.339	5.04926e-28	4	ENSMFAG00000003238	TAC
4.96507e-32	1.14477	0.799	0.349	7.04147e-28	4	UBE2S	TAC
5.86742e-32	1.00489	0.985	0.856	8.32117e-28	4	ENSMFAG00000031087	TAC
9.43644e-32	1.03567	0.433	0.105	1.33828e-27	4	ENSMFAG00000036985	TAC
1.87787e-29	1.20103	0.493	0.141	2.66319e-25	4	RBP1	TAC
6.18966e-28	1.01699	0.791	0.37	8.77818e-24	4	RANBP1	TAC
2.82709e-25	1.00343	0.634	0.24	4.00938e-21	4	ENSMFAG00000030485	TAC
1.14224e-22	1.3188	0.851	0.556	1.61992e-18	4	KRT14	TAC
3.73997e-17	1.05103	0.604	0.29	5.30402e-13	4	KRT17	TAC

## Sheet: Isoform
p_val	avg_log2FC	pct.1	pct.2	p_val_adj	cluster	isoform	annotation
0	4.18926	0.958	0.246	0	0	PB.3575.9659(KRT3~NNC)	TDCE
0	1.81717	0.851	0.228	0	0	PB.48169.1311(MGARP~FSM)	TDCE
0	3.02571	0.952	0.337	0	0	PB.18846.2216(KRT12~FSM)	TDCE
0	2.05832	0.791	0.197	0	0	PB.48169.1472(MGARP~FSM)	TDCE
0	3.0101	0.654	0.109	0	0	PB.10605.20(MAL~FSM)	TDCE
0	2.76413	0.644	0.105	0	0	PB.18846.2345(KRT12~NNC)	TDCE
0	1.74585	0.808	0.28	0	0	PB.26616.12(PTGS2~FSM)	TDCE
0	1.32793	0.825	0.324	0	0	PB.62925.58(CRTAC1~NNC)	TDCE
0	1.63761	0.794	0.3	0	0	PB.18116.1050(CLDN7~NNC)	TDCE
0	3.91324	0.523	0.044	0	0	PB.3575.12430(KRT3~ISM)	TDCE
0	1.56814	0.725	0.26	0	0	PB.61119.9(ERICH5~FSM)	TDCE
0	2.08686	0.717	0.256	0	0	PB.17669.2(ENSMFAG00000032662~FSM)	TDCE
0	2.75228	0.536	0.085	0	0	PB.18846.5018(KRT12~FSM)	TDCE
0	3.77525	0.653	0.204	0	0	PB.18846.38(KRT24~FSM)	TDCE
0	1.23827	0.915	0.472	0	0	PB.60149.240(LYPD2~NNC)	TDCE
0	2.64743	0.531	0.103	0	0	PB.23012.1585(DSG1~ISM)	TDCE
0	2.24056	0.56	0.139	0	0	PB.23012.1174(DSG1~ISM)	TDCE
0	1.53604	0.788	0.367	0	0	PB.11608.2(SDC1~NNC)	TDCE
0	1.63098	0.889	0.469	0	0	PB.62303.625(ADIRF~NIC)	TDCE
0	3.06801	0.492	0.075	0	0	PB.10605.1(MAL~NNC)	TDCE
0	2.33188	0.481	0.099	0	0	PB.23012.1423(DSG1~NNC)	TDCE
0	1.89181	0.98	0.636	0	0	PB.16246.186(ALDH1A1~FSM)	TDCE
0	3.02575	0.382	0.045	0	0	PB.18846.2132(KRT12~FSM)	TDCE
0	1.22234	0.957	0.705	0	0	PB.11950.49(PRDX5~FSM)	TDCE
0	1.30431	0.99	0.757	0	0	PB.30231.2062(S100A4~FSM)	TDCE
0	1.83014	0.989	0.783	0	0	PB.62303.626(ADIRF~FSM)	TDCE
0	1.15818	0.985	0.795	0	0	PB.42937.111(PERP~FSM)	TDCE
0	1.32861	0.975	0.79	0	0	PB.35163.5040(GPX1~ISM)	TDCE
2.97374e-304	2.02027	0.659	0.258	1.37506e-299	0	PB.60149.404(LYNX1-SLURP2~FSM)	TDCE
1.73568e-286	1.53332	0.733	0.321	8.02579e-282	0	PB.65364.368(LYPD3~FSM)	TDCE
1.42365e-278	1.67267	0.727	0.351	6.58295e-274	0	PB.35814.56(UPK1B~NNC)	TDCE
7.12427e-276	3.76546	0.318	0.035	3.29426e-271	0	PB.18846.1297(KRT24~FSM)	TDCE
8.00927e-276	1.61445	0.66	0.25	3.70349e-271	0	PB.36252.12(CLDN1~NNC)	TDCE
3.59589e-275	1.92148	0.544	0.167	1.66274e-270	0	PB.54285.948(RHOV~FSM)	TDCE
1.23898e-268	1.32714	0.814	0.455	5.72905e-264	0	PB.8261.10(DAPL1~FSM)	TDCE
1.14896e-249	2.08759	0.471	0.127	5.31278e-245	0	PB.59650.330(RIDA~FSM)	TDCE
8.73639e-241	1.62317	0.598	0.229	4.03971e-236	0	PB.11608.1(SDC1~NNC)	TDCE
1.59275e-240	2.74323	0.316	0.042	7.36488e-236	0	PB.18846.2210(KRT12~NIC)	TDCE
5.92405e-239	1.68693	0.591	0.228	2.73928e-234	0	PB.16671.1(AGPAT2~FSM)	TDCE
2.18217e-237	1.20366	0.821	0.455	1.00903e-232	0	PB.40967.90(CLDN4~FSM)	TDCE
2.8301e-229	2.55273	0.32	0.048	1.30864e-224	0	PB.18846.5136(KRT12~FSM)	TDCE
1.81919e-216	1.88461	0.448	0.132	8.41192e-212	0	PB.54285.937(RHOV~NIC)	TDCE
8.73135e-212	2.75215	0.284	0.04	4.03738e-207	0	PB.21840.925(RB1~FSM)	TDCE
2.39446e-203	1.70493	0.453	0.136	1.1072e-198	0	PB.16246.697(ALDH1A1~FSM)	TDCE
1.43011e-202	2.61205	0.284	0.042	6.61281e-198	0	PB.18846.3705(KRT12~NNC)	TDCE
2.37098e-202	1.56264	0.44	0.124	1.09634e-197	0	PB.26616.225(PTGS2~FSM)	TDCE
1.56608e-201	1.09483	0.707	0.356	7.24156e-197	0	PB.57971.516(LGALS3~NNC)	TDCE
3.47504e-200	1.1891	0.687	0.323	1.60686e-195	0	PB.42937.882(PERP~NNC)	TDCE
1.25191e-199	1.27834	0.659	0.305	5.78884e-195	0	PB.11578.19(TP53I3~FSM)	TDCE
2.648e-199	2.8104	0.284	0.045	1.22443e-194	0	PB.47116.12(RELL1~FSM)	TDCE
1.04934e-192	1.19598	0.644	0.297	4.85215e-188	0	PB.4815.2(EMP1~NIC)	TDCE
8.05092e-192	2.68846	0.267	0.039	3.72274e-187	0	PB.15355.37(GSN~FSM)	TDCE
7.84961e-183	1.54335	0.47	0.164	3.62966e-178	0	PB.9474.42(MALL~FSM)	TDCE
7.50549e-180	1.1257	0.684	0.342	3.47054e-175	0	PB.43358.552(CRYBG1~ISM)	TDCE
2.03122e-179	2.64738	0.262	0.042	9.39238e-175	0	PB.3000.105(CLEC7A~ISM)	TDCE
1.87088e-177	2.47517	0.261	0.041	8.65093e-173	0	PB.18846.2227(KRT12~NIC)	TDCE
1.05189e-176	1.35206	0.583	0.267	4.86392e-172	0	PB.19189.863(EVPL~FSM)	TDCE
3.75641e-175	1.18387	0.62	0.281	1.73696e-170	0	PB.61119.10(ERICH5~FSM)	TDCE
3.45486e-171	1.5392	0.382	0.106	1.59753e-166	0	PB.26616.184(PTGS2~FSM)	TDCE
1.50136e-170	2.73638	0.283	0.059	6.94227e-166	0	PB.9821.7(LGALSL~FSM)	TDCE
3.0815e-164	1.26804	0.839	0.509	1.42488e-159	0	PB.30231.2086(S100A4~FSM)	TDCE
2.20786e-163	1.63952	0.442	0.16	1.02091e-158	0	PB.6510.59(RND3~NIC)	TDCE
6.22393e-160	1.48535	0.396	0.123	2.87795e-155	0	PB.19873.1(TOM1L1~NNC)	TDCE
1.69103e-156	1.13628	0.669	0.353	7.8193e-152	0	PB.31926.562(EMP2~FSM)	TDCE
2.27044e-156	1.18792	0.525	0.215	1.04985e-151	0	PB.494.125(BCL2L13~NNC)	TDCE
3.94613e-144	1.31283	0.441	0.165	1.82469e-139	0	PB.36252.21(CLDN1~NNC)	TDCE
1.30978e-142	2.12486	0.258	0.056	6.05643e-138	0	PB.26616.261(PTGS2~FSM)	TDCE
3.60176e-138	1.85387	0.334	0.106	1.66546e-133	0	PB.15083.936(CYSRT1~ISM)	TDCE
2.47046e-137	1.28318	0.447	0.175	1.14234e-132	0	PB.11876.97(CCND1~FSM)	TDCE
4.37488e-137	1.96422	0.303	0.087	2.02295e-132	0	PB.62818.51(PPP1R3C~FSM)	TDCE
9.68771e-132	1.23717	0.512	0.238	4.4796e-127	0	PB.29701.16(ELF3~FSM)	TDCE
4.87545e-129	1.37731	0.446	0.191	2.25441e-124	0	PB.24310.360(GIPC1~NNC)	TDCE
5.03341e-129	1.92578	0.408	0.189	2.32745e-124	0	PB.30231.2106(S100A4~FSM)	TDCE
1.97421e-125	1.8856	0.28	0.078	9.12874e-121	0	PB.27401.612(TUFT1~FSM)	TDCE
3.97472e-125	1.41928	0.333	0.106	1.83791e-120	0	PB.30141.747(TSTD1~FSM)	TDCE
2.82711e-123	1.19091	0.451	0.194	1.30725e-118	0	PB.31885.1005(PPL~ISM)	TDCE
2.18878e-117	1.02943	0.52	0.253	1.01209e-112	0	PB.61351.16(MAL2~NNC)	TDCE
1.45557e-115	1.31129	0.404	0.165	6.73057e-111	0	PB.11578.7(TP53I3~NNC)	TDCE
1.60193e-115	1.10463	0.477	0.219	7.40732e-111	0	PB.2918.739(SCNN1A~NNC)	TDCE
3.39013e-115	1.3033	0.422	0.184	1.5676e-110	0	PB.57863.555(ARF6~NNC)	TDCE
1.90975e-114	1.19584	0.474	0.223	8.83067e-110	0	PB.27317.3159(RAB25~FSM)	TDCE
2.35328e-113	1.41896	0.309	0.1	1.08816e-108	0	PB.7614.108(PID1~FSM)	TDCE
4.19314e-111	1.21057	0.411	0.176	1.93891e-106	0	PB.62348.47(PPIF~FSM)	TDCE
9.58645e-111	1.11843	0.453	0.205	4.43277e-106	0	PB.30231.2119(S100A4~NIC)	TDCE
1.36667e-110	1.19017	0.369	0.142	6.31946e-106	0	PB.11578.1(TP53I3~NNC)	TDCE
9.94453e-110	1.09626	0.471	0.221	4.59835e-105	0	PB.17632.194(OSTF1~FSM)	TDCE
2.15714e-107	1.48172	0.332	0.125	9.97463e-103	0	PB.12834.460(CTSC~FSM)	TDCE
4.37347e-106	1.23313	0.375	0.15	2.02229e-101	0	PB.57281.5(ZFAND6~NNC)	TDCE
9.86565e-106	1.1177	0.455	0.216	4.56188e-101	0	PB.11911.1760(RHOD~FSM)	TDCE
1.39674e-102	1.39714	0.316	0.116	6.45853e-98	0	PB.50186.1(MSMO1~FSM)	TDCE
1.04865e-99	1.00988	0.429	0.198	4.84894e-95	0	PB.30206.11(PMVK~FSM)	TDCE
1.84789e-99	1.22998	0.302	0.104	8.54466e-95	0	PB.22278.5(MBNL2~NNC)	TDCE
5.05131e-97	1.54405	0.301	0.113	2.33573e-92	0	PB.50801.63(HMGCS1~FSM)	TDCE
2.43476e-96	1.57677	0.26	0.085	1.12583e-91	0	PB.57281.8(ZFAND6~NNC)	TDCE
5.89999e-96	1.48854	0.3	0.112	2.72816e-91	0	PB.3555.136(SMAGP~FSM)	TDCE
4.76554e-94	1.01794	0.42	0.195	2.20358e-89	0	PB.1903.467(ATP6V1E1~FSM)	TDCE
2.68131e-93	1.54846	0.261	0.086	1.23984e-88	0	PB.46086.1012(C6orf132~NNC)	TDCE
3.17243e-92	1.19347	0.315	0.122	1.46693e-87	0	PB.13526.564(CLCF1~NNC)	TDCE
1.4316e-89	1.18887	0.357	0.153	6.6197e-85	0	PB.45416.86(PPP1R14C~NNC)	TDCE
5.94337e-87	1.24135	0.3	0.117	2.74821e-82	0	PB.57863.475(ARF6~NNC)	TDCE
7.9793e-87	1.28495	0.317	0.131	3.68963e-82	0	PB.30231.2067(S100A4~NNC)	TDCE
1.69812e-84	1.2438	0.323	0.136	7.85211e-80	0	PB.49342.246(TMPRSS11D~FSM)	TDCE
1.95757e-83	1.30729	0.333	0.146	9.0518e-79	0	PB.41510.6(AGR2~FSM)	TDCE
3.14611e-80	1.21353	0.271	0.101	1.45476e-75	0	PB.57206.45(UBE2Q2~FSM)	TDCE
9.8799e-80	1.2498	0.303	0.126	4.56847e-75	0	PB.44050.215(PIM1~FSM)	TDCE
1.28717e-73	1.22614	0.25	0.093	5.95187e-69	0	PB.44529.282(DSP~ISM)	TDCE
3.45287e-72	1.15347	0.269	0.108	1.59661e-67	0	PB.45416.149(PPP1R14C~FSM)	TDCE
5.60145e-72	1.15092	0.28	0.116	2.59011e-67	0	PB.43803.343(FAM83B~NNC)	TDCE
5.33314e-71	1.18431	0.308	0.138	2.46605e-66	0	PB.6686.461(GALNT3~NNC)	TDCE
4.11025e-68	1.13421	0.282	0.121	1.90058e-63	0	PB.22532.45(CNDP2~FSM)	TDCE
2.55452e-66	1.02801	0.313	0.144	1.18121e-61	0	PB.167.218(MAFF~FSM)	TDCE
8.17107e-65	1.06981	0.295	0.132	3.7783e-60	0	PB.12131.111(CD82~NNC)	TDCE
2.1139e-63	1.1038	0.25	0.103	9.77466e-59	0	PB.10268.1951(ENSMFAG00000002856~NNC)	TDCE
5.09772e-61	1.03994	0.281	0.127	2.35718e-56	0	PB.57863.567(ARF6~NNC)	TDCE
2.05204e-56	1.04906	0.253	0.11	9.48862e-52	0	PB.44529.2140(DSP~NIC)	TDCE
6.57496e-49	1.00426	0.255	0.125	3.04026e-44	0	PB.57060.411(RAB11A~FSM)	TDCE
6.06313e-32	1.22814	0.273	0.169	2.80359e-27	0	PB.3575.416(ENSMFAG00000037676~FSM)	TDCE
0	2.66745	0.795	0.352	0	1	PB.18860.2694(KRT15~FSM)	LSC
0	1.72012	0.909	0.541	0	1	PB.8923.5(IGFBP2~NNC)	LSC
1.1273e-256	1.56813	0.838	0.58	5.21261e-252	1	PB.17218.1822(AQP3~FSM)	LSC
2.72435e-201	3.56508	0.287	0.049	1.25974e-196	1	PB.25692.1768(APOE~NNC)	LSC
1.79632e-194	3.76104	0.388	0.115	8.30619e-190	1	PB.12977.63(MMP1~NNC)	LSC
8.05261e-190	2.75595	0.53	0.248	3.72353e-185	1	PB.30231.1875(S100A2~FSM)	LSC
1.43002e-187	2.34557	0.744	0.602	6.61242e-183	1	PB.3850.481(CSRP2~FSM)	LSC
2.24434e-177	2.78016	0.424	0.161	1.03778e-172	1	PB.41181.1(IGFBP3~FSM)	LSC
1.11338e-165	3.03655	0.346	0.106	5.14826e-161	1	PB.4040.256(DCN~FSM)	LSC
6.41101e-146	2.39754	0.436	0.202	2.96445e-141	1	PB.27645.10(GSTM5~FSM)	LSC
5.6843e-140	1.61148	0.61	0.445	2.62842e-135	1	PB.9143.18(ENSMFAG00000031087~FSM)	LSC
3.14755e-129	2.5896	0.478	0.261	1.45543e-124	1	PB.30231.1742(S100A2~FSM)	LSC
1.95733e-121	1.42781	0.652	0.576	9.05069e-117	1	PB.53973.4(ENSMFAG00000043579~NNC)	LSC
7.40599e-118	2.66668	0.292	0.099	3.42453e-113	1	PB.18860.2703(KRT15~NNC)	LSC
1.63995e-101	2.17397	0.326	0.138	7.58313e-97	1	PB.41181.40(IGFBP3~NNC)	LSC
2.15896e-76	1.59119	0.553	0.439	9.98304e-72	1	PB.20739.31(TSC22D1~FSM)	LSC
1.65523e-55	1.1731	0.721	0.737	7.65379e-51	1	PB.25297.591(JUNB~FSM)	LSC
4.92155e-47	1.13493	0.527	0.477	2.27573e-42	1	PB.19183.317(ENSMFAG00000035941~FSM)	LSC
1.94983e-44	1.33637	0.384	0.266	9.01599e-40	1	PB.49371.5(IGFBP7~FSM)	LSC
5.76098e-43	1.82487	0.284	0.176	2.66388e-38	1	PB.13192.505(H2AX~FSM)	LSC
7.32648e-43	1.44781	0.383	0.286	3.38777e-38	1	PB.43930.549(HSP90AB1~ISM)	LSC
1.2112e-39	1.25563	0.434	0.362	5.60061e-35	1	PB.9143.85(ENSMFAG00000031087~FSM)	LSC
2.69055e-37	1.54405	0.371	0.285	1.24411e-32	1	PB.50882.47(PLK2~FSM)	LSC
5.69365e-31	1.46956	0.289	0.196	2.63275e-26	1	PB.30320.276(TXNIP~FSM)	LSC
7.89632e-30	1.07285	0.438	0.392	3.65126e-25	1	PB.43930.458(HSP90AB1~ISM)	LSC
1.15223e-29	1.5301	0.296	0.209	5.32793e-25	1	PB.9143.196(ENSMFAG00000031087~FSM)	LSC
2.67718e-24	1.03447	0.46	0.414	1.23793e-19	1	PB.31472.1(ID3~FSM)	LSC
2.95184e-24	1.26637	0.284	0.208	1.36493e-19	1	PB.17926.76(HSPA5~FSM)	LSC
5.18728e-22	1.44043	0.275	0.21	2.3986e-17	1	PB.52938.166(ENSMFAG00000038283~FSM)	LSC
4.05384e-20	1.50436	0.291	0.231	1.87449e-15	1	PB.11308.852(ZFP36L2~FSM)	LSC
5.32294e-17	1.25153	0.319	0.279	2.46133e-12	1	PB.25745.78(NOP53~FSM)	LSC
2.76236e-14	2.04181	0.563	0.591	1.27732e-09	1	PB.33333.1(MT3~NNC)	LSC
2.97942e-12	1.19619	0.308	0.282	1.37768e-07	1	PB.45213.1(RPS12~NNC)	LSC
3.39449e-10	1.21725	0.258	0.227	1.56961e-05	1	PB.34748.120(TNFSF10~NNC)	LSC
9.22376e-10	1.0667	0.292	0.27	4.26507e-05	1	PB.5290.99(ENSMFAG00000031561~NNC)	LSC
9.25494e-09	1.02164	0.274	0.248	0.000427949	1	PB.9143.821(ENSMFAG00000031087~FSM)	LSC
1.21795e-06	1.07483	0.317	0.317	0.0563182	1	PB.25106.77(GADD45B~FSM)	LSC
9.61897e-06	1.0575	0.365	0.396	0.444781	1	PB.5190.231(TUBA1C~FSM)	LSC
0.00107905	1.00164	0.264	0.264	1	1	PB.25106.45(GADD45B~FSM)	LSC
0	5.16327	0.77	0.061	0	2	PB.3575.12845(KRT4~FSM)	CC
0	3.78753	0.984	0.291	0	2	PB.18860.47(ENSMFAG00000032417~FSM)	CC
0	2.83376	0.936	0.369	0	2	PB.18860.4957(KRT19~FSM)	CC
0	4.79573	0.739	0.174	0	2	PB.27361.1111(S100A9~FSM)	CC
0	6.81805	0.582	0.018	0	2	PB.42290.13(PIP~FSM)	CC
0	6.4157	0.636	0.08	0	2	PB.30231.2825(S100A8~NNC)	CC
0	4.46407	0.597	0.079	0	2	PB.24723.948(CXCL17~NNC)	CC
0	4.0823	0.543	0.039	0	2	PB.18860.49(ENSMFAG00000032417~NIC)	CC
0	6.31977	0.499	0.009	0	2	PB.45926.44(GSTA3~ISM)	CC
0	2.47462	0.596	0.146	0	2	PB.32853.84(MSLN~NNC)	CC
0	2.4475	0.767	0.322	0	2	PB.35764.15(CSTA~FSM)	CC
0	3.64829	0.457	0.05	0	2	PB.34474.117(CP~FSM)	CC
0	7.31829	0.37	0.004	0	2	PB.5218.5(AQP5~NNC)	CC
0	4.24547	0.338	0.02	0	2	PB.18860.50(ENSMFAG00000032417~NNC)	CC
0	6.3795	0.321	0.005	0	2	PB.45926.6(GSTA3~NIC)	CC
0	4.95348	0.345	0.035	0	2	PB.56699.83(ENSMFAG00000030902~FSM)	CC
0	5.33028	0.31	0.012	0	2	PB.67931.13(SLC6A14~FSM)	CC
0	5.81662	0.273	0.003	0	2	PB.45926.24(GSTA3~NNC)	CC
0	5.66363	0.252	0.005	0	2	PB.45926.43(GSTA3~ISM)	CC
0	1.61891	0.99	0.77	0	2	PB.61000.9(ENSMFAG00000043424~FSM)	CC
0	1.39173	0.996	0.932	0	2	PB.30252.17(ENSMFAG00000037514~FSM)	CC
5.47806e-298	4.94751	0.26	0.011	2.53305e-293	2	PB.67931.8(SLC6A14~FSM)	CC
2.72862e-280	1.81846	0.532	0.125	1.26172e-275	2	PB.5447.1(LYZ~FSM)	CC
7.58988e-269	2.7519	0.33	0.037	3.50956e-264	2	PB.16061.30(IL33~NNC)	CC
1.57599e-266	3.46621	0.421	0.085	7.2874e-262	2	PB.2484.46(PI3~FSM)	CC
1.67463e-263	1.89409	0.727	0.308	7.74351e-259	2	PB.5327.2198(ENSMFAG00000033843~NIC)	CC
1.65976e-218	3.76296	0.284	0.038	7.67472e-214	2	PB.57547.60(ALDH1A3~NIC)	CC
1.09143e-215	2.20765	0.369	0.071	5.04676e-211	2	PB.23434.2(ENSMFAG00000030228~FSM)	CC
4.7738e-194	2.21422	0.414	0.11	2.20741e-189	2	PB.16968.2(PTGR1~NNC)	CC
1.66444e-191	1.63076	0.624	0.266	7.69638e-187	2	PB.63453.26(CALML3~FSM)	CC
2.9289e-191	2.75155	0.352	0.078	1.35432e-186	2	PB.18846.5512(KRT23~FSM)	CC
1.01405e-184	1.38661	0.959	0.835	4.68896e-180	2	PB.17617.22(ANXA1~NNC)	CC
1.66853e-171	1.80898	0.377	0.096	7.71529e-167	2	PB.6030.6(HSPB8~FSM)	CC
2.36788e-169	2.37449	0.285	0.053	1.09491e-164	2	PB.47429.6(CXCL6~FSM)	CC
3.65997e-162	1.21465	0.74	0.412	1.69237e-157	2	PB.30252.171(ENSMFAG00000037514~FSM)	CC
1.10794e-159	1.50732	0.677	0.352	5.12313e-155	2	PB.29449.1(PRDX6~NNC)	CC
1.73353e-159	2.84667	0.254	0.045	8.01582e-155	2	PB.27879.68(ENSMFAG00000040216~NNC)	CC
9.90368e-157	1.84534	0.726	0.422	4.57946e-152	2	PB.155.352(APOBEC3A~FSM)	CC
2.81253e-155	1.79543	0.293	0.06	1.30052e-150	2	PB.7555.23(SERPINE2~FSM)	CC
5.45463e-155	1.05052	0.843	0.528	2.52222e-150	2	PB.31017.18(TACSTD2~FSM)	CC
5.68421e-145	1.51335	0.91	0.71	2.62838e-140	2	PB.17617.1(ANXA1~NNC)	CC
2.18403e-138	1.95338	0.494	0.209	1.0099e-133	2	PB.155.446(APOBEC3A~NNC)	CC
3.25906e-137	2.12226	0.281	0.065	1.50699e-132	2	PB.56309.66(DEGS2~FSM)	CC
6.83519e-135	1.83299	0.49	0.201	3.16059e-130	2	PB.49383.17(HOPX~NNC)	CC
9.73202e-130	1.45738	0.686	0.397	4.50009e-125	2	PB.46682.12(SERPINB1~FSM)	CC
4.26372e-129	2.22475	0.272	0.065	1.97154e-124	2	PB.155.363(APOBEC3A~NIC)	CC
7.23377e-129	1.21548	0.692	0.373	3.3449e-124	2	PB.29701.2(ELF3~NIC)	CC
2.34075e-128	1.91659	0.306	0.082	1.08236e-123	2	PB.55210.86(NDRG2~NNC)	CC
5.16701e-128	2.49251	0.443	0.172	2.38922e-123	2	PB.22582.671(SERPINB2~FSM)	CC
2.21434e-121	2.06076	0.268	0.067	1.02391e-116	2	PB.533.11(ENSMFAG00000001311~FSM)	CC
1.43089e-118	1.67469	0.496	0.224	6.61644e-114	2	PB.46682.13(SERPINB1~NNC)	CC
6.47173e-116	1.56399	0.476	0.214	2.99253e-111	2	PB.46682.4(SERPINB1~FSM)	CC
1.82614e-114	1.61639	0.282	0.076	8.44405e-110	2	PB.5254.21(KRT7~FSM)	CC
1.92752e-114	1.63977	0.321	0.098	8.91287e-110	2	PB.41508.3(AGR3~FSM)	CC
5.54947e-103	2.01681	0.274	0.082	2.56608e-98	2	PB.45518.6(ENSMFAG00000037584~FSM)	CC
6.68569e-100	1.82477	0.32	0.111	3.09146e-95	2	PB.49383.33(HOPX~NNC)	CC
3.48117e-99	1.74811	0.431	0.187	1.60969e-94	2	PB.49383.34(HOPX~NNC)	CC
1.62608e-98	1.61809	0.357	0.133	7.51901e-94	2	PB.46127.9(GLO1~FSM)	CC
3.71439e-96	1.38279	0.305	0.1	1.71753e-91	2	PB.51311.20(ELL2~FSM)	CC
3.76607e-94	1.34921	0.69	0.459	1.74143e-89	2	PB.11817.107(ENSMFAG00000040595~FSM)	CC
5.46555e-89	1.72548	0.279	0.093	2.52727e-84	2	PB.45518.2(ENSMFAG00000037584~NIC)	CC
4.44029e-88	1.4931	0.335	0.13	2.05319e-83	2	PB.46127.2(GLO1~NNC)	CC
3.30263e-87	1.26245	0.653	0.398	1.52714e-82	2	PB.23012.407(DSG3~FSM)	CC
1.88252e-85	1.78405	0.271	0.091	8.70476e-81	2	PB.11684.3(ENSMFAG00000038147~FSM)	CC
4.04752e-80	1.30371	0.325	0.128	1.87157e-75	2	PB.15679.3(GALNT12~NNC)	CC
7.57719e-80	1.18427	0.414	0.19	3.50369e-75	2	PB.5209.9(TMBIM6~FSM)	CC
1.21885e-79	1.38911	0.35	0.143	5.63594e-75	2	PB.49383.9(HOPX~NNC)	CC
3.29177e-79	1.13195	0.471	0.226	1.52212e-74	2	PB.11921.35(CST6~FSM)	CC
3.87408e-79	1.27337	0.304	0.114	1.79138e-74	2	PB.29701.14(ELF3~NIC)	CC
7.24668e-79	1.45056	0.274	0.096	3.35087e-74	2	PB.46682.22(SERPINB1~FSM)	CC
1.07516e-76	1.28493	0.456	0.225	4.97152e-72	2	PB.31309.327(MARCKSL1~FSM)	CC
1.28255e-76	1.44274	0.262	0.091	5.93051e-72	2	PB.17617.23(ANXA1~NNC)	CC
1.41599e-76	1.09388	0.521	0.281	6.54754e-72	2	PB.47419.89(AREG~FSM)	CC
7.80264e-73	1.03083	0.431	0.208	3.60794e-68	2	PB.21840.339(ITM2B~NIC)	CC
4.95272e-72	1.01899	0.352	0.151	2.29014e-67	2	PB.12971.50(TMEM123~NNC)	CC
6.66719e-71	1.28294	0.304	0.122	3.08291e-66	2	PB.46682.10(SERPINB1~FSM)	CC
3.2491e-68	1.05485	0.408	0.198	1.50238e-63	2	PB.13818.353(ENSMFAG00000032872~FSM)	CC
3.98967e-68	1.12691	0.378	0.177	1.84482e-63	2	PB.2997.96(CLEC2B~FSM)	CC
4.77005e-66	1.13324	0.269	0.101	2.20567e-61	2	PB.65533.17(AKR1A1~NIC)	CC
1.34398e-63	1.36011	0.313	0.138	6.21458e-59	2	PB.29803.38(CD55~NIC)	CC
7.68921e-63	2.08912	0.273	0.114	3.55549e-58	2	PB.2495.381(WFDC2~FSM)	CC
2.43105e-57	1.22104	0.326	0.153	1.12412e-52	2	PB.52975.6(F2RL1~NNC)	CC
3.67436e-40	1.35536	0.383	0.222	1.69903e-35	2	PB.31366.3(IFI6~FSM)	CC
0	2.84504	0.892	0.252	0	3	PB.52058.73(SPARC~NNC)	BC
0	2.7891	0.66	0.147	0	3	PB.51802.42(CXCL14~FSM)	BC
0	2.31793	0.783	0.28	0	3	PB.28922.3(ANGPTL7~FSM)	BC
0	2.51841	0.854	0.358	0	3	PB.51802.333(CXCL14~FSM)	BC
0	2.93027	0.584	0.1	0	3	PB.35163.1545(COL7A1~ISM)	BC
0	2.05524	0.966	0.648	0	3	PB.58971.40(CLU~NNC)	BC
0	1.90228	1	0.905	0	3	PB.18330.423(ALDH3A1~FSM)	BC
1.4418e-294	3.36016	0.429	0.067	6.66689e-290	3	PB.24367.982(CRLF1~NNC)	BC
2.65722e-293	1.42533	0.959	0.719	1.2287e-288	3	PB.31671.7(ENO1~NNC)	BC
6.89984e-259	1.32972	0.97	0.751	3.19049e-254	3	PB.16612.527(CTSV~FSM)	BC
3.73598e-250	3.16889	0.358	0.05	1.72752e-245	3	PB.15240.1(ENSMFAG00000003315~NNC)	BC
2.32825e-248	1.08871	0.983	0.575	1.07658e-243	3	PB.8923.5(IGFBP2~NNC)	BC
3.22188e-229	1.66352	0.67	0.228	1.4898e-224	3	PB.49371.5(IGFBP7~FSM)	BC
9.46537e-226	3.68209	0.255	0.022	4.37679e-221	3	PB.10153.90(VIT~FSM)	BC
8.89663e-223	2.13611	0.609	0.211	4.1138e-218	3	PB.32519.432(NQO1~FSM)	BC
1.05195e-198	2.7847	0.326	0.054	4.86423e-194	3	PB.52058.63(SPARC~NNC)	BC
5.60838e-187	2.80584	0.35	0.07	2.59332e-182	3	PB.24367.985(CRLF1~NNC)	BC
2.77739e-177	2.58055	0.305	0.052	1.28427e-172	3	PB.49371.4(IGFBP7~NNC)	BC
2.68434e-171	2.32348	0.441	0.131	1.24124e-166	3	PB.63245.134(CPXM2~FSM)	BC
1.70374e-157	1.30305	0.78	0.379	7.87812e-153	3	PB.48169.1311(MGARP~FSM)	BC
4.24145e-149	1.66617	0.59	0.259	1.96125e-144	3	PB.31193.2(SLC2A1~NNC)	BC
4.88789e-138	2.35136	0.374	0.112	2.26016e-133	3	PB.18330.431(ALDH3A1~NIC)	BC
4.90756e-138	1.42893	0.746	0.45	2.26926e-133	3	PB.62925.58(CRTAC1~NNC)	BC
7.74881e-135	2.34124	0.352	0.1	3.58305e-130	3	PB.18330.430(ALDH3A1~NNC)	BC
4.16921e-130	1.97684	0.397	0.128	1.92784e-125	3	PB.8433.33(ITGA6~NNC)	BC
1.25718e-129	1.19175	0.765	0.405	5.81321e-125	3	PB.26616.12(PTGS2~FSM)	BC
1.41508e-128	1.97822	0.5	0.212	6.54332e-124	3	PB.62488.521(PLAU~NIC)	BC
2.27201e-126	1.06145	0.869	0.655	1.05058e-121	3	PB.58971.48(CLU~NIC)	BC
3.56215e-118	2.54281	0.26	0.058	1.64714e-113	3	PB.63585.1(VIM~NNC)	BC
2.8054e-117	2.21026	0.343	0.108	1.29722e-112	3	PB.18330.437(ALDH3A1~NIC)	BC
6.44616e-116	2.10922	0.406	0.152	2.98071e-111	3	PB.62303.874(SNCG~NNC)	BC
2.86145e-115	1.86621	0.345	0.104	1.32313e-110	3	PB.26594.359(IVNS1ABP~FSM)	BC
1.18853e-114	2.23999	0.296	0.079	5.49577e-110	3	PB.63011.1177(COL17A1~NNC)	BC
1.94567e-113	1.59813	0.506	0.228	8.99678e-109	3	PB.62137.101(ITGB1~NNC)	BC
2.3919e-110	1.0755	0.689	0.347	1.10602e-105	3	PB.48169.1472(MGARP~FSM)	BC
9.79894e-105	2.21644	0.254	0.062	4.53103e-100	3	PB.63585.3(VIM~NNC)	BC
9.71294e-102	2.30179	0.28	0.08	4.49127e-97	3	PB.18330.439(ALDH3A1~NIC)	BC
2.11628e-95	1.96174	0.306	0.096	9.78568e-91	3	PB.29566.375(LAMC2~ISM)	BC
6.46369e-95	1.79628	0.279	0.079	2.98881e-90	3	PB.23097.91(LAMA3~ISM)	BC
1.51016e-90	1.7276	0.307	0.101	6.98299e-86	3	PB.55228.1256(SLC7A8~NNC)	BC
2.3661e-87	1.51619	0.415	0.18	1.09409e-82	3	PB.26594.510(IVNS1ABP~FSM)	BC
1.46929e-83	1.28321	0.527	0.285	6.79399e-79	3	PB.5818.3(HSP90B1~ISM)	BC
1.86371e-83	1.74682	0.312	0.11	8.61779e-79	3	PB.42876.83(MOXD1~FSM)	BC
8.09971e-82	1.93964	0.302	0.109	3.74531e-77	3	PB.18330.461(ALDH3A1~NIC)	BC
4.43908e-79	1.91161	0.298	0.108	2.05263e-74	3	PB.18330.424(ALDH3A1~NNC)	BC
2.28871e-78	1.91686	0.265	0.086	1.0583e-73	3	PB.32507.794(SLC12A4~FSM)	BC
1.46198e-70	1.30614	0.301	0.112	6.76019e-66	3	PB.34376.4(RBP1~ISM)	BC
4.01468e-69	1.45799	0.41	0.199	1.85639e-64	3	PB.26616.225(PTGS2~FSM)	BC
7.88009e-55	1.10125	0.477	0.287	3.64376e-50	3	PB.9438.208(FHL2~NIC)	BC
1.66866e-51	1.41878	0.311	0.149	7.71588e-47	3	PB.40670.6(APP~FSM)	BC
4.98308e-51	1.23122	0.254	0.101	2.30417e-46	3	PB.4040.439(DCN~NNC)	BC
8.04438e-51	1.35182	0.307	0.142	3.71972e-46	3	PB.38762.260(FSCN1~FSM)	BC
2.14308e-50	1.42785	0.343	0.175	9.90959e-46	3	PB.26616.184(PTGS2~FSM)	BC
2.36242e-50	1.35199	0.334	0.168	1.09238e-45	3	PB.40670.7(APP~FSM)	BC
2.78391e-50	1.41509	0.312	0.147	1.28728e-45	3	PB.62488.523(PLAU~FSM)	BC
4.00952e-45	1.11955	0.29	0.134	1.854e-40	3	PB.18840.1371(TNS4~NNC)	BC
5.01292e-44	1.27023	0.35	0.192	2.31797e-39	3	PB.19873.1(TOM1L1~NNC)	BC
8.46403e-33	1.14315	0.339	0.206	3.91377e-28	3	PB.3485.100(SLC38A2~FSM)	BC
1.43361e-32	1.01028	0.345	0.209	6.62903e-28	3	PB.13528.1059(CTSF~NNC)	BC
0	7.47816	0.614	0.004	0	4	PB.62636.24(CDK1~FSM)	TAC
0	7.70291	0.568	0.006	0	4	PB.2499.1(ENSMFAG00000028239~FSM)	TAC
0	6.13259	0.492	0.008	0	4	PB.19228.62(TK1~FSM)	TAC
0	7.76617	0.394	0.003	0	4	PB.18840.803(TOP2A~ISM)	TAC
4.02372e-305	6.31531	0.303	0.003	1.86057e-300	4	PB.2312.914(TPX2~NNC)	TAC
2.03115e-302	6.45797	0.311	0.004	9.39202e-298	4	PB.62636.11(CDK1~FSM)	TAC
3.27637e-288	6.28141	0.348	0.006	1.515e-283	4	PB.10511.59(RRM2~FSM)	TAC
8.06633e-279	5.90994	0.288	0.004	3.72987e-274	4	PB.63322.26(MKI67~ISM)	TAC
2.45594e-276	6.20318	0.318	0.005	1.13562e-271	4	PB.56939.358(CCNB2~FSM)	TAC
7.80762e-255	4.51119	0.447	0.014	3.61024e-250	4	PB.47994.9(ENSMFAG00000043866~FSM)	TAC
4.28439e-254	6.4962	0.25	0.003	1.9811e-249	4	PB.6722.53(SPC25~ISM)	TAC
1.93646e-250	6.10991	0.258	0.003	8.95419e-246	4	PB.55075.65(PRC1~FSM)	TAC
1.09369e-236	5.44079	0.303	0.006	5.05723e-232	4	PB.10511.42(RRM2~ISM)	TAC
4.89767e-218	4.29775	0.848	0.077	2.26468e-213	4	PB.31400.3(STMN1~NNC)	TAC
1.13762e-202	5.58168	0.258	0.005	5.26035e-198	4	PB.20389.344(BIRC5~NIC)	TAC
1.24322e-200	4.4556	0.485	0.023	5.74866e-196	4	PB.45121.1(CENPW~NNC)	TAC
3.68003e-199	5.10112	0.303	0.008	1.70165e-194	4	PB.64215.3(ZWINT~NNC)	TAC
2.02063e-196	4.90961	0.424	0.018	9.34341e-192	4	PB.57951.1(CDKN3~FSM)	TAC
4.08922e-183	4.00934	0.439	0.021	1.89086e-178	4	PB.56735.17(ENSMFAG00000037325~NIC)	TAC
7.37285e-183	5.07385	0.295	0.008	3.40921e-178	4	PB.36972.11(ECT2~NNC)	TAC
3.35886e-173	4.27231	0.432	0.022	1.55314e-168	4	PB.31400.1(STMN1~NNC)	TAC
7.38136e-171	4.07631	0.811	0.094	3.41314e-166	4	PB.48484.23(HMGB2~FSM)	TAC
1.06803e-161	4.0072	0.515	0.035	4.93856e-157	4	PB.23960.2(TYMS~FSM)	TAC
5.80929e-150	3.57284	0.674	0.067	2.68622e-145	4	PB.53933.11(PTTG1~NNC)	TAC
6.64627e-149	4.62313	0.364	0.018	3.07323e-144	4	PB.44282.640(ENSMFAG00000009138~FSM)	TAC
6.86255e-145	4.40648	0.311	0.013	3.17324e-140	4	PB.21895.53(CKAP2~NNC)	TAC
8.79403e-141	4.25837	0.364	0.019	4.06636e-136	4	PB.23960.1(TYMS~FSM)	TAC
3.48783e-120	3.54132	0.523	0.049	1.61277e-115	4	PB.38836.6(MCM7~FSM)	TAC
1.82148e-100	4.10028	0.273	0.015	8.42253e-96	4	PB.53933.10(PTTG1~NNC)	TAC
2.21436e-98	2.8677	0.591	0.074	1.02392e-93	4	PB.12573.42(RRM1~FSM)	TAC
5.58804e-87	3.89961	0.258	0.016	2.58391e-82	4	PB.56735.23(ENSMFAG00000037325~NIC)	TAC
4.43977e-83	2.74441	0.833	0.202	2.05295e-78	4	PB.17824.1(CKS2~FSM)	TAC
6.25021e-82	2.70311	0.576	0.084	2.8901e-77	4	PB.44189.3(ENSMFAG00000003772~FSM)	TAC
5.11676e-76	3.02535	0.409	0.046	2.36599e-71	4	PB.7872.1(DTYMK~FSM)	TAC
5.51417e-72	2.43447	0.977	0.489	2.54975e-67	4	PB.44189.55(ENSMFAG00000003772~FSM)	TAC
5.98831e-64	2.96208	0.576	0.11	2.769e-59	4	PB.20269.1(KPNA2~NNC)	TAC
9.15545e-64	2.72429	0.348	0.039	4.23348e-59	4	PB.66543.1(ENSMFAG00000041871~FSM)	TAC
3.38721e-58	1.6715	1	0.782	1.56625e-53	4	PB.47829.234(H2AZ1~FSM)	TAC
2.75537e-57	2.18335	0.803	0.241	1.27408e-52	4	PB.27336.129(CKS1B~NNC)	TAC
1.55996e-54	1.50434	1	0.808	7.21325e-50	4	PB.3524.1636(TUBA1A~FSM)	TAC
6.17855e-52	1.93305	0.864	0.308	2.85696e-47	4	PB.20551.111(HMGB1~FSM)	TAC
1.14418e-51	2.79243	0.273	0.03	5.29068e-47	4	PB.12573.55(RRM1~FSM)	TAC
4.20553e-51	2.02207	0.856	0.309	1.94464e-46	4	PB.41194.194(H2AZ2~FSM)	TAC
7.97823e-50	2.07633	0.667	0.168	3.68913e-45	4	PB.20551.385(HMGB1~ISM)	TAC
5.30013e-46	1.8681	0.803	0.266	2.45078e-41	4	PB.28663.68(ENSMFAG00000040651~FSM)	TAC
5.76847e-46	2.56638	0.333	0.049	2.66734e-41	4	PB.19314.2(CENPX~FSM)	TAC
2.02994e-40	2.81388	0.288	0.042	9.38643e-36	4	PB.28932.481(CENPS-CORT~FSM)	TAC
1.13619e-39	2.02877	0.538	0.131	5.25375e-35	4	PB.20551.352(HMGB1~FSM)	TAC
9.9158e-39	1.68496	0.606	0.163	4.58507e-34	4	PB.24723.656(PAFAH1B3~FSM)	TAC
4.75235e-37	1.96568	0.659	0.215	2.19749e-32	4	PB.24983.1000(UBE2S~FSM)	TAC
2.67725e-35	1.68559	0.689	0.236	1.23796e-30	4	PB.5573.1(LSM3~FSM)	TAC
2.57049e-34	1.9543	0.417	0.091	1.18859e-29	4	PB.2227.17(PCNA~NNC)	TAC
5.78166e-33	1.61521	0.712	0.259	2.67344e-28	4	PB.20551.211(HMGB1~FSM)	TAC
3.28408e-32	2.12224	0.583	0.191	1.51856e-27	4	PB.32050.287(ENSMFAG00000042475~FSM)	TAC
4.111e-32	1.45871	0.765	0.29	1.90093e-27	4	PB.457.1(RANBP1~NNC)	TAC
1.23357e-30	1.70463	0.659	0.248	5.70403e-26	4	PB.9143.821(ENSMFAG00000031087~FSM)	TAC
3.07288e-28	2.14428	0.25	0.043	1.4209e-23	4	PB.14166.1(CAVIN3~FSM)	TAC
7.07386e-27	1.63109	0.273	0.051	3.27095e-22	4	PB.41983.2(CAV1~ISM)	TAC
1.28168e-26	1.43938	0.5	0.147	5.92647e-22	4	PB.20551.296(HMGB1~FSM)	TAC
3.41369e-26	1.60602	0.439	0.119	1.57849e-21	4	PB.27335.831(ENSMFAG00000003238~NIC)	TAC
8.51418e-26	1.50572	0.538	0.173	3.93696e-21	4	PB.46251.1(LSM2~FSM)	TAC
4.15123e-25	1.69513	0.333	0.078	1.91953e-20	4	PB.2568.270(CSE1L~FSM)	TAC
1.50287e-24	2.01128	0.303	0.068	6.94926e-20	4	PB.33465.2(CKLF~FSM)	TAC
1.85305e-24	1.13904	0.894	0.482	8.56849e-20	4	PB.41407.8(HNRNPA2B1~NIC)	TAC
1.90066e-24	1.95152	0.288	0.062	8.78867e-20	4	PB.2227.23(PCNA~NNC)	TAC
2.32359e-24	1.18277	0.795	0.374	1.07443e-19	4	PB.9143.85(ENSMFAG00000031087~FSM)	TAC
4.24718e-24	1.1346	0.803	0.373	1.9639e-19	4	PB.27317.2476(LMNA~NNC)	TAC
7.99899e-24	1.20685	0.78	0.381	3.69873e-19	4	PB.5190.231(TUBA1C~FSM)	TAC
1.08932e-23	1.50678	0.348	0.088	5.03702e-19	4	PB.63585.3(VIM~NNC)	TAC
1.98616e-23	1.17596	0.75	0.331	9.18399e-19	4	PB.9143.1(ENSMFAG00000031087~NNC)	TAC
4.30089e-23	1.34716	0.674	0.286	1.98873e-18	4	PB.43337.11(DYNLT1~FSM)	TAC
8.41654e-23	2.07014	0.265	0.057	3.89181e-18	4	PB.32050.344(ENSMFAG00000042475~FSM)	TAC
1.03351e-22	1.50806	0.364	0.094	4.77895e-18	4	PB.24789.77(TRAPPC6A~FSM)	TAC
4.30278e-22	1.55654	0.333	0.086	1.9896e-17	4	PB.63585.1(VIM~NNC)	TAC
5.1073e-22	1.5961	0.258	0.054	2.36162e-17	4	PB.9143.24(ENSMFAG00000031087~FSM)	TAC
5.59045e-22	1.1898	0.523	0.17	2.58502e-17	4	PB.12482.72(WEE1~FSM)	TAC
6.52435e-22	1.04667	0.568	0.198	3.01686e-17	4	PB.13192.505(H2AX~FSM)	TAC
2.74179e-21	1.57177	0.386	0.112	1.2678e-16	4	PB.41339.52(ENSMFAG00000038508~NNC)	TAC
4.23008e-21	1.1748	0.742	0.346	1.95599e-16	4	PB.1439.66(PSMA7~FSM)	TAC
4.25437e-21	1.41312	0.47	0.156	1.96722e-16	4	PB.15693.239(ANP32B~FSM)	TAC
1.34566e-20	1.81341	0.28	0.067	6.22232e-16	4	PB.64864.2(PTMS~NNC)	TAC
2.08189e-20	1.19614	0.712	0.318	9.62667e-16	4	PB.24366.584(ENSMFAG00000031194~FSM)	TAC
3.55886e-20	1.29846	0.826	0.534	1.64562e-15	4	PB.18860.6034(KRT14~FSM)	TAC
4.4357e-20	1.02248	0.788	0.387	2.05107e-15	4	PB.2267.50(SNRPB~FSM)	TAC
4.8247e-20	1.80367	0.303	0.079	2.23094e-15	4	PB.31357.4(RPA2~FSM)	TAC
5.39663e-20	1.59934	0.333	0.09	2.4954e-15	4	PB.10912.754(BOLA3~FSM)	TAC
8.17354e-20	1.44078	0.402	0.125	3.77945e-15	4	PB.53973.7(ENSMFAG00000043579~NNC)	TAC
1.21052e-19	1.62213	0.28	0.068	5.59744e-15	4	PB.3589.38(ENSMFAG00000006585~FSM)	TAC
3.30755e-19	1.68021	0.318	0.087	1.52941e-14	4	PB.41586.9(ENSMFAG00000042056~FSM)	TAC
3.67123e-19	1.40888	0.341	0.096	1.69758e-14	4	PB.39282.8(ENSMFAG00000000399~FSM)	TAC
4.1067e-19	1.37064	0.439	0.147	1.89894e-14	4	PB.20551.47(HMGB1~FSM)	TAC
5.32785e-19	1.6459	0.273	0.067	2.4636e-14	4	PB.457.62(RANBP1~NNC)	TAC
6.11933e-19	1.22969	0.591	0.244	2.82958e-14	4	PB.59860.5(RAD21~FSM)	TAC
1.22883e-18	1.20953	0.417	0.137	5.6821e-14	4	PB.34376.4(RBP1~ISM)	TAC
1.67833e-18	1.31167	0.477	0.169	7.76061e-14	4	PB.41586.10(ENSMFAG00000042056~FSM)	TAC
2.60773e-18	1.28934	0.386	0.119	1.20581e-13	4	PB.24367.982(CRLF1~NNC)	TAC
3.42856e-18	1.42306	0.462	0.168	1.58536e-13	4	PB.32824.1(APRT~FSM)	TAC
3.45105e-18	1.76755	0.265	0.066	1.59576e-13	4	PB.39282.48(ENSMFAG00000000399~FSM)	TAC
7.32807e-18	1.07836	0.379	0.117	3.3885e-13	4	PB.12100.666(MDK~FSM)	TAC
1.15563e-17	1.75829	0.288	0.078	5.34364e-13	4	PB.44140.21(PSMB9~FSM)	TAC
1.86726e-17	1.00506	0.674	0.308	8.63421e-13	4	PB.62115.378(KIF5B~ISM)	TAC
4.71441e-17	1.51652	0.258	0.065	2.17994e-12	4	PB.58593.1(SIVA1~FSM)	TAC
7.02622e-17	1.36755	0.288	0.078	3.24893e-12	4	PB.24310.80(DDX39A~NNC)	TAC
7.70656e-17	1.18248	0.356	0.111	3.56351e-12	4	PB.32206.55(DCTPP1~FSM)	TAC
1.53011e-16	1.1102	0.333	0.102	7.07522e-12	4	PB.181.1(ENSMFAG00000036985~FSM)	TAC
4.15423e-16	1.35247	0.258	0.067	1.92091e-11	4	PB.55874.118(ENSMFAG00000003078~FSM)	TAC
7.37668e-16	1.23141	0.364	0.117	3.41098e-11	4	PB.13663.678(MTCH2~FSM)	TAC
1.13589e-15	1.42334	0.341	0.11	5.25237e-11	4	PB.46444.6(ENSMFAG00000043279~FSM)	TAC
1.3439e-15	1.28233	0.333	0.105	6.21421e-11	4	PB.44065.1116(SRSF3~FSM)	TAC
1.47077e-15	1.01827	0.621	0.284	6.80082e-11	4	PB.33333.99(ENSMFAG00000032548~FSM)	TAC
1.74602e-15	1.11167	0.356	0.114	8.07362e-11	4	PB.28373.1099(YBX1~NNC)	TAC
2.00813e-15	1.14477	0.348	0.11	9.28561e-11	4	PB.24367.985(CRLF1~NNC)	TAC
6.82001e-15	1.14593	0.447	0.173	3.15357e-10	4	PB.6168.1(RAN~NNC)	TAC
3.24752e-14	1.04613	0.417	0.155	1.50165e-09	4	PB.31479.476(HNRNPR~NNC)	TAC
1.17715e-13	1.23553	0.364	0.132	5.44316e-09	4	PB.59860.143(RAD21~ISM)	TAC
1.35425e-13	1.27026	0.364	0.133	6.26207e-09	4	PB.60621.151(EIF4EBP1~FSM)	TAC
1.95378e-13	1.30896	0.379	0.141	9.03426e-09	4	PB.24588.83(POLR2I~FSM)	TAC
3.93639e-13	1.30874	0.311	0.106	1.82019e-08	4	PB.13650.2(SSRP1~FSM)	TAC
1.04531e-12	1.14768	0.371	0.139	4.83349e-08	4	PB.57193.25(COMMD4~FSM)	TAC
1.33446e-12	1.07437	0.311	0.105	6.17053e-08	4	PB.42578.124(ENSMFAG00000035657~FSM)	TAC
2.64881e-12	1.01489	0.409	0.164	1.22481e-07	4	PB.57233.1(RCN2~FSM)	TAC
8.7921e-12	1.39036	0.258	0.085	4.06547e-07	4	PB.16765.1075(ZDHHC12~FSM)	TAC
2.43945e-11	1.00862	0.25	0.08	1.128e-06	4	PB.28696.431(SRRM1~ISM)	TAC
3.18571e-11	1.09857	0.326	0.122	1.47307e-06	4	PB.52475.5(CCT5~FSM)	TAC
8.0219e-11	1.04044	0.341	0.132	3.70933e-06	4	PB.55190.397(SNRPA1~FSM)	TAC
1.25109e-10	1.19571	0.25	0.084	5.78506e-06	4	PB.35236.28(TKT~NNC)	TAC
1.38653e-10	1.25277	0.273	0.098	6.41132e-06	4	PB.62988.34(ARL3~FSM)	TAC
3.32448e-10	1.1428	0.265	0.094	1.53724e-05	4	PB.41208.1(POLD2~FSM)	TAC
4.45783e-10	1.10157	0.303	0.118	2.0613e-05	4	PB.18074.25(SLC25A11~FSM)	TAC
4.49052e-10	1.21977	0.265	0.097	2.07642e-05	4	PB.41990.14(LSM8~FSM)	TAC
5.45246e-09	1.05589	0.318	0.135	0.000252122	4	PB.65533.17(AKR1A1~NIC)	TAC
1.82256e-08	1.16702	0.273	0.109	0.000842752	4	PB.61727.54(IDI1~FSM)	TAC
7.09472e-08	1.0184	0.265	0.111	0.0032806	4	PB.2267.3(SNRPB~NNC)	TAC
4.76308e-07	1.00968	0.25	0.106	0.0220245	4	PB.49679.519(MCUB~FSM)	TAC
