# Supplementary material for: Long-read single-cell RNA sequencing analysis of key genes and isoforms during corneal wound healing in cynomolgus monkeys
Source: Research Square preprint supplement (doi:10.21203/rs.3.rs-5232061/v1), 2025-03-05
Supplement: Supplementary file 13 [file Supplementary Data3_DEGs for each cell type in different time.xlsx]

## Sheet: Sheet1
p_val	avg_log2FC	pct.1	pct.2	p_val_adj	stim	celltype	gene_id	trend
4.28e-304	2.5399	0.989	0.961	6.08e-300	1/0d	TDCE	SFN	up
1.47e-300	3.88751	0.962	0.31	2.08e-296	1/0d	TDCE	CTSL	up
7.18e-282	4.02697	0.946	0.269	1.02e-277	1/0d	TDCE	KRT6A	up
2.94e-276	3.47647	0.942	0.336	4.17e-272	1/0d	TDCE	SERPINB1	up
7.04e-269	3.89396	0.973	0.37	9.99e-265	1/0d	TDCE	APOBEC3A	up
4.79e-226	1.37373	0.996	0.989	6.8e-222	1/0d	TDCE	ACTG1	up
8.63e-197	2.27214	0.799	0.172	1.22e-192	1/0d	TDCE	ENSMFAG00000045648	up
6.23e-183	1.76889	0.914	0.599	8.84e-179	1/0d	TDCE	SERPINB5	up
3.46e-178	1.97426	0.866	0.448	4.91e-174	1/0d	TDCE	PTP4A1	up
1.09e-167	1.21789	0.953	0.888	1.55e-163	1/0d	TDCE	EIF4A1	up
6.5e-155	2.37585	0.601	0.031	9.22e-151	1/0d	TDCE	CYP26B1	up
1.69e-154	1.72685	0.959	0.645	2.4e-150	1/0d	TDCE	PTGS2	up
6.66e-151	1.79104	0.905	0.542	9.44e-147	1/0d	TDCE	ENSMFAG00000044185	up
1.79e-146	1.95221	0.653	0.107	2.53e-142	1/0d	TDCE	ISG20	up
2.96e-142	1.3801	0.92	0.787	4.2e-138	1/0d	TDCE	ENSMFAG00000001552	up
6.54e-132	1.22105	0.936	0.778	9.27e-128	1/0d	TDCE	CLDN7	up
3.15e-128	1.66801	0.853	0.58	4.47e-124	1/0d	TDCE	GJB4	up
1.45e-116	1.72514	0.597	0.122	2.06e-112	1/0d	TDCE	UGCG	up
5.46e-115	1.58112	0.739	0.336	7.75e-111	1/0d	TDCE	TMPRSS11D	up
7.92e-115	1.36897	0.822	0.507	1.12e-110	1/0d	TDCE	TUBA1C	up
7.44e-114	1.73284	0.678	0.235	1.06e-109	1/0d	TDCE	ENSMFAG00000000419	up
1.07e-112	1.14582	0.938	0.833	1.51e-108	1/0d	TDCE	TUBB2A	up
5.37e-104	1.10781	0.929	0.851	7.61e-100	1/0d	TDCE	TMSB10	up
2.4e-91	1.76367	0.444	0.049	3.41e-87	1/0d	TDCE	MUC22	up
6.65e-88	1.38565	0.792	0.376	9.44e-84	1/0d	TDCE	KRT24	up
3.36e-87	1.32038	0.843	0.612	4.76e-83	1/0d	TDCE	PHLDA2	up
8.3e-85	1.09369	0.824	0.577	1.18e-80	1/0d	TDCE	ATF4	up
2.62e-82	1.34211	0.572	0.191	3.71e-78	1/0d	TDCE	IL6ST	up
2.76e-82	1.46372	0.717	0.377	3.91e-78	1/0d	TDCE	ITGA2	up
4.21e-80	2.46445	0.454	0.082	5.98e-76	1/0d	TDCE	SERPINB2	up
4.85e-79	1.3882	0.495	0.114	6.88e-75	1/0d	TDCE	GEM	up
5.16e-79	1.41331	0.949	0.949	7.32e-75	1/0d	TDCE	CSTB	up
1.09e-75	1.23409	0.65	0.31	1.55e-71	1/0d	TDCE	ST14	up
2.09e-73	1.24423	0.549	0.202	2.97e-69	1/0d	TDCE	IL4R	up
2.49e-68	1.48423	0.604	0.288	3.54e-64	1/0d	TDCE	THBS1	up
1.35e-67	1.3544	0.502	0.167	1.91e-63	1/0d	TDCE	MXD1	up
3.53e-65	1.11922	0.769	0.514	5e-61	1/0d	TDCE	DSG3	up
1.47e-63	1.13809	0.583	0.233	2.09e-59	1/0d	TDCE	RNF213	up
9.49e-62	1.15332	0.529	0.214	1.35e-57	1/0d	TDCE	BCL10	up
3.13e-61	1.09341	0.833	0.663	4.43e-57	1/0d	TDCE	ENSMFAG00000044835	up
9.3e-61	1.17012	0.525	0.211	1.32e-56	1/0d	TDCE	MAP4K4	up
7.36e-60	1.01511	0.738	0.526	1.04e-55	1/0d	TDCE	MAST4	up
6.27e-57	1.07226	0.629	0.348	8.9e-53	1/0d	TDCE	FHL2	up
7.48e-57	1.11681	0.486	0.184	1.06e-52	1/0d	TDCE	RBM47	up
9.1e-57	1.53258	0.651	0.368	1.29e-52	1/0d	TDCE	ENSMFAG00000000085	up
1.15e-54	1.01816	0.562	0.267	1.63e-50	1/0d	TDCE	PSMD12	up
4.45e-54	1.01996	0.629	0.363	6.31e-50	1/0d	TDCE	DNAJA2	up
1.17e-53	1.70924	0.313	0.045	1.65e-49	1/0d	TDCE	KRT23	up
3.88e-53	1.46623	0.501	0.218	5.51e-49	1/0d	TDCE	PLAU	up
3.39e-52	1.082	0.318	0.052	4.81e-48	1/0d	TDCE	ENSMFAG00000027255	up
3.94e-51	1.05269	0.588	0.329	5.59e-47	1/0d	TDCE	STK17A	up
8.5e-51	1.0414	0.592	0.334	1.21e-46	1/0d	TDCE	IFNGR1	up
1.22e-50	1.02525	0.227	0.002	1.72e-46	1/0d	TDCE	S100A9	up
5.25e-48	1.26182	0.529	0.253	7.45e-44	1/0d	TDCE	HBEGF	up
5.02e-46	1.00753	0.342	0.084	7.11e-42	1/0d	TDCE	PHLDB2	up
1.35e-45	1.01641	0.544	0.282	1.91e-41	1/0d	TDCE	B4GALT5	up
2.18e-40	1.09474	0.422	0.166	3.09e-36	1/0d	TDCE	ENSMFAG00000040595	up
5.09e-39	1.00288	0.37	0.127	7.22e-35	1/0d	TDCE	ENSMFAG00000000927	up
9.74e-36	1.74757	0.203	0.021	1.38e-31	1/0d	TDCE	HMOX1	up
7.79e-33	1.00849	0.316	0.105	1.11e-28	1/0d	TDCE	S100A2	up
9.15e-24	1.42525	0.21	0.059	1.3e-19	1/0d	TDCE	KRT27	up
1.78e-18	1.01565	0.203	0.073	2.53e-14	1/0d	TDCE	FABP3	up
4.84e-253	5.90349	0.891	0.126	6.87e-249	3/1d	TDCE	KRT14	up
1.18e-249	5.89522	0.781	0.025	1.68e-245	3/1d	TDCE	KRT16	up
1.32e-249	3.67314	0.939	0.263	1.88e-245	3/1d	TDCE	LY6D	up
5.3e-245	3.82929	0.911	0.181	7.51e-241	3/1d	TDCE	IFI27	up
2.38e-238	2.60404	0.9	0.169	3.38e-234	3/1d	TDCE	CSTA	up
2.88e-238	3.21022	0.912	0.196	4.08e-234	3/1d	TDCE	ENSMFAG00000037676	up
1.75e-237	2.00501	0.993	0.92	2.48e-233	3/1d	TDCE	ENSMFAG00000001552	up
1.26e-222	2.34973	0.984	0.574	1.79e-218	3/1d	TDCE	ENSMFAG00000000455	up
5.98e-217	2.18897	0.975	0.63	8.48e-213	3/1d	TDCE	S100A16	up
3.01e-210	1.86658	0.984	0.667	4.26e-206	3/1d	TDCE	DYNLL1	up
2.47e-209	2.13109	0.993	0.946	3.5e-205	3/1d	TDCE	KRT6A	up
4.2e-209	3.01597	0.75	0.064	5.96e-205	3/1d	TDCE	IFI6	up
1.19e-206	2.08522	0.941	0.3	1.69e-202	3/1d	TDCE	CTSD	up
8.8e-203	3.87118	0.631	0	1.25e-198	3/1d	TDCE	SPINK5	up
1.35e-197	1.38115	0.99	0.993	1.91e-193	3/1d	TDCE	KRT5	up
3.93e-197	1.95641	0.98	0.628	5.57e-193	3/1d	TDCE	ENSMFAG00000039068	up
7.21e-179	1.36889	1	0.877	1.02e-174	3/1d	TDCE	B2M	up
1.68e-159	1.82027	0.945	0.558	2.38e-155	3/1d	TDCE	LYNX1-SLURP2	up
1.63e-154	1.23359	0.989	0.929	2.31e-150	3/1d	TDCE	TMSB10	up
5.93e-153	1.89059	0.567	0.029	8.41e-149	3/1d	TDCE	DDX60	up
7.29e-141	1.18739	0.982	0.853	1.03e-136	3/1d	TDCE	S100A14	up
1.28e-140	1.69646	0.675	0.114	1.81e-136	3/1d	TDCE	ECM1	up
7.84e-140	1.45264	0.902	0.454	1.11e-135	3/1d	TDCE	RAB25	up
8.97e-136	2.73629	0.59	0.06	1.27e-131	3/1d	TDCE	KRT17	up
1.11e-122	1.6473	0.636	0.119	1.57e-118	3/1d	TDCE	ENSMFAG00000041011	up
5.68e-121	1.46528	0.815	0.289	8.06e-117	3/1d	TDCE	TUBA4A	up
1.66e-117	1.28457	0.823	0.304	2.35e-113	3/1d	TDCE	COX8A	up
2.5e-112	1.78334	0.775	0.326	3.55e-108	3/1d	TDCE	NDUFA4L2	up
6.96e-106	1.18185	0.856	0.369	9.87e-102	3/1d	TDCE	EVPL	up
1.32e-105	1.39574	0.563	0.092	1.87e-101	3/1d	TDCE	ENSMFAG00000033629	up
1.33e-99	3.73729	0.529	0.095	1.88e-95	3/1d	TDCE	ENSMFAG00000032417	up
1.7e-97	1.03257	0.372	0.011	2.41e-93	3/1d	TDCE	NCCRP1	up
9.86e-95	1.01521	0.338	0.003	1.4e-90	3/1d	TDCE	ADAP2	up
1.75e-93	2.01512	0.489	0.077	2.48e-89	3/1d	TDCE	PLAC8	up
7.52e-90	1.12749	0.959	0.718	1.07e-85	3/1d	TDCE	UPK1B	up
8.01e-89	1.17868	0.557	0.119	1.14e-84	3/1d	TDCE	CLIC3	up
1.17e-87	1.67244	0.571	0.136	1.65e-83	3/1d	TDCE	IGFBP2	up
4.22e-87	1.08882	0.837	0.4	5.99e-83	3/1d	TDCE	PRDX6	up
2.74e-86	1.53547	0.632	0.206	3.89e-82	3/1d	TDCE	DCN	up
1.53e-85	1.04273	0.994	0.949	2.17e-81	3/1d	TDCE	CSTB	up
8.66e-81	1.0732	0.492	0.093	1.23e-76	3/1d	TDCE	TYMP	up
7.09e-73	1.34378	0.297	0.014	1.01e-68	3/1d	TDCE	DHRS9	up
9.5e-72	1.00397	0.75	0.334	1.35e-67	3/1d	TDCE	DBI	up
1.02e-66	4.14888	0.586	0.227	1.45e-62	3/1d	TDCE	S100A9	up
1.17e-66	1.02839	0.569	0.172	1.67e-62	3/1d	TDCE	LGALSL	up
3.23e-66	1.20801	0.257	0.007	4.58e-62	3/1d	TDCE	FAM3D	up
6.35e-64	1.85199	0.242	0.004	9.01e-60	3/1d	TDCE	KRT78	up
2.04e-61	1.03899	0.757	0.391	2.89e-57	3/1d	TDCE	ENSMFAG00000003238	up
6.67e-61	1.37865	0.368	0.067	9.46e-57	3/1d	TDCE	LYZ	up
1.1e-58	1.29702	0.351	0.06	1.56e-54	3/1d	TDCE	ENSMFAG00000001311	up
1.64e-52	1.26053	0.576	0.227	2.32e-48	3/1d	TDCE	ENSMFAG00000041417	up
1.41e-50	1.19223	0.495	0.18	2e-46	3/1d	TDCE	ENSMFAG00000035657	up
1.12e-45	1.48237	0.441	0.155	1.58e-41	3/1d	TDCE	CST6	up
4.84e-43	1.12372	0.242	0.033	6.86e-39	3/1d	TDCE	ISG15	up
5.94e-41	1.39241	0.543	0.264	8.43e-37	3/1d	TDCE	LY6G6C	up
1.68e-39	3.48925	0.27	0.057	2.38e-35	3/1d	TDCE	KRT19	up
8.54e-39	1.59484	0.586	0.316	1.21e-34	3/1d	TDCE	S100A2	up
2.26e-27	1.36667	0.184	0.035	3.2e-23	3/1d	TDCE	KRT4	up
1.42e-19	1.21489	0.717	0.543	2.02e-15	3/1d	TDCE	HOPX	up
2.35e-19	1.57399	0.107	0.014	3.34e-15	3/1d	TDCE	S100P	up
2.03e-13	1.52524	0.296	0.151	2.87e-09	3/1d	TDCE	PLAAT2	up
1.03e-271	6.15806	0.993	0.269	1.46e-267	3/0d	TDCE	KRT6A	up
3.78e-257	4.09516	0.912	0.058	5.36e-253	3/0d	TDCE	ENSMFAG00000037676	up
3.41e-249	4.3125	0.939	0.141	4.84e-245	3/0d	TDCE	LY6D	up
1.03e-248	3.38511	0.993	0.787	1.46e-244	3/0d	TDCE	ENSMFAG00000001552	up
5.63e-241	3.13116	0.975	0.378	7.98e-237	3/0d	TDCE	S100A16	up
3.82e-229	6.73428	0.891	0.116	5.42e-225	3/0d	TDCE	KRT14	up
9.35e-227	2.3414	0.989	0.851	1.33e-222	3/0d	TDCE	TMSB10	up
4.32e-218	6.19709	0.781	0.004	6.13e-214	3/0d	TDCE	KRT16	up
1.11e-215	3.83124	0.911	0.163	1.57e-211	3/0d	TDCE	IFI27	up
2.31e-214	2.45604	0.994	0.949	3.27e-210	3/0d	TDCE	CSTB	up
1.29e-212	1.23365	1	0.999	1.84e-208	3/0d	TDCE	S100A6	up
3.46e-198	1.91821	0.984	0.709	4.91e-194	3/0d	TDCE	DYNLL1	up
6.03e-181	1.6605	0.982	0.846	8.55e-177	3/0d	TDCE	S100A14	up
6.51e-166	1.40969	1	0.901	9.23e-162	3/0d	TDCE	B2M	up
2.05e-162	3.84204	0.631	0.007	2.91e-158	3/0d	TDCE	SPINK5	up
6.17e-155	1.21895	0.996	0.961	8.76e-151	3/0d	TDCE	SFN	up
6.36e-154	1.28949	0.992	0.96	9.02e-150	3/0d	TDCE	ENSMFAG00000037514	up
5.35e-151	1.99043	0.9	0.407	7.58e-147	3/0d	TDCE	CSTA	up
6.53e-150	1.00585	0.99	0.998	9.26e-146	3/0d	TDCE	KRT5	up
3.02e-149	5.17413	0.586	0.002	4.28e-145	3/0d	TDCE	S100A9	up
1.36e-145	2.28709	0.87	0.336	1.93e-141	3/0d	TDCE	SERPINB1	up
1.1e-137	3.28732	0.59	0.025	1.56e-133	3/0d	TDCE	KRT17	up
3.37e-135	1.85967	0.675	0.09	4.78e-131	3/0d	TDCE	ECM1	up
4.46e-134	1.70277	0.945	0.603	6.32e-130	3/0d	TDCE	LYNX1-SLURP2	up
1.03e-129	1.93198	0.567	0.027	1.46e-125	3/0d	TDCE	DDX60	up
1.84e-126	2.52567	0.75	0.2	2.61e-122	3/0d	TDCE	IFI6	up
2.7e-121	2.03561	0.631	0.082	3.84e-117	3/0d	TDCE	SERPINB2	up
1.11e-120	1.70452	0.563	0.039	1.57e-116	3/0d	TDCE	ENSMFAG00000033629	up
3.04e-119	1.39992	0.902	0.508	4.31e-115	3/0d	TDCE	RAB25	up
4.8e-118	1.07997	0.972	0.846	6.8e-114	3/0d	TDCE	ENSMFAG00000029971	up
3.69e-116	2.05102	0.9	0.376	5.23e-112	3/0d	TDCE	KRT24	up
1.22e-115	1.82163	0.636	0.11	1.72e-111	3/0d	TDCE	ENSMFAG00000041011	up
2.9e-115	1.5768	0.881	0.368	4.11e-111	3/0d	TDCE	ENSMFAG00000000085	up
2.96e-111	1.33806	0.932	0.514	4.19e-107	3/0d	TDCE	DSG3	up
3.21e-111	1.4207	0.959	0.691	4.55e-107	3/0d	TDCE	UPK1B	up
3.05e-107	1.01754	0.967	0.844	4.32e-103	3/0d	TDCE	ENSMFAG00000032199	up
3.71e-106	1.27465	0.984	0.645	5.27e-102	3/0d	TDCE	PTGS2	up
2.78e-105	1.22763	0.984	0.917	3.95e-101	3/0d	TDCE	ENSMFAG00000000455	up
1.1e-102	1.23746	0.925	0.599	1.55e-98	3/0d	TDCE	SERPINB5	up
1.01e-101	2.60333	0.586	0.105	1.43e-97	3/0d	TDCE	S100A2	up
1.9e-99	1.31288	0.844	0.434	2.7e-95	3/0d	TDCE	CARHSP1	up
1.09e-96	1.55785	0.793	0.31	1.55e-92	3/0d	TDCE	CTSL	up
2.13e-96	1.02487	0.975	0.798	3.02e-92	3/0d	TDCE	TXNDC17	up
4.93e-96	1.3061	0.492	0.042	6.99e-92	3/0d	TDCE	TYMP	up
7.4e-94	1.19771	0.918	0.648	1.05e-89	3/0d	TDCE	PKP1	up
2.15e-84	1.25721	0.785	0.375	3.06e-80	3/0d	TDCE	CTNNBIP1	up
9.22e-84	1.17574	0.837	0.43	1.31e-79	3/0d	TDCE	PRDX6	up
7.25e-83	1.1345	0.941	0.668	1.03e-78	3/0d	TDCE	CTSD	up
3.26e-81	1.32281	0.557	0.114	4.63e-77	3/0d	TDCE	GEM	up
5.5e-80	1.0467	0.372	0.011	7.81e-76	3/0d	TDCE	NCCRP1	up
2.74e-78	1.04204	0.338	0	3.88e-74	3/0d	TDCE	ADAP2	up
8.1e-76	2.5715	0.796	0.37	1.15e-71	3/0d	TDCE	APOBEC3A	up
6.89e-69	1.11205	0.597	0.18	9.77e-65	3/0d	TDCE	HSPH1	up
4.24e-66	1.02351	0.953	0.814	6.01e-62	3/0d	TDCE	S100A10	up
4.62e-61	1.46332	0.576	0.189	6.56e-57	3/0d	TDCE	ENSMFAG00000041417	up
4.83e-61	1.36016	0.297	0.011	6.84e-57	3/0d	TDCE	DHRS9	up
3.47e-55	1.23838	0.246	0	4.92e-51	3/0d	TDCE	S100A8	up
5.69e-54	1.05967	0.757	0.414	8.07e-50	3/0d	TDCE	ENSMFAG00000003238	up
5.87e-54	1.29815	0.571	0.218	8.32e-50	3/0d	TDCE	PLAU	up
2.58e-52	1.14622	0.345	0.053	3.66e-48	3/0d	TDCE	PI3	up
1.07e-49	1.52602	0.489	0.153	1.52e-45	3/0d	TDCE	PLAC8	up
7.41e-49	1.13768	0.775	0.505	1.05e-44	3/0d	TDCE	NDUFA4L2	up
2.65e-47	1.25297	0.496	0.173	3.76e-43	3/0d	TDCE	ENSMFAG00000037584	up
3.86e-46	1.11079	0.492	0.166	5.48e-42	3/0d	TDCE	ENSMFAG00000040595	up
4.94e-46	1.77195	0.242	0.013	7.01e-42	3/0d	TDCE	KRT78	up
1.98e-45	1.21489	0.327	0.059	2.81e-41	3/0d	TDCE	KRT27	up
3.88e-42	1.13475	0.632	0.329	5.5e-38	3/0d	TDCE	DCN	up
7.84e-35	1.42904	0.543	0.285	1.11e-30	3/0d	TDCE	LY6G6C	up
1.14e-33	1.10965	0.495	0.24	1.62e-29	3/0d	TDCE	ENSMFAG00000035657	up
1.54e-26	1.95382	0.296	0.091	2.19e-22	3/0d	TDCE	PLAAT2	up
1.85e-14	1.54703	0.107	0.018	2.62e-10	3/0d	TDCE	S100P	up
4.68e-12	1.10868	0.717	0.621	6.64e-08	3/0d	TDCE	HOPX	up
1.06e-251	4.5987	0.964	0.402	1.51e-247	1/0d	LSC	MT3	up
2.09e-242	3.30972	0.948	0.313	2.97e-238	1/0d	LSC	ITGA2	up
3.28e-242	3.75735	0.876	0.135	4.65e-238	1/0d	LSC	CTSL	up
4.14e-240	3.13842	0.948	0.387	5.87e-236	1/0d	LSC	ENSMFAG00000001552	up
9.17e-218	2.38117	0.966	0.613	1.3e-213	1/0d	LSC	S100A10	up
1.58e-216	3.0869	0.738	0.029	2.24e-212	1/0d	LSC	ENSMFAG00000045648	up
5.94e-213	2.50177	0.966	0.708	8.43e-209	1/0d	LSC	SFN	up
3.16e-207	3.90231	0.929	0.495	4.48e-203	1/0d	LSC	S100A2	up
3.18e-200	3.2168	0.764	0.097	4.51e-196	1/0d	LSC	ENSMFAG00000000419	up
3.08e-187	2.53807	0.878	0.293	4.36e-183	1/0d	LSC	TUBA1C	up
5.32e-176	1.53655	0.969	0.846	7.54e-172	1/0d	LSC	ENSMFAG00000037514	up
6.67e-173	3.12518	0.732	0.12	9.46e-169	1/0d	LSC	SERPINB1	up
2.33e-171	1.86613	0.927	0.61	3.31e-167	1/0d	LSC	EIF4A1	up
2.06e-167	2.68667	0.66	0.053	2.92e-163	1/0d	LSC	MAP4K4	up
5.8e-160	3.57112	0.557	0.009	8.23e-156	1/0d	LSC	APOBEC3A	up
1.7e-148	3.50869	0.576	0.039	2.41e-144	1/0d	LSC	KRT6A	up
6.54e-139	1.30995	0.953	0.845	9.27e-135	1/0d	LSC	ANXA2	up
1.19e-135	2.50774	0.539	0.034	1.69e-131	1/0d	LSC	PHLDA2	up
3.58e-133	3.3709	0.72	0.177	5.07e-129	1/0d	LSC	MMP1	up
3.3e-128	2.13299	0.722	0.196	4.69e-124	1/0d	LSC	SERPINB5	up
9.6e-121	2.02957	0.719	0.211	1.36e-116	1/0d	LSC	TOP1	up
3.48e-118	1.93138	0.767	0.299	4.94e-114	1/0d	LSC	S100A16	up
2.47e-115	2.46277	0.472	0.028	3.5e-111	1/0d	LSC	ENSMFAG00000044185	up
2.54e-107	1.38584	0.894	0.67	3.6e-103	1/0d	LSC	ENSMFAG00000043579	up
2.79e-107	1.8861	0.698	0.216	3.95e-103	1/0d	LSC	PFN1	up
3.53e-105	1.87174	0.391	0.005	5e-101	1/0d	LSC	CPM	up
5e-100	1.62329	0.891	0.571	7.09e-96	1/0d	LSC	TMSB10	up
5.97e-100	1.80739	0.805	0.376	8.47e-96	1/0d	LSC	ENSMFAG00000000085	up
3.8e-96	1.74133	0.491	0.064	5.4e-92	1/0d	LSC	DDX21	up
1.9e-94	1.68303	0.934	0.789	2.7e-90	1/0d	LSC	ANXA1	up
4.94e-91	1.78187	0.526	0.093	7.01e-87	1/0d	LSC	FHL2	up
7.71e-91	1.2361	0.955	0.873	1.09e-86	1/0d	LSC	ACTG1	up
8.08e-89	1.673	0.469	0.067	1.15e-84	1/0d	LSC	ENSMFAG00000044001	up
2.34e-88	1.239	0.886	0.586	3.32e-84	1/0d	LSC	YBX3	up
3.11e-88	1.95746	0.478	0.073	4.42e-84	1/0d	LSC	GJB4	up
2.44e-85	1.50604	0.8	0.433	3.46e-81	1/0d	LSC	NCL	up
8.11e-85	1.64753	0.643	0.198	1.15e-80	1/0d	LSC	MACF1	up
1.02e-83	1.44335	0.748	0.351	1.44e-79	1/0d	LSC	RAN	up
4.14e-82	1.68664	0.468	0.079	5.87e-78	1/0d	LSC	TUBB6	up
1.36e-80	1.48615	0.723	0.311	1.93e-76	1/0d	LSC	SLC25A5	up
2.44e-80	1.74354	0.437	0.062	3.46e-76	1/0d	LSC	FOSL1	up
3.03e-80	1.65951	0.38	0.033	4.3e-76	1/0d	LSC	EFHD2	up
1.06e-78	1.5873	0.354	0.025	1.51e-74	1/0d	LSC	FSCN1	up
1.14e-77	1.64792	0.369	0.033	1.62e-73	1/0d	LSC	VEGFA	up
2.32e-77	2.25759	0.324	0.015	3.29e-73	1/0d	LSC	MMP10	up
2.8e-75	1.92242	0.356	0.031	3.97e-71	1/0d	LSC	ENSMFAG00000041970	up
5.51e-74	1.59617	0.378	0.042	7.81e-70	1/0d	LSC	IL4R	up
8.01e-74	1.73827	0.388	0.049	1.14e-69	1/0d	LSC	GJB2	up
9.88e-74	1.51866	0.539	0.138	1.4e-69	1/0d	LSC	ARPC5L	up
1.8e-73	1.71124	0.318	0.017	2.56e-69	1/0d	LSC	ISG20	up
1.39e-72	1.52155	0.42	0.064	1.98e-68	1/0d	LSC	ZYX	up
6.63e-71	1.21066	0.803	0.514	9.4e-67	1/0d	LSC	YBX1	up
2.84e-70	1.54562	0.397	0.057	4.02e-66	1/0d	LSC	UGCG	up
8.97e-70	1.45695	0.675	0.294	1.27e-65	1/0d	LSC	ANXA5	up
9.92e-70	1.65355	0.536	0.153	1.41e-65	1/0d	LSC	LAMA3	up
2.15e-69	1.52876	0.434	0.08	3.04e-65	1/0d	LSC	SEMA4B	up
2.4e-68	1.49745	0.474	0.106	3.4e-64	1/0d	LSC	ENSMFAG00000000379	up
1.2e-66	1.00889	0.886	0.624	1.71e-62	1/0d	LSC	GAPDH	up
1.39e-65	1.43379	0.401	0.069	1.97e-61	1/0d	LSC	MSN	up
1.61e-65	1.44146	0.519	0.148	2.28e-61	1/0d	LSC	GNL3	up
3.62e-65	1.32028	0.608	0.215	5.13e-61	1/0d	LSC	HNRNPAB	up
4.07e-65	1.97126	0.404	0.075	5.77e-61	1/0d	LSC	LAMC2	up
5.92e-65	1.2777	0.767	0.398	8.4e-61	1/0d	LSC	EZR	up
8.35e-65	1.43383	0.338	0.038	1.18e-60	1/0d	LSC	RPL36	up
1.77e-64	1.3704	0.448	0.096	2.5e-60	1/0d	LSC	FAM89A	up
2.01e-64	1.38513	0.493	0.125	2.85e-60	1/0d	LSC	ENSMFAG00000038518	up
3.06e-64	1.54834	0.28	0.015	4.34e-60	1/0d	LSC	EHD4	up
2.51e-63	1.32528	0.337	0.039	3.57e-59	1/0d	LSC	ENSMFAG00000003974	up
1.19e-62	1.44644	0.587	0.209	1.68e-58	1/0d	LSC	PTP4A1	up
3.19e-62	1.17207	0.81	0.511	4.52e-58	1/0d	LSC	SH3BGRL3	up
6.66e-62	2.80296	0.239	0.003	9.45e-58	1/0d	LSC	S100A9	up
9.36e-62	1.29684	0.641	0.268	1.33e-57	1/0d	LSC	ENSMFAG00000045023	up
9.39e-62	1.32757	0.519	0.151	1.33e-57	1/0d	LSC	HYPK	up
1.16e-60	1.28573	0.724	0.39	1.65e-56	1/0d	LSC	HSP90B1	up
1.85e-60	1.14445	0.764	0.416	2.62e-56	1/0d	LSC	ATF4	up
3.09e-59	1.32924	0.488	0.135	4.38e-55	1/0d	LSC	SNRPD1	up
5.5e-59	1.33387	0.408	0.084	7.8e-55	1/0d	LSC	WDR43	up
1.09e-58	1.30336	0.329	0.042	1.54e-54	1/0d	LSC	LYAR	up
1.55e-57	1.15652	0.662	0.275	2.19e-53	1/0d	LSC	ETS2	up
3.19e-57	1.26459	0.62	0.258	4.53e-53	1/0d	LSC	CYCS	up
1.11e-56	1.6204	0.398	0.089	1.58e-52	1/0d	LSC	PLAT	up
2.95e-56	1.26392	0.238	0.009	4.19e-52	1/0d	LSC	MDFI	up
6.37e-56	1.3373	0.315	0.043	9.03e-52	1/0d	LSC	RRP9	up
6.37e-56	1.52584	0.472	0.141	9.04e-52	1/0d	LSC	NDRG1	up
6.64e-56	1.31674	0.345	0.057	9.41e-52	1/0d	LSC	NOP16	up
1.22e-54	1.43653	0.582	0.221	1.74e-50	1/0d	LSC	AREG	up
2.25e-54	1.81499	0.506	0.181	3.2e-50	1/0d	LSC	SOD2	up
1.02e-53	1.29348	0.366	0.071	1.45e-49	1/0d	LSC	GTPBP4	up
1.75e-53	1.27366	0.612	0.262	2.48e-49	1/0d	LSC	PGAM1	up
1.04e-52	1.25613	0.3	0.039	1.47e-48	1/0d	LSC	TPM4	up
2.12e-52	1.29236	0.296	0.038	3e-48	1/0d	LSC	MTHFD2	up
2.62e-52	1.23981	0.38	0.082	3.72e-48	1/0d	LSC	GRPEL1	up
3.5e-52	1.12108	0.79	0.503	4.96e-48	1/0d	LSC	TNS4	up
1.2e-51	1.33191	0.28	0.033	1.7e-47	1/0d	LSC	SLC38A1	up
1.55e-51	1.04282	0.732	0.407	2.19e-47	1/0d	LSC	HNRNPDL	up
1.62e-51	1.14526	0.714	0.372	2.3e-47	1/0d	LSC	CAST	up
6.31e-51	1.23438	0.382	0.087	8.95e-47	1/0d	LSC	HIF1A	up
1.23e-50	1.17544	0.605	0.259	1.75e-46	1/0d	LSC	BZW1	up
1.31e-50	1.00319	0.777	0.521	1.86e-46	1/0d	LSC	ENSMFAG00000041919	up
5.33e-50	1.22196	0.2	0.004	7.56e-46	1/0d	LSC	SH2D5	up
1.18e-49	1.37987	0.638	0.34	1.67e-45	1/0d	LSC	ENSMFAG00000040595	up
1.46e-49	1.18712	0.596	0.261	2.06e-45	1/0d	LSC	SNU13	up
1.93e-49	1.18594	0.535	0.201	2.73e-45	1/0d	LSC	PA2G4	up
2.3e-49	1.04567	0.208	0.007	3.26e-45	1/0d	LSC	PITPNC1	up
4.4e-49	1.17366	0.254	0.026	6.24e-45	1/0d	LSC	LAD1	up
4.84e-49	1.19887	0.471	0.15	6.87e-45	1/0d	LSC	NOP56	up
4.89e-49	1.30186	0.446	0.138	6.94e-45	1/0d	LSC	EPHA2	up
6.56e-49	1.27081	0.506	0.18	9.3e-45	1/0d	LSC	LGALS3	up
7.5e-49	1.19996	0.313	0.053	1.06e-44	1/0d	LSC	RCL1	up
1.13e-48	1.27708	0.382	0.093	1.61e-44	1/0d	LSC	MAP2K3	up
1.69e-48	1.13841	0.203	0.006	2.4e-44	1/0d	LSC	EGLN3	up
1.86e-48	1.34359	0.324	0.06	2.64e-44	1/0d	LSC	SDC4	up
3.66e-48	1.22257	0.417	0.113	5.19e-44	1/0d	LSC	STK17A	up
5.66e-48	1.20163	0.28	0.039	8.02e-44	1/0d	LSC	LRRC8A	up
9.21e-48	1.13422	0.617	0.279	1.31e-43	1/0d	LSC	ZFAND5	up
2.01e-47	1.16954	0.312	0.055	2.85e-43	1/0d	LSC	TRAF4	up
7.08e-47	1.21616	0.433	0.132	1e-42	1/0d	LSC	TOMM5	up
2.76e-46	1.09007	0.392	0.098	3.91e-42	1/0d	LSC	NIFK	up
6.68e-46	1.11795	0.213	0.014	9.48e-42	1/0d	LSC	HK2	up
7.68e-46	1.17334	0.424	0.121	1.09e-41	1/0d	LSC	ARHGDIA	up
1.89e-45	1.12771	0.235	0.023	2.68e-41	1/0d	LSC	CXCL16	up
2.81e-45	1.27939	0.443	0.144	3.99e-41	1/0d	LSC	DSG3	up
1.07e-44	1.15772	0.735	0.468	1.51e-40	1/0d	LSC	NET1	up
1.14e-44	1.05761	0.628	0.313	1.61e-40	1/0d	LSC	SNRPB	up
3.35e-44	1.09358	0.251	0.031	4.75e-40	1/0d	LSC	ENSMFAG00000014991	up
8.79e-44	1.45281	0.29	0.053	1.25e-39	1/0d	LSC	PLAU	up
1.03e-43	1.0889	0.519	0.195	1.46e-39	1/0d	LSC	ENSMFAG00000036355	up
1.18e-43	1.18751	0.255	0.035	1.68e-39	1/0d	LSC	RBMS1	up
1.69e-43	1.12731	0.526	0.213	2.39e-39	1/0d	LSC	CCT2	up
1.85e-43	1.14184	0.214	0.017	2.62e-39	1/0d	LSC	SIPA1L2	up
2.52e-43	1.25974	0.42	0.135	3.57e-39	1/0d	LSC	PYGL	up
7.77e-43	1.16396	0.434	0.142	1.1e-38	1/0d	LSC	VMP1	up
9.56e-43	1.18055	0.213	0.018	1.36e-38	1/0d	LSC	SLC4A7	up
1.04e-42	1.05957	0.389	0.106	1.47e-38	1/0d	LSC	MRPL14	up
1.37e-42	1.12962	0.426	0.138	1.94e-38	1/0d	LSC	PDCD5	up
2.55e-42	1.13677	0.315	0.067	3.62e-38	1/0d	LSC	CAPN2	up
3.21e-42	1.10951	0.325	0.072	4.55e-38	1/0d	LSC	TNIP2	up
5.12e-42	1.06491	0.64	0.344	7.27e-38	1/0d	LSC	ENSMFAG00000032317	up
5.13e-42	1.11775	0.222	0.023	7.27e-38	1/0d	LSC	RAB31	up
1.68e-41	1.07746	0.229	0.027	2.38e-37	1/0d	LSC	ENSMFAG00000031996	up
1.92e-41	1.22051	0.173	0.005	2.72e-37	1/0d	LSC	PHLDB2	up
2.3e-41	1.07943	0.179	0.007	3.26e-37	1/0d	LSC	CELF2	up
2.5e-41	1.12873	0.459	0.164	3.55e-37	1/0d	LSC	RAP1B	up
3.32e-41	1.19015	0.233	0.029	4.7e-37	1/0d	LSC	EXT1	up
3.85e-41	1.07386	0.837	0.664	5.46e-37	1/0d	LSC	LMNA	up
6.33e-41	1.22975	0.399	0.125	8.98e-37	1/0d	LSC	TNFRSF1A	up
1.09e-40	1.08256	0.208	0.019	1.54e-36	1/0d	LSC	SLC1A5	up
1.65e-40	1.22494	0.385	0.119	2.34e-36	1/0d	LSC	TSC22D2	up
2.51e-40	1.05924	0.382	0.112	3.57e-36	1/0d	LSC	JPT1	up
2.79e-40	1.03152	0.241	0.034	3.95e-36	1/0d	LSC	FBLIM1	up
4.48e-40	1.12188	0.217	0.024	6.36e-36	1/0d	LSC	NIPAL1	up
5.46e-40	1.29352	0.308	0.071	7.75e-36	1/0d	LSC	HBEGF	up
6.58e-40	1.04649	0.299	0.063	9.33e-36	1/0d	LSC	UCHL3	up
6.72e-40	1.15507	0.43	0.148	9.52e-36	1/0d	LSC	NOP58	up
7.76e-40	1.14733	0.421	0.137	1.1e-35	1/0d	LSC	DUSP6	up
9.17e-40	1.09979	0.411	0.132	1.3e-35	1/0d	LSC	MET	up
1.59e-39	1.06433	0.418	0.137	2.25e-35	1/0d	LSC	BAZ1A	up
1.68e-39	2.80228	0.484	0.216	2.38e-35	1/0d	LSC	TIMP1	up
2.66e-39	1.36428	0.207	0.022	3.77e-35	1/0d	LSC	PLAUR	up
1.35e-38	1.01059	0.251	0.042	1.91e-34	1/0d	LSC	LRRC59	up
1.38e-38	1.03861	0.433	0.147	1.96e-34	1/0d	LSC	ITGB1	up
1.54e-38	1.11869	0.414	0.138	2.18e-34	1/0d	LSC	PFDN2	up
1.71e-38	1.15073	0.315	0.076	2.43e-34	1/0d	LSC	LASP1	up
3.06e-38	1.10265	0.19	0.016	4.34e-34	1/0d	LSC	GEM	up
4.03e-38	1.04958	0.499	0.208	5.72e-34	1/0d	LSC	RBM8A	up
5.17e-38	1.15723	0.3	0.07	7.34e-34	1/0d	LSC	ENSMFAG00000003078	up
6.06e-38	1.10434	0.219	0.028	8.59e-34	1/0d	LSC	SLC7A1	up
9.78e-38	1.01719	0.261	0.049	1.39e-33	1/0d	LSC	RUFY3	up
1.8e-37	1.01182	0.303	0.07	2.56e-33	1/0d	LSC	ABCE1	up
2.73e-37	1.10098	0.246	0.041	3.87e-33	1/0d	LSC	TXNRD1	up
2.8e-37	1.05221	0.411	0.144	3.96e-33	1/0d	LSC	GSPT1	up
2.87e-37	1.02346	0.445	0.165	4.06e-33	1/0d	LSC	BAG1	up
5.11e-37	1.03344	0.321	0.082	7.25e-33	1/0d	LSC	WDR1	up
1.13e-36	1.06243	0.236	0.038	1.61e-32	1/0d	LSC	TRIB1	up
1.57e-36	1.03572	0.485	0.197	2.23e-32	1/0d	LSC	MAST4	up
1.78e-36	1.13643	0.534	0.247	2.52e-32	1/0d	LSC	TGIF1	up
2.44e-36	1.03513	0.334	0.093	3.46e-32	1/0d	LSC	EBNA1BP2	up
3.9e-36	1.02527	0.28	0.062	5.53e-32	1/0d	LSC	NOLC1	up
1.18e-35	1.40944	0.257	0.051	1.67e-31	1/0d	LSC	VMO1	up
2.13e-35	1.01691	0.378	0.124	3.03e-31	1/0d	LSC	RAB5IF	up
3.36e-35	1.22663	0.239	0.044	4.76e-31	1/0d	LSC	ENSMFAG00000043037	up
5.68e-35	1.47241	0.172	0.014	8.06e-31	1/0d	LSC	FST	up
5.83e-35	1.01707	0.666	0.405	8.27e-31	1/0d	LSC	PRDX5	up
1.42e-34	1.09701	0.286	0.07	2.01e-30	1/0d	LSC	SPAG9	up
2.41e-34	1.08245	0.551	0.28	3.42e-30	1/0d	LSC	S100A14	up
3.15e-34	1.09014	0.362	0.116	4.47e-30	1/0d	LSC	FAM110C	up
4.31e-34	1.18445	0.331	0.099	6.11e-30	1/0d	LSC	ITGA3	up
5.71e-34	1.71122	0.143	0.005	8.1e-30	1/0d	LSC	S100A8	up
6.13e-34	1.04548	0.569	0.284	8.69e-30	1/0d	LSC	TACSTD2	up
1.48e-33	1.08429	0.21	0.033	2.1e-29	1/0d	LSC	AGFG1	up
3.27e-33	1.10685	0.337	0.105	4.64e-29	1/0d	LSC	CDCP1	up
4.12e-33	1.2794	0.433	0.182	5.84e-29	1/0d	LSC	TRIM28	up
5.49e-33	1.03937	0.283	0.072	7.79e-29	1/0d	LSC	TLCD2	up
9.88e-33	1.01147	0.335	0.103	1.4e-28	1/0d	LSC	NAA15	up
1.52e-31	1.61228	0.12	0	2.16e-27	1/0d	LSC	PI3	up
1.92e-31	1.03897	0.325	0.102	2.72e-27	1/0d	LSC	ETV3	up
1.24e-28	1.03904	0.229	0.054	1.76e-24	1/0d	LSC	MTSS1	up
1.67e-28	1.4159	0.137	0.01	2.37e-24	1/0d	LSC	HMOX1	up
1.08e-27	1.02421	0.111	0.002	1.54e-23	1/0d	LSC	SERPINB2	up
5.87e-27	1.24186	0.242	0.066	8.32e-23	1/0d	LSC	KRT16	up
1.93e-22	1.03625	0.585	0.359	2.73e-18	1/0d	LSC	S100A4	up
2.59e-178	4.04183	0.882	0	3.67e-174	3/1d	LSC	RBP1	up
9.7e-155	3.7896	0.885	0.057	1.38e-150	3/1d	LSC	TPM1	up
1.28e-132	3.13187	0.769	0.028	1.82e-128	3/1d	LSC	VIM	up
5.69e-130	3.19357	0.713	0.013	8.07e-126	3/1d	LSC	KRT7	up
7.88e-121	3.11288	0.813	0.102	1.12e-116	3/1d	LSC	SPARC	up
3.12e-115	2.93128	0.732	0.052	4.42e-111	3/1d	LSC	CSTA	up
7.39e-114	2.43596	0.738	0.054	1.05e-109	3/1d	LSC	CALD1	up
1.82e-113	2.28444	0.991	0.875	2.58e-109	3/1d	LSC	KRT14	up
1.46e-108	2.72375	0.614	0.009	2.06e-104	3/1d	LSC	ANGPTL7	up
1.83e-104	5.25957	0.57	0	2.59e-100	3/1d	LSC	FN1	up
1.11e-101	2.86962	0.682	0.057	1.57e-97	3/1d	LSC	ENSMFAG00000036985	up
2.41e-100	1.53691	0.997	0.891	3.41e-96	3/1d	LSC	TMSB10	up
5.44e-99	2.62762	0.879	0.226	7.72e-95	3/1d	LSC	KRT17	up
1.44e-98	2.49552	0.826	0.194	2.04e-94	3/1d	LSC	TKT	up
2.22e-97	2.09968	0.95	0.401	3.14e-93	3/1d	LSC	HSPB1	up
1.27e-95	2.27943	0.688	0.066	1.8e-91	3/1d	LSC	COL7A1	up
2.05e-87	3.31876	0.745	0.159	2.91e-83	3/1d	LSC	CXCL14	up
4.08e-87	1.55004	0.994	0.934	5.79e-83	3/1d	LSC	KRT5	up
7.85e-86	1.92561	0.894	0.35	1.11e-81	3/1d	LSC	TXNDC17	up
7.56e-82	1.87665	0.85	0.257	1.07e-77	3/1d	LSC	NDUFA4L2	up
1.25e-79	1.84825	0.558	0.039	1.77e-75	3/1d	LSC	TNFSF10	up
1.4e-79	1.96469	0.773	0.157	1.99e-75	3/1d	LSC	ATF3	up
1.45e-78	2.09715	0.551	0.039	2.05e-74	3/1d	LSC	ATP1B1	up
6.5e-74	1.66541	0.947	0.573	9.22e-70	3/1d	LSC	DSP	up
4.54e-73	2.31331	0.455	0.012	6.44e-69	3/1d	LSC	TAGLN	up
6.3e-73	1.73703	0.794	0.248	8.93e-69	3/1d	LSC	ARPC1B	up
6.12e-71	2.02688	0.464	0.02	8.68e-67	3/1d	LSC	MDK	up
1.43e-70	1.57145	0.667	0.115	2.02e-66	3/1d	LSC	CAPG	up
5.5e-70	2.10264	0.816	0.28	7.79e-66	3/1d	LSC	ENSMFAG00000039068	up
7.59e-70	2.21462	0.857	0.362	1.08e-65	3/1d	LSC	ENSMFAG00000000455	up
5.04e-69	1.58339	0.863	0.359	7.15e-65	3/1d	LSC	DYNLL1	up
2.79e-67	2.45032	0.607	0.106	3.96e-63	3/1d	LSC	PTN	up
7.25e-66	1.75998	0.467	0.031	1.03e-61	3/1d	LSC	TPM2	up
8.19e-66	1.9063	0.417	0.013	1.16e-61	3/1d	LSC	CYP1B1	up
2.34e-64	1.39203	0.545	0.063	3.32e-60	3/1d	LSC	CLCA2	up
5.87e-63	1.62664	0.713	0.188	8.32e-59	3/1d	LSC	GPX4	up
2.73e-62	1.91627	0.819	0.268	3.87e-58	3/1d	LSC	CTSD	up
5.26e-62	1.81677	0.598	0.108	7.47e-58	3/1d	LSC	TGM2	up
7.25e-62	1.1924	0.966	0.717	1.03e-57	3/1d	LSC	MYL12A	up
3.91e-61	1.56545	0.726	0.191	5.54e-57	3/1d	LSC	DST	up
2.36e-58	1.32123	0.393	0.016	3.34e-54	3/1d	LSC	CTSH	up
2.26e-57	1.42434	0.567	0.095	3.2e-53	3/1d	LSC	SRI	up
3.49e-56	1.35843	0.424	0.032	4.95e-52	3/1d	LSC	CAV2	up
5.37e-56	2.203	0.844	0.491	7.62e-52	3/1d	LSC	KRT19	up
1.47e-55	1.34816	0.458	0.05	2.08e-51	3/1d	LSC	IDH2	up
2.76e-55	1.36452	0.779	0.274	3.91e-51	3/1d	LSC	DSTN	up
5.28e-55	1.5423	0.321	0	7.49e-51	3/1d	LSC	MMP2	up
9.69e-55	1.43344	0.71	0.192	1.37e-50	3/1d	LSC	FLNA	up
7.29e-54	2.43102	0.315	0	1.03e-49	3/1d	LSC	COL1A1	up
1.34e-52	1.21787	0.938	0.601	1.9e-48	3/1d	LSC	ENSMFAG00000031476	up
1.63e-52	1.24118	0.498	0.071	2.31e-48	3/1d	LSC	STMP1	up
5.8e-52	1.34316	0.349	0.013	8.22e-48	3/1d	LSC	CA2	up
6.42e-51	1.25713	0.364	0.02	9.1e-47	3/1d	LSC	SULF2	up
7.25e-51	1.74146	0.941	0.585	1.03e-46	3/1d	LSC	S100A4	up
9.55e-50	1.62311	0.34	0.015	1.35e-45	3/1d	LSC	TNC	up
1.07e-49	2.31273	0.897	0.576	1.51e-45	3/1d	LSC	KRT6A	up
2.68e-49	3.44762	0.707	0.242	3.8e-45	3/1d	LSC	KRT16	up
4.6e-49	1.3043	0.34	0.016	6.53e-45	3/1d	LSC	COL5A2	up
6.36e-49	1.29017	0.324	0.01	9.03e-45	3/1d	LSC	CAV1	up
7.09e-49	1.17677	0.445	0.058	1.01e-44	3/1d	LSC	AP1S1	up
7.59e-49	1.27643	0.604	0.143	1.08e-44	3/1d	LSC	GLO1	up
3.79e-48	1.23317	0.545	0.106	5.37e-44	3/1d	LSC	DBI	up
2.88e-47	1.60626	0.791	0.353	4.08e-43	3/1d	LSC	ITGB4	up
4.88e-47	1.49011	0.417	0.05	6.91e-43	3/1d	LSC	PALLD	up
6.65e-47	1.16891	0.436	0.055	9.43e-43	3/1d	LSC	BNIP3	up
1.04e-46	1.16109	0.835	0.391	1.48e-42	3/1d	LSC	ATP5F1E	up
3.55e-46	1.18612	0.657	0.187	5.04e-42	3/1d	LSC	ATOX1	up
6.15e-46	1.15363	0.38	0.036	8.72e-42	3/1d	LSC	LIMK2	up
8.88e-46	1.10877	0.318	0.015	1.26e-41	3/1d	LSC	TOM1L1	up
6.51e-45	1.25792	0.477	0.086	9.23e-41	3/1d	LSC	CA12	up
2.39e-44	1.07442	0.897	0.542	3.39e-40	3/1d	LSC	ARPC2	up
5.82e-44	1.02932	0.308	0.015	8.25e-40	3/1d	LSC	CAVIN3	up
7.12e-44	1.16928	0.29	0.009	1.01e-39	3/1d	LSC	MMP14	up
1.15e-43	1.16461	0.277	0.006	1.63e-39	3/1d	LSC	TMEM255B	up
1.38e-43	1.23302	0.402	0.052	1.96e-39	3/1d	LSC	MARCKS	up
2.72e-43	1.18613	0.346	0.029	3.85e-39	3/1d	LSC	COL18A1	up
4.11e-43	1.68163	0.265	0.003	5.83e-39	3/1d	LSC	LY6D	up
5.07e-43	1.13344	0.53	0.117	7.19e-39	3/1d	LSC	GSN	up
1.16e-41	1.03917	0.555	0.13	1.64e-37	3/1d	LSC	TAX1BP3	up
5.75e-41	1.11499	0.411	0.063	8.16e-37	3/1d	LSC	PYCARD	up
5.97e-41	1.19192	0.402	0.058	8.47e-37	3/1d	LSC	SLC38A5	up
6.77e-41	1.33353	0.502	0.111	9.61e-37	3/1d	LSC	ITGAV	up
7.84e-41	1.93464	0.43	0.085	1.11e-36	3/1d	LSC	FBLN2	up
1.42e-40	1.00672	0.368	0.042	2.02e-36	3/1d	LSC	RRAS	up
2.64e-40	1.12277	0.654	0.217	3.75e-36	3/1d	LSC	ETFB	up
4.68e-40	1.16494	0.318	0.025	6.64e-36	3/1d	LSC	ANKRD37	up
1.8e-39	1.1113	0.636	0.197	2.55e-35	3/1d	LSC	UQCRC1	up
3.64e-39	1.98084	0.514	0.141	5.17e-35	3/1d	LSC	APOE	up
4.67e-39	1.18054	0.396	0.063	6.62e-35	3/1d	LSC	ENSMFAG00000003238	up
1.19e-38	1.03086	0.763	0.297	1.69e-34	3/1d	LSC	PSAP	up
1.58e-38	1.07338	0.464	0.098	2.23e-34	3/1d	LSC	DYNLT1	up
4.76e-38	1.44295	0.302	0.025	6.76e-34	3/1d	LSC	CCN1	up
1.24e-37	1.09785	0.408	0.069	1.76e-33	3/1d	LSC	FXYD5	up
1.93e-37	1.15457	0.717	0.31	2.74e-33	3/1d	LSC	IGFBP7	up
5.87e-37	1.30111	0.863	0.555	8.33e-33	3/1d	LSC	TGFBI	up
1.07e-36	1.06044	0.536	0.144	1.51e-32	3/1d	LSC	PGLS	up
1.33e-36	1.1484	0.29	0.023	1.89e-32	3/1d	LSC	MFAP2	up
1.44e-36	1.02531	0.486	0.112	2.05e-32	3/1d	LSC	DSC2	up
3.14e-36	1.06262	0.617	0.206	4.46e-32	3/1d	LSC	ATP5IF1	up
5.26e-36	1.04225	0.259	0.013	7.46e-32	3/1d	LSC	SEMA3C	up
1.55e-35	1.01329	0.402	0.071	2.2e-31	3/1d	LSC	PAFAH1B3	up
2.06e-35	1.0264	0.299	0.029	2.91e-31	3/1d	LSC	LGR4	up
3.18e-35	1.24411	0.402	0.077	4.51e-31	3/1d	LSC	ENSMFAG00000041011	up
1.27e-34	1.21468	0.349	0.054	1.8e-30	3/1d	LSC	LAMB1	up
4.46e-34	1.44329	0.202	0	6.33e-30	3/1d	LSC	MMP13	up
3.1e-33	1.26121	0.243	0.013	4.4e-29	3/1d	LSC	CCN2	up
1.7e-31	1.2111	0.371	0.076	2.42e-27	3/1d	LSC	HTRA1	up
3.87e-31	1.02051	0.717	0.297	5.48e-27	3/1d	LSC	APP	up
5.51e-30	1.06086	0.234	0.017	7.82e-26	3/1d	LSC	CPA4	up
5.44e-29	2.68101	0.776	0.415	7.71e-25	3/1d	LSC	ENSMFAG00000043424	up
2.84e-28	1.07973	0.798	0.478	4.03e-24	3/1d	LSC	PERP	up
1.1e-27	1.47616	0.352	0.079	1.56e-23	3/1d	LSC	PTGS2	up
3.7e-25	1.75671	0.405	0.127	5.25e-21	3/1d	LSC	ENSMFAG00000037676	up
3.66e-24	1.18817	0.143	0	5.19e-20	3/1d	LSC	COMP	up
1.39e-19	1.10325	0.115	0	1.97e-15	3/1d	LSC	SPINK5	up
5.45e-19	1.00166	0.583	0.299	7.73e-15	3/1d	LSC	ALDH1A1	up
1.51e-16	1.07388	0.212	0.044	2.13e-12	3/1d	LSC	KRT3	up
2.77e-11	1.11095	0.894	0.837	3.93e-07	3/1d	LSC	ALDH3A1	up
4.31e-259	4.04183	0.882	0	6.11e-255	3/0d	LSC	RBP1	up
1.05e-233	5.82142	0.897	0.039	1.48e-229	3/0d	LSC	KRT6A	up
3.83e-200	3.53596	0.769	0.017	5.43e-196	3/0d	LSC	VIM	up
1.03e-199	3.26296	0.713	0.002	1.46e-195	3/0d	LSC	KRT7	up
7.19e-165	3.16021	0.997	0.571	1.02e-160	3/0d	LSC	TMSB10	up
1.8e-161	2.47927	0.598	0.003	2.55e-157	3/0d	LSC	TGM2	up
2.56e-156	5.25957	0.57	0	3.63e-152	3/0d	LSC	FN1	up
4.71e-149	2.67973	0.701	0.049	6.68e-145	3/0d	LSC	GJB2	up
3.24e-146	2.46948	0.894	0.181	4.6e-142	3/0d	LSC	TXNDC17	up
1.15e-142	2.33875	0.981	0.613	1.64e-138	3/0d	LSC	S100A10	up
4.31e-140	2.51675	0.614	0.026	6.11e-136	3/0d	LSC	ANGPTL7	up
3.74e-139	4.68948	0.707	0.066	5.3e-135	3/0d	LSC	KRT16	up
4.04e-139	2.85604	0.813	0.135	5.73e-135	3/0d	LSC	SPARC	up
9.96e-137	2.91504	0.969	0.495	1.41e-132	3/0d	LSC	S100A2	up
6.61e-135	2.75544	0.732	0.084	9.38e-131	3/0d	LSC	CSTA	up
2.75e-134	2.52908	0.879	0.166	3.9e-130	3/0d	LSC	KRT17	up
6.94e-134	1.70487	0.994	0.846	9.85e-130	3/0d	LSC	ENSMFAG00000037514	up
1.44e-128	1.81288	0.997	0.873	2.05e-124	3/0d	LSC	ACTG1	up
1.61e-128	2.49547	0.701	0.075	2.28e-124	3/0d	LSC	LAMC2	up
7.56e-124	2.80761	0.885	0.238	1.07e-119	3/0d	LSC	TPM1	up
2.19e-121	2.61464	0.682	0.077	3.1e-117	3/0d	LSC	ENSMFAG00000036985	up
9.58e-120	2.09947	0.991	0.877	1.36e-115	3/0d	LSC	KRT14	up
1.02e-119	1.46865	0.997	0.845	1.44e-115	3/0d	LSC	ANXA2	up
1.31e-117	2.04593	0.794	0.152	1.86e-113	3/0d	LSC	ARPC1B	up
5.7e-115	1.74644	0.439	0.002	8.09e-111	3/0d	LSC	ITGB6	up
4.31e-113	2.72478	0.455	0.007	6.11e-109	3/0d	LSC	TAGLN	up
1.08e-112	1.76974	0.542	0.029	1.53e-108	3/0d	LSC	ENSMFAG00000045648	up
4.58e-109	1.52332	0.545	0.033	6.5e-105	3/0d	LSC	CLCA2	up
9.29e-109	2.77771	0.941	0.359	1.32e-104	3/0d	LSC	S100A4	up
1.48e-103	1.21758	1	0.98	2.11e-99	3/0d	LSC	S100A6	up
3.89e-102	1.69242	0.682	0.093	5.51e-98	3/0d	LSC	FHL2	up
8.37e-102	2.58599	0.405	0.005	1.19e-97	3/0d	LSC	ENSMFAG00000037676	up
2.98e-100	1.89343	0.738	0.131	4.22e-96	3/0d	LSC	CALD1	up
3.06e-97	1.59272	0.399	0.006	4.34e-93	3/0d	LSC	EGLN3	up
1.34e-96	2.66981	0.897	0.387	1.9e-92	3/0d	LSC	ENSMFAG00000001552	up
3.56e-94	1.89781	0.738	0.147	5.05e-90	3/0d	LSC	ITGB1	up
1.2e-92	1.35349	0.393	0.008	1.7e-88	3/0d	LSC	CTSH	up
8.39e-92	1.64232	0.872	0.262	1.19e-87	3/0d	LSC	PGAM1	up
1.21e-91	1.44713	0.349	0	1.71e-87	3/0d	LSC	CA2	up
3.59e-91	1.32499	0.452	0.025	5.09e-87	3/0d	LSC	FSCN1	up
1.12e-89	2.43575	0.607	0.098	1.58e-85	3/0d	LSC	PTN	up
4.39e-89	1.59751	0.651	0.104	6.23e-85	3/0d	LSC	ENSMFAG00000020774	up
4.73e-89	1.88319	0.34	0	6.71e-85	3/0d	LSC	TNC	up
8.61e-89	1.50329	0.62	0.087	1.22e-84	3/0d	LSC	HIF1A	up
3.26e-87	1.72085	0.76	0.18	4.63e-83	3/0d	LSC	LGALS3	up
2.03e-86	1.74721	0.514	0.053	2.88e-82	3/0d	LSC	PLAU	up
2.46e-86	1.92925	0.86	0.299	3.49e-82	3/0d	LSC	S100A16	up
3.33e-85	1.88206	0.464	0.038	4.73e-81	3/0d	LSC	MDK	up
5.41e-85	1.57359	0.393	0.016	7.68e-81	3/0d	LSC	GEM	up
6.76e-84	1.5423	0.321	0	9.59e-80	3/0d	LSC	MMP2	up
3.56e-83	1.86007	0.551	0.073	5.05e-79	3/0d	LSC	ATP1B1	up
1.17e-82	1.32746	0.96	0.624	1.66e-78	3/0d	LSC	GAPDH	up
1.76e-82	1.5097	0.779	0.192	2.5e-78	3/0d	LSC	DSTN	up
1.95e-82	1.54351	0.626	0.104	2.76e-78	3/0d	LSC	ENSMFAG00000031981	up
2.23e-82	1.77211	0.417	0.027	3.17e-78	3/0d	LSC	CYP1B1	up
2.61e-80	1.14996	1	0.914	3.7e-76	3/0d	LSC	ENSMFAG00000043121	up
1.44e-79	2.76752	0.318	0.003	2.05e-75	3/0d	LSC	S100A9	up
3.33e-79	1.51387	0.704	0.159	4.73e-75	3/0d	LSC	ENSMFAG00000028668	up
2.91e-76	1.3464	0.346	0.012	4.12e-72	3/0d	LSC	PMEPA1	up
3.34e-75	1.58559	0.71	0.166	4.73e-71	3/0d	LSC	FLNA	up
4.32e-75	1.72637	0.91	0.412	6.13e-71	3/0d	LSC	CSTB	up
5.53e-75	1.61841	0.891	0.372	7.84e-71	3/0d	LSC	CAST	up
5.59e-74	1.33932	0.436	0.04	7.93e-70	3/0d	LSC	CLIC4	up
3.65e-73	1.58787	0.857	0.34	5.17e-69	3/0d	LSC	ENSMFAG00000040595	up
7.17e-73	1.56259	0.417	0.037	1.02e-68	3/0d	LSC	PALLD	up
1.25e-72	1.51418	0.732	0.196	1.77e-68	3/0d	LSC	SERPINB5	up
5.37e-71	1.19366	0.427	0.039	7.62e-67	3/0d	LSC	TPM4	up
1.29e-70	1.58683	0.688	0.168	1.83e-66	3/0d	LSC	COL7A1	up
3.29e-70	1.35994	0.773	0.216	4.67e-66	3/0d	LSC	PFN1	up
3.9e-70	1.78457	0.785	0.28	5.53e-66	3/0d	LSC	S100A14	up
4.64e-70	1.36369	0.835	0.288	6.58e-66	3/0d	LSC	ATP5F1E	up
5.95e-70	1.43974	0.863	0.363	8.45e-66	3/0d	LSC	DYNLL1	up
9.48e-70	1.67251	0.826	0.336	1.34e-65	3/0d	LSC	TKT	up
1.88e-69	2.25585	0.315	0.011	2.66e-65	3/0d	LSC	COL1A1	up
3.16e-69	1.1934	0.966	0.683	4.48e-65	3/0d	LSC	MYL12A	up
1.58e-68	1.99275	0.43	0.05	2.24e-64	3/0d	LSC	FBLN2	up
5.12e-67	1.08037	0.308	0.011	7.25e-63	3/0d	LSC	ECM1	up
8.03e-66	1.154	0.486	0.067	1.14e-61	3/0d	LSC	CAPN2	up
1.44e-65	1.31419	0.402	0.039	2.04e-61	3/0d	LSC	SLC38A5	up
2.11e-65	1.49796	0.782	0.259	3e-61	3/0d	LSC	SLC2A1	up
2.97e-65	1.68371	0.265	0.003	4.21e-61	3/0d	LSC	LY6D	up
7.68e-65	1.13315	0.436	0.049	1.09e-60	3/0d	LSC	BNIP3	up
9.12e-65	1.45017	0.405	0.042	1.29e-60	3/0d	LSC	THBS1	up
3.67e-64	1.27499	0.48	0.07	5.21e-60	3/0d	LSC	ENSMFAG00000003078	up
4.54e-64	1.08068	0.346	0.024	6.44e-60	3/0d	LSC	EIF4EBP1	up
6.35e-64	1.69669	0.626	0.153	9e-60	3/0d	LSC	LAMA3	up
6.79e-64	1.45308	0.502	0.082	9.62e-60	3/0d	LSC	ITGAV	up
2.39e-63	1.09115	0.287	0.009	3.39e-59	3/0d	LSC	APOBEC3A	up
4.31e-62	1.44359	0.467	0.071	6.11e-58	3/0d	LSC	TPM2	up
2.06e-61	1.2974	0.377	0.037	2.92e-57	3/0d	LSC	CP	up
3.66e-61	1.07658	0.966	0.704	5.19e-57	3/0d	LSC	ENO1	up
1.19e-60	1.1416	0.302	0.016	1.69e-56	3/0d	LSC	ENSMFAG00000033629	up
2.13e-60	1.1817	0.234	0	3.03e-56	3/0d	LSC	CPA4	up
3.26e-60	1.19064	0.769	0.236	4.62e-56	3/0d	LSC	ENSMFAG00000002167	up
2.39e-58	1.03426	0.252	0.005	3.39e-54	3/0d	LSC	TYMP	up
5.08e-58	1.34624	0.763	0.249	7.21e-54	3/0d	LSC	ENSMFAG00000003772	up
5.43e-58	1.59464	0.791	0.315	7.7e-54	3/0d	LSC	ITGB4	up
3.42e-57	1.18165	0.897	0.468	4.84e-53	3/0d	LSC	ARPC2	up
5.1e-57	1.30671	0.262	0.009	7.23e-53	3/0d	LSC	CDKN2B	up
1.08e-56	1.26847	0.346	0.034	1.53e-52	3/0d	LSC	PHLDA2	up
1.17e-56	1.16338	0.919	0.521	1.66e-52	3/0d	LSC	ENSMFAG00000041919	up
3.62e-56	1.08742	0.277	0.014	5.13e-52	3/0d	LSC	TMEM255B	up
9.63e-56	1.17847	0.623	0.153	1.37e-51	3/0d	LSC	SEC61G	up
3.37e-54	1.03989	0.458	0.078	4.78e-50	3/0d	LSC	IDH2	up
4.35e-54	1.23644	0.583	0.141	6.17e-50	3/0d	LSC	NDRG1	up
1.02e-53	1.09275	0.919	0.514	1.45e-49	3/0d	LSC	YBX1	up
2.38e-53	1.03904	0.408	0.058	3.37e-49	3/0d	LSC	FXYD5	up
4.04e-53	1.24482	0.863	0.376	5.74e-49	3/0d	LSC	ENSMFAG00000000085	up
6.71e-53	1.08866	0.227	0.005	9.52e-49	3/0d	LSC	ENSMFAG00000037584	up
3.2e-52	1.44329	0.202	0	4.54e-48	3/0d	LSC	MMP13	up
3.71e-52	1.19932	0.704	0.217	5.26e-48	3/0d	LSC	MYH9	up
3.4e-51	1.06175	0.754	0.247	4.82e-47	3/0d	LSC	ARPC3	up
1.42e-50	1.1826	0.255	0.014	2.01e-46	3/0d	LSC	FST	up
2.17e-50	1.12128	0.324	0.035	3.08e-46	3/0d	LSC	CAV1	up
1.27e-48	1.21151	0.766	0.294	1.79e-44	3/0d	LSC	ANXA5	up
2.24e-48	1.28475	0.402	0.069	3.18e-44	3/0d	LSC	ENSMFAG00000041011	up
1.02e-47	1.00342	0.305	0.032	1.45e-43	3/0d	LSC	ENSMFAG00000039395	up
2.84e-47	1.42803	0.611	0.182	4.03e-43	3/0d	LSC	IFI27	up
5.89e-47	1.01204	0.555	0.136	8.35e-43	3/0d	LSC	TAX1BP3	up
1.08e-46	1.31685	0.243	0.015	1.54e-42	3/0d	LSC	CCN2	up
5.57e-46	1.00861	0.667	0.205	7.9e-42	3/0d	LSC	CAPG	up
1.63e-45	1.05796	0.29	0.03	2.32e-41	3/0d	LSC	MFAP2	up
1.5e-44	1.01575	0.754	0.282	2.13e-40	3/0d	LSC	ENSMFAG00000001022	up
2.91e-43	1.37961	0.352	0.058	4.13e-39	3/0d	LSC	PTGS2	up
2.89e-42	1.40079	0.71	0.313	4.1e-38	3/0d	LSC	ITGA2	up
9.78e-42	1.54075	0.184	0.005	1.39e-37	3/0d	LSC	S100A8	up
2.91e-41	1.0071	0.713	0.266	4.13e-37	3/0d	LSC	GPX4	up
6.73e-39	1.33531	0.819	0.366	9.54e-35	3/0d	LSC	CTSD	up
9.2e-38	1.15511	0.302	0.047	1.3e-33	3/0d	LSC	CCN1	up
3.23e-32	1.10866	0.274	0.047	4.58e-28	3/0d	LSC	ENSMFAG00000045681	up
3.35e-31	1.30144	0.502	0.177	4.75e-27	3/0d	LSC	MMP1	up
2.99e-29	1.10498	0.576	0.242	4.24e-25	3/0d	LSC	IGF2	up
4.15e-29	1.09027	0.243	0.042	5.89e-25	3/0d	LSC	LYPD2	up
1.01e-28	1.09018	0.115	0.001	1.44e-24	3/0d	LSC	SPINK5	up
1.24e-28	1.66539	0.386	0.12	1.76e-24	3/0d	LSC	SERPINB1	up
8.44e-12	1.09327	0.776	0.481	1.2e-07	3/0d	LSC	ENSMFAG00000043424	up
1.79e-170	4.71331	0.996	0.453	2.54e-166	1/0d	CC	APOBEC3A	up
1.23e-167	3.56328	0.985	0.625	1.74e-163	1/0d	CC	SERPINB1	up
9.12e-163	2.63666	0.996	0.897	1.29e-158	1/0d	CC	ENSMFAG00000001552	up
2.04e-148	4.00843	0.935	0.313	2.9e-144	1/0d	CC	KRT6A	up
3e-138	2.1372	0.989	0.848	4.26e-134	1/0d	CC	S100A10	up
7.09e-136	4.47595	0.919	0.364	1.01e-131	1/0d	CC	S100A9	up
4.16e-132	2.75628	0.978	0.853	5.9e-128	1/0d	CC	CSTB	up
7.08e-131	3.21152	0.884	0.237	1e-126	1/0d	CC	CTSL	up
5.73e-130	4.32972	0.762	0.038	8.13e-126	1/0d	CC	PI3	up
9.38e-129	2.69985	0.775	0.051	1.33e-124	1/0d	CC	ISG20	up
2.37e-124	2.30049	0.841	0.159	3.36e-120	1/0d	CC	MAP4K4	up
1.46e-120	2.99167	0.9	0.346	2.06e-116	1/0d	CC	ITGA2	up
8.58e-115	2.72602	0.766	0.098	1.22e-110	1/0d	CC	ENSMFAG00000044185	up
2.98e-114	2.28139	0.72	0.056	4.23e-110	1/0d	CC	ENSMFAG00000045648	up
8.28e-114	4.3518	0.821	0.234	1.17e-109	1/0d	CC	S100A8	up
2.45e-111	2.81587	0.792	0.179	3.47e-107	1/0d	CC	ENSMFAG00000000419	up
5.08e-111	3.80902	0.701	0.051	7.21e-107	1/0d	CC	ENSMFAG00000030902	up
1.46e-108	2.10783	0.996	0.989	2.07e-104	1/0d	CC	ANXA1	up
6.8e-106	2.05994	0.827	0.268	9.65e-102	1/0d	CC	ANXA5	up
1.81e-103	2.15145	0.786	0.163	2.57e-99	1/0d	CC	UGCG	up
2.23e-102	2.4285	0.88	0.38	3.16e-98	1/0d	CC	SLC6A14	up
6.57e-98	1.76062	0.923	0.582	9.32e-94	1/0d	CC	PTP4A1	up
5.63e-97	2.07806	0.747	0.163	7.98e-93	1/0d	CC	RBM47	up
9.37e-95	2.31999	0.878	0.435	1.33e-90	1/0d	CC	CXCL17	up
2.87e-91	1.75876	0.899	0.507	4.07e-87	1/0d	CC	SERPINB5	up
7.04e-91	1.51048	0.991	0.958	9.98e-87	1/0d	CC	SFN	up
3.3e-89	1.28625	0.959	0.841	4.68e-85	1/0d	CC	EIF4A1	up
4.97e-87	2.01303	0.657	0.087	7.05e-83	1/0d	CC	TMPRSS11D	up
3.87e-85	2.67142	0.673	0.112	5.48e-81	1/0d	CC	KRT23	up
1.29e-82	1.88973	0.821	0.344	1.82e-78	1/0d	CC	NDRG1	up
4.68e-82	1.59934	0.554	0.022	6.64e-78	1/0d	CC	ENSMFAG00000034637	up
5.51e-82	1.97733	0.834	0.377	7.82e-78	1/0d	CC	ETV3	up
8.26e-81	2.35725	0.611	0.069	1.17e-76	1/0d	CC	ENSMFAG00000001838	up
1.27e-79	3.5806	0.622	0.094	1.81e-75	1/0d	CC	IFI27	up
1.3e-79	2.04519	0.804	0.389	1.85e-75	1/0d	CC	ENSMFAG00000040595	up
4.55e-79	3.01843	0.666	0.15	6.45e-75	1/0d	CC	ALDH1A3	up
1.58e-78	3.57655	0.775	0.257	2.24e-74	1/0d	CC	SERPINB2	up
3.53e-76	1.63216	0.83	0.366	5.01e-72	1/0d	CC	ST14	up
3.48e-75	1.71005	0.924	0.726	4.93e-71	1/0d	CC	CD55	up
5.53e-74	2.14525	0.517	0.024	7.84e-70	1/0d	CC	ENSMFAG00000002981	up
2.42e-73	1.80264	0.747	0.264	3.44e-69	1/0d	CC	GJB4	up
1.64e-72	2.45861	0.67	0.196	2.33e-68	1/0d	CC	GPX2	up
1.44e-71	1.56665	0.614	0.105	2.04e-67	1/0d	CC	FHL2	up
3.94e-71	1.78332	0.701	0.217	5.59e-67	1/0d	CC	B4GALT5	up
3.4e-70	1.10465	0.974	0.899	4.83e-66	1/0d	CC	TMSB10	up
2.52e-69	2.01675	0.456	0.005	3.57e-65	1/0d	CC	DHRS9	up
3.74e-69	1.76488	0.559	0.071	5.3e-65	1/0d	CC	TXNRD1	up
1.03e-68	1.80643	0.703	0.226	1.47e-64	1/0d	CC	IL6ST	up
4.46e-64	1.83035	0.524	0.067	6.33e-60	1/0d	CC	GPRC5A	up
4.12e-63	1.43096	0.566	0.092	5.85e-59	1/0d	CC	CPM	up
7.96e-63	1.37897	0.828	0.466	1.13e-58	1/0d	CC	TOP1	up
1.09e-62	1.32874	0.421	0.005	1.55e-58	1/0d	CC	SLC28A3	up
3.28e-61	3.1286	0.465	0.04	4.65e-57	1/0d	CC	HMOX1	up
1.46e-60	1.52264	0.482	0.045	2.07e-56	1/0d	CC	TMPRSS2	up
1.7e-60	1.03009	0.987	0.886	2.41e-56	1/0d	CC	EZR	up
1.6e-59	1.43879	0.627	0.168	2.26e-55	1/0d	CC	IL4R	up
1.81e-59	1.97046	0.441	0.027	2.57e-55	1/0d	CC	ENSMFAG00000037676	up
4.77e-59	1.03604	0.996	0.987	6.77e-55	1/0d	CC	ACTG1	up
8.23e-59	1.8076	0.633	0.19	1.17e-54	1/0d	CC	ENSMFAG00000038147	up
1.66e-57	1.41805	0.843	0.524	2.35e-53	1/0d	CC	TUBA1C	up
2.12e-57	1.62145	0.867	0.469	3e-53	1/0d	CC	PIP	up
4.09e-57	1.72393	0.576	0.145	5.81e-53	1/0d	CC	ENSMFAG00000039151	up
1.62e-56	1.29168	0.5	0.065	2.29e-52	1/0d	CC	CXCL16	up
8.78e-56	1.16363	0.91	0.712	1.24e-51	1/0d	CC	CLDN7	up
3.72e-55	1.7505	0.539	0.109	5.27e-51	1/0d	CC	ENSMFAG00000037584	up
5.57e-54	1.47365	0.655	0.208	7.9e-50	1/0d	CC	RNF213	up
6.23e-54	1.58104	0.836	0.473	8.84e-50	1/0d	CC	PHLDA2	up
1.32e-52	1.33086	0.478	0.072	1.88e-48	1/0d	CC	TGM2	up
3.51e-51	2.04506	0.406	0.033	4.98e-47	1/0d	CC	PADI1	up
5.87e-51	1.12882	0.461	0.065	8.33e-47	1/0d	CC	TNFRSF10A	up
5.98e-51	1.58768	0.461	0.063	8.49e-47	1/0d	CC	MUC1	up
5.13e-50	1.49715	0.587	0.17	7.28e-46	1/0d	CC	MXD1	up
5.23e-50	1.52239	0.738	0.384	7.42e-46	1/0d	CC	SOD2	up
9.1e-49	1.11935	0.362	0.014	1.29e-44	1/0d	CC	CNN3	up
2.76e-47	1.44149	0.478	0.096	3.91e-43	1/0d	CC	ATP1B1	up
6.11e-47	1.17233	0.729	0.342	8.66e-43	1/0d	CC	RAP1B	up
1.06e-46	1.08588	0.376	0.029	1.5e-42	1/0d	CC	PLS1	up
1.13e-46	1.27824	0.421	0.056	1.61e-42	1/0d	CC	DUSP5	up
1.26e-46	3.14009	0.576	0.205	1.79e-42	1/0d	CC	S100A2	up
2.07e-46	1.16432	0.756	0.397	2.93e-42	1/0d	CC	MAST4	up
3.83e-46	1.20269	0.692	0.293	5.44e-42	1/0d	CC	NABP1	up
3.99e-46	1.25946	0.421	0.053	5.66e-42	1/0d	CC	ENSMFAG00000042283	up
5.13e-46	1.2205	0.552	0.158	7.28e-42	1/0d	CC	TNIP2	up
1.48e-45	1.18985	0.482	0.096	2.1e-41	1/0d	CC	FAM83A	up
3.29e-45	1.03371	0.317	0.004	4.67e-41	1/0d	CC	ENSMFAG00000000396	up
4.74e-45	1.15321	0.417	0.056	6.72e-41	1/0d	CC	EHD4	up
8.84e-45	1.21416	0.729	0.375	1.25e-40	1/0d	CC	MACF1	up
3.5e-43	1.1767	0.91	0.855	4.96e-39	1/0d	CC	GSTA3	up
1.06e-42	1.0049	0.836	0.536	1.5e-38	1/0d	CC	PFN1	up
1.56e-42	1.21709	0.476	0.109	2.21e-38	1/0d	CC	ENSMFAG00000040946	up
2.55e-42	1.20463	0.554	0.174	3.62e-38	1/0d	CC	LRRC8A	up
3.94e-42	1.19727	0.506	0.139	5.59e-38	1/0d	CC	RAB31	up
2.94e-41	1.04554	0.288	0.002	4.17e-37	1/0d	CC	MYO1B	up
6.68e-41	1.1777	0.493	0.134	9.48e-37	1/0d	CC	IL1R1	up
1.58e-40	1.07734	0.747	0.424	2.24e-36	1/0d	CC	TMEM40	up
5.06e-40	1.07072	0.644	0.281	7.18e-36	1/0d	CC	IFNGR2	up
1.48e-39	1.15227	0.352	0.038	2.1e-35	1/0d	CC	SULT2B1	up
1.75e-39	1.0492	0.651	0.288	2.49e-35	1/0d	CC	LSR	up
1.87e-39	1.06828	0.672	0.31	2.65e-35	1/0d	CC	ARPC5L	up
1.95e-39	1.08772	0.664	0.322	2.77e-35	1/0d	CC	JPT1	up
3.1e-39	1.18938	0.513	0.149	4.4e-35	1/0d	CC	HIF1A	up
3.91e-39	1.11913	0.849	0.596	5.54e-35	1/0d	CC	EHF	up
7.56e-39	1.27918	0.589	0.214	1.07e-34	1/0d	CC	GJB2	up
1.4e-37	1.64341	0.299	0.018	1.99e-33	1/0d	CC	DUOXA2	up
3.45e-37	1.0685	0.341	0.042	4.89e-33	1/0d	CC	ENSMFAG00000027255	up
4.64e-37	1.10093	0.596	0.259	6.58e-33	1/0d	CC	PSMD12	up
2.18e-36	2.63379	0.45	0.13	3.1e-32	1/0d	CC	PLAUR	up
1.15e-35	1.14004	0.672	0.33	1.64e-31	1/0d	CC	CDKN2B	up
1.55e-35	1.20269	0.524	0.185	2.19e-31	1/0d	CC	TPM4	up
5.34e-35	1.03293	0.264	0.009	7.57e-31	1/0d	CC	UPP1	up
6.99e-35	1.30315	0.496	0.165	9.92e-31	1/0d	CC	LRG1	up
1.18e-34	1.84406	0.526	0.201	1.68e-30	1/0d	CC	PLAU	up
2.31e-34	1.38391	0.839	0.696	3.28e-30	1/0d	CC	HOPX	up
5.13e-34	1.00887	0.642	0.303	7.27e-30	1/0d	CC	BCL10	up
1.9e-33	1.68272	0.5	0.185	2.7e-29	1/0d	CC	WFDC2	up
2.19e-33	1.43243	0.325	0.047	3.11e-29	1/0d	CC	LAMC2	up
6.64e-33	1.40527	0.493	0.183	9.42e-29	1/0d	CC	PLAT	up
2.95e-32	1.40454	0.843	0.708	4.18e-28	1/0d	CC	DSG3	up
2.96e-32	1.02853	0.496	0.167	4.2e-28	1/0d	CC	EPS8L1	up
8.08e-32	1.1651	0.223	0	1.15e-27	1/0d	CC	ENSMFAG00000000741	up
3.28e-31	1.01595	0.48	0.158	4.66e-27	1/0d	CC	FOSL1	up
4.37e-31	1.99933	0.277	0.029	6.2e-27	1/0d	CC	VMO1	up
5.66e-31	1.35938	0.415	0.125	8.02e-27	1/0d	CC	SPATS2L	up
5.87e-31	1.86811	0.541	0.241	8.33e-27	1/0d	CC	F3	up
1.28e-30	1.02528	0.614	0.297	1.82e-26	1/0d	CC	PRRG4	up
1.53e-30	1.02201	0.369	0.083	2.17e-26	1/0d	CC	SIPA1L2	up
5.75e-30	1.0386	0.304	0.043	8.15e-26	1/0d	CC	KRT7	up
1.32e-29	1.21413	0.399	0.109	1.87e-25	1/0d	CC	ECM1	up
1.62e-29	1.28084	0.592	0.283	2.29e-25	1/0d	CC	HBEGF	up
1.6e-27	1.31576	0.485	0.196	2.27e-23	1/0d	CC	CLCF1	up
6.79e-27	1.02484	0.517	0.212	9.63e-23	1/0d	CC	FAM3D	up
8.81e-27	1.67628	0.197	0.004	1.25e-22	1/0d	CC	FST	up
9.88e-27	1.66392	0.21	0.009	1.4e-22	1/0d	CC	IVL	up
1.15e-24	1.54854	0.515	0.241	1.63e-20	1/0d	CC	IFI6	up
1.92e-24	1.10158	0.959	0.868	2.73e-20	1/0d	CC	EMP1	up
2.08e-24	2.33258	0.303	0.072	2.95e-20	1/0d	CC	KRT17	up
1.92e-21	1.44396	0.19	0.016	2.72e-17	1/0d	CC	PLAAT2	up
1.42e-20	1.29006	0.146	0	2.01e-16	1/0d	CC	SERPINA3	up
3.59e-20	1.32366	0.161	0.007	5.1e-16	1/0d	CC	CXCL6	up
9.13e-20	1.51243	0.153	0.005	1.29e-15	1/0d	CC	CXCL8	up
4.92e-19	3.26512	0.135	0	6.98e-15	1/0d	CC	SCGB3A1	up
2.15e-18	1.24383	0.203	0.034	3.05e-14	1/0d	CC	ENSMFAG00000002495	up
6.34e-16	1.39962	0.216	0.053	8.99e-12	1/0d	CC	MMP1	up
7.52e-16	1.14255	0.116	0.002	1.07e-11	1/0d	CC	CCL20	up
1.31e-12	1.33904	0.17	0.04	1.85e-08	1/0d	CC	TIMP1	up
2.55e-08	1.83269	0.673	0.679	0.000362053	1/0d	CC	MT3	up
9.46e-121	3.74322	0.692	0	1.34e-116	3/1d	CC	SPINK5	up
1.29e-120	1.33282	0.997	0.989	1.83e-116	3/1d	CC	ENSMFAG00000043121	up
4.71e-110	1.13729	0.995	0.958	6.68e-106	3/1d	CC	RPLP0	up
4.96e-108	1.17985	0.997	0.974	7.03e-104	3/1d	CC	TMSB10	up
9.62e-103	1.76756	0.949	0.583	1.36e-98	3/1d	CC	ENSMFAG00000039068	up
2.43e-101	1.53668	0.928	0.53	3.44e-97	3/1d	CC	ARPC1B	up
1.59e-100	1.72893	0.953	0.609	2.26e-96	3/1d	CC	ENSMFAG00000000455	up
2.53e-98	2.72047	0.638	0.035	3.59e-94	3/1d	CC	LY6D	up
7.9e-88	2.27821	0.759	0.161	1.12e-83	3/1d	CC	CXCL6	up
2e-82	1.0874	0.99	0.91	2.84e-78	3/1d	CC	HSPB1	up
1.74e-80	4.32469	0.673	0.137	2.47e-76	3/1d	CC	KRT16	up
3.14e-80	2.1687	0.9	0.683	4.46e-76	3/1d	CC	CSTA	up
1.64e-76	1.88444	0.995	0.985	2.33e-72	3/1d	CC	FTH1	up
9.23e-76	1.23493	0.965	0.74	1.31e-71	3/1d	CC	TXNDC17	up
5.76e-73	1.24444	0.953	0.83	8.16e-69	3/1d	CC	RPS24	up
1.68e-71	2.12273	0.462	0	2.38e-67	3/1d	CC	RBP1	up
7.28e-71	3.97751	0.801	0.314	1.03e-66	3/1d	CC	KRT14	up
9.85e-70	1.15516	0.907	0.579	1.4e-65	3/1d	CC	DSTN	up
6.22e-68	1.38583	0.902	0.566	8.82e-64	3/1d	CC	DYNLL1	up
1.32e-65	1.60195	0.9	0.601	1.87e-61	3/1d	CC	CTSD	up
5.2e-64	1.21963	0.876	0.461	7.37e-60	3/1d	CC	ATF3	up
6.68e-64	1.34444	0.498	0.046	9.48e-60	3/1d	CC	NCCRP1	up
9e-63	1.66491	0.414	0	1.28e-58	3/1d	CC	ARG1	up
4.27e-62	1.75189	0.622	0.164	6.05e-58	3/1d	CC	ENSMFAG00000041011	up
5.56e-61	1.30543	0.941	0.747	7.89e-57	3/1d	CC	S100A14	up
3.37e-59	1.30298	0.427	0.017	4.78e-55	3/1d	CC	BNIP3	up
1.64e-58	1.82085	0.517	0.087	2.33e-54	3/1d	CC	NDUFA4L2	up
8.86e-57	1.05429	0.881	0.557	1.26e-52	3/1d	CC	ATOX1	up
7.62e-56	1.76807	0.965	0.891	1.08e-51	3/1d	CC	KRT5	up
1.85e-55	1.62891	0.727	0.304	2.62e-51	3/1d	CC	KRT7	up
2.82e-53	1.43381	0.998	0.967	4e-49	3/1d	CC	ENSMFAG00000032417	up
1.69e-51	1.05781	0.708	0.269	2.39e-47	3/1d	CC	CHMP5	up
3e-51	1.30289	0.537	0.118	4.25e-47	3/1d	CC	TNFSF10	up
5.47e-51	1.69568	0.537	0.131	7.76e-47	3/1d	CC	MDK	up
9.81e-49	1.3085	0.51	0.109	1.39e-44	3/1d	CC	TPM1	up
1.03e-48	1.17828	0.393	0.031	1.46e-44	3/1d	CC	CLIC3	up
1.51e-48	1.06963	0.47	0.077	2.14e-44	3/1d	CC	IDH1	up
2.09e-46	1.03432	0.579	0.168	2.97e-42	3/1d	CC	SERPINB6	up
2.58e-46	1.00896	0.36	0.02	3.66e-42	3/1d	CC	CALD1	up
5.52e-46	1.53663	0.545	0.166	7.83e-42	3/1d	CC	ENSMFAG00000040216	up
6.32e-45	1.15315	0.661	0.292	8.96e-41	3/1d	CC	DBI	up
7.09e-43	1.16767	0.542	0.162	1e-38	3/1d	CC	CLCA2	up
1.49e-41	1.016	0.741	0.384	2.12e-37	3/1d	CC	ETFB	up
8.22e-38	1.34643	0.851	0.561	1.17e-33	3/1d	CC	ENSMFAG00000039064	up
1.23e-37	1.292	0.353	0.042	1.75e-33	3/1d	CC	CYP1B1	up
2.11e-35	1.05695	0.556	0.22	3e-31	3/1d	CC	CTSH	up
3.12e-34	1.01973	0.939	0.884	4.42e-30	3/1d	CC	S100A16	up
4.59e-33	1.07258	0.561	0.244	6.5e-29	3/1d	CC	ENSMFAG00000003238	up
4.22e-31	1.15461	0.46	0.151	5.98e-27	3/1d	CC	DCN	up
1.44e-29	1.1055	0.6	0.301	2.04e-25	3/1d	CC	TKT	up
3.98e-28	2.0227	0.201	0	5.64e-24	3/1d	CC	FN1	up
3.41e-25	1.19255	0.678	0.441	4.84e-21	3/1d	CC	ENSMFAG00000037676	up
9.18e-25	1.10113	0.409	0.146	1.3e-20	3/1d	CC	RHCG	up
1.22e-21	1.18181	0.981	0.919	1.74e-17	3/1d	CC	S100A9	up
4.25e-20	1.01755	0.559	0.334	6.03e-16	3/1d	CC	LYNX1-SLURP2	up
6.78e-20	1.10953	0.972	0.935	9.62e-16	3/1d	CC	KRT6A	up
1.25e-18	1.18362	0.147	0.006	1.77e-14	3/1d	CC	SPP1	up
9.46e-12	1.19244	0.911	0.821	1.34e-07	3/1d	CC	S100A8	up
2.64e-08	1.44346	0.175	0.066	0.000373794	3/1d	CC	S100P	up
2.93e-08	1.0019	0.133	0.041	0.00041607	3/1d	CC	KRT78	up
2.78e-07	1.19354	0.133	0.046	0.00394299	3/1d	CC	ENSMFAG00000042071	up
1.63e-06	1.08465	0.537	0.467	0.0231739	3/1d	CC	IFITM1	up
1.74e-169	2.2845	0.997	0.899	2.47e-165	3/0d	CC	TMSB10	up
2.11e-169	5.65777	0.981	0.364	3e-165	3/0d	CC	S100A9	up
5.52e-166	5.11797	0.972	0.313	7.83e-162	3/0d	CC	KRT6A	up
1.27e-164	2.95916	0.997	0.853	1.8e-160	3/0d	CC	CSTB	up
5.88e-161	2.89278	1	0.897	8.34e-157	3/0d	CC	ENSMFAG00000001552	up
1.14e-144	5.54424	0.911	0.234	1.62e-140	3/0d	CC	S100A8	up
1.63e-137	3.60187	0.759	0.007	2.31e-133	3/0d	CC	CXCL6	up
2.7e-135	2.97785	0.946	0.389	3.82e-131	3/0d	CC	ENSMFAG00000040595	up
6.87e-130	1.2144	1	0.993	9.74e-126	3/0d	CC	ENSMFAG00000037514	up
1.8e-117	2.66751	0.727	0.043	2.55e-113	3/0d	CC	KRT7	up
8.98e-116	3.09933	0.747	0.072	1.27e-111	3/0d	CC	KRT17	up
1.37e-113	1.20841	1	1	1.95e-109	3/0d	CC	S100A6	up
3.36e-112	3.16301	0.678	0.027	4.77e-108	3/0d	CC	ENSMFAG00000037676	up
9.05e-112	3.35025	0.692	0.031	1.28e-107	3/0d	CC	SPINK5	up
2.06e-111	5.12782	0.673	0.025	2.91e-107	3/0d	CC	KRT16	up
8.98e-109	1.84187	0.981	0.848	1.27e-104	3/0d	CC	S100A10	up
9.74e-107	1.59978	0.928	0.491	1.38e-102	3/0d	CC	ARPC1B	up
3.22e-102	1.6055	0.965	0.639	4.56e-98	3/0d	CC	TXNDC17	up
8.82e-100	2.95874	0.743	0.15	1.25e-95	3/0d	CC	ALDH1A3	up
1.22e-98	2.67755	0.638	0.036	1.73e-94	3/0d	CC	LY6D	up
6.77e-96	5.25506	0.801	0.221	9.6e-92	3/0d	CC	KRT14	up
6.36e-95	2.77572	0.953	0.453	9.02e-91	3/0d	CC	APOBEC3A	up
4.96e-94	2.16603	0.995	0.975	7.04e-90	3/0d	CC	FTH1	up
1.21e-92	1.3769	0.958	0.707	1.72e-88	3/0d	CC	ENSMFAG00000036866	up
2.47e-92	3.29301	0.748	0.205	3.5e-88	3/0d	CC	S100A2	up
2.4e-90	2.22497	0.927	0.625	3.4e-86	3/0d	CC	SERPINB1	up
1.93e-89	2.58259	0.6	0.038	2.74e-85	3/0d	CC	PI3	up
3.73e-88	1.02978	0.997	0.995	5.29e-84	3/0d	CC	ENSMFAG00000043121	up
5.63e-87	2.06105	0.678	0.109	7.98e-83	3/0d	CC	ENSMFAG00000037584	up
8.28e-85	1.94876	0.661	0.098	1.17e-80	3/0d	CC	ENSMFAG00000044185	up
1.19e-83	1.49782	0.907	0.507	1.69e-79	3/0d	CC	SERPINB5	up
1.21e-79	1.58477	0.941	0.761	1.72e-75	3/0d	CC	S100A14	up
8.13e-79	1.73428	0.939	0.779	1.15e-74	3/0d	CC	S100A16	up
4.17e-78	2.14747	0.9	0.775	5.91e-74	3/0d	CC	CSTA	up
1.23e-77	1.59983	0.556	0.045	1.74e-73	3/0d	CC	CTSH	up
1.88e-77	1.55252	0.619	0.087	2.67e-73	3/0d	CC	TMPRSS11D	up
5.59e-73	1.41632	0.498	0.018	7.93e-69	3/0d	CC	NCCRP1	up
7.78e-73	1.20897	0.907	0.549	1.1e-68	3/0d	CC	DSTN	up
1.26e-72	2.12273	0.462	0	1.79e-68	3/0d	CC	RBP1	up
1.24e-71	1.39272	0.911	0.587	1.76e-67	3/0d	CC	PRDX6	up
1.98e-71	1.93496	0.622	0.125	2.8e-67	3/0d	CC	ENSMFAG00000041011	up
1.82e-66	1.70417	0.439	0.005	2.57e-62	3/0d	CC	DHRS9	up
3.95e-66	1.72547	0.874	0.422	5.6e-62	3/0d	CC	CP	up
3.89e-65	1.05245	0.998	0.958	5.51e-61	3/0d	CC	S100A4	up
9.02e-64	1.66491	0.414	0	1.28e-59	3/0d	CC	ARG1	up
8.19e-63	1.68125	0.409	0	1.16e-58	3/0d	CC	RHCG	up
1.82e-62	2.93426	0.486	0.051	2.58e-58	3/0d	CC	ENSMFAG00000030902	up
3.09e-62	1.01705	0.934	0.734	4.39e-58	3/0d	CC	ENSMFAG00000032872	up
5.97e-62	1.28755	0.647	0.163	8.46e-58	3/0d	CC	UGCG	up
7.35e-62	1.70937	0.519	0.063	1.04e-57	3/0d	CC	MUC1	up
1.69e-61	1.33639	0.551	0.085	2.4e-57	3/0d	CC	TYMP	up
3.36e-59	1.22043	0.589	0.121	4.76e-55	3/0d	CC	SDCBP2	up
3.61e-56	1.26084	0.427	0.027	5.12e-52	3/0d	CC	BNIP3	up
5.77e-54	1.28282	0.984	0.9	8.19e-50	3/0d	CC	LGALS3	up
3.88e-53	1.27464	0.458	0.053	5.5e-49	3/0d	CC	ENSMFAG00000042283	up
1.08e-52	1.14221	0.535	0.105	1.54e-48	3/0d	CC	FHL2	up
1.55e-52	1.16944	0.731	0.295	2.2e-48	3/0d	CC	ENSMFAG00000020774	up
4.01e-52	1.27594	0.57	0.147	5.69e-48	3/0d	CC	CARHSP1	up
2.07e-51	1.41048	0.386	0.022	2.93e-47	3/0d	CC	GEM	up
2.5e-51	1.13022	0.579	0.145	3.55e-47	3/0d	CC	SERPINB6	up
2.73e-50	1.30825	0.753	0.373	3.88e-46	3/0d	CC	UPK1B	up
1.54e-49	1.11752	0.47	0.078	2.19e-45	3/0d	CC	IDH1	up
2.96e-49	1.09194	0.619	0.185	4.2e-45	3/0d	CC	TPM4	up
9.32e-48	1.63635	0.689	0.306	1.32e-43	3/0d	CC	ENSMFAG00000043412	up
5.55e-47	1.58329	0.537	0.143	7.87e-43	3/0d	CC	MDK	up
2.19e-46	1.06902	0.902	0.69	3.1e-42	3/0d	CC	DYNLL1	up
3.15e-43	1.46601	0.568	0.196	4.47e-39	3/0d	CC	PPIF	up
8.78e-43	1.05111	0.561	0.17	1.25e-38	3/0d	CC	MXD1	up
2.15e-42	1.13477	0.29	0	3.05e-38	3/0d	CC	GABRP	up
2.57e-42	1.54277	0.343	0.024	3.64e-38	3/0d	CC	ENSMFAG00000002981	up
8.54e-42	1.41605	0.353	0.034	1.21e-37	3/0d	CC	CYP1B1	up
1.23e-41	2.04407	0.537	0.181	1.75e-37	3/0d	CC	IFITM1	up
1.57e-40	1.02151	0.322	0.02	2.22e-36	3/0d	CC	ENSMFAG00000033315	up
3.93e-40	1.13808	0.542	0.179	5.57e-36	3/0d	CC	CLCA2	up
2.99e-39	2.08187	0.451	0.112	4.24e-35	3/0d	CC	KRT23	up
1.7e-37	1.24117	0.309	0.024	2.41e-33	3/0d	CC	ENSMFAG00000045681	up
3.83e-35	1.29981	0.266	0.009	5.43e-31	3/0d	CC	IVL	up
4.45e-33	1.22914	0.448	0.13	6.31e-29	3/0d	CC	PLAUR	up
7.07e-33	1.28529	0.514	0.196	1e-28	3/0d	CC	GPX2	up
7.19e-33	1.00842	0.26	0.014	1.02e-28	3/0d	CC	ITGB6	up
9.85e-32	1.02401	0.561	0.237	1.4e-27	3/0d	CC	ENSMFAG00000003238	up
1.55e-31	1.58108	0.283	0.029	2.2e-27	3/0d	CC	PLAC8	up
1.04e-29	3.19451	0.367	0.094	1.47e-25	3/0d	CC	IFI27	up
1.37e-28	2.0227	0.201	0	1.94e-24	3/0d	CC	FN1	up
1.33e-27	1.41177	0.498	0.214	1.89e-23	3/0d	CC	GJB2	up
1.98e-26	1.01011	0.61	0.315	2.81e-22	3/0d	CC	ENSMFAG00000003093	up
1.68e-24	1.13177	0.339	0.096	2.38e-20	3/0d	CC	ATP1B1	up
6.83e-23	1.03883	0.509	0.241	9.69e-19	3/0d	CC	F3	up
1.2e-21	2.10087	0.175	0.009	1.7e-17	3/0d	CC	S100P	up
9.08e-21	1.19684	0.147	0	1.29e-16	3/0d	CC	SPP1	up
2.02e-20	1.03701	0.545	0.337	2.87e-16	3/0d	CC	ENSMFAG00000040216	up
8.97e-19	1.13091	0.554	0.33	1.27e-14	3/0d	CC	CDKN2B	up
1.87e-18	1.27416	0.143	0.005	2.65e-14	3/0d	CC	CXCL8	up
2.38e-18	1.1298	0.147	0.007	3.37e-14	3/0d	CC	CXCL1	up
2.01e-17	1.12498	0.253	0.069	2.85e-13	3/0d	CC	ENSMFAG00000001838	up
3.47e-17	2.2461	0.159	0.016	4.92e-13	3/0d	CC	PLAAT2	up
7.26e-17	1.38669	0.283	0.096	1.03e-12	3/0d	CC	ISG15	up
3.23e-15	1.71843	0.107	0	4.58e-11	3/0d	CC	ENSMFAG00000044536	up
1.07e-13	1.59068	0.423	0.241	1.51e-09	3/0d	CC	IFI6	up
2.3e-12	1.40538	0.133	0.022	3.26e-08	3/0d	CC	ENSMFAG00000042071	up
9.42e-12	1.62462	0.14	0.029	1.34e-07	3/0d	CC	VMO1	up
2.08e-09	1.13267	0.131	0.034	2.95e-05	3/0d	CC	ENSMFAG00000002495	up
4.37e-124	3.99906	0.972	0.281	6.19e-120	1/0d	BC	CTSL	up
7.16e-121	2.60603	1	0.844	1.02e-116	1/0d	BC	SFN	up
9.72e-84	2.6472	0.758	0.094	1.38e-79	1/0d	BC	CYP26B1	up
1.52e-82	2.76338	0.833	0.216	2.16e-78	1/0d	BC	PLAU	up
5.68e-81	2.72761	0.7	0.046	8.06e-77	1/0d	BC	APOBEC3A	up
4.15e-72	2.42221	0.711	0.108	5.89e-68	1/0d	BC	SERPINB1	up
1.79e-65	1.2445	0.989	0.94	2.54e-61	1/0d	BC	ACTG1	up
2.92e-65	1.22227	0.992	0.93	4.14e-61	1/0d	BC	ENSMFAG00000000085	up
3.17e-65	1.87376	0.806	0.255	4.5e-61	1/0d	BC	ENSMFAG00000045648	up
7.87e-61	1.5252	0.922	0.56	1.12e-56	1/0d	BC	SERPINB5	up
1.41e-60	2.2603	0.617	0.082	1.99e-56	1/0d	BC	ENSMFAG00000000419	up
3.67e-59	1.91793	0.797	0.288	5.21e-55	1/0d	BC	GJB4	up
8.78e-59	3.38078	0.514	0.012	1.25e-54	1/0d	BC	HMOX1	up
3.55e-56	1.08101	0.997	0.959	5.03e-52	1/0d	BC	ANXA1	up
2.79e-55	2.14877	0.65	0.144	3.96e-51	1/0d	BC	PHLDA2	up
1e-53	1.14103	0.956	0.796	1.42e-49	1/0d	BC	PRDX5	up
8.33e-53	1.1891	0.95	0.776	1.18e-48	1/0d	BC	EIF4A1	up
1.42e-52	1.52815	0.872	0.502	2.01e-48	1/0d	BC	TACSTD2	up
5.54e-51	1.96268	0.689	0.202	7.86e-47	1/0d	BC	THBS1	up
5.22e-48	1.1811	0.972	0.767	7.41e-44	1/0d	BC	EMP1	up
6.96e-47	1.48494	0.778	0.353	9.87e-43	1/0d	BC	TUBA1C	up
1.02e-44	1.57929	0.556	0.096	1.45e-40	1/0d	BC	UGCG	up
3.46e-44	1.28969	0.969	0.654	4.91e-40	1/0d	BC	PTGS2	up
9.77e-44	1.25359	0.922	0.704	1.39e-39	1/0d	BC	ITGA2	up
2.56e-40	1.56059	0.472	0.058	3.63e-36	1/0d	BC	CLDN7	up
5.33e-40	1.07914	0.914	0.721	7.56e-36	1/0d	BC	ENSMFAG00000001552	up
8.29e-39	1.23486	0.847	0.519	1.18e-34	1/0d	BC	CD44	up
3.06e-38	1.98654	0.581	0.166	4.34e-34	1/0d	BC	LAMC2	up
4.56e-38	1.53774	0.486	0.087	6.47e-34	1/0d	BC	PHLDB2	up
6.97e-36	2.55833	0.386	0.031	9.88e-32	1/0d	BC	KRT24	up
2.74e-34	2.04948	0.35	0.019	3.88e-30	1/0d	BC	KRT6A	up
2.38e-33	1.32059	0.608	0.204	3.38e-29	1/0d	BC	IL6ST	up
2.06e-32	1.41559	0.619	0.248	2.92e-28	1/0d	BC	SDC4	up
9.47e-31	1.76713	0.519	0.156	1.34e-26	1/0d	BC	HBEGF	up
1.43e-28	1.18841	0.5	0.147	2.02e-24	1/0d	BC	FSCN1	up
1.66e-28	1.38576	0.919	0.815	2.36e-24	1/0d	BC	MT3	up
1.61e-27	1.1959	0.608	0.243	2.28e-23	1/0d	BC	PTP4A1	up
1.8e-27	1.48914	0.617	0.303	2.55e-23	1/0d	BC	ENSMFAG00000043037	up
3.36e-27	1.19051	0.456	0.12	4.77e-23	1/0d	BC	MAP4K4	up
2.03e-26	1.25951	0.4	0.091	2.87e-22	1/0d	BC	IL4R	up
2.41e-26	1.29189	0.461	0.137	3.42e-22	1/0d	BC	TMPRSS11D	up
1.45e-25	1.14412	0.761	0.5	2.06e-21	1/0d	BC	LYPD3	up
1.54e-25	1.05517	0.728	0.445	2.19e-21	1/0d	BC	MAST4	up
5.46e-25	1.26601	0.453	0.13	7.74e-21	1/0d	BC	GEM	up
5.14e-24	1.05631	0.569	0.238	7.3e-20	1/0d	BC	TNFRSF1A	up
2.61e-23	1.24192	0.536	0.216	3.7e-19	1/0d	BC	NDRG1	up
4.14e-23	1.26315	0.444	0.142	5.87e-19	1/0d	BC	MDM2	up
1.46e-22	1.33441	0.631	0.339	2.07e-18	1/0d	BC	NFKBIA	up
2.38e-22	1.08308	0.447	0.144	3.37e-18	1/0d	BC	SEMA4B	up
1.6e-21	1.01355	0.267	0.031	2.28e-17	1/0d	BC	ISG20	up
8.89e-21	1.0088	0.494	0.192	1.26e-16	1/0d	BC	GNL3	up
1.01e-20	1.70214	0.214	0.01	1.43e-16	1/0d	BC	KRT27	up
1.2e-20	1.13422	0.714	0.469	1.7e-16	1/0d	BC	LAMA3	up
1.74e-20	1.81506	0.325	0.07	2.46e-16	1/0d	BC	MMP1	up
3.53e-20	1.00413	0.478	0.19	5.01e-16	1/0d	BC	FAM83A	up
4.03e-19	1.09546	0.514	0.233	5.71e-15	1/0d	BC	ST3GAL6	up
3.1e-17	1.06875	0.458	0.209	4.4e-13	1/0d	BC	DSG3	up
3.68e-17	1.08644	0.378	0.137	5.22e-13	1/0d	BC	RRAS2	up
5.4e-16	1.00668	0.203	0.024	7.66e-12	1/0d	BC	EGLN3	up
1.11e-15	1.08562	0.494	0.236	1.58e-11	1/0d	BC	AREG	up
1.44e-11	1.47256	0.5	0.31	2.04e-07	1/0d	BC	S100A2	up
9.97e-136	4.54988	1	0.442	1.41e-131	3/1d	BC	KRT14	up
1.94e-119	4.13321	0.885	0.019	2.75e-115	3/1d	BC	VIM	up
4e-115	2.15556	0.99	0.803	5.67e-111	3/1d	BC	TMSB10	up
2.62e-110	3.21074	0.831	0	3.71e-106	3/1d	BC	RBP1	up
2.56e-107	3.10161	0.935	0.25	3.63e-103	3/1d	BC	IFI27	up
5.35e-104	2.15897	0.996	0.853	7.58e-100	3/1d	BC	CXCL14	up
1.43e-98	1.55504	0.994	0.853	2.02e-94	3/1d	BC	B2M	up
3.77e-97	2.26207	0.923	0.278	5.34e-93	3/1d	BC	NDUFA4L2	up
4.56e-95	2.74909	0.792	0.042	6.47e-91	3/1d	BC	TGM2	up
8.43e-95	2.18547	0.915	0.278	1.19e-90	3/1d	BC	DYNLL1	up
9.72e-95	2.92551	0.942	0.35	1.38e-90	3/1d	BC	KRT6A	up
1.65e-94	2.87257	0.787	0.042	2.34e-90	3/1d	BC	TPM1	up
1.74e-91	1.05084	1	1	2.46e-87	3/1d	BC	KRT5	up
9.64e-87	1.02008	0.998	0.967	1.37e-82	3/1d	BC	ENSMFAG00000043121	up
1.49e-85	2.19122	0.967	0.5	2.11e-81	3/1d	BC	S100A2	up
1.38e-78	2.66543	0.817	0.164	1.95e-74	3/1d	BC	KRT17	up
5.62e-78	2.23443	0.731	0.067	7.97e-74	3/1d	BC	CSTA	up
7.62e-74	1.5557	0.965	0.658	1.08e-69	3/1d	BC	DCN	up
5.68e-70	2.15575	0.94	0.586	8.06e-66	3/1d	BC	ENSMFAG00000000455	up
8.38e-70	1.07537	1	0.969	1.19e-65	3/1d	BC	IGFBP2	up
1.35e-67	1.0202	0.988	0.939	1.92e-63	3/1d	BC	ENSMFAG00000037514	up
5.87e-67	1.9347	0.867	0.367	8.33e-63	3/1d	BC	COL7A1	up
4.5e-62	2.02639	0.904	0.517	6.39e-58	3/1d	BC	ENSMFAG00000039068	up
2.54e-60	2.74777	0.617	0.061	3.6e-56	3/1d	BC	KRT16	up
2.75e-57	1.20837	0.958	0.7	3.9e-53	3/1d	BC	TXNDC17	up
9.53e-57	1.33717	0.95	0.686	1.35e-52	3/1d	BC	HSPB1	up
6.34e-55	1.97715	0.515	0.008	8.99e-51	3/1d	BC	TAGLN	up
1.47e-52	1.80009	0.848	0.417	2.09e-48	3/1d	BC	ENSMFAG00000039064	up
1.26e-51	1.73564	0.523	0.028	1.78e-47	3/1d	BC	ATP1B1	up
2.06e-51	1.5636	0.783	0.294	2.93e-47	3/1d	BC	NPC2	up
5.55e-50	1.01729	0.96	0.814	7.87e-46	3/1d	BC	EEF1B2	up
1.84e-48	1.72668	0.59	0.1	2.61e-44	3/1d	BC	TIMP3	up
4.2e-48	1.01038	0.973	0.756	5.95e-44	3/1d	BC	ENSMFAG00000000984	up
1.23e-44	1.88905	0.462	0.022	1.74e-40	3/1d	BC	GPNMB	up
5.17e-44	1.26296	0.85	0.483	7.33e-40	3/1d	BC	CSRP2	up
1.74e-42	1.35914	0.725	0.272	2.47e-38	3/1d	BC	ENSMFAG00000000580	up
5.96e-39	1.27559	0.677	0.217	8.45e-35	3/1d	BC	EVPL	up
2.56e-38	1.28105	0.796	0.456	3.63e-34	3/1d	BC	S100A16	up
2.91e-37	1.31771	0.483	0.069	4.12e-33	3/1d	BC	FXYD5	up
6.49e-37	1.1081	0.865	0.539	9.2e-33	3/1d	BC	ENSMFAG00000001369	up
6.17e-36	1.32893	0.394	0.019	8.75e-32	3/1d	BC	SLC38A5	up
4.74e-35	1.25576	0.61	0.192	6.72e-31	3/1d	BC	CD151	up
8.96e-34	1.34659	0.517	0.119	1.27e-29	3/1d	BC	CALD1	up
1.56e-33	1.46482	0.35	0.008	2.21e-29	3/1d	BC	IGFBP5	up
2.59e-33	1.18571	0.498	0.097	3.67e-29	3/1d	BC	LIMK2	up
3.12e-31	1.3195	0.458	0.083	4.43e-27	3/1d	BC	IFI6	up
3.47e-31	1.46168	0.404	0.05	4.93e-27	3/1d	BC	ENSMFAG00000036985	up
4.56e-31	1.69854	0.362	0.028	6.47e-27	3/1d	BC	KRT7	up
4.72e-30	2.132	0.302	0	6.69e-26	3/1d	BC	FN1	up
1.33e-29	1.17851	0.6	0.217	1.88e-25	3/1d	BC	ITGAV	up
3.38e-29	1.16133	0.519	0.136	4.8e-25	3/1d	BC	LAMB1	up
6.97e-29	1.03114	0.64	0.236	9.89e-25	3/1d	BC	CAPG	up
2.26e-28	1.31924	0.452	0.097	3.21e-24	3/1d	BC	ENSMFAG00000041011	up
2.59e-28	1.05697	0.681	0.272	3.67e-24	3/1d	BC	ENSMFAG00000037375	up
5.44e-28	1.12857	0.283	0	7.71e-24	3/1d	BC	CCDC80	up
7.21e-28	1.06106	0.369	0.042	1.02e-23	3/1d	BC	TENM2	up
4.34e-27	1.55906	0.275	0	6.16e-23	3/1d	BC	APOE	up
4.72e-26	1.13351	0.319	0.025	6.7e-22	3/1d	BC	PTN	up
7.09e-26	1.08081	0.485	0.142	1.01e-21	3/1d	BC	S100A13	up
1.18e-25	1.04965	0.383	0.067	1.67e-21	3/1d	BC	ITGB6	up
4.05e-25	1.01188	0.281	0.011	5.74e-21	3/1d	BC	PALLD	up
5.22e-25	1.03178	0.458	0.119	7.4e-21	3/1d	BC	ECM1	up
3.03e-24	1.01111	0.383	0.075	4.3e-20	3/1d	BC	BST2	up
5.16e-22	1.0704	0.444	0.133	7.31e-18	3/1d	BC	SNAI2	up
6.51e-18	1.04457	0.192	0.003	9.24e-14	3/1d	BC	CYP1B1	up
8.76e-15	1.26739	0.306	0.083	1.24e-10	3/1d	BC	KRT19	up
2.37e-13	1.32338	0.475	0.244	3.36e-09	3/1d	BC	LY6D	up
7.08e-147	4.97499	0.942	0.019	1e-142	3/0d	BC	KRT6A	up
1.01e-146	4.4488	1	0.418	1.43e-142	3/0d	BC	KRT14	up
9.65e-140	3.08309	0.99	0.627	1.37e-135	3/0d	BC	TMSB10	up
1.11e-133	4.17706	0.885	0.012	1.57e-129	3/0d	BC	VIM	up
3.65e-132	3.66378	0.967	0.31	5.18e-128	3/0d	BC	S100A2	up
5.09e-123	3.21074	0.831	0	7.22e-119	3/0d	BC	RBP1	up
1.4e-120	1.78973	0.998	0.94	1.99e-116	3/0d	BC	ACTG1	up
1.56e-109	1.51814	0.988	0.904	2.21e-105	3/0d	BC	ENSMFAG00000037514	up
1.25e-103	2.72445	0.863	0.166	1.77e-99	3/0d	BC	LAMC2	up
9.24e-100	2.60188	0.792	0.07	1.31e-95	3/0d	BC	TGM2	up
1.29e-98	2.98362	0.817	0.099	1.84e-94	3/0d	BC	KRT17	up
5.87e-97	2.43903	0.869	0.216	8.33e-93	3/0d	BC	PLAU	up
5.04e-89	1.40105	0.992	0.844	7.15e-85	3/0d	BC	SFN	up
2.78e-87	1.84473	0.915	0.368	3.95e-83	3/0d	BC	DYNLL1	up
2.07e-86	1.62128	0.958	0.589	2.94e-82	3/0d	BC	TXNDC17	up
3.03e-84	1.21113	0.994	0.899	4.29e-80	3/0d	BC	B2M	up
4.52e-84	2.15679	0.796	0.171	6.41e-80	3/0d	BC	S100A16	up
3.73e-79	1.68614	0.923	0.416	5.28e-75	3/0d	BC	NDUFA4L2	up
1.15e-75	1.98412	0.731	0.113	1.64e-71	3/0d	BC	CSTA	up
3.23e-74	2.88061	0.617	0.024	4.58e-70	3/0d	BC	KRT16	up
6.72e-72	1.81806	0.935	0.55	9.53e-68	3/0d	BC	IFI27	up
1.35e-70	2.07674	0.787	0.212	1.91e-66	3/0d	BC	TPM1	up
7.04e-70	1.24704	0.954	0.733	9.99e-66	3/0d	BC	ENSMFAG00000029971	up
2e-68	1.53977	0.904	0.471	2.83e-64	3/0d	BC	S100A14	up
2.19e-68	1.08961	0.973	0.825	3.1e-64	3/0d	BC	ENSMFAG00000030460	up
5.28e-67	1.32721	0.95	0.721	7.49e-63	3/0d	BC	ENSMFAG00000001552	up
3.66e-64	1.02148	0.965	0.863	5.19e-60	3/0d	BC	RPS16	up
8.78e-62	1.01235	0.975	0.817	1.24e-57	3/0d	BC	RPL28	up
9.35e-62	1.97767	0.515	0.01	1.33e-57	3/0d	BC	TAGLN	up
1.82e-59	1.1116	0.944	0.707	2.59e-55	3/0d	BC	ENSMFAG00000032199	up
1.88e-58	1.07404	0.96	0.796	2.67e-54	3/0d	BC	EEF1B2	up
3.78e-57	1.704	0.523	0.029	5.36e-53	3/0d	BC	ATP1B1	up
1.12e-56	1.03745	0.963	0.726	1.59e-52	3/0d	BC	ENSMFAG00000037250	up
6.01e-55	1.00351	0.96	0.772	8.53e-51	3/0d	BC	ENSMFAG00000003858	up
2.39e-51	1.44999	0.783	0.327	3.39e-47	3/0d	BC	NPC2	up
4.83e-49	1.37615	0.606	0.125	6.85e-45	3/0d	BC	ENSMFAG00000003078	up
8.91e-49	1.00622	0.948	0.748	1.26e-44	3/0d	BC	ARPC2	up
1.09e-48	1.63979	0.729	0.281	1.55e-44	3/0d	BC	CTSL	up
4.84e-47	1.3907	0.833	0.469	6.87e-43	3/0d	BC	LAMA3	up
2.96e-46	1.52909	0.452	0.031	4.19e-42	3/0d	BC	CLIC4	up
2.04e-44	1.24715	0.808	0.416	2.89e-40	3/0d	BC	ENSMFAG00000040595	up
4.62e-44	1.37029	0.483	0.058	6.55e-40	3/0d	BC	FXYD5	up
7.41e-44	1.4366	0.458	0.048	1.05e-39	3/0d	BC	ECM1	up
1.82e-43	1.358	0.383	0.005	2.58e-39	3/0d	BC	ITGB6	up
2.03e-43	1.42508	0.383	0.005	2.88e-39	3/0d	BC	SERPINE2	up
5.16e-40	2.034	0.469	0.07	7.32e-36	3/0d	BC	MMP1	up
6.46e-39	1.39947	0.94	0.827	9.16e-35	3/0d	BC	ENSMFAG00000000455	up
8.79e-38	1.01581	0.848	0.534	1.25e-33	3/0d	BC	PGAM1	up
2.24e-37	1.05238	0.825	0.474	3.17e-33	3/0d	BC	ARPC1B	up
1.13e-35	1.24366	0.531	0.13	1.61e-31	3/0d	BC	GEM	up
1.5e-35	1.11451	0.773	0.411	2.13e-31	3/0d	BC	FHL2	up
2.64e-35	1.17757	0.635	0.243	3.74e-31	3/0d	BC	RHOD	up
3.71e-35	1.13913	0.867	0.611	5.26e-31	3/0d	BC	COL7A1	up
5.25e-35	1.75965	0.362	0.029	7.44e-31	3/0d	BC	KRT7	up
2.29e-34	1.02442	0.844	0.519	3.25e-30	3/0d	BC	CD44	up
3.75e-34	1.08524	0.823	0.478	5.32e-30	3/0d	BC	ITGB1	up
4.26e-34	2.132	0.302	0	6.04e-30	3/0d	BC	FN1	up
8.16e-34	1.25086	0.517	0.142	1.16e-29	3/0d	BC	ENSMFAG00000031981	up
1.47e-33	1.36663	0.452	0.089	2.08e-29	3/0d	BC	ENSMFAG00000041011	up
7.09e-33	1.0433	0.696	0.308	1.01e-28	3/0d	BC	ENSMFAG00000002167	up
1.69e-32	1.15104	0.394	0.05	2.4e-28	3/0d	BC	SLC38A5	up
2.71e-32	1.16701	0.6	0.207	3.85e-28	3/0d	BC	ITGAV	up
4.91e-32	1.91782	0.475	0.125	6.96e-28	3/0d	BC	LY6D	up
5.83e-32	1.1876	0.625	0.255	8.27e-28	3/0d	BC	ENSMFAG00000045648	up
1.18e-31	1.17807	0.59	0.209	1.68e-27	3/0d	BC	TIMP3	up
1.85e-31	1.12814	0.485	0.13	2.62e-27	3/0d	BC	S100A13	up
4.56e-31	1.19308	0.308	0.014	6.47e-27	3/0d	BC	F3	up
6.25e-31	1.07314	0.281	0.002	8.86e-27	3/0d	BC	PALLD	up
8.59e-31	1.21666	0.565	0.202	1.22e-26	3/0d	BC	THBS1	up
1.02e-30	1.00002	0.729	0.401	1.45e-26	3/0d	BC	RPL37A	up
2.18e-30	1.24219	0.319	0.024	3.09e-26	3/0d	BC	PMEPA1	up
2.54e-30	1.14826	0.546	0.178	3.6e-26	3/0d	BC	HSPH1	up
2.78e-30	1.09434	0.283	0.005	3.95e-26	3/0d	BC	CCDC80	up
4.37e-30	1.45423	0.398	0.072	6.2e-26	3/0d	BC	ENSMFAG00000037676	up
1.66e-28	1.27062	0.35	0.048	2.35e-24	3/0d	BC	IGFBP5	up
1.9e-28	1.01561	0.39	0.072	2.69e-24	3/0d	BC	CLCA2	up
2.01e-28	1.15665	0.26	0.002	2.85e-24	3/0d	BC	MMP10	up
6.38e-28	1.04901	0.56	0.207	9.05e-24	3/0d	BC	SPTBN1	up
1.04e-26	1.15373	0.594	0.255	1.48e-22	3/0d	BC	LYNX1-SLURP2	up
3.11e-26	1.06425	0.648	0.31	4.41e-22	3/0d	BC	SNCG	up
1.96e-25	1.53013	0.296	0.031	2.78e-21	3/0d	BC	KRT24	up
2.62e-25	1.1255	0.904	0.781	3.72e-21	3/0d	BC	ENSMFAG00000039068	up
2.63e-25	1.04733	0.388	0.087	3.72e-21	3/0d	BC	ENSMFAG00000038147	up
2.17e-23	1.32259	0.275	0.029	3.08e-19	3/0d	BC	APOE	up
2.29e-23	1.04172	0.44	0.144	3.25e-19	3/0d	BC	PHLDA2	up
1.31e-20	1.0651	0.458	0.173	1.86e-16	3/0d	BC	IFI6	up
2.63e-20	1.03496	0.192	0.002	3.73e-16	3/0d	BC	CYP1B1	up
1.24e-19	1.09614	0.404	0.135	1.76e-15	3/0d	BC	ENSMFAG00000036985	up
7.64e-17	1.02696	0.462	0.209	1.08e-12	3/0d	BC	GPNMB	up
7.21e-11	3.16085	1	0.062	1.02e-06	1/0d	TAC	CYP26B1	up
1.24e-09	3.18638	1	0.25	1.76e-05	1/0d	TAC	CTSL	up
2.84e-09	2.73484	1	0.188	4.03e-05	1/0d	TAC	PLAU	up
5.14e-09	2.73079	0.944	0.219	7.29e-05	1/0d	TAC	ENSMFAG00000045648	up
6.22e-09	2.50838	1	1	8.82e-05	1/0d	TAC	SFN	up
4.09e-08	2.73325	1	0.562	0.000579759	1/0d	TAC	PTGS2	up
5.41e-08	3.0683	0.722	0	0.000766974	1/0d	TAC	KRT6A	up
2.16e-07	2.5818	0.889	0.219	0.00306298	1/0d	TAC	SERPINB1	up
3.72e-07	2.39068	0.833	0.125	0.00527501	1/0d	TAC	PHLDA2	up
1.23e-06	1.91596	0.889	0.25	0.0174615	1/0d	TAC	GJB4	up
1.28e-06	1.80991	1	0.844	0.018144	1/0d	TAC	ENSMFAG00000000085	up
3.28e-11	4.46796	1	0.556	4.65e-07	3/1d	TAC	KRT14	up
5.74e-10	2.13044	0.988	0.944	8.15e-06	3/1d	TAC	TMSB10	up
2.72e-09	2.6779	1	0.667	3.86e-05	3/1d	TAC	S100A2	up
2.87e-09	1.82065	1	0.667	4.07e-05	3/1d	TAC	TXNDC17	up
3.56e-09	1.34711	1	1	5.06e-05	3/1d	TAC	ENSMFAG00000037514	up
6.44e-09	2.13198	0.988	0.5	9.13e-05	3/1d	TAC	S100A16	up
7.08e-09	1.12636	0.988	1	0.000100359	3/1d	TAC	RPL28	up
1.31e-08	1.789	0.988	0.667	0.000185886	3/1d	TAC	ENSMFAG00000038633	up
1.58e-08	3.22603	0.857	0.056	0.000224309	3/1d	TAC	CSTA	up
5.51e-08	2.98122	0.988	0.722	0.000780939	3/1d	TAC	KRT6A	up
5.92e-08	4.2086	0.821	0.056	0.000839054	3/1d	TAC	KRT16	up
7.59e-08	1.10443	1	1	0.0010769	3/1d	TAC	KRT5	up
7.76e-08	1.47425	0.988	0.722	0.0011002	3/1d	TAC	DYNLL1	up
9.92e-08	3.07588	0.786	0	0.00140742	3/1d	TAC	RBP1	up
1.17e-07	1.04148	1	1	0.00166468	3/1d	TAC	RPS12	up
2.47e-07	1.82469	0.94	0.333	0.00349809	3/1d	TAC	NDUFA4L2	up
3.49e-07	2.85978	0.798	0.111	0.00495129	3/1d	TAC	TPM1	up
6.8e-07	1.59683	0.964	0.556	0.00964051	3/1d	TAC	DCN	up
7.23e-07	1.0019	0.988	1	0.010248	3/1d	TAC	ENSMFAG00000030460	up
1e-06	2.34952	0.952	0.444	0.0142094	3/1d	TAC	ENSMFAG00000000455	up
1.71e-06	1.25994	0.964	0.722	0.024231	3/1d	TAC	ENSMFAG00000043579	up
3.45e-06	1.39762	0.964	0.556	0.0489195	3/1d	TAC	ENSMFAG00000040595	up
1.08e-16	6.04952	0.988	0	1.53e-12	3/0d	TAC	KRT6A	up
2.2e-16	3.26239	1	0.625	3.12e-12	3/0d	TAC	KRT14	up
2.27e-16	2.594	1	0.469	3.22e-12	3/0d	TAC	TXNDC17	up
3.73e-16	3.87254	1	0.531	5.29e-12	3/0d	TAC	S100A2	up
8e-15	2.35885	0.988	0.5	1.14e-10	3/0d	TAC	S100A16	up
8.81e-15	1.77772	1	1	1.25e-10	3/0d	TAC	ENSMFAG00000037514	up
1.3e-14	2.20229	0.988	0.938	1.84e-10	3/0d	TAC	TMSB10	up
1.36e-14	1.28106	1	0.969	1.93e-10	3/0d	TAC	S100A6	up
1.02e-11	1.08181	0.988	1	1.44e-07	3/0d	TAC	RPL28	up
1.06e-11	3.07588	0.786	0	1.51e-07	3/0d	TAC	RBP1	up
1.31e-11	1.53124	0.964	0.875	1.86e-07	3/0d	TAC	ENSMFAG00000043579	up
1.61e-11	4.102	0.821	0.062	2.28e-07	3/0d	TAC	KRT16	up
1.91e-11	3.58262	0.774	0	2.71e-07	3/0d	TAC	VIM	up
2.26e-11	1.83572	0.964	0.469	3.2e-07	3/0d	TAC	ENSMFAG00000040595	up
3.31e-11	2.71249	0.857	0.25	4.69e-07	3/0d	TAC	CSTA	up
7.13e-11	1.36765	0.988	0.781	1.01e-06	3/0d	TAC	DYNLL1	up
1.59e-10	2.1472	0.988	0.938	2.26e-06	3/0d	TAC	ENSMFAG00000001552	up
2.71e-10	1.38897	0.964	0.688	3.85e-06	3/0d	TAC	PGAM1	up
3.48e-10	2.92748	0.833	0.219	4.93e-06	3/0d	TAC	KRT17	up
4.86e-10	1.07572	1	0.969	6.9e-06	3/0d	TAC	ENSMFAG00000033495	up
1.55e-09	1.23086	0.952	0.875	2.2e-05	3/0d	TAC	RPS29	up
1.56e-09	1.59544	0.94	0.531	2.21e-05	3/0d	TAC	SERPINB5	up
1.72e-09	2.34644	0.714	0.062	2.44e-05	3/0d	TAC	ENSMFAG00000037676	up
2.28e-09	1.07747	0.988	1	3.24e-05	3/0d	TAC	RPL18A	up
3.59e-09	1.03902	1	1	5.09e-05	3/0d	TAC	SFN	up
4.53e-09	1.85645	0.905	0.688	6.42e-05	3/0d	TAC	S100A14	up
2.87e-08	2.15252	0.607	0	0.000407296	3/0d	TAC	TGM2	up
3.39e-08	1.12639	0.988	0.812	0.000481281	3/0d	TAC	HSP90AB1	up
4.21e-08	1.33991	0.929	0.594	0.000596999	3/0d	TAC	ARPC1B	up
4.72e-08	1.0842	0.964	0.844	0.00066984	3/0d	TAC	ENSMFAG00000036866	up
8.68e-08	1.36444	0.845	0.312	0.00123169	3/0d	TAC	ENSMFAG00000037878	up
9.79e-08	1.01677	0.952	0.75	0.0013878	3/0d	TAC	ATP5F1E	up
2.56e-07	1.30249	0.702	0.125	0.00362866	3/0d	TAC	APRT	up
2.88e-07	1.19317	0.893	0.469	0.00408287	3/0d	TAC	ENSMFAG00000002167	up
3.67e-07	2.06392	0.798	0.312	0.00519992	3/0d	TAC	TPM1	up
3.87e-07	1.24719	0.976	0.844	0.00549502	3/0d	TAC	CSTB	up
4.09e-07	1.12649	0.869	0.438	0.00579978	3/0d	TAC	ENSMFAG00000039785	up
6.92e-07	2.21783	0.655	0.156	0.00981739	3/0d	TAC	LAMC2	up
9.46e-07	2.72407	0.583	0.062	0.0134099	3/0d	TAC	LY6D	up
1.03e-06	1.75686	0.69	0.188	0.0146096	3/0d	TAC	PLAU	up
1.3e-06	1.54791	0.833	0.594	0.0184672	3/0d	TAC	SPARC	up
1.49e-06	1.47009	0.762	0.312	0.0210619	3/0d	TAC	ITGB1	up
2.88e-06	1.0692	0.905	0.531	0.0409148	3/0d	TAC	PRDX1	up
2.85e-220	-2.52461	0.208	0.863	4.04e-216	1/0d	TDCE	CYP26A1	down
1.51e-212	-2.37888	0.335	0.905	2.15e-208	1/0d	TDCE	NR4A1	down
1.99e-202	-1.6549	0.797	0.993	2.83e-198	1/0d	TDCE	FOS	down
3.4e-200	-1.97506	0.086	0.737	4.83e-196	1/0d	TDCE	LAMB1	down
1.27e-189	-1.9947	0.529	0.93	1.8e-185	1/0d	TDCE	CSRP2	down
8.56e-184	-1.33419	0.8	0.979	1.21e-179	1/0d	TDCE	ERICH5	down
7.2e-182	-2.75612	0.026	0.607	1.02e-177	1/0d	TDCE	PCK1	down
4.78e-173	-2.07809	0.601	0.916	6.77e-169	1/0d	TDCE	MT1X	down
7.66e-166	-1.77996	0.34	0.854	1.09e-161	1/0d	TDCE	CEBPD	down
1.54e-165	-2.06517	0.004	0.529	2.18e-161	1/0d	TDCE	TXNIP	down
4.39e-164	-1.63219	0.066	0.643	6.22e-160	1/0d	TDCE	LGR4	down
2.96e-135	-1.40344	0.342	0.829	4.2e-131	1/0d	TDCE	STK35	down
3.91e-134	-1.553	0.198	0.715	5.54e-130	1/0d	TDCE	HLF	down
2.58e-132	-1.90991	0.302	0.788	3.66e-128	1/0d	TDCE	CXCL14	down
1.25e-129	-1.36441	0.369	0.836	1.77e-125	1/0d	TDCE	EVPL	down
7.37e-128	-1.00459	0.845	0.978	1.05e-123	1/0d	TDCE	ENSMFAG00000032893	down
1e-127	-1.45696	0.562	0.874	1.42e-123	1/0d	TDCE	ENSMFAG00000032662	down
1.56e-123	-1.57089	0.323	0.785	2.22e-119	1/0d	TDCE	DST	down
1.09e-120	-1.42276	0.365	0.835	1.55e-116	1/0d	TDCE	EGR1	down
1.31e-120	-1.18369	0.628	0.925	1.85e-116	1/0d	TDCE	ENSMFAG00000039068	down
8.17e-120	-1.32565	0.065	0.525	1.16e-115	1/0d	TDCE	DBP	down
3.87e-116	-1.57347	0.235	0.7	5.48e-112	1/0d	TDCE	SOD3	down
5.29e-115	-1.57564	0.296	0.755	7.51e-111	1/0d	TDCE	HES1	down
1.01e-114	-1.1221	0.574	0.917	1.43e-110	1/0d	TDCE	ENSMFAG00000000455	down
1.32e-114	-1.44815	0.526	0.864	1.87e-110	1/0d	TDCE	BTG2	down
1.12e-113	-1.12793	0.549	0.901	1.58e-109	1/0d	TDCE	FGFR3	down
3.21e-112	-1.25465	0.625	0.901	4.55e-108	1/0d	TDCE	UACA	down
1.84e-111	-1.39313	0.067	0.505	2.61e-107	1/0d	TDCE	ENSMFAG00000030485	down
1.47e-109	-1.28496	0.18	0.663	2.08e-105	1/0d	TDCE	TRIM36	down
3.66e-109	-1.31578	0.701	0.943	5.2e-105	1/0d	TDCE	DUSP1	down
2.8e-108	-1.27406	0.086	0.531	3.97e-104	1/0d	TDCE	ST3GAL4	down
4.01e-108	-1.30615	0.257	0.716	5.68e-104	1/0d	TDCE	PDCD4	down
1.75e-103	-1.33618	0.11	0.556	2.48e-99	1/0d	TDCE	ENSMFAG00000032548	down
2.25e-103	-1.38504	0.238	0.692	3.19e-99	1/0d	TDCE	TSC22D1	down
6.37e-103	-1.25008	0.57	0.905	9.04e-99	1/0d	TDCE	ATF3	down
7.14e-102	-1.1525	0.047	0.452	1.01e-97	1/0d	TDCE	MEIS1	down
1.06e-100	-1.28622	0.04	0.432	1.5e-96	1/0d	TDCE	SEMA4A	down
8.11e-100	-1.00984	0.585	0.927	1.15e-95	1/0d	TDCE	PAX6	down
1.98e-98	-3.15093	0.025	0.391	2.81e-94	1/0d	TDCE	KRT15	down
3.34e-98	-1.24424	0.144	0.584	4.73e-94	1/0d	TDCE	RIPK4	down
8.26e-97	-1.19946	0.085	0.502	1.17e-92	1/0d	TDCE	ENSMFAG00000005679	down
1.81e-94	-1.17583	0.101	0.517	2.56e-90	1/0d	TDCE	TNFSF10	down
7.89e-94	-1.27145	0.166	0.597	1.12e-89	1/0d	TDCE	SLC23A2	down
1.97e-91	-1.0766	0.038	0.403	2.8e-87	1/0d	TDCE	KIT	down
3.15e-90	-1.04426	0.646	0.925	4.46e-86	1/0d	TDCE	MT3	down
1.97e-89	-1.06088	0.569	0.882	2.79e-85	1/0d	TDCE	GLUL	down
6.91e-87	-1.16986	0.31	0.733	9.8e-83	1/0d	TDCE	PIM3	down
9.1e-86	-1.06095	0.209	0.639	1.29e-81	1/0d	TDCE	DMRTA2	down
6.8e-82	-1.0797	0.058	0.413	9.65e-78	1/0d	TDCE	KITLG	down
4.23e-81	-3.07927	0.095	0.449	5.99e-77	1/0d	TDCE	ENSMFAG00000032417	down
6.39e-80	-1.20306	0.23	0.622	9.06e-76	1/0d	TDCE	ZNF750	down
6.68e-80	-1.0084	0.066	0.421	9.47e-76	1/0d	TDCE	IL20RB	down
9.4e-80	-1.04619	0.387	0.773	1.33e-75	1/0d	TDCE	BHLHE40	down
8.04e-75	-1.03987	0.118	0.484	1.14e-70	1/0d	TDCE	MYLIP	down
1.75e-69	-1.01733	0.378	0.725	2.48e-65	1/0d	TDCE	TOM1L1	down
1.36e-67	-1.12991	0.322	0.705	1.93e-63	1/0d	TDCE	AQP3	down
4.75e-60	-1.00147	0.197	0.536	6.73e-56	1/0d	TDCE	EFNA1	down
2.09e-58	-1.02972	0.171	0.506	2.97e-54	1/0d	TDCE	RHOB	down
7.99e-55	-1.1528	0.189	0.498	1.13e-50	1/0d	TDCE	NR4A2	down
4.27e-53	-1.03548	0.5	0.783	6.05e-49	1/0d	TDCE	GADD45B	down
7.57e-45	-1.20717	0.172	0.439	1.07e-40	1/0d	TDCE	LGALSL	down
2.14e-43	-1.01107	0.163	0.43	3.04e-39	1/0d	TDCE	SOCS3	down
2.46e-39	-1.08379	0.492	0.705	3.49e-35	1/0d	TDCE	ENSMFAG00000039064	down
3.44e-39	-1.19315	0.136	0.382	4.88e-35	1/0d	TDCE	IGFBP2	down
3.97e-39	-2.50326	0.057	0.257	5.63e-35	1/0d	TDCE	KRT19	down
1.83e-12	-1.10349	0.035	0.113	2.6e-08	1/0d	TDCE	KRT4	down
2.03e-230	-2.09435	0.966	0.994	2.88e-226	3/1d	TDCE	SAT1	down
1.74e-221	-2.21114	0.645	0.97	2.47e-217	3/1d	TDCE	CRTAC1	down
1.08e-206	-1.32096	0.996	0.989	1.53e-202	3/1d	TDCE	SFN	down
2.09e-199	-2.32966	0.793	0.962	2.96e-195	3/1d	TDCE	CTSL	down
1.33e-193	-1.11212	0.993	0.987	1.89e-189	3/1d	TDCE	EIF1	down
1.27e-190	-1.5553	0.98	1	1.8e-186	3/1d	TDCE	FTH1	down
2.43e-166	-2.26315	0.535	0.905	3.45e-162	3/1d	TDCE	ENSMFAG00000044185	down
8.61e-155	-1.26395	0.919	0.953	1.22e-150	3/1d	TDCE	EIF4A1	down
1.23e-149	-2.06203	0.298	0.799	1.75e-145	3/1d	TDCE	ENSMFAG00000045648	down
2.39e-148	-1.29556	0.918	0.948	3.38e-144	3/1d	TDCE	YBX3	down
1.02e-144	-1.50673	0.953	0.966	1.44e-140	3/1d	TDCE	TACSTD2	down
1.53e-139	-1.43306	0.795	0.936	2.17e-135	3/1d	TDCE	CLDN7	down
6.8e-137	-2.24637	0.163	0.717	9.65e-133	3/1d	TDCE	ITGA2	down
2e-117	-1.54334	0.632	0.866	2.84e-113	3/1d	TDCE	PTP4A1	down
3.46e-114	-2.54894	0.137	0.646	4.91e-110	3/1d	TDCE	MT3	down
1.21e-110	-1.35185	0.723	0.892	1.72e-106	3/1d	TDCE	LMO7	down
3.5e-108	-2.14169	0.103	0.601	4.97e-104	3/1d	TDCE	CYP26B1	down
1.71e-107	-1.78427	0.177	0.653	2.43e-103	3/1d	TDCE	ISG20	down
2.66e-105	-1.38997	0.553	0.824	3.77e-101	3/1d	TDCE	ATF4	down
3.62e-102	-1.38492	0.83	0.908	5.13e-98	3/1d	TDCE	CLDN4	down
3.62e-101	-1.80816	0.252	0.678	5.14e-97	3/1d	TDCE	ENSMFAG00000000419	down
1.02e-99	-1.11862	0.914	0.938	1.44e-95	3/1d	TDCE	TUBB2A	down
1.1e-94	-1.32246	0.796	0.973	1.56e-90	3/1d	TDCE	APOBEC3A	down
1.44e-90	-1.18938	0.87	0.942	2.04e-86	3/1d	TDCE	SERPINB1	down
2.96e-88	-1.04388	0.847	0.932	4.2e-84	3/1d	TDCE	CTSV	down
5.3e-88	-1.38684	0.421	0.734	7.51e-84	3/1d	TDCE	CLDND1	down
1.21e-82	-1.21537	0.716	0.853	1.72e-78	3/1d	TDCE	EMP2	down
2.72e-76	-1.37535	0.228	0.599	3.85e-72	3/1d	TDCE	BAG1	down
8.77e-73	-1.29103	0.586	0.83	1.24e-68	3/1d	TDCE	CD55	down
7.62e-71	-1.22995	0.505	0.738	1.08e-66	3/1d	TDCE	MAST4	down
5.93e-70	-1.0232	0.649	0.862	8.41e-66	3/1d	TDCE	DAPL1	down
8.6e-68	-1.11491	0.645	0.824	1.22e-63	3/1d	TDCE	ASPH	down
1.2e-64	-1.02805	0.62	0.806	1.7e-60	3/1d	TDCE	CD63	down
7.12e-64	-1.35637	0.17	0.521	1.01e-59	3/1d	TDCE	TFRC	down
1.39e-62	-1.11578	0.815	0.874	1.97e-58	3/1d	TDCE	CLDN1	down
1.98e-61	-1.34169	0.204	0.544	2.81e-57	3/1d	TDCE	B4GALT5	down
2.3e-61	-1.53762	0.092	0.444	3.26e-57	3/1d	TDCE	MUC22	down
8.86e-59	-1.18522	0.709	0.833	1.26e-54	3/1d	TDCE	ENSMFAG00000044835	down
3.67e-58	-1.07934	0.39	0.656	5.2e-54	3/1d	TDCE	DDX3X	down
4.01e-58	-1.08414	0.549	0.731	5.68e-54	3/1d	TDCE	ARF6	down
1.75e-57	-1.19861	0.286	0.587	2.49e-53	3/1d	TDCE	IFNGR2	down
1.06e-56	-1.10141	0.537	0.72	1.51e-52	3/1d	TDCE	TOP1	down
9.46e-56	-1.1157	0.386	0.634	1.34e-51	3/1d	TDCE	HNRNPAB	down
9.97e-56	-1.05231	0.689	0.817	1.41e-51	3/1d	TDCE	ENSMFAG00000031087	down
6.37e-55	-1.18243	0.233	0.533	9.04e-51	3/1d	TDCE	CAMSAP2	down
1.27e-52	-1.12526	0.281	0.556	1.8e-48	3/1d	TDCE	PBDC1	down
6.29e-52	-1.09212	0.579	0.752	8.91e-48	3/1d	TDCE	CD109	down
6.61e-52	-1.20221	0.236	0.535	9.38e-48	3/1d	TDCE	MT-ND6	down
6.98e-52	-1.17481	0.293	0.572	9.9e-48	3/1d	TDCE	IL6ST	down
1.23e-51	-1.25755	0.306	0.572	1.74e-47	3/1d	TDCE	CBR1	down
2.04e-51	-1.00046	0.802	0.853	2.89e-47	3/1d	TDCE	GJB4	down
3.52e-51	-1.0562	0.313	0.571	5e-47	3/1d	TDCE	EIF1B	down
5.04e-49	-1.0663	0.403	0.629	7.15e-45	3/1d	TDCE	DNAJA2	down
1.43e-48	-1.11865	0.246	0.529	2.03e-44	3/1d	TDCE	BCL10	down
2.01e-47	-1.14188	0.188	0.48	2.85e-43	3/1d	TDCE	ST3GAL6	down
2.82e-46	-1.14488	0.165	0.459	4e-42	3/1d	TDCE	SLC6A6	down
1.35e-43	-1.05157	0.178	0.451	1.92e-39	3/1d	TDCE	TSTD1	down
8.53e-43	-1.03015	0.291	0.555	1.21e-38	3/1d	TDCE	PRNP	down
1.74e-42	-1.00871	0.354	0.605	2.47e-38	3/1d	TDCE	MDM2	down
2.46e-41	-1.29149	0.062	0.327	3.49e-37	3/1d	TDCE	IGF2	down
2.14e-40	-1.12812	0.158	0.424	3.04e-36	3/1d	TDCE	TNNT3	down
8.03e-40	-1.11475	0.117	0.383	1.14e-35	3/1d	TDCE	AGR3	down
2.94e-38	-1.01585	0.388	0.597	4.18e-34	3/1d	TDCE	UGCG	down
2.55e-36	-1.20776	0.093	0.335	3.61e-32	3/1d	TDCE	ENSMFAG00000043037	down
3.69e-36	-1.19956	0.438	0.604	5.23e-32	3/1d	TDCE	THBS1	down
1.8e-34	-1.01144	0.107	0.342	2.55e-30	3/1d	TDCE	PHLDB2	down
2.7e-34	-1.0223	0.366	0.565	3.82e-30	3/1d	TDCE	NQO1	down
3.8e-31	-1.14288	0.644	0.732	5.39e-27	3/1d	TDCE	HSPA5	down
7.44e-30	-1.12049	0.399	0.574	1.05e-25	3/1d	TDCE	NFKBIA	down
5.28e-29	-1.04778	0.024	0.208	7.49e-25	3/1d	TDCE	CYP26A1	down
2.29e-26	-1.06424	0.355	0.529	3.25e-22	3/1d	TDCE	HBEGF	down
6e-26	-1.17	0.033	0.203	8.51e-22	3/1d	TDCE	FABP3	down
1.83e-25	-1.15955	0.112	0.313	2.6e-21	3/1d	TDCE	KRT23	down
1.6e-227	-3.5932	0.137	0.925	2.28e-223	3/0d	TDCE	MT3	down
1.87e-217	-3.57239	0.024	0.863	2.65e-213	3/0d	TDCE	CYP26A1	down
4.6e-203	-2.60282	0.645	0.964	6.53e-199	3/0d	TDCE	CRTAC1	down
1.03e-201	-2.00454	0.917	0.993	1.46e-197	3/0d	TDCE	FOS	down
7.77e-186	-1.51453	0.966	1	1.1e-181	3/0d	TDCE	SAT1	down
4.52e-176	-1.6349	0.98	1	6.41e-172	3/0d	TDCE	FTH1	down
2.67e-163	-1.13348	0.993	0.997	3.79e-159	3/0d	TDCE	ALDH1A1	down
7.45e-159	-2.1823	0.058	0.737	1.06e-154	3/0d	TDCE	LAMB1	down
1.4e-154	-2.35746	0.482	0.916	1.98e-150	3/0d	TDCE	MT1X	down
1.06e-151	-2.08745	0.334	0.854	1.5e-147	3/0d	TDCE	CEBPD	down
3.96e-150	-2.01867	0.566	0.93	5.62e-146	3/0d	TDCE	CSRP2	down
1.03e-144	-1.40155	0.939	0.984	1.46e-140	3/0d	TDCE	JUNB	down
3.72e-141	-2.0967	0.543	0.905	5.28e-137	3/0d	TDCE	NR4A1	down
6.18e-140	-1.37716	0.82	0.973	8.76e-136	3/0d	TDCE	ADH1B	down
2.14e-139	-1.22136	0.905	0.979	3.04e-135	3/0d	TDCE	ERICH5	down
7.06e-138	-1.80899	0.31	0.829	1e-133	3/0d	TDCE	STK35	down
2.29e-135	-2.90917	0	0.607	3.25e-131	3/0d	TDCE	PCK1	down
5.28e-129	-1.49664	0.649	0.942	7.49e-125	3/0d	TDCE	DAPL1	down
3.39e-127	-1.86158	0.137	0.715	4.8e-123	3/0d	TDCE	HLF	down
3.54e-116	-2.23174	0.062	0.623	5.02e-112	3/0d	TDCE	IGF2	down
1.03e-112	-1.61245	0.588	0.874	1.45e-108	3/0d	TDCE	ENSMFAG00000032662	down
2.95e-110	-1.37982	0.768	0.919	4.18e-106	3/0d	TDCE	IER2	down
3.78e-109	-1.8642	0.306	0.758	5.36e-105	3/0d	TDCE	CBR1	down
5.65e-108	-1.29781	0.645	0.921	8.01e-104	3/0d	TDCE	ASPH	down
5.42e-104	-1.1819	0.887	0.969	7.69e-100	3/0d	TDCE	KLF4	down
3.57e-99	-1.76138	0.249	0.7	5.06e-95	3/0d	TDCE	SOD3	down
5.67e-97	-1.09378	0.755	0.928	8.04e-93	3/0d	TDCE	ENSMFAG00000032635	down
6.14e-95	-1.42358	0.511	0.842	8.71e-91	3/0d	TDCE	RIDA	down
1.21e-94	-1.42284	0.815	0.943	1.71e-90	3/0d	TDCE	DUSP1	down
1.04e-93	-1.58332	0.399	0.785	1.47e-89	3/0d	TDCE	DST	down
2.31e-92	-1.17526	0.533	0.882	3.27e-88	3/0d	TDCE	GLUL	down
1.8e-88	-1.50573	0.182	0.636	2.56e-84	3/0d	TDCE	ADRB2	down
3.76e-87	-1.09812	0.822	0.957	5.33e-83	3/0d	TDCE	ELF3	down
4.21e-83	-1.81097	0.158	0.598	5.98e-79	3/0d	TDCE	TNNT3	down
5.83e-81	-1.40176	0.146	0.597	8.27e-77	3/0d	TDCE	SLC23A2	down
7.67e-80	-1.56848	0.446	0.788	1.09e-75	3/0d	TDCE	CXCL14	down
6.05e-79	-1.31795	0.249	0.66	8.58e-75	3/0d	TDCE	MARCHF6	down
5.88e-78	-1.69468	0.294	0.705	8.33e-74	3/0d	TDCE	AQP3	down
4.17e-77	-1.36233	0.158	0.571	5.91e-73	3/0d	TDCE	NR1D1	down
1.91e-76	-1.43262	0.315	0.692	2.71e-72	3/0d	TDCE	TSC22D1	down
1.26e-74	-1.24382	0.103	0.525	1.79e-70	3/0d	TDCE	DBP	down
3.5e-74	-1.38793	0.034	0.432	4.96e-70	3/0d	TDCE	SEMA4A	down
1.43e-71	-1.22524	0.017	0.395	2.03e-67	3/0d	TDCE	PDK3	down
1.86e-71	-1.20234	0.383	0.716	2.64e-67	3/0d	TDCE	PDCD4	down
5.87e-71	-1.03104	0.847	0.937	8.33e-67	3/0d	TDCE	CTSV	down
2.23e-70	-1.15334	0.454	0.762	3.16e-66	3/0d	TDCE	COMT	down
1.28e-69	-1.05816	0.512	0.799	1.82e-65	3/0d	TDCE	CIRBP	down
1.57e-69	-1.02369	0.868	0.932	2.23e-65	3/0d	TDCE	FOSB	down
5.31e-69	-1.03379	0.868	0.947	7.52e-65	3/0d	TDCE	ZFP36	down
2.4e-68	-1.22876	0.007	0.365	3.4e-64	3/0d	TDCE	LAMB4	down
4.2e-68	-1.27074	0.136	0.524	5.96e-64	3/0d	TDCE	ENSMFAG00000036124	down
4.04e-67	-1.35098	0.294	0.664	5.73e-63	3/0d	TDCE	EPAS1	down
1.55e-65	-1.17964	0.636	0.835	2.2e-61	3/0d	TDCE	EGR1	down
5.93e-63	-1.13416	0.085	0.458	8.41e-59	3/0d	TDCE	DAPK1	down
1.37e-58	-1.0488	0.003	0.315	1.95e-54	3/0d	TDCE	BBOX1	down
1.61e-57	-1.05266	0.076	0.422	2.29e-53	3/0d	TDCE	WNK2	down
6.49e-57	-1.06317	0.455	0.724	9.21e-53	3/0d	TDCE	XDH	down
3.56e-56	-1.06399	0.178	0.532	5.04e-52	3/0d	TDCE	TSTD1	down
7.11e-56	-1.09595	0.17	0.522	1.01e-51	3/0d	TDCE	TFRC	down
9.73e-56	-1.40284	0.092	0.43	1.38e-51	3/0d	TDCE	SOCS3	down
1.61e-55	-1.49135	0.185	0.529	2.28e-51	3/0d	TDCE	TXNIP	down
6.45e-55	-1.0656	0.325	0.643	9.15e-51	3/0d	TDCE	LGR4	down
7.84e-54	-1.12799	0.407	0.712	1.11e-49	3/0d	TDCE	ITGA6	down
3.89e-53	-1.05051	0.12	0.46	5.51e-49	3/0d	TDCE	PER3	down
8.97e-53	-1.05828	0.26	0.585	1.27e-48	3/0d	TDCE	ZBED2	down
7.05e-52	-1.04807	0.368	0.653	9.99e-48	3/0d	TDCE	SERTAD1	down
1.12e-51	-1.06988	0.248	0.574	1.58e-47	3/0d	TDCE	CPXM2	down
5.14e-50	-1.00321	0.071	0.384	7.29e-46	3/0d	TDCE	TSC22D3	down
1.25e-48	-1.20345	0.226	0.535	1.77e-44	3/0d	TDCE	ANGPTL4	down
2.02e-48	-1.15966	0.252	0.575	2.86e-44	3/0d	TDCE	TNS4	down
3.34e-47	-1.02032	0.212	0.521	4.74e-43	3/0d	TDCE	LMO4	down
1.42e-45	-1.04296	0.024	0.291	2.01e-41	3/0d	TDCE	CA6	down
2.79e-44	-1.03689	0.165	0.476	3.96e-40	3/0d	TDCE	SLC6A6	down
4.71e-39	-1.17372	0.649	0.783	6.68e-35	3/0d	TDCE	GADD45B	down
6.76e-37	-2.43734	0.119	0.391	9.59e-33	3/0d	TDCE	KRT15	down
1.72e-267	-3.76512	0.595	0.993	2.44e-263	1/0d	LSC	KRT15	down
4.72e-252	-3.51343	0.488	0.98	6.69e-248	1/0d	LSC	CSRP2	down
3.13e-232	-2.83929	0.663	0.984	4.43e-228	1/0d	LSC	FOS	down
3.06e-198	-3.52492	0.054	0.82	4.35e-194	1/0d	LSC	TXNIP	down
2.8e-147	-2.94748	0.157	0.764	3.97e-143	1/0d	LSC	ATF3	down
1.04e-137	-2.39345	0.191	0.78	1.48e-133	1/0d	LSC	DST	down
2.36e-131	-1.75752	0.49	0.908	3.34e-127	1/0d	LSC	EPAS1	down
3.52e-122	-1.46078	0.863	0.962	4.99e-118	1/0d	LSC	JUNB	down
3.28e-113	-2.81381	0.159	0.676	4.66e-109	1/0d	LSC	CXCL14	down
1.11e-105	-1.54924	0.362	0.786	1.57e-101	1/0d	LSC	ENSMFAG00000000455	down
7.75e-103	-2.42917	0.039	0.541	1.1e-98	1/0d	LSC	TNFSF10	down
2.09e-96	-2.05659	0.281	0.711	2.97e-92	1/0d	LSC	KLF4	down
8.55e-91	-1.55999	0.28	0.709	1.21e-86	1/0d	LSC	ENSMFAG00000039068	down
6.08e-90	-2.27848	0.262	0.672	8.62e-86	1/0d	LSC	NR4A1	down
3.9e-88	-1.30185	0.835	0.965	5.54e-84	1/0d	LSC	IGFBP2	down
1.61e-87	-1.65899	0.35	0.731	2.29e-83	1/0d	LSC	GSTM5	down
1.09e-86	-1.48418	0.555	0.843	1.55e-82	1/0d	LSC	TGFBI	down
1.92e-86	-1.93723	0.121	0.586	2.72e-82	1/0d	LSC	PAX6	down
2.51e-86	-1.69877	0.491	0.81	3.55e-82	1/0d	LSC	KRT19	down
3.07e-86	-1.73199	0.538	0.841	4.35e-82	1/0d	LSC	DCN	down
2.04e-84	-1.72716	0.468	0.787	2.89e-80	1/0d	LSC	FOSB	down
1.14e-76	-1.17266	0.692	0.892	1.62e-72	1/0d	LSC	DUSP1	down
6.05e-75	-1.92463	0.208	0.615	8.59e-71	1/0d	LSC	BTG2	down
7.25e-75	-1.54496	0.401	0.734	1.03e-70	1/0d	LSC	HSPB1	down
3.14e-74	-2.04557	0.122	0.53	4.45e-70	1/0d	LSC	NR4A2	down
2.2e-66	-1.20346	0.599	0.839	3.13e-62	1/0d	LSC	IER2	down
2.17e-63	-1.6296	0.223	0.58	3.08e-59	1/0d	LSC	CBR1	down
4.54e-62	-1.24273	0.478	0.752	6.44e-58	1/0d	LSC	PERP	down
2.87e-59	-1.70389	0.22	0.574	4.07e-55	1/0d	LSC	TIMP3	down
2.72e-58	-1.73044	0.006	0.32	3.85e-54	1/0d	LSC	DBP	down
1.73e-56	-1.84083	0.047	0.372	2.45e-52	1/0d	LSC	MAFB	down
2.38e-56	-1.48313	0.192	0.537	3.37e-52	1/0d	LSC	NUCKS1	down
3.25e-56	-1.49276	0.232	0.559	4.6e-52	1/0d	LSC	CIRBP	down
1.26e-55	-1.01871	0.714	0.891	1.79e-51	1/0d	LSC	ENSMFAG00000032893	down
7.2e-55	-1.09501	0.573	0.797	1.02e-50	1/0d	LSC	DSP	down
2.97e-52	-1.78137	0.042	0.35	4.21e-48	1/0d	LSC	CITED2	down
4.94e-52	-1.13654	0.477	0.756	7e-48	1/0d	LSC	ZFP36L1	down
5.06e-52	-1.62954	0.058	0.368	7.18e-48	1/0d	LSC	RETREG1	down
3.06e-51	-1.48886	0.257	0.566	4.34e-47	1/0d	LSC	NDUFA4L2	down
2.45e-50	-1.5093	0.146	0.477	3.48e-46	1/0d	LSC	TP63	down
9.44e-50	-1.47378	0.273	0.572	1.34e-45	1/0d	LSC	ADH1B	down
2.22e-49	-1.42666	0.281	0.592	3.15e-45	1/0d	LSC	IER3	down
4.89e-48	-1.27753	0.611	0.784	6.93e-44	1/0d	LSC	GADD45B	down
4.13e-47	-1.5661	0.089	0.386	5.86e-43	1/0d	LSC	MEIS2	down
1.01e-46	-1.31589	0.391	0.642	1.44e-42	1/0d	LSC	HOPX	down
8.95e-46	-1.53992	0.153	0.463	1.27e-41	1/0d	LSC	ID2	down
2.4e-45	-1.49402	0.238	0.526	3.4e-41	1/0d	LSC	ELF3	down
5.86e-43	-1.36539	0.112	0.404	8.31e-39	1/0d	LSC	FAM3C	down
2.78e-41	-1.43534	0.044	0.306	3.94e-37	1/0d	LSC	IL20RB	down
3.65e-41	-1.43383	0.02	0.267	5.17e-37	1/0d	LSC	VAV3	down
1.75e-40	-1.27702	0.15	0.441	2.48e-36	1/0d	LSC	YPEL	down
1.47e-39	-1.62917	0.029	0.271	2.08e-35	1/0d	LSC	ERICH5	down
4.8e-39	-1.23025	0.117	0.392	6.81e-35	1/0d	LSC	GSN	down
9.02e-39	-1.3221	0.019	0.252	1.28e-34	1/0d	LSC	HLF	down
2.17e-37	-1.27271	0.246	0.514	3.07e-33	1/0d	LSC	GLUL	down
7.91e-37	-1.26834	0.166	0.433	1.12e-32	1/0d	LSC	DAPL1	down
9.5e-37	-1.35332	0.009	0.223	1.35e-32	1/0d	LSC	BEND5	down
3.48e-36	-1.1297	0.258	0.525	4.93e-32	1/0d	LSC	SYNE2	down
1.68e-34	-1.25219	0.047	0.28	2.39e-30	1/0d	LSC	TOB1	down
5.46e-34	-1.12927	0.421	0.656	7.75e-30	1/0d	LSC	TSC22D1	down
1.22e-32	-1.19812	0.01	0.205	1.72e-28	1/0d	LSC	ENSMFAG00000036124	down
1.28e-32	-1.29608	0.05	0.273	1.82e-28	1/0d	LSC	TSC22D3	down
3.05e-32	-1.17336	0.029	0.237	4.32e-28	1/0d	LSC	LGR4	down
5e-32	-1.32974	0.061	0.281	7.1e-28	1/0d	LSC	ADRB2	down
5.9e-32	-1.17118	0.026	0.235	8.36e-28	1/0d	LSC	MEIS1	down
1.27e-31	-1.29536	0.085	0.311	1.8e-27	1/0d	LSC	RNASET2	down
5.84e-31	-1.21068	0.041	0.248	8.28e-27	1/0d	LSC	ROGDI	down
1.08e-30	-1.48993	0.141	0.374	1.53e-26	1/0d	LSC	APOE	down
1.58e-29	-1.10698	0.169	0.396	2.24e-25	1/0d	LSC	TMEM14C	down
1.75e-29	-1.30951	0.051	0.256	2.48e-25	1/0d	LSC	RASD1	down
4.6e-29	-1.09416	0.182	0.415	6.53e-25	1/0d	LSC	SYPL1	down
5.04e-29	-1.15934	0.105	0.327	7.15e-25	1/0d	LSC	PDCD4	down
5.31e-28	-1.09738	0.045	0.241	7.53e-24	1/0d	LSC	ENSMFAG00000032662	down
5.94e-28	-1.19238	0.101	0.308	8.42e-24	1/0d	LSC	CCNI	down
7.97e-28	-1.12891	0.103	0.322	1.13e-23	1/0d	LSC	VGLL4	down
8.48e-28	-1.12545	0.117	0.335	1.2e-23	1/0d	LSC	FGFR2	down
1.51e-27	-1.15055	0.086	0.293	2.14e-23	1/0d	LSC	CA12	down
8.04e-27	-1.25417	0.089	0.296	1.14e-22	1/0d	LSC	GADD45G	down
9.4e-26	-1.27211	0.055	0.245	1.33e-21	1/0d	LSC	TENT5A	down
9.43e-26	-1.02701	0.015	0.177	1.34e-21	1/0d	LSC	ARHGEF28	down
1.08e-25	-1.05449	0.02	0.187	1.53e-21	1/0d	LSC	LAMA5	down
2.13e-25	-1.10527	0.052	0.236	3.03e-21	1/0d	LSC	DMRTA2	down
2.45e-25	-1.07186	0.152	0.353	3.47e-21	1/0d	LSC	ENSMFAG00000022844	down
2.63e-25	-1.06538	0.092	0.29	3.72e-21	1/0d	LSC	WLS	down
4.61e-25	-1.14103	0.268	0.47	6.54e-21	1/0d	LSC	ARL4D	down
1.49e-24	-1.0306	0.216	0.417	2.11e-20	1/0d	LSC	LAMP1	down
4.23e-24	-1.17181	0.337	0.506	5.99e-20	1/0d	LSC	SOCS3	down
7.43e-24	-1.05656	0.191	0.39	1.05e-19	1/0d	LSC	IMPAD1	down
1.46e-23	-1.07336	0.122	0.321	2.07e-19	1/0d	LSC	PHIP	down
2.56e-23	-1.07967	0.041	0.206	3.63e-19	1/0d	LSC	SLC26A2	down
5.22e-23	-1.00444	0.026	0.183	7.4e-19	1/0d	LSC	DSG1	down
5.59e-23	-1.0366	0.13	0.326	7.93e-19	1/0d	LSC	NTRK2	down
1.82e-22	-1.05504	0.039	0.203	2.57e-18	1/0d	LSC	DDIT3	down
2.19e-22	-1.10396	0.054	0.221	3.11e-18	1/0d	LSC	LAMB1	down
4.79e-22	-1.17385	0.034	0.19	6.8e-18	1/0d	LSC	ABI3BP	down
9.28e-22	-1.33756	0.038	0.194	1.32e-17	1/0d	LSC	SLC2A14	down
2.45e-21	-1.06443	0.025	0.171	3.47e-17	1/0d	LSC	ANKRD37	down
4.28e-21	-1.03827	0.195	0.383	6.07e-17	1/0d	LSC	CEBPD	down
1.35e-20	-1.00744	0.117	0.289	1.92e-16	1/0d	LSC	COMT	down
3.6e-20	-1.11056	0.082	0.249	5.11e-16	1/0d	LSC	RGS2	down
4.14e-20	-1.1215	0.095	0.265	5.88e-16	1/0d	LSC	CRIM1	down
3.41e-19	-3.48377	0.012	0.134	4.84e-15	1/0d	LSC	GPHA2	down
6.79e-18	-1.0303	0.114	0.275	9.62e-14	1/0d	LSC	CCND1	down
6.99e-14	-1.41772	0.369	0.481	9.91e-10	1/0d	LSC	ENSMFAG00000032417	down
1.71e-10	-1.58774	0.415	0.481	2.42e-06	1/0d	LSC	ENSMFAG00000043424	down
3.91e-08	-1.41075	0.121	0.212	0.000553892	1/0d	LSC	PENK	down
1.22e-128	-5.0471	0.364	0.964	1.74e-124	3/1d	LSC	MT3	down
9.01e-105	-3.0297	0.464	0.934	1.28e-100	3/1d	LSC	AQP3	down
9.82e-98	-1.90203	0.922	0.966	1.39e-93	3/1d	LSC	SFN	down
1.06e-89	-1.15256	0.988	0.996	1.51e-85	3/1d	LSC	MT-ATP6	down
2.7e-88	-2.90811	0.489	0.876	3.83e-84	3/1d	LSC	CTSL	down
1.54e-81	-2.04487	0.567	0.886	2.18e-77	3/1d	LSC	YBX3	down
1.43e-79	-1.90893	0.71	0.948	2.03e-75	3/1d	LSC	ITGA2	down
4.87e-77	-1.45918	0.866	0.927	6.9e-73	3/1d	LSC	EIF4A1	down
1.02e-72	-2.82559	0.271	0.764	1.44e-68	3/1d	LSC	ENSMFAG00000000419	down
2.54e-69	-1.10284	0.978	0.965	3.6e-65	3/1d	LSC	EIF1	down
2.95e-60	-1.6378	0.71	0.878	4.18e-56	3/1d	LSC	TUBA1C	down
3.84e-55	-2.49159	0.277	0.723	5.45e-51	3/1d	LSC	IGFBP3	down
9.01e-55	-1.82676	0.511	0.799	1.28e-50	3/1d	LSC	TUBB4B	down
1.66e-46	-1.64143	0.558	0.8	2.36e-42	3/1d	LSC	NCL	down
3.34e-45	-2.0618	0.268	0.66	4.73e-41	3/1d	LSC	MAP4K4	down
1.36e-42	-1.74503	0.449	0.719	1.94e-38	3/1d	LSC	TOP1	down
4.22e-42	-1.48926	0.561	0.78	5.99e-38	3/1d	LSC	SRSF7	down
1.03e-39	-1.46656	0.57	0.79	1.46e-35	3/1d	LSC	TNS4	down
2.03e-37	-1.4092	0.526	0.749	2.88e-33	3/1d	LSC	SRSF2	down
1.3e-36	-1.35444	0.533	0.764	1.85e-32	3/1d	LSC	ATF4	down
2.42e-34	-1.45979	0.386	0.732	3.43e-30	3/1d	LSC	SERPINB1	down
6.3e-33	-1.75313	0.14	0.491	8.94e-29	3/1d	LSC	DDX21	down
1.88e-31	-2.03074	0.047	0.398	2.66e-27	3/1d	LSC	PLAT	down
6.81e-31	-1.31716	0.542	0.738	9.66e-27	3/1d	LSC	ENSMFAG00000045648	down
1.48e-30	-2.23095	0.181	0.506	2.1e-26	3/1d	LSC	SOD2	down
7.74e-30	-1.50796	0.358	0.634	1.1e-25	3/1d	LSC	NFKBIA	down
1.55e-29	-1.44679	0.592	0.735	2.2e-25	3/1d	LSC	NET1	down
4.15e-29	-1.24813	0.692	0.825	5.88e-25	3/1d	LSC	CTSV	down
9.59e-29	-1.07942	0.704	0.818	1.36e-24	3/1d	LSC	CD44	down
1.29e-28	-1.61924	0.215	0.519	1.82e-24	3/1d	LSC	GNL3	down
2.83e-28	-2.05287	0.037	0.356	4.01e-24	3/1d	LSC	ENSMFAG00000041970	down
2.62e-27	-1.17076	0.589	0.732	3.71e-23	3/1d	LSC	HNRNPDL	down
5.33e-27	-1.73375	0.121	0.437	7.56e-23	3/1d	LSC	FOSL1	down
6.93e-27	-1.60956	0.075	0.391	9.83e-23	3/1d	LSC	CPM	down
1.18e-26	-1.37675	0.364	0.608	1.67e-22	3/1d	LSC	HNRNPAB	down
6.05e-26	-2.47996	0.287	0.557	8.57e-22	3/1d	LSC	APOBEC3A	down
5.1e-25	-1.00012	0.685	0.789	7.24e-21	3/1d	LSC	ATP1A1	down
7.35e-25	-2.06945	0.502	0.72	1.04e-20	3/1d	LSC	MMP1	down
7.83e-25	-1.47839	0.287	0.539	1.11e-20	3/1d	LSC	ARPC5L	down
2.09e-24	-1.02564	0.919	0.934	2.97e-20	3/1d	LSC	ANXA1	down
1.62e-23	-1.51923	0.333	0.576	2.29e-19	3/1d	LSC	ENSMFAG00000044835	down
2.76e-23	-1.58613	0.128	0.421	3.91e-19	3/1d	LSC	DUSP6	down
1.09e-22	-1.43876	0.237	0.501	1.54e-18	3/1d	LSC	MAT2A	down
5.6e-22	-1.05122	0.707	0.767	7.95e-18	3/1d	LSC	EZR	down
5.79e-22	-1.19196	0.436	0.62	8.21e-18	3/1d	LSC	CYCS	down
8.2e-22	-1.42253	0.134	0.411	1.16e-17	3/1d	LSC	MET	down
3.97e-21	-1.62166	0.059	0.318	5.63e-17	3/1d	LSC	ISG20	down
5.31e-21	-1.33688	0.187	0.448	7.53e-17	3/1d	LSC	FAM89A	down
5.98e-21	-1.60855	0.231	0.478	8.48e-17	3/1d	LSC	GJB4	down
1.18e-20	-1.35193	0.237	0.469	1.67e-16	3/1d	LSC	ENSMFAG00000044001	down
1.52e-20	-1.40184	0.199	0.445	2.16e-16	3/1d	LSC	BAG1	down
3.03e-20	-1.80828	0.019	0.257	4.3e-16	3/1d	LSC	VMO1	down
5.12e-20	-1.41363	0.259	0.485	7.27e-16	3/1d	LSC	MAST4	down
7.7e-20	-1.30916	0.224	0.471	1.09e-15	3/1d	LSC	NOP56	down
8.12e-20	-1.16704	0.427	0.596	1.15e-15	3/1d	LSC	SNU13	down
9.62e-20	-1.34151	0.274	0.496	1.36e-15	3/1d	LSC	ENSMFAG00000045132	down
1.09e-19	-1.23996	0.349	0.557	1.54e-15	3/1d	LSC	SLC7A5	down
3.97e-19	-1.04984	0.505	0.662	5.63e-15	3/1d	LSC	ETS2	down
5.74e-19	-1.12466	0.436	0.615	8.14e-15	3/1d	LSC	EIF5	down
1.3e-18	-1.2791	0.159	0.408	1.85e-14	3/1d	LSC	WDR43	down
3.72e-18	-1.19533	0.33	0.535	5.28e-14	3/1d	LSC	PA2G4	down
5.22e-18	-1.2177	0.019	0.235	7.41e-14	3/1d	LSC	CXCL16	down
6.2e-18	-1.26375	0.433	0.587	8.79e-14	3/1d	LSC	PTP4A1	down
8.02e-18	-1.29145	0.093	0.329	1.14e-13	3/1d	LSC	LYAR	down
8.95e-18	-1.25226	0.156	0.391	1.27e-13	3/1d	LSC	HOPX	down
1.18e-17	-1.31971	0.193	0.429	1.67e-13	3/1d	LSC	EHF	down
1.36e-17	-1.30082	0.084	0.313	1.93e-13	3/1d	LSC	RCL1	down
3.5e-17	-1.02019	0.614	0.7	4.96e-13	3/1d	LSC	ADIRF	down
7.48e-17	-1.05839	0.548	0.64	1.06e-12	3/1d	LSC	ENSMFAG00000032317	down
1.16e-16	-1.32699	0.171	0.397	1.64e-12	3/1d	LSC	UGCG	down
2.95e-16	-1.29959	0.1	0.315	4.18e-12	3/1d	LSC	RRP9	down
2.97e-16	-1.2516	0.125	0.345	4.21e-12	3/1d	LSC	NOP16	down
3.08e-16	-1.20389	0.174	0.392	4.37e-12	3/1d	LSC	NIFK	down
4.55e-16	-1.23927	0.346	0.539	6.46e-12	3/1d	LSC	PHLDA2	down
5.28e-16	-1.07368	0.551	0.643	7.48e-12	3/1d	LSC	MACF1	down
5.53e-16	-1.04139	0.016	0.208	7.85e-12	3/1d	LSC	PITPNC1	down
1.88e-15	-1.36809	0.072	0.28	2.67e-11	3/1d	LSC	EHD4	down
3.06e-15	-1.18849	0.128	0.338	4.34e-11	3/1d	LSC	DKC1	down
5.37e-15	-1.23084	0.181	0.38	7.61e-11	3/1d	LSC	GRPEL1	down
7.68e-15	-1.24521	0.125	0.329	1.09e-10	3/1d	LSC	NABP1	down
7.94e-15	-1.31828	0.125	0.331	1.13e-10	3/1d	LSC	CD55	down
8.77e-15	-1.02347	0.505	0.628	1.24e-10	3/1d	LSC	SGK1	down
1.23e-14	-1.03977	0.349	0.519	1.75e-10	3/1d	LSC	HYPK	down
1.33e-14	-1.56769	0.312	0.472	1.88e-10	3/1d	LSC	ENSMFAG00000044185	down
1.45e-14	-1.26764	0.24	0.43	2.05e-10	3/1d	LSC	NOP58	down
1.54e-14	-1.19625	0.159	0.369	2.18e-10	3/1d	LSC	VEGFA	down
1.93e-14	-1.17253	0.121	0.325	2.73e-10	3/1d	LSC	TNIP2	down
2.06e-14	-1.40071	0.159	0.367	2.93e-10	3/1d	LSC	SLC6A6	down
4.63e-14	-1.29964	0.202	0.399	6.57e-10	3/1d	LSC	TNFRSF1A	down
4.69e-14	-1.19366	0.168	0.366	6.65e-10	3/1d	LSC	GTPBP4	down
1.48e-13	-1.18799	0.137	0.327	2.11e-09	3/1d	LSC	IMPA2	down
1.5e-13	-1.19919	0.271	0.446	2.13e-09	3/1d	LSC	EPHA2	down
1.51e-13	-1.27697	0.131	0.325	2.14e-09	3/1d	LSC	ETV3	down
1.89e-13	-1.25318	0.106	0.296	2.67e-09	3/1d	LSC	TMTC2	down
2.1e-13	-1.57623	0.121	0.324	2.98e-09	3/1d	LSC	MMP10	down
2.21e-13	-1.16003	0.318	0.468	3.13e-09	3/1d	LSC	TUBB6	down
2.33e-13	-1.13606	0.333	0.497	3.3e-09	3/1d	LSC	ANKRD12	down
4.48e-13	-1.15044	0.165	0.362	6.36e-09	3/1d	LSC	FAM110C	down
5.14e-13	-1.12529	0.302	0.449	7.29e-09	3/1d	LSC	EIF1B	down
9.71e-13	-1.15129	0.065	0.246	1.38e-08	3/1d	LSC	TXNRD1	down
4.57e-12	-1.04365	0.318	0.469	6.48e-08	3/1d	LSC	SELENOK	down
4.74e-12	-1.30851	0.128	0.308	6.72e-08	3/1d	LSC	HBEGF	down
4.98e-12	-1.12648	0.093	0.27	7.06e-08	3/1d	LSC	ENSMFAG00000042676	down
6.08e-12	-1.10849	0.405	0.534	8.62e-08	3/1d	LSC	TGIF1	down
6.77e-12	-1.15051	0.209	0.383	9.6e-08	3/1d	LSC	GRB7	down
8.9e-12	-1.13464	0.215	0.385	1.26e-07	3/1d	LSC	TSC22D2	down
1.01e-11	-1.12879	0.121	0.296	1.43e-07	3/1d	LSC	MTHFD2	down
1.1e-11	-1.24083	0.168	0.337	1.56e-07	3/1d	LSC	CDCP1	down
1.16e-11	-1.16561	0.174	0.338	1.64e-07	3/1d	LSC	RPL36	down
1.64e-11	-1.00262	0.047	0.208	2.32e-07	3/1d	LSC	SLC1A5	down
2.67e-11	-1.07664	0.159	0.331	3.79e-07	3/1d	LSC	CD46	down
3.4e-11	-1.00406	0.168	0.337	4.82e-07	3/1d	LSC	SOCS3	down
4.02e-11	-1.10665	0.221	0.382	5.7e-07	3/1d	LSC	MAP2K3	down
5.25e-11	-1.12445	0.15	0.318	7.44e-07	3/1d	LSC	ENSMFAG00000000835	down
5.39e-11	-1.00163	0.115	0.281	7.65e-07	3/1d	LSC	PNO1	down
6.65e-11	-1.0675	0.146	0.313	9.43e-07	3/1d	LSC	CHD1	down
6.83e-11	-1.03807	0.047	0.2	9.69e-07	3/1d	LSC	SH2D5	down
7.72e-11	-1.05299	0.078	0.239	1.09e-06	3/1d	LSC	TAF1D	down
8.33e-11	-1.1183	0	0.121	1.18e-06	3/1d	LSC	PENK	down
9.47e-11	-1.01989	0.283	0.434	1.34e-06	3/1d	LSC	SEMA4B	down
1.09e-10	-1.03063	0.296	0.433	1.54e-06	3/1d	LSC	TOMM5	down
1.13e-10	-1.18411	0.121	0.28	1.61e-06	3/1d	LSC	SLC38A1	down
2.19e-10	-1.06609	0.221	0.378	3.11e-06	3/1d	LSC	IL4R	down
6.98e-10	-1.04429	0.274	0.408	9.9e-06	3/1d	LSC	G3BP1	down
1.31e-09	-1.02512	0.187	0.335	1.86e-05	3/1d	LSC	NAA15	down
1.39e-09	-1.06946	0.224	0.369	1.98e-05	3/1d	LSC	IL6ST	down
3.73e-09	-1.00997	0.112	0.262	5.29e-05	3/1d	LSC	KDM6B	down
4.28e-09	-1.12607	0.178	0.324	6.06e-05	3/1d	LSC	SDC4	down
6.52e-09	-1.02821	0.246	0.38	9.25e-05	3/1d	LSC	EFHD2	down
8.41e-09	-1.21084	0.05	0.185	0.000119245	3/1d	LSC	CXCL8	down
1.38e-08	-1.2399	0.333	0.433	0.000195594	3/1d	LSC	TRIM28	down
3.04e-07	-1.50459	0.025	0.122	0.00431557	3/1d	LSC	CXCL1	down
2.77e-153	-3.22745	0.704	0.993	3.93e-149	3/0d	LSC	KRT15	down
8.3e-148	-3.38148	0.682	0.98	1.18e-143	3/0d	LSC	CSRP2	down
3.02e-132	-1.35413	0.988	0.999	4.29e-128	3/0d	LSC	MT-ATP6	down
4.47e-132	-1.19844	0.994	0.999	6.34e-128	3/0d	LSC	MT-CYTB	down
1.01e-129	-1.14922	0.994	0.999	1.43e-125	3/0d	LSC	MT-COX3	down
1.52e-125	-1.15892	0.997	0.999	2.16e-121	3/0d	LSC	MT-COX2	down
4.31e-120	-2.76152	0.464	0.94	6.11e-116	3/0d	LSC	AQP3	down
3.95e-114	-2.70858	0.393	0.908	5.6e-110	3/0d	LSC	EPAS1	down
2.4e-113	-1.99487	0.95	0.984	3.41e-109	3/0d	LSC	FOS	down
4.39e-113	-2.29148	0.835	0.962	6.23e-109	3/0d	LSC	JUNB	down
6.05e-109	-1.20196	0.981	0.999	8.58e-105	3/0d	LSC	MT-ND1	down
2.4e-93	-2.78175	0.265	0.82	3.4e-89	3/0d	LSC	TXNIP	down
4.24e-74	-1.06962	0.96	0.991	6.01e-70	3/0d	LSC	MT-ND2	down
1.53e-71	-2.33134	0.383	0.784	2.17e-67	3/0d	LSC	MT1X	down
8.97e-70	-1.89289	0.611	0.839	1.27e-65	3/0d	LSC	IER2	down
4.34e-65	-1.62431	0.779	0.891	6.15e-61	3/0d	LSC	ENSMFAG00000032893	down
7.38e-62	-2.56815	0.156	0.642	1.05e-57	3/0d	LSC	HOPX	down
9.43e-57	-2.25792	0.277	0.704	1.34e-52	3/0d	LSC	IGFBP3	down
3.99e-52	-1.07324	0.875	0.939	5.66e-48	3/0d	LSC	MT-COX1	down
2.07e-51	-1.31334	0.782	0.892	2.93e-47	3/0d	LSC	DUSP1	down
9.97e-51	-1.74494	0.461	0.731	1.41e-46	3/0d	LSC	GSTM5	down
1.5e-49	-1.88413	0.614	0.784	2.12e-45	3/0d	LSC	GADD45B	down
3.51e-48	-1.64802	0.645	0.803	4.98e-44	3/0d	LSC	ZFP36	down
1e-42	-1.15701	0.916	0.965	1.42e-38	3/0d	LSC	IGFBP2	down
7.59e-36	-2.17588	0.168	0.506	1.08e-31	3/0d	LSC	SOCS3	down
1e-35	-1.8852	0.467	0.672	1.42e-31	3/0d	LSC	NR4A1	down
6.84e-32	-1.58275	0.265	0.574	9.7e-28	3/0d	LSC	TIMP3	down
8.74e-32	-1.4763	0.561	0.693	1.24e-27	3/0d	LSC	SRSF7	down
9.02e-32	-1.91249	0.227	0.53	1.28e-27	3/0d	LSC	NR4A2	down
1.25e-31	-1.66518	0.296	0.572	1.77e-27	3/0d	LSC	ADH1B	down
2.99e-26	-1.49794	0.405	0.602	4.24e-22	3/0d	LSC	PLK2	down
3.35e-25	-1.25939	0.626	0.711	4.75e-21	3/0d	LSC	KLF4	down
1.13e-24	-1.76747	0.072	0.35	1.61e-20	3/0d	LSC	CITED2	down
6.18e-24	-1.51091	0.09	0.368	8.77e-20	3/0d	LSC	RETREG1	down
1.64e-23	-1.02035	0.695	0.756	2.32e-19	3/0d	LSC	ZFP36L1	down
1.47e-22	-1.29692	0.433	0.586	2.09e-18	3/0d	LSC	PAX6	down
7.4e-22	-1.4719	0.062	0.32	1.05e-17	3/0d	LSC	DBP	down
7.55e-22	-1.65504	0.134	0.383	1.07e-17	3/0d	LSC	CEBPD	down
4.79e-21	-1.40682	0.016	0.252	6.79e-17	3/0d	LSC	HLF	down
5.2e-21	-1.32039	0.445	0.615	7.38e-17	3/0d	LSC	BTG2	down
8.04e-21	-1.5478	0.352	0.526	1.14e-16	3/0d	LSC	ELF3	down
5.82e-20	-1.57522	0.28	0.476	8.26e-16	3/0d	LSC	ZFP36L2	down
9.47e-20	-1.2698	0.458	0.58	1.34e-15	3/0d	LSC	CBR1	down
3.15e-19	-2.52905	0	0.212	4.46e-15	3/0d	LSC	PENK	down
1.22e-18	-1.50436	0.059	0.284	1.73e-14	3/0d	LSC	CST6	down
5.99e-18	-1.47309	0.184	0.39	8.49e-14	3/0d	LSC	IMPAD1	down
1.35e-17	-1.49036	0.159	0.372	1.92e-13	3/0d	LSC	MAFB	down
1.72e-17	-1.40134	0.056	0.273	2.45e-13	3/0d	LSC	TSC22D3	down
4.12e-17	-1.45299	0	0.19	5.84e-13	3/0d	LSC	ABI3BP	down
6.81e-17	-1.15231	0.511	0.619	9.65e-13	3/0d	LSC	EGR1	down
7.44e-17	-1.47451	0.081	0.296	1.05e-12	3/0d	LSC	GADD45G	down
1.79e-16	-1.14096	0.511	0.588	2.53e-12	3/0d	LSC	TUBB4B	down
3.57e-16	-1.4016	0.053	0.256	5.06e-12	3/0d	LSC	RASD1	down
9.03e-16	-1.36695	0.109	0.311	1.28e-11	3/0d	LSC	RNASET2	down
6.58e-15	-1.26472	0.396	0.514	9.33e-11	3/0d	LSC	GLUL	down
1.28e-14	-1.27901	0.065	0.255	1.82e-10	3/0d	LSC	H2AX	down
1.92e-14	-1.30705	0.137	0.326	2.73e-10	3/0d	LSC	NTRK2	down
2.17e-14	-1.19825	0.327	0.477	3.08e-10	3/0d	LSC	TP63	down
2.37e-14	-1.33694	0.318	0.463	3.37e-10	3/0d	LSC	ID2	down
2.76e-14	-1.17328	0.156	0.348	3.92e-10	3/0d	LSC	NFKBIZ	down
5.43e-14	-1.01214	0.495	0.559	7.7e-10	3/0d	LSC	CIRBP	down
8.17e-14	-1.09655	0	0.154	1.16e-09	3/0d	LSC	FAM107A	down
8.46e-14	-1.24271	0.227	0.391	1.2e-09	3/0d	LSC	HEXIM1	down
2.04e-13	-1.06558	0.003	0.155	2.89e-09	3/0d	LSC	GRIA3	down
4e-13	-1.198	0.072	0.249	5.67e-09	3/0d	LSC	RGS2	down
6.97e-13	-1.14278	0.037	0.203	9.89e-09	3/0d	LSC	PER3	down
1.65e-12	-1.11821	0.455	0.524	2.35e-08	3/0d	LSC	SERTAD1	down
1.72e-12	-1.36323	0.1	0.271	2.44e-08	3/0d	LSC	ERICH5	down
5e-12	-3.63531	0	0.134	7.1e-08	3/0d	LSC	GPHA2	down
8.17e-12	-1.08203	0.031	0.181	1.16e-07	3/0d	LSC	SOCS1	down
3.17e-11	-1.23376	0.128	0.281	4.5e-07	3/0d	LSC	ADRB2	down
4.18e-11	-1.04575	0.274	0.413	5.93e-07	3/0d	LSC	G0S2	down
5.65e-11	-1.119	0.221	0.357	8.01e-07	3/0d	LSC	MYCBP2	down
5.67e-11	-1.05037	0.181	0.335	8.04e-07	3/0d	LSC	FGFR2	down
1.03e-10	-1.19013	0.383	0.47	1.46e-06	3/0d	LSC	ARL4D	down
1.38e-10	-1.12472	0.333	0.443	1.95e-06	3/0d	LSC	ENSMFAG00000044835	down
3.29e-10	-1.008	0.062	0.207	4.66e-06	3/0d	LSC	NR1D1	down
4.37e-10	-1.08012	0.165	0.306	6.2e-06	3/0d	LSC	IL20RB	down
6.56e-10	-1.10621	0.097	0.245	9.3e-06	3/0d	LSC	TENT5A	down
1.3e-09	-1.05737	0.143	0.28	1.84e-05	3/0d	LSC	TOB1	down
5.82e-09	-1.0044	0.056	0.181	8.25e-05	3/0d	LSC	STK35	down
6.03e-09	-1.07611	0.097	0.225	8.55e-05	3/0d	LSC	ENSMFAG00000040641	down
1.83e-08	-1.02298	0.059	0.179	0.000259746	3/0d	LSC	GRASP	down
1.08e-07	-1.03948	0.137	0.248	0.00152616	3/0d	LSC	IMPA2	down
1.44e-07	-1.17717	0.277	0.366	0.00204066	3/0d	LSC	ENSMFAG00000008326	down
4.03e-07	-1.00575	0.159	0.267	0.0057224	3/0d	LSC	SLC6A6	down
3.35e-06	-1.38643	0.025	0.106	0.0474744	3/0d	LSC	CXCL1	down
1.68e-157	-2.36661	0.749	0.996	2.38e-153	1/0d	CC	FOS	down
2.55e-157	-3.38963	0.1	0.895	3.61e-153	1/0d	CC	TXNIP	down
6.18e-122	-2.08695	0.498	0.935	8.76e-118	1/0d	CC	ADH1B	down
1.24e-121	-1.39923	0.91	0.998	1.76e-117	1/0d	CC	HSPB1	down
3.28e-118	-2.78154	0.371	0.886	4.64e-114	1/0d	CC	CSRP2	down
3.07e-106	-1.8011	0.891	0.976	4.36e-102	1/0d	CC	KRT5	down
7.42e-105	-2.58159	0.172	0.781	1.05e-100	1/0d	CC	MT1X	down
2.1e-102	-2.76488	0.616	0.922	2.98e-98	1/0d	CC	KRT15	down
7.82e-102	-1.96874	0.461	0.909	1.11e-97	1/0d	CC	ATF3	down
1.68e-98	-2.12736	0.183	0.763	2.38e-94	1/0d	CC	DST	down
5.02e-92	-1.31475	0.908	0.98	7.12e-88	1/0d	CC	JUNB	down
2.52e-91	-1.56483	0.417	0.886	3.58e-87	1/0d	CC	DSG1	down
6.72e-90	-1.25325	0.961	0.989	9.52e-86	1/0d	CC	ALDH3A1	down
1.66e-89	-1.33221	0.583	0.931	2.35e-85	1/0d	CC	ENSMFAG00000039068	down
1.87e-85	-1.67725	0.598	0.913	2.66e-81	1/0d	CC	GADD45B	down
6.98e-83	-1.23116	0.858	0.991	9.89e-79	1/0d	CC	ZFP36L1	down
1.04e-80	-1.79839	0.319	0.797	1.48e-76	1/0d	CC	NR4A2	down
7.67e-76	-1.59726	0.395	0.804	1.09e-71	1/0d	CC	PDCD4	down
1.2e-73	-1.81261	0.273	0.736	1.7e-69	1/0d	CC	EPAS1	down
1.52e-72	-1.64811	0.118	0.627	2.16e-68	1/0d	CC	TNFSF10	down
1.02e-71	-1.64077	0.435	0.835	1.45e-67	1/0d	CC	NR4A1	down
1.24e-70	-1.51807	0.435	0.824	1.76e-66	1/0d	CC	CEBPD	down
1.41e-69	-1.06118	0.899	0.969	2e-65	1/0d	CC	DUSP1	down
6.56e-68	-1.42934	0.718	0.897	9.31e-64	1/0d	CC	FOSB	down
1.63e-67	-1.59649	0.38	0.788	2.31e-63	1/0d	CC	CBR1	down
1.96e-66	-1.62251	0.465	0.822	2.78e-62	1/0d	CC	GLO1	down
3.44e-66	-1.09534	0.814	0.942	4.87e-62	1/0d	CC	IER2	down
2.88e-65	-1.45923	0.061	0.524	4.09e-61	1/0d	CC	IL20RB	down
5.05e-65	-1.25149	0.537	0.862	7.16e-61	1/0d	CC	PAX6	down
5.29e-65	-1.02003	0.838	0.96	7.51e-61	1/0d	CC	H2AZ1	down
2.59e-64	-1.58645	0.114	0.58	3.67e-60	1/0d	CC	ADRB2	down
4.91e-64	-1.45266	0.131	0.601	6.96e-60	1/0d	CC	LGR4	down
1.86e-63	-1.56395	0.561	0.889	2.64e-59	1/0d	CC	ENSMFAG00000039064	down
3.74e-62	-1.24562	0.76	0.929	5.3e-58	1/0d	CC	KLF4	down
1.18e-61	-1.55627	0.089	0.547	1.68e-57	1/0d	CC	RASD1	down
2.23e-61	-1.43213	0.042	0.478	3.17e-57	1/0d	CC	VAV3	down
6.25e-61	-3.47718	0.07	0.507	8.86e-57	1/0d	CC	KRT3	down
5.69e-59	-1.48919	0.111	0.556	8.06e-55	1/0d	CC	TP63	down
1.28e-58	-1.37443	0.315	0.708	1.82e-54	1/0d	CC	SYNE2	down
2.89e-58	-1.20117	0.526	0.857	4.1e-54	1/0d	CC	DSC3	down
1.39e-57	-1.41265	0.046	0.466	1.97e-53	1/0d	CC	LAMB1	down
1.88e-57	-1.06619	0.655	0.899	2.67e-53	1/0d	CC	ENSMFAG00000032635	down
4.07e-57	-1.43525	0.321	0.736	5.77e-53	1/0d	CC	TGFBI	down
5.63e-56	-1.27911	0.03	0.433	7.98e-52	1/0d	CC	DBP	down
7.3e-56	-1.5495	0.109	0.529	1.04e-51	1/0d	CC	TPM1	down
7.59e-56	-1.55661	0.127	0.549	1.08e-51	1/0d	CC	MAFB	down
4.87e-55	-1.17447	0.607	0.868	6.9e-51	1/0d	CC	DAPL1	down
2.09e-54	-1.28495	0.325	0.712	2.96e-50	1/0d	CC	NUCKS1	down
3.07e-54	-1.05736	0.734	0.92	4.35e-50	1/0d	CC	ENSMFAG00000032893	down
1.19e-53	-1.34709	0.421	0.761	1.68e-49	1/0d	CC	TP53I3	down
4.64e-51	-1.30453	0.194	0.605	6.58e-47	1/0d	CC	LMO4	down
4.8e-51	-1.47644	0.446	0.739	6.8e-47	1/0d	CC	ERICH5	down
2.86e-49	-1.19728	0.186	0.592	4.05e-45	1/0d	CC	XDH	down
9.46e-49	-1.50569	0.581	0.857	1.34e-44	1/0d	CC	IGFBP2	down
2.04e-48	-1.36517	0.452	0.757	2.9e-44	1/0d	CC	ID3	down
3.06e-48	-1.2667	0.26	0.634	4.34e-44	1/0d	CC	JAG1	down
5.11e-47	-1.16533	0.061	0.438	7.24e-43	1/0d	CC	HLF	down
4.87e-44	-1.32537	0.14	0.516	6.9e-40	1/0d	CC	GADD45G	down
8.45e-44	-1.19243	0.506	0.783	1.2e-39	1/0d	CC	ARL4D	down
8.72e-44	-1.17522	0.28	0.639	1.24e-39	1/0d	CC	MYLIP	down
1.98e-43	-1.00103	0.692	0.888	2.81e-39	1/0d	CC	BTG2	down
3.87e-42	-1.94772	0.1	0.446	5.49e-38	1/0d	CC	CXCL14	down
7.02e-42	-1.12844	0.303	0.645	9.96e-38	1/0d	CC	MYCBP2	down
2.47e-40	-1.12664	0.092	0.437	3.5e-36	1/0d	CC	ARHGEF28	down
3.57e-40	-1.14591	0.138	0.507	5.06e-36	1/0d	CC	MEIS1	down
8.75e-40	-1.33898	0.105	0.447	1.24e-35	1/0d	CC	TIMP3	down
3.61e-39	-1.05657	0.12	0.466	5.12e-35	1/0d	CC	TMEM159	down
3.92e-39	-1.0148	0.476	0.75	5.56e-35	1/0d	CC	CIRBP	down
3.35e-38	-1.72658	0.026	0.319	4.76e-34	1/0d	CC	CYP26A1	down
5.78e-38	-1.01381	0.041	0.346	8.2e-34	1/0d	CC	ENSMFAG00000036124	down
6.71e-38	-1.07392	0.201	0.545	9.52e-34	1/0d	CC	VGLL4	down
8.61e-38	-1.20585	0.173	0.522	1.22e-33	1/0d	CC	ZNF750	down
6.61e-37	-1.35969	0.087	0.402	9.38e-33	1/0d	CC	NDUFA4L2	down
6.78e-37	-1.3685	0.343	0.65	9.62e-33	1/0d	CC	CRTAC1	down
3.87e-36	-1.05237	0.09	0.406	5.49e-32	1/0d	CC	ROGDI	down
5.01e-36	-1.05558	0.649	0.842	7.1e-32	1/0d	CC	ID1	down
1.5e-35	-1.03609	0.133	0.457	2.13e-31	1/0d	CC	H2AW	down
3.49e-33	-1.13427	0.114	0.418	4.94e-29	1/0d	CC	ENSMFAG00000030485	down
7.06e-33	-1.04915	0.065	0.353	1e-28	1/0d	CC	SLC23A2	down
3.37e-32	-1.05216	0.085	0.379	4.78e-28	1/0d	CC	UACA	down
6.26e-32	-1.16173	0.12	0.422	8.88e-28	1/0d	CC	ID2	down
1.31e-31	-1.07543	0.031	0.292	1.85e-27	1/0d	CC	ANKRD37	down
1.37e-31	-1.00555	0.162	0.473	1.94e-27	1/0d	CC	HOMER2	down
5.58e-31	-1.01699	0.218	0.513	7.91e-27	1/0d	CC	TOB1	down
9.35e-31	-1.16601	0.376	0.63	1.33e-26	1/0d	CC	SOD3	down
2.78e-29	-1.0112	0.207	0.493	3.94e-25	1/0d	CC	OSR2	down
6.33e-29	-1.02775	0.339	0.612	8.97e-25	1/0d	CC	TUBA4A	down
1.28e-23	-1.05314	0.148	0.406	1.82e-19	1/0d	CC	GPNMB	down
1.21e-13	-1.11793	0.393	0.569	1.71e-09	1/0d	CC	KRT24	down
1.12e-155	-3.5763	0.024	0.828	1.59e-151	3/1d	CC	TNNT3	down
1.8e-145	-1.38418	1	0.998	2.55e-141	3/1d	CC	MT-COX2	down
2.6e-136	-1.46722	0.997	0.998	3.69e-132	3/1d	CC	MT-ATP6	down
3.54e-134	-1.31358	1	0.996	5.02e-130	3/1d	CC	MT-CYTB	down
1.12e-130	-1.42021	0.997	0.994	1.59e-126	3/1d	CC	MT-ND1	down
1.31e-129	-1.22624	1	0.998	1.85e-125	3/1d	CC	MT-COX3	down
1.13e-103	-1.70188	0.918	0.991	1.6e-99	3/1d	CC	SFN	down
6.89e-103	-2.65084	0.274	0.792	9.78e-99	3/1d	CC	ENSMFAG00000000419	down
1.22e-101	-1.41052	0.97	0.991	1.73e-97	3/1d	CC	MT-ND2	down
4.93e-101	-1.93759	0.953	0.996	6.99e-97	3/1d	CC	APOBEC3A	down
3.16e-94	-2.33775	0.453	0.9	4.48e-90	3/1d	CC	ITGA2	down
5.69e-92	-1.20989	0.981	0.991	8.07e-88	3/1d	CC	MT-ND5	down
7.35e-92	-2.09856	0.252	0.775	1.04e-87	3/1d	CC	ISG20	down
3.39e-86	-1.33831	0.927	0.985	4.8e-82	3/1d	CC	SERPINB1	down
8.42e-84	-3.83042	0.156	0.673	1.19e-79	3/1d	CC	MT3	down
1.37e-83	-1.83971	0.206	0.72	1.95e-79	3/1d	CC	ENSMFAG00000045648	down
2.52e-83	-1.4352	0.635	0.908	3.57e-79	3/1d	CC	YBX3	down
2.91e-82	-1.34978	0.809	0.97	4.13e-78	3/1d	CC	MT-COX1	down
3.05e-82	-1.77475	0.694	0.924	4.32e-78	3/1d	CC	CD55	down
4.39e-82	-2.22178	0.589	0.884	6.22e-78	3/1d	CC	CTSL	down
6.59e-82	-1.15944	0.906	0.959	9.35e-78	3/1d	CC	EIF4A1	down
1.72e-79	-1.49416	0.72	0.91	2.45e-75	3/1d	CC	CLDN7	down
3.94e-76	-1.67264	0.344	0.773	5.59e-72	3/1d	CC	SRSF7	down
4.29e-76	-1.85548	0.617	0.88	6.08e-72	3/1d	CC	SLC6A14	down
5.06e-75	-1.8407	0.437	0.834	7.18e-71	3/1d	CC	ETV3	down
1.9e-74	-1.84029	0.295	0.747	2.69e-70	3/1d	CC	GJB4	down
2.98e-73	-1.3451	0.596	0.88	4.22e-69	3/1d	CC	TUBB4B	down
1.39e-72	-1.84399	0.227	0.703	1.97e-68	3/1d	CC	IL6ST	down
1.36e-69	-1.08822	0.984	0.998	1.93e-65	3/1d	CC	SAT1	down
1.43e-69	-1.42822	0.509	0.841	2.03e-65	3/1d	CC	MAP4K4	down
6.07e-69	-1.44169	0.497	0.828	8.61e-65	3/1d	CC	TOP1	down
2.49e-65	-1.51779	1	0.996	3.52e-61	3/1d	CC	ANXA1	down
5.27e-64	-1.64123	0.638	0.878	7.47e-60	3/1d	CC	CXCL17	down
2.49e-63	-1.18488	0.815	0.923	3.54e-59	3/1d	CC	PTP4A1	down
7.35e-63	-1.52817	0.364	0.747	1.04e-58	3/1d	CC	RBM47	down
3.81e-58	-1.33565	0.524	0.83	5.4e-54	3/1d	CC	ST14	down
4.73e-56	-1.31535	0.42	0.756	6.7e-52	3/1d	CC	MAST4	down
5.88e-52	-1.34886	0.142	0.546	8.34e-48	3/1d	CC	MET	down
8.59e-52	-1.13536	0.61	0.827	1.22e-47	3/1d	CC	ANXA5	down
1.4e-51	-1.23663	0.642	0.869	1.98e-47	3/1d	CC	CD44	down
4.8e-51	-1.28341	0.322	0.694	6.8e-47	3/1d	CC	MAT2A	down
1.19e-49	-1.20609	0.542	0.867	1.68e-45	3/1d	CC	PIP	down
2.34e-49	-1.1909	0.383	0.729	3.32e-45	3/1d	CC	RAP1B	down
4.43e-49	-1.17353	0.559	0.812	6.28e-45	3/1d	CC	SERP1	down
5.27e-47	-1.12399	0.615	0.825	7.47e-43	3/1d	CC	MCL1	down
4.84e-46	-1.95998	0.054	0.406	6.86e-42	3/1d	CC	PADI1	down
1.59e-45	-1.59006	0.124	0.493	2.25e-41	3/1d	CC	PLAT	down
3.18e-45	-1.46078	0.182	0.559	4.52e-41	3/1d	CC	TXNRD1	down
3.3e-45	-1.14098	0.17	0.554	4.68e-41	3/1d	CC	ENSMFAG00000034637	down
4.38e-45	-2.07736	0.224	0.581	6.21e-41	3/1d	CC	IGFBP2	down
5.36e-45	-1.2078	0.292	0.642	7.6e-41	3/1d	CC	BCL10	down
6.63e-45	-1.33301	0.114	0.482	9.4e-41	3/1d	CC	TMPRSS2	down
2.27e-44	-1.01692	0.542	0.81	3.21e-40	3/1d	CC	CTSV	down
1.07e-42	-1.0778	0.456	0.742	1.51e-38	3/1d	CC	ENSMFAG00000032317	down
4.93e-42	-1.24583	0.276	0.672	6.99e-38	3/1d	CC	IGF2	down
1.3e-41	-1.03823	0.537	0.788	1.84e-37	3/1d	CC	SRSF2	down
1.62e-41	-1.23614	0.124	0.476	2.3e-37	3/1d	CC	ENSMFAG00000040946	down
2.4e-41	-1.17935	0.196	0.554	3.4e-37	3/1d	CC	LRRC8A	down
2.63e-41	-1.02204	0.329	0.661	3.74e-37	3/1d	CC	HNRNPAB	down
8.59e-41	-1.09589	0.145	0.5	1.22e-36	3/1d	CC	CXCL16	down
9.12e-41	-1.10139	0.771	0.9	1.29e-36	3/1d	CC	LMO7	down
1.52e-40	-1.11279	0.413	0.707	2.15e-36	3/1d	CC	HNRNPH1	down
1.57e-40	-1.01337	0.483	0.742	2.23e-36	3/1d	CC	SFPQ	down
1.69e-40	-1.2411	0.087	0.426	2.39e-36	3/1d	CC	TMEM45A	down
6.9e-39	-1.11766	0.687	0.849	9.79e-35	3/1d	CC	EHF	down
9.43e-39	-1.24997	0.414	0.701	1.34e-34	3/1d	CC	B4GALT5	down
1.18e-38	-1.12313	0.227	0.552	1.68e-34	3/1d	CC	TNIP2	down
4.8e-38	-1.02538	0.315	0.651	6.81e-34	3/1d	CC	LSR	down
5.43e-38	-1.05775	0.1	0.421	7.7e-34	3/1d	CC	SLC28A3	down
6.57e-38	-1.0542	0.649	0.843	9.31e-34	3/1d	CC	TUBA1C	down
2.48e-37	-2.72874	0.544	0.775	3.51e-33	3/1d	CC	SERPINB2	down
1.83e-36	-2.59065	0.149	0.465	2.59e-32	3/1d	CC	HMOX1	down
3.64e-36	-1.0488	0.323	0.638	5.17e-32	3/1d	CC	BAZ1A	down
3.73e-36	-1.093	0.105	0.417	5.3e-32	3/1d	CC	EHD4	down
4.07e-36	-1.53818	0.563	0.758	5.77e-32	3/1d	CC	HSPA5	down
4.98e-36	-1.06314	0.458	0.729	7.06e-32	3/1d	CC	MACF1	down
5.75e-36	-1.31838	0.428	0.708	8.15e-32	3/1d	CC	NFKBIA	down
9.9e-36	-1.23227	0.253	0.611	1.4e-31	3/1d	CC	ENSMFAG00000001838	down
5.66e-35	-1.06129	0.163	0.489	8.03e-31	3/1d	CC	TNFRSF10D	down
5.72e-35	-1.08	0.302	0.596	8.12e-31	3/1d	CC	PSMD12	down
6.88e-35	-1.08088	0.544	0.751	9.75e-31	3/1d	CC	ATF4	down
4.68e-34	-1.09418	0.666	0.834	6.63e-30	3/1d	CC	ENSMFAG00000044835	down
4.69e-34	-1.33112	0.921	0.959	6.65e-30	3/1d	CC	EMP1	down
1.05e-33	-1.00051	0.089	0.387	1.49e-29	3/1d	CC	PHC2	down
2.66e-33	-1.51835	0.035	0.299	3.78e-29	3/1d	CC	DUOXA2	down
1.07e-32	-1.01231	0.03	0.286	1.51e-28	3/1d	CC	DUSP6	down
9.57e-32	-1.03868	0.206	0.506	1.36e-27	3/1d	CC	RAB31	down
1.16e-31	-1.10192	0.079	0.362	1.64e-27	3/1d	CC	RNF39	down
1.8e-31	-1.00776	0.441	0.692	2.55e-27	3/1d	CC	NABP1	down
2.68e-31	-1.0038	0.094	0.38	3.8e-27	3/1d	CC	DDX21	down
7.97e-31	-1.00662	0.285	0.577	1.13e-26	3/1d	CC	TNFRSF1A	down
2.18e-30	-1.01634	0.198	0.493	3.09e-26	3/1d	CC	IL1R1	down
2.18e-30	-1.09059	0.182	0.496	3.09e-26	3/1d	CC	LRG1	down
4.69e-29	-1.07502	0.395	0.655	6.65e-25	3/1d	CC	RNF213	down
9.87e-29	-1.12036	0.274	0.55	1.4e-24	3/1d	CC	TSC22D2	down
4.26e-28	-1.74714	0.6	0.762	6.04e-24	3/1d	CC	PI3	down
1.11e-23	-1.01142	0.152	0.41	1.58e-19	3/1d	CC	ATP10B	down
1.72e-23	-1.61819	0.016	0.197	2.44e-19	3/1d	CC	FST	down
1.96e-20	-1.17332	0.514	0.67	2.78e-16	3/1d	CC	GPX2	down
1.21e-19	-3.26512	0	0.135	1.71e-15	3/1d	CC	SCGB3A1	down
9.7e-18	-1.24233	0.745	0.784	1.38e-13	3/1d	CC	ENSMFAG00000000085	down
1.54e-06	-1.09336	0.453	0.526	0.0218436	3/1d	CC	PLAU	down
2.22e-167	-1.63802	1	0.998	3.15e-163	3/0d	CC	MT-CYTB	down
9.9e-166	-1.55323	1	0.998	1.4e-161	3/0d	CC	MT-COX2	down
1.24e-162	-1.46473	1	0.998	1.77e-158	3/0d	CC	MT-COX3	down
2.01e-158	-1.55168	0.997	0.998	2.85e-154	3/0d	CC	MT-ATP6	down
1.38e-153	-2.01987	0.878	0.996	1.96e-149	3/0d	CC	FOS	down
5.13e-153	-1.52799	0.997	0.996	7.28e-149	3/0d	CC	MT-ND1	down
6.53e-149	-1.63731	0.97	0.998	9.26e-145	3/0d	CC	MT-ND2	down
1.47e-134	-1.46671	0.981	0.995	2.09e-130	3/0d	CC	MT-ND5	down
5.99e-132	-3.58305	0.224	0.857	8.5e-128	3/0d	CC	IGFBP2	down
4.49e-130	-3.43891	0.024	0.734	6.36e-126	3/0d	CC	TNNT3	down
4.04e-128	-2.57296	0.32	0.895	5.73e-124	3/0d	CC	TXNIP	down
3.14e-126	-2.01825	0.794	0.989	4.45e-122	3/0d	CC	ALDH3A1	down
3.19e-118	-1.97591	0.547	0.935	4.53e-114	3/0d	CC	ADH1B	down
9.55e-115	-1.56189	0.955	0.98	1.35e-110	3/0d	CC	JUNB	down
6.94e-111	-1.74015	0.708	0.942	9.84e-107	3/0d	CC	IER2	down
1.1e-108	-2.35378	0.117	0.736	1.56e-104	3/0d	CC	EPAS1	down
[truncated: 347 more rows]
