# Supplementary material for: Long-read single-cell RNA sequencing analysis of key genes and isoforms during corneal wound healing in cynomolgus monkeys
Source: Research Square preprint supplement (doi:10.21203/rs.3.rs-5232061/v1), 2025-03-05
Supplement: Supplementary file 15 [file Supplementary Data4_GO and KEGG analysis of DEGs.xlsx]

## Sheet: GO
ONTOLOGY	ID	Description	GeneRatio	BgRatio	pvalue	p.adjust	qvalue	geneID	Count	celltype	trend
BP	GO:0060429	epithelium development	11/55	446/9280	4.9e-05	0.00612312	0.00553545	SFN/SERPINB5/CYP26B1/UGCG/ST14/BCL10/KRT27/CSTA/EVPL/UPK1B/KRT4	11	TDCE	up
CC	GO:0005615	extracellular space	11/63	479/10372	0.000126433	0.00191455	0.00178717	SERPINB1/SERPINB5/SERPINB2/THBS1/PLAU/S100A9/CSTA/S100A16/CTSD/ECM1/S100A8	11	TDCE	up
CC	GO:0099512	supramolecular fiber	10/63	383/10372	9.31e-05	0.00191455	0.00178717	TUBA1C/TUBB2A/BCL10/KRT23/KRT27/DYNLL1/KRT5/TUBA4A/KRT78/KRT4	10	TDCE	up
CC	GO:0099081	supramolecular polymer	10/63	387/10372	0.000101483	0.00191455	0.00178717	TUBA1C/TUBB2A/BCL10/KRT23/KRT27/DYNLL1/KRT5/TUBA4A/KRT78/KRT4	10	TDCE	up
BP	GO:0098542	defense response to other organism	9/55	424/9280	0.000779447	0.0378589	0.0342253	BCL10/IFNGR1/S100A9/IFI27/DDX60/EVPL/PLAC8/ISG15/S100A8	9	TDCE	up
CC	GO:0045111	intermediate filament cytoskeleton	8/63	95/10372	9.41e-08	4.99e-06	4.66e-06	KRT23/KRT27/KRT5/DDX60/EVPL/KRT78/KRT4/S100A8	8	TDCE	up
BP	GO:0043588	skin development	7/55	109/9280	3.24e-06	0.000946236	0.000855421	SFN/CYP26B1/UGCG/ST14/KRT27/CSTA/EVPL	7	TDCE	up
BP	GO:0008544	epidermis development	7/55	115/9280	4.64e-06	0.000946236	0.000855421	SFN/CYP26B1/UGCG/ST14/KRT27/CSTA/EVPL	7	TDCE	up
BP	GO:0030216	keratinocyte differentiation	6/55	50/9280	4.26e-07	0.000217255	0.000196404	SFN/CYP26B1/UGCG/ST14/CSTA/EVPL	6	TDCE	up
BP	GO:0052547	regulation of peptidase activity	6/55	100/9280	2.55e-05	0.00432979	0.00391424	SFN/THBS1/BCL10/S100A9/ECM1/S100A8	6	TDCE	up
BP	GO:0019221	cytokine-mediated signaling pathway	6/55	148/9280	0.000226385	0.0153942	0.0139167	UGCG/IFNGR1/IFI27/ECM1/ISG15/TXNDC17	6	TDCE	up
MF	GO:0030414	peptidase inhibitor activity	6/68	106/9563	0.000100886	0.0156373	0.0144426	SERPINB1/SERPINB5/SERPINB2/CSTA/CST6/PI3	6	TDCE	up
BP	GO:0018149	peptide cross-linking	5/55	23/9280	1.88e-07	0.000192185	0.00017374	THBS1/CSTA/EVPL/DCN/PI3	5	TDCE	up
CC	GO:0001533	cornified envelope	5/63	16/10372	2.92e-08	3.09e-06	2.89e-06	SERPINB5/DSG3/CSTA/EVPL/PI3	5	TDCE	up
BP	GO:2001235	positive regulation of apoptotic signaling pathway	4/55	62/9280	0.000477435	0.0270547	0.0244581	THBS1/BCL10/S100A9/S100A8	4	TDCE	up
BP	GO:0031639	plasminogen activation	3/55	13/9280	5.4e-05	0.00612312	0.00553545	THBS1/PLAU/S100A10	3	TDCE	up
BP	GO:0061436	establishment of skin barrier	3/55	15/9280	8.52e-05	0.00724482	0.0065495	SFN/CYP26B1/UGCG	3	TDCE	up
BP	GO:0030104	water homeostasis	3/55	29/9280	0.000645425	0.0329167	0.0297575	SFN/CYP26B1/UGCG	3	TDCE	up
BP	GO:0010466	negative regulation of peptidase activity	3/55	33/9280	0.000947706	0.0439391	0.039722	SFN/THBS1/ECM1	3	TDCE	up
MF	GO:0050840	extracellular matrix binding	3/68	19/9563	0.00030715	0.0158694	0.014657	THBS1/ECM1/DCN	3	TDCE	up
MF	GO:0005518	collagen binding	3/68	28/9563	0.000991957	0.0256256	0.0236678	ITGA2/THBS1/DCN	3	TDCE	up
MF	GO:0005200	structural constituent of cytoskeleton	3/68	31/9563	0.00134049	0.0296823	0.0274145	TUBA1C/TUBB2A/TUBA4A	3	TDCE	up
MF	GO:0044877	protein-containing complex binding	16/118	432/9563	7.6e-05	0.0192384	0.0173694	THBS1/CAMSAP2/EIF2S1/LGALS3/STRN3/ITGA2/SPARC/SMARCA5/SRP72/DCN/CDC20/FN1/TAGLN/FSCN1/ITGB6/FLNA	16	TAC	up
MF	GO:0005509	calcium ion binding	14/118	392/9563	0.000320848	0.0302547	0.0273155	THBS1/S100A4/DSG3/CAPN2/PLA2G4A/S100A9/SPARC/S100A2/S100A16/TGM2/S100A13/S100A6/S100A14/S100A8	14	TAC	up
BP	GO:0052547	regulation of peptidase activity	8/108	100/9280	1.99e-05	0.0158041	0.0148363	SFN/THBS1/S100A9/BCL10/BIRC5/ECM1/PRELID1/S100A8	8	TAC	up
CC	GO:0030312	external encapsulating structure	7/116	139/10372	0.000923858	0.0364088	0.0312815	THBS1/LAMC2/SPARC/MMP1/TGM2/ECM1/FN1	7	TAC	up
CC	GO:0031012	extracellular matrix	7/116	139/10372	0.000923858	0.0364088	0.0312815	THBS1/LAMC2/SPARC/MMP1/TGM2/ECM1/FN1	7	TAC	up
BP	GO:0018149	peptide cross-linking	5/108	23/9280	5.54e-06	0.00880772	0.00826836	THBS1/CSTA/DCN/TGM2/FN1	5	TAC	up
MF	GO:0002020	protease binding	5/118	57/9563	0.000659344	0.0417035	0.037652	GSK3B/BCL10/CSTA/ECM1/FN1	5	TAC	up
CC	GO:0098636	protein complex involved in cell adhesion	4/116	26/10372	0.000183614	0.0339686	0.0291849	PLAU/ITGB1/ITGA2/ITGB6	4	TAC	up
CC	GO:0001533	cornified envelope	3/116	16/10372	0.000686412	0.0364088	0.0312815	SERPINB5/DSG3/CSTA	3	TAC	up
CC	GO:0008305	integrin complex	3/116	18/10372	0.000984022	0.0364088	0.0312815	ITGB1/ITGA2/ITGB6	3	TAC	up
CC	GO:0005615	extracellular space	28/205	479/10372	2.3e-07	1.27e-05	1.03e-05	SERPINB1/ANXA2/SERPINB5/S100A16/ANXA1/S100A9/PLAT/PLAU/TIMP1/S100A8/SERPINB2/SPARC/CSTA/FN1/TNFSF10/PTN/CTSD/CTSH/MMP2/SULF2/MMP14/GSN/PSAP/TGFBI/APP/ECM1/THBS1/IGF2	28	LSC	up
BP	GO:0030334	regulation of cell migration	25/192	353/9280	6.32e-08	2.47e-05	2.16e-05	PFN1/LAMA3/LAMC2/SOD2/MAP2K3/PLAU/LMNA/TIMP1/RUFY3/TRIB1/SPAG9/SPARC/FN1/MDK/PTN/CYP1B1/CTSH/MMP14/ITGAV/RRAS/CCN1/APP/CLIC4/ECM1/THBS1	25	LSC	up
BP	GO:0048646	anatomical structure formation involved in morphogenesis	25/192	457/9280	7.59e-06	0.000770891	0.000671911	ITGA2/ANXA2/VEGFA/EPHA2/HK2/WDR1/ITGA3/SPARC/FN1/MDK/CYP1B1/TGM2/CTSH/MMP2/COL5A2/ITGB4/MMP14/ITGAV/RRAS/CCN1/TGFBI/PERP/CLIC4/ECM1/THBS1	25	LSC	up
MF	GO:0005509	calcium ion binding	24/209	392/9563	4.58e-06	0.000322084	0.00029473	S100A2/ANXA2/S100A16/ANXA1/MACF1/EFHD2/GJB2/ANXA5/EHD4/S100A9/DSG3/CAPN2/S100A14/S100A8/S100A4/SPARC/TGM2/SRI/SULF2/GSN/FBLN2/DSC2/S100A6/THBS1	24	LSC	up
MF	GO:0044877	protein-containing complex binding	24/209	432/9563	2.34e-05	0.000906626	0.000829628	ITGA2/YBX3/FSCN1/EZR/LGALS3/LASP1/SPARC/FN1/TAGLN/CAPG/PTN/DSTN/FLNA/GSN/ITGAV/RRAS/CCN1/TGFBI/ATP5IF1/ITGB6/THBS1/SEC61G/MYH9/ARPC3	24	LSC	up
BP	GO:0033043	regulation of organelle organization	23/192	493/9280	0.000207786	0.00703832	0.00613462	S100A10/ANXA2/PFN1/SLC25A5/ARPC5L/GNL3/EZR/PDCD5/CAPN2/LMNA/PLAUR/PFDN2/WDR1/TNFSF10/ARPC1B/MDK/CAPG/DSTN/TOM1L1/ARPC2/GSN/ATP5IF1/ARPC3	23	LSC	up
MF	GO:0003779	actin binding	22/209	219/9563	2.09e-09	7.35e-07	6.72e-07	PFN1/TMSB10/MACF1/FSCN1/MSN/EZR/TPM4/LASP1/MTSS1/TPM1/CALD1/TAGLN/ARPC1B/CAPG/TPM2/DSTN/FLNA/ARPC2/GSN/FXYD5/MYH9/ARPC3	22	LSC	up
CC	GO:0005730	nucleolus	21/205	450/10372	0.000221228	0.00405585	0.00330678	TOP1/S100A16/GJB4/NCL/GNL3/EZR/WDR43/LYAR/RRP9/NOP16/GTPBP4/SNU13/PA2G4/NOP56/RCL1/TRAF4/VMP1/NOP58/CAPG/ITGB4/TAX1BP3	21	LSC	up
BP	GO:0001944	vasculature development	20/192	286/9280	1.77e-06	0.000269617	0.000234999	ANXA2/FOSL1/VEGFA/SOD2/EPHA2/ZFAND5/HK2/SPARC/ANGPTL7/MDK/CYP1B1/CTSH/MMP2/ITGAV/RRAS/CCN1/TGFBI/CLIC4/ECM1/THBS1	20	LSC	up
BP	GO:0097435	supramolecular fiber organization	20/192	300/9280	3.69e-06	0.000479899	0.000418281	S100A10/ANXA2/PFN1/TMSB10/FSCN1/ARPC5L/ZYX/EZR/PFDN2/WDR1/DSP/ARPC1B/CAPG/CYP1B1/DSTN/COL5A2/ARPC2/GSN/APP/ARPC3	20	LSC	up
BP	GO:0051336	regulation of hydrolase activity	19/192	289/9280	8e-06	0.000776213	0.00067655	MT3/S100A10/SFN/S100A9/CAST/EPHA2/NET1/PDCD5/TIMP1/PLAUR/S100A8/TNFSF10/GSN/TAX1BP3/CCN1/ATP5IF1/PERP/ECM1/THBS1	19	LSC	up
BP	GO:0030335	positive regulation of cell migration	18/192	190/9280	6.87e-08	2.47e-05	2.16e-05	PFN1/LAMC2/SOD2/MAP2K3/PLAU/RUFY3/SPAG9/SPARC/FN1/MDK/PTN/CTSH/MMP14/ITGAV/RRAS/CCN1/APP/THBS1	18	LSC	up
BP	GO:0040017	positive regulation of locomotion	18/192	205/9280	2.19e-07	5.34e-05	4.65e-05	PFN1/LAMC2/SOD2/MAP2K3/PLAU/RUFY3/SPAG9/SPARC/FN1/MDK/PTN/CTSH/MMP14/ITGAV/RRAS/CCN1/APP/THBS1	18	LSC	up
BP	GO:0030029	actin filament-based process	18/192	328/9280	0.000149247	0.00587725	0.00512263	S100A10/PFN1/TMSB10/FSCN1/ARPC5L/ZYX/EZR/WDR1/MTSS1/DSP/ARPC1B/MDK/CAPG/DSTN/FLNA/ARPC2/GSN/ARPC3	18	LSC	up
CC	GO:0030312	external encapsulating structure	18/205	139/10372	2.28e-10	3.14e-08	2.56e-08	ANXA2/MMP1/MMP10/LAMC2/TIMP1/SPARC/FN1/TGM2/MMP2/COL5A2/ITGB4/MMP14/FBLN2/TGFBI/MFAP2/MMP13/ECM1/THBS1	18	LSC	up
CC	GO:0031012	extracellular matrix	18/205	139/10372	2.28e-10	3.14e-08	2.56e-08	ANXA2/MMP1/MMP10/LAMC2/TIMP1/SPARC/FN1/TGM2/MMP2/COL5A2/ITGB4/MMP14/FBLN2/TGFBI/MFAP2/MMP13/ECM1/THBS1	18	LSC	up
BP	GO:0097190	apoptotic signaling pathway	17/192	240/9280	9.27e-06	0.000860293	0.000749834	SFN/YBX3/SLC25A5/S100A9/SOD2/PDCD5/LMNA/PLAUR/S100A8/TNFSF10/CYP1B1/CTSH/ITGAV/ATP5IF1/PERP/THBS1/IFI27	17	LSC	up
BP	GO:0043066	negative regulation of apoptotic process	16/192	343/9280	0.00198456	0.0323287	0.0281777	MT3/SFN/YBX3/SLC25A5/HYPK/SOD2/CAST/LMNA/PLAUR/SERPINB2/MDK/CTSH/GLO1/ITGAV/CCN1/THBS1	16	LSC	up
BP	GO:0001525	angiogenesis	15/192	202/9280	1.82e-05	0.00143696	0.00125246	ANXA2/VEGFA/EPHA2/HK2/SPARC/MDK/CYP1B1/CTSH/ITGAV/RRAS/CCN1/TGFBI/CLIC4/ECM1/THBS1	15	LSC	up
BP	GO:0098609	cell-cell adhesion	15/192	316/9280	0.00231065	0.0354743	0.0309195	EZR/S100A9/DSG3/VMP1/PLAUR/SLC7A1/S100A8/CSTA/DSP/MDK/CYP1B1/ITGAV/CCN1/DSC2/PERP	15	LSC	up
CC	GO:0009986	cell surface	15/205	274/10372	0.00034838	0.00563556	0.00459473	ITGA2/ANXA2/PLAT/PLAU/PLAUR/ITGB1/ITGA3/SPARC/SULF2/ITGB4/ITGAV/ATP5IF1/APP/CLIC4/THBS1	15	LSC	up
BP	GO:0052547	regulation of peptidase activity	14/192	100/9280	1.52e-08	2.47e-05	2.16e-05	MT3/SFN/S100A9/CAST/PDCD5/TIMP1/PLAUR/S100A8/TNFSF10/GSN/CCN1/PERP/ECM1/THBS1	14	LSC	up
BP	GO:0007015	actin filament organization	14/192	183/9280	2.5e-05	0.00177728	0.00154908	S100A10/PFN1/TMSB10/FSCN1/ARPC5L/ZYX/EZR/WDR1/ARPC1B/CAPG/DSTN/ARPC2/GSN/ARPC3	14	LSC	up
BP	GO:0043065	positive regulation of apoptotic process	14/192	186/9280	3e-05	0.00206287	0.001798	S100A9/SOD2/STK17A/NET1/PDCD5/DUSP6/S100A8/TNFSF10/CYP1B1/TGM2/CTSH/GSN/CCN1/THBS1	14	LSC	up
BP	GO:0008285	negative regulation of cell population proliferation	14/192	276/9280	0.00174725	0.0295924	0.0257928	SFN/SOD2/PDCD5/LMNA/TRIB1/ETV3/SPARC/PTN/CYP1B1/TAX1BP3/ATP5IF1/APP/THBS1/CDKN2B	14	LSC	up
BP	GO:0031589	cell-substrate adhesion	13/192	138/9280	5.21e-06	0.000582752	0.000507928	S100A10/ZYX/PLAU/ITGB1/FN1/MDK/ITGB4/ITGAV/FBLN2/RRAS/CCN1/ITGB6/THBS1	13	LSC	up
BP	GO:0048729	tissue morphogenesis	13/192	252/9280	0.00218858	0.0343415	0.0299321	ITGA2/SERPINB5/EPHA2/WDR1/ITGA3/DSP/MDK/TGM2/CTSH/ITGB4/MMP14/CCN1/CLIC4	13	LSC	up
BP	GO:2000116	regulation of cysteine-type endopeptidase activity	12/192	76/9280	4.25e-08	2.47e-05	2.16e-05	MT3/SFN/S100A9/CAST/PDCD5/PLAUR/S100A8/TNFSF10/GSN/CCN1/PERP/THBS1	12	LSC	up
BP	GO:1902903	regulation of supramolecular fiber organization	12/192	156/9280	9.1e-05	0.00485549	0.00423206	S100A10/PFN1/ARPC5L/PFDN2/WDR1/ARPC1B/CAPG/DSTN/ARPC2/GSN/APP/ARPC3	12	LSC	up
BP	GO:0032970	regulation of actin filament-based process	12/192	161/9280	0.000123146	0.00559135	0.00487344	S100A10/PFN1/ARPC5L/WDR1/DSP/ARPC1B/MDK/CAPG/DSTN/ARPC2/GSN/ARPC3	12	LSC	up
BP	GO:0001667	ameboidal-type cell migration	12/192	170/9280	0.000205802	0.00703832	0.00613462	S100A2/PFN1/MAP2K3/ZFAND5/TIMP1/SPARC/FN1/CYP1B1/CTSH/ITGB4/RRAS/THBS1	12	LSC	up
MF	GO:0061134	peptidase regulator activity	12/209	121/9563	1.25e-05	0.000629804	0.000576316	MT3/SERPINB1/ANXA2/SERPINB5/CAST/TIMP1/PI3/SERPINB2/CSTA/FN1/CTSH/APP	12	LSC	up
BP	GO:0032535	regulation of cellular component size	11/192	137/9280	0.000122258	0.00559135	0.00487344	MT3/PFN1/ARPC5L/WDR1/FN1/ARPC1B/CAPG/DSTN/ARPC2/GSN/ARPC3	11	LSC	up
BP	GO:0051345	positive regulation of hydrolase activity	11/192	167/9280	0.000680252	0.016394	0.014289	S100A10/S100A9/EPHA2/NET1/PDCD5/S100A8/TNFSF10/GSN/TAX1BP3/CCN1/PERP	11	LSC	up
BP	GO:0050673	epithelial cell proliferation	11/192	185/9280	0.00157201	0.0284172	0.0247685	SFN/SERPINB5/EPHA2/SPARC/MDK/PTN/SULF2/ATP5IF1/ECM1/THBS1/CDKN2B	11	LSC	up
BP	GO:0090066	regulation of anatomical structure size	11/192	192/9280	0.00211111	0.033873	0.0295238	MT3/PFN1/ARPC5L/WDR1/FN1/ARPC1B/CAPG/DSTN/ARPC2/GSN/ARPC3	11	LSC	up
MF	GO:0050839	cell adhesion molecule binding	11/209	82/9563	1.5e-06	0.000254625	0.000233	ITGA2/EZR/FN1/DSP/PTN/ITGAV/CCN1/FXYD5/TGFBI/ITGB6/THBS1	11	LSC	up
BP	GO:0007229	integrin-mediated signaling pathway	10/192	51/9280	6.95e-08	2.47e-05	2.16e-05	ITGA2/ZYX/TIMP1/ITGB1/ITGA3/FN1/PTN/ITGB4/ITGAV/ITGB6	10	LSC	up
BP	GO:0030198	extracellular matrix organization	10/192	118/9280	0.000159738	0.00587725	0.00512263	ANXA2/SERPINB5/ANGPTL7/CYP1B1/SULF2/COL5A2/FBLN2/CCN1/TGFBI/APP	10	LSC	up
BP	GO:0043062	extracellular structure organization	10/192	118/9280	0.000159738	0.00587725	0.00512263	ANXA2/SERPINB5/ANGPTL7/CYP1B1/SULF2/COL5A2/FBLN2/CCN1/TGFBI/APP	10	LSC	up
BP	GO:0045229	external encapsulating structure organization	10/192	118/9280	0.000159738	0.00587725	0.00512263	ANXA2/SERPINB5/ANGPTL7/CYP1B1/SULF2/COL5A2/FBLN2/CCN1/TGFBI/APP	10	LSC	up
BP	GO:0050678	regulation of epithelial cell proliferation	10/192	153/9280	0.00126031	0.0246919	0.0215215	SFN/SERPINB5/SPARC/MDK/PTN/SULF2/ATP5IF1/ECM1/THBS1/CDKN2B	10	LSC	up
CC	GO:0030055	cell-substrate junction	10/205	86/10372	7e-06	0.000274915	0.000224141	ITGA2/ZYX/EZR/TNS4/EPHA2/ITGB1/LASP1/ITGB4/GSN/ITGAV	10	LSC	up
BP	GO:0008064	regulation of actin polymerization or depolymerization	9/192	74/9280	1.99e-05	0.00146774	0.00127929	PFN1/ARPC5L/WDR1/ARPC1B/CAPG/DSTN/ARPC2/GSN/ARPC3	9	LSC	up
BP	GO:0030832	regulation of actin filament length	9/192	74/9280	1.99e-05	0.00146774	0.00127929	PFN1/ARPC5L/WDR1/ARPC1B/CAPG/DSTN/ARPC2/GSN/ARPC3	9	LSC	up
BP	GO:0070371	ERK1 and ERK2 cascade	9/192	118/9280	0.000738948	0.0169561	0.014779	MT3/EZR/DUSP6/FN1/CTSH/ITGAV/RRAS/CCN1/APP	9	LSC	up
CC	GO:0045177	apical part of cell	9/205	154/10372	0.00346387	0.0411914	0.0335838	ANXA1/EZR/PLAT/SLC7A1/FN1/ATP1B1/CA2/APP/CLIC4	9	LSC	up
BP	GO:0031638	zymogen activation	8/192	26/9280	3.3e-08	2.47e-05	2.16e-05	S100A10/ANXA2/PLAT/PLAU/CTSH/MMP14/PERP/THBS1	8	LSC	up
BP	GO:0008637	apoptotic mitochondrial changes	8/192	43/9280	2.26e-06	0.000321934	0.000280598	SFN/SLC25A5/HK2/PDCD5/LMNA/PLAUR/TNFSF10/ATP5IF1	8	LSC	up
BP	GO:0001704	formation of primary germ layer	8/192	52/9280	1e-05	0.000890447	0.000776116	ITGA2/ITGA3/FN1/MMP2/COL5A2/ITGB4/MMP14/ITGAV	8	LSC	up
BP	GO:0051346	negative regulation of hydrolase activity	8/192	75/9280	0.000149603	0.00587725	0.00512263	MT3/SFN/CAST/TIMP1/PLAUR/ATP5IF1/ECM1/THBS1	8	LSC	up
BP	GO:0010810	regulation of cell-substrate adhesion	8/192	83/9280	0.000303823	0.00944659	0.00823367	S100A10/PLAU/FN1/MDK/FBLN2/RRAS/CCN1/THBS1	8	LSC	up
BP	GO:0009205	purine ribonucleoside triphosphate metabolic process	8/192	90/9280	0.00052797	0.0140836	0.0122753	RAN/GAPDH/PGAM1/HK2/ATP5F1E/ATP5IF1/APP/ENO1	8	LSC	up
BP	GO:0072593	reactive oxygen species metabolic process	8/192	90/9280	0.00052797	0.0140836	0.0122753	MT3/SOD2/STK17A/HK2/CYP1B1/CCN1/ATP5IF1/THBS1	8	LSC	up
BP	GO:0043588	skin development	8/192	109/9280	0.00185468	0.0305045	0.0265878	SFN/UGCG/ITGA3/CSTA/DSP/COL5A2/ITGB4/CLIC4	8	LSC	up
BP	GO:0090132	epithelium migration	8/192	120/9280	0.0033849	0.046905	0.0408825	S100A2/PFN1/MAP2K3/SPARC/CYP1B1/CTSH/RRAS/THBS1	8	LSC	up
CC	GO:0098636	protein complex involved in cell adhesion	8/205	26/10372	2.34e-08	1.61e-06	1.31e-06	ITGA2/PLAU/PLAUR/ITGB1/ITGA3/ITGB4/ITGAV/ITGB6	8	LSC	up
CC	GO:0045178	basal part of cell	8/205	87/10372	0.000311629	0.00535612	0.0043669	ITGA2/ANXA2/ANXA1/SLC4A7/SLC7A1/ITGA3/DSP/ITGB4	8	LSC	up
MF	GO:1901681	sulfur compound binding	8/209	98/9563	0.00132915	0.0311907	0.0285417	VEGFA/PDCD5/FN1/MDK/PTN/DBI/APP/THBS1	8	LSC	up
BP	GO:0010466	negative regulation of peptidase activity	7/192	33/9280	3.94e-06	0.000479899	0.000418281	MT3/SFN/CAST/TIMP1/PLAUR/ECM1/THBS1	7	LSC	up
BP	GO:2001056	positive regulation of cysteine-type endopeptidase activity	7/192	45/9280	3.39e-05	0.00219379	0.00191211	S100A9/PDCD5/S100A8/TNFSF10/GSN/CCN1/PERP	7	LSC	up
BP	GO:0046034	ATP metabolic process	7/192	75/9280	0.0008801	0.0199801	0.0174147	GAPDH/PGAM1/HK2/ATP5F1E/ATP5IF1/APP/ENO1	7	LSC	up
BP	GO:0032271	regulation of protein polymerization	7/192	80/9280	0.00129166	0.0248325	0.0216441	PFN1/ARPC5L/ARPC1B/CAPG/ARPC2/GSN/ARPC3	7	LSC	up
CC	GO:0001533	cornified envelope	7/205	16/10372	1.05e-08	9.59e-07	7.82e-07	ANXA2/SERPINB5/DSG3/PI3/CSTA/DSP/DSC2	7	LSC	up
CC	GO:0009925	basal plasma membrane	7/205	82/10372	0.00115437	0.016708	0.0136222	ANXA2/ANXA1/SLC4A7/SLC7A1/ITGA3/DSP/ITGB4	7	LSC	up
MF	GO:0005178	integrin binding	7/209	41/9563	2.58e-05	0.000906626	0.000829628	FN1/PTN/ITGAV/CCN1/TGFBI/ITGB6/THBS1	7	LSC	up
MF	GO:0008201	heparin binding	7/209	60/9563	0.000311433	0.00843264	0.00771647	VEGFA/PDCD5/FN1/MDK/PTN/APP/THBS1	7	LSC	up
MF	GO:0008083	growth factor activity	7/209	83/9563	0.00219407	0.0454302	0.0415719	VEGFA/AREG/HBEGF/TIMP1/MDK/PTN/IGF2	7	LSC	up
BP	GO:0018149	peptide cross-linking	6/192	23/9280	5.46e-06	0.000582752	0.000507928	PI3/CSTA/FN1/DSP/TGM2/THBS1	6	LSC	up
BP	GO:0021782	glial cell development	6/192	39/9280	0.000134015	0.00587725	0.00512263	MT3/NDRG1/S100A8/MDK/ITGB4/APP	6	LSC	up
BP	GO:0022612	gland morphogenesis	6/192	49/9280	0.000483892	0.0133863	0.0116675	SERPINB5/EPHA2/MDK/PTN/TGM2/SULF2	6	LSC	up
BP	GO:0016052	carbohydrate catabolic process	6/192	62/9280	0.00170369	0.0290854	0.0253509	GAPDH/PGAM1/HK2/PYGL/APP/ENO1	6	LSC	up
CC	GO:0008305	integrin complex	6/205	18/10372	8.44e-07	3.87e-05	3.15e-05	ITGA2/ITGB1/ITGA3/ITGB4/ITGAV/ITGB6	6	LSC	up
CC	GO:0042470	melanosome	6/205	40/10372	0.000121394	0.00238452	0.00194413	RAN/HSP90B1/SLC1A5/ITGB1/CAPG/MMP14	6	LSC	up
CC	GO:0048770	pigment granule	6/205	40/10372	0.000121394	0.00238452	0.00194413	RAN/HSP90B1/SLC1A5/ITGB1/CAPG/MMP14	6	LSC	up
MF	GO:0050840	extracellular matrix binding	6/209	19/9563	2.17e-06	0.000254625	0.000233	ITGAV/FBLN2/CCN1/TGFBI/ECM1/THBS1	6	LSC	up
MF	GO:0002020	protease binding	6/209	57/9563	0.00145423	0.031993	0.0292759	ANXA2/ITGA3/CSTA/FN1/ITGAV/ECM1	6	LSC	up
BP	GO:0033627	cell adhesion mediated by integrin	5/192	28/9280	0.000240115	0.00788315	0.00687097	ITGA2/EPHA2/PLAU/CYP1B1/ITGAV	5	LSC	up
BP	GO:0007492	endoderm development	5/192	34/9280	0.000614783	0.0154347	0.0134529	FN1/MMP2/COL5A2/MMP14/ITGAV	5	LSC	up
BP	GO:0006096	glycolytic process	5/192	35/9280	0.000705344	0.016394	0.014289	GAPDH/PGAM1/HK2/APP/ENO1	5	LSC	up
BP	GO:0006757	ATP generation from ADP	5/192	35/9280	0.000705344	0.016394	0.014289	GAPDH/PGAM1/HK2/APP/ENO1	5	LSC	up
BP	GO:0007565	female pregnancy	5/192	42/9280	0.00164434	0.0287626	0.0250696	VMP1/TIMP1/PTN/MMP2/ITGB4	5	LSC	up
BP	GO:0046939	nucleotide phosphorylation	5/192	45/9280	0.0022465	0.0347393	0.0302789	GAPDH/PGAM1/HK2/APP/ENO1	5	LSC	up
BP	GO:0006090	pyruvate metabolic process	5/192	46/9280	0.00247885	0.0369921	0.0322424	GAPDH/PGAM1/HK2/APP/ENO1	5	LSC	up
BP	GO:2000377	regulation of reactive oxygen species metabolic process	5/192	47/9280	0.00272818	0.0401512	0.0349959	MT3/STK17A/HK2/CYP1B1/THBS1	5	LSC	up
BP	GO:0044706	multi-multicellular organism process	5/192	49/9280	0.00328055	0.0460555	0.0401421	VMP1/TIMP1/PTN/MMP2/ITGB4	5	LSC	up
BP	GO:0030216	keratinocyte differentiation	5/192	50/9280	0.003585	0.0493573	0.04302	SFN/UGCG/CSTA/DSP/CLIC4	5	LSC	up
BP	GO:0031579	membrane raft organization	4/192	14/9280	0.000151104	0.00587725	0.00512263	S100A10/ANXA2/CAV1/GSN	4	LSC	up
BP	GO:0050819	negative regulation of coagulation	4/192	24/9280	0.00136413	0.025669	0.0223732	ANXA2/ANXA5/PLAU/THBS1	4	LSC	up
BP	GO:0071709	membrane assembly	4/192	25/9280	0.00159797	0.0284172	0.0247685	S100A10/ANXA2/UGCG/CAV1	4	LSC	up
BP	GO:0090559	regulation of membrane permeability	4/192	25/9280	0.00159797	0.0284172	0.0247685	MT3/SLC25A5/HK2/ATP5IF1	4	LSC	up
BP	GO:0044091	membrane biogenesis	4/192	27/9280	0.00214658	0.0339319	0.0295752	S100A10/ANXA2/UGCG/CAV1	4	LSC	up
BP	GO:1990266	neutrophil migration	4/192	30/9280	0.00319394	0.0460555	0.0401421	S100A9/WDR1/S100A8/MDK	4	LSC	up
CC	GO:0005885	Arp2/3 protein complex	4/205	10/10372	2.84e-05	0.000809188	0.00065974	ARPC5L/ARPC1B/ARPC2/ARPC3	4	LSC	up
BP	GO:0030574	collagen catabolic process	3/192	10/9280	0.000939921	0.0204673	0.0178393	MMP2/MMP14/MMP13	3	LSC	up
BP	GO:0070141	response to UV-A	3/192	10/9280	0.000939921	0.0204673	0.0178393	MMP1/TIMP1/MMP2	3	LSC	up
BP	GO:0042730	fibrinolysis	3/192	11/9280	0.00127278	0.0246919	0.0215215	ANXA2/PLAU/THBS1	3	LSC	up
BP	GO:1990000	amyloid fibril formation	3/192	14/9280	0.00268215	0.039748	0.0346445	PFDN2/GSN/APP	3	LSC	up
BP	GO:0043277	apoptotic cell clearance	3/192	15/9280	0.00330201	0.0460555	0.0401421	TGM2/ITGAV/THBS1	3	LSC	up
BP	GO:0048333	mesodermal cell differentiation	3/192	15/9280	0.00330201	0.0460555	0.0401421	ITGA2/ITGA3/ITGB4	3	LSC	up
CC	GO:0005732	sno(s)RNA-containing ribonucleoprotein complex	3/205	13/10372	0.00187988	0.0258483	0.0210744	RRP9/NOP56/NOP58	3	LSC	up
MF	GO:0030515	snoRNA binding	3/209	13/9563	0.00250304	0.0489484	0.0447913	RRP9/NOP56/NOP58	3	LSC	up
CC	GO:0005615	extracellular space	27/136	479/10372	9.06e-11	1.69e-08	1.52e-08	SERPINB1/S100A9/S100A8/ANXA1/CXCL17/SERPINB5/SERPINB2/PIP/LRG1/PLAU/PLAT/ECM1/SERPINA3/CXCL6/CXCL8/CCL20/TIMP1/CSTA/CTSD/ARG1/TNFSF10/SERPINB6/CTSH/S100A16/FN1/SPP1/CXCL1	27	CC	up
BP	GO:0060429	epithelium development	17/120	446/9280	5.59e-05	0.00839827	0.00723296	UGCG/SERPINB5/SFN/ALDH1A3/ST14/EZR/TGM2/RAP1B/PLS1/SULT2B1/EHF/LRG1/BCL10/CSTA/MDK/CTSH/UPK1B	17	CC	up
MF	GO:0005509	calcium ion binding	17/130	392/9563	2.13e-05	0.00080172	0.000699519	S100A9/S100A8/ANXA1/ANXA5/TGM2/PADI1/PLS1/S100A2/EHD4/MACF1/GJB2/DSG3/PRRG4/S100A14/S100A16/S100A6/S100A4	17	CC	up
BP	GO:0040012	regulation of locomotion	16/120	397/9280	4.87e-05	0.00839827	0.00723296	CXCL17/SOD2/PFN1/IL1R1/DUOXA2/PLAU/LAMC2/ECM1/CXCL8/TIMP1/MDK/CYP1B1/CTSH/DCN/FN1/IFITM1	16	CC	up
BP	GO:2000145	regulation of cell motility	15/120	377/9280	9.87e-05	0.0113589	0.00978282	CXCL17/SOD2/PFN1/IL1R1/DUOXA2/PLAU/LAMC2/ECM1/TIMP1/MDK/CYP1B1/CTSH/DCN/FN1/IFITM1	15	CC	up
BP	GO:0006954	inflammatory response	14/120	284/9280	1.67e-05	0.00412048	0.00354874	S100A9/S100A8/CXCL17/IL4R/IL1R1/DUOXA2/ECM1/CXCL6/CXCL8/CCL20/TIMP1/MDK/FN1/CXCL1	14	CC	up
MF	GO:0003779	actin binding	13/130	219/9563	8.21e-06	0.000415077	0.000362165	TMSB10/EZR/CNN3/PLS1/MACF1/PFN1/MYO1B/TPM4/MARCKSL1/ARPC1B/DSTN/TPM1/CALD1	13	CC	up
MF	GO:0061134	peptidase regulator activity	12/130	121/9563	7.95e-08	2.09e-05	1.83e-05	SERPINB1/PI3/SERPINB5/SERPINB2/WFDC2/SERPINA3/TIMP1/MT3/CSTA/SERPINB6/CTSH/FN1	12	CC	up
BP	GO:0040017	positive regulation of locomotion	11/120	205/9280	6.62e-05	0.00839827	0.00723296	CXCL17/SOD2/PFN1/IL1R1/DUOXA2/PLAU/LAMC2/CXCL8/MDK/CTSH/FN1	11	CC	up
BP	GO:0010942	positive regulation of cell death	10/120	212/9280	0.000407437	0.0281458	0.0242404	S100A9/S100A8/ALDH1A3/TGM2/SOD2/BCL10/MT3/TNFSF10/CYP1B1/CTSH	10	CC	up
BP	GO:0097190	apoptotic signaling pathway	10/120	240/9280	0.00106753	0.0449665	0.0387271	S100A9/S100A8/SFN/IFI27/SOD2/PLAUR/BCL10/TNFSF10/CYP1B1/CTSH	10	CC	up
BP	GO:0052547	regulation of peptidase activity	9/120	100/9280	5.3e-06	0.00228876	0.00197118	S100A9/S100A8/SFN/PLAUR/BCL10/ECM1/TIMP1/MT3/TNFSF10	9	CC	up
BP	GO:0019221	cytokine-mediated signaling pathway	8/120	148/9280	0.000645531	0.0358639	0.0308876	UGCG/IFI27/IL1R1/ECM1/MT3/TXNDC17/ARG1/ISG15	8	CC	up
CC	GO:0045177	apical part of cell	8/136	154/10372	0.000931864	0.0435646	0.0389911	ANXA1/EZR/ATP1B1/DUOXA2/PLAT/FN1/RHCG/UPK1B	8	CC	up
MF	GO:0005126	cytokine receptor binding	8/130	140/9563	0.000625387	0.0164477	0.014351	LRG1/ECM1/CLCF1/CXCL6/CXCL8/CCL20/TNFSF10/CXCL1	8	CC	up
BP	GO:0097530	granulocyte migration	7/120	42/9280	9.4e-07	0.00134202	0.00115581	S100A9/S100A8/CXCL17/IL1R1/CXCL6/CXCL8/MDK	7	CC	up
MF	GO:0005125	cytokine activity	7/130	106/9563	0.000582612	0.0164477	0.014351	CLCF1/CXCL6/CXCL8/CCL20/TIMP1/TNFSF10/CXCL1	7	CC	up
BP	GO:1990266	neutrophil migration	6/120	30/9280	1.9e-06	0.00134202	0.00115581	S100A9/S100A8/IL1R1/CXCL6/CXCL8/MDK	6	CC	up
BP	GO:0071621	granulocyte chemotaxis	6/120	31/9280	2.33e-06	0.00134202	0.00115581	S100A9/S100A8/CXCL17/CXCL6/CXCL8/MDK	6	CC	up
BP	GO:0045766	positive regulation of angiogenesis	6/120	66/9280	0.000199001	0.0163655	0.0140946	LRG1/ECM1/CXCL8/MDK/CYP1B1/CTSH	6	CC	up
BP	GO:1904018	positive regulation of vasculature development	6/120	66/9280	0.000199001	0.0163655	0.0140946	LRG1/ECM1/CXCL8/MDK/CYP1B1/CTSH	6	CC	up
BP	GO:0009913	epidermal cell differentiation	6/120	73/9280	0.000346433	0.0249288	0.0214698	UGCG/SFN/ST14/PLS1/SULT2B1/CSTA	6	CC	up
MF	GO:0050839	cell adhesion molecule binding	6/130	82/9563	0.000845831	0.020223	0.0176451	ITGA2/EZR/FN1/SPP1/ITGB6/ISG15	6	CC	up
MF	GO:0004252	serine-type endopeptidase activity	6/130	105/9563	0.00301728	0.0495965	0.0432741	TMPRSS11D/ST14/TMPRSS2/PLAU/PLAT/CTSH	6	CC	up
BP	GO:0018149	peptide cross-linking	5/120	23/9280	9.29e-06	0.00267331	0.00230237	PI3/TGM2/CSTA/DCN/FN1	5	CC	up
BP	GO:0010466	negative regulation of peptidase activity	5/120	33/9280	5.91e-05	0.00839827	0.00723296	SFN/PLAUR/ECM1/TIMP1/MT3	5	CC	up
BP	GO:0021782	glial cell development	5/120	39/9280	0.000134711	0.0142686	0.0122888	S100A8/NDRG1/B4GALT5/MT3/MDK	5	CC	up
BP	GO:0007229	integrin-mediated signaling pathway	5/120	51/9280	0.000485742	0.0317268	0.0273245	ITGA2/TIMP1/FN1/ITGB6/ISG15	5	CC	up
BP	GO:2001235	positive regulation of apoptotic signaling pathway	5/120	62/9280	0.0011952	0.0491454	0.0423262	S100A9/S100A8/BCL10/TNFSF10/CTSH	5	CC	up
MF	GO:0002020	protease binding	5/130	57/9563	0.00102179	0.0223942	0.0195395	IL1R1/BCL10/ECM1/CSTA/FN1	5	CC	up
BP	GO:0031638	zymogen activation	4/120	26/9280	0.000319009	0.0239534	0.0206297	S100A10/PLAU/PLAT/CTSH	4	CC	up
CC	GO:0001533	cornified envelope	4/136	16/10372	4.55e-05	0.00425858	0.00381151	PI3/SERPINB5/DSG3/CSTA	4	CC	up
CC	GO:0098636	protein complex involved in cell adhesion	4/136	26/10372	0.000337929	0.0210643	0.0188529	ITGA2/PLAUR/PLAU/ITGB6	4	CC	up
MF	GO:0005178	integrin binding	4/130	41/9563	0.00223728	0.039227	0.0342265	FN1/SPP1/ITGB6/ISG15	4	CC	up
BP	GO:0061436	establishment of skin barrier	3/120	15/9280	0.000856526	0.0408125	0.0351495	UGCG/SFN/LSR	3	CC	up
BP	GO:0030334	regulation of cell migration	13/75	353/9280	4.18e-06	0.000945933	0.000826953	PLAU/THBS1/LAMC2/LAMA3/RRAS2/DCN/IGFBP5/FN1/ITGAV/PTN/ECM1/CYP1B1/CLIC4	13	BC	up
BP	GO:0040012	regulation of locomotion	13/75	397/9280	1.49e-05	0.00224917	0.00196627	PLAU/THBS1/LAMC2/LAMA3/RRAS2/DCN/IGFBP5/FN1/ITGAV/PTN/ECM1/CYP1B1/CLIC4	13	BC	up
CC	GO:0005615	extracellular space	12/90	479/10372	0.000843377	0.016988	0.0126824	PLAU/SERPINB1/SERPINB5/ANXA1/THBS1/CSTA/S100A16/IGFBP5/FN1/PTN/ECM1/SERPINE2	12	BC	up
MF	GO:0044877	protein-containing complex binding	12/86	432/9563	0.000453942	0.00767918	0.00657021	THBS1/ITGA2/FSCN1/MDM2/DCN/TAGLN/EVPL/FN1/ITGAV/CAPG/PTN/ITGB6	12	BC	up
BP	GO:0060429	epithelium development	11/75	446/9280	0.000844042	0.0394953	0.0345276	SFN/CYP26B1/SERPINB5/UGCG/KRT27/TGM2/CSTA/TAGLN/EVPL/IGFBP5/CLIC4	11	BC	up
MF	GO:0003779	actin binding	10/86	219/9563	2.5e-05	0.00123377	0.0010556	FSCN1/TMSB10/TPM1/TAGLN/FXYD5/CALD1/CAPG/ARPC2/ARPC1B/SPTBN1	10	BC	up
BP	GO:0044092	negative regulation of molecular function	9/75	309/9280	0.00081438	0.0394684	0.034504	SFN/THBS1/MT3/GEM/NFKBIA/TIMP3/ITGAV/ECM1/CYP1B1	9	BC	up
CC	GO:0030312	external encapsulating structure	9/90	139/10372	3.03e-06	0.000142305	0.000106237	THBS1/LAMC2/MMP1/TGM2/TIMP3/FN1/CCDC80/ECM1/MMP10	9	BC	up
CC	GO:0031012	extracellular matrix	9/90	139/10372	3.03e-06	0.000142305	0.000106237	THBS1/LAMC2/MMP1/TGM2/TIMP3/FN1/CCDC80/ECM1/MMP10	9	BC	up
BP	GO:0043588	skin development	8/75	109/9280	2.46e-06	0.000945933	0.000826953	SFN/CYP26B1/UGCG/KRT27/CSTA/EVPL/IGFBP5/CLIC4	8	BC	up
BP	GO:0008544	epidermis development	8/75	115/9280	3.68e-06	0.000945933	0.000826953	SFN/CYP26B1/UGCG/KRT27/CSTA/EVPL/IGFBP5/CLIC4	8	BC	up
MF	GO:0050839	cell adhesion molecule binding	7/86	82/9563	8.19e-06	0.000831146	0.000711118	THBS1/ITGA2/FXYD5/FN1/ITGAV/PTN/ITGB6	7	BC	up
MF	GO:0061134	peptidase regulator activity	7/86	121/9563	0.000102551	0.00346963	0.00296858	SERPINB1/SERPINB5/MT3/CSTA/TIMP3/FN1/SERPINE2	7	BC	up
BP	GO:0018149	peptide cross-linking	6/75	23/9280	2.06e-08	2.79e-05	2.44e-05	THBS1/TGM2/CSTA/DCN/EVPL/FN1	6	BC	up
BP	GO:0030216	keratinocyte differentiation	6/75	50/9280	2.73e-06	0.000945933	0.000826953	SFN/CYP26B1/UGCG/CSTA/EVPL/CLIC4	6	BC	up
BP	GO:0007229	integrin-mediated signaling pathway	6/75	51/9280	3.07e-06	0.000945933	0.000826953	ITGA2/FN1/ITGAV/PTN/ITGB6/ITGB1	6	BC	up
BP	GO:0007160	cell-matrix adhesion	6/75	90/9280	8.28e-05	0.00864217	0.00755515	PLAU/THBS1/FN1/ITGAV/ITGB6/ITGB1	6	BC	up
BP	GO:0032535	regulation of cellular component size	6/75	137/9280	0.000810381	0.0394684	0.034504	MT3/FN1/CAPG/ARPC2/ARPC1B/SPTBN1	6	BC	up
BP	GO:0050878	regulation of body fluid levels	6/75	139/9280	0.00087426	0.0395457	0.0345716	SFN/CYP26B1/PLAU/THBS1/UGCG/F3	6	BC	up
BP	GO:0019221	cytokine-mediated signaling pathway	6/75	148/9280	0.00121124	0.0498075	0.0435427	UGCG/MT3/NFKBIA/IFI27/TXNDC17/ECM1	6	BC	up
MF	GO:0005539	glycosaminoglycan binding	6/86	92/9563	0.000170466	0.00494352	0.00422961	THBS1/CD44/DCN/FN1/CCDC80/PTN	6	BC	up
BP	GO:0010466	negative regulation of peptidase activity	5/75	33/9280	5.99e-06	0.00116186	0.00101572	SFN/THBS1/MT3/TIMP3/ECM1	5	BC	up
BP	GO:0051346	negative regulation of hydrolase activity	5/75	75/9280	0.000334805	0.0216348	0.0189135	SFN/THBS1/MT3/TIMP3/ECM1	5	BC	up
BP	GO:0052547	regulation of peptidase activity	5/75	100/9280	0.00124899	0.0498494	0.0435793	SFN/THBS1/MT3/TIMP3/ECM1	5	BC	up
CC	GO:0098636	protein complex involved in cell adhesion	5/90	26/10372	2.51e-06	0.000142305	0.000106237	PLAU/ITGA2/ITGAV/ITGB6/ITGB1	5	BC	up
CC	GO:0045111	intermediate filament cytoskeleton	5/90	95/10372	0.00137953	0.0216127	0.0161349	KRT27/VIM/KRT5/EVPL/KRT7	5	BC	up
MF	GO:0005178	integrin binding	5/86	41/9563	3.04e-05	0.00123377	0.0010556	THBS1/FN1/ITGAV/PTN/ITGB6	5	BC	up
BP	GO:0033627	cell adhesion mediated by integrin	4/75	28/9280	6.96e-05	0.00858132	0.00750196	PLAU/ITGA2/ITGAV/CYP1B1	4	BC	up
BP	GO:0022612	gland morphogenesis	4/75	49/9280	0.0006332	0.0358022	0.031299	SERPINB5/TGM2/IGFBP5/PTN	4	BC	up
CC	GO:0001533	cornified envelope	4/90	16/10372	8.91e-06	0.000314056	0.000234457	SERPINB5/DSG3/CSTA/EVPL	4	BC	up
CC	GO:0008305	integrin complex	4/90	18/10372	1.48e-05	0.000416848	0.000311197	ITGA2/ITGAV/ITGB6/ITGB1	4	BC	up
CC	GO:0030496	midbody	4/90	85/10372	0.00628915	0.0495992	0.0370282	GEM/GNL3/CAPG/CLIC4	4	BC	up
MF	GO:0001968	fibronectin binding	4/86	11/9563	1.92e-06	0.000389277	0.00033306	THBS1/IGFBP5/ITGAV/CCDC80	4	BC	up
MF	GO:0050840	extracellular matrix binding	4/86	19/9563	2.13e-05	0.00123377	0.0010556	THBS1/DCN/ITGAV/ECM1	4	BC	up
MF	GO:0002020	protease binding	4/86	57/9563	0.00167549	0.0257121	0.0219989	CSTA/FN1/ITGAV/ECM1	4	BC	up
MF	GO:0019838	growth factor binding	4/86	60/9563	0.00202657	0.0257121	0.0219989	THBS1/IGFBP2/IGFBP5/ITGAV	4	BC	up
BP	GO:0043277	apoptotic cell clearance	3/75	15/9280	0.000215155	0.0162203	0.0141801	THBS1/TGM2/ITGAV	3	BC	up
BP	GO:0061436	establishment of skin barrier	3/75	15/9280	0.000215155	0.0162203	0.0141801	SFN/CYP26B1/UGCG	3	BC	up
BP	GO:1905953	negative regulation of lipid localization	3/75	19/9280	0.000447677	0.0264129	0.0230907	THBS1/NFKBIA/ITGAV	3	BC	up
BP	GO:0001523	retinoid metabolic process	3/75	23/9280	0.000799416	0.0394684	0.034504	CYP26B1/RBP1/CYP1B1	3	BC	up
BP	GO:0016101	diterpenoid metabolic process	3/75	23/9280	0.000799416	0.0394684	0.034504	CYP26B1/RBP1/CYP1B1	3	BC	up
CC	GO:0005902	microvillus	3/90	28/10372	0.00176908	0.024944	0.0186219	CD44/ITGAV/CLIC4	3	BC	up
CC	GO:0005885	Arp2/3 protein complex	2/90	10/10372	0.00320254	0.0376299	0.0280925	ARPC2/ARPC1B	2	BC	up
CC	GO:0030669	clathrin-coated endocytic vesicle membrane	2/90	10/10372	0.00320254	0.0376299	0.0280925	HBEGF/AREG	2	BC	up
CC	GO:0045334	clathrin-coated endocytic vesicle	2/90	14/10372	0.00633182	0.0495992	0.0370282	HBEGF/AREG	2	BC	up
BP	GO:1901700	response to oxygen-containing compound	18/93	480/9280	1.01e-06	0.000316632	0.0002617	FOS/PCK1/EGR1/MT3/GLUL/AQP3/RHOB/CYP26B1/BCL10/PRNP/MDM2/THBS1/NQO1/NFKBIA/ADRB2/NR1D1/PDK3/ZFP36	18	TDCE	down
BP	GO:0009628	response to abiotic stimulus	17/93	382/9280	1.92e-07	0.000137262	0.000113449	FOS/PCK1/EGR1/SOD3/KIT/MT3/BHLHE40/AQP3/RHOB/YBX3/DNAJA2/BCL10/MDM2/NFKBIA/ADRB2/PDK3/EPAS1	17	TDCE	down
MF	GO:0003700	DNA-binding transcription factor activity	16/101	472/9563	3.16e-05	0.0085066	0.00738981	NR4A1/FOS/HLF/EGR1/DBP/ATF3/MEIS1/PAX6/ZNF750/BHLHE40/NR4A2/ATF4/ELF3/NR1D1/FOSB/EPAS1	16	TDCE	down
BP	GO:1901701	cellular response to oxygen-containing compound	14/93	368/9280	1.59e-05	0.00176787	0.00146116	FOS/PCK1/MT3/RHOB/CYP26B1/BCL10/PRNP/MDM2/NQO1/NFKBIA/ADRB2/NR1D1/PDK3/ZFP36	14	TDCE	down
BP	GO:0071495	cellular response to endogenous stimulus	13/93	478/9280	0.000904195	0.0240694	0.0198936	FOS/PCK1/EGR1/FGFR3/KIT/MT3/PRNP/MDM2/UGCG/THBS1/HSPA5/ADRB2/ZFP36	13	TDCE	down
BP	GO:0071345	cellular response to cytokine stimulus	12/93	283/9280	2.35e-05	0.002118	0.00175055	EGR1/DUSP1/KIT/MT3/YBX3/TFRC/UGCG/HSPA5/NFKBIA/NR1D1/ZFP36/DAPK1	12	TDCE	down
BP	GO:0044092	negative regulation of molecular function	12/93	309/9280	5.57e-05	0.00402365	0.00332559	DUSP1/MT3/BHLHE40/GADD45B/SFN/PRNP/THBS1/NQO1/NFKBIA/ADRB2/ZFP36/ANGPTL4	12	TDCE	down
BP	GO:0034097	response to cytokine	12/93	310/9280	5.75e-05	0.00402365	0.00332559	EGR1/DUSP1/KIT/MT3/YBX3/TFRC/UGCG/HSPA5/NFKBIA/NR1D1/ZFP36/DAPK1	12	TDCE	down
BP	GO:0043085	positive regulation of catalytic activity	12/93	349/9280	0.000177294	0.00817284	0.00675494	FGFR3/TNFSF10/KIT/MT3/CLDN4/ASPH/BCL10/PRNP/THBS1/ADRB2/XDH/LMO4	12	TDCE	down
BP	GO:0043069	negative regulation of programmed cell death	12/93	350/9280	0.000182088	0.00819395	0.00677239	KIT/MT3/SOCS3/SFN/YBX3/TFRC/BCL10/PRNP/MDM2/THBS1/HSPA5/ANGPTL4	12	TDCE	down
BP	GO:0051093	negative regulation of developmental process	12/93	358/9280	0.000224598	0.00922644	0.00762575	MEIS1/KIT/MT3/ZNF750/YBX3/TFRC/THBS1/NFKBIA/ADRB2/NR1D1/ZFP36/XDH	12	TDCE	down
BP	GO:0001932	regulation of protein phosphorylation	12/93	371/9280	0.000311744	0.0114101	0.00943056	FGFR3/DUSP1/KIT/MT3/TOM1L1/GADD45B/SFN/TFRC/PRNP/THBS1/ADRB2/XDH	12	TDCE	down
BP	GO:0060429	epithelium development	12/93	446/9280	0.00158072	0.0331952	0.0274362	TXNIP/EVPL/RHOB/KRT4/SFN/CYP26B1/BCL10/UGCG/ELF3/ZFP36/XDH/LMO4	12	TDCE	down
BP	GO:0048871	multicellular organismal homeostasis	11/93	201/9280	4.84e-06	0.00114265	0.00094441	EGR1/IL20RB/AQP3/SFN/CYP26B1/CLDN4/TFRC/CLDN1/UGCG/ADRB2/NR1D1	11	TDCE	down
BP	GO:0051338	regulation of transferase activity	11/93	279/9280	0.000101718	0.00558367	0.00461496	FGFR3/DUSP1/KIT/MT3/GADD45B/SFN/PRNP/THBS1/ADRB2/ZFP36/LMO4	11	TDCE	down
BP	GO:0001775	cell activation	11/93	402/9280	0.00218864	0.0401605	0.0331931	PCK1/EGR1/KIT/IL20RB/CYP26B1/TFRC/BCL10/PRNP/THBS1/NR1D1/LMO4	11	TDCE	down
MF	GO:0000977	RNA polymerase II transcription regulatory region sequence-specific DNA binding	11/101	295/9563	0.000268753	0.0351565	0.030541	FOS/EGR1/DBP/MEIS1/ZNF750/BHLHE40/YBX3/TOP1/ELF3/NR1D1/FOSB	11	TDCE	down
MF	GO:0001067	transcription regulatory region nucleic acid binding	11/101	353/9563	0.00120396	0.0462663	0.0401922	FOS/EGR1/DBP/MEIS1/ZNF750/BHLHE40/YBX3/TOP1/ELF3/NR1D1/FOSB	11	TDCE	down
BP	GO:0043549	regulation of kinase activity	10/93	232/9280	0.000103162	0.00558367	0.00461496	FGFR3/DUSP1/KIT/MT3/GADD45B/SFN/PRNP/THBS1/ADRB2/LMO4	10	TDCE	down
BP	GO:0051336	regulation of hydrolase activity	10/93	289/9280	0.000604667	0.017337	0.0143292	FGFR3/TNFSF10/MT3/SFN/CLDN4/ASPH/BCL10/THBS1/XDH/ANGPTL4	10	TDCE	down
BP	GO:0009991	response to extracellular stimulus	9/93	124/9280	3.8e-06	0.00102513	0.00084728	FOS/PCK1/MT3/GLUL/AQP3/BCL10/HSPA5/ADRB2/ZFP36	9	TDCE	down
BP	GO:0050865	regulation of cell activation	9/93	225/9280	0.000405166	0.0134344	0.0111037	PCK1/IL20RB/CYP26B1/TFRC/BCL10/PRNP/THBS1/NR1D1/LMO4	9	TDCE	down
BP	GO:0071363	cellular response to growth factor stimulus	9/93	258/9280	0.0010824	0.0269176	0.0222477	FOS/EGR1/FGFR3/MT3/CD63/THBS1/HSPA5/ZFP36/XDH	9	TDCE	down
BP	GO:0070848	response to growth factor	9/93	270/9280	0.00148666	0.0320712	0.0265072	FOS/EGR1/FGFR3/MT3/CD63/THBS1/HSPA5/ZFP36/XDH	9	TDCE	down
BP	GO:0052547	regulation of peptidase activity	8/93	100/9280	6.57e-06	0.00132455	0.00109475	TNFSF10/MT3/SFN/CLDN4/ASPH/BCL10/THBS1/XDH	8	TDCE	down
BP	GO:0043588	skin development	8/93	109/9280	1.25e-05	0.00156939	0.00129712	TXNIP/EVPL/SFN/CYP26B1/CLDN4/CLDN1/UGCG/ZFP36	8	TDCE	down
BP	GO:0050878	regulation of body fluid levels	8/93	139/9280	7.22e-05	0.00487617	0.00403021	AQP3/SFN/CYP26B1/CLDN4/CLDN1/UGCG/THBS1/XDH	8	TDCE	down
BP	GO:0042110	T cell activation	8/93	188/9280	0.000572655	0.017337	0.0143292	PCK1/EGR1/KIT/IL20RB/CYP26B1/TFRC/BCL10/PRNP	8	TDCE	down
BP	GO:0010942	positive regulation of cell death	8/93	212/9280	0.00125297	0.0281919	0.0233009	TNFSF10/MT3/RHOB/GADD45B/BCL10/SLC6A6/PRNP/THBS1	8	TDCE	down
BP	GO:0097190	apoptotic signaling pathway	8/93	240/9280	0.00273452	0.0461451	0.0381394	FGFR3/UACA/TNFSF10/SFN/YBX3/BCL10/MDM2/THBS1	8	TDCE	down
BP	GO:0009410	response to xenobiotic stimulus	7/93	72/9280	7.01e-06	0.00132455	0.00109475	CYP26A1/FOS/CYP26B1/TFRC/TOP1/PRNP/THBS1	7	TDCE	down
BP	GO:0001666	response to hypoxia	7/93	76/9280	1.01e-05	0.00146373	0.00120979	EGR1/SOD3/MT3/AQP3/MDM2/PDK3/EPAS1	7	TDCE	down
BP	GO:0008544	epidermis development	7/93	115/9280	0.00014703	0.00699676	0.0057829	TXNIP/EVPL/ZNF750/SFN/CYP26B1/UGCG/ZFP36	7	TDCE	down
BP	GO:0050678	regulation of epithelial cell proliferation	7/93	153/9280	0.000835832	0.0226938	0.0187567	KRT4/SFN/CLDN1/THBS1/NR1D1/ZFP36/XDH	7	TDCE	down
BP	GO:0010035	response to inorganic substance	7/93	163/9280	0.0012113	0.0279538	0.0231041	FOS/MT3/RHOB/PRNP/THBS1/NQO1/FOSB	7	TDCE	down
BP	GO:0043410	positive regulation of MAPK cascade	7/93	176/9280	0.00188441	0.0370993	0.030663	FGFR3/KIT/MT3/GADD45B/THBS1/ADRB2/XDH	7	TDCE	down
BP	GO:0050673	epithelial cell proliferation	7/93	185/9280	0.0024994	0.0429443	0.0354939	KRT4/SFN/CLDN1/THBS1/NR1D1/ZFP36/XDH	7	TDCE	down
BP	GO:0050891	multicellular organismal water homeostasis	6/93	28/9280	2.72e-07	0.000137262	0.000113449	AQP3/SFN/CYP26B1/CLDN4/CLDN1/UGCG	6	TDCE	down
BP	GO:0030104	water homeostasis	6/93	29/9280	3.4e-07	0.000137262	0.000113449	AQP3/SFN/CYP26B1/CLDN4/CLDN1/UGCG	6	TDCE	down
BP	GO:0030216	keratinocyte differentiation	6/93	50/9280	9.59e-06	0.00146373	0.00120979	TXNIP/EVPL/SFN/CYP26B1/UGCG/ZFP36	6	TDCE	down
BP	GO:0071216	cellular response to biotic stimulus	6/93	74/9280	9.22e-05	0.00544686	0.00450189	TXNIP/BCL10/HSPA5/NFKBIA/NR1D1/ZFP36	6	TDCE	down
BP	GO:0007623	circadian rhythm	6/93	87/9280	0.000226497	0.00922644	0.00762575	EGR1/DBP/BHLHE40/TOP1/NR1D1/PER3	6	TDCE	down
BP	GO:0071496	cellular response to external stimulus	6/93	109/9280	0.000761586	0.0211676	0.0174953	FOS/PCK1/GLUL/AQP3/BCL10/HSPA5	6	TDCE	down
BP	GO:1901652	response to peptide	6/93	127/9280	0.00168375	0.0340428	0.0281367	PCK1/EGR1/PRNP/MDM2/NFKBIA/ADRB2	6	TDCE	down
BP	GO:0071214	cellular response to abiotic stimulus	6/93	132/9280	0.00204915	0.038729	0.0320099	PCK1/EGR1/RHOB/YBX3/BCL10/MDM2	6	TDCE	down
BP	GO:0104004	cellular response to environmental stimulus	6/93	132/9280	0.00204915	0.038729	0.0320099	PCK1/EGR1/RHOB/YBX3/BCL10/MDM2	6	TDCE	down
CC	GO:0045178	basal part of cell	6/101	87/10372	0.000196119	0.0341246	0.0301403	AQP3/CLDN7/ITGA2/TFRC/CLDN1/SLC6A6	6	TDCE	down
BP	GO:0061436	establishment of skin barrier	5/93	15/9280	2.52e-07	0.000137262	0.000113449	SFN/CYP26B1/CLDN4/CLDN1/UGCG	5	TDCE	down
BP	GO:0033561	regulation of water loss via skin	5/93	16/9280	3.63e-07	0.000137262	0.000113449	SFN/CYP26B1/CLDN4/CLDN1/UGCG	5	TDCE	down
BP	GO:0032922	circadian regulation of gene expression	5/93	33/9280	1.72e-05	0.00179688	0.00148514	EGR1/BHLHE40/TOP1/NR1D1/PER3	5	TDCE	down
BP	GO:0035914	skeletal muscle cell differentiation	5/93	34/9280	2.01e-05	0.0018957	0.00156682	FOS/HLF/EGR1/BTG2/CYP26B1	5	TDCE	down
BP	GO:0009749	response to glucose	5/93	49/9280	0.000122117	0.00641113	0.00529887	PCK1/EGR1/GLUL/THBS1/NR1D1	5	TDCE	down
BP	GO:0010952	positive regulation of peptidase activity	5/93	54/9280	0.000194698	0.00855767	0.007073	TNFSF10/CLDN4/ASPH/BCL10/XDH	5	TDCE	down
BP	GO:0072593	reactive oxygen species metabolic process	5/93	90/9280	0.00203905	0.038729	0.0320099	MT3/THBS1/NQO1/PDK3/XDH	5	TDCE	down
BP	GO:0031668	cellular response to extracellular stimulus	5/93	91/9280	0.00214077	0.0399259	0.0329992	FOS/PCK1/GLUL/AQP3/HSPA5	5	TDCE	down
BP	GO:0031648	protein destabilization	4/93	24/9280	8.61e-05	0.00525215	0.00434096	MYLIP/PRNP/MDM2/NR1D1	4	TDCE	down
BP	GO:0038066	p38MAPK cascade	4/93	24/9280	8.61e-05	0.00525215	0.00434096	DUSP1/GADD45B/ZFP36/XDH	4	TDCE	down
BP	GO:0071456	cellular response to hypoxia	4/93	33/9280	0.000309642	0.0114101	0.00943056	EGR1/AQP3/MDM2/PDK3	4	TDCE	down
BP	GO:0071466	cellular response to xenobiotic stimulus	4/93	39/9280	0.000594485	0.017337	0.0143292	CYP26A1/CYP26B1/TFRC/PRNP	4	TDCE	down
BP	GO:2000377	regulation of reactive oxygen species metabolic process	4/93	47/9280	0.00121281	0.0279538	0.0231041	MT3/THBS1/PDK3/XDH	4	TDCE	down
BP	GO:0009612	response to mechanical stimulus	4/93	50/9280	0.00153055	0.0325027	0.0268638	FOS/KIT/BCL10/NFKBIA	4	TDCE	down
BP	GO:0071222	cellular response to lipopolysaccharide	4/93	56/9280	0.00233199	0.0419759	0.0346935	BCL10/NFKBIA/NR1D1/ZFP36	4	TDCE	down
BP	GO:0034614	cellular response to reactive oxygen species	4/93	58/9280	0.00265311	0.0451746	0.0373373	FOS/MT3/RHOB/NQO1	4	TDCE	down
BP	GO:0048512	circadian behavior	3/93	16/9280	0.000496441	0.0161771	0.0133706	EGR1/NR1D1/PER3	3	TDCE	down
BP	GO:0010939	regulation of necrotic cell death	3/93	17/9280	0.000598459	0.017337	0.0143292	MT3/YBX3/SLC6A6	3	TDCE	down
BP	GO:0032703	negative regulation of interleukin-2 production	3/93	17/9280	0.000598459	0.017337	0.0143292	IL20RB/PRNP/ZFP36	3	TDCE	down
BP	GO:1900744	regulation of p38MAPK cascade	3/93	19/9280	0.000840512	0.0226938	0.0187567	DUSP1/GADD45B/XDH	3	TDCE	down
BP	GO:0006775	fat-soluble vitamin metabolic process	3/93	20/9280	0.00098169	0.0254164	0.0210069	CYP26A1/CYP26B1/NQO1	3	TDCE	down
BP	GO:2001238	positive regulation of extrinsic apoptotic signaling pathway	3/93	20/9280	0.00098169	0.0254164	0.0210069	TNFSF10/BCL10/THBS1	3	TDCE	down
BP	GO:0090303	positive regulation of wound healing	3/93	21/9280	0.00113703	0.0275903	0.0228037	CLDN4/CLDN1/THBS1	3	TDCE	down
BP	GO:0006687	glycosphingolipid metabolic process	3/93	24/9280	0.00169313	0.0340428	0.0281367	KIT/B4GALT5/UGCG	3	TDCE	down
BP	GO:0043154	negative regulation of cysteine-type endopeptidase activity involved in apoptotic process	3/93	24/9280	0.00169313	0.0340428	0.0281367	MT3/SFN/THBS1	3	TDCE	down
BP	GO:0070265	necrotic cell death	3/93	27/9280	0.0023943	0.0426908	0.0352844	MT3/YBX3/SLC6A6	3	TDCE	down
BP	GO:0051149	positive regulation of muscle cell differentiation	3/93	29/9280	0.0029481	0.0480338	0.0397004	KIT/CYP26B1/MDM2	3	TDCE	down
BP	GO:0051726	regulation of cell cycle	22/146	456/9280	2.34e-06	0.000441902	0.000375042	CDC20/KIF20B/AURKB/NDC80/CCNG2/KMT2E/NEK2/BUB1/NOP53/CDC25B/BUB1B/MKI67/RHOB/GADD45B/CENPF/ID2/SFN/CRY1/RB1/PPP1R10/GADD45G/USP22	22	TAC	down
BP	GO:0051248	negative regulation of protein metabolic process	20/146	344/9280	3.96e-07	0.000117278	9.95e-05	CDC20/TSPO/BTG2/TOB1/NOP53/DUSP1/PBK/GADD45B/SFN/MT3/NQO1/CRY1/RB1/ZFP36/DUSP6/CLU/THBS1/ERRFI1/GRB7/XDH	20	TAC	down
BP	GO:0010558	negative regulation of macromolecule biosynthetic process	20/146	471/9280	4.53e-05	0.00361336	0.00306666	TXNIP/AURKB/EGR1/BTG2/HEXIM1/TOB1/NOP53/DEPDC1/CENPF/ID2/MT3/CRY1/YBX3/RB1/ZFP36/PER3/DKK3/PDCD4/GRB7/ELF3	20	TAC	down
BP	GO:0031327	negative regulation of cellular biosynthetic process	20/146	493/9280	8.55e-05	0.00450679	0.00382491	TXNIP/AURKB/EGR1/BTG2/HEXIM1/TOB1/NOP53/DEPDC1/CENPF/ID2/MT3/CRY1/YBX3/RB1/ZFP36/PER3/DKK3/PDCD4/GRB7/ELF3	20	TAC	down
BP	GO:1903047	mitotic cell cycle process	19/146	307/9280	3.05e-07	0.000105315	8.94e-05	STMN1/CDC20/KIF20B/AURKB/TACC1/NDC80/CKAP2/KMT2E/NEK2/BUB1/NOP53/BUB1B/KIF4A/MKI67/RHOB/CENPF/ID2/RB1/PPP1R10	19	TAC	down
BP	GO:1901700	response to oxygen-containing compound	18/146	480/9280	0.000515696	0.0121599	0.0103201	FOS/HMGB2/EGR1/PCK1/RHOB/CYP26B1/MT3/NQO1/CRY1/RB1/SLC38A2/ZFP36/THBS1/GSK3B/NFKBIA/GLUL/ADRB2/AQP3	18	TAC	down
BP	GO:0051301	cell division	17/146	221/9280	6.04e-08	6.32e-05	5.37e-05	TXNIP/ASPM/STMN1/SPC25/CDC20/KIF20B/AURKB/SGO2/NDC80/TOP2A/CKAP2/CDC25B/KIF4A/RHOB/CCNB2/SFN/RB1	17	TAC	down
BP	GO:0044092	negative regulation of molecular function	17/146	309/9280	6.65e-06	0.000984978	0.000835951	STMN1/CDC20/AURKB/NEK2/DUSP1/GADD45B/ID2/SFN/MT3/NQO1/RB1/ZFP36/THBS1/ERRFI1/GSK3B/NFKBIA/ADRB2	17	TAC	down
BP	GO:0045892	negative regulation of DNA-templated transcription	17/146	377/9280	8.5e-05	0.00450679	0.00382491	TXNIP/AURKB/EGR1/HEXIM1/NOP53/DEPDC1/CENPF/ID2/MT3/CRY1/YBX3/RB1/ZFP36/PER3/DKK3/PDCD4/ELF3	17	TAC	down
BP	GO:1903507	negative regulation of nucleic acid-templated transcription	17/146	377/9280	8.5e-05	0.00450679	0.00382491	TXNIP/AURKB/EGR1/HEXIM1/NOP53/DEPDC1/CENPF/ID2/MT3/CRY1/YBX3/RB1/ZFP36/PER3/DKK3/PDCD4/ELF3	17	TAC	down
BP	GO:1902679	negative regulation of RNA biosynthetic process	17/146	378/9280	8.78e-05	0.00450679	0.00382491	TXNIP/AURKB/EGR1/HEXIM1/NOP53/DEPDC1/CENPF/ID2/MT3/CRY1/YBX3/RB1/ZFP36/PER3/DKK3/PDCD4/ELF3	17	TAC	down
BP	GO:0051129	negative regulation of cellular component organization	15/146	274/9280	2.54e-05	0.00239799	0.00203517	STMN1/TSPO/AURKB/NDC80/TOP2A/CKAP2/BUB1/NOP53/BUB1B/MT3/SCIN/CLU/GSN/GSK3B/MYLIP	15	TAC	down
BP	GO:0009628	response to abiotic stimulus	15/146	382/9280	0.000969302	0.0197187	0.0167352	FOS/AURKB/EGR1/PCK1/EPAS1/NOP53/PBK/RHOB/MT3/CRY1/YBX3/GSN/NFKBIA/ADRB2/AQP3	15	TAC	down
BP	GO:1902532	negative regulation of intracellular signal transduction	14/146	217/9280	7.59e-06	0.00104955	0.000890754	STMN1/NOP53/DUSP1/PBK/EPHA2/YBX3/DUSP6/CLU/ARHGAP12/THBS1/FBXW11/GSK3B/XDH/PPP1R10	14	TAC	down
BP	GO:0043085	positive regulation of catalytic activity	14/146	349/9280	0.00117073	0.0235852	0.0200167	CDC20/AURKB/RABGAP1/NEK2/MT3/EPHA2/CLDN4/CLU/THBS1/GSN/GSK3B/ADRB2/XDH/ASPH	14	TAC	down
BP	GO:0007059	chromosome segregation	13/146	178/9280	4.23e-06	0.000674876	0.000572767	SPC25/CDC20/AURKB/SGO2/NDC80/TOP2A/NEK2/BUB1/BUB1B/KIF4A/MKI67/CENPF/RB1	13	TAC	down
BP	GO:0000280	nuclear division	13/146	204/9280	1.86e-05	0.00203018	0.00172302	CDC20/KIF20B/AURKB/SGO2/NDC80/TOP2A/NEK2/BUB1/BUB1B/KIF4A/MKI67/CYP26B1/RB1	13	TAC	down
BP	GO:0051338	regulation of transferase activity	13/146	279/9280	0.000441454	0.0107014	0.00908231	CDC20/AURKB/NEK2/DUSP1/GADD45B/SFN/MT3/RB1/ZFP36/CLU/THBS1/ERRFI1/ADRB2	13	TAC	down
BP	GO:0010942	positive regulation of cell death	12/146	212/9280	0.000123911	0.00534008	0.00453213	TOP2A/RHOB/GADD45B/MT3/STK17A/SCIN/DUSP6/CLU/THBS1/GSN/GSK3B/G0S2	12	TAC	down
BP	GO:0051276	chromosome organization	12/146	237/9280	0.000349123	0.00928758	0.00788237	CDC20/HMGB2/AURKB/SGO2/NDC80/TOP2A/NEK2/BUB1/BUB1B/KIF4A/RB1/PPP1R10	12	TAC	down
BP	GO:0051336	regulation of hydrolase activity	12/146	289/9280	0.00197788	0.0356879	0.0302883	STMN1/BIRC5/RABGAP1/SFN/MT3/EPHA2/CLDN4/THBS1/GSN/GSK3B/XDH/ASPH	12	TAC	down
BP	GO:0031329	regulation of cellular catabolic process	12/146	298/9280	0.00255107	0.0430363	0.0365249	TSPO/BTG2/TOB1/NOP53/PBK/MT3/ZFP36/CLU/GSK3B/ADRB2/ZFP36L1/MYLIP	12	TAC	down
BP	GO:0043588	skin development	11/146	109/9280	1.03e-06	0.000236882	0.000201041	TXNIP/STMN1/EVPL/CYP26B1/SFN/KRT27/CLDN1/ZFP36/CLDN4/ERRFI1/UGCG	11	TAC	down
BP	GO:0048871	multicellular organismal homeostasis	11/146	201/9280	0.00031967	0.00928758	0.00788237	STMN1/EGR1/CYP26B1/SFN/RB1/CLDN1/CLDN4/UGCG/ADRB2/AQP3/G0S2	11	TAC	down
BP	GO:0098813	nuclear chromosome segregation	10/146	145/9280	9.2e-05	0.00450679	0.00382491	CDC20/AURKB/SGO2/NDC80/NEK2/BUB1/BUB1B/KIF4A/CENPF/RB1	10	TAC	down
BP	GO:0031400	negative regulation of protein modification process	10/146	174/9280	0.000407918	0.0104498	0.00886871	CDC20/TSPO/DUSP1/PBK/GADD45B/CRY1/RB1/DUSP6/ERRFI1/XDH	10	TAC	down
CC	GO:0000793	condensed chromosome	10/149	131/10372	1.81e-05	0.00372485	0.00344505	SPC25/AURKB/SGO2/NDC80/TOP2A/NEK2/BUB1/BUB1B/MKI67/CENPF	10	TAC	down
BP	GO:0000819	sister chromatid segregation	9/146	108/9280	4.81e-05	0.00369354	0.00313471	CDC20/AURKB/SGO2/NDC80/NEK2/BUB1/BUB1B/KIF4A/RB1	9	TAC	down
BP	GO:0050878	regulation of body fluid levels	9/146	139/9280	0.000333386	0.00928758	0.00788237	STMN1/CYP26B1/SFN/CLDN1/CLDN4/THBS1/UGCG/AQP3/XDH	9	TAC	down
BP	GO:1903706	regulation of hemopoiesis	9/146	152/9280	0.000641924	0.014021	0.0118996	FOS/PCK1/NFKBIZ/MAFB/CYP26B1/SCIN/RB1/ZFP36/NFKBIA	9	TAC	down
BP	GO:0022411	cellular component disassembly	9/146	173/9280	0.00160472	0.0299982	0.0254594	STMN1/TSPO/TOP2A/CKAP2/SCIN/GSN/GSK3B/ADRB2/RETREG1	9	TAC	down
BP	GO:0051783	regulation of nuclear division	8/146	56/9280	2.32e-06	0.000441902	0.000375042	CDC20/KIF20B/AURKB/NDC80/BUB1/BUB1B/MKI67/RB1	8	TAC	down
BP	GO:0008544	epidermis development	8/146	115/9280	0.00044353	0.0107014	0.00908231	TXNIP/EVPL/CYP26B1/SFN/KRT27/ZFP36/ERRFI1/UGCG	8	TAC	down
BP	GO:0010563	negative regulation of phosphorus metabolic process	8/146	147/9280	0.00219294	0.0384755	0.0326541	TSPO/DUSP1/PBK/GADD45B/RB1/DUSP6/ERRFI1/XDH	8	TAC	down
BP	GO:0045936	negative regulation of phosphate metabolic process	8/146	147/9280	0.00219294	0.0384755	0.0326541	TSPO/DUSP1/PBK/GADD45B/RB1/DUSP6/ERRFI1/XDH	8	TAC	down
BP	GO:0030104	water homeostasis	7/146	29/9280	2.41e-07	0.000100139	8.5e-05	STMN1/CYP26B1/SFN/CLDN1/CLDN4/UGCG/AQP3	7	TAC	down
BP	GO:0007088	regulation of mitotic nuclear division	7/146	43/9280	4.14e-06	0.000674876	0.000572767	KIF20B/AURKB/NDC80/BUB1/BUB1B/MKI67/RB1	7	TAC	down
BP	GO:0030216	keratinocyte differentiation	7/146	50/9280	1.17e-05	0.00143006	0.00121369	TXNIP/EVPL/CYP26B1/SFN/ZFP36/ERRFI1/UGCG	7	TAC	down
BP	GO:0007052	mitotic spindle organization	7/146	55/9280	2.23e-05	0.00220254	0.0018693	STMN1/CDC20/AURKB/TACC1/NDC80/NEK2/KIF4A	7	TAC	down
BP	GO:0045862	positive regulation of proteolysis	7/146	118/9280	0.0025444	0.0430363	0.0365249	NOP53/CLDN4/CLU/GSN/GSK3B/XDH/ASPH	7	TAC	down
CC	GO:0030496	midbody	7/149	85/10372	0.000212204	0.00675326	0.00624599	KIF20B/AURKB/NEK2/KIF4A/CENPF/PLK1/ARF6	7	TAC	down
BP	GO:0061436	establishment of skin barrier	6/146	15/9280	6.09e-08	6.32e-05	5.37e-05	STMN1/CYP26B1/SFN/CLDN1/CLDN4/UGCG	6	TAC	down
BP	GO:0035914	skeletal muscle cell differentiation	6/146	34/9280	1.28e-05	0.00147504	0.00125187	HLF/FOS/EGR1/BTG2/CYP26B1/RB1	6	TAC	down
BP	GO:0051983	regulation of chromosome segregation	6/146	50/9280	0.000122924	0.00534008	0.00453213	AURKB/NDC80/BUB1/BUB1B/MKI67/RB1	6	TAC	down
BP	GO:0007623	circadian rhythm	6/146	87/9280	0.00242755	0.0419763	0.0356253	DBP/EGR1/TOP2A/CRY1/PER3/FBXW11	6	TAC	down
BP	GO:0072593	reactive oxygen species metabolic process	6/146	90/9280	0.00288032	0.0474339	0.0402571	TSPO/MT3/NQO1/STK17A/THBS1/XDH	6	TAC	down
BP	GO:0030071	regulation of mitotic metaphase/anaphase transition	5/146	29/9280	7.88e-05	0.00450679	0.00382491	AURKB/NDC80/BUB1/BUB1B/RB1	5	TAC	down
BP	GO:0007091	metaphase/anaphase transition of mitotic cell cycle	5/146	30/9280	9.34e-05	0.00450679	0.00382491	AURKB/NDC80/BUB1/BUB1B/RB1	5	TAC	down
BP	GO:2000377	regulation of reactive oxygen species metabolic process	5/146	47/9280	0.000811109	0.0170005	0.0144283	TSPO/MT3/STK17A/THBS1/XDH	5	TAC	down
CC	GO:0016528	sarcoplasm	5/149	32/10372	8.42e-05	0.00454423	0.00420289	GSN/SYNE2/XDH/ASPH/SERTAD1	5	TAC	down
BP	GO:0099024	plasma membrane invagination	4/146	22/9280	0.000344949	0.00928758	0.00788237	AURKB/ARHGAP12/THBS1/GSN	4	TAC	down
BP	GO:0038066	p38MAPK cascade	4/146	24/9280	0.000488984	0.0116626	0.00989801	DUSP1/GADD45B/ZFP36/XDH	4	TAC	down
BP	GO:0000289	nuclear-transcribed mRNA poly(A) tail shortening	3/146	10/9280	0.000422168	0.0105456	0.00895005	BTG2/TOB1/ZFP36	3	TAC	down
BP	GO:0006911	phagocytosis, engulfment	3/146	18/9280	0.00261755	0.0438017	0.0371745	ARHGAP12/THBS1/GSN	3	TAC	down
BP	GO:1900744	regulation of p38MAPK cascade	3/146	19/9280	0.00307279	0.0498127	0.0422761	DUSP1/GADD45B/XDH	3	TAC	down
BP	GO:1905953	negative regulation of lipid localization	3/146	19/9280	0.00307279	0.0498127	0.0422761	CRY1/THBS1/NFKBIA	3	TAC	down
MF	GO:0003700	DNA-binding transcription factor activity	22/149	472/9563	3.58e-06	0.00111823	0.00100354	FOS/ATF3/EPAS1/NR4A1/PAX6/FOSB/NR4A2/DBP/MAFB/TP63/ELF3/HLF/MEIS1/DDIT3/ATF4/FOSL1/EHF/ETV3/TGIF1/EGR1/NR1D1/MYC	22	LSC	down
BP	GO:0031327	negative regulation of cellular biosynthetic process	19/143	493/9280	0.000192496	0.0336869	0.0304863	TXNIP/BTG2/TP63/ID2/ELF3/FAM3C/TOB1/PDCD4/DDIT3/CCND1/MT3/YBX3/EZR/LYAR/GRB7/ZFP36/EGR1/HEXIM1/PER3	19	LSC	down
CC	GO:0005730	nucleolus	19/159	450/10372	5.72e-05	0.00386749	0.00366995	RGS2/NCL/TOP1/GNL3/EZR/GJB4/NOP56/SNU13/WDR43/PA2G4/LYAR/RCL1/RRP9/NOP16/NOP58/GTPBP4/PNO1/TAF1D/MYC	19	LSC	down
BP	GO:0010558	negative regulation of macromolecule biosynthetic process	18/143	471/9280	0.000318291	0.0437651	0.0396069	TXNIP/BTG2/TP63/ID2/ELF3/TOB1/PDCD4/DDIT3/CCND1/MT3/YBX3/EZR/LYAR/GRB7/ZFP36/EGR1/HEXIM1/PER3	18	LSC	down
BP	GO:0051248	negative regulation of protein metabolic process	15/143	344/9280	0.000259509	0.0384273	0.0347763	DUSP1/BTG2/TIMP3/GADD45B/TOB1/NTRK2/RGS2/MT3/SFN/PLAT/DUSP6/GRB7/TIMP1/PLAUR/ZFP36	15	LSC	down
BP	GO:0051093	negative regulation of developmental process	15/143	358/9280	0.000397406	0.0450004	0.0407249	DCN/MAFB/TP63/TOB1/ADRB2/MEIS1/DDIT3/CRIM1/CCND1/MT3/YBX3/NFKBIA/ZFP36/PLK2/NR1D1	15	LSC	down
BP	GO:0006954	inflammatory response	13/143	284/9280	0.000427803	0.0457512	0.0414044	ELF3/IL20RB/NFKBIA/TNFRSF1A/MAP2K3/IL4R/CXCL8/CXCL1/TIMP1/CXCL6/ZFP36/NFKBIZ/NR1D1	13	LSC	down
BP	GO:0010942	positive regulation of cell death	12/143	212/9280	0.000101533	0.0290481	0.0262883	TNFSF10/TIMP3/TP63/GADD45B/GSN/DDIT3/MT3/SOD2/NET1/DUSP6/SLC6A6/G0S2	12	LSC	down
BP	GO:1902532	negative regulation of intracellular signal transduction	12/143	217/9280	0.000126703	0.0290481	0.0262883	DUSP1/TIMP3/DDIT3/RGS2/YBX3/SOD2/DUSP6/EZR/EPHA2/MAP2K3/PLAUR/NR1D1	12	LSC	down
MF	GO:0004857	enzyme inhibitor activity	11/149	189/9563	0.000173091	0.0270022	0.0242327	TXNIP/TIMP3/RGS2/CRIM1/MT3/SERPINB1/ANXA1/TIMP1/PI3/CST6/HEXIM1	11	LSC	down
BP	GO:0052547	regulation of peptidase activity	9/143	100/9280	2.2e-05	0.0261727	0.023686	TNFSF10/PERP/TIMP3/TP63/GSN/MT3/SFN/TIMP1/PLAUR	9	LSC	down
BP	GO:0042254	ribosome biogenesis	9/143	135/9280	0.000229538	0.0368218	0.0333233	GLUL/NOP56/SNU13/WDR43/LYAR/RCL1/RRP9/NOP58/GTPBP4	9	LSC	down
BP	GO:0045444	fat cell differentiation	8/143	88/9280	5.94e-05	0.0290481	0.0262883	MAFB/ADRB2/DDIT3/RGS2/CCND1/ADIRF/ZFP36/NR1D1	8	LSC	down
CC	GO:0005925	focal adhesion	8/159	81/10372	3.19e-05	0.00386749	0.00366995	GSN/SYNE2/ITGA2/TNS4/EZR/EPHA2/GRB7/FAM107A	8	LSC	down
CC	GO:0030055	cell-substrate junction	8/159	86/10372	4.93e-05	0.00386749	0.00366995	GSN/SYNE2/ITGA2/TNS4/EZR/EPHA2/GRB7/FAM107A	8	LSC	down
BP	GO:0071216	cellular response to biotic stimulus	7/143	74/9280	0.000135399	0.0290481	0.0262883	TXNIP/DDIT3/NFKBIA/CXCL8/CXCL6/ZFP36/NR1D1	7	LSC	down
BP	GO:0030216	keratinocyte differentiation	6/143	50/9280	0.000109619	0.0290481	0.0262883	TXNIP/DSP/TP63/SFN/UGCG/ZFP36	6	LSC	down
BP	GO:0038066	p38MAPK cascade	5/143	24/9280	2.72e-05	0.0261727	0.023686	DUSP1/GADD45B/EZR/MAP2K3/ZFP36	5	LSC	down
BP	GO:0010466	negative regulation of peptidase activity	5/143	33/9280	0.000135809	0.0290481	0.0262883	TIMP3/MT3/SFN/TIMP1/PLAUR	5	LSC	down
BP	GO:0000289	nuclear-transcribed mRNA poly(A) tail shortening	3/143	10/9280	0.00039718	0.0450004	0.0407249	BTG2/TOB1/ZFP36	3	LSC	down
BP	GO:0070141	response to UV-A	3/143	10/9280	0.00039718	0.0450004	0.0407249	CCND1/MMP1/TIMP1	3	LSC	down
CC	GO:0005732	sno(s)RNA-containing ribonucleoprotein complex	3/159	13/10372	0.000903086	0.0458316	0.0434907	NOP56/RRP9/NOP58	3	LSC	down
MF	GO:0003700	DNA-binding transcription factor activity	17/120	472/9563	7.81e-05	0.0202318	0.0188299	FOS/ATF3/NR4A2/EPAS1/NR4A1/FOSB/PAX6/TP63/DBP/MAFB/HLF/MEIS1/ZNF750/ETV3/EHF/ATF4/EGR1	17	CC	down
BP	GO:0052548	regulation of endopeptidase activity	8/115	92/9280	1.71e-05	0.0121301	0.0112427	TNFSF10/TP63/XDH/TIMP3/SFN/MT3/BCL10/PLAUR	8	CC	down
BP	GO:0052547	regulation of peptidase activity	8/115	100/9280	3.14e-05	0.0121301	0.0112427	TNFSF10/TP63/XDH/TIMP3/SFN/MT3/BCL10/PLAUR	8	CC	down
BP	GO:0043281	regulation of cysteine-type endopeptidase activity involved in apoptotic process	7/115	67/9280	1.76e-05	0.0121301	0.0112427	TNFSF10/TP63/XDH/SFN/MT3/BCL10/PLAUR	7	CC	down
BP	GO:0001666	response to hypoxia	7/115	76/9280	4.03e-05	0.0121301	0.0112427	EPAS1/SOD3/MT3/PLAT/PLAU/AQP3/EGR1	7	CC	down
BP	GO:2000116	regulation of cysteine-type endopeptidase activity	7/115	76/9280	4.03e-05	0.0121301	0.0112427	TNFSF10/TP63/XDH/SFN/MT3/BCL10/PLAUR	7	CC	down
BP	GO:0036293	response to decreased oxygen levels	7/115	77/9280	4.39e-05	0.0121301	0.0112427	EPAS1/SOD3/MT3/PLAT/PLAU/AQP3/EGR1	7	CC	down
BP	GO:0030216	keratinocyte differentiation	5/115	50/9280	0.000363742	0.0495255	0.0459027	TXNIP/TP63/SFN/ST14/ZFP36	5	CC	down
BP	GO:0038066	p38MAPK cascade	4/115	24/9280	0.000196364	0.0383666	0.0355601	GADD45B/DUSP1/XDH/ZFP36	4	CC	down
BP	GO:0010837	regulation of keratinocyte proliferation	4/115	25/9280	0.000231543	0.0383666	0.0355601	TP63/SFN/LRG1/ZFP36	4	CC	down
BP	GO:0050891	multicellular organismal water homeostasis	4/115	28/9280	0.000364185	0.0495255	0.0459027	TP63/SFN/LSR/AQP3	4	CC	down
BP	GO:0010951	negative regulation of endopeptidase activity	4/115	29/9280	0.000418442	0.0495255	0.0459027	TIMP3/SFN/MT3/PLAUR	4	CC	down
BP	GO:0030104	water homeostasis	4/115	29/9280	0.000418442	0.0495255	0.0459027	TP63/SFN/LSR/AQP3	4	CC	down
CC	GO:0098636	protein complex involved in cell adhesion	4/128	26/10372	0.00026804	0.0455667	0.0437328	ITGA2/PLAU/PLAUR/ITGA6	4	CC	down
BP	GO:0000289	nuclear-transcribed mRNA poly(A) tail shortening	3/115	10/9280	0.00020881	0.0383666	0.0355601	BTG2/TOB1/ZFP36	3	CC	down
BP	GO:0010558	negative regulation of macromolecule biosynthetic process	14/81	471/9280	4.93e-05	0.00632033	0.00534472	TXNIP/BTG2/IFI27/PER1/MT3/EZR/YBX3/RB1/SMAD3/MDM2/ELF3/GRB7/CRYAB/PER3	14	BC	down
BP	GO:1901700	response to oxygen-containing compound	14/81	480/9280	6.05e-05	0.00635665	0.00537544	GLUL/PCK1/PER1/MT3/AQP3/CYP26B1/EZR/RB1/NQO1/NFKBIA/MDM2/FOS/NTRK2/TGFB2	14	BC	down
BP	GO:0031327	negative regulation of cellular biosynthetic process	14/81	493/9280	8.08e-05	0.00702762	0.00594283	TXNIP/BTG2/IFI27/PER1/MT3/EZR/YBX3/RB1/SMAD3/MDM2/ELF3/GRB7/CRYAB/PER3	14	BC	down
BP	GO:0060429	epithelium development	13/81	446/9280	0.000115384	0.00769841	0.00651008	TXNIP/EVPL/XDH/SFN/CYP26B1/EZR/UGCG/SMAD3/EPHA2/ELF3/KRT27/KRT12/TGFB2	13	BC	down
BP	GO:0045892	negative regulation of DNA-templated transcription	12/81	377/9280	9.5e-05	0.00706319	0.00597291	TXNIP/IFI27/PER1/MT3/EZR/YBX3/RB1/SMAD3/MDM2/ELF3/CRYAB/PER3	12	BC	down
BP	GO:1903507	negative regulation of nucleic acid-templated transcription	12/81	377/9280	9.5e-05	0.00706319	0.00597291	TXNIP/IFI27/PER1/MT3/EZR/YBX3/RB1/SMAD3/MDM2/ELF3/CRYAB/PER3	12	BC	down
BP	GO:1902679	negative regulation of RNA biosynthetic process	12/81	378/9280	9.74e-05	0.00706319	0.00597291	TXNIP/IFI27/PER1/MT3/EZR/YBX3/RB1/SMAD3/MDM2/ELF3/CRYAB/PER3	12	BC	down
BP	GO:0071495	cellular response to endogenous stimulus	12/81	478/9280	0.00083639	0.0332166	0.0280893	PCK1/PER1/MT3/EZR/UGCG/RB1/SMAD3/MDM2/FOS/FGFR3/NTRK2/TGFB2	12	BC	down
BP	GO:0045597	positive regulation of cell differentiation	11/81	333/9280	0.000137783	0.00883932	0.00747487	PCK1/BOC/SFN/CYP26B1/ADIRF/RB1/SMAD3/MDM2/FOS/NIN/TGFB2	11	BC	down
BP	GO:0072359	circulatory system development	11/81	419/9280	0.000973958	0.0369219	0.0312226	GLUL/XDH/RB1/DUSP6/SMAD3/EPHA2/MDM2/TGFBI/NTRK2/DHRS3/TGFB2	11	BC	down
BP	GO:0030855	epithelial cell differentiation	10/81	237/9280	3.74e-05	0.00519749	0.0043952	TXNIP/EVPL/XDH/SFN/CYP26B1/EZR/UGCG/SMAD3/EPHA2/ELF3	10	BC	down
BP	GO:0061061	muscle structure development	10/81	247/9280	5.31e-05	0.00632699	0.00535035	HLF/BTG2/BOC/CYP26B1/YBX3/RB1/SMAD3/MDM2/FOS/SYNE1	10	BC	down
BP	GO:0051336	regulation of hydrolase activity	10/81	289/9280	0.000195203	0.0119617	0.0101153	XDH/SFN/MT3/ASPH/SMAD3/EPHA2/CLDN4/FGFR3/NTRK2/TGFB2	10	BC	down
BP	GO:0043085	positive regulation of catalytic activity	10/81	349/9280	0.000867	0.0336315	0.0284401	XDH/MT3/CLU/ASPH/SMAD3/EPHA2/CLDN4/FGFR3/TGFB2/ADORA2B	10	BC	down
BP	GO:1901701	cellular response to oxygen-containing compound	10/81	368/9280	0.00129725	0.0441593	0.0373429	PCK1/MT3/CYP26B1/EZR/RB1/NQO1/NFKBIA/MDM2/FOS/NTRK2	10	BC	down
BP	GO:0043588	skin development	9/81	109/9280	3.93e-07	0.000131213	0.000110959	TXNIP/EVPL/SFN/CYP26B1/UGCG/CLDN1/CLDN4/KRT27/TGFB2	9	BC	down
BP	GO:0097190	apoptotic signaling pathway	9/81	240/9280	0.000229603	0.0127659	0.0107954	IFI27/SFN/CLU/YBX3/SMAD3/MDM2/UACA/FGFR3/TGFB2	9	BC	down
BP	GO:0060537	muscle tissue development	8/81	158/9280	6.63e-05	0.00645561	0.00545911	HLF/BTG2/CYP26B1/YBX3/RB1/SMAD3/FOS/TGFB2	8	BC	down
BP	GO:0040008	regulation of growth	8/81	227/9280	0.00078428	0.0319068	0.0269817	SFN/MT3/YBX3/RB1/DUSP6/SMAD3/TGFB2/SOCS3	8	BC	down
MF	GO:0031625	ubiquitin protein ligase binding	8/83	130/9563	1.58e-05	0.00254067	0.00226107	TXNIP/PER1/CLU/RB1/SMAD3/NFKBIA/MDM2/PER3	8	BC	down
MF	GO:0044389	ubiquitin-like protein ligase binding	8/83	137/9563	2.31e-05	0.00254067	0.00226107	TXNIP/PER1/CLU/RB1/SMAD3/NFKBIA/MDM2/PER3	8	BC	down
BP	GO:0001666	response to hypoxia	7/81	76/9280	4e-06	0.00104019	0.000879628	EPAS1/MT3/AQP3/SMAD3/MDM2/SOD3/TGFB2	7	BC	down
BP	GO:0036293	response to decreased oxygen levels	7/81	77/9280	4.37e-06	0.00104019	0.000879628	EPAS1/MT3/AQP3/SMAD3/MDM2/SOD3/TGFB2	7	BC	down
BP	GO:0008544	epidermis development	7/81	115/9280	6.1e-05	0.00635665	0.00537544	TXNIP/EVPL/SFN/CYP26B1/UGCG/KRT27/TGFB2	7	BC	down
BP	GO:0050878	regulation of body fluid levels	7/81	139/9280	0.000200796	0.0119617	0.0101153	XDH/SFN/AQP3/CYP26B1/UGCG/CLDN1/CLDN4	7	BC	down
BP	GO:0050673	epithelial cell proliferation	7/81	185/9280	0.00112023	0.0415232	0.0351137	XDH/SFN/RB1/SMAD3/EPHA2/CLDN1/TGFB2	7	BC	down
BP	GO:0050891	multicellular organismal water homeostasis	6/81	28/9280	1.18e-07	7.55e-05	6.39e-05	SFN/AQP3/CYP26B1/UGCG/CLDN1/CLDN4	6	BC	down
BP	GO:0030104	water homeostasis	6/81	29/9280	1.48e-07	7.55e-05	6.39e-05	SFN/AQP3/CYP26B1/UGCG/CLDN1/CLDN4	6	BC	down
BP	GO:0052547	regulation of peptidase activity	6/81	100/9280	0.000227575	0.0127659	0.0107954	XDH/SFN/MT3/ASPH/SMAD3/CLDN4	6	BC	down
BP	GO:0042063	gliogenesis	6/81	111/9280	0.000400619	0.0202495	0.0171238	MT3/CLU/RB1/RRAS2/NTRK2/TGFB2	6	BC	down
BP	GO:0045862	positive regulation of proteolysis	6/81	118/9280	0.000555502	0.0257383	0.0217653	XDH/CLU/ASPH/SMAD3/MDM2/CLDN4	6	BC	down
BP	GO:0009991	response to extracellular stimulus	6/81	124/9280	0.000722255	0.0314173	0.0265677	GLUL/PCK1/MT3/AQP3/FOS/ADORA2B	6	BC	down
BP	GO:0061436	establishment of skin barrier	5/81	15/9280	1.25e-07	7.55e-05	6.39e-05	SFN/CYP26B1/UGCG/CLDN1/CLDN4	5	BC	down
BP	GO:0033561	regulation of water loss via skin	5/81	16/9280	1.81e-07	7.55e-05	6.39e-05	SFN/CYP26B1/UGCG/CLDN1/CLDN4	5	BC	down
BP	GO:0035914	skeletal muscle cell differentiation	5/81	34/9280	1.02e-05	0.00189125	0.00159931	HLF/BTG2/CYP26B1/RB1/FOS	5	BC	down
BP	GO:0031668	cellular response to extracellular stimulus	5/81	91/9280	0.00115703	0.0419551	0.0354789	GLUL/PCK1/AQP3/FOS/ADORA2B	5	BC	down
CC	GO:0016323	basolateral plasma membrane	5/86	75/10372	0.000381419	0.0423093	0.0379087	ANXA1/AQP3/CLDN7/SLC4A7/CLDN1	5	BC	down
CC	GO:0009925	basal plasma membrane	5/86	82/10372	0.000576258	0.0423093	0.0379087	ANXA1/AQP3/CLDN7/SLC4A7/CLDN1	5	BC	down
CC	GO:0045178	basal part of cell	5/86	87/10372	0.000755523	0.0423093	0.0379087	ANXA1/AQP3/CLDN7/SLC4A7/CLDN1	5	BC	down
BP	GO:1902895	positive regulation of miRNA transcription	3/81	26/9280	0.00144119	0.0480783	0.0406569	SMAD3/GNL3/TGFB2	3	BC	down

## Sheet: KEGG
ID	Description	GeneRatio	BgRatio	pvalue	p.adjust	qvalue	geneID	Count	celltype
mcf04151	PI3K-Akt signaling pathway - Macaca fascicularis (crab-eating macaque)	15/124	382/9310	0.000160195	0.00720876	0.00613799	102146285/102126233/102134909/102128947/102137242/102117938/102133302/102136326/102133649/102130245/102133074/102136323/102126663/102126627/101925271	15	TDCE
mcf04210	Apoptosis - Macaca fascicularis (crab-eating macaque)	11/124	147/9310	3.83751e-06	0.00086344	0.000735187	102116556/101925802/102143716/102128802/101864918/102117938/102115080/102125635/101926805/102134104/101867458	11	TDCE
mcf04010	MAPK signaling pathway - Macaca fascicularis (crab-eating macaque)	11/124	305/9310	0.00245046	0.0393824	0.0335326	102146285/102143716/102128947/102116284/102137242/102117938/102136326/102137116/102133074/102115080/102126663	11	TDCE
mcf04380	Osteoclast differentiation - Macaca fascicularis (crab-eating macaque)	8/124	134/9310	0.00040554	0.012678	0.0107948	102143716/102133294/101866179/102121569/102138221/101867458/102145757/102119199	8	TDCE
mcf04145	Phagosome - Macaca fascicularis (crab-eating macaque)	8/124	174/9310	0.0022155	0.0383452	0.0326495	102116556/101925802/102128802/102114855/102133302/102130245/101926805/102136007	8	TDCE
mcf04640	Hematopoietic cell lineage - Macaca fascicularis (crab-eating macaque)	7/124	100/9310	0.00036038	0.012678	0.0107948	102137242/102133302/102136326/102133649/102143442/102136007/101925271	7	TDCE
mcf04530	Tight junction - Macaca fascicularis (crab-eating macaque)	7/124	179/9310	0.00987197	0.100963	0.0859665	101925802/102145576/102128802/102126371/101926805/102119565/102136275	7	TDCE
mcf05164	Influenza A - Macaca fascicularis (crab-eating macaque)	7/124	188/9310	0.0126977	0.121464	0.103422	101925802/102133163/101864918/101866179/102121569/102138221/101867458	7	TDCE
mcf04510	Focal adhesion - Macaca fascicularis (crab-eating macaque)	7/124	212/9310	0.0230192	0.171558	0.146075	101925802/102126233/102133302/102130245/102125340/102126627/101925271	7	TDCE
mcf04014	Ras signaling pathway - Macaca fascicularis (crab-eating macaque)	7/124	244/9310	0.044264	0.245994	0.209455	102128947/102137242/102136326/102133074/102132075/102126663/123566748	7	TDCE
mcf04657	IL-17 signaling pathway - Macaca fascicularis (crab-eating macaque)	6/124	99/9310	0.00201966	0.0378686	0.0322437	102143716/102143028/102122456/101867458/102119199/102121677	6	TDCE
mcf04659	Th17 cell differentiation - Macaca fascicularis (crab-eating macaque)	6/124	108/9310	0.00313081	0.0469622	0.0399865	102143716/101926138/102133649/101866179/102138221/101867458	6	TDCE
mcf04668	TNF signaling pathway - Macaca fascicularis (crab-eating macaque)	6/124	115/9310	0.00427027	0.0600507	0.0511309	102143716/102143028/102117938/102121569/101867458/102145757	6	TDCE
mcf05145	Toxoplasmosis - Macaca fascicularis (crab-eating macaque)	6/124	120/9310	0.00525418	0.0642602	0.0547151	102126233/101866179/102138221/101867458/102126627/101925271	6	TDCE
mcf04915	Estrogen signaling pathway - Macaca fascicularis (crab-eating macaque)	6/124	151/9310	0.0153789	0.128158	0.109121	102143716/102117938/102121829/102120009/102142160/102125635	6	TDCE
mcf05418	Fluid shear stress and atherosclerosis - Macaca fascicularis (crab-eating macaque)	6/124	160/9310	0.0198935	0.159858	0.136113	102116556/101925802/102143716/102116284/101926565/102121489	6	TDCE
mcf04630	JAK-STAT signaling pathway - Macaca fascicularis (crab-eating macaque)	6/124	174/9310	0.0285873	0.1938	0.165014	101926138/102119675/102133649/101866179/102121569/102138221	6	TDCE
mcf04141	Protein processing in endoplasmic reticulum - Macaca fascicularis (crab-eating macaque)	6/124	178/9310	0.0314689	0.2023	0.172251	102117938/101864826/102130004/102140826/102141714/102135500	6	TDCE
mcf04216	Ferroptosis - Macaca fascicularis (crab-eating macaque)	5/124	50/9310	0.000507119	0.012678	0.0107948	101926565/102146166/101926130/102136007/102127229	5	TDCE
mcf04115	p53 signaling pathway - Macaca fascicularis (crab-eating macaque)	5/124	85/9310	0.00542641	0.0642602	0.0547151	102133867/102136678/102130245/102115080/102136323	5	TDCE
mcf05140	Leishmaniasis - Macaca fascicularis (crab-eating macaque)	5/124	85/9310	0.00542641	0.0642602	0.0547151	102143716/102143028/101866179/102138221/101867458	5	TDCE
mcf04512	ECM-receptor interaction - Macaca fascicularis (crab-eating macaque)	5/124	89/9310	0.00658438	0.0740743	0.0630714	102126233/102133302/102130245/102126627/101925271	5	TDCE
mcf04658	Th1 and Th2 cell differentiation - Macaca fascicularis (crab-eating macaque)	5/124	91/9310	0.00722393	0.0773992	0.0659025	102143716/102133649/101866179/102138221/101867458	5	TDCE
mcf04064	NF-kappa B signaling pathway - Macaca fascicularis (crab-eating macaque)	5/124	105/9310	0.0129562	0.121464	0.103422	102143028/102136121/102135886/102115080/101867458	5	TDCE
mcf04928	Parathyroid hormone synthesis, secretion and action - Macaca fascicularis (crab-eating macaque)	5/124	109/9310	0.015035	0.128158	0.109121	102143716/102128326/102117938/102125859/102120009	5	TDCE
mcf04550	Signaling pathways regulating pluripotency of stem cells - Macaca fascicularis (crab-eating macaque)	5/124	143/9310	0.0420032	0.245994	0.209455	102128947/102145310/101925834/101926138/101926136	5	TDCE
mcf04151	PI3K-Akt signaling pathway - Macaca fascicularis (crab-eating macaque)	18/196	382/9310	0.00114095	0.0222923	0.0194931	102130245/102144610/102126663/102117938/102146285/101926380/102134909/102143086/101925733/101866184/102116676/102120952/102133302/102118341/102133756/102146108/102119232/102122296	18	TAC
mcf04010	MAPK signaling pathway - Macaca fascicularis (crab-eating macaque)	17/196	305/9310	0.000234755	0.00596277	0.00521402	101865323/101866525/102143716/102126663/102117938/102146285/102143695/102143086/102135274/102116284/102115080/102118341/102143296/102146108/101926722/102138509/102135480	17	TAC
mcf04110	Cell cycle - Macaca fascicularis (crab-eating macaque)	16/196	176/9310	8.44138e-07	0.000189282	0.000165514	102133867/101925202/102119913/101925531/101925733/102133677/102135274/102133579/101925942/102115080/102142637/102133756/101865340/102145859/102122330/102135480	16	TAC
mcf04218	Cellular senescence - Macaca fascicularis (crab-eating macaque)	13/196	165/9310	4.31921e-05	0.00182847	0.00159887	102122692/101925733/101925942/102115080/102121788/102143296/102144139/102144942/102145859/102143687/102122330/102125414/102135480	13	TAC
mcf04510	Focal adhesion - Macaca fascicularis (crab-eating macaque)	12/196	212/9310	0.00172079	0.0278061	0.0243145	102130245/102144610/102122692/102116676/102120952/102133302/102133756/101865181/102126372/102119232/102122296/102138509	12	TAC
mcf04115	p53 signaling pathway - Macaca fascicularis (crab-eating macaque)	11/196	85/9310	1.49041e-06	0.000189282	0.000165514	102133867/102130245/102136678/102123656/101925733/101925942/102115080/102144139/102139560/102122330/102135480	11	TAC
mcf04210	Apoptosis - Macaca fascicularis (crab-eating macaque)	11/196	147/9310	0.000265601	0.00613298	0.00536286	102116556/102143716/102117938/102120307/101925386/102134104/102122692/102115080/102139560/101867458/102135480	11	TAC
mcf05225	Hepatocellular carcinoma - Macaca fascicularis (crab-eating macaque)	11/196	174/9310	0.00110255	0.0222923	0.0194931	102126663/102122910/101925733/101925399/101926565/102115080/102146720/102133756/102121489/102145859/102135480	11	TAC
mcf04810	Regulation of actin cytoskeleton - Macaca fascicularis (crab-eating macaque)	11/196	242/9310	0.013275	0.124883	0.109202	102144610/102143086/102136171/102133302/102143296/101865181/102116862/101864919/102119232/101926790/102122296	11	TAC
mcf05207	Chemical carcinogenesis - receptor activation - Macaca fascicularis (crab-eating macaque)	10/196	200/9310	0.00963784	0.112642	0.0984979	102143716/102117938/102120307/101926380/102146720/101864813/102145859/102146810/102144318/101926136	10	TAC
mcf04512	ECM-receptor interaction - Macaca fascicularis (crab-eating macaque)	9/196	89/9310	0.000100441	0.00318902	0.00278857	102130245/101866418/102144610/102145946/102116676/102120952/102133302/102119232/102122296	9	TAC
mcf04657	IL-17 signaling pathway - Macaca fascicularis (crab-eating macaque)	9/196	99/9310	0.000228294	0.00596277	0.00521402	102143028/102143716/101926380/102122456/102142258/102133756/101867458/102119199/102121677	9	TAC
mcf04068	FoxO signaling pathway - Macaca fascicularis (crab-eating macaque)	9/196	131/9310	0.00175156	0.0278061	0.0243145	102134909/102123656/101866184/101925942/102115080/101865340/102116967/102122330/102135480	9	TAC
mcf05418	Fluid shear stress and atherosclerosis - Macaca fascicularis (crab-eating macaque)	9/196	160/9310	0.00663577	0.0842742	0.0736919	102116556/101866418/102143716/101926380/101926565/102116284/102146720/102121489/102144942	9	TAC
mcf04141	Protein processing in endoplasmic reticulum - Macaca fascicularis (crab-eating macaque)	9/196	178/9310	0.0128651	0.124883	0.109202	102117938/101925386/101926380/102122692/102142637/102130004/102147278/102141714/102135500	9	TAC
mcf04390	Hippo signaling pathway - Macaca fascicularis (crab-eating macaque)	8/196	161/9310	0.0203703	0.172469	0.150812	102139470/102120307/102142937/102118341/101866775/102133756/102143687/101865447	8	TAC
mcf05160	Hepatitis C - Macaca fascicularis (crab-eating macaque)	8/196	171/9310	0.0279737	0.19737	0.172586	101925386/101925733/102133756/102145576/102145859/102136275/102119565/101867458	8	TAC
mcf04666	Fc gamma R-mediated phagocytosis - Macaca fascicularis (crab-eating macaque)	7/196	104/9310	0.00626624	0.0837698	0.0732508	102143695/102136171/101865181/102116862/102132075/101864919/101926790	7	TAC
mcf04137	Mitophagy - animal - Macaca fascicularis (crab-eating macaque)	7/196	114/9310	0.010191	0.112642	0.0984979	102117938/101925386/102126995/101866092/102143296/102144942/102116967	7	TAC
mcf04380	Osteoclast differentiation - Macaca fascicularis (crab-eating macaque)	7/196	134/9310	0.0229595	0.184635	0.161451	102143716/102133294/101866179/102144942/101867458/102145757/102119199	7	TAC
mcf04114	Oocyte meiosis - Macaca fascicularis (crab-eating macaque)	7/196	136/9310	0.0246599	0.189806	0.165973	101925202/102133677/101925942/102142637/101865340/102143687/102122330	7	TAC
mcf04550	Signaling pathways regulating pluripotency of stem cells - Macaca fascicularis (crab-eating macaque)	7/196	143/9310	0.0312892	0.213045	0.186293	102139470/101925834/102143086/101866775/102133756/102127693/101926136	7	TAC
mcf04710	Circadian rhythm - Macaca fascicularis (crab-eating macaque)	6/196	35/9310	7.86778e-05	0.00285488	0.00249639	101926570/102134000/102142637/102129439/102130020/102143687	6	TAC
mcf04914	Progesterone-mediated oocyte maturation - Macaca fascicularis (crab-eating macaque)	6/196	100/9310	0.0187637	0.164344	0.143708	101926380/102133677/102135274/101925942/101865340/102122330	6	TAC
mcf04064	NF-kappa B signaling pathway - Macaca fascicularis (crab-eating macaque)	6/196	105/9310	0.0232611	0.184635	0.161451	102135886/102143028/102115080/102136121/101867458/102135480	6	TAC
mcf04928	Parathyroid hormone synthesis, secretion and action - Macaca fascicularis (crab-eating macaque)	6/196	109/9310	0.0273425	0.19737	0.172586	102125859/102143716/102117938/102128326/102120009/102136706	6	TAC
mcf04350	TGF-beta signaling pathway - Macaca fascicularis (crab-eating macaque)	6/196	113/9310	0.0318729	0.213045	0.186293	102130245/102139470/102142637/101866775/101866144/102127693	6	TAC
mcf04660	T cell receptor signaling pathway - Macaca fascicularis (crab-eating macaque)	6/196	122/9310	0.0437816	0.259147	0.226606	102143716/101925733/102133756/101865181/102136121/101867458	6	TAC
mcf05220	Chronic myeloid leukemia - Macaca fascicularis (crab-eating macaque)	5/196	80/9310	0.0264958	0.19737	0.172586	101925733/102115080/102145859/101867458/102135480	5	TAC
mcf05140	Leishmaniasis - Macaca fascicularis (crab-eating macaque)	5/196	85/9310	0.0332723	0.216697	0.189486	102143028/102144610/102143716/101866179/101867458	5	TAC
mcf04662	B cell receptor signaling pathway - Macaca fascicularis (crab-eating macaque)	5/196	89/9310	0.0394052	0.250223	0.218802	102143716/102133756/101865181/102136121/101867458	5	TAC
mcf04151	PI3K-Akt signaling pathway - Macaca fascicularis (crab-eating macaque)	30/243	382/9310	5.74016e-08	2.43957e-06	1.9436e-06	102133302/102146285/102140241/102133649/102120952/102116676/101926487/102117938/102118341/102146108/102123512/102144610/102123329/102143086/102128796/102132446/102126233/102135329/102119232/102128759/102141221/102132595/102116249/101867220/101866184/102122296/102130245/102132583/102126663/102127966	30	LSC
mcf04510	Focal adhesion - Macaca fascicularis (crab-eating macaque)	26/243	212/9310	3.80259e-11	4.8483e-09	3.86263e-09	102133302/101925802/102140241/102124156/102120952/102116676/102122692/102133022/101865181/102123512/102144610/102123329/102128796/102126233/102135329/102119232/102122005/102138509/102128759/102141221/101865646/102132595/102116249/101867220/102122296/102130245	26	LSC
mcf04010	MAPK signaling pathway - Macaca fascicularis (crab-eating macaque)	23/243	305/9310	4.47741e-06	9.51449e-05	7.58017e-05	102143716/102137116/102146285/102140241/102116284/101865323/102117938/102118341/102146108/102116823/102115080/102133022/102135285/101926722/102123512/102143086/102135480/102132446/102131632/102138509/102131991/102126663/102127966	23	LSC
mcf04810	Regulation of actin cytoskeleton - Macaca fascicularis (crab-eating macaque)	21/243	242/9310	1.2907e-06	3.04054e-05	2.42239e-05	102133302/102139180/101925802/101867382/102142988/102146291/101865181/101864919/102144610/102123329/102143086/102119232/101926790/102132595/102136171/102142497/102116249/102131991/102122296/102117220/101925123	21	LSC
mcf04512	ECM-receptor interaction - Macaca fascicularis (crab-eating macaque)	17/243	89/9310	9.84385e-11	8.36728e-09	6.66619e-09	102133302/102120952/102116676/101866418/102144610/102123329/102128796/102126233/102119232/102128759/102141221/102132595/102116249/101867504/101867220/102122296/102130245	17	LSC
mcf04210	Apoptosis - Macaca fascicularis (crab-eating macaque)	16/243	147/9310	1.31161e-06	3.04054e-05	2.42239e-05	102116556/102143716/102128802/101864918/101925802/102117938/102115080/102122692/102125659/102135285/102135480/102131632/102125635/102115935/101867458/102134104	16	LSC
mcf05418	Fluid shear stress and atherosclerosis - Macaca fascicularis (crab-eating macaque)	15/243	160/9310	1.77846e-05	0.000348852	0.00027793	102116556/102143716/101925802/101925101/102140241/102116284/101926487/102145462/101866418/102135285/101926565/102122005/101865544/101865646/102116249	15	LSC
mcf05417	Lipid and atherosclerosis - Macaca fascicularis (crab-eating macaque)	15/243	234/9310	0.00119334	0.0132305	0.0105407	102143716/102142258/101864918/101926487/102117938/102123902/102116823/102133022/101865181/102135285/102131632/102144771/101867458/102127272/102126138	15	LSC
mcf04657	IL-17 signaling pathway - Macaca fascicularis (crab-eating macaque)	14/243	99/9310	2.47364e-07	7.88474e-06	6.28175e-06	102143716/102142258/102119199/102115392/102122456/101926487/102146475/102121677/102144082/101867458/102143028/102127272/102126138/102126906	14	LSC
mcf04218	Cellular senescence - Macaca fascicularis (crab-eating macaque)	14/243	165/9310	0.00010161	0.00136371	0.00108647	102138876/102125414/102116823/102115080/102122692/102135480/102135329/102144139/102131991/102127272/102132583/101866825/102145807/102127966	14	LSC
mcf04015	Rap1 signaling pathway - Macaca fascicularis (crab-eating macaque)	13/243	223/9310	0.00561672	0.0406212	0.0323628	102139180/101925802/102140241/102146108/102116823/102133830/102133022/101865181/102123512/102144610/102143086/102131991/102130245	13	LSC
mcf04145	Phagosome - Macaca fascicularis (crab-eating macaque)	12/243	174/9310	0.00198517	0.0187489	0.0149372	102133302/102116556/102128802/101925802/102116211/102144610/101867227/101866438/102116249/101867220/102130245/102140351	12	LSC
mcf04530	Tight junction - Macaca fascicularis (crab-eating macaque)	12/243	179/9310	0.0025154	0.0221182	0.0176215	102128802/101925802/102126371/101867382/102142988/102146291/102144610/102135329/101926790/102142497/102117220/101925123	12	LSC
mcf05410	Hypertrophic cardiomyopathy - Macaca fascicularis (crab-eating macaque)	11/243	103/9310	7.32921e-05	0.0010383	0.000827215	102133302/101925802/101866884/102125659/102144610/102123329/101864882/102141630/102132595/102116249/102122296	11	LSC
mcf05414	Dilated cardiomyopathy - Macaca fascicularis (crab-eating macaque)	11/243	112/9310	0.000156893	0.00200039	0.00159371	102133302/101925802/101866884/102125659/102144610/102123329/101864882/102141630/102132595/102116249/102122296	11	LSC
mcf04668	TNF signaling pathway - Macaca fascicularis (crab-eating macaque)	11/243	115/9310	0.000198599	0.00241156	0.00192128	102143716/102145757/102117938/102116823/102135285/102121569/102132205/101867458/102143028/102126138/102126906	11	LSC
mcf05207	Chemical carcinogenesis - receptor activation - Macaca fascicularis (crab-eating macaque)	11/243	200/9310	0.0156743	0.0853434	0.0679929	102143716/101926136/101925101/102140241/101926487/102117938/102144318/102135329/102146810/102132583/102127966	11	LSC
mcf05100	Bacterial invasion of epithelial cells - Macaca fascicularis (crab-eating macaque)	10/243	82/9310	5.01138e-05	0.000798688	0.000636313	101925802/101867382/102123512/102144610/102119232/101926790/102122005/101865646/102142497/101925123	10	LSC
mcf05412	Arrhythmogenic right ventricular cardiomyopathy - Macaca fascicularis (crab-eating macaque)	10/243	85/9310	6.84503e-05	0.00102675	0.000818013	102133302/101925802/102145051/102125659/102144610/102123329/102132595/102116249/102130569/102122296	10	LSC
mcf04066	HIF-1 signaling pathway - Macaca fascicularis (crab-eating macaque)	10/243	125/9310	0.00156222	0.0159347	0.0126951	102140241/102141145/101866092/101865926/102121518/102144412/101926565/102144217/102132583/101865076	10	LSC
mcf05225	Hepatocellular carcinoma - Macaca fascicularis (crab-eating macaque)	10/243	174/9310	0.01573	0.0853434	0.0679929	101925802/101925101/102115080/102123512/102122910/101926565/102135480/102135329/102126663/102127966	10	LSC
mcf04814	Motor proteins - Macaca fascicularis (crab-eating macaque)	10/243	209/9310	0.0471537	0.193939	0.154511	102128802/101925802/102116211/101866884/101864882/101866391/102141630/101866438/102145906/102117220	10	LSC
mcf05146	Amoebiasis - Macaca fascicularis (crab-eating macaque)	9/243	110/9310	0.00227689	0.020736	0.0165203	101865323/102120952/102116676/102128796/102126233/102119232/102128759/102127272/102126138	9	LSC
mcf05145	Toxoplasmosis - Macaca fascicularis (crab-eating macaque)	9/243	120/9310	0.00409709	0.0326487	0.0260112	102120952/102116676/102116823/102135285/102144610/102128796/102126233/101867458/102135411	9	LSC
mcf03008	Ribosome biogenesis in eukaryotes - Macaca fascicularis (crab-eating macaque)	9/243	125/9310	0.00535656	0.0401742	0.0320067	102133660/102128516/102130892/101867076/101926085/102131987/102119653/102131118/102122032	9	LSC
mcf04068	FoxO signaling pathway - Macaca fascicularis (crab-eating macaque)	9/243	131/9310	0.00724245	0.0482732	0.0384592	101864918/102123902/102115080/102135480/102135329/102116967/101866184/101866825/102131018	9	LSC
mcf04380	Osteoclast differentiation - Macaca fascicularis (crab-eating macaque)	9/243	134/9310	0.00835782	0.0519816	0.0414136	102143716/102145757/102133294/102119199/102115392/102135285/102121569/101867458/102135411	9	LSC
mcf04115	p53 signaling pathway - Macaca fascicularis (crab-eating macaque)	8/243	85/9310	0.00163436	0.0160293	0.0127705	102133867/102136678/101865419/102115080/102135480/102135329/102144139/102130245	8	LSC
mcf04061	Viral protein interaction with cytokine and cytokine receptor - Macaca fascicularis (crab-eating macaque)	8/243	100/9310	0.00452729	0.0349836	0.0278713	101925898/101864918/102119675/102135285/101926138/102127272/102126138/102126906	8	LSC
mcf04666	Fc gamma R-mediated phagocytosis - Macaca fascicularis (crab-eating macaque)	8/243	104/9310	0.00573475	0.0406212	0.0323628	101867382/101865181/101864919/101926790/102136171/102142497/102139983/101925123	8	LSC
mcf04064	NF-kappa B signaling pathway - Macaca fascicularis (crab-eating macaque)	8/243	105/9310	0.00607174	0.0418458	0.0333384	102115080/102135886/102135285/102135480/101867458/102143028/102127272/102126138	8	LSC
mcf04928	Parathyroid hormone synthesis, secretion and action - Macaca fascicularis (crab-eating macaque)	8/243	109/9310	0.00757227	0.0482732	0.0384592	102143716/102125859/102117938/102136706/102120009/102132205/102144082/102128326	8	LSC
mcf04919	Thyroid hormone signaling pathway - Macaca fascicularis (crab-eating macaque)	8/243	128/9310	0.0187473	0.0962879	0.0767124	101925802/101866092/102135329/101866484/102116249/102124503/102144217/102127966	8	LSC
mcf04926	Relaxin signaling pathway - Macaca fascicularis (crab-eating macaque)	8/243	132/9310	0.0221171	0.104442	0.0832086	102143716/102142258/102140241/102117938/101865544/102128759/102144082/101867458	8	LSC
mcf05211	Renal cell carcinoma - Macaca fascicularis (crab-eating macaque)	7/243	75/9310	0.00332126	0.02732	0.0217658	102124613/102140241/101866092/101865926/102133022/102123512/102144217	7	LSC
mcf01230	Biosynthesis of amino acids - Macaca fascicularis (crab-eating macaque)	7/243	87/9310	0.00751819	0.0482732	0.0384592	102141145/101866609/101926704/102136564/101925784/101865874/101865076	7	LSC
mcf04933	AGE-RAGE signaling pathway in diabetic complications - Macaca fascicularis (crab-eating macaque)	7/243	104/9310	0.01888	0.0962879	0.0767124	102140241/102135329/102119232/101865544/102128759/102127272/102128326	7	LSC
mcf04974	Protein digestion and absorption - Macaca fascicularis (crab-eating macaque)	7/243	105/9310	0.0197949	0.097071	0.0773362	101867392/102132120/101866484/102128759/102126265/102137453/102124503	7	LSC
mcf05323	Rheumatoid arthritis - Macaca fascicularis (crab-eating macaque)	7/243	105/9310	0.0197949	0.097071	0.0773362	102116556/102143716/102142258/102140241/102127272/102126138/102126906	7	LSC
mcf04350	TGF-beta signaling pathway - Macaca fascicularis (crab-eating macaque)	7/243	113/9310	0.0282517	0.128646	0.102492	101866144/101866775/102125691/102135455/102130245/101866825/102127966	7	LSC
mcf04670	Leukocyte transendothelial migration - Macaca fascicularis (crab-eating macaque)	7/243	120/9310	0.0374243	0.164538	0.131087	101925802/102142988/102146291/102133022/101865181/102144610/101865544	7	LSC
mcf04935	Growth hormone synthesis, secretion and action - Macaca fascicularis (crab-eating macaque)	7/243	124/9310	0.0434566	0.18469	0.147142	102143716/102145757/102117938/102116823/102121569/102144139/102135411	7	LSC
mcf04610	Complement and coagulation cascades - Macaca fascicularis (crab-eating macaque)	6/243	87/9310	0.0259358	0.120248	0.095801	102145462/102135886/102139334/102130704/102143442/102146832	6	LSC
mcf04912	GnRH signaling pathway - Macaca fascicularis (crab-eating macaque)	6/243	98/9310	0.0428325	0.18469	0.147142	102117938/102116823/102120009/101865544/102132205/102128326	6	LSC
mcf04060	Cytokine-cytokine receptor interaction - Macaca fascicularis (crab-eating macaque)	17/177	301/9310	5.70331e-05	0.002228	0.00188578	102142320/101864918/101926138/102119675/102133649/102126701/102139560/101925898/102146317/102138221/102136357/102126906/102127272/102133941/102136544/102135285/102126138	17	CC
mcf04210	Apoptosis - Macaca fascicularis (crab-eating macaque)	16/177	147/9310	1.65087e-08	4.04464e-06	3.42339e-06	102143716/102116556/102115080/101864918/101925802/102128802/102139560/102135480/101926805/102125635/101925224/102134104/101867458/102115935/102117938/102135285	16	CC
mcf04010	MAPK signaling pathway - Macaca fascicularis (crab-eating macaque)	16/177	305/9310	0.00022303	0.00483215	0.00408994	102143716/102137116/101865323/102115080/102146285/102116284/102133022/102136160/102135480/102146317/102123512/102126663/102117938/101926722/102135285/102133074	16	CC
mcf04151	PI3K-Akt signaling pathway - Macaca fascicularis (crab-eating macaque)	15/177	382/9310	0.00610737	0.0578953	0.0490027	102133302/102146285/102133649/102126233/102116676/102123512/101925224/102126663/102117938/102119232/102137879/101925271/102140628/102122296/102133074	15	CC
mcf05417	Lipid and atherosclerosis - Macaca fascicularis (crab-eating macaque)	13/177	234/9310	0.000510711	0.00834161	0.00706035	102143716/101864918/101865181/102139560/102123902/102133022/102127272/102142258/102140826/101867458/102117938/102135285/102126138	13	CC
mcf04510	Focal adhesion - Macaca fascicularis (crab-eating macaque)	12/177	212/9310	0.000710802	0.0108842	0.00921237	102133302/101865181/101925802/102126233/102133022/102116676/102126372/102123512/102119232/102137879/101925271/102122296	12	CC
mcf04657	IL-17 signaling pathway - Macaca fascicularis (crab-eating macaque)	11/177	99/9310	2.54001e-06	0.000142739	0.000120814	102143716/102122456/102121677/102119199/102115392/102126906/102127272/102142258/102133941/101867458/102126138	11	CC
mcf04061	Viral protein interaction with cytokine and cytokine receptor - Macaca fascicularis (crab-eating macaque)	11/177	100/9310	2.80737e-06	0.000142739	0.000120814	101864918/101926138/102119675/102139560/101925898/102126906/102127272/102133941/102136544/102135285/102126138	11	CC
mcf04668	TNF signaling pathway - Macaca fascicularis (crab-eating macaque)	10/177	115/9310	6.36571e-05	0.002228	0.00188578	102143716/102145757/102132875/102126906/102133941/101867458/102117938/102135285/102121569/102126138	10	CC
mcf04380	Osteoclast differentiation - Macaca fascicularis (crab-eating macaque)	10/177	134/9310	0.000228299	0.00483215	0.00408994	102143716/102145757/102133294/102119199/102146317/102138221/102115392/101867458/102135285/102121569	10	CC
mcf05164	Influenza A - Macaca fascicularis (crab-eating macaque)	10/177	188/9310	0.00309745	0.0379437	0.0321157	102133163/101864918/102137447/101925802/102139560/102138221/102127272/101867458/102135285/102121569	10	CC
mcf04810	Regulation of actin cytoskeleton - Macaca fascicularis (crab-eating macaque)	10/177	242/9310	0.0170812	0.123976	0.104933	102133302/101865181/102146291/101925802/102139180/101867382/101926790/102119232/101925271/102122296	10	CC
mcf04064	NF-kappa B signaling pathway - Macaca fascicularis (crab-eating macaque)	9/177	105/9310	0.000166124	0.00452227	0.00382766	102115080/102135480/102146317/102135886/102136121/102127272/101867458/102135285/102126138	9	CC
mcf05146	Amoebiasis - Macaca fascicularis (crab-eating macaque)	9/177	110/9310	0.000236677	0.00483215	0.00408994	101865323/102126233/102146317/102116676/102127272/102131487/101866493/102119232/102126138	9	CC
mcf05418	Fluid shear stress and atherosclerosis - Macaca fascicularis (crab-eating macaque)	9/177	160/9310	0.00341935	0.0385596	0.0326369	102143716/102116556/102116284/101926565/101925802/102146317/102145462/102135285/102138414	9	CC
mcf04062	Chemokine signaling pathway - Macaca fascicularis (crab-eating macaque)	9/177	198/9310	0.0132197	0.107356	0.0908663	101865181/102126701/102133022/101925898/102126906/102127272/102133941/101867458/102126138	9	CC
mcf04814	Motor proteins - Macaca fascicularis (crab-eating macaque)	9/177	209/9310	0.0182169	0.123976	0.104933	101925802/102128802/101864882/101865091/101866884/101926805/102130120/101866438/101866391	9	CC
mcf04512	ECM-receptor interaction - Macaca fascicularis (crab-eating macaque)	8/177	89/9310	0.000277292	0.00522588	0.00442319	102133302/102126233/102116676/101867504/102119232/102137879/101925271/102122296	8	CC
mcf04068	FoxO signaling pathway - Macaca fascicularis (crab-eating macaque)	8/177	131/9310	0.00346249	0.0385596	0.0326369	102115080/101864918/102123902/102135480/101866825/102117763/102116967/102131018	8	CC
mcf05225	Hepatocellular carcinoma - Macaca fascicularis (crab-eating macaque)	8/177	174/9310	0.017883	0.123976	0.104933	102115080/102122910/101926565/101925802/102135480/102123512/102126663/102138414	8	CC
mcf04530	Tight junction - Macaca fascicularis (crab-eating macaque)	8/177	179/9310	0.0208235	0.124433	0.105321	102146291/101925802/102128802/102145576/101867382/101926805/101926790/102126371	8	CC
mcf04115	p53 signaling pathway - Macaca fascicularis (crab-eating macaque)	7/177	85/9310	0.00113042	0.0153863	0.013023	102136678/102133867/102115080/102139392/102139560/102135480/102140628	7	CC
mcf05323	Rheumatoid arthritis - Macaca fascicularis (crab-eating macaque)	7/177	105/9310	0.00379804	0.0404573	0.0342432	102143716/102116556/102126906/102127272/102142258/102133941/102126138	7	CC
mcf04659	Th17 cell differentiation - Macaca fascicularis (crab-eating macaque)	7/177	108/9310	0.00443763	0.0453008	0.0383427	102143716/101926138/102133649/102146317/102138221/101866092/101867458	7	CC
mcf05145	Toxoplasmosis - Macaca fascicularis (crab-eating macaque)	7/177	120/9310	0.00783689	0.0711126	0.0601898	102126233/102138221/102116676/101867458/102135285/102124789/101925271	7	CC
mcf04550	Signaling pathways regulating pluripotency of stem cells - Macaca fascicularis (crab-eating macaque)	7/177	143/9310	0.0192011	0.124314	0.105219	101926138/101925834/101926136/102127693/102145310/102139470/101866775	7	CC
mcf04630	JAK-STAT signaling pathway - Macaca fascicularis (crab-eating macaque)	7/177	174/9310	0.0481188	0.245606	0.207882	101926138/102119675/102133649/102138221/102136357/101925224/102121569	7	CC
mcf04610	Complement and coagulation cascades - Macaca fascicularis (crab-eating macaque)	6/177	87/9310	0.00614399	0.0578953	0.0490027	102130704/102143442/102139334/102135886/102145462/102131431	6	CC
mcf04640	Hematopoietic cell lineage - Macaca fascicularis (crab-eating macaque)	6/177	100/9310	0.0118611	0.100206	0.0848147	102133302/102143442/102133649/102146317/101867504/101925271	6	CC
mcf05410	Hypertrophic cardiomyopathy - Macaca fascicularis (crab-eating macaque)	6/177	103/9310	0.0135838	0.107356	0.0908663	102133302/101925802/101864882/101866884/101925271/102122296	6	CC
mcf04928	Parathyroid hormone synthesis, secretion and action - Macaca fascicularis (crab-eating macaque)	6/177	109/9310	0.0175404	0.123976	0.104933	102143716/102125859/102136706/102120009/102117938/102128326	6	CC
mcf05414	Dilated cardiomyopathy - Macaca fascicularis (crab-eating macaque)	6/177	112/9310	0.0197887	0.124314	0.105219	102133302/101925802/101864882/101866884/101925271/102122296	6	CC
mcf04350	TGF-beta signaling pathway - Macaca fascicularis (crab-eating macaque)	6/177	113/9310	0.0205798	0.124433	0.105321	102127693/102139470/101866825/101866775/102135455/101866144	6	CC
mcf04918	Thyroid hormone synthesis - Macaca fascicularis (crab-eating macaque)	5/177	76/9310	0.0146349	0.112049	0.0948382	102121293/101866484/102133444/102140826/102117938	5	CC
mcf05100	Bacterial invasion of epithelial cells - Macaca fascicularis (crab-eating macaque)	5/177	82/9310	0.0197486	0.124314	0.105219	101925802/101867382/101926790/102123512/102119232	5	CC
mcf04662	B cell receptor signaling pathway - Macaca fascicularis (crab-eating macaque)	5/177	89/9310	0.0270491	0.157786	0.133551	102143716/101865181/102136121/101867458/102146566	5	CC
mcf04658	Th1 and Th2 cell differentiation - Macaca fascicularis (crab-eating macaque)	5/177	91/9310	0.0294121	0.16758	0.14184	102143716/102133649/102132875/102138221/101867458	5	CC
mcf05142	Chagas disease - Macaca fascicularis (crab-eating macaque)	5/177	102/9310	0.0447114	0.23307	0.197271	102143716/102138221/102127272/101867458/102135285	5	CC
mcf04151	PI3K-Akt signaling pathway - Macaca fascicularis (crab-eating macaque)	19/132	382/9310	1.65681e-06	7.42251e-05	6.20867e-05	102130245/102146285/102133302/102116676/102126233/102134909/102133649/102136323/102120952/102118341/102119232/102116249/102126627/102122296/102146108/101866184/102128947/102132446/102144610	19	BC
mcf04512	ECM-receptor interaction - Macaca fascicularis (crab-eating macaque)	13/132	89/9310	2.90016e-10	6.49636e-08	5.43399e-08	102130245/102133302/101867504/102116676/102126233/101866418/102120952/102126789/102119232/102116249/102126627/102122296/102144610	13	BC
mcf04510	Focal adhesion - Macaca fascicularis (crab-eating macaque)	13/132	212/9310	9.08075e-06	0.000339015	0.000283574	101925802/102130245/102126372/102133302/102116676/102126233/102120952/102125340/102119232/102116249/102126627/102122296/102144610	13	BC
mcf04810	Regulation of actin cytoskeleton - Macaca fascicularis (crab-eating macaque)	12/132	242/9310	0.000160123	0.00398528	0.00333355	101925802/102133302/102143296/102146291/102136171/102119232/102116249/102122296/102142497/102128947/101926790/102144610	12	BC
mcf04010	MAPK signaling pathway - Macaca fascicularis (crab-eating macaque)	12/132	305/9310	0.00127915	0.0168547	0.0140984	102146285/102137116/102135285/102143296/102118341/101865323/101926722/102146108/102143716/102128947/102132446/101925182	12	BC
mcf04530	Tight junction - Macaca fascicularis (crab-eating macaque)	10/132	179/9310	0.000221181	0.00495446	0.00414424	101925802/102128802/102145576/102146291/102126371/102136275/102119565/102142497/101926790/102144610	10	BC
mcf05145	Toxoplasmosis - Macaca fascicularis (crab-eating macaque)	9/132	120/9310	4.88111e-05	0.00136671	0.00114321	102116676/102126233/102135285/101867458/102120952/102126627/102144610/101925182/102127361	9	BC
mcf05418	Fluid shear stress and atherosclerosis - Macaca fascicularis (crab-eating macaque)	9/132	160/9310	0.000436654	0.00866049	0.00724421	102116556/101925802/101926565/101866418/102135285/102126789/102121489/102116249/102143716	9	BC
mcf05160	Hepatitis C - Macaca fascicularis (crab-eating macaque)	8/132	171/9310	0.0029371	0.0328956	0.027516	102145576/102135285/101867458/102145859/102136275/102119565/102121569/102127361	8	BC
mcf05410	Hypertrophic cardiomyopathy - Macaca fascicularis (crab-eating macaque)	7/132	103/9310	0.000628844	0.0108355	0.0090635	101925802/102133302/101864882/102116249/102122296/102144610/101925182	7	BC
mcf05146	Amoebiasis - Macaca fascicularis (crab-eating macaque)	7/132	110/9310	0.000930628	0.0148901	0.012455	102116676/102126233/102120952/101865323/102119232/102126627/101925182	7	BC
mcf05414	Dilated cardiomyopathy - Macaca fascicularis (crab-eating macaque)	7/132	112/9310	0.00103502	0.0154563	0.0129287	101925802/102133302/101864882/102116249/102122296/102144610/101925182	7	BC
mcf04380	Osteoclast differentiation - Macaca fascicularis (crab-eating macaque)	7/132	134/9310	0.0029016	0.0328956	0.027516	102135285/101867458/102143716/102145757/102133294/101925182/102121569	7	BC
mcf04210	Apoptosis - Macaca fascicularis (crab-eating macaque)	7/132	147/9310	0.00483847	0.0492644	0.041208	102116556/101925802/102128802/102135285/101867458/102139560/102143716	7	BC
mcf04514	Cell adhesion molecules - Macaca fascicularis (crab-eating macaque)	7/132	157/9310	0.00689398	0.0547761	0.0458183	102145576/101866418/102126789/102116249/102136275/102119565/102144610	7	BC
mcf04390	Hippo signaling pathway - Macaca fascicularis (crab-eating macaque)	7/132	161/9310	0.00787607	0.056911	0.0476041	101925802/102128309/102118341/102142937/102146086/101865447/101925182	7	BC
mcf04145	Phagosome - Macaca fascicularis (crab-eating macaque)	7/132	174/9310	0.0117871	0.0825099	0.0690167	102116556/101925802/102130245/102128802/102133302/102116249/102144610	7	BC
mcf04360	Axon guidance - Macaca fascicularis (crab-eating macaque)	7/132	186/9310	0.0164998	0.108704	0.0909276	102119387/102135388/102122350/102136171/102146108/102144069/102144610	7	BC
mcf04115	p53 signaling pathway - Macaca fascicularis (crab-eating macaque)	6/132	85/9310	0.00126846	0.0168547	0.0140984	102133867/102136678/102130245/102136323/102139392/102139560	6	BC
mcf04668	TNF signaling pathway - Macaca fascicularis (crab-eating macaque)	6/132	115/9310	0.00578392	0.0539832	0.0451551	102143028/102135285/101867458/102143716/102145757/102121569	6	BC
mcf04670	Leukocyte transendothelial migration - Macaca fascicularis (crab-eating macaque)	6/132	120/9310	0.00709155	0.0547761	0.0458183	101925802/102145576/102146291/102136275/102119565/102144610	6	BC
mcf04218	Cellular senescence - Macaca fascicularis (crab-eating macaque)	6/132	165/9310	0.0297719	0.170998	0.143034	102145807/102136323/102143296/102145859/102146086/101925182	6	BC
mcf05225	Hepatocellular carcinoma - Macaca fascicularis (crab-eating macaque)	6/132	174/9310	0.0371723	0.198405	0.165959	101925802/101926565/102145859/102121489/102146086/101925182	6	BC
mcf05220	Chronic myeloid leukemia - Macaca fascicularis (crab-eating macaque)	5/132	80/9310	0.00546069	0.0531824	0.0444853	102136323/101867458/102145859/102146086/101925182	5	BC
mcf05100	Bacterial invasion of epithelial cells - Macaca fascicularis (crab-eating macaque)	5/132	82/9310	0.00606055	0.0543025	0.0454222	101925802/102119232/102142497/101926790/102144610	5	BC
mcf05140	Leishmaniasis - Macaca fascicularis (crab-eating macaque)	5/132	85/9310	0.00704519	0.0547761	0.0458183	102143028/101867458/102143716/102144610/101925182	5	BC
mcf05412	Arrhythmogenic right ventricular cardiomyopathy - Macaca fascicularis (crab-eating macaque)	5/132	85/9310	0.00704519	0.0547761	0.0458183	101925802/102133302/102116249/102122296/102144610	5	BC
mcf04610	Complement and coagulation cascades - Macaca fascicularis (crab-eating macaque)	5/132	87/9310	0.00776062	0.056911	0.0476041	102135886/102135485/102143442/102143404/102131431	5	BC
mcf04659	Th17 cell differentiation - Macaca fascicularis (crab-eating macaque)	5/132	108/9310	0.0185277	0.115284	0.0964309	101926138/102133649/101867458/102146086/102143716	5	BC
mcf04068	FoxO signaling pathway - Macaca fascicularis (crab-eating macaque)	5/132	131/9310	0.0383592	0.198731	0.166232	102134909/102136323/102146086/101866184/101925182	5	BC
