# Supplementary material for: Long-read single-cell RNA sequencing analysis of key genes and isoforms during corneal wound healing in cynomolgus monkeys
Source: Research Square preprint supplement (doi:10.21203/rs.3.rs-5232061/v1), 2025-03-05
Supplement: Supplementary file 19 [file Supplementary Data6_Extracellular matrix-related genes.xlsx]

## Sheet: Sheet1
gene	annotation
COL11A2	Collagen type XI alpha 2 chain.
COL12A1	Collagen type XII alpha 1 chain.
COL14A1	Collagen type XIV alpha 1 chain.
COL16A1	Collagen type XVI alpha 1 chain.
COL17A1	Collagen type XVII alpha 1 chain.
COL18A1	Collagen type XVIII alpha 1 chain.
COL1A1	Collagen type I alpha 1 chain.
COL1A2	Collagen type I alpha 2 chain.
COL21A1	Collagen type XXI alpha 1 chain.
COL22A1	Collagen type XXII alpha 1 chain.
COL23A1	Collagen type XXIII alpha 1 chain.
COL24A1	Collagen type XXIV alpha 1 chain.
COL27A1	Collagen type XXVII alpha 1 chain.
COL3A1	Collagen type III alpha 1 chain.
COL4A1	Collagen type IV alpha 1 chain.
COL4A2	Collagen type IV alpha 2 chain.
COL4A3	Collagen type IV alpha 3 chain.
COL4A4	Collagen type IV alpha 4 chain.
COL4A5	Collagen type IV alpha 5 chain.
COL4A6	Collagen type IV alpha 6 chain.
COL5A1	Collagen type V alpha 1 chain.
COL5A2	Collagen type V alpha 2 chain.
COL5A3	Collagen type V alpha 3 chain.
COL6A1	Collagen type VI alpha 1 chain.
COL6A2	Collagen type VI alpha 2 chain.
COL6A3	Collagen type VI alpha 3 chain.
COL7A1	Collagen type VII alpha 1 chain.
COL8A1	Collagen type VIII alpha 1 chain.
COL8A2	Collagen type VIII alpha 2 chain.
COL9A1	Collagen type IX alpha 1 chain.
FN1	Fibronectin 1.
LAMA2	Laminin subunit alpha 2.
LAMA3	Laminin subunit alpha 3.
LAMA4	Laminin subunit alpha 4.
LAMA5	Laminin subunit alpha 5.
LAMB1	Laminin subunit beta 1.
LAMB2	Laminin subunit beta 2.
LAMB3	Laminin subunit beta 3.
LAMC1	Laminin subunit gamma 1.
LAMC2	Laminin subunit gamma 2.
