# Supplementary material for: Long-read single-cell RNA sequencing analysis of key genes and isoforms during corneal wound healing in cynomolgus monkeys
Source: Research Square preprint supplement (doi:10.21203/rs.3.rs-5232061/v1), 2025-03-05
Supplement: Supplementary file 21 [file Supplementary Data7_ITG genes.xlsx]

## Sheet: Sheet1
gene	annotation
ITGA1	Integrin subunit alpha 1; Belongs to the integrin alpha chain family.
ITGA10	Integrin subunit alpha 10; Belongs to the integrin alpha chain family.
ITGA2	Integrin subunit alpha 2; Belongs to the integrin alpha chain family.
ITGA2B	Integrin subunit alpha 2b; Belongs to the integrin alpha chain family.
ITGA3	Integrin subunit alpha 3; Belongs to the integrin alpha chain family.
ITGA5	Integrin subunit alpha 5; Belongs to the integrin alpha chain family.
ITGA6	Integrin subunit alpha 6; Belongs to the integrin alpha chain family.
ITGA8	Integrin subunit alpha 8; Belongs to the integrin alpha chain family.
ITGAD	Integrin subunit alpha D; Belongs to the integrin alpha chain family.
ITGAE	Integrin subunit alpha E; Belongs to the integrin alpha chain family.
ITGAV	Integrin subunit alpha V; Belongs to the integrin alpha chain family.
ITGAX	Integrin subunit alpha X; Belongs to the integrin alpha chain family.
ITGB1	Integrin beta; Belongs to the integrin beta chain family.
ITGB2	Integrin beta.
ITGB4	Integrin beta.
ITGB5	Integrin beta; Belongs to the integrin beta chain family.
ITGB6	Integrin beta; Belongs to the integrin beta chain family.
ITGB7	Integrin beta; Belongs to the integrin beta chain family.
ITGB8	Integrin beta; Belongs to the integrin beta chain family.
LYN	Tyrosine-protein kinase.
PMP22	Peripheral myelin protein 22; Might be involved in growth regulation, and in myelinization in the peripheral nervous system; Belongs to the PMP-22/EMP/MP20 family.
