# Supplementary material for: Long-read single-cell RNA sequencing analysis of key genes and isoforms during corneal wound healing in cynomolgus monkeys
Source: Research Square preprint supplement (doi:10.21203/rs.3.rs-5232061/v1), 2025-03-05
Supplement: Supplementary file 23 [file Supplementary Data8_MMP family genes.xlsx]

## Sheet: Sheet1
gene	annotation
MMP1	Matrix metallopeptidase 1.
MMP10	Matrix metallopeptidase 10.
MMP11	Matrix metallopeptidase 11.
MMP12	Matrix metallopeptidase 12.
MMP13	Matrix metallopeptidase 13.
MMP14	Matrix metallopeptidase 14.
MMP15	Matrix metallopeptidase 15.
MMP19	Matrix metallopeptidase 19.
MMP2	Matrix metallopeptidase 2.
MMP23B	Matrix metallopeptidase 23B.
MMP25	Matrix metallopeptidase 25.
MMP28	Matrix metallopeptidase 28.
MMP3	Matrix metallopeptidase 3.
MMP7	Matrix metallopeptidase 7.
MMP9	Matrix metallopeptidase 9.
