# Supplementary material for: Long-read single-cell RNA sequencing analysis of key genes and isoforms during corneal wound healing in cynomolgus monkeys
Source: Research Square preprint supplement (doi:10.21203/rs.3.rs-5232061/v1), 2025-03-05
Supplement: Supplementary file 25 [file Supplementary Data9_hdWGCNA module assignment table.xlsx]

## Sheet: Sheet1
gene_name	module	color	kME_grey	kME_blue	kME_tan	kME_red	kME_green	kME_pink	kME_yellow	kME_cyan	kME_turquoise	kME_salmon	kME_purple	kME_black	kME_greenyellow	kME_brown	kME_magenta
ENSMFAG00000031950	black	black	0.167263	0.112115	-0.04054	0.0247656	0.233904	0.146672	0.059461	0.263	0.225369	-0.119436	0.167291	0.311004	0.0264139	-0.111179	0.00161388
MACF1	black	black	0.244657	0.194687	0.353476	0.217608	-0.026155	0.320002	-0.0639906	0.157719	0.237333	0.0763857	-0.213616	0.293676	0.0290286	-0.236928	0.101345
SLC4A7	black	black	0.0988191	0.0198691	0.132075	0.0761632	-0.038524	0.208913	-0.0326749	0.097166	0.0984424	0.0182558	-0.0637003	0.217098	0.0373834	-0.130075	-0.0502169
TNFAIP1	black	black	0.108872	0.103341	0.0482305	0.000727307	0.124883	0.0946601	-0.0282912	0.145997	0.182502	-0.045909	0.0554445	0.236704	-0.0207913	-0.135229	0.0190037
AGFG1	black	black	0.0657259	0.0361572	0.00489999	0.0280019	0.0495779	0.131822	-0.0491665	0.109513	0.117494	-0.0695417	0.0525427	0.204883	0.0227585	-0.11338	-0.0283695
HBEGF	black	black	0.0293594	0.0403537	-0.00956417	-0.0226447	0.0757518	0.137806	-0.106118	0.142314	0.23139	-0.14755	0.121131	0.403512	-0.00963121	-0.172366	-0.0545538
EIF4E	black	black	0.138827	0.0918403	0.0747956	0.0978638	0.0404221	0.172032	-0.0124699	0.11227	0.143406	-0.0408405	-0.0201399	0.204084	0.0271055	-0.0765207	0.0301717
ACTR3	black	black	0.177516	0.136738	0.0417942	0.0534035	0.212694	0.139905	0.00961867	0.242831	0.215396	-0.0120767	0.110725	0.272096	0.0290202	-0.132131	0.0298993
ENSMFAG00000000396	black	black	0.0253907	-0.0355685	-0.0663057	0.012342	-0.00257263	0.148709	-0.0371124	0.081699	0.06523	-0.0983537	0.0766367	0.213484	0.0585277	-0.0581253	-0.110749
SERPINB2	black	black	-0.0321216	0.0460917	-0.19129	-0.206255	0.295152	0.0106346	-0.218938	0.263817	0.359734	-0.279395	0.382642	0.559369	-0.0864384	-0.289235	-0.148984
FBXW11	black	black	0.111078	0.104355	0.046405	0.0462047	0.0654963	0.0852564	-0.0602356	0.0815373	0.152324	-0.0557744	0.0431009	0.195455	0.00114111	-0.0864924	0.0423084
ELOVL1	black	black	0.10433	0.0888827	0.0121536	0.0433764	0.0991047	0.117159	-0.0373693	0.120087	0.150296	-0.0834193	0.0685908	0.205724	0.0120659	-0.0912835	0.00540803
DNAJA2	black	black	0.180966	0.12061	0.105504	0.0836271	0.0604399	0.228257	-0.000724456	0.17462	0.210077	-0.0846035	-0.0269462	0.296239	0.00985813	-0.141842	0.0104321
EIF3A	black	black	0.195352	0.137187	0.155677	0.155307	0.0325844	0.22092	-0.0368407	0.125757	0.172403	0.01079	-0.0313636	0.233448	0.0425428	-0.110638	0.0754847
POLR3E	black	black	0.123777	0.102467	0.110759	0.0814282	0.0246416	0.127826	-0.0238027	0.0733733	0.115761	-0.0133909	-0.0292628	0.13154	0.00139604	-0.0594483	0.0705594
TXNL4A	black	black	0.196904	0.13357	0.0631297	0.101376	0.12725	0.19728	0.0769735	0.194912	0.179367	-0.0494817	0.00493293	0.213505	0.0358085	-0.0937027	0.0446203
PDF	black	black	0.115547	0.0801454	-0.00570898	0.037892	0.117021	0.124049	0.00788277	0.135176	0.123821	-0.0671639	0.08412	0.175205	0.0260965	-0.0835682	-0.00904942
KCNK1	black	black	0.0536921	0.0529262	0.0417717	-0.011953	0.0589519	0.0672806	-0.0940917	0.0610988	0.132603	-0.0400632	0.0695551	0.197223	-0.0201985	-0.119355	-0.0151198
NECTIN1	black	black	0.119316	0.10546	0.0520118	0.0441536	0.0929813	0.118935	-0.0052381	0.163475	0.15912	-0.0568371	0.0212648	0.208731	-0.00624799	-0.122753	0.014119
TRAF4	black	black	0.14266	0.124374	0.0428497	0.0413692	0.133935	0.163116	-0.0748919	0.17087	0.223052	-0.0775488	0.114138	0.319516	0.0290574	-0.150523	0.0257848
MAST4	black	black	0.127938	0.0846321	0.11961	0.0903164	-0.00926593	0.204361	-0.114148	0.114846	0.197192	-0.0676205	-0.0187595	0.328485	0.00636319	-0.146218	0.000690353
A4GALT	black	black	0.125276	0.136486	-0.0489615	-0.033179	0.236532	0.0416913	-0.0472244	0.168125	0.219401	-0.137435	0.201272	0.243499	-0.04947	-0.13071	0.0153145
BZW2	black	black	0.194029	0.153985	0.139484	0.127369	0.0406432	0.207895	0.0010924	0.107381	0.15518	-0.0381953	-0.0565693	0.174323	0.0172848	-0.0499658	0.0964513
UBE2D3	black	black	0.201772	0.144759	0.0988448	0.116687	0.104914	0.213743	0.0150545	0.19853	0.206926	-0.0421789	0.0346015	0.281191	0.0574206	-0.102874	0.0740607
SULT2B1	black	black	0.0142508	0.039436	-0.0639163	-0.10213	0.162863	0.0808858	-0.0725337	0.215007	0.236966	-0.169276	0.122105	0.361343	-0.0680243	-0.224677	-0.127586
MXD1	black	black	0.040387	0.0624352	-0.0255915	-0.100496	0.168675	0.00359007	-0.115982	0.167496	0.255287	-0.129503	0.184536	0.381222	-0.078069	-0.188273	-0.0343583
XPO6	black	black	0.0377313	0.0239274	0.0445762	0.0351383	-0.0272185	0.111037	-0.0469602	0.0542176	0.0828561	-0.0444409	-0.0227305	0.16346	0.0125648	-0.086737	-0.0332513
CEBPG	black	black	0.113175	0.0786515	0.095219	0.0513507	0.0242355	0.114391	-0.00122931	0.0796269	0.115474	-0.0177302	-0.0306199	0.145036	-0.00862369	-0.0823753	0.0308202
TTC9	black	black	0.0606464	0.0503302	-0.0316551	-0.0247343	0.133454	0.0465451	-0.0725181	0.102963	0.143296	-0.0833191	0.156169	0.230842	0.00431667	-0.0960326	-0.0285644
PBDC1	black	black	0.161866	0.11305	0.149633	0.102152	0.0158445	0.212448	-0.0183932	0.114371	0.183591	-0.046408	-0.0824735	0.241033	-0.0051935	-0.12059	0.0248069
PTAFR	black	black	0.0400747	-0.00982186	0.0111958	0.0140556	-0.00235767	0.12587	-0.0195289	0.0879435	0.0911896	-0.0693883	0.0274367	0.220544	0.0161094	-0.083513	-0.0651476
ZFAND5	black	black	0.0800271	0.0300274	-0.0758469	0.080231	0.0879297	0.164034	-0.0101275	0.151993	0.128179	-0.0897731	0.193683	0.277201	0.136032	-0.0200043	0.0288624
ENSMFAG00000044185	black	black	0.209914	0.222489	0.0945059	-0.0296636	0.227509	0.252314	-0.192716	0.302691	0.472892	-0.215542	0.0983665	0.579281	-0.0983849	-0.401419	-0.042427
TRIB1	black	black	0.0468568	0.0206236	-0.0638364	0.0281062	0.0809894	0.0886371	-0.0437695	0.123293	0.120071	-0.0857572	0.158129	0.234458	0.0715116	-0.0703256	-0.0103601
MED15	black	black	0.0788993	0.0506869	0.0555043	0.0498639	0.0223341	0.0899887	-0.00944077	0.0628862	0.0863542	-0.000379038	0.00101296	0.134602	0.0154842	-0.0537777	0.019498
POMP	black	black	0.212839	0.149104	0.0726506	0.0972157	0.191653	0.189776	0.0914783	0.258234	0.200324	-0.0169083	0.0517983	0.240395	0.0458698	-0.111021	0.050355
TMPRSS2	black	black	-0.0295605	-0.0294407	-0.120635	-0.0805729	0.0812839	0.0292837	-0.137366	0.090448	0.131525	-0.119892	0.273402	0.302847	0.0321772	-0.0921931	-0.0781061
PSMD7	black	black	0.185828	0.093014	0.138703	0.10545	0.0414454	0.201735	0.0697826	0.152572	0.117705	0.041286	-0.0650821	0.163436	0.0309719	-0.0843176	0.033388
DIAPH1	black	black	0.0929473	0.0803522	0.0186414	0.0243394	0.106477	0.0773253	-0.0777411	0.11519	0.149414	-0.0466202	0.123787	0.21527	0.00893299	-0.0867058	0.0202531
DCUN1D5	black	black	0.155925	0.0665876	0.0868122	0.114895	0.0355986	0.213345	0.0916529	0.148124	0.0984637	0.00513141	-0.0325542	0.175794	0.0651645	-0.0744964	-0.00531496
CHD7	black	black	0.107063	0.0626964	0.0734984	0.0795389	0.031374	0.140456	-0.0384288	0.0761069	0.0950966	-0.00900928	-0.00562027	0.144931	0.0316173	-0.0645851	0.0218657
SERPINB1	black	black	0.0697925	0.0231707	-0.209296	-0.113632	0.305005	0.236254	-0.109731	0.410007	0.390598	-0.376547	0.375007	0.658251	-0.0135679	-0.362794	-0.23956
SLMAP	black	black	0.124463	0.0873224	0.0726683	0.0563317	0.0639657	0.148756	-0.0749185	0.114862	0.165388	-0.0534674	0.0582303	0.252358	0.0194012	-0.120614	0.00308505
ENSMFAG00000040728	black	black	0.163329	0.100295	-0.0138688	0.0692367	0.178247	0.175444	0.087939	0.232289	0.161417	-0.0636274	0.114496	0.222795	0.071436	-0.0722904	0.0193533
FAM49B	black	black	0.127934	0.0980255	0.0199545	0.0547997	0.112712	0.114326	-0.00177037	0.138087	0.150459	-0.0598252	0.0755012	0.205125	0.0219177	-0.0679773	0.0386471
SERPINB5	black	black	0.151853	0.0667318	0.150311	0.0358084	0.135443	0.284294	0.00585209	0.334539	0.265066	-0.00335219	0.0359499	0.46007	0.0490503	-0.347659	-0.115344
LRRC8A	black	black	0.0769702	0.0235123	-0.00831907	0.046575	0.0613191	0.19089	-0.0159271	0.183341	0.141313	-0.0784294	0.0803725	0.289753	0.0667607	-0.118084	-0.0635891
FDX1	black	black	0.138994	0.0891225	0.0316503	0.0577429	0.077375	0.152248	0.0333008	0.141674	0.151771	-0.0681941	0.0128811	0.189114	0.0118287	-0.0572778	0.0117986
PCBP1	black	black	0.215182	0.220651	0.108149	0.0418032	0.19125	0.119144	-0.0426616	0.181915	0.281629	-0.0813492	0.0729026	0.288436	-0.0443997	-0.148198	0.121629
PPP4R1	black	black	0.130771	0.106253	0.105292	0.0469318	0.0655223	0.154602	-0.0967616	0.14366	0.212102	-0.0545002	0.0217707	0.315567	-0.0214571	-0.17015	0.0071801
SFN	black	black	0.197948	0.073021	0.138029	0.135984	0.0785389	0.471121	0.0641669	0.395305	0.294967	-0.135346	-0.0623148	0.503141	0.103369	-0.305584	-0.116286
SELENOK	black	black	0.195973	0.188259	0.0682033	0.0701351	0.164515	0.199838	-0.0596009	0.181273	0.270209	-0.117948	0.0819298	0.32566	0.0235984	-0.135533	0.070197
PEA15	black	black	0.068483	0.08493	-0.0622079	-0.0281876	0.168632	0.0741157	-0.0921673	0.145839	0.192848	-0.130017	0.175913	0.273121	-0.00167477	-0.128555	-0.0236039
TXNRD1	black	black	0.0140287	-0.0482933	0.0115771	0.0414275	-0.0361648	0.153802	-0.0830908	0.0759183	0.0750027	-0.0434437	0.0917356	0.26246	0.0755554	-0.0876712	-0.0719315
CSNK1D	black	black	0.136556	0.120572	0.0393315	0.0735647	0.0930256	0.122968	-0.0249723	0.108571	0.148873	-0.0583432	0.0483068	0.181049	0.0207449	-0.0552089	0.06774
DPH3	black	black	0.0899043	0.0690676	0.0323035	0.0335406	0.0551245	0.115507	-0.00673167	0.0985946	0.113537	-0.0523497	0.0141727	0.150699	0.015197	-0.0755598	0.00104935
APOBEC3A	black	black	0.0666268	0.114554	-0.17759	-0.225797	0.37358	0.0813473	-0.304619	0.329995	0.520504	-0.391509	0.485714	0.726206	-0.138164	-0.443703	-0.162141
TGFA	black	black	-0.00301013	-0.0175013	-0.0356668	-0.0555027	0.0757432	0.043392	-0.0922433	0.110907	0.128181	-0.0436844	0.120571	0.254761	-0.00334846	-0.129518	-0.0866412
SERPINB8	black	black	0.0420746	-0.0109828	-0.035678	0.0315306	0.0695189	0.120057	0.0115075	0.127513	0.06508	-0.0359415	0.0949945	0.171399	0.0735832	-0.0439958	-0.0572524
TBCA	black	black	0.177016	0.110343	0.0583451	0.0736178	0.177719	0.176169	0.0791325	0.241275	0.172961	-0.0220919	0.0541083	0.223945	0.0429065	-0.132231	0.00590577
BAK1	black	black	0.0756885	0.0265938	0.0235742	0.0536304	0.000151148	0.150428	0.00982017	0.0825978	0.0779808	-0.0358462	0.00128461	0.15496	0.0468495	-0.0612081	-0.0229268
R3HDM4	black	black	0.126301	0.113356	0.00296672	0.0179781	0.142073	0.102442	-0.0533802	0.140059	0.188915	-0.111296	0.126513	0.237064	0.013197	-0.109309	0.0331702
ENSMFAG00000037689	black	black	0.125734	0.135732	0.0170137	0.0251069	0.134982	0.153214	-0.129689	0.170517	0.259609	-0.142393	0.117304	0.345017	-0.0109501	-0.161689	0.0240222
NDRG1	black	black	0.0402313	-0.0756663	-0.0374483	0.0524592	0.0645157	0.201546	0.0404846	0.230961	0.0752327	-0.0194215	0.131305	0.307762	0.128661	-0.0954493	-0.121867
BCL10	black	black	0.0773895	0.011522	-0.0348324	0.0367412	0.0398496	0.167129	-0.0377385	0.149376	0.157739	-0.116672	0.0989393	0.324027	0.0521401	-0.0828317	-0.0531478
GLS	black	black	0.11857	0.0996423	0.126126	0.0771882	-0.0060572	0.1817	-0.0773153	0.0896836	0.174892	-0.0263316	-0.102314	0.233023	-0.00620592	-0.13597	0.000756084
DUSP5	black	black	-0.00531348	-0.00809508	-0.0339948	-0.0450366	0.0559847	0.0717728	-0.112779	0.116513	0.148267	-0.0832928	0.144997	0.305133	0.0175914	-0.141528	-0.0771089
TNFRSF10A	black	black	0.0973968	0.0536559	0.0833636	0.040006	0.0219951	0.162544	-0.082993	0.110071	0.164514	-0.0477963	0.0367786	0.287887	0.015913	-0.136092	-0.0162812
ENSMFAG00000044835	black	black	0.0805868	0.0797113	0.017774	0.0570892	0.0125439	0.153664	-0.101254	0.0774253	0.207504	-0.155027	0.0546512	0.329214	0.0275972	-0.0509554	0.0640093
PRELID1	black	black	0.170267	0.165653	0.00772811	-0.000205935	0.228174	0.14504	-0.0139111	0.250694	0.272456	-0.138989	0.120496	0.322987	-0.011568	-0.184728	0.0310576
PSME3	black	black	0.103121	0.070931	0.0414955	0.0468146	0.0545938	0.136418	-0.00133974	0.10752	0.114463	-0.0502391	0.000608389	0.161242	0.0151861	-0.0903501	0.0036406
RAB5IF	black	black	0.163608	0.103496	-0.0105889	0.0470085	0.173175	0.186904	0.0220382	0.248208	0.220809	-0.137183	0.145444	0.331728	0.0159227	-0.140073	-0.0116407
UCHL3	black	black	0.152853	0.0807216	0.058288	0.0899616	0.121614	0.195273	0.090353	0.211755	0.12069	-0.0165275	0.00868332	0.178886	0.0561454	-0.103108	-0.00232606
PTPN1	black	black	0.0846017	0.0105873	0.0193545	0.0865378	0.00938863	0.156787	0.00622059	0.0941543	0.0795488	-0.0303397	0.00453635	0.18672	0.0622221	-0.0482027	-0.0390399
RAB43	black	black	0.0655951	0.0200329	0.0360262	0.0439534	0.0106246	0.081356	-0.0225668	0.0511969	0.0580894	-0.00076135	0.0366502	0.119364	0.0253525	-0.0411062	-0.00259266
ENSMFAG00000030085	black	black	0.113818	0.0977719	0.0412256	0.0497833	0.067482	0.110649	-0.0067225	0.100009	0.137033	-0.0650117	0.00410156	0.149772	-0.0122619	-0.0739137	0.0321309
RREB1	black	black	0.116258	0.0854848	0.074011	0.0488954	0.04866	0.109199	-0.026319	0.0907506	0.138166	-0.0479611	0.00118467	0.170732	-0.0176965	-0.0881985	0.0323275
PRRG4	black	black	0.0590762	0.0231041	-0.0796115	0.0207033	0.117939	0.103515	-0.0337844	0.163989	0.161412	-0.11123	0.163532	0.311785	0.0364598	-0.0701324	-0.0377891
HM13	black	black	0.126892	0.121927	0.0465385	0.0245926	0.118453	0.124294	-0.0451075	0.135429	0.189777	-0.0700172	0.0321147	0.217281	-0.0180295	-0.125553	0.0199068
YWHAG	black	black	0.155957	0.116693	0.136377	0.0897405	0.0593181	0.14722	-0.0272672	0.13931	0.169277	0.00457055	-0.0244858	0.217947	0.0154049	-0.111515	0.0542123
STK17A	black	black	0.143269	0.0670991	0.123901	0.0919401	0.0434836	0.230868	0.00931006	0.18176	0.156129	0.0147385	-0.0463507	0.262952	0.0496845	-0.155066	-0.0450001
ENSMFAG00000031571	black	black	0.0655958	0.056129	-0.0395067	-0.00277525	0.108001	0.099195	-0.0647738	0.122622	0.15267	-0.115742	0.119317	0.236745	0.01234	-0.10444	-0.0319973
VMP1	black	black	0.0647447	-0.0185436	-0.0621742	0.0558243	0.100216	0.137582	0.00896254	0.169845	0.0959195	-0.0422996	0.155148	0.254631	0.104972	-0.0677612	-0.058314
PHLDA2	black	black	0.164283	0.202278	0.0267427	-0.0362769	0.290615	0.241855	-0.128728	0.36992	0.459481	-0.268993	0.186213	0.593215	-0.0636839	-0.399421	-0.0325232
ENSMFAG00000046351	black	black	0.113312	0.0605892	0.0327586	0.0554482	0.0585888	0.163343	0.0274501	0.135433	0.120749	-0.055309	-0.00497837	0.185874	0.0306423	-0.0915579	-0.0170345
EIF4G1	black	black	0.187638	0.156652	0.100304	0.105965	0.141425	0.1501	-0.0344354	0.168454	0.196128	-0.0122841	0.0455411	0.221788	0.0200755	-0.105197	0.0676699
PNPLA8	black	black	0.0670242	0.0229762	-0.0474681	0.045301	0.0526409	0.13396	-0.04533	0.102589	0.114109	-0.0847044	0.12136	0.230643	0.0627254	-0.0502792	-0.0243141
UBAP1	black	black	0.118394	0.133243	0.0413411	0.0250049	0.106848	0.0836538	-0.0545474	0.108234	0.185886	-0.0923361	0.0494865	0.210489	-0.0185327	-0.0885515	0.077173
KDM7A	black	black	0.0660101	0.0508055	0.0214945	0.0119663	0.0511966	0.108056	-0.0832777	0.0941788	0.160505	-0.0814232	0.0600328	0.241225	-0.0192932	-0.115113	-0.0237638
PHF5A	black	black	0.170897	0.147518	0.0336908	0.0717404	0.128603	0.200605	0.0087723	0.201338	0.216082	-0.116747	0.0400805	0.267488	0.0202029	-0.117108	0.0448771
PSMD12	black	black	0.13177	0.0210556	0.0401555	0.107281	0.0192513	0.252989	0.0368752	0.165944	0.119467	-0.0462237	0.0085372	0.262912	0.0842454	-0.0882923	-0.0503524
PHC2	black	black	0.0729358	0.0240483	0.0394782	0.0643891	-0.00866072	0.154377	-0.0362476	0.0844845	0.0760002	-0.0191613	0.0174842	0.16794	0.0665768	-0.068941	-0.00997235
TUBB6	black	black	0.148175	0.0901828	-0.00509902	0.0755115	0.149087	0.248104	0.00619164	0.258022	0.195672	-0.117228	0.0896216	0.311866	0.0790971	-0.146345	-0.0341235
SLC28A3	black	black	0.0729321	0.0383351	0.0592229	0.0184308	0.0447149	0.118498	-0.0634915	0.121699	0.142284	-0.0569845	0.0570707	0.265659	-0.0253152	-0.124227	-0.0485995
RAB7A	black	black	0.154168	0.126099	0.0456672	0.0786087	0.122215	0.158887	-0.0102664	0.160017	0.184998	-0.071308	0.0873549	0.245238	0.0498118	-0.0920146	0.0543383
TMEM51	black	black	0.0387274	0.0169892	-0.00348209	-0.00233864	0.0634203	0.0802471	0.000891007	0.118167	0.100455	-0.0549047	0.0316294	0.17059	-0.020724	-0.0917576	-0.0550293
CAB39	black	black	0.171802	0.166787	0.107189	0.0361722	0.159208	0.126968	-0.0720554	0.160668	0.24822	-0.0380776	0.0700626	0.286679	-0.0142192	-0.163416	0.0515386
RELA	black	black	0.0971488	0.0911005	0.0459655	0.038086	0.0485508	0.106795	-0.0342771	0.080363	0.134753	-0.0524744	0.0120769	0.167947	0.000219224	-0.080058	0.0397155
MRPL15	black	black	0.202859	0.139072	0.0939133	0.110026	0.131428	0.220496	0.100011	0.224656	0.160594	-0.0315037	-0.028771	0.184201	0.0325913	-0.107083	0.0312859
BCL2L1	black	black	0.0995694	0.0901731	0.0379	0.0103423	0.106028	0.129204	-0.0589366	0.142108	0.185024	-0.0837183	0.0514325	0.250335	-0.00390582	-0.147901	-0.0247053
SMAGP	black	black	0.154284	0.180208	-0.0042004	-0.0384418	0.227733	0.141477	-0.142351	0.216037	0.355086	-0.206008	0.172821	0.433997	-0.076422	-0.239415	-0.00374398
ISG20	black	black	0.0449026	-0.031716	-0.0582096	-0.0257601	0.0449015	0.227334	-0.089447	0.213524	0.224351	-0.186901	0.152748	0.478816	0.0300507	-0.208095	-0.165684
DSG3	black	black	0.0742688	0.123705	-0.10031	-0.0730453	0.273247	0.10725	-0.102801	0.327659	0.355265	-0.274698	0.233215	0.48869	-0.0686537	-0.30177	-0.0578007
CAPN2	black	black	0.187921	0.162438	0.103937	0.0212711	0.222934	0.161719	-0.0440468	0.278801	0.278489	-0.00317425	0.110532	0.364416	0.0172874	-0.241186	0.0215943
ENSMFAG00000014991	black	black	0.0512088	-0.0171509	-0.00423057	0.0467644	0.0220491	0.171708	0.00652588	0.119216	0.083806	-0.0577227	0.0441608	0.224705	0.0806648	-0.0902611	-0.0793635
LRRFIP1	black	black	0.176429	0.1471	0.107968	0.0847081	0.134998	0.136861	-0.0505695	0.173729	0.217607	-0.025111	0.0806247	0.279699	-0.00568732	-0.131917	0.0754612
ENSMFAG00000032872	black	black	0.21314	0.248954	-0.0257305	-0.0601766	0.392561	0.113832	-0.126469	0.336839	0.439874	-0.240766	0.322935	0.507062	-0.0623582	-0.297539	0.0341374
CYCS	black	black	0.247465	0.181512	0.124179	0.140149	0.0997362	0.327779	0.0442499	0.242795	0.245639	-0.117115	-0.065622	0.303248	0.0574005	-0.137797	0.0745932
AUP1	black	black	0.16479	0.108941	0.0569778	0.0981371	0.075245	0.165701	0.0428766	0.135077	0.1337	-0.0427055	0.00885569	0.164465	0.0414826	-0.0369328	0.0640261
KDELR2	black	black	0.141145	0.0791911	0.0319436	0.0446435	0.142215	0.147897	0.0101345	0.179227	0.149675	-0.0015831	0.094813	0.231614	0.0570161	-0.113038	-0.00701004
YWHAZ	black	black	0.199924	0.18329	0.0561038	0.0608867	0.228058	0.185691	-0.0587282	0.278757	0.302082	-0.101804	0.140501	0.379443	0.00666515	-0.213084	0.062977
ABCF1	black	black	0.127163	0.0788165	0.0562289	0.106234	0.0541025	0.159784	-0.00208905	0.103629	0.106813	-0.0212473	0.00690444	0.148282	0.0402968	-0.0598172	0.0249605
SLC25A5	black	black	0.328716	0.264252	0.0949875	0.14573	0.299648	0.327229	0.0705114	0.38626	0.348014	-0.137124	0.136113	0.400875	0.0670521	-0.199846	0.108639
IL4R	black	black	0.101594	0.039521	-0.00157979	0.0283459	0.0843397	0.200636	-0.0670558	0.176613	0.189726	-0.104021	0.0820809	0.336933	0.0281516	-0.17511	-0.0806182
ANXA1	black	black	0.118442	0.0524858	-0.105856	0.0425083	0.227257	0.271707	-0.0832723	0.35622	0.288007	-0.225487	0.322507	0.537589	0.102749	-0.201658	-0.0565569
RCOR1	black	black	0.107532	0.0967996	0.0828381	0.0401334	0.0541111	0.134709	-0.0746355	0.119399	0.198106	-0.0784504	0.00802554	0.269036	-0.0335019	-0.14961	0.0101322
HMOX1	black	black	-0.0610454	-0.105969	0.0399759	-0.00707695	-0.0797294	0.116251	-0.0553173	0.0520855	0.0378849	-0.00449707	0.0657832	0.259311	0.0580183	-0.113265	-0.106276
ENSMFAG00000034637	black	black	-0.0300389	-0.0797664	-0.172719	-0.0449572	0.0925062	0.0772956	-0.0752514	0.124826	0.0826911	-0.132997	0.306144	0.291679	0.0828979	-0.0544222	-0.124989
DIP2B	black	black	0.0659766	0.0398303	0.0334554	0.0491408	0.0149122	0.115567	-0.0655479	0.0802694	0.102342	-0.0407715	0.0228437	0.193499	0.024784	-0.0622557	-0.0014125
ENSMFAG00000040050	black	black	0.179198	0.163603	0.0368317	0.000402449	0.218187	0.112866	-0.0352368	0.22393	0.265284	-0.101766	0.135923	0.318518	-0.0339518	-0.168182	0.0411338
GSPT1	black	black	0.192772	0.151864	0.151358	0.121804	0.072368	0.222405	-0.0126843	0.155584	0.18445	-0.0206199	-0.0414067	0.232149	0.0383886	-0.1232	0.076731
MAP2K1	black	black	0.0720041	0.0382362	0.0141015	0.0269169	0.0534326	0.101712	-0.0130495	0.107408	0.11333	-0.0473176	0.0336576	0.184552	0.019842	-0.085989	-0.0282681
RESF1	black	black	0.0675163	0.0454867	0.0471329	0.0209098	0.0405764	0.0646865	-0.035607	0.0874424	0.113845	-0.0294284	0.0495549	0.175397	-0.0223324	-0.082608	0.0124219
MAP4K5	black	black	0.126189	0.0931415	0.117312	0.062839	0.0455388	0.105336	-0.0255681	0.104241	0.158973	-0.0136307	-0.0287528	0.208016	-0.0337079	-0.114039	0.0348938
MCU	black	black	0.0500961	0.0161299	0.0369199	0.0323119	-0.00859083	0.0919385	-0.0254549	0.0504687	0.0793378	-0.0310188	-0.0179392	0.14294	0.0144393	-0.0599651	-0.0294269
MVP	black	black	0.0885575	0.0596283	-0.0231094	-0.0245588	0.184098	0.0363263	-0.0292162	0.172818	0.148264	-0.0546655	0.161898	0.197179	-0.0137072	-0.12426	-0.0274555
ACTN4	black	black	0.138841	0.133407	0.0767445	0.024893	0.165934	0.112302	-0.114174	0.200116	0.252727	-0.0322642	0.124318	0.337714	-0.00213892	-0.192722	0.03013
NOL7	black	black	0.151768	0.0832134	0.0276419	0.0892709	0.0614706	0.170086	0.0591943	0.129948	0.115199	-0.0574926	0.0197358	0.164357	0.0586801	-0.0305802	0.0421265
IFNGR2	black	black	0.129419	0.0785317	0.0628205	0.0335805	0.0570508	0.132873	-0.0507275	0.0985205	0.15528	-0.0312928	0.108419	0.25479	0.0496537	-0.0842633	0.0356755
UGCG	black	black	0.00279077	-0.0519614	-0.0759853	-0.0581989	0.0822629	0.147897	-0.10814	0.163536	0.185716	-0.143372	0.215804	0.433266	0.0179434	-0.201251	-0.163633
EAF1	black	black	0.101305	0.0680842	0.0676579	0.0412891	0.0520294	0.11148	-0.0334252	0.107288	0.129248	-0.0158393	0.0157606	0.196276	-0.000215993	-0.106411	0.00762214
ATP5MD	black	black	0.228413	0.205607	0.116985	0.0750131	0.217889	0.15928	0.0373605	0.245253	0.233287	-0.0232892	0.0525721	0.225589	0.00878033	-0.141378	0.0986512
TPM3	black	black	0.13574	0.0736015	0.00597091	0.0844819	0.119449	0.147493	0.0236606	0.168002	0.130314	-0.0313301	0.0585765	0.191925	0.0517622	-0.0719095	-0.0084464
EIF3D	black	black	0.153753	0.0902517	0.0798483	0.0976367	0.05387	0.181194	0.0644861	0.133867	0.12023	-0.0183652	-0.0223616	0.17122	0.0367371	-0.0691722	0.0234187
ST14	black	black	0.0938338	0.142309	-0.0446454	-0.0901652	0.242389	0.0591228	-0.214001	0.223401	0.366013	-0.229966	0.28857	0.49307	-0.108951	-0.26087	-0.0225976
NABP1	black	black	0.0586219	0.0577446	-0.122018	0.00186948	0.159936	0.132159	-0.0977961	0.17824	0.212088	-0.208642	0.233565	0.352459	0.0311497	-0.0960124	-0.0341098
CLIC1	black	black	0.199796	0.105987	0.0252238	0.0617795	0.244936	0.220252	0.0786224	0.332693	0.235837	-0.0505802	0.163892	0.366214	0.0637003	-0.166244	-0.0265386
CAST	black	black	0.170538	0.120759	-0.0260482	0.0554067	0.232409	0.181274	-0.0432768	0.29277	0.269828	-0.051502	0.188724	0.390255	0.0791551	-0.193674	-0.00668803
NAA50	black	black	0.177586	0.124094	0.114783	0.114104	0.0573159	0.179164	0.00593282	0.127545	0.1419	-0.00345843	-0.0304206	0.172215	0.0363092	-0.0790838	0.060819
PHLDB2	black	black	0.079381	-0.0205334	0.175854	0.0953583	-0.0969683	0.194027	-0.0131666	0.0884247	0.0611188	0.0805541	-0.107663	0.193109	0.0482098	-0.119692	-0.047189
HK2	black	black	0.108991	0.106941	0.022395	0.053142	0.0952487	0.165756	-0.0743228	0.147529	0.200425	-0.118559	0.0776945	0.281174	0.0240205	-0.131197	0.0160536
RPS6KA3	black	black	0.0739959	0.0242616	0.0501442	0.054668	0.020007	0.127004	-0.0162585	0.0964017	0.0849936	-0.022497	0.0427428	0.196663	0.0361563	-0.0578204	-0.0124045
MAPK6	black	black	0.0779737	0.0238023	0.0650715	0.0456569	0.0306862	0.114401	-0.00955074	0.109016	0.0882182	0.0158374	0.0408489	0.181124	0.0549309	-0.0745918	-0.00944314
ZNF207	black	black	0.141602	0.113698	0.0800667	0.0912267	0.0865782	0.139016	-0.0193233	0.130619	0.145994	-0.0217195	0.0383862	0.190076	0.0427128	-0.0795655	0.0534586
RNH1	black	black	0.282717	0.278692	0.173482	0.113942	0.25965	0.246607	0.0457335	0.325717	0.332909	-0.0822368	-0.00804098	0.32511	-0.00559416	-0.207943	0.101131
RUBCN	black	black	0.0273917	0.0351156	-0.00161355	-0.00814224	0.0444673	0.0592865	-0.0965257	0.0674476	0.133744	-0.0693825	0.0775216	0.2198	-0.00613499	-0.0936888	-0.0210741
GPR87	black	black	0.0791804	0.0760505	0.0187989	-0.0150882	0.109605	0.07163	-0.0545333	0.124584	0.172486	-0.0570515	0.0835472	0.237813	-0.0252234	-0.125862	-0.00648021
MRPS30	black	black	0.103431	0.0599895	0.0646752	0.0625901	0.0318121	0.119311	0.0213497	0.0865162	0.0893527	-0.0197039	-0.0157146	0.141116	0.0136335	-0.0478852	0.0173652
RRAS2	black	black	0.113144	0.0733888	0.14794	0.0464787	0.0348949	0.111477	-0.0376242	0.0932215	0.140602	0.0331013	-0.0372188	0.195986	-0.0216204	-0.126554	0.00831738
RBM47	black	black	0.0605598	0.0502017	-0.0762893	-0.0583793	0.165138	0.0900847	-0.168658	0.170328	0.258663	-0.175199	0.287691	0.434657	-0.0209063	-0.186241	-0.0713013
ACTG1	black	black	0.175347	0.0685628	0.0475834	0.0198215	0.229928	0.25785	0.0825124	0.40078	0.296692	-0.017362	0.128026	0.465742	0.0551189	-0.291774	-0.0765919
TARS1	black	black	0.0945776	0.06836	0.0694844	0.0556202	0.0322159	0.111294	-0.0193715	0.0812213	0.10269	-0.0154312	-0.0179783	0.137496	-0.0147208	-0.0914533	0.00356408
ARFGAP3	black	black	0.161337	0.121447	0.114024	0.073421	0.0859704	0.10593	0.00646907	0.108595	0.155598	0.00704049	0.0101641	0.179693	-0.00838395	-0.0757781	0.0838832
PTPRE	black	black	0.065024	0.0322081	0.112142	0.0511139	-0.00718515	0.0996827	-0.0112501	0.0638768	0.0707019	0.0169796	-0.0628304	0.119776	-0.0189499	-0.0872887	-0.00688234
VASP	black	black	0.0761409	0.0255595	0.134533	0.051261	-0.00610767	0.142865	-0.0311644	0.0998536	0.0962763	0.0533624	-0.0384124	0.182882	0.0313834	-0.133807	-0.00804789
MYO1E	black	black	0.113026	0.0830756	0.114026	0.0602721	0.034337	0.144898	-0.0540055	0.120272	0.171042	-0.020142	-0.00130835	0.262854	0.000208611	-0.132646	0.00578352
ENSMFAG00000046072	black	black	0.0709544	0.0411818	0.016136	0.00899345	0.0583617	0.0729427	0.0157901	0.109499	0.102374	-0.0238864	0.0244616	0.163787	-0.00672621	-0.0737595	-0.00774053
BTF3L4	black	black	0.176179	0.137458	0.0706808	0.103956	0.0736052	0.177794	0.0262959	0.134166	0.155753	-0.0676524	-0.0114233	0.176083	0.0373817	-0.0590308	0.0794941
EPHA2	black	black	0.133468	0.176147	-0.0424658	0.0230524	0.225724	0.134754	-0.210158	0.208416	0.349201	-0.235628	0.268871	0.471116	-0.00435344	-0.198181	0.0580519
EZR	black	black	0.211943	0.227577	0.0545538	0.0579648	0.226843	0.229122	-0.237471	0.27065	0.43135	-0.21452	0.211055	0.554022	-0.0102305	-0.293772	0.0787788
JAGN1	black	black	0.133255	0.121555	0.0781525	0.057078	0.0689377	0.105582	-0.0358951	0.0938207	0.164855	-0.0611766	-0.00978809	0.174726	-0.0375372	-0.0792804	0.055085
RAB10	black	black	0.199466	0.188301	0.0820216	0.0256418	0.229176	0.139328	0.00978316	0.271662	0.277775	-0.0870686	0.0771057	0.320968	-0.0520963	-0.204834	0.03735
B4GALT5	black	black	0.0926668	0.114774	-0.0565265	-0.0581453	0.175395	0.0709832	-0.189708	0.167756	0.322615	-0.195933	0.257792	0.462215	-0.0640774	-0.19681	-0.0028373
SDC4	black	black	0.152445	0.177879	0.152785	0.0515697	0.0795111	0.135924	-0.154332	0.108968	0.245757	-0.0611854	-0.00538094	0.262922	-0.0435318	-0.202015	0.0756873
RNF213	black	black	0.109272	0.113669	0.0053454	-0.0122458	0.155838	0.107625	-0.151344	0.163992	0.301195	-0.156921	0.163879	0.428221	-0.0497241	-0.190017	-0.00688673
PPP2CB	black	black	0.128999	0.095419	0.0474074	0.059897	0.0848695	0.145096	0.00548459	0.148354	0.167767	-0.0522245	0.0189479	0.23232	0.00497584	-0.121129	0.001061
UFM1	black	black	0.128109	0.0898863	0.0223194	0.054395	0.101359	0.123822	0.00518819	0.135512	0.145151	-0.0532013	0.0535779	0.189856	0.0233875	-0.0837738	0.00625349
ARPP19	black	black	0.164034	0.142774	0.0996123	0.0863537	0.0879418	0.138059	-0.00808141	0.123147	0.17325	-0.0388874	-0.0069977	0.186063	-0.000116841	-0.0930636	0.086737
MAPKAPK2	black	black	0.0520071	0.030544	-0.00659004	0.0189838	0.0447295	0.0492987	-0.0356977	0.0702984	0.0824032	-0.0474335	0.0817815	0.147843	0.0168432	-0.0394158	0.01518
ENSMFAG00000026668	black	black	0.0579167	0.0308775	-0.0232596	0.0230772	0.0219208	0.135347	-0.0753449	0.080808	0.128265	-0.118512	0.0472399	0.232548	0.0121762	-0.0885905	-0.0411347
GJB4	black	black	0.206955	0.206203	0.200178	0.0189447	0.130061	0.281557	-0.12618	0.257647	0.390527	-0.134772	-0.0298149	0.485666	-0.0815124	-0.359002	-0.024451
VPS4B	black	black	0.169976	0.197327	0.0752649	0.00724419	0.209513	0.106651	-0.0990041	0.206717	0.312811	-0.122685	0.101673	0.357302	-0.0691873	-0.196063	0.0690391
MAPK1IP1L	black	black	0.108025	0.0791589	0.046185	0.0367822	0.0656267	0.106172	0.0115633	0.111238	0.122769	-0.0138914	0.02367	0.17681	0.0220697	-0.0614385	0.0228591
MARK3	black	black	0.138124	0.0938013	0.130544	0.0850728	0.0447618	0.142466	-0.00195417	0.123959	0.129923	0.0195623	-0.0450768	0.172986	0.0164425	-0.0942429	0.0369314
ZDHHC5	black	black	0.0975508	0.101709	0.0807529	0.0296068	0.0580195	0.0823959	-0.0535786	0.0829381	0.14141	-0.0361343	-0.00901167	0.158838	-0.0120018	-0.0987395	0.0364084
RNF19B	black	black	0.115408	0.0995968	0.0920955	0.0607084	0.051938	0.107949	-0.0418067	0.0825569	0.153349	-0.0377938	0.0178543	0.2106	0.00363564	-0.0681071	0.0687892
VPS37B	black	black	0.0641033	0.0616598	0.0214872	0.000731223	0.0874656	0.0703564	-0.0695329	0.109193	0.14981	-0.056793	0.0916532	0.23095	-0.0126829	-0.115619	-0.010982
NOP10	black	black	0.191907	0.173708	0.0546232	0.0237505	0.258024	0.112343	0.0616611	0.272541	0.239712	-0.0505901	0.0638631	0.244242	-0.0262977	-0.169088	0.0289287
NT5C3A	black	black	0.101703	0.103399	0.0644731	0.0100071	0.0788109	0.0781567	-0.0678236	0.0958589	0.187184	-0.0771778	0.0460681	0.22529	-0.0449413	-0.121778	0.0267062
GPRC5A	black	black	-0.013224	-0.0146249	-0.142048	-0.0939289	0.160798	0.0200053	-0.177475	0.130411	0.192161	-0.128701	0.345748	0.381209	0.030334	-0.146598	-0.0991537
WARS1	black	black	0.101436	0.0866018	0.029821	-0.0116581	0.137589	0.0704676	-0.0463194	0.126796	0.179297	-0.0467839	0.0931283	0.226987	-0.0263679	-0.128294	-0.00211563
C12orf49	black	black	0.126709	0.0842781	0.0488336	0.0645724	0.0786078	0.11653	0.00451175	0.115575	0.115468	-0.0142343	0.0655265	0.170188	0.0395224	-0.0452037	0.0432299
POLR2D	black	black	0.122647	0.0814287	0.035413	0.0746954	0.031471	0.147621	0.0170082	0.0952409	0.107343	-0.0501174	-0.0118521	0.145216	0.0282858	-0.0452945	0.026599
PSME2	black	black	0.215243	0.146945	0.107755	0.099143	0.165559	0.215432	0.0247742	0.231906	0.196522	-0.0270686	0.039833	0.250125	0.0582986	-0.13684	0.0268247
CSNK1A1	black	black	0.213878	0.160055	0.176096	0.120026	0.0952184	0.198889	0.0149914	0.199708	0.198076	0.0183779	-0.0342084	0.24979	0.0264927	-0.136435	0.0775725
ZNFX1	black	black	0.0852481	0.0630001	0.0235282	0.0225191	0.0477589	0.100138	-0.122713	0.0711102	0.167942	-0.0848228	0.100579	0.263314	0.00431074	-0.0969276	0.00311668
SERP1	black	black	0.135631	0.0855969	-0.0497207	0.0440385	0.156524	0.167192	-0.0250225	0.186867	0.206624	-0.128908	0.206702	0.329582	0.0692381	-0.0710076	0.0318571
AKIRIN2	black	black	0.144991	0.169726	0.133394	0.0427653	0.0878462	0.168001	-0.066526	0.156042	0.246964	-0.0937299	-0.0173528	0.29506	-0.0275309	-0.18741	0.0752498
RNF149	black	black	0.12419	0.107577	0.0496874	0.0555216	0.0769249	0.132841	-0.0348341	0.126071	0.156357	-0.0720796	0.0380374	0.222841	0.0067553	-0.085694	0.0396613
STRN3	black	black	0.152543	0.12818	0.168704	0.0758592	0.0289504	0.157959	-0.0615021	0.100156	0.182569	0.0034999	-0.0665854	0.221502	-0.0138052	-0.129221	0.0513942
TMCC3	black	black	-0.0578708	-0.0583778	-0.0669275	-0.0377694	-0.000399741	0.0560147	-0.0426933	0.0672449	0.0659706	-0.0797078	0.074883	0.203278	0.0229659	-0.0906205	-0.0946108
WDR1	black	black	0.180347	0.127759	0.0875726	0.0546969	0.174613	0.188842	-0.0196172	0.235823	0.234473	-0.0151501	0.091407	0.318425	0.0406416	-0.173146	0.0200041
SPAG9	black	black	0.0540622	0.0288644	0.0389281	0.0590066	0.0399243	0.129967	-0.0470152	0.0912383	0.101813	-0.0123089	0.0711866	0.21374	0.0759388	-0.0896542	0.00240803
SRXN1	black	black	0.0442844	0.0395053	-0.0197956	-0.0206339	0.0861697	0.0692397	-0.0525527	0.111492	0.128094	-0.0858182	0.113689	0.217894	0.00198218	-0.0953049	-0.0187419
ST3GAL1	black	black	0.106048	0.0872713	0.150092	0.0198222	0.0384408	0.0816012	-0.0534659	0.0702144	0.143926	0.0279159	-0.0168627	0.182266	-0.0530191	-0.145424	0.0181424
ENSMFAG00000027255	black	black	0.0407375	0.0542385	0.00712974	-0.0798668	0.0832848	0.0448089	-0.127256	0.102144	0.209323	-0.128221	0.0986515	0.311482	-0.0800306	-0.182417	-0.0589806
PTP4A1	black	black	0.113081	0.0515792	-0.101237	-0.00651159	0.152953	0.184037	-0.0917119	0.224436	0.273406	-0.230043	0.261014	0.479886	0.0240359	-0.166995	-0.0731547
CTSL	black	black	0.0719379	-0.0804061	0.161189	0.0708653	-0.129606	0.400367	-0.0179396	0.196006	0.154372	-0.0483872	-0.135061	0.413251	0.0708986	-0.308438	-0.24281
EIF6	black	black	0.202573	0.146946	0.0601744	0.0543056	0.226088	0.230721	0.0526867	0.319226	0.265286	-0.0924817	0.0806915	0.350659	0.0314845	-0.200262	-0.0159342
RASSF5	blue	blue	0.131244	0.187535	0.053289	0.0361084	0.131668	0.0111562	-0.0598869	0.0679516	0.166898	-0.0604954	0.0556011	0.100336	-0.0520329	-0.0526344	0.142396
CLASP1	blue	blue	0.0795424	0.0993987	0.0572723	0.0416162	0.0488017	0.00698985	-0.0423576	0.0246628	0.0726464	0.00882091	0.000226875	0.0401983	-0.0129938	-0.0137611	0.0854344
ALG11	blue	blue	0.0764748	0.0843253	0.0583208	0.0521309	0.0353333	0.0101807	-0.0237143	0.00808539	0.0526306	0.0126261	-0.00172662	0.0127914	-0.00784937	0.00722721	0.0775109
MIF4GD	blue	blue	0.107558	0.167733	0.000985905	0.0105029	0.170208	-0.0339766	-0.0262808	0.0570888	0.126243	-0.0587894	0.11003	0.0433961	-0.0322917	0.00587499	0.153301
ANAPC15	blue	blue	0.11785	0.138186	0.0659996	0.0404238	0.140482	0.0251817	0.0341767	0.105887	0.103969	0.0265201	0.0346851	0.0512219	0.00781677	-0.0464976	0.110745
NLK	blue	blue	0.127765	0.164637	0.113627	0.0763445	0.0568307	0.0697405	-0.0453329	0.0397297	0.12392	-0.00668769	-0.0146105	0.0700579	-0.00980104	-0.0319473	0.148376
MRPL55	blue	blue	0.138754	0.137158	0.0624638	0.0546665	0.136199	0.0432623	0.0477019	0.111672	0.103305	0.0139331	0.0255253	0.0585199	0.000564947	-0.0354552	0.0889396
RASAL2	blue	blue	0.128805	0.189075	0.0775438	0.0445714	0.115893	-0.0014654	-0.043482	0.050645	0.142771	-0.0258736	0.0245418	0.0624187	-0.041679	-0.0349213	0.154369
CREG1	blue	blue	0.140718	0.209399	0.0538461	0.036868	0.138241	-0.00954199	-0.0527245	0.0309574	0.150764	-0.054203	0.0958255	0.0648291	-0.0410803	-0.00157585	0.190984
TMEM184B	blue	blue	0.0942936	0.119902	0.0987736	0.03526	0.0668405	0.0227182	-0.062633	0.020893	0.0897257	0.045617	0.0118447	0.0453444	-0.012595	-0.028598	0.0938485
VAMP4	blue	blue	0.0607019	0.0777705	0.0114566	-0.00319252	0.0816638	-0.00263352	-0.00388906	0.0531883	0.0680398	-0.0265078	0.028371	0.0309828	-0.0354772	-0.0063853	0.0621835
PHF20L1	blue	blue	0.0965593	0.0797754	0.0388849	0.065042	0.0614688	0.0267467	0.0457589	0.0464796	0.0396198	0.0398008	0.0270467	0.0171114	0.0297168	0.0244876	0.0820999
KMT5A	blue	blue	0.133428	0.20733	0.0923483	0.0398675	0.142584	0.0217923	-0.0491006	0.0829838	0.166867	-0.0472923	0.0338209	0.0934191	-0.0451565	-0.0672629	0.149259
ENSMFAG00000039838	blue	blue	0.212381	0.188652	0.144304	0.122868	0.119989	0.0937238	0.0736381	0.128609	0.114686	0.0715983	-0.0040979	0.0488528	0.0380584	0.00225932	0.175178
NDUFAB1	blue	blue	0.261195	0.267525	0.164978	0.120244	0.17835	0.124064	0.0735051	0.174269	0.191781	0.0165565	-0.031823	0.100471	-0.00283607	-0.0520488	0.198413
TPD52L2	blue	blue	0.124265	0.164296	0.0738265	0.0281181	0.128526	0.0416449	-0.00888648	0.088851	0.141997	-0.0268706	0.0139593	0.0913276	-0.0350943	-0.0644145	0.107427
MTMR14	blue	blue	0.0728868	0.0831411	0.038123	0.0438748	0.0465921	0.0292464	-0.0137208	0.0363353	0.0678684	0.00073766	0.0191341	0.0502756	-0.00666292	0.00568805	0.0880416
IFT20	blue	blue	0.105043	0.140537	0.0289914	-0.00263124	0.149257	-0.00735438	0.00911846	0.0853726	0.121186	-0.0179487	0.0707798	0.0745462	-0.0315985	-0.0276524	0.0963683
PINK1	blue	blue	0.152851	0.22247	0.0422004	0.0440315	0.149968	-0.00345415	-0.0410542	0.053794	0.167794	-0.0720611	0.0545426	0.0668815	-0.0346513	-0.0084362	0.184238
PPFIA3	blue	blue	0.0520091	0.113055	0.0129809	-0.0101957	0.112398	0.00444785	-0.0375361	0.0548309	0.129063	-0.0756478	0.0212828	0.0804664	-0.0539327	-0.0763381	0.0458148
BNIP3L	blue	blue	0.217932	0.309369	0.0971979	0.0548412	0.226633	-0.000263556	-0.0437947	0.121158	0.250321	-0.0625468	0.0660876	0.122512	-0.0605354	-0.0480709	0.260625
ESRP1	blue	blue	0.18457	0.271391	0.111806	0.0342797	0.192379	0.0215687	-0.0897429	0.11244	0.25193	-0.0719079	0.0540712	0.158674	-0.0934364	-0.106783	0.198754
TRIM7	blue	blue	0.102861	0.159916	0.0218399	0.0568821	0.0742577	0.0167309	-0.0287083	0.019425	0.0942843	-0.0828345	0.0132565	0.0103346	-0.0163803	0.0384665	0.17121
ENSMFAG00000000044	blue	blue	0.155757	0.142497	0.102495	0.0661675	0.131073	0.0383878	0.0735349	0.125069	0.0950681	0.0739794	-0.00535495	0.0331486	0.00499472	-0.0353305	0.111326
SLCO3A1	blue	blue	0.136559	0.198381	0.148568	0.0581945	0.0715188	0.0252118	-0.0642071	0.0443749	0.145293	0.0081665	-0.0513824	0.0469258	-0.05583	-0.0654167	0.164959
MTOR	blue	blue	0.0781852	0.0896328	0.0595499	0.0418238	0.0429106	0.025634	-0.023427	0.028637	0.0575846	0.0172835	-0.00314555	0.0307283	-0.0117773	-0.0237977	0.0695123
SLC23A2	blue	blue	0.17211	0.271603	0.200308	0.126495	0.0343227	0.039867	-0.0714468	-0.0338775	0.127638	0.00450006	-0.107032	-0.0102961	-0.0272414	0.0196834	0.309572
ATMIN	blue	blue	0.0743119	0.107913	0.034758	0.0343505	0.0463692	0.0293716	-0.0381224	0.0302464	0.0777021	-0.0413134	0.0214162	0.0493547	0.00787201	-0.00798697	0.094186
SYT8	blue	blue	0.225652	0.348014	0.257963	0.0472031	0.19695	0.0542891	-0.131455	0.110382	0.308534	0.0147797	-0.0342843	0.166029	-0.107667	-0.192099	0.221
ZMAT5	blue	blue	0.080113	0.105328	0.0216606	0.0223688	0.0938377	0.000907471	-0.00103496	0.0476384	0.0739912	-0.0189213	0.0434117	0.0218748	-0.0217413	-0.0084425	0.0738385
CKAP5	blue	blue	0.104935	0.0868897	0.0693506	0.0863348	0.037132	0.0399989	0.000438332	0.0352872	0.0378085	0.0349894	-0.024675	-0.00199453	0.0287046	0.0106602	0.0945556
AGPAT3	blue	blue	0.0968757	0.119904	0.0472224	0.0406607	0.0911802	0.0208609	-0.00896523	0.0598122	0.0988185	-0.00725368	0.0477063	0.0568542	0.00477511	-0.0167727	0.10688
LGMN	blue	blue	0.101799	0.113457	0.104419	0.0513838	0.0722985	-0.000181369	-0.0215607	0.0261506	0.0525164	0.10291	0.02422	0.0136059	0.00151652	0.00210693	0.114854
ZNF524	blue	blue	0.0769454	0.136064	0.00998343	0.000962842	0.149146	-0.0402732	0.0223832	0.0674845	0.10514	-0.0289691	0.070971	0.0417237	-0.0254799	-0.0231343	0.100774
CYP26A1	blue	blue	0.28421	0.509599	0.157403	0.107613	0.229414	0.0699958	-0.228776	0.0649798	0.388468	-0.204678	0.0146256	0.143723	-0.105675	-0.113566	0.453643
KLF4	blue	blue	0.21242	0.356791	0.177047	0.0791704	0.117148	-0.034486	-0.0972858	0.00286894	0.286342	-0.110502	-0.0347834	0.126729	-0.137696	0.0533077	0.380569
TSNAX	blue	blue	0.123854	0.133316	0.1044	0.0693574	0.0311432	0.0440256	0.00562682	0.0307699	0.0955395	-0.0041529	-0.0605107	0.0279186	-0.0315989	-0.00890683	0.111064
PLGRKT	blue	blue	0.17472	0.205736	0.0991151	0.0528535	0.182379	0.0427746	0.0655352	0.148031	0.150959	0.0104733	0.00681391	0.0561643	-0.0214865	-0.0443444	0.136141
ENSMFAG00000043624	blue	blue	0.0969004	0.146958	0.00410661	0.0197101	0.115716	-0.0202519	-0.0398366	0.037945	0.099578	-0.0496551	0.0906506	0.0376699	-0.0205932	-0.00554358	0.134612
ADH1B	blue	blue	0.315186	0.513623	0.300748	0.0958135	0.18325	0.0199424	-0.160954	0.0453359	0.387049	-0.155466	-0.0985754	0.133716	-0.219054	-0.0686959	0.441925
ENSMFAG00000042962	blue	blue	0.179778	0.170977	0.113131	0.102719	0.0591243	0.0798107	0.0288878	0.0599453	0.118257	0.0149706	-0.022429	0.0694308	0.0035815	0.01691	0.160396
APH1A	blue	blue	0.135118	0.179167	0.050661	0.0314832	0.136211	0.0272795	-0.00845371	0.0876854	0.14969	-0.0549679	0.0307315	0.0788418	-0.0321038	-0.0242092	0.12603
SSNA1	blue	blue	0.150044	0.188678	0.00459814	0.016582	0.230771	0.013748	0.0371965	0.146393	0.150199	-0.0465784	0.11418	0.0633488	-0.018237	-0.037676	0.128342
MRPL48	blue	blue	0.10101	0.106264	0.0524613	0.0511742	0.0848464	0.0270803	0.0183607	0.0596467	0.0807515	0.0113677	0.00868942	0.0339055	-0.0152151	-0.0209952	0.077604
CRYBG3	blue	blue	0.0867142	0.11412	0.0724149	0.0189306	0.0686011	0.0160536	-0.0803456	0.0338985	0.139055	-0.0331946	0.01472	0.106063	-0.0582789	-0.0570377	0.0724759
ENSMFAG00000031669	blue	blue	0.160846	0.179927	0.0616718	0.0778643	0.141424	0.0795884	0.0276294	0.119941	0.153413	-0.0440721	0.00939381	0.113262	-0.00659022	-0.0357067	0.124314
SLC66A3	blue	blue	0.101867	0.167262	0.0783491	0.0423243	0.0718556	0.0204883	-0.0286082	0.0297615	0.109703	-0.0200753	-0.0437324	0.0179453	-0.0276403	-0.0194281	0.146819
XG	blue	blue	0.139645	0.217336	0.0758334	0.0497622	0.112003	-0.00714524	-0.0452035	0.0265942	0.159232	-0.0721237	-0.0127286	0.0509904	-0.0734829	-0.0109634	0.185337
DNAJC4	blue	blue	0.0767222	0.0991962	0.0455111	0.0252373	0.0759683	-0.000732719	-0.0119617	0.0274683	0.0604693	0.026385	0.016132	0.0106864	-0.0131997	-0.00587664	0.0824622
PBX2	blue	blue	0.0738362	0.0930104	0.0595429	0.0367553	0.0448262	0.0180759	0.0117833	0.0231388	0.0555689	0.0291102	-0.00881191	0.017033	-0.0135707	0.0151427	0.092421
IRF2	blue	blue	0.0971243	0.151249	0.0155194	0.0238243	0.0997254	0.000920423	-0.0592524	0.0252639	0.128964	-0.0705682	0.0695531	0.0764968	-0.0307439	-0.0162342	0.122502
ENSMFAG00000002298	blue	blue	0.134201	0.180886	0.0776306	0.0224424	0.149333	0.0119292	-0.0317695	0.0993744	0.166662	-0.0253165	0.0417315	0.10552	-0.0538803	-0.0702003	0.114379
KMT5B	blue	blue	0.0999385	0.115221	0.0614274	0.0654183	0.0439513	0.03158	0.00238298	0.0408157	0.0823437	-0.0084686	-0.0178406	0.0384514	-0.00328871	0.00309499	0.120509
MINDY2	blue	blue	0.110667	0.154413	0.0812198	0.038032	0.0909922	0.0119748	-0.0208386	0.0447828	0.111824	-0.00332961	0.00365283	0.0420162	-0.029195	-0.0248657	0.120537
MCUB	blue	blue	0.150097	0.172806	0.0907222	0.0668956	0.132815	0.0365228	0.0351967	0.0960028	0.110022	0.0433155	0.00415649	0.0426421	-0.0204356	-0.0298201	0.150864
ALKBH7	blue	blue	0.142681	0.152851	0.0458442	0.0414534	0.169738	0.0224904	0.0858841	0.120997	0.115977	-0.00178994	0.0648671	0.0634109	0.0059719	-0.00408494	0.119697
MRPS18B	blue	blue	0.108157	0.111524	0.0520174	0.0428154	0.0809446	0.0224076	0.0314987	0.0489673	0.0761536	0.00483515	-0.0230487	0.0177914	-0.00748978	-0.00747194	0.0918967
AAMDC	blue	blue	0.121741	0.132859	0.0540419	0.0350968	0.12459	0.0220446	0.012921	0.0876644	0.108906	0.00243024	0.0295041	0.0585639	-0.012683	-0.0218487	0.108182
PIN1	blue	blue	0.154969	0.144548	0.0611883	0.0767095	0.137612	0.0579296	0.0662804	0.12159	0.0922071	0.0203361	0.0126246	0.038645	0.0163078	-0.00798527	0.111847
PSMD10	blue	blue	0.0820182	0.116455	0.0397834	0.00563753	0.089771	-0.0170784	-0.0119761	0.0490922	0.0991612	-0.0282337	0.0259318	0.0485353	-0.0428626	-0.0413982	0.08341
ANKRD13A	blue	blue	0.0916208	0.138519	0.0337427	0.0198169	0.103138	0.00188919	-0.0667564	0.0404844	0.129787	-0.0489516	0.0421763	0.0813992	-0.039553	-0.0469173	0.0981139
SLC38A10	blue	blue	0.0995558	0.123127	0.106636	0.0487358	0.0579459	0.0163817	-0.0281906	0.0124466	0.0643118	0.0521211	-0.015403	0.00981673	-0.00782744	-0.00631738	0.105123
DGUOK	blue	blue	0.139697	0.171678	0.089543	0.0639319	0.10682	0.0596126	-0.0019847	0.0764419	0.115359	0.00469607	-0.0165782	0.0614895	-0.0146422	-0.0224511	0.119496
FGFR3	blue	blue	0.234355	0.347017	0.296096	0.150027	0.0851923	0.0158039	-0.0726248	-0.0080253	0.180048	0.0621551	-0.133334	-0.00227634	-0.0864746	-0.000628495	0.348309
CAPN1	blue	blue	0.219736	0.328471	0.0818231	0.0301853	0.290031	-0.0114085	-0.0616517	0.164856	0.289779	-0.0943086	0.115611	0.153021	-0.100765	-0.079591	0.235888
MBNL2	blue	blue	0.101931	0.146083	0.149964	0.0595699	0.0154894	0.0230447	-0.0491192	-0.0142858	0.0924484	0.0516857	-0.0921983	0.0183438	-0.0378071	-0.0187887	0.137035
SAMM50	blue	blue	0.145761	0.151399	0.119778	0.0850895	0.0858627	0.034945	0.0525026	0.0721028	0.0738164	0.0742524	-0.0314053	-0.00441945	0.00275332	0.014472	0.150822
STXBP3	blue	blue	0.104577	0.118875	0.0877886	0.0559483	0.048558	0.00189385	-0.0123867	0.0119448	0.0677323	0.0344839	-0.00527634	0.0184932	-0.00661858	0.02227	0.119935
ENSMFAG00000035400	blue	blue	0.0507524	0.0756826	0.0141409	0.0134582	0.0503437	0.0254569	-0.0559241	0.0322197	0.0933025	-0.0347756	0.0585939	0.0912474	0.00200781	-0.0122755	0.0616275
CETN2	blue	blue	0.132854	0.119822	0.117413	0.0586724	0.0916626	0.0283531	0.0633376	0.0945699	0.0748932	0.0781065	-0.0229494	0.0278282	-0.004431	0.00513318	0.119372
ZXDC	blue	blue	0.0715938	0.105698	0.0389759	0.0483262	0.0416676	0.00289982	-0.0454588	0.00222498	0.0694799	-0.0354152	0.00190267	0.0208076	-0.032235	0.00934621	0.100883
TTYH1	blue	blue	0.148614	0.168783	0.10568	0.0421203	0.150264	0.0412351	-0.0266239	0.0856355	0.145633	0.0401006	0.0637706	0.0967367	-0.0012007	-0.0571582	0.127833
ST3GAL4	blue	blue	0.169753	0.28541	-0.0328752	-0.00919261	0.314946	-0.059221	-0.159743	0.0958126	0.253985	-0.116478	0.305893	0.131341	-0.0295654	-0.0377988	0.235378
JTB	blue	blue	0.192486	0.199758	0.0386245	0.0757629	0.16708	0.0721906	0.0431232	0.131827	0.166847	-0.0685432	0.0503219	0.107053	-0.0210041	-0.00693573	0.151522
SRSF9	blue	blue	0.228814	0.240661	0.0838764	0.0909448	0.217301	0.11128	0.0804622	0.188258	0.208387	-0.0480068	0.0478004	0.138999	0.0123933	-0.0394781	0.172874
ENSMFAG00000045040	blue	blue	0.108659	0.152146	0.0819527	0.034148	0.0905397	0.0171734	-0.0342579	0.0476656	0.108519	0.0171318	-0.00945769	0.0409301	-0.0140879	-0.0444663	0.108489
SIK2	blue	blue	0.059778	0.102434	0.0801665	0.0161481	0.0336731	-0.0198232	-0.0454091	-0.0182678	0.067219	0.0235007	-0.0169951	0.0188884	-0.0288084	-0.0186987	0.0861899
ENSMFAG00000033623	blue	blue	0.19776	0.213615	0.129899	0.0831023	0.140037	0.0605536	0.0290078	0.125111	0.148572	0.0168248	-0.0133585	0.0608684	-0.0390622	-0.0273988	0.166281
YIPF6	blue	blue	0.0834259	0.100277	0.0535353	0.033863	0.0565091	0.0134614	-0.0137353	0.033941	0.0773265	0.0101258	0.0112908	0.0426165	-0.0190197	-0.0255596	0.08305
EXOSC5	blue	blue	0.123121	0.119795	0.0843868	0.0791098	0.060586	0.0644522	0.0344037	0.0773144	0.0735655	0.0190001	-0.0170015	0.0320174	0.00624784	0.00609798	0.10399
TXNDC11	blue	blue	0.0826471	0.11305	0.052853	0.0563473	0.0450445	0.0238688	-0.0414389	0.00821708	0.0780185	-0.0171771	0.0130724	0.0320691	0.00467516	0.00461395	0.109626
NDUFV1	blue	blue	0.169726	0.202014	0.0774559	0.0512488	0.168917	0.0114229	0.0594115	0.112523	0.143956	-0.013857	0.0215226	0.0510821	-0.0309014	-0.00459715	0.160938
SLC50A1	blue	blue	0.0892789	0.106641	0.0333419	0.0191555	0.1008	0.0148356	-0.0253777	0.0530451	0.0913251	-0.0224809	0.0499999	0.0574809	-0.010792	-0.0162556	0.070572
MSRA	blue	blue	0.101307	0.120199	0.103604	0.0458146	0.0700338	0.0288012	0.00599065	0.0567946	0.0799714	0.0339481	-0.012142	0.0248283	-0.0226433	-0.0175202	0.0858008
PRADC1	blue	blue	0.112628	0.15268	0.034895	0.0425019	0.109927	0.0389592	0.0106125	0.0776823	0.118101	-0.0506874	0.0182172	0.0564215	-0.0139874	-0.0143689	0.105049
PIGS	blue	blue	0.094927	0.112425	0.0810261	0.0326275	0.0936729	0.0106311	-0.00958515	0.0586115	0.0740483	0.0468102	0.0259284	0.0245772	-0.0100775	-0.0169518	0.078315
MFSD11	blue	blue	0.123936	0.170155	0.10019	0.0352446	0.0915721	0.00459913	-0.0366493	0.0383577	0.123967	0.00229986	0.0253101	0.050332	-0.031996	-0.0252354	0.155426
FLOT1	blue	blue	0.110013	0.134276	0.0984848	0.0402668	0.0598942	-0.0177377	0.00222096	0.0135041	0.0657635	0.053313	-0.0285043	-0.00823475	-0.0184748	0.0145569	0.14396
PTPA	blue	blue	0.0848188	0.0967028	0.0326054	0.040194	0.0925773	-0.000812339	0.00980069	0.0539637	0.0624688	0.0279161	0.0302444	0.0141268	-0.00669103	-0.0127383	0.0811069
GALNT18	blue	blue	0.145879	0.19576	0.134728	0.0716576	0.0850512	0.0648442	-0.0271377	0.0530199	0.13734	0.00204211	-0.0696726	0.057325	-0.0333699	-0.059757	0.133381
CAMSAP1	blue	blue	0.0839011	0.104806	0.0679398	0.0466122	0.0466676	0.0176188	-0.0146801	0.031396	0.0747352	0.0143103	-0.0151279	0.0340703	-0.01352	-0.0275469	0.0914964
PAFAH1B1	blue	blue	0.150883	0.159188	0.0876721	0.0598807	0.11428	0.0309888	3.54169e-05	0.0871919	0.151774	-0.00340275	0.023174	0.0992566	-0.0250039	-0.0277218	0.139407
DNM2	blue	blue	0.111928	0.134243	0.0768743	0.0522567	0.088996	0.0276162	-0.0314114	0.0585939	0.105071	-0.000629878	0.0144162	0.052522	-0.0192009	-0.0273955	0.113097
RTCA	blue	blue	0.138567	0.157241	0.0613725	0.0414862	0.131072	0.0350389	0.00955607	0.101463	0.135588	-0.0146467	0.0142795	0.0835663	-0.0356692	-0.045343	0.104159
ENSMFAG00000001409	blue	blue	0.148371	0.1359	0.0404514	0.0672121	0.135923	0.0410452	0.0504934	0.10244	0.0867161	0.0061048	0.072726	0.0422811	0.00848429	0.00710524	0.113704
MFN2	blue	blue	0.159581	0.216904	0.118552	0.0658915	0.111908	0.011637	-0.0274438	0.0484625	0.149255	-0.0154345	-0.011595	0.0529773	-0.035377	-0.0164891	0.190182
BDH2	blue	blue	0.0834509	0.0934953	0.0909033	0.0392335	0.0336238	0.0165416	0.00986661	0.0225056	0.0512584	0.0284921	-0.0289259	0.0110114	-0.0193991	-0.0143515	0.085062
KIAA2013	blue	blue	0.111458	0.139699	0.0669766	0.0473076	0.107545	-0.00891111	-0.0162739	0.0669305	0.0954364	0.0337179	0.0447496	0.0410371	-0.0103342	-0.0245478	0.120646
TNIP1	blue	blue	0.0612874	0.104329	-0.00512358	-0.00629813	0.113695	-0.0237562	-0.0420216	0.0403025	0.0984011	-0.0362548	0.0905441	0.0637482	-0.0151823	-0.0075945	0.0731488
GPR137B	blue	blue	0.056739	0.0894832	0.0264658	-0.0116689	0.0988327	-0.0106571	-0.0229641	0.0560094	0.0832138	-0.00488064	0.0533945	0.0591395	-0.0167434	-0.0415846	0.0696907
SEC16B	blue	blue	0.158216	0.265117	0.206599	0.0499154	0.0743667	0.0339742	-0.0984876	0.0419026	0.190187	-0.0185615	-0.111085	0.0642211	-0.0899368	-0.12476	0.208529
SEC11C	blue	blue	0.234726	0.273452	0.110572	0.0852321	0.210603	0.0764066	-0.0324004	0.137517	0.224626	-0.0496881	0.0899059	0.133884	-0.0207692	-0.0304292	0.235018
SOD3	blue	blue	0.270639	0.367478	0.165892	0.152813	0.203785	0.0958094	-0.126204	0.106333	0.250841	-0.049607	0.100927	0.120394	0.0135156	-0.010243	0.375664
ITPK1	blue	blue	0.0758866	0.107546	0.0388979	0.0526413	0.0343432	0.0141083	-0.0253419	0.0100412	0.0549235	-0.0124081	0.000839592	-0.00367226	0.000158609	0.0244128	0.1256
AIFM1	blue	blue	0.100366	0.120037	0.0824378	0.0455039	0.0889731	0.0308333	0.00527916	0.063053	0.0718641	0.0296006	0.00613889	0.0196254	-0.0159469	-0.0078893	0.116082
CC2D1A	blue	blue	0.0734978	0.118804	0.0283192	0.0338205	0.0773603	-0.0116077	-0.0372305	0.0257716	0.0756356	-0.025647	0.0358416	0.0127918	-0.0102377	0.00473578	0.101898
AKTIP	blue	blue	0.144167	0.224096	0.0591051	0.0234989	0.139865	0.0267345	-0.0790058	0.0613905	0.198368	-0.100655	0.0311467	0.110912	-0.0739345	-0.0523186	0.147106
RABEP2	blue	blue	0.0826737	0.111842	0.0467467	0.0416098	0.0657636	0.0109464	-0.00831546	0.0291141	0.087927	-0.0346897	-0.00594207	0.0300062	-0.0186048	-0.00602361	0.0991954
ENSMFAG00000028837	blue	blue	0.0988739	0.115418	0.068915	0.0500592	0.0613402	0.0183954	-0.0148526	0.0346131	0.0833256	0.0112361	0.00563116	0.0421112	0.00314339	-0.0154252	0.111629
TOM1	blue	blue	0.0615919	0.0747924	0.0332987	0.0176982	0.0639775	-0.0232607	-0.00528176	0.0210044	0.0490455	0.0131549	0.0264246	0.0119228	-0.0136533	-0.00385213	0.0746003
ENSMFAG00000003997	blue	blue	0.113276	0.142894	0.0847222	0.0752529	0.0342308	0.025415	-0.0268245	0.00368866	0.0963861	0.0101493	-0.0176385	0.0419312	-0.0111983	0.0210331	0.140672
LNX2	blue	blue	0.0774924	0.108378	0.0945144	0.0636804	0.0281228	-0.0116282	-0.0332354	0.00335609	0.0650584	0.0366252	-0.0169475	0.0161774	-0.0114667	0.00496521	0.129487
EFCAB11	blue	blue	0.0578393	0.106526	0.024509	0.00629499	0.0922383	-0.0211059	-0.00750238	0.0310426	0.084103	-0.0312767	0.0227287	0.0272121	-0.042103	-0.0212688	0.0762713
IP6K1	blue	blue	0.0754498	0.0771714	0.0732693	0.0476547	0.0276989	0.0308028	-0.00142193	0.0339531	0.0485367	0.0241907	-0.0225716	0.0276737	-0.00110354	0.00484579	0.0672607
ABCB6	blue	blue	0.0789517	0.111348	0.097552	0.039028	0.0416534	-0.007992	-0.00413673	-0.00011389	0.0438068	0.0448683	-0.0286047	-0.0174683	-0.0194266	0.0151817	0.110447
GALM	blue	blue	0.115593	0.213299	0.100332	0.0368514	0.0954259	-0.00260642	-0.0558073	0.0187266	0.139195	-0.0457062	-0.0248978	0.0253862	-0.0447069	-0.0128525	0.171735
CPOX	blue	blue	0.084889	0.0966859	0.0653171	0.0305609	0.0625696	0.0150783	0.0042654	0.0540161	0.0786537	0.00380424	-0.00950626	0.0459129	-0.0279886	-0.0331637	0.0613502
SLC35A1	blue	blue	0.115951	0.1814	0.0577857	0.0376935	0.110435	0.0349794	-0.048254	0.054425	0.146023	-0.0551963	0.0177588	0.0740497	-0.0450252	-0.0492366	0.125742
XDH	blue	blue	0.233853	0.422153	0.128043	0.0649826	0.226278	-0.00534692	-0.167581	0.0671136	0.338292	-0.170603	0.0179931	0.133554	-0.144804	-0.0840681	0.338098
NDUFA9	blue	blue	0.142648	0.146043	0.0877502	0.0655281	0.141395	0.0435417	0.043666	0.122067	0.113792	0.0294395	0.00157676	0.0448509	-0.023284	-0.0431786	0.0903858
ELF2	blue	blue	0.139524	0.144526	0.137435	0.113503	0.0116797	0.0755765	-0.00914084	0.0139253	0.0922801	0.0229853	-0.0574986	0.0470016	0.0124214	0.00785747	0.12978
RIPK4	blue	blue	0.172081	0.241267	0.0924502	0.0783672	0.192883	0.00522878	-0.0684829	0.0905719	0.165043	0.0164315	0.0958989	0.0687514	0.000620231	-0.0177717	0.239945
USF2	blue	blue	0.0931388	0.124119	0.0468203	0.0374057	0.0873011	-0.0150121	-0.00060575	0.0286816	0.0754762	-0.00609429	0.0369228	0.0170558	-0.0216103	0.011914	0.121844
NCOA1	blue	blue	0.0583944	0.0845097	0.0116461	0.0266791	0.0487624	-0.000457355	-0.0358982	0.00234183	0.0638016	-0.0281204	0.0372282	0.0290967	-0.0121653	0.0242035	0.0751353
ANKRD9	blue	blue	0.179018	0.277043	0.0816684	0.0375765	0.17268	0.0459268	-0.118746	0.101052	0.26765	-0.129975	0.0626208	0.178266	-0.0784536	-0.085156	0.205404
PWWP3A	blue	blue	0.0788106	0.0908178	0.0238359	0.0310903	0.0588502	0.0180522	-0.0255618	0.0338128	0.077405	-0.0204303	0.0469034	0.0621962	-0.012333	0.000441665	0.0831342
SYNGR2	blue	blue	0.12838	0.147908	0.0614787	0.0437122	0.104472	0.0294803	-0.0284915	0.0597084	0.120226	-0.025398	0.037499	0.0713387	-0.030697	-0.0108509	0.113584
MPP6	blue	blue	0.0990786	0.118188	0.0771516	0.0482049	0.0545536	0.057338	-0.00589009	0.0360442	0.0877282	-0.0113786	-0.0289844	0.0391089	-0.00805167	-0.039216	0.096345
KLHL20	blue	blue	0.0480328	0.0655181	-0.00332088	0.0369731	0.0466133	0.0109621	-0.0186137	0.0146635	0.0381894	-0.031242	0.0477921	0.0188361	0.0165408	0.0292382	0.0686172
INPPL1	blue	blue	0.0843728	0.0939009	0.0785731	0.0458959	0.0659749	-0.0085578	-0.0307039	0.0194401	0.0494583	0.0794583	0.0310588	0.0103864	0.0198627	0.000671284	0.102448
TERF2IP	blue	blue	0.119438	0.114333	0.0983601	0.100075	-0.00490959	0.0784477	-0.0150082	0.0253022	0.0746396	0.0178275	-0.0610262	0.0392422	0.00528898	0.00701724	0.110573
ENSMFAG00000036801	blue	blue	0.131102	0.236573	0.0127106	0.0328846	0.17566	-0.00304253	-0.0339639	0.0736496	0.170567	-0.120998	0.0590961	0.0546494	-0.0413722	-0.0359008	0.200145
OXR1	blue	blue	0.187287	0.25271	0.120953	0.0904984	0.118484	0.0501238	-0.0841612	0.0591341	0.20818	-0.0431374	0.016351	0.119279	-0.0479817	-0.0493385	0.203525
FAM126B	blue	blue	0.0762029	0.0995238	0.0630223	0.0453628	0.0278058	0.0347371	-0.0215017	0.0333229	0.0812774	-0.0138968	-0.0251719	0.0506985	-0.0124871	-0.0329024	0.0839358
SPPL3	blue	blue	0.114174	0.134731	0.0461073	0.0457578	0.100982	0.0357484	0.00753703	0.0712741	0.10321	-0.0208989	0.0292954	0.057601	-0.0175474	-0.00162582	0.0962686
EZH2	blue	blue	0.0732642	0.0669978	0.013595	0.064818	0.0597921	0.039903	-0.0107116	0.0454055	0.0496604	-0.00299623	0.0444844	0.0350705	0.0423132	0.0226274	0.0769651
TAF4B	blue	blue	0.0811686	0.15836	0.0139619	0.019634	0.144018	-0.0124982	-0.049125	0.0649337	0.152007	-0.0786567	0.0683401	0.0932032	-0.028862	-0.00165775	0.12348
SSR4	blue	blue	0.194196	0.168599	0.0717828	0.0835986	0.162927	0.0745524	0.0704775	0.153001	0.14311	0.0178933	0.0738057	0.113162	0.0310803	-0.0165973	0.137281
SHTN1	blue	blue	0.0952411	0.149815	0.0533402	0.0188655	0.12127	0.0128749	-0.0219064	0.0738388	0.124148	-0.0462333	0.00779852	0.062331	-0.0394743	-0.0492568	0.0989975
RIOX2	blue	blue	0.0929467	0.135283	0.0039201	0.0281779	0.11665	-0.0098196	-0.040711	0.0444314	0.096513	-0.0401451	0.0828246	0.0400474	-0.00538771	-0.00853208	0.131242
SOGA1	blue	blue	0.106611	0.180559	0.119803	0.0468442	0.0661681	-0.00309269	-0.0880247	-0.00353252	0.130244	0.00428752	-0.0157858	0.0504863	-0.0438161	-0.0132502	0.170554
DAPK1	blue	blue	0.143739	0.208429	0.0392434	0.103936	0.0750692	0.0186393	-0.0882834	-0.0090814	0.129619	-0.0825918	0.0578069	0.040658	-0.00210286	0.0606169	0.218331
ZFP36L1	blue	blue	0.250588	0.429525	0.117251	0.0577451	0.232042	-0.0306716	-0.14807	0.0757402	0.386226	-0.201419	0.0985811	0.208836	-0.15674	-0.0300766	0.415658
BABAM2	blue	blue	0.113629	0.143202	0.0626822	0.0277377	0.107476	0.0251466	-0.0104736	0.0687633	0.119503	-0.02604	0.0145106	0.0628684	-0.0387302	-0.0285222	0.111517
ENDOV	blue	blue	0.0819772	0.0801617	0.0426973	0.0454929	0.0683643	0.0220384	0.0526569	0.0679605	0.0534331	0.0082404	-0.00941108	0.0152517	0.0090069	0.00824563	0.0751997
ZMYND8	blue	blue	0.0765512	0.095527	0.0538636	0.0408002	0.0644479	0.00271415	-0.013363	0.0338149	0.0525968	0.0282269	0.0222042	0.0164876	0.00264299	0.0153856	0.0899589
PBLD	blue	blue	0.137535	0.184166	0.118572	0.0575163	0.0858193	-0.000288546	-0.00627869	0.0309455	0.101751	0.0347545	-0.00596826	0.00358949	-0.0278195	0.00439626	0.179769
POLR2I	blue	blue	0.142734	0.164628	0.0800653	0.0404512	0.159003	0.0254866	0.0562025	0.11393	0.116483	0.0264286	0.00206543	0.0490856	-0.0189965	-0.0566571	0.0973982
CREBL2	blue	blue	0.087739	0.141264	0.0536711	0.0172915	0.074595	-0.00813387	-0.0266298	0.0167242	0.0963101	-0.0246572	0.0129118	0.0281895	-0.0295925	-0.0138391	0.128831
PRKRA	blue	blue	0.103236	0.1148	0.075481	0.0609018	0.0587077	0.0018111	0.0310183	0.0364901	0.06737	0.0349305	0.000315075	0.0107545	0.00604795	0.0143313	0.125906
EVPL	blue	blue	0.298298	0.489784	0.306268	0.0426413	0.357196	-0.00191395	-0.143205	0.206941	0.406477	0.00156025	0.0129182	0.176939	-0.146912	-0.259639	0.345452
SUCLG1	blue	blue	0.162428	0.168906	0.0659517	0.0755485	0.176104	0.00881332	0.0704804	0.128464	0.115691	0.0203088	0.0347529	0.0347887	-0.0152078	-0.01907	0.11577
MADD	blue	blue	0.0416372	0.0584631	0.0336651	0.0419034	0.0189982	-0.0123139	-0.039499	-0.0176354	0.0253176	0.0176987	0.00308379	-0.00819542	-0.00688421	0.0106766	0.0661529
MGST2	blue	blue	0.106647	0.126017	0.0237179	0.0457059	0.0779563	0.027494	-0.0286757	0.0309441	0.0935664	-0.0204306	0.0623775	0.055084	0.0122261	0.021891	0.122319
ZDHHC20	blue	blue	0.134628	0.143893	0.129867	0.0644713	0.0838307	0.0060653	0.00551748	0.0370025	0.0757408	0.104973	0.00503913	0.0124131	0.00316988	-0.00930634	0.147554
DHX32	blue	blue	0.0869649	0.119779	0.0401824	0.0296963	0.105744	-0.0158843	-0.0232978	0.0489983	0.0844655	0.0138809	0.0642808	0.0391828	-0.0130686	-0.0130558	0.116153
SRD5A3	blue	blue	0.0742116	0.0984782	0.0286232	0.0269662	0.081598	0.00980959	0.00214369	0.0475721	0.0705143	-0.0164859	0.0166659	0.0274948	-0.0164794	-0.0164111	0.0665934
VPS13A	blue	blue	0.0994907	0.113789	0.107647	0.0816896	0.0335708	0.036226	-0.0144077	0.0244176	0.0591109	0.0396462	-0.037199	0.0159779	-0.0017714	-0.00638543	0.0964222
BRI3BP	blue	blue	0.0827061	0.119081	0.00893686	0.0141869	0.118529	0.0145304	-0.0657651	0.0706729	0.130926	-0.0528417	0.0755975	0.0990428	-0.020916	-0.0530271	0.0681063
DAAM1	blue	blue	0.191521	0.270931	0.170627	0.039453	0.191672	0.0249511	-0.0805388	0.119204	0.236376	0.0190435	0.00686039	0.131712	-0.0662886	-0.116779	0.183904
CCND3	blue	blue	0.0996242	0.160911	0.0318959	-0.0130251	0.174689	-0.013407	-0.0592193	0.0732672	0.166477	-0.0412191	0.0762718	0.10807	-0.0505357	-0.0806035	0.0782816
ENSMFAG00000000244	blue	blue	0.161604	0.192379	0.0355571	0.0299489	0.204564	0.02025	0.0201228	0.123046	0.172337	-0.0442871	0.0930911	0.103352	-0.0256341	-0.0467855	0.132962
PHACTR4	blue	blue	0.0928416	0.144213	0.00881624	0.0320949	0.110612	0.00653505	-0.0556792	0.0581659	0.142832	-0.0666509	0.0887906	0.108725	-0.0125789	-0.0229556	0.119842
ENSMFAG00000037064	blue	blue	0.0771917	0.118331	0.0563191	0.00122027	0.115922	-0.0320905	-0.0222524	0.0479832	0.0973535	0.0276954	0.0322526	0.0386684	-0.0287227	-0.0469057	0.0986571
CMBL	blue	blue	0.15629	0.187419	0.159015	0.103959	0.0300638	0.054874	0.000791795	0.0220051	0.0976958	0.0363194	-0.0648286	0.0148234	-0.0203679	0.0160865	0.20321
VSNL1	blue	blue	0.0762686	0.11652	0.0726553	0.0369672	0.0215405	0.00717769	0.0532505	0.0141356	0.0587987	-0.0291479	-0.090764	-0.0205495	-0.061175	0.0019088	0.11129
ERICH5	blue	blue	0.406335	0.638391	0.505561	0.103185	0.275212	0.0410854	-0.22316	0.115846	0.502307	-0.0311758	-0.113828	0.193403	-0.232657	-0.234654	0.529434
BRMS1	blue	blue	0.14162	0.142583	0.0976369	0.0712954	0.10358	0.0261455	0.0338071	0.0742001	0.0789058	0.0668843	-0.0019416	0.0140749	0.00156759	-0.00488246	0.141929
MED31	blue	blue	0.136115	0.15958	0.0410962	0.0518421	0.128555	0.0382178	0.00454932	0.0871485	0.124321	-0.0243841	0.0466525	0.0737537	-0.00174702	-0.00483097	0.113949
MTA3	blue	blue	0.0983033	0.143887	0.0398136	0.0200101	0.118969	0.00322245	-0.0270484	0.0664497	0.117178	-0.0441033	0.0409653	0.0605318	-0.0372376	-0.0517918	0.0890592
NIPSNAP3A	blue	blue	0.126364	0.156683	0.066379	0.034032	0.129454	0.0197868	0.0171143	0.0932946	0.116885	-0.00191142	0.00770882	0.0556755	-0.0393053	-0.0380221	0.108494
GTPBP8	blue	blue	0.0720799	0.0842059	0.0603874	0.036025	0.0682706	0.00825197	0.0282012	0.0530554	0.0426631	0.0325557	0.00519352	0.000412148	-0.0122939	0.0014879	0.0730496
KIAA1211L	blue	blue	0.154352	0.256334	0.0840257	0.0678677	0.155276	0.0145874	-0.0758978	0.070856	0.187214	-0.0698962	0.0214462	0.0663599	-0.0504844	-0.0393621	0.220683
INO80E	blue	blue	0.0917239	0.0924991	0.0563927	0.0685563	0.0416583	0.0418147	0.0323745	0.0318378	0.0327949	0.0295836	-0.0192405	-0.00171144	0.0255707	0.0296259	0.105538
COMMD7	blue	blue	0.135732	0.179402	0.0585282	0.0347979	0.162412	0.0199732	0.0288291	0.116528	0.114796	-0.0122731	0.0296446	0.0323858	-0.0187268	-0.0288358	0.127704
SASH1	blue	blue	0.111989	0.164089	0.0534392	0.0536151	0.110547	0.0243796	-0.0688007	0.046107	0.118391	-0.0197129	0.0722154	0.0629373	0.00567042	-0.0201171	0.133943
NADSYN1	blue	blue	0.109048	0.167789	0.06096	0.0167687	0.125336	0.00864101	-0.0584833	0.0543664	0.145984	-0.0555217	0.0284808	0.0750101	-0.0432398	-0.0810565	0.114887
CEP290	blue	blue	0.0796134	0.0905804	0.104843	0.0528456	0.0070405	0.00673593	-0.0181609	-0.0103037	0.0323019	0.0761757	-0.0510126	-0.0230967	-0.00467633	0.0205421	0.100711
FBXW5	blue	blue	0.136491	0.190281	0.0790045	0.05985	0.115215	0.029737	-0.0113377	0.0684658	0.138448	-0.0384061	-0.00410523	0.0560226	-0.030668	-0.0381649	0.139468
FBXO42	blue	blue	0.0744622	0.109488	0.000588169	0.0473605	0.0787283	0.0224981	-0.0421851	0.0407575	0.0948084	-0.053525	0.07039	0.0800629	0.000778386	0.0190075	0.110054
GPBP1	blue	blue	0.126958	0.149946	0.0703377	0.0544359	0.0903394	0.0373463	-0.0464268	0.0711269	0.160059	-0.0214067	0.0432566	0.135409	-0.0260214	-0.042763	0.126581
BSG	blue	blue	0.187494	0.185343	0.15712	0.107418	0.132947	0.0989097	0.0503087	0.13777	0.12833	0.067922	-0.0343014	0.0642794	0.0172576	-0.0456493	0.12887
DCTN2	blue	blue	0.173134	0.215279	0.100964	0.0267068	0.209365	-0.000506581	0.026971	0.130587	0.176283	0.0150425	0.0385369	0.0817311	-0.0625483	-0.0616383	0.157058
NIPBL	blue	blue	0.116291	0.114112	0.0791088	0.0995711	0.0287098	0.0409334	-0.0542886	0.0112538	0.082046	0.0169351	0.00205793	0.0606469	0.00314659	0.0101198	0.120394
CTDSP2	blue	blue	0.103867	0.120124	0.06851	0.0470354	0.0554727	0.0225574	-0.0150796	0.0298199	0.0851056	0.0180362	0.00806987	0.0492277	-0.0117485	0.0142878	0.112479
MPC1	blue	blue	0.111738	0.14974	0.0444478	0.0137463	0.129068	0.0219003	0.0272753	0.101942	0.136789	-0.0425222	-0.00238125	0.0678054	-0.0485832	-0.0615618	0.0776262
VAC14	blue	blue	0.0565732	0.0711544	0.028751	0.0244484	0.0605249	0.00330842	-0.0225839	0.0314211	0.0501712	0.00990194	0.0313533	0.0213773	-0.0102418	-0.0249259	0.0538844
GGA2	blue	blue	0.0852291	0.130814	0.0472722	0.0511068	0.0662465	0.0164659	-0.0250143	0.01135	0.0821944	-0.026316	-0.00549868	0.0148207	-0.0157986	-0.000311422	0.117802
MOSMO	blue	blue	0.121087	0.157999	0.0840442	0.0689454	0.0412836	0.0660303	-0.0314822	0.0321862	0.112255	-0.0365767	-0.0238985	0.0529142	-0.00835137	-0.00396239	0.129125
STK25	blue	blue	0.137698	0.15842	0.0586352	0.0403839	0.145819	0.0286816	0.0296011	0.102289	0.120176	-0.0100869	0.0269206	0.0484143	-0.0218841	-0.035272	0.112361
CTNNB1	blue	blue	0.137224	0.106069	0.106197	0.100903	0.0731467	0.0241054	0.0371784	0.0627206	0.0606602	0.113216	0.00502872	0.0318311	0.0237835	0.0331468	0.126023
DCAF6	blue	blue	0.11933	0.135444	0.108241	0.0548596	0.049516	0.0278815	0.00934427	0.0328408	0.0787913	0.0435	-0.038533	0.0199939	-0.0316108	-0.0111574	0.120259
ENSMFAG00000003654	blue	blue	0.109441	0.129941	0.0425402	0.0449048	0.0899679	0.0280452	-0.007174	0.0567542	0.0977915	-0.0221066	0.0413893	0.0450788	-0.00318658	0.00807672	0.111682
GLRX5	blue	blue	0.192523	0.227186	0.0922878	0.0885806	0.160419	0.0739387	0.00270899	0.102064	0.164071	-0.0241236	0.019892	0.0842068	-0.00344455	-0.0144347	0.163506
MAPK13	blue	blue	0.154939	0.219961	0.0981189	0.0347167	0.182751	0.0230287	-0.0131653	0.125025	0.192989	-0.0475573	0.032798	0.109649	-0.056505	-0.087962	0.138666
ENSMFAG00000035566	blue	blue	0.150806	0.202493	0.111655	0.0894641	0.100606	0.0480339	-0.0641154	0.0592498	0.147927	-0.0277914	-0.000862584	0.0714027	-0.0411885	-0.0449486	0.159998
CENPX	blue	blue	0.151904	0.141475	0.0324601	0.0592105	0.147414	0.0461382	0.0354523	0.107174	0.0847072	-0.0094117	0.0470537	0.0313784	0.00746307	0.00953459	0.119881
UXS1	blue	blue	0.212847	0.323637	0.12832	0.0930209	0.180352	0.0408618	-0.110718	0.0730144	0.23822	-0.071823	0.0466944	0.10403	-0.0431235	-0.0529418	0.268515
SLC22A18	blue	blue	0.0964178	0.161419	0.0572816	0.00162009	0.137533	-0.0030544	-0.0317077	0.0837195	0.140478	-0.0366581	0.0327094	0.0733947	-0.050206	-0.0767978	0.100568
ERP29	blue	blue	0.166955	0.179201	0.125471	0.0807694	0.136688	0.0223659	0.0273065	0.0733411	0.106666	0.0710255	0.0200034	0.0272151	-0.0137184	-0.000719116	0.165773
NDUFA10	blue	blue	0.168197	0.180214	0.0701243	0.0943162	0.140101	0.0593201	0.0576129	0.12147	0.125796	-0.000975617	0.00847036	0.0499047	7.76971e-05	0.00452163	0.14765
SERINC1	blue	blue	0.118838	0.152712	0.0901336	0.0317336	0.0783264	0.00155625	-0.0759809	0.0133062	0.138887	-0.00746882	0.0130861	0.0845497	-0.0434489	-0.0302139	0.121326
SETD7	blue	blue	0.111132	0.144622	0.107146	0.0640132	0.0604404	0.00545807	-0.0297109	-0.00319426	0.0825665	0.0399198	-0.0138343	0.0110228	-0.0223042	-0.0024819	0.146597
AKAP9	blue	blue	0.192696	0.269321	0.159579	0.0745574	0.128037	-0.0138142	-0.0808429	0.0317537	0.190228	0.0234476	0.000672593	0.061941	-0.0771876	-0.02931	0.226513
ZMIZ1	blue	blue	0.108354	0.177776	0.0673774	0.0377228	0.0975339	-0.00419319	-0.0490591	0.0434856	0.136668	-0.0460753	0.0160053	0.0585211	-0.0453799	-0.0233858	0.163942
ENSMFAG00000032662	blue	blue	0.316939	0.503376	0.370363	0.128639	0.142411	0.0928221	-0.0784203	0.0861656	0.356669	-0.0669777	-0.253926	0.0836012	-0.174278	-0.146817	0.412963
EPN2	blue	blue	0.0861985	0.12958	-0.00974594	0.0347982	0.111929	-0.0162512	-0.0319417	0.0345854	0.104037	-0.0700311	0.0875379	0.055948	-0.0285479	-0.0048155	0.0969466
DDX1	blue	blue	0.163986	0.178515	0.140756	0.0727976	0.104746	0.050776	0.0269876	0.0874847	0.126136	0.0444002	-0.0353146	0.0512658	-0.0159869	-0.0438599	0.150826
NLRX1	blue	blue	0.0638164	0.106096	0.0320231	-0.00588481	0.0975662	-0.0185297	-0.0300226	0.0566158	0.0963584	-0.0349768	0.0275598	0.050534	-0.0360878	-0.0363212	0.0668715
DYNLL2	blue	blue	0.197893	0.244973	0.12699	0.088373	0.12859	0.0906725	-0.0278317	0.110872	0.20964	-0.0407343	-0.0246802	0.119395	-0.0236601	-0.051194	0.181041
ARSD	blue	blue	0.0787255	0.0915386	0.0741857	0.0320756	0.036604	-0.00829425	-0.00929043	0.00285903	0.0448108	0.0436823	0.00583392	-0.00081554	-0.00129395	0.00616494	0.101835
DDX6	blue	blue	0.132829	0.151695	0.0881993	0.0883701	0.0899687	0.0227001	-0.0359642	0.0462164	0.103542	0.0186819	0.019337	0.0510907	0.00598111	-0.0109421	0.145406
NDUFA8	blue	blue	0.14022	0.157228	0.064643	0.052649	0.119475	0.0238652	0.0288561	0.0775415	0.104027	-0.000129225	0.0248345	0.0431406	0.00169107	0.000951159	0.127134
NFATC2	blue	blue	0.083599	0.152503	-0.0264613	0.0215093	0.111942	-0.00766694	-0.0717318	0.0310278	0.125301	-0.0870499	0.0971115	0.0668491	-0.0159535	0.0324041	0.145996
RNF139	blue	blue	0.0817564	0.108487	0.0277579	0.0540098	0.0592786	0.0254786	-0.0248777	0.0278619	0.0751989	-0.0194498	0.0198088	0.0400005	-0.00220509	0.000750662	0.0977383
PXK	blue	blue	0.114344	0.17499	0.0392282	0.0265309	0.103795	0.00294874	-0.081021	0.0356685	0.152085	-0.0675144	0.0286749	0.0773997	-0.0562624	-0.0293389	0.119674
AFF4	blue	blue	0.116153	0.154067	0.0453041	0.0731403	0.100824	0.0172302	-0.0884672	0.0498018	0.134684	-0.0356044	0.0816491	0.103107	-0.000646954	0.00647076	0.146499
STX8	blue	blue	0.110469	0.127544	0.0579505	0.027051	0.127235	-0.00618986	0.0329298	0.0953678	0.0919478	0.0196644	0.0249891	0.0236533	-0.0207206	-0.0254007	0.106042
PTER	blue	blue	0.0929226	0.139347	0.0858765	0.0271351	0.0545572	0.0277062	-0.0184695	0.0429067	0.105825	-0.00573556	-0.0235759	0.0460701	-0.0181877	-0.0437036	0.0979619
PIAS3	blue	blue	0.0510979	0.0621716	0.0316576	0.0289201	0.0369648	-0.00483175	0.00090437	0.01727	0.025573	0.0289287	-0.00127602	-0.00910995	0.0118651	0.0283925	0.0763735
RORA	blue	blue	0.112599	0.203157	0.0955792	0.062486	0.0517141	0.00279262	-0.078741	0.00327123	0.162811	-0.0802493	-0.030342	0.0747877	-0.0651611	0.00860957	0.208456
TRAM1	blue	blue	0.143556	0.158271	0.0580356	0.0304362	0.155578	0.0115257	-0.0303401	0.0864796	0.14171	0.0229032	0.0932159	0.0972035	-0.00383268	-0.0299829	0.117483
USP20	blue	blue	0.0698397	0.0799384	0.0550627	0.0495558	0.0284977	0.0233854	-0.0272687	0.00692104	0.048904	0.00873354	-0.00504616	0.0214121	0.0026676	0.00778901	0.0786696
CADM1	blue	blue	0.0796372	0.110584	0.20157	0.0585946	-0.0276842	0.021808	-0.0137784	-0.025976	0.0565568	0.0680683	-0.143229	-0.0134234	-0.0591659	-0.0449114	0.0805527
ATG4D	blue	blue	0.092473	0.116474	0.0227936	0.0240353	0.0965947	0.00866561	-0.0185638	0.0562646	0.0995277	-0.0342375	0.021037	0.055341	-0.0162697	-0.0250571	0.0742147
DGCR2	blue	blue	0.12818	0.207899	0.0625594	0.0177735	0.149582	-0.0156941	-0.0764759	0.0671877	0.17324	-0.0411859	0.0491076	0.0749062	-0.0471173	-0.0729563	0.153932
TNPO2	blue	blue	0.0760937	0.0819787	0.0530574	0.0492835	0.041316	0.042677	-0.0128207	0.0395895	0.0618976	0.00871852	-0.00559208	0.0395266	0.0159318	-0.0132454	0.0541907
KAT2B	blue	blue	0.148365	0.282854	0.128218	0.0349476	0.149208	-0.0104319	-0.0910431	0.0422498	0.217282	-0.0741553	-0.0299565	0.0787856	-0.102314	-0.0836098	0.22922
TPGS2	blue	blue	0.0943134	0.0923481	0.0713794	0.036544	0.0813923	-0.00831914	0.0309153	0.0596547	0.0543618	0.054766	-0.000988759	0.0112331	-0.0103236	0.00235363	0.090417
SLTM	blue	blue	0.15732	0.15728	0.0989665	0.102879	0.057539	0.077022	-0.0205748	0.0486599	0.11027	-0.00113754	-0.0240542	0.064352	-0.000147969	-0.00378739	0.120764
FBXO4	blue	blue	0.0713031	0.0938384	0.0297311	0.0361138	0.0903954	-0.0103927	0.0142499	0.0454658	0.0543154	0.00149573	0.0397473	0.00492941	-0.00215149	0.00706069	0.0897958
LZIC	blue	blue	0.109226	0.118344	0.0520565	0.0404992	0.102188	0.0297246	0.032936	0.0859678	0.0998837	-0.00883141	0.0108416	0.0645353	-0.0112009	-0.0386217	0.0780184
THEM6	blue	blue	0.100798	0.132663	0.0272783	0.0393302	0.12793	-0.0181126	0.0156143	0.0625876	0.0810737	-0.00772742	0.0711204	0.013314	-0.00287863	-0.0015937	0.13276
SEL1L	blue	blue	0.102136	0.123087	0.0774032	0.0538321	0.0672115	0.00701903	-0.0594187	0.0227927	0.0981798	0.0213031	0.0226907	0.0557924	-0.0150091	-0.0163623	0.108824
GABARAPL2	blue	blue	0.178303	0.201091	0.0414766	0.0463696	0.177364	0.0465802	0.0130103	0.120137	0.19333	-0.0624525	0.0930892	0.142556	-0.0248992	-0.0326367	0.142473
NIT1	blue	blue	0.0716846	0.0800187	0.0226413	0.0266743	0.0641871	-0.00575129	0.0182785	0.0332829	0.0470286	0.0135128	0.0281231	0.00389158	-0.00587184	0.0153366	0.0873587
PPP2R3A	blue	blue	0.0733045	0.0965466	0.0509947	0.0521487	0.0407723	-0.00543667	-0.0194398	0.0122413	0.0519018	0.0151922	0.0176064	0.005663	0.00784949	-0.000470118	0.101534
NDUFB5	blue	blue	0.200429	0.218349	0.128158	0.0716509	0.172279	0.0488302	0.0247411	0.140925	0.180511	0.0102705	0.0237948	0.103856	-0.0269211	-0.0478916	0.169917
PAIP2	blue	blue	0.147108	0.165237	0.0881275	0.0381548	0.120702	0.0620275	0.00528169	0.0984274	0.159216	-0.0289967	0.000893193	0.107338	-0.0251929	-0.0471819	0.118357
FAH	blue	blue	0.0777781	0.0840035	0.064422	0.0299475	0.0627769	0.0151738	0.0281944	0.0291896	0.0458912	0.029057	0.0109103	0.00457202	-0.00489399	0.0132147	0.0855541
BET1	blue	blue	0.115332	0.13138	0.048402	0.0395583	0.1145	0.00248058	0.013667	0.0564109	0.0862721	0.0144813	0.029942	0.0349193	-0.016258	0.000518876	0.124512
BBOX1	blue	blue	0.134127	0.233418	0.0923878	0.0768709	0.0460989	0.0310857	-0.0602121	0.00535312	0.139939	-0.0864158	-0.0601298	0.0182819	-0.0448188	0.0120125	0.251093
USP46	blue	blue	0.0547342	0.070603	0.0247744	0.0282269	0.0420066	0.00763225	-0.00304061	0.0209908	0.0432053	-0.0132962	0.0111972	0.00742839	-0.0010416	0.00430461	0.0655251
RBX1	blue	blue	0.218073	0.222619	0.0807523	0.0774476	0.225903	0.0686483	0.0765944	0.195823	0.187825	-0.0224411	0.0516807	0.112972	-0.0252956	-0.040516	0.147714
CDS1	blue	blue	0.177401	0.288765	0.0989717	0.0432312	0.165918	0.0265612	-0.116804	0.0811567	0.267268	-0.11735	0.0114845	0.157242	-0.0969172	-0.109544	0.208457
WNT7B	blue	blue	0.14984	0.194282	0.16356	0.079887	0.077441	0.0374519	-0.01583	0.0390932	0.126984	0.0466932	-0.0286669	0.0465097	-0.0181701	-0.032764	0.19095
ARHGAP1	blue	blue	0.12121	0.166517	0.0538568	0.0197235	0.148567	-0.0136496	-0.0122999	0.066462	0.119938	-0.006232	0.0608728	0.0545063	-0.0090147	-0.0192542	0.141719
TP53INP1	blue	blue	0.0744153	0.135114	0.0161612	0.00671262	0.129804	-0.0662086	-0.0227158	0.0143409	0.0851834	0.00038752	0.0780399	0.00521281	-0.0274435	-0.00461877	0.128105
SDHB	blue	blue	0.185308	0.182399	0.137273	0.0870614	0.107877	0.0886161	0.0308122	0.0990052	0.138489	0.0121087	-0.0343962	0.0659399	-0.0102238	-0.0423555	0.139757
ANKRD35	blue	blue	0.070807	0.162627	-0.0503779	-0.00649103	0.175784	-0.0276526	-0.0712812	0.0793497	0.149304	-0.10766	0.155293	0.0928921	-0.0255827	-0.0338792	0.107038
SPTAN1	blue	blue	0.14776	0.231658	0.0457539	0.0385316	0.173989	-0.01161	-0.11638	0.0672317	0.223336	-0.0937208	0.0783797	0.140477	-0.0825907	-0.0218241	0.164327
SEMA3B	blue	blue	0.104808	0.167599	0.20225	0.05571	0.00854316	0.0315309	-0.103247	-0.0176631	0.111404	0.0737744	-0.0922093	0.0245657	-0.0728493	-0.0679028	0.140304
ARHGEF10L	blue	blue	0.0897084	0.149496	0.0517515	-0.000460593	0.129804	-0.00175082	-0.043632	0.0627808	0.129737	-0.0285749	0.0444667	0.0502836	-0.042664	-0.0598656	0.0987658
MAP3K13	blue	blue	0.08352	0.119606	0.050963	0.0451405	0.0467189	0.0387478	-0.0185831	0.0245428	0.0747308	0.00190146	-0.0149945	0.0280269	-0.000643082	0.00389272	0.107913
STX10	blue	blue	0.112116	0.134871	0.0448626	0.0546066	0.119764	0.0336672	0.00814152	0.0790977	0.0920361	0.0101855	0.0429968	0.0412482	0.0113021	-0.000890735	0.109158
ZBED2	blue	blue	0.190082	0.323235	0.294281	0.0729269	0.0692563	0.0179586	-0.0899284	0.00208959	0.194678	0.0519285	-0.170625	0.0193758	-0.104701	-0.0942835	0.281087
NELFCD	blue	blue	0.115372	0.116715	0.0468765	0.0698311	0.0763742	0.0340002	0.0337516	0.0421985	0.0666565	0.00831146	-0.00112345	0.0182894	0.00681226	0.0296855	0.105703
ENSMFAG00000037502	blue	blue	0.0800098	0.107749	0.00269766	0.00713839	0.104141	-0.0260149	0.00914604	0.0353909	0.0719294	-0.0148422	0.0707729	0.0237505	0.00317589	0.00941795	0.104361
ENSMFAG00000002843	blue	blue	0.0776439	0.076327	0.0392985	0.0410497	0.0586854	0.0121121	0.0181913	0.0471958	0.0433527	0.0260111	0.00561292	0.00434437	-8.08975e-05	0.0107894	0.0675173
EI24	blue	blue	0.150981	0.162207	0.0456989	0.061706	0.139682	0.0201272	0.0279695	0.0894186	0.118349	-0.014187	0.0461639	0.0498188	-0.019509	0.00156878	0.135494
UQCRC1	blue	blue	0.211917	0.180439	0.192855	0.115815	0.126081	0.0573726	0.129768	0.124948	0.0731717	0.148665	-0.0678744	-0.00904477	0.00182977	0.0298764	0.167753
CD200	blue	blue	0.0775653	0.111918	0.0447492	0.0710964	0.0484712	0.0039502	-0.0353741	0.00750805	0.0546113	0.00605319	-0.00779646	-0.0111298	0.00977665	0.0302288	0.136781
TMEM185A	blue	blue	0.0951043	0.125195	0.0441652	0.0305335	0.105663	-0.00796752	-0.00594621	0.0530106	0.0804486	0.0102909	0.0305161	0.0198935	-0.0131661	0.00119768	0.10719
MORF4L1	blue	blue	0.143308	0.138215	0.110363	0.0923706	0.0547007	0.036861	0.00595917	0.0391128	0.0822465	0.0582986	-0.0220246	0.0181744	-0.00391083	0.016224	0.151378
NIN	blue	blue	0.168176	0.232976	0.208932	0.092031	0.0595178	0.0698021	-0.0902378	0.0292427	0.159862	0.0399527	-0.0653862	0.0676664	-0.0383053	-0.0727837	0.194908
GGPS1	blue	blue	0.0880003	0.0941238	0.0447758	0.0384243	0.0364368	0.0369405	0.0159578	0.0231053	0.0743337	-0.0232086	-0.0207728	0.054355	-0.0259485	0.000544303	0.0651496
MAGI3	blue	blue	0.120049	0.177893	-0.0267116	0.0280153	0.176987	0.0136686	-0.093124	0.0509796	0.173496	-0.0967605	0.179444	0.12548	-0.00725115	-0.00432064	0.148111
PARD6G	blue	blue	0.108052	0.153392	0.0788858	0.0242605	0.110448	0.0202289	-0.000508414	0.0836249	0.119531	-0.00892632	-0.00965175	0.0580304	-0.0301468	-0.0516444	0.113398
HIKESHI	blue	blue	0.153287	0.147134	0.105002	0.0588928	0.132593	0.0456045	0.083811	0.111313	0.103382	0.0413421	-0.00248949	0.0428246	-0.00941987	-0.0330723	0.0953949
GPR137	blue	blue	0.0870746	0.131263	0.0370179	0.0240426	0.0942806	0.00326452	-0.0330477	0.0250196	0.102151	-0.0364667	0.0209024	0.0443856	-0.0281246	-0.0232245	0.0974028
ZNF426	blue	blue	0.0673742	0.0890737	-0.00929669	0.0186517	0.0853665	0.00184433	-0.0345657	0.0480214	0.0878997	-0.0369005	0.0955975	0.0715764	0.00808394	0.00360161	0.0931174
PCYT2	blue	blue	0.115256	0.135274	0.116126	0.0563421	0.0724533	0.0192367	0.0155108	0.0542768	0.0708844	0.0443321	-0.0334898	0.00208384	-0.0168055	-0.0209501	0.114059
C7orf50	blue	blue	0.17771	0.245372	0.0168975	0.0335763	0.260743	0.00867264	0.0331172	0.170821	0.187362	-0.0725661	0.103242	0.0802464	-0.0292806	-0.037832	0.186528
VTI1B	blue	blue	0.127784	0.147203	0.0537726	0.0280448	0.119845	0.0307368	0.0140899	0.0878899	0.12892	-0.0294069	0.0258681	0.0772306	-0.0187769	-0.0347298	0.114757
PYGB	blue	blue	0.118736	0.142373	0.162054	0.0696037	0.0388833	0.0288181	0.00583378	0.0255704	0.0651316	0.074228	-0.0819013	-0.0062305	-0.00858416	-0.0207436	0.14506
ASB2	blue	blue	0.121199	0.219084	0.124637	0.0518278	0.0951322	0.016913	-0.0758185	0.0210802	0.140306	-0.00854196	-0.03303	0.0271746	-0.0540934	-0.040055	0.197306
DSC3	blue	blue	0.260148	0.407938	0.258105	0.117476	0.133207	0.0645094	-0.0424087	0.110021	0.320066	-0.100545	-0.170582	0.134691	-0.142845	-0.122539	0.319049
MRS2	blue	blue	0.0755866	0.0971984	0.0577455	0.0399854	0.0501688	0.0234269	-0.00419269	0.0273229	0.0627535	-0.00365996	-0.00764189	0.0206826	-0.00980523	-0.0148558	0.0716202
TMTC3	blue	blue	0.130299	0.196584	0.207115	0.0560457	0.0651732	0.0241806	-0.0217965	0.0353577	0.112124	0.0796141	-0.10284	0.0134944	-0.0318041	-0.0851992	0.160966
MGMT	blue	blue	0.129219	0.133552	0.0735454	0.0727613	0.105945	0.0372519	0.0531488	0.0893749	0.0723851	0.04444	0.00186169	0.0117906	0.0110662	0.0101685	0.126564
HINT2	blue	blue	0.17049	0.204692	0.0488496	0.0495758	0.16655	0.018338	0.0464088	0.0977448	0.150754	-0.0453058	0.0537979	0.0609949	-0.0214948	0.0199986	0.183764
SURF1	blue	blue	0.136142	0.171228	0.0555934	0.0606086	0.109152	0.0417976	-0.00328116	0.0613064	0.121062	-0.0373844	0.018131	0.0484435	-0.0200616	0.00283225	0.137989
ATPAF1	blue	blue	0.121151	0.14633	0.0585156	0.0589621	0.0781038	0.0184524	-0.00791133	0.0233864	0.0944617	-0.0192166	0.00842981	0.0343628	0.00251421	0.0120571	0.13896
RAB6A	blue	blue	0.113925	0.106208	0.0818106	0.0600878	0.0612557	0.00646415	0.00184147	0.034808	0.0745125	0.0447821	0.000245659	0.0245873	-0.0104082	-0.00778623	0.0969439
C6orf136	blue	blue	0.0914265	0.100231	0.0601623	0.0491203	0.0496877	0.0175235	-0.00266425	0.0285163	0.0625136	-0.00499963	0.00247372	0.0209545	-0.00747221	0.0159549	0.102972
ENSMFAG00000033395	blue	blue	0.110195	0.14257	0.100926	0.0679655	0.0365679	0.0512444	-0.0025438	0.0262526	0.0811344	-0.00806316	-0.0468728	0.0141081	-0.00899881	-0.0117418	0.138719
ARL8A	blue	blue	0.101113	0.121175	0.0539641	0.0377333	0.0718608	0.0186588	-0.00911366	0.0330165	0.0994603	-0.0264092	0.00933438	0.0524103	-0.0162938	-0.00776914	0.107965
IBTK	blue	blue	0.093279	0.110117	-0.00485291	0.0021342	0.147755	-0.00492487	-0.0518246	0.0651393	0.130361	-0.0370059	0.155407	0.117073	-0.0107268	-0.036204	0.0674622
ATRAID	blue	blue	0.135712	0.15721	0.0599492	0.0682499	0.0905984	0.0230687	-0.0178947	0.0341769	0.0988673	-0.0149416	0.0432428	0.0313362	0.000502551	0.0318507	0.16024
PIGF	blue	blue	0.123309	0.139599	0.071	0.0561709	0.0882199	0.0235294	0.0137342	0.0627719	0.0882223	0.00261975	-0.0020235	0.0293769	-0.0125675	0.009414	0.117064
CUL4B	blue	blue	0.132669	0.189482	0.11645	0.0183839	0.134875	0.00331408	-0.0358415	0.0669279	0.154815	0.000577695	0.00841056	0.071869	-0.052945	-0.0675473	0.141655
ECI1	blue	blue	0.117837	0.157176	0.0545463	0.0292916	0.141582	0.0112184	0.0025663	0.0943134	0.129031	-0.0295509	0.0341962	0.0604949	-0.030542	-0.0494112	0.120264
PPCS	blue	blue	0.129629	0.179715	0.049181	0.00413705	0.179168	-0.00782387	0.000415575	0.0950217	0.156086	-0.04131	0.0550848	0.0755719	-0.0478143	-0.0705424	0.121344
ECH1	blue	blue	0.110722	0.169104	0.0221568	0.0152139	0.15119	-0.0218147	0.00391316	0.0692853	0.121746	-0.0408652	0.0643694	0.0283185	-0.0240898	0.0186149	0.14721
RBBP4	blue	blue	0.116507	0.113809	0.0829404	0.0765851	0.0508694	0.0458902	0.0229732	0.05029	0.0597207	0.0221355	-0.0111532	0.0170128	0.0232953	0.0161953	0.107115
EVA1A	blue	blue	0.0893386	0.106667	0.040313	0.0516222	0.0922573	-0.000821656	0.0578261	0.0689934	0.0390273	0.0626803	0.0111753	-0.0155537	0.0141997	0.018769	0.131393
KMT2C	blue	blue	0.116174	0.134905	0.106194	0.094355	0.0192544	0.0250637	-0.0423701	0.00910179	0.083709	0.0262857	-0.01833	0.0407257	-0.00903253	0.032142	0.160164
ENSMFAG00000043452	blue	blue	0.121966	0.143671	0.0846298	0.0312601	0.105887	0.0323133	-0.0140003	0.0684183	0.106586	0.0224163	0.011813	0.0431053	-0.00596519	-0.0410017	0.121581
ADRB2	blue	blue	0.164953	0.252883	0.0927516	0.112243	0.0437323	0.0198048	-0.0515327	-0.00865289	0.157688	-0.104988	-0.0674967	0.0200069	-0.0539969	0.0872277	0.284602
NMRK1	blue	blue	0.154537	0.185398	0.0542895	0.0386583	0.127818	0.0317316	0.0285002	0.106039	0.158899	-0.0611504	-0.0166124	0.0893651	-0.0555004	-0.0439741	0.121548
TBCB	blue	blue	0.129551	0.108347	0.0757256	0.0635164	0.101369	0.0340197	0.0707484	0.0865406	0.0541709	0.081509	0.0174208	0.00623102	0.0166486	0.00289593	0.0833834
SNX18	blue	blue	0.101151	0.160667	0.0310013	0.0261033	0.138653	0.0201357	-0.0490555	0.0705313	0.128478	-0.0567517	0.065588	0.0642632	-0.03386	-0.0350849	0.116817
PRKCZ	blue	blue	0.0921609	0.13062	0.0586466	0.0252397	0.0983508	0.0117804	-0.0392132	0.0483544	0.120079	-0.0250754	0.0192378	0.0622147	-0.0338078	-0.04667	0.101155
ARHGAP35	blue	blue	0.0794728	0.0979263	0.0566939	0.0278356	0.0550795	-0.0111332	-0.0110362	0.0184907	0.0580136	0.0200668	-0.00417152	0.0170248	-0.0126914	-0.00462275	0.0970588
NDUFS1	blue	blue	0.115386	0.12245	0.0747127	0.0564464	0.083912	0.0286147	0.00660488	0.0453558	0.0834812	0.0103767	-0.00427891	0.0325661	-0.0169454	-0.0254085	0.0918937
EFR3A	blue	blue	0.120386	0.151299	0.0185661	-0.00305734	0.167554	-0.00920129	-0.0308125	0.099378	0.14589	-0.0247368	0.098723	0.106651	-0.0207254	-0.0534419	0.0877462
SPG7	blue	blue	0.0926961	0.107393	0.0752719	0.0489223	0.0552328	0.019925	-0.00967742	0.033596	0.0532823	0.0251492	-0.0023067	0.00509513	0.00426114	0.0121473	0.105018
LRP11	blue	blue	0.0817865	0.142874	0.0874526	-0.0176565	0.127314	-0.020477	-0.0707418	0.0555672	0.125799	0.0326354	0.0011269	0.0547816	-0.0565552	-0.101001	0.068985
MICOS10	blue	blue	0.235967	0.251223	0.127963	0.0717504	0.24464	0.0699584	0.0787328	0.206279	0.193954	0.0249503	0.0328837	0.105823	-0.00468739	-0.0680902	0.16662
RETSAT	blue	blue	0.0680426	0.0982364	0.0324937	0.0411342	0.0452548	-0.0233607	-0.0163044	0.00983905	0.0441501	-0.00134279	0.00545159	-0.0170944	-0.0139201	0.0303746	0.114749
PPFIA1	blue	blue	0.105056	0.113007	0.0878717	0.078602	0.0303327	0.0565594	-0.047289	0.019095	0.0956401	0.00731241	-0.0174035	0.0774182	-0.0031781	-0.0219453	0.0990353
ENSMFAG00000038822	blue	blue	0.140472	0.157433	0.116809	0.0462266	0.113455	0.0467161	0.0179663	0.096947	0.121714	0.0337931	-0.0157559	0.0653481	-0.0145992	-0.0452872	0.126742
FRMD4B	blue	blue	0.121421	0.192644	0.0802694	0.0619333	0.104382	-0.010114	-0.0829453	0.0232171	0.146741	-0.00807932	0.0684695	0.0911833	-0.025059	-0.000908054	0.197296
TKFC	blue	blue	0.0827112	0.0995459	0.0829865	0.0494112	0.0310393	0.0309673	-0.0130857	0.0162151	0.0614559	0.0156303	-0.0274584	0.0271074	0.00527829	-0.00522766	0.0890963
EXOC3	blue	blue	0.106486	0.134647	0.0479309	0.051649	0.0649971	0.00987521	0.00585322	0.0287206	0.0766788	-0.0120823	-0.0098252	0.0154749	-0.0143415	0.0112847	0.121935
CCNDBP1	blue	blue	0.0846266	0.11514	0.0357001	0.0252074	0.0808966	-0.0182701	-0.0140845	0.0367436	0.0849533	-0.0227902	0.0349684	0.0311158	-0.0244903	0.00763099	0.0976504
CD82	blue	blue	0.175271	0.291027	0.0974554	0.00636956	0.234686	-0.0115115	-0.120767	0.105571	0.267041	-0.0723301	0.074429	0.141949	-0.0943913	-0.117511	0.197973
ARID1A	blue	blue	0.132737	0.143186	0.0537317	0.0912222	0.0914291	0.0221118	-0.0349161	0.0403889	0.10036	-0.0021952	0.0541154	0.0529029	0.00742645	0.034128	0.14122
C18orf32	blue	blue	0.188484	0.216519	0.104471	0.059697	0.161441	0.0395374	-0.0105093	0.0891873	0.180772	-0.010116	0.0440309	0.101014	-0.0435501	-0.039289	0.169165
NDUFA7	blue	blue	0.217842	0.231708	0.125784	0.0745375	0.200026	0.0434866	0.0556664	0.16535	0.182518	0.0147477	0.0511613	0.0992307	-0.0163188	-0.0411145	0.193561
BECN1	blue	blue	0.105327	0.121615	0.0535255	0.0426621	0.090321	0.0322968	-0.00126771	0.0653188	0.0939366	0.0086158	0.0211622	0.0482963	-0.000559647	-0.0260467	0.0969759
MPC2	blue	blue	0.218561	0.21077	0.128813	0.109848	0.156643	0.0836141	0.0823392	0.144502	0.138683	0.0349903	-0.0145939	0.0592493	0.0172172	-0.00670575	0.179588
KLF3	blue	blue	0.221243	0.305785	0.114976	0.0969611	0.175167	0.082066	-0.0724303	0.130754	0.271349	-0.113721	0.0470329	0.175533	-0.0557395	-0.0568008	0.247539
SERTAD3	blue	blue	0.153168	0.174015	0.0599696	0.0722008	0.129815	0.0667415	-0.00225255	0.104062	0.149616	-0.0288613	0.0521599	0.106205	0.0185011	-0.00859913	0.146966
HIBCH	blue	blue	0.110563	0.167846	0.0068166	0.0649109	0.104257	0.0047692	-0.0223582	0.027253	0.105369	-0.0838114	0.0481281	0.018692	-0.0319373	0.052848	0.159176
TRIM26	blue	blue	0.0843427	0.108684	0.0272725	0.0270079	0.0706565	0.0226657	-0.0344253	0.0371465	0.102406	-0.0507465	0.0362272	0.0794989	-0.00892117	-0.0277191	0.0856786
ITM2B	blue	blue	0.205195	0.259778	0.0156506	0.0139492	0.331688	-0.08758	0.030685	0.143072	0.217834	-0.0598117	0.254586	0.10586	-0.0769673	0.0400515	0.240332
URM1	blue	blue	0.0735464	0.0791117	0.0386896	0.0253151	0.0796691	0.00703447	0.035648	0.064017	0.0534417	0.00591588	0.011356	0.0123743	-0.0243028	-0.00298039	0.0622988
HAGH	blue	blue	0.120098	0.176122	0.0514521	0.0250563	0.11519	-0.0157186	-0.0216567	0.0434358	0.113122	-0.039032	0.0358282	0.0368636	-0.0282693	0.00693271	0.16085
EML3	blue	blue	0.0959901	0.115927	0.010474	0.014228	0.116854	0.0180408	-0.00499524	0.0738091	0.110116	-0.0412076	0.0721029	0.0819163	-0.00751404	-0.0166815	0.085503
TRAPPC12	blue	blue	0.0887317	0.110369	0.0500193	0.0382753	0.0853352	0.0262219	-0.00624515	0.0464441	0.0831897	0.013726	0.0137291	0.0443828	-0.00750331	-0.0250164	0.0967285
DEDD2	blue	blue	0.0755811	0.0827389	0.0149486	0.0486558	0.0904865	0.00875605	0.0042155	0.0454557	0.0644639	0.0061703	0.0478787	0.0441474	0.00480971	0.0147994	0.0815804
CAB39L	blue	blue	0.128133	0.215694	0.0198471	0.0317137	0.132919	0.00788954	-0.0956032	0.0506057	0.195734	-0.124534	0.0597784	0.105668	-0.0625867	-0.0484787	0.148696
TDRD3	blue	blue	0.0690173	0.0648291	0.0419761	0.0578821	0.0336187	0.01316	0.00727306	0.0179624	0.0227676	0.0346232	-0.00423084	-0.0112651	0.0196768	0.0272247	0.0831926
VSIR	blue	blue	0.186015	0.292108	0.136753	0.0258623	0.20324	0.0203885	-0.0477695	0.112228	0.244004	-0.0685416	-0.00378039	0.100001	-0.10369	-0.114076	0.183618
LYPD6B	blue	blue	0.259981	0.376003	0.362089	0.0911544	0.1656	0.0737909	-0.0497006	0.110322	0.255123	0.09225	-0.150822	0.0684513	-0.0921949	-0.166061	0.289638
ZCCHC2	blue	blue	0.0605144	0.0698526	0.0682067	0.0501937	0.00948609	0.0108573	-0.0399922	0.00285367	0.0521361	0.025622	-0.00401965	0.0392405	-0.00220936	0.000579463	0.064546
ATP6V1H	blue	blue	0.115816	0.162582	0.0437815	0.0252975	0.141437	-0.0116849	-0.0547234	0.0578112	0.133045	-0.0297591	0.0765922	0.0579338	-0.0363445	-0.028739	0.128947
NDUFS7	blue	blue	0.149418	0.162777	0.0295768	0.0421329	0.175494	0.0267164	0.0463679	0.121839	0.111308	-0.0334469	0.0620329	0.0509358	-0.0141066	-0.0153607	0.116859
SLC35D1	blue	blue	0.181655	0.271061	0.157465	0.0765413	0.135371	0.0499443	-0.0727066	0.0610634	0.195851	0.00324402	-0.0177827	0.0801209	-0.0367398	-0.0756183	0.209021
ENSMFAG00000035374	blue	blue	0.1539	0.175407	0.0733935	0.0320411	0.161666	0.0269995	0.0458446	0.126273	0.146139	-6.59139e-05	0.0287887	0.0777883	-0.0216866	-0.0528699	0.117698
SMARCE1	blue	blue	0.157754	0.15343	0.0632168	0.0616083	0.14532	0.0334279	0.0416289	0.116337	0.116675	0.0249573	0.0294604	0.0658743	0.00524001	-0.00719079	0.131016
BCKDHA	blue	blue	0.125865	0.176954	0.0597994	0.0499232	0.108597	-0.00210621	-0.0221197	0.0284727	0.107338	-0.0256799	0.0316577	0.0270784	-0.0236634	0.0112754	0.158142
SERINC5	blue	blue	0.179144	0.22985	0.0608351	0.0520139	0.187121	0.024531	-0.0690474	0.106344	0.226454	-0.0712896	0.0959651	0.159351	-0.044034	-0.0402527	0.181871
SUMF1	blue	blue	0.0692906	0.0963878	0.0321999	0.0179714	0.0886321	-0.00886805	-0.00942229	0.0343304	0.0674504	0.00325577	0.0454013	0.0218173	-0.0135391	-0.00345694	0.082386
PGD	blue	blue	0.258315	0.350492	0.180497	0.0542642	0.251755	0.027335	-0.115919	0.120096	0.330378	-0.0662732	0.115571	0.227998	-0.113488	-0.0890674	0.26748
COPG2	blue	blue	0.0783089	0.0916949	0.0340928	0.0346079	0.0821807	0.009738	0.013966	0.050971	0.062657	0.000317082	0.0330105	0.0272307	-0.00472944	0.00229363	0.0852105
FRMD4A	blue	blue	0.0971418	0.155339	0.18536	0.0655756	-0.019278	0.014073	-0.0368743	-0.0333539	0.0687116	0.0347035	-0.122508	-0.0201546	-0.0687224	-0.01978	0.163327
CNKSR3	blue	blue	0.112787	0.185908	0.13685	0.0918462	0.0197075	0.0283733	-0.053262	-0.0255681	0.0845953	0.0161251	-0.0655771	-0.0140622	-0.0219103	0.00621637	0.220489
DAZAP2	blue	blue	0.131419	0.160117	0.0208215	0.0515817	0.136103	0.00846877	-0.0517211	0.0646685	0.141899	-0.0567402	0.118334	0.102688	-0.0122532	-0.00410169	0.142152
SMARCA4	blue	blue	0.133033	0.171148	0.0141358	0.0155853	0.197135	0.000624874	-0.0604318	0.116041	0.165136	-0.0204336	0.143733	0.119534	-0.024969	-0.0661057	0.114507
PIGA	blue	blue	0.0903386	0.133431	0.0480809	0.0367477	0.0890482	0.0233257	-0.0551853	0.0659355	0.121031	-0.0335268	0.0455023	0.0904798	-0.0134541	-0.0309906	0.114891
SMIM19	blue	blue	0.174071	0.206531	0.0856727	0.0635228	0.156143	0.033686	0.0414409	0.113758	0.144726	0.0017987	0.0271431	0.0589289	-0.0148511	-0.0120201	0.159438
CYBRD1	blue	blue	0.0843749	0.113925	0.173471	0.0508373	-0.0206698	0.0160952	-0.0476096	-0.0355066	0.0572937	0.0788204	-0.0962739	-0.0104175	-0.0355322	-0.0437174	0.123582
ENSMFAG00000045821	blue	blue	0.104228	0.15002	0.0994951	0.0355365	0.0739874	0.0323535	-0.0431738	0.0510503	0.117222	-0.00496022	-0.0360543	0.0536554	-0.0362334	-0.0588512	0.10856
ENSMFAG00000031971	blue	blue	0.134812	0.192174	0.12558	0.0487924	0.107239	0.0154205	-0.0427338	0.0472247	0.151144	0.00660531	-0.0333384	0.0626444	-0.0614818	-0.0757674	0.137121
RAB27B	blue	blue	0.0597058	0.0923836	-0.0400706	-0.0124411	0.122401	-0.0293685	-0.0127681	0.0641807	0.0840817	-0.0629852	0.0896781	0.0500187	-0.0294462	0.0136425	0.0749154
ARFGEF2	blue	blue	0.0709385	0.0790804	0.0351419	0.0247424	0.0516555	0.0104969	-0.0245706	0.0179396	0.0555197	-0.000103508	0.0181508	0.0265297	-0.0133809	-0.00990793	0.0634498
ERBB2	blue	blue	0.125294	0.216992	0.0195022	0.0124032	0.185309	-0.038941	-0.115758	0.0601443	0.187771	-0.0782697	0.134199	0.091428	-0.0568019	-0.042886	0.164237
RAP1A	blue	blue	0.137435	0.148025	0.0139627	0.0283734	0.18181	0.0265249	-0.00146706	0.119645	0.160643	-0.0356173	0.135864	0.14139	0.0103692	-0.0423906	0.10041
STAU2	blue	blue	0.0531383	0.0798194	0.0239764	0.032923	0.0441441	0.00662378	-0.00803602	0.0365276	0.0643573	-0.0220024	0.0145593	0.0459514	-0.0126928	-0.00474441	0.0722652
MFSD5	blue	blue	0.0869444	0.137303	-0.0210325	-0.0109485	0.167536	-0.0200841	-0.0539542	0.0708131	0.136714	-0.0856953	0.127566	0.0891447	-0.0291694	-0.0353106	0.0802218
ARF5	blue	blue	0.165564	0.178657	0.0921736	0.0411413	0.171064	0.0242369	0.0419949	0.123717	0.133926	0.04302	0.0203255	0.0597483	-0.0187946	-0.0328668	0.130058
SNX27	blue	blue	0.0871195	0.117038	0.0804648	0.0414795	0.0390388	0.0227263	-0.0182843	0.0360017	0.0812861	0.0086423	-0.0030991	0.0442499	-0.0107595	-0.00255053	0.115921
ENSMFAG00000003998	blue	blue	0.184029	0.262094	0.118774	0.0763308	0.135838	0.0690309	-0.0857914	0.0880669	0.232777	-0.0767625	-0.00867086	0.135288	-0.0786335	-0.0792102	0.18718
LRATD2	blue	blue	0.0517437	0.0783251	-0.0441501	0.0177605	0.0883644	0.00887336	-0.0316868	0.0433465	0.0875586	-0.0829783	0.101328	0.0699039	-0.00840818	0.00588366	0.0664088
ACAD11	blue	blue	0.0649015	0.0935782	0.0904554	0.0257863	0.0338459	-0.00807549	-0.0344695	0.00984513	0.0649643	0.0208008	-0.0243015	0.0197221	-0.0322366	-0.0266144	0.0719471
ZNF44	blue	blue	0.0647125	0.110605	0.0279362	0.00769718	0.065408	-0.0117822	-0.0375142	0.0206466	0.103594	-0.055106	-0.0025752	0.0510944	-0.0468633	-0.0400814	0.0601112
GPN1	blue	blue	0.118401	0.134054	0.0766425	0.0698225	0.0725541	0.0560656	0.0190118	0.0671984	0.103376	-0.0208964	-0.0224845	0.0596503	-0.000979797	-0.0215785	0.109315
TRAPPC6A	blue	blue	0.119116	0.1022	0.0807119	0.061663	0.0773198	0.0303261	0.0500066	0.0749107	0.0497228	0.0540412	0.00155435	0.0153694	0.00260971	0.00351004	0.0869956
ENSMFAG00000041821	blue	blue	0.169312	0.193834	0.116992	0.0495938	0.160896	0.0435932	0.0634095	0.147101	0.143864	0.030425	-0.0020259	0.0812873	-0.0189911	-0.0647801	0.130967
PLA2G4F	blue	blue	0.124869	0.229309	0.148022	0.0323682	0.108812	0.0252111	-0.0365833	0.0702495	0.17676	-0.0430735	-0.0784272	0.0731014	-0.0850842	-0.118837	0.154487
TST	blue	blue	0.113584	0.179017	-0.0262457	-0.000418272	0.212706	-0.0188068	-0.0264807	0.0995032	0.158664	-0.0850809	0.191973	0.105439	-0.033706	-0.0201083	0.133445
ZC3H7A	blue	blue	0.088526	0.105009	0.0930879	0.0466108	0.0375139	0.0119628	-0.0214179	0.0120981	0.0666621	0.0402459	-0.0154685	0.0258039	-0.0152403	-0.0109693	0.0881309
NADK	blue	blue	0.09676	0.133371	0.0224017	0.0100537	0.109339	0.0191863	-0.0363908	0.0629042	0.135336	-0.0728542	0.0526051	0.0921537	-0.034461	-0.0481033	0.0886207
MTMR10	blue	blue	0.0700675	0.100146	0.0690315	0.0583476	0.0138293	0.0064685	-0.0196774	-0.010174	0.0419267	0.00593984	-0.0399899	-0.0142214	-0.0180416	0.0118915	0.0987424
CDC73	blue	blue	0.115191	0.12171	0.0623794	0.0595279	0.0824561	0.0415151	-0.00174523	0.0616641	0.099172	0.00132049	0.0194936	0.0644551	0.00595465	-0.0120539	0.0894859
BMT2	blue	blue	0.103831	0.135722	0.0331416	0.0378875	0.135463	-0.00924317	-0.0170147	0.0730167	0.115176	-0.00889449	0.0599311	0.0585965	-0.0194654	-0.0206336	0.0984714
GPS1	blue	blue	0.111152	0.132527	0.071186	0.0445285	0.101507	0.00679148	0.00541201	0.0675197	0.0878457	0.0121799	0.0146824	0.0215096	-0.0128147	-0.0145663	0.105698
SGMS1	blue	blue	0.0889447	0.113833	-0.0236081	0.00885806	0.144816	-0.0190061	-0.0423994	0.0666216	0.119687	-0.0402304	0.158124	0.0976606	0.00341556	-0.0170175	0.0852221
ANTKMT	blue	blue	0.155105	0.199582	0.0880563	0.0319701	0.173339	0.0319114	-0.0119819	0.121115	0.16644	-0.0166569	0.0420142	0.0849196	-0.0474448	-0.0640661	0.123103
AP2A2	blue	blue	0.0926354	0.12431	-0.0127814	0.0108599	0.169919	-0.000980112	-0.0253809	0.0800694	0.112624	-0.0303321	0.12622	0.0681422	-0.00200311	-0.0235287	0.0817344
PET100	blue	blue	0.116922	0.144946	0.0133315	0.0346164	0.168187	0.00267927	0.00181323	0.0985252	0.114793	-0.0121893	0.102404	0.0624258	-0.00426262	-0.0154864	0.119435
BCKDHB	blue	blue	0.0973061	0.144449	0.0351519	0.0245466	0.1235	-0.0158854	-0.0213649	0.0482316	0.0951059	-0.000894024	0.0648156	0.0354777	-0.0260193	-0.0101985	0.107923
ENSMFAG00000018170	blue	blue	0.0668666	0.0738876	0.107675	0.00488902	0.0310341	-0.00166912	0.00552269	0.00947476	0.0518219	0.0543533	-0.00536949	0.0238472	-0.0153252	-0.0372507	0.0763676
SDSL	blue	blue	0.103786	0.148168	0.106815	0.0233265	0.0884339	0.0251011	-0.0054553	0.0625648	0.116952	0.0148127	-0.0153468	0.0512513	-0.0355486	-0.0750637	0.0985866
POLDIP2	blue	blue	0.124045	0.146685	0.0589658	0.0295514	0.105514	0.0515914	0.00017995	0.09002	0.123974	-0.0239716	0.0192084	0.0727132	-0.00516636	-0.0476023	0.0882173
ENSMFAG00000040877	blue	blue	0.0723818	0.0953788	0.0406506	0.016969	0.065655	0.0243866	-0.00907256	0.0362235	0.0753866	-0.0116607	-0.00765846	0.0326744	-0.0117642	-0.0147558	0.0677159
HSD17B4	blue	blue	0.0898822	0.136991	-0.0201465	0.00739891	0.159304	-0.0324473	-0.0183247	0.0673177	0.112741	-0.0612396	0.139488	0.0613581	-0.022815	-0.00112457	0.11943
PSMC5	blue	blue	0.200221	0.204431	0.0746279	0.101458	0.161651	0.0928366	0.0560497	0.13875	0.169264	-0.048129	0.030674	0.114294	-0.0165741	-0.00414514	0.162832
CORO2A	blue	blue	0.116021	0.141705	0.0138475	0.023313	0.147592	0.0128758	-0.067147	0.0742611	0.136127	-0.0298829	0.12759	0.105101	-0.0160098	-0.0297203	0.099674
C1GALT1C1	blue	blue	0.100822	0.141255	0.0603068	0.00827151	0.112513	0.0127065	-0.0380303	0.0730724	0.124449	-0.0374671	0.0423286	0.0741254	-0.0460953	-0.0482525	0.0905017
RCC2	blue	blue	0.122116	0.137805	0.054021	0.0520667	0.112404	0.0437533	-0.0253236	0.0733839	0.122034	-0.00449887	0.0601386	0.0927314	0.0276592	-0.0421849	0.116845
GBF1	blue	blue	0.0831272	0.0935572	0.0600664	0.0430236	0.0568491	0.0349707	-0.0158363	0.046268	0.0652166	0.0121571	0.0139914	0.0462665	0.00840558	0.0077504	0.0851294
FBXL12	blue	blue	0.0640462	0.0940161	-0.0158914	0.0220884	0.0841032	0.0357295	-0.0392499	0.0504952	0.100377	-0.0743513	0.0897486	0.0949111	0.0171987	0.00309833	0.0889982
ARHGEF3	blue	blue	0.183762	0.286752	0.204927	0.0876792	0.095316	0.0135768	-0.0953833	0.00974031	0.175323	0.0031754	-0.0477614	0.0421231	-0.0701865	-0.0294519	0.262976
ENSMFAG00000030006	blue	blue	0.147916	0.24536	0.0976353	0.0424547	0.124723	0.0388493	-0.0613147	0.0555838	0.184628	-0.0629592	-0.00281038	0.080794	-0.0393207	-0.0473254	0.177682
VPS37C	blue	blue	0.113652	0.169719	0.0405113	0.0170619	0.1056	0.0162429	-0.0534085	0.0553034	0.158751	-0.078218	0.0282846	0.0947727	-0.0520505	-0.0454296	0.122555
RAB3GAP2	blue	blue	0.0925185	0.0994077	0.0746689	0.0550651	0.0437197	0.0215289	-0.0194083	0.0294208	0.062958	0.0288638	-0.00295121	0.0366125	-0.00408172	-0.00251171	0.102804
MYCBP2	blue	blue	0.157937	0.255376	0.0308098	0.08082	0.124334	-0.0145307	-0.065953	0.0056824	0.171721	-0.125761	0.0306016	0.03326	-0.0781537	0.0421573	0.238719
GPR157	blue	blue	0.0691587	0.138662	0.0788609	0.00548871	0.101099	-0.0118236	-0.00729855	0.0370395	0.0962998	-0.00381593	-0.0232771	0.0136397	-0.0495048	-0.0375965	0.105571
ENSMFAG00000035818	blue	blue	0.0943155	0.116433	0.0779104	0.0381561	0.0591145	0.0177003	-0.00256257	0.033187	0.0852998	0.00571664	-0.0150935	0.0418162	-0.0246325	-0.0156814	0.113559
SUPT7L	blue	blue	0.0707083	0.0724093	0.0354753	0.0305231	0.0468368	0.0236802	0.0119356	0.0318955	0.0639895	-0.0109997	0.000387403	0.0291351	-0.00510608	-0.0116361	0.0590396
CDC42BPG	blue	blue	0.11825	0.170194	0.0601691	0.0625586	0.0884872	-0.00473892	-0.0453175	0.0242447	0.113545	-0.0150868	0.0352318	0.0411447	-0.026081	0.0106739	0.166442
LMNB1	blue	blue	0.177304	0.20949	0.153245	0.103646	0.0870165	0.100004	-0.0190924	0.0849235	0.124452	0.0263216	-0.0716383	0.0430728	0.0111986	-0.0471539	0.169703
PDXK	blue	blue	0.0931046	0.102774	0.0264614	-0.00085069	0.14456	0.00886363	-0.00268191	0.103105	0.106087	0.00748165	0.0916618	0.0874704	-0.0042848	-0.0535896	0.0638842
ZDHHC4	blue	blue	0.0990393	0.164221	0.0363126	-0.00155816	0.155372	-0.0152058	-0.018114	0.0887057	0.137984	-0.0208809	0.0432577	0.0658745	-0.0457708	-0.0576201	0.0979579
PDCD6	blue	blue	0.210824	0.227304	0.152112	0.0560596	0.183373	0.0638151	0.0335903	0.151933	0.193389	0.0264909	-0.00683362	0.113149	-0.0382015	-0.0647952	0.147399
PRKAG2	blue	blue	0.0924461	0.136716	0.0332323	0.0563801	0.0765682	0.0165749	-0.0414781	0.0146862	0.0806825	-0.0244342	0.0565075	0.0347253	0.027247	0.0099276	0.138525
STK16	blue	blue	0.130726	0.166782	0.0647224	0.0413688	0.133773	0.0124843	0.00458504	0.0775298	0.113928	0.00111626	0.00764226	0.040887	-0.0122319	-0.00953486	0.123981
SRD5A1	blue	blue	0.11052	0.141946	0.115718	0.0241516	0.111288	0.0179557	-0.0126426	0.069067	0.128681	0.0306732	-0.0211441	0.0609377	-0.0421275	-0.0669293	0.0983389
MAEA	blue	blue	0.0988493	0.123259	0.0665291	0.0217231	0.0986659	0.00418122	-0.0126766	0.061337	0.0812705	0.0265486	0.0116809	0.0343898	-0.0174642	-0.028385	0.0892934
IPO13	blue	blue	0.0761459	0.0848164	0.0650594	0.049726	0.0394363	0.0227022	-0.0101165	0.0189556	0.0546066	0.0161954	-0.011057	0.0294103	-0.0111906	-0.0104949	0.0699574
GTF3C1	blue	blue	0.104363	0.153401	0.0806486	0.029823	0.0964819	0.00497318	-0.0198086	0.0568491	0.126903	-0.0170678	-0.0351845	0.0572343	-0.074093	-0.0442042	0.0929342
TNNI2	blue	blue	0.163922	0.269777	0.228606	0.0834249	0.0913256	0.0483641	-0.117137	0.0337573	0.177689	0.0503476	-0.0677143	0.0503603	-0.0457296	-0.0961257	0.22673
SNAP23	blue	blue	0.105262	0.117116	0.0416385	0.0242051	0.0983523	0.0154135	0.00197771	0.063375	0.111207	-0.0109318	0.0302664	0.0664497	-0.0270065	-0.0341448	0.087274
SRP68	blue	blue	0.128337	0.145412	0.113696	0.0507663	0.0858238	0.054406	0.0288453	0.0820516	0.104942	0.0399783	-0.0423832	0.0542639	-0.0124024	-0.0496337	0.0962306
PIH1D1	blue	blue	0.114271	0.117607	0.057482	0.0448914	0.0857627	0.0357318	0.00809866	0.063304	0.0809131	0.0198917	0.00393381	0.0420572	-0.00612078	-0.0217733	0.0916185
PDP1	blue	blue	0.0717979	0.0783795	0.0586979	0.0172701	0.0519269	-0.00614299	-0.0213369	0.024892	0.0543084	0.0293479	0.0228647	0.0340944	-0.0127276	-0.00503089	0.0750559
ACBD6	blue	blue	0.0869246	0.105972	0.0708616	0.0242625	0.0827164	0.00813058	0.0126634	0.0584012	0.0604724	0.0225012	-0.000742191	0.00406659	-0.0178455	-0.0208397	0.0888002
ZNF385A	blue	blue	0.0945081	0.0924211	0.0485248	0.055029	0.0599094	0.00102199	0.0517261	0.0472631	0.0399594	0.0212922	0.0372526	0.00329707	0.0248033	0.047058	0.12106
FYCO1	blue	blue	0.0630176	0.0932276	0.0429073	0.017556	0.0495197	-0.00099732	-0.0261239	0.0192044	0.0710264	-0.00734212	0.0121552	0.0293689	-0.0260908	-0.0137921	0.0652128
C1orf122	blue	blue	0.138595	0.152251	0.115694	0.0616555	0.092861	0.0494069	0.0513074	0.0847164	0.0922923	0.051851	-0.0289126	0.0285199	0.0067212	-0.0172122	0.133758
HEATR5A	blue	blue	0.0639555	0.0740826	0.0398439	0.0413165	0.0449342	0.0187543	-0.0107252	0.0293376	0.0453222	0.0157772	0.00402685	0.0253647	0.0068188	-0.00402867	0.0582152
MYCL	blue	blue	0.156281	0.259953	0.078692	0.0535405	0.148376	0.0208438	-0.0733208	0.05418	0.18909	-0.0736379	0.0257993	0.0665205	-0.0433675	-0.0268112	0.227948
OSBP	blue	blue	0.102968	0.122632	0.0764385	0.0735513	0.0395009	0.0465871	-0.0292348	0.0314217	0.0849623	-0.000395946	-0.00064619	0.0565299	0.0140466	0.000314596	0.11329
NDUFS8	blue	blue	0.206675	0.216643	0.10497	0.0604117	0.208612	0.0469671	0.0648468	0.166343	0.166644	0.0112148	0.0543351	0.0819967	-0.0154296	-0.0384664	0.15846
JOSD1	blue	blue	0.0655317	0.0780413	-0.00318703	0.0576968	0.049525	0.0127822	0.000752592	0.0202368	0.0382851	-0.0151604	0.0354121	0.0096936	0.012172	0.0388725	0.0977469
SRP9	blue	blue	0.198352	0.194911	0.0597606	0.0625394	0.207075	0.0653095	0.0750763	0.18024	0.169432	0.0012122	0.0629331	0.10623	0.00883621	-0.0429289	0.128315
NCEH1	blue	blue	0.0917354	0.166768	0.0830361	0.0234372	0.0915922	-0.0235332	-0.0697228	0.0111052	0.105317	0.0065964	0.0242657	0.0246554	-0.0256771	-0.0272648	0.153158
SAP30	blue	blue	0.0536905	0.0489412	0.0770191	0.0646005	-0.0214179	0.0369999	0.0272558	-0.0121183	-0.00783473	0.0579898	-0.0735318	-0.0347635	0.011484	0.0248461	0.0749749
PFKL	blue	blue	0.15148	0.168481	0.0696784	0.0720482	0.132862	0.0455114	0.0129391	0.108058	0.123438	0.00508147	0.0166355	0.0661605	-0.0152605	-0.035898	0.118443
FBXO33	blue	blue	0.101701	0.155297	0.0471294	0.048868	0.0806214	0.0265393	-0.0277251	0.0304162	0.117716	-0.0404774	0.00527731	0.0656768	-0.0126888	-0.00717036	0.1281
STK35	blue	blue	0.24256	0.408055	0.314579	0.121849	0.0985081	0.0307331	-0.182377	-0.0218068	0.251069	0.0108938	-0.127894	0.038441	-0.112156	-0.0688523	0.380493
FRRS1	blue	blue	0.132741	0.207298	0.04236	0.0285836	0.134232	0.0194083	-0.0673406	0.0769967	0.180631	-0.124543	0.0480728	0.0957861	-0.0708228	-0.0525876	0.165812
RAPGEFL1	blue	blue	0.154884	0.243033	0.0856452	0.0695794	0.131429	0.021307	-0.0643181	0.0534564	0.176337	-0.0674502	0.0252674	0.0616506	-0.0496334	-0.0100035	0.21783
ENSMFAG00000038700	blue	blue	0.104995	0.129365	0.0322819	0.0292474	0.0983671	-0.0183294	-0.0199896	0.0253347	0.096191	-0.0170926	0.0597442	0.0380248	-0.0219095	0.0210593	0.144714
SHKBP1	blue	blue	0.0737379	0.10163	0.0311215	0.0253929	0.106064	0.00499325	-0.00348633	0.0658281	0.0745273	0.00631993	0.0226693	0.025521	-0.0126462	-0.0362198	0.0634985
AGL	blue	blue	0.134797	0.217158	0.0387387	0.0254627	0.190867	-0.0324039	-0.0360358	0.0720731	0.158872	-0.0482455	0.100239	0.0563633	-0.0539985	-0.027278	0.184839
NR2F6	blue	blue	0.147174	0.230739	0.0144294	0.0254811	0.214827	-0.0256867	-0.0584582	0.0959014	0.18997	-0.0833887	0.131659	0.0879491	-0.0463816	-0.0368594	0.175281
IP6K2	blue	blue	0.106985	0.128101	0.0796611	0.0508659	0.0727835	0.0002603	0.0176982	0.0305275	0.0594618	0.0531416	-0.0106672	-0.00968038	-0.0042159	0.00924205	0.133101
WBP1L	blue	blue	0.0826449	0.110415	0.0288861	0.0375592	0.0886131	-0.0145569	-0.0343755	0.0183719	0.086451	-0.0208915	0.0659366	0.0440433	-0.0182662	0.00747853	0.108466
PRPSAP1	blue	blue	0.135787	0.205371	0.0813198	0.0190659	0.139126	0.00121441	-0.0234856	0.0785664	0.177807	-0.0515793	0.00439399	0.0937605	-0.0822389	-0.0637277	0.12386
BCAT2	blue	blue	0.07149	0.10957	-0.0258972	0.0191968	0.115388	-0.0156527	-0.0325163	0.0575919	0.0848566	-0.0595542	0.0935571	0.0477887	-0.0102985	0.0128629	0.09267
PARP6	blue	blue	0.0614542	0.0788993	0.0607376	0.0231282	0.0237266	0.0201636	-0.0140122	0.00247614	0.0484433	-0.0059866	-0.0271341	0.00894067	-0.0132323	-0.00158984	0.0814379
PHF10	blue	blue	0.0812566	0.0921621	0.0570453	0.0665801	0.0354865	0.0354996	-0.00879051	0.0245609	0.0560447	0.00744471	-0.0130904	0.0174867	0.00763397	0.000436854	0.0866781
FIS1	blue	blue	0.199667	0.222024	0.0439041	0.048341	0.255366	0.00362296	0.0716059	0.172884	0.170125	-0.016681	0.120767	0.0874887	0.000796409	-0.00823503	0.167564
FDFT1	blue	blue	0.151889	0.184171	0.0819783	0.0542894	0.193571	0.0457369	0.0339744	0.154581	0.145576	0.00613285	0.0178647	0.0728975	-0.0253508	-0.0744792	0.0932177
SH3D19	blue	blue	0.101567	0.154347	0.0460852	-0.00102746	0.16566	-0.0304469	-0.0271031	0.080888	0.129522	0.0120093	0.0928707	0.0672794	-0.0257022	-0.0575129	0.110459
MROH1	blue	blue	0.0684901	0.0825524	0.0150591	0.0310891	0.0867622	-0.00163723	-0.0347471	0.0342659	0.0689419	-0.00415525	0.0808508	0.0424043	-0.00152206	-0.00323768	0.0701822
GSN	blue	blue	0.255692	0.369463	0.310391	-0.00928165	0.232716	-0.0493083	-0.121749	0.109992	0.33866	0.0683275	-0.0132155	0.16918	-0.180555	-0.189965	0.259289
SCARB2	blue	blue	0.127423	0.178774	0.140071	0.0554382	0.0750187	0.0100266	-0.0263773	0.0431038	0.130014	0.0200888	-0.0432183	0.0488011	-0.0511081	-0.0561323	0.140986
NT5DC1	blue	blue	0.129124	0.194255	0.0190495	0.0168636	0.174459	-0.00442569	-0.0383174	0.0725539	0.16484	-0.0693446	0.0886002	0.0877909	-0.0381145	-0.0401951	0.141735
ASAP3	blue	blue	0.102801	0.153148	0.0399432	0.0547779	0.0638179	0.00550384	-0.0593247	0.017081	0.0994911	-0.0434897	0.0459517	0.0257072	-0.0175039	0.0120436	0.16305
GOLGB1	blue	blue	0.146661	0.137552	0.109114	0.0944806	0.0635177	0.0298709	-0.0605859	0.0199711	0.107891	0.0480425	0.0288312	0.0638348	-0.00182053	-0.00520511	0.150022
GTF3A	blue	blue	0.163055	0.174394	0.121025	0.0849361	0.102007	0.0932652	0.0446796	0.103603	0.114697	0.0241432	-0.0351491	0.0504943	0.0208468	-0.0376117	0.134063
SH3GLB2	blue	blue	0.131029	0.179568	0.0419604	0.0130062	0.203282	-0.0116229	0.00336224	0.107354	0.154073	-0.0328724	0.0825198	0.0784027	-0.0392645	-0.0445975	0.12249
ETFA	blue	blue	0.163355	0.159499	0.1026	0.084992	0.117888	0.0823784	0.0467298	0.123895	0.113552	0.0298925	0.00578275	0.0737678	0.0166314	-0.0282969	0.125432
FECH	blue	blue	0.115499	0.173402	0.0495871	0.0285229	0.109068	-0.00395309	-0.0159039	0.0368408	0.114861	-0.0406373	0.0264153	0.0255808	-0.0386146	0.00202542	0.165956
DYNC1H1	blue	blue	0.1328	0.123989	0.115708	0.0976876	0.0657131	0.0500237	0.00103608	0.0622861	0.0811065	0.0781363	-0.0192845	0.0496279	0.00688458	-0.0201886	0.114298
NBDY	blue	blue	0.110144	0.110574	0.0728473	0.0410334	0.0889253	0.0355055	0.0672457	0.0890702	0.0727676	0.0305147	0.00694608	0.0315405	0.000982911	-0.00760088	0.0897951
WIPI2	blue	blue	0.139963	0.170809	0.0607264	0.0518984	0.129608	0.0380892	0.0163924	0.0844348	0.130034	-0.0193416	0.0266676	0.074666	-0.00334201	-0.00583416	0.137118
ITFG1	blue	blue	0.165994	0.204145	0.0830844	0.0691236	0.138354	-0.000594042	-0.0220623	0.0466115	0.133311	0.0125912	0.0644606	0.0440915	-0.0139334	0.0301936	0.195265
THOC7	blue	blue	0.190556	0.202938	0.146894	0.0906937	0.11639	0.0818547	0.0455354	0.109264	0.143528	0.0131315	-0.0379517	0.0608578	-0.0190303	-0.0366788	0.156687
QDPR	blue	blue	0.200787	0.236786	0.107246	0.0691672	0.180608	0.0415735	0.0281232	0.109671	0.156367	0.00877775	0.0373213	0.052705	-0.0234189	-0.011252	0.193894
GCC2	blue	blue	0.0963262	0.146828	0.0534856	0.0278762	0.0738627	-0.00721492	-0.0771046	0.0161709	0.108963	-0.0316852	0.0436616	0.0464544	-0.0465695	-0.0215627	0.11599
WASHC3	blue	blue	0.160643	0.164401	0.100104	0.0439819	0.159346	0.0164134	0.0561363	0.108478	0.117948	0.0315376	0.0267628	0.0467764	-0.024288	-0.0201685	0.135675
PLXNB1	blue	blue	0.0891507	0.117157	0.119788	0.04112	0.0653295	-0.0275055	-0.0737953	0.005518	0.0522636	0.104205	0.0168582	-0.0162455	-0.00848035	-0.00508628	0.12979
COMT	blue	blue	0.26256	0.333023	0.263003	0.106956	0.134086	0.0581439	-0.00229478	0.0963862	0.230818	0.0189308	-0.104958	0.0713535	-0.0995939	-0.0513708	0.296666
ENSMFAG00000040760	blue	blue	0.27467	0.323349	0.175343	0.0747786	0.272222	0.0777635	0.0528425	0.218888	0.27597	-0.0242098	0.020714	0.157157	-0.0533295	-0.103807	0.223728
RPAIN	blue	blue	0.110831	0.126914	0.0837828	0.0444007	0.0785786	0.00310442	0.0135616	0.0440909	0.0769479	0.0264358	-0.00647031	0.0043139	-0.00887844	0.00697525	0.118003
MRPL37	blue	blue	0.108912	0.103998	0.0559106	0.0566417	0.0931569	0.0283309	0.0725574	0.0895943	0.0624311	0.0253841	-0.00683648	0.00947746	0.0212873	-0.00083168	0.0831144
PON2	blue	blue	0.14745	0.15817	0.00866155	0.0351801	0.200268	0.00167798	-0.0457828	0.113317	0.142547	-0.00867035	0.192948	0.107833	0.0200734	-0.00978603	0.141235
PCK1	blue	blue	0.21603	0.377754	0.302982	0.141712	0.0676369	0.0699565	-0.1472	-0.012546	0.204108	0.0284219	-0.146068	0.00349719	-0.0478424	-0.0821181	0.395036
TMEM179B	blue	blue	0.129765	0.158377	0.0267773	0.038924	0.138248	0.0197694	-0.00688333	0.0801004	0.12121	-0.0344541	0.084584	0.0579838	-0.00755869	0.00784844	0.134194
ADNP2	blue	blue	0.0706195	0.079882	0.026862	0.0453223	0.0395842	0.0173767	0.00112873	0.0273193	0.054083	-0.00512345	0.0149368	0.0260422	0.00927793	0.0201919	0.0884887
ENSMFAG00000000988	blue	blue	0.101802	0.10226	0.0340123	0.0370979	0.105684	0.0152187	0.0352141	0.0849311	0.067213	0.0099128	0.0525994	0.0401706	0.00261006	-0.0022887	0.0863583
KLHL12	blue	blue	0.0761582	0.096473	0.0224443	0.0309124	0.101868	-0.0106962	-0.0241506	0.0440064	0.0707325	0.00316437	0.0628671	0.0411799	-0.0139787	-0.0160674	0.0749584
NCOA2	blue	blue	0.103382	0.16385	0.0527066	0.0274805	0.132965	-0.0174251	-0.0473456	0.047509	0.128894	-0.0270545	0.0587898	0.0630639	-0.0210053	-0.0252229	0.139097
THAP10	blue	blue	0.121233	0.180298	0.152977	0.0534766	0.0521211	0.0333059	-0.0179026	0.0139614	0.100013	0.0188979	-0.0914436	0.00682735	-0.0366659	-0.0435011	0.15378
ACBD5	blue	blue	0.100046	0.140403	0.0454667	0.0249125	0.105925	-0.00653207	-0.0212618	0.0357996	0.102641	-0.0257031	0.036237	0.0383118	-0.0218697	-0.0137156	0.104052
ENSMFAG00000035098	blue	blue	0.0754642	0.117292	0.0488936	0.0174784	0.0930004	-0.0244602	-0.0410222	0.0223242	0.0783742	0.0354342	0.0620546	0.0260722	-0.0100552	-0.0142425	0.102931
PWWP2B	blue	blue	0.0866214	0.12336	0.0235719	0.0165205	0.108003	-0.00365711	-0.0132233	0.0382435	0.0928414	-0.0274587	0.0419283	0.0511088	-0.0232439	-0.0106482	0.104222
ENSMFAG00000003779	blue	blue	0.0911991	0.125179	0.0701881	0.0264867	0.0550291	-0.000791394	-0.0273979	0.0320575	0.109099	-0.00162105	-0.0245918	0.0530677	-0.0409944	-0.0282513	0.097977
WDR61	blue	blue	0.110356	0.13335	0.0967071	0.0502629	0.0707764	0.0391658	0.018666	0.0572936	0.084359	0.0238638	-0.020547	0.0308671	-0.0145334	0.00333592	0.109121
ENSMFAG00000033742	blue	blue	0.11471	0.186692	0.141429	0.0686329	0.00485211	0.0493236	-0.0903717	-0.0197172	0.119925	-0.0224074	-0.0703464	0.0468016	-0.0230792	-0.0234434	0.176111
FAM114A1	blue	blue	0.122355	0.160832	0.12711	0.026484	0.119109	0.00466357	-0.0165375	0.0697251	0.120769	0.0647098	0.00152304	0.0432262	-0.0407127	-0.0767054	0.129349
HTATSF1	blue	blue	0.0907998	0.092274	0.0791142	0.0395044	0.0622667	0.0150193	0.00755261	0.0237606	0.0536531	0.0418919	0.00451345	0.0261192	-0.00225579	0.000353172	0.0919772
CAMSAP3	blue	blue	0.0996259	0.15892	0.0371963	0.0324444	0.125732	-0.00617621	-0.0757563	0.0486301	0.13778	-0.0630665	0.0668319	0.0767722	-0.0403141	-0.0502575	0.127404
PTS	blue	blue	0.115769	0.133444	0.0786528	0.0566763	0.0833117	0.0296778	-0.00114234	0.0460651	0.0872404	0.00991793	0.00654818	0.0370612	-0.00249103	-0.0108066	0.119289
SMIM30	blue	blue	0.145233	0.17938	0.0711401	0.0215822	0.187569	0.00533376	0.0261004	0.116542	0.158107	0.000923186	0.0525248	0.0856052	-0.0376634	-0.0578741	0.12643
ARL13B	blue	blue	0.0843548	0.0773202	0.105394	0.0816353	-0.00897272	0.0517299	-0.000369178	-0.00722573	0.0320144	0.0502214	-0.0555833	0.00836642	-0.00320272	0.020001	0.0853756
MON1A	blue	blue	0.0858808	0.111588	0.0326724	0.0206681	0.0740428	0.0276265	-0.0118045	0.0560092	0.0887622	-0.0339567	0.0147621	0.049406	-0.0090261	-0.0329689	0.0736691
NOTCH3	blue	blue	0.175079	0.286384	0.00474936	0.0593994	0.196473	0.00790912	-0.061846	0.0874102	0.220321	-0.16372	0.0916253	0.087427	-0.0599332	-0.0124335	0.259789
FBXO8	blue	blue	0.101315	0.154683	0.0489298	0.0503765	0.088378	-0.00541428	-0.0272405	0.0366257	0.108993	-0.0294133	0.010334	0.0300257	-0.0403314	-0.00162597	0.134125
SORL1	blue	blue	0.125479	0.199405	0.0314608	0.0418185	0.15091	0.0122212	-0.108344	0.0369402	0.16527	-0.0665923	0.109729	0.097748	-0.0347772	-0.0197137	0.17227
GPANK1	blue	blue	0.068037	0.0850385	0.0356617	0.0400033	0.0486634	0.0138941	0.00671979	0.00968883	0.0578426	-0.00658845	0.00607304	0.0170735	0.00391737	0.0104904	0.0714632
OTUB1	blue	blue	0.137277	0.144562	0.0817591	0.0535624	0.13329	0.0684551	0.0317962	0.123711	0.11893	0.000784357	0.0164399	0.0762862	-0.00637356	-0.0532334	0.0858984
PLPP2	blue	blue	0.189998	0.242736	0.0610985	0.0467447	0.242098	-0.0235033	-0.0142734	0.123687	0.168982	0.00838193	0.158113	0.0671283	-0.00284665	-0.00983885	0.217974
UBXN6	blue	blue	0.13556	0.16886	0.0897506	0.0465302	0.110734	0.0144428	0.0312862	0.066288	0.113238	0.0122592	-0.0071236	0.026556	-0.0277655	0.00168281	0.152326
MCUR1	blue	blue	0.0771318	0.0941254	0.0217632	0.0231805	0.106917	0.00209871	-0.00441507	0.0633839	0.0786288	0.000556851	0.0591778	0.0338084	-0.000195576	-0.0102129	0.0806029
DNAJB1	blue	blue	0.152639	0.242006	-0.013992	0.0444765	0.236646	-0.0251847	-0.0613806	0.11608	0.233067	-0.117886	0.175628	0.165466	-0.0131969	0.0317975	0.224643
C11orf58	blue	blue	0.23787	0.223878	0.130135	0.100549	0.174985	0.0763908	0.10387	0.156303	0.161098	0.0420378	0.00766947	0.0801784	-0.000664304	-0.00447038	0.187089
ZNF326	blue	blue	0.1953	0.237989	0.140688	0.0741876	0.147159	0.0833268	-0.0437574	0.118862	0.208715	-0.023733	0.0130528	0.145099	-0.0412094	-0.098448	0.158816
IFT27	blue	blue	0.072337	0.0856878	0.0175026	0.0265403	0.058661	0.0169192	-0.0121107	0.0283608	0.065601	-0.0280989	0.0311962	0.0222384	-0.00780714	0.00164522	0.073508
ACADSB	blue	blue	0.124577	0.168509	0.0753508	0.0497211	0.0819533	0.0141918	-0.0336446	0.0283483	0.117265	-0.0246379	0.0103303	0.0435595	-0.0292898	-0.00171096	0.154714
BAD	blue	blue	0.158387	0.210023	0.104786	0.0507615	0.127698	0.0159357	-0.0074942	0.0723936	0.142583	-0.00740754	-0.00135401	0.051978	-0.0249498	-0.0177891	0.167462
MTMR6	blue	blue	0.10451	0.122828	0.0625375	0.0419056	0.0714593	0.022113	-0.0292847	0.0358522	0.0994285	-0.00439239	0.0163841	0.0599291	-0.0378393	-0.029011	0.10635
TMEM131L	blue	blue	0.0948006	0.138681	0.110883	0.0641872	0.0593859	0.005406	-0.0120953	0.0258406	0.0724908	0.0484986	-0.0562789	-0.0138362	-0.0331517	-0.0161287	0.144668
WDTC1	blue	blue	0.107191	0.158779	0.0546725	0.0187591	0.119736	0.0168573	-0.0603166	0.0615433	0.146515	-0.0479749	0.0529927	0.099887	-0.0389524	-0.0476108	0.104574
MOSPD3	blue	blue	0.108821	0.158172	0.0369351	0.0105337	0.126513	-0.0052189	0.0139656	0.0761071	0.120077	-0.0318773	0.00712119	0.0320569	-0.047966	-0.0224285	0.110848
TMEM160	blue	blue	0.16543	0.198447	0.0619064	0.0495768	0.191662	0.0220958	0.00995199	0.137312	0.162269	-0.0352675	0.0525652	0.0831415	-0.0485767	-0.052209	0.139292
PHKB	blue	blue	0.164306	0.233336	0.0858045	0.0686189	0.154878	-0.00347884	-0.0572224	0.0550996	0.162092	-0.0275983	0.051513	0.05663	-0.0299562	-0.0146251	0.201918
VARS2	blue	blue	0.0906544	0.119751	0.103083	0.0474264	0.0640849	0.0416633	-0.0145643	0.0610869	0.0935791	0.0160505	-0.0363604	0.0447442	-0.0212574	-0.055708	0.0962361
ENSMFAG00000036539	blue	blue	0.223398	0.237948	0.131333	0.0781201	0.207706	0.0863018	0.0905871	0.20165	0.190687	0.00452203	0.0046695	0.110026	-0.010954	-0.0631417	0.151206
ACOX1	blue	blue	0.083485	0.12002	0.0450025	0.012522	0.0975546	-0.012041	-0.03351	0.042105	0.107582	-0.00045336	0.0366808	0.0590265	-0.0325236	-0.0272518	0.0933126
MRPS25	blue	blue	0.177721	0.170177	0.0833566	0.0705726	0.156683	0.0482069	0.0822649	0.121576	0.119547	0.00968923	0.0245515	0.0594782	0.00298788	-0.0197405	0.135533
ENSMFAG00000038571	blue	blue	0.157386	0.212611	0.0661736	0.0380165	0.154567	0.040341	-0.0717197	0.0853164	0.205068	-0.0747496	0.0809542	0.142065	-0.0542371	-0.0626722	0.151186
UBAC2	blue	blue	0.103553	0.10483	0.0695414	0.0464561	0.0520227	0.0247031	0.0048327	0.0351665	0.0699292	0.0118734	-0.0107596	0.0294054	-0.0162813	0.000455066	0.0985873
INTS7	blue	blue	0.0659668	0.0843509	0.0329271	0.0403329	0.0366975	0.0434699	-0.0249387	0.025881	0.0550871	-0.0166828	0.0212284	0.0282795	0.00683153	-0.00504466	0.0600027
TLDC2	blue	blue	0.129345	0.227912	0.125285	0.011199	0.107166	0.0265593	-0.0928246	0.042957	0.195871	-0.0388964	-0.0266084	0.0955949	-0.0739406	-0.11056	0.147972
ACACA	blue	blue	0.112321	0.15747	0.0816062	0.0785818	0.0703369	0.059279	-0.0472869	0.0531563	0.109248	-0.0239837	-0.00816152	0.0563231	-0.00393731	-0.0343047	0.118544
TBC1D14	blue	blue	0.118537	0.166515	0.11189	0.0585514	0.082651	0.018142	-0.0537838	0.0340089	0.117941	0.00865528	-0.00377172	0.0556677	-0.0196889	-0.0359534	0.14798
LRATD1	blue	blue	0.121161	0.166804	0.0373619	0.0543476	0.0903803	0.0330644	-0.0181566	0.0516692	0.121704	-0.0711714	0.0160881	0.0457418	-0.031439	0.0130349	0.145731
BROX	blue	blue	0.0749394	0.0968711	0.0268707	0.0267891	0.072349	-0.028916	-0.0246207	0.00902416	0.070439	-0.0183703	0.0229672	0.0145593	-0.0290752	0.00200673	0.097646
MKRN2	blue	blue	0.0903482	0.119873	0.039667	0.0558838	0.0555128	0.033319	0.00333086	0.0361531	0.0816501	-0.0157723	-0.0190899	0.028576	0.00473259	0.00169317	0.104359
MTCH2	blue	blue	0.144762	0.141666	0.0862756	0.0869117	0.119172	0.063076	0.0573633	0.114962	0.0909883	0.0394939	0.00461428	0.038696	0.0142461	-0.0245769	0.104764
SLC31A1	blue	blue	0.107928	0.115615	0.0721564	0.0619966	0.065516	0.0288618	-0.0431125	0.0361537	0.0883758	0.00971584	0.0261994	0.0586446	-0.00631369	0.00147485	0.101698
PPM1A	blue	blue	0.0775865	0.113215	0.0384629	0.0382039	0.0433901	0.0237187	-0.0393784	0.0168379	0.0966387	-0.0437658	0.00681727	0.0541729	-0.030953	-0.00536989	0.0963901
KIT	blue	blue	0.179846	0.328158	0.22964	0.0775919	0.110009	0.0479033	-0.123122	0.0383428	0.216365	-0.0116409	-0.103795	0.0401296	-0.0828928	-0.121439	0.266248
ENSMFAG00000019936	blue	blue	0.0935998	0.121307	0.00422065	0.0540436	0.0892591	0.0294168	-0.0151011	0.0397275	0.100502	-0.0572198	0.0631941	0.0597468	0.0111192	0.0118268	0.123218
NDUFB10	blue	blue	0.24623	0.249722	0.173944	0.12214	0.167596	0.0750243	0.103021	0.136822	0.153543	0.0623753	-0.026697	0.0485771	-0.00110242	-0.0105754	0.205617
EXOC1	blue	blue	0.0950445	0.12104	0.0672514	0.0509855	0.0858187	-0.00191786	0.0120925	0.0576533	0.0726367	0.0309311	-0.00338822	0.0168968	-0.00362335	-0.0111774	0.09396
SKAP2	blue	blue	0.0756128	0.0927714	0.0025515	0.0159804	0.113321	-0.0160792	-0.0021995	0.0571595	0.0711808	0.00916227	0.0908542	0.0428386	-0.00537775	-0.0136296	0.085054
SP1	blue	blue	0.0891409	0.113006	0.0312105	0.0168891	0.0858098	-0.00816227	-0.0394475	0.0442826	0.121221	-0.0460145	0.0605073	0.0931755	-0.0270886	-0.0171871	0.097211
KRCC1	blue	blue	0.135275	0.17223	0.0455239	0.032918	0.151506	-0.0236147	0.0038932	0.0566368	0.124911	-0.0109181	0.0741695	0.0473689	-0.0244944	-0.000922822	0.138207
LRBA	blue	blue	0.0602735	0.0844724	0.0335218	0.0202362	0.0407285	0.0073083	-0.0671041	0.00427613	0.0655232	-0.0164347	0.0149706	0.0316387	-0.0269591	0.00224155	0.0650655
MBNL3	blue	blue	0.105737	0.130181	0.121392	0.0438967	0.0666759	0.0269621	0.00849509	0.050727	0.0820307	0.0376798	-0.0321698	0.0282522	-0.0220717	-0.0445387	0.109775
AP2M1	blue	blue	0.213043	0.215035	0.121721	0.0911147	0.176018	0.0474176	0.0760399	0.139829	0.147035	0.0420723	0.0152927	0.0601274	-0.00462705	-0.00189501	0.181584
PHLDA3	blue	blue	0.193598	0.252227	0.0895881	0.0340464	0.200681	0.0616245	-0.000860142	0.165208	0.234785	-0.0622525	0.0400375	0.160051	-0.0570798	-0.0833399	0.167719
ADIPOR2	blue	blue	0.140555	0.166285	0.0928262	0.0609875	0.0971319	0.0415898	-0.0386848	0.0571817	0.140069	-0.022225	0.0192554	0.0959778	-0.0194791	-0.0401473	0.122119
RAB2A	blue	blue	0.167641	0.206926	0.0605308	0.024417	0.219322	0.0391304	-0.032053	0.142398	0.211161	-0.0251811	0.132745	0.15842	-0.0183892	-0.0934526	0.135302
ARHGEF9	blue	blue	0.0922162	0.136628	0.062754	0.0221749	0.105631	-0.00808147	-0.0121857	0.0570879	0.0971441	0.00634692	0.0286255	0.0316999	-0.0197708	-0.0329988	0.0890557
REEP4	blue	blue	0.127453	0.20754	-0.0439337	0.0214667	0.255384	-0.0128452	-0.0442635	0.140332	0.197902	-0.129382	0.188986	0.123709	-0.0421982	-0.0406038	0.165489
GLE1	blue	blue	0.0765557	0.0982709	0.0475062	0.0444753	0.034784	0.00670608	-0.020001	0.0102446	0.0473302	-0.00185949	-0.0149379	0.0073571	-0.00470512	0.00683691	0.0920241
FZD6	blue	blue	0.0947318	0.135394	0.0214124	0.031967	0.120553	-0.0107343	-0.00836259	0.0627295	0.0953015	-0.0119463	0.0567087	0.0487201	-0.00634254	-0.00664333	0.123322
ENSMFAG00000041693	blue	blue	0.0899978	0.131098	0.0289024	0.04338	0.0847315	0.00576851	-0.0355174	0.0407063	0.0928375	-0.0511145	0.0424525	0.0311846	-0.0106233	0.0101749	0.119347
PPP4R3B	blue	blue	0.102641	0.123538	0.0711163	0.0367852	0.0794697	0.0113128	-0.0189527	0.0375148	0.0907312	0.00242513	0.0101469	0.0320429	-0.0203593	-0.00853387	0.101894
WDR41	blue	blue	0.139618	0.18992	0.10324	0.0545907	0.11659	0.0158863	-0.00734315	0.0596655	0.126823	-0.00229191	0.0015299	0.0390194	-0.0398927	-0.0385164	0.180932
PPP1R7	blue	blue	0.164168	0.185521	0.0579618	0.0439997	0.175087	0.0562663	0.0266648	0.131862	0.155096	-0.0176178	0.039534	0.0870902	-0.0132011	-0.0498262	0.132834
REPS1	blue	blue	0.110527	0.167353	0.0659513	0.037851	0.0839305	0.0142953	-0.0458384	0.0392108	0.131971	-0.0448839	-0.00177858	0.0571957	-0.0652418	-0.0222017	0.135675
YIPF1	blue	blue	0.113924	0.148089	0.0267621	0.0192812	0.142456	0.018667	-8.51289e-05	0.0954638	0.13471	-0.0524723	0.066921	0.0816036	-0.0222963	-0.047947	0.0888183
ENSMFAG00000033280	blue	blue	0.139279	0.151525	0.0635221	0.0381946	0.122232	0.00651996	0.0199219	0.0819196	0.114779	0.0132628	0.0328747	0.0482901	-0.0124187	-0.0206463	0.13177
ANAPC13	blue	blue	0.156397	0.172314	0.0664677	0.0539437	0.149593	0.0427956	0.0444934	0.102882	0.115044	0.00628432	0.0182633	0.0472446	-0.00583591	-0.0140389	0.129148
MVK	blue	blue	0.155085	0.283009	0.113185	0.0308131	0.185074	0.0234162	-0.06731	0.101268	0.217806	-0.0709545	-0.0287999	0.07444	-0.0886704	-0.109387	0.198978
NEK9	blue	blue	0.0603101	0.0754821	0.0322251	0.038585	0.0384126	-0.00119723	-0.0127119	0.0165623	0.0392644	0.00686663	0.0281872	0.0062653	0.00345746	0.0210774	0.0775311
C6orf52	blue	blue	0.106048	0.151822	0.0649822	0.0217403	0.103107	-0.00983278	-0.00702973	0.0368166	0.0996727	-0.00654484	0.0185191	0.0248952	-0.0460922	-0.0198187	0.131011
KIAA0895	blue	blue	0.0918648	0.13114	0.123422	0.0578414	0.0263689	0.0361523	-0.0346408	0.0206959	0.0941079	0.0242436	-0.0736477	0.0291614	-0.0191126	-0.0419417	0.106087
TACC2	blue	blue	0.10871	0.154792	0.0744383	0.0328815	0.110056	0.0177795	-0.0804848	0.06605	0.146536	-0.0163282	0.0720083	0.117155	-0.0290952	-0.0286919	0.135164
CHMP5	blue	blue	0.146	0.189593	0.00815465	-0.00658068	0.254827	-0.0551374	0.0205174	0.13478	0.181401	-0.026098	0.174983	0.111414	-0.0396212	-0.0463888	0.146744
ZZEF1	blue	blue	0.154032	0.227545	0.0696102	0.0710108	0.141769	0.00917953	-0.0823156	0.0404228	0.173625	-0.0626896	0.0760112	0.0778957	-0.0351709	-0.0261157	0.194139
MCM4	blue	blue	0.150749	0.113417	0.147272	0.116843	0.0176402	0.0902476	0.0376208	0.040216	0.0414422	0.0904081	-0.0739579	-0.00269114	0.0381385	0.0206463	0.122893
LYPLAL1	blue	blue	0.0921101	0.151952	0.0747687	0.0238496	0.0824304	-0.00713178	-0.0259175	0.0268559	0.0934093	-0.00375307	-0.00751096	0.0233937	-0.0442273	-0.0260885	0.127858
DLD	blue	blue	0.140962	0.144757	0.0506409	0.0565785	0.145103	0.0488057	0.0029986	0.108857	0.137305	-0.0286973	0.0613759	0.0994375	-0.011562	-0.0374633	0.0932023
NIPAL3	blue	blue	0.0544663	0.0738634	0.0419654	0.0138781	0.0634326	-0.00945907	-0.00528265	0.0235402	0.063843	0.0100902	0.0225267	0.0396204	-0.0186459	-0.0124343	0.074085
WNK2	blue	blue	0.181788	0.322038	0.0782912	0.0636682	0.169203	0.058395	-0.144161	0.0669727	0.267189	-0.151074	0.0361431	0.13286	-0.0631054	-0.0773648	0.253938
WBP2	blue	blue	0.111963	0.143101	0.0569565	0.0166601	0.108247	0.00184261	-0.0288442	0.0626965	0.126002	-0.0256919	0.0422065	0.0855507	-0.0382711	-0.0148314	0.109961
SMARCD2	blue	blue	0.136241	0.186814	0.053521	0.0623418	0.129813	0.00255782	-0.0324202	0.0490381	0.117379	-0.0306492	0.0456797	0.0237678	-0.0179055	0.0137032	0.177074
PIR	blue	blue	0.135599	0.207464	0.0704512	0.0369119	0.114887	0.0289047	-0.0747451	0.0535217	0.181226	-0.0673578	0.0252628	0.10543	-0.0574623	-0.0581817	0.166658
TNNC1	blue	blue	0.042826	0.0856587	-0.0431117	-0.0286757	0.143309	-0.0123628	-0.0429654	0.0784196	0.104498	-0.0685113	0.138733	0.0954557	-0.0166455	-0.03302	0.0426604
CBR4	blue	blue	0.0785848	0.0981208	0.0622892	0.0136886	0.099545	-0.00376643	0.0151332	0.0505218	0.0734186	0.0411653	0.0293533	0.0202592	-0.0164457	-0.0218606	0.088036
MZT1	blue	blue	0.122785	0.133768	0.054281	0.0781909	0.0758633	0.0480273	0.0205117	0.0569801	0.0898005	-0.0160914	0.000929223	0.0461876	0.00325626	0.0101368	0.113762
SLC35B3	blue	blue	0.0771634	0.0977459	0.0233233	0.0182662	0.0814967	0.00758586	-0.0092311	0.0505315	0.0789545	-0.00320634	0.0331929	0.0464721	-0.0108494	-0.0103839	0.072032
GOLGA2	blue	blue	0.097507	0.139126	0.0926948	0.0144829	0.0966656	-0.0210183	-0.0462709	0.0420455	0.119524	0.0204274	0.0353009	0.0571268	-0.0582097	-0.0404079	0.111138
COG4	blue	blue	0.0896931	0.117342	0.0529798	0.0384182	0.0845434	0.000964935	-0.00678071	0.0416768	0.0723621	0.00818262	0.00850361	0.0197272	-0.0156231	-0.0105078	0.108696
C1orf174	blue	blue	0.118742	0.146509	0.0868455	0.0557468	0.0665555	0.0423182	0.0125056	0.0492477	0.0954104	-0.00811067	-0.0513314	0.0355568	-0.0290531	-0.00873807	0.10263
RASSF4	blue	blue	0.150412	0.261887	0.11261	0.0244137	0.14666	0.038402	-0.0832711	0.0808981	0.228012	-0.084849	-0.0195896	0.111517	-0.0988995	-0.12376	0.176998
AGTRAP	blue	blue	0.123447	0.109692	0.0710772	0.0548198	0.108404	0.0165458	0.0379401	0.0768138	0.0560134	0.0854673	0.0333208	0.0113908	0.00775199	-0.00479619	0.109461
CHRNB1	blue	blue	0.0893906	0.115462	0.0503434	0.0291221	0.067429	0.00208125	0.00936803	0.0235882	0.0708985	0.00302232	-0.00121786	0.00639279	-0.0229595	0.0194161	0.105988
HDDC3	blue	blue	0.109249	0.13459	0.00864506	0.0227503	0.144626	0.0138637	0.0287342	0.0975238	0.095504	-0.0351826	0.0578543	0.0395609	-0.0128056	-0.0165149	0.0986208
ENSMFAG00000039865	blue	blue	0.145899	0.17495	0.030954	0.0663571	0.143886	0.0360126	-0.0425268	0.0651898	0.132871	-0.0487774	0.0933889	0.0761112	0.00584273	-0.00401764	0.147717
RAD21	blue	blue	0.266604	0.318382	0.306594	0.150479	0.09916	0.109694	-0.0252126	0.106723	0.216886	0.0684095	-0.150277	0.0744682	-0.0600925	-0.11851	0.235015
ELMO3	blue	blue	0.0885643	0.104293	0.0616633	0.0240082	0.0728994	0.0104064	-0.0022661	0.0546236	0.0751084	0.0151547	0.00103896	0.0230798	-0.0160361	-0.0217355	0.0916403
MFN1	blue	blue	0.0960253	0.109351	0.0563079	0.0374447	0.0690107	0.0201764	-0.0033084	0.0474611	0.0865311	-0.00505095	0.00346153	0.0440593	-0.035542	-0.0119453	0.103712
ZNF827	blue	blue	0.124762	0.173056	0.0726524	0.051042	0.136406	-0.0166996	-0.0578952	0.0569784	0.120909	0.00707752	0.0715195	0.0482165	-0.0114003	-0.0182463	0.154519
ORMDL3	blue	blue	0.0830257	0.124125	0.0602806	0.0375306	0.0377644	0.0110682	-0.0264957	-0.00203358	0.079087	-0.019375	-0.0278879	0.0145892	-0.0331778	0.000569341	0.120642
UBXN2A	blue	blue	0.0716295	0.103949	0.0592268	0.0203732	0.0570764	0.0133956	-0.0462968	0.0350286	0.0947103	-0.0192043	0.0105136	0.0564658	-0.0346782	-0.0284366	0.0782005
PNPO	blue	blue	0.105849	0.121346	0.0946076	0.0600633	0.0693824	0.0296712	-0.00629192	0.0467135	0.08264	0.0365296	-0.00470348	0.0358187	-0.00304147	-0.0354747	0.0927338
POLR2G	blue	blue	0.166035	0.151895	0.0891123	0.0963699	0.109348	0.0752172	0.0708916	0.0936143	0.0864137	0.0307918	-0.0108682	0.0285818	0.0146679	0.00490635	0.141507
ABITRAM	blue	blue	0.0598953	0.0877229	0.0143133	0.0339912	0.0659792	0.0115973	-0.00929096	0.030625	0.0699863	-0.0386705	0.0112229	0.0333158	-0.0132782	-0.00994183	0.0670012
JOSD2	blue	blue	0.100461	0.132697	0.0506229	0.0257196	0.135726	0.00393357	0.0217194	0.091616	0.101726	-0.0103439	0.0503308	0.0438204	-0.0278666	-0.037463	0.0890796
DOCK6	blue	blue	0.0769761	0.116381	0.0277409	0.0375757	0.0856535	0.022157	-0.0486263	0.0570021	0.100187	-0.0315541	0.0524462	0.0621334	-0.00899754	-0.0516297	0.0875631
RAB14	blue	blue	0.227915	0.282175	0.108835	0.0655694	0.207153	0.0404657	0.00202999	0.13395	0.236755	-0.0416007	0.0418565	0.125509	-0.0583348	-0.0704027	0.213299
CELSR2	blue	blue	0.112579	0.138102	0.0851896	0.0673524	0.0742427	0.0083613	-0.00883469	0.0316935	0.0714211	0.0437426	-0.00189986	-0.00215508	0.00266337	0.00705806	0.154546
RHNO1	blue	blue	0.0927756	0.105569	0.0304239	0.0267376	0.0877884	0.0105703	0.0232554	0.0525856	0.066128	0.00382453	0.0245641	0.0148866	-0.00266245	-0.00227853	0.0870251
GPD1L	blue	blue	0.0749845	0.132622	0.0370424	0.00369922	0.0856934	-0.003357	-0.0392273	0.0269041	0.10527	-0.0417569	0.0359471	0.04628	-0.0412877	-0.0385773	0.0941229
UROD	blue	blue	0.106219	0.102707	0.079753	0.040788	0.0887722	0.0196002	0.0412193	0.0715372	0.0596682	0.0424096	0.0139361	0.00469933	-0.0142438	-0.00219777	0.104764
FASTK	blue	blue	0.103921	0.136656	0.0589331	0.0315755	0.0933577	0.0072232	0.00683203	0.0395658	0.0887573	0.00364048	0.00832294	0.0201577	-0.0156851	-0.00970093	0.13134
SGPL1	blue	blue	0.0741618	0.092378	0.0887433	0.0200055	0.067872	-0.00367519	0.00180326	0.0460258	0.066244	0.0683553	-0.0273806	0.0199395	-0.0156219	-0.0439966	0.0661612
ENSMFAG00000001258	blue	blue	0.0823032	0.0964191	0.0224386	0.0261431	0.0894381	-0.00475499	0.0333246	0.0554721	0.0631216	-0.00637664	0.0256854	0.0218625	-0.0164249	0.00279517	0.0659425
PMVK	blue	blue	0.238531	0.342484	0.148213	0.042193	0.263761	0.0519278	-0.0238038	0.189185	0.299877	-0.086177	0.0168094	0.158055	-0.0994746	-0.132569	0.228522
FOSL2	blue	blue	0.188421	0.275744	0.0853796	0.0774031	0.187576	0.0467059	-0.114379	0.101956	0.242595	-0.0901657	0.108492	0.171323	-0.0260304	-0.0470923	0.25377
ATP8B1	blue	blue	0.0816934	0.140607	0.0202625	0.0173874	0.107775	0.0147685	-0.0986038	0.0563586	0.145991	-0.0774849	0.0879374	0.119364	-0.0243145	-0.048091	0.0972953
CAMK2G	blue	blue	0.0971511	0.15739	0.0231823	0.0205154	0.142421	-0.0155821	-0.0255905	0.0658313	0.116452	-0.0488594	0.0660331	0.0369258	-0.0243199	-0.0122366	0.129673
CROT	blue	blue	0.159898	0.257396	0.0955719	0.0529112	0.150024	0.0143686	-0.0709403	0.0586219	0.185762	-0.0601184	0.0235362	0.0674752	-0.0604993	-0.0385676	0.226598
EEA1	blue	blue	0.103614	0.134369	0.081598	0.0586638	0.0648469	0.0373158	-0.0351428	0.0247991	0.101824	-0.0124364	0.00698979	0.0581326	-0.00743069	-0.0302193	0.114393
FBXO22	blue	blue	0.141061	0.194946	0.107725	0.0742327	0.0883026	0.00541084	-0.0261163	0.0279752	0.124259	-0.00162716	-0.0230104	0.0269415	-0.0514417	-0.000537878	0.185628
CISD1	blue	blue	0.232282	0.267955	0.179561	0.0940398	0.16421	0.103112	0.00528002	0.150961	0.218594	0.00334192	-0.0512454	0.12045	-0.0480644	-0.102649	0.178244
PDHB	blue	blue	0.115622	0.117941	0.085218	0.0457208	0.0693287	0.0112629	0.0571264	0.0528746	0.0651093	0.0242954	-0.0306283	0.00261538	-0.0202219	0.00150884	0.108864
PBRM1	blue	blue	0.151028	0.14184	0.0699226	0.12027	0.0807881	0.0602903	0.0160131	0.0601819	0.0816654	0.031417	0.000954448	0.0359832	0.024412	0.0264882	0.148157
ENSMFAG00000033349	blue	blue	0.106681	0.131462	0.0288025	0.0352779	0.107971	0.0141231	-0.0284313	0.04925	0.108165	-0.0338777	0.0623608	0.0637642	0.00977882	0.00807095	0.116133
CCDC115	blue	blue	0.131222	0.143447	0.0782188	0.0619537	0.0646756	0.0498134	0.0250489	0.0512863	0.0822518	-0.00285023	-0.0277733	0.0243569	-0.01805	0.0126633	0.119487
PDK3	blue	blue	0.16797	0.26788	0.158319	0.105796	0.0632472	0.0593352	-0.0750965	0.0185377	0.159307	-0.0228923	-0.0650248	0.0349038	-0.0372515	-0.0148609	0.274884
ENSMFAG00000042463	blue	blue	0.144767	0.274868	0.129409	0.045673	0.102014	0.0584168	-0.116632	0.0583664	0.246275	-0.0945997	-0.0746598	0.123919	-0.0931864	-0.118568	0.18484
YIF1A	blue	blue	0.177232	0.195965	0.0964749	0.0613688	0.157002	0.0674969	0.00970735	0.125039	0.155664	0.0121881	0.0317202	0.0907705	-0.0250286	-0.0534987	0.128574
ZBTB7C	blue	blue	0.0941062	0.1746	0.0145375	0.0330908	0.12367	-0.015295	-0.050639	0.0412262	0.116004	-0.0658532	0.0646638	0.0298311	-0.0172304	0.0148815	0.157172
NFIL3	blue	blue	0.0428879	0.0635552	-0.00780959	0.0315468	0.0378986	0.00477532	-0.039152	-0.00301777	0.0678056	-0.0295749	0.0596619	0.0602542	0.02132	0.0272646	0.0894078
ENSMFAG00000044635	blue	blue	0.126509	0.139471	0.074643	0.0485303	0.0813826	0.0314226	0.0325718	0.071441	0.101632	0.00333198	-0.0197399	0.0329504	-0.0159835	-0.0125858	0.113036
PROM2	blue	blue	0.127458	0.223798	0.0857212	0.0308008	0.164475	-0.0294838	-0.0570665	0.0813764	0.161603	-0.039652	0.0204373	0.0477779	-0.0762963	-0.0609341	0.166519
KDM5B	blue	blue	0.144063	0.159905	0.116313	0.066604	0.117213	0.0109954	0.0265422	0.0958454	0.108009	0.0682215	-0.00085015	0.0422292	-0.00153467	-0.02417	0.145176
CHST15	blue	blue	0.06917	0.0798181	0.0892013	0.0357588	0.0409288	-0.00124357	-0.0276501	0.00660781	0.0510962	0.0535597	-0.000511962	0.0228886	-0.0179503	-0.0172566	0.0837115
MDH1	blue	blue	0.21441	0.225133	0.129931	0.103059	0.174948	0.0495809	0.0612211	0.141331	0.156792	0.0286532	0.013851	0.0592595	-0.0336661	-0.00747182	0.181627
TNRC18	blue	blue	0.0593547	0.0862502	0.0269115	0.0383937	0.0625467	-0.0280708	-0.0567278	0.00254947	0.055797	0.0045885	0.0551704	0.0240672	-0.00907189	0.0205896	0.102008
RSRC2	blue	blue	0.118274	0.130404	0.098942	0.0681261	0.0507574	0.0535411	-0.0153219	0.0589661	0.0974295	0.022142	-0.036942	0.0479328	-0.00960596	-0.0142644	0.101477
NR1D1	blue	blue	0.126758	0.216262	0.10867	0.107202	0.0135772	0.0235583	-0.0519648	-0.0343163	0.117782	-0.0531549	-0.0997475	0.00294811	-0.031275	0.0456279	0.244537
TOM1L1	blue	blue	0.30039	0.455469	0.453831	0.0772189	0.20765	0.0639513	-0.0704826	0.162315	0.321503	0.119316	-0.211872	0.0850689	-0.159557	-0.261125	0.321208
SMIM14	blue	blue	0.118832	0.16864	0.00530638	0.0123354	0.175917	-0.0318644	-0.0322311	0.0714006	0.13849	-0.0468734	0.131501	0.0731342	-0.0226694	-0.0236193	0.162146
IGSF8	blue	blue	0.102804	0.136181	0.0851813	0.0636411	0.0260073	0.027981	-0.0127953	0.0155098	0.0769183	-0.0133286	-0.0313478	0.0092437	-0.0213507	0.0273164	0.144364
ANKIB1	blue	blue	0.0826379	0.0821359	0.0741178	0.0440681	0.0375456	0.0247132	-0.0119767	0.022413	0.0557171	0.045063	-0.00983593	0.0287308	0.00822757	-0.00569868	0.0825251
PTPRF	blue	blue	0.141326	0.193241	-0.00147339	0.0546051	0.179897	-0.0453697	-0.0285563	0.0655871	0.133431	-0.0259561	0.114504	0.046695	-0.0193267	0.0235464	0.184215
ACO2	blue	blue	0.153726	0.170659	0.112938	0.0739948	0.114325	0.0383225	-0.00527207	0.0870443	0.124557	0.0193379	0.0152139	0.0626766	-0.0216076	-0.00554183	0.1397
SMDT1	blue	blue	0.212829	0.255565	0.026076	0.0179858	0.314915	-0.0176582	0.106046	0.206203	0.224638	-0.0635435	0.145226	0.120762	-0.0448504	-0.0387968	0.184911
PGP	blue	blue	0.121977	0.142592	0.0471288	0.057768	0.121396	0.0247058	0.00307799	0.08078	0.0962055	-0.00968153	0.0278697	0.0368678	-0.0056637	-0.016574	0.110937
GNS	blue	blue	0.0847589	0.114285	0.0425736	0.0126054	0.0851151	-0.00739104	-0.065598	0.0187626	0.0914762	0.0021794	0.0634063	0.052552	-0.0312702	-0.0216483	0.108411
PITPNM2	blue	blue	0.0850027	0.130176	0.0242604	0.0404494	0.0833107	0.00108259	-0.0427816	0.0299321	0.0902415	-0.0377709	0.045328	0.0344107	-0.0209439	0.00114175	0.114389
TMEM14C	blue	blue	0.254921	0.321096	0.11292	0.0561821	0.25384	-0.000687892	0.0296818	0.140353	0.252381	-0.0529253	0.0706271	0.106061	-0.0893844	-0.0470445	0.26417
KCTD17	blue	blue	0.107955	0.137699	0.00141875	0.031103	0.140608	0.0146117	-0.0226101	0.0824621	0.132937	-0.0755141	0.0874835	0.0973861	-0.0168963	-0.0301556	0.104089
FAM210B	blue	blue	0.196827	0.271947	0.136777	0.050936	0.176437	0.00646034	0.00101976	0.0861158	0.196058	-0.00923536	-0.00656367	0.0762435	-0.0640496	-0.0411196	0.237775
FMN1	blue	blue	0.138575	0.203634	0.152557	0.0585459	0.0892806	0.0479262	-0.0675085	0.0737807	0.166587	-0.00934357	-0.0497948	0.0806281	-0.0630117	-0.0937382	0.151142
TIMM17B	blue	blue	0.112367	0.130478	0.0340504	0.0430972	0.100119	0.0357024	0.0126787	0.067782	0.0999438	-0.035827	0.010022	0.053105	-0.00751101	-0.00508148	0.119111
GSE1	blue	blue	0.0929363	0.160494	0.155112	0.0680886	0.0260959	0.0128767	-0.0605264	-0.00969869	0.0766483	0.0642759	-0.0815394	-0.00293954	-0.0261944	-0.0289023	0.15024
ATP7A	blue	blue	0.0790479	0.112341	0.0633147	0.049131	0.0367123	0.0113233	-0.0187328	0.00661904	0.0605719	0.000847263	-0.0132255	0.0137756	-0.0278399	-3.32108e-05	0.104209
AMFR	blue	blue	0.131372	0.176176	0.140906	0.0764981	0.0276037	0.0560739	-0.0426001	0.00550979	0.108908	0.00266118	-0.0539446	0.0339521	-0.0332122	-0.0269913	0.162115
SH3BGRL	blue	blue	0.113054	0.138248	0.060782	0.0190965	0.141131	-0.0197614	0.0476236	0.0813301	0.0982338	0.0304808	0.0428714	0.0375606	-0.0166796	-0.0160486	0.110699
ENSMFAG00000047015	blue	blue	0.0819195	0.0885865	0.0510388	0.0321852	0.0636856	0.0208977	-0.0340656	0.0317808	0.0849643	-0.00208931	0.0405598	0.0768123	0.00992612	-0.0174604	0.0737136
ENSMFAG00000040652	blue	blue	0.121145	0.159013	0.0280742	0.0293886	0.134618	0.0269275	0.00624087	0.0914662	0.132637	-0.0569839	0.0702317	0.0832407	-0.000538448	-0.00995981	0.113565
CYP39A1	blue	blue	0.0666554	0.0977139	0.03847	0.016755	0.0944181	-0.0309913	0.00263379	0.0436046	0.0610552	0.0118458	0.0446125	0.00460016	-0.0160028	-0.0110298	0.0945737
PITPNM3	blue	blue	0.0457113	0.0738533	-0.0182569	0.0314309	0.0692239	-0.0302967	-0.0186301	0.0109336	0.0413414	-0.0278041	0.0718016	0.00238416	-0.0105272	0.0277716	0.0742992
ZNF277	blue	blue	0.0664734	0.0808212	0.0365468	0.0332058	0.0528169	0.0132409	-0.0092328	0.0317975	0.0603505	-0.0121105	0.00304753	0.0193439	-0.00956049	-0.0189163	0.0614284
WASHC4	blue	blue	0.0758949	0.0820303	0.0716743	0.0480439	0.0323599	0.0112697	-0.00283308	0.014732	0.0410213	0.042383	-0.027337	0.00379913	-0.00913087	-0.0176198	0.0826192
DNAJB4	blue	blue	0.0742897	0.108546	0.0735539	0.0186856	0.0692469	-0.00989234	-0.0320712	0.0336676	0.100059	0.0104631	-0.0011793	0.0596125	-0.0432313	-0.0200446	0.0809718
ENSMFAG00000033257	blue	blue	0.0709977	0.0689631	0.0374389	0.0465313	0.049816	0.00931667	0.0123053	0.0245744	0.0399169	0.0187933	0.00598358	0.00956213	0.0133257	0.0250608	0.0730138
ENSMFAG00000033269	blue	blue	0.12329	0.152744	0.0738176	0.0321916	0.118355	0.00244967	-0.00323891	0.0563924	0.105422	0.0168342	0.0195933	0.0357804	-0.0274494	-0.0183376	0.123469
DNAJC24	blue	blue	0.0613769	0.0700845	0.0518412	0.0242682	0.0400752	0.00382366	0.0171946	0.0135104	0.0346059	0.0214291	-0.0187976	-0.00321246	-0.00484568	-0.00615473	0.0607002
GPAA1	blue	blue	0.0926024	0.0974139	0.0170774	0.0388031	0.0902407	0.0173893	0.00210287	0.0600148	0.0575152	-0.0034935	0.0521637	0.0185438	0.00215662	0.0166341	0.0837718
MARCHF6	blue	blue	0.179991	0.245846	0.206705	0.138334	0.0284291	0.0833651	-0.103299	0.00402745	0.165354	0.00571844	-0.0836776	0.0622707	-0.0313194	-0.022085	0.245888
OSGEP	blue	blue	0.112574	0.118282	0.0775992	0.0679028	0.0612907	0.0236299	0.00856818	0.0279747	0.0582875	0.0305129	-0.00155315	-0.00176779	-0.00665699	0.0278862	0.13182
ISCU	blue	blue	0.14433	0.156734	0.104258	0.0943043	0.0601768	0.0337721	0.00896022	0.0246625	0.0785097	0.0264848	-0.00926938	0.0115972	-0.00124411	0.0385103	0.183818
ADCY6	blue	blue	0.086876	0.121487	0.0842595	0.0292772	0.0702497	0.00156079	-0.0545018	0.0181911	0.0871417	0.0171874	0.0239665	0.0376762	-0.0304862	-0.0209103	0.101443
CHTF8	blue	blue	0.12267	0.136054	0.094208	0.0483609	0.0721524	0.0307828	0.00985393	0.0639532	0.121706	-0.0125768	-0.0316256	0.0692372	-0.0467222	-0.037853	0.105531
ENSMFAG00000043471	blue	blue	0.15452	0.234914	0.0785021	0.0283276	0.152852	0.0281186	-0.0522878	0.0873573	0.197774	-0.0762066	-0.00404313	0.0908038	-0.0625152	-0.068283	0.158236
KIAA1324L	blue	blue	0.116857	0.179387	0.156933	0.0619203	-0.00333686	0.0206011	-0.091227	-0.0332039	0.110935	-0.0157339	-0.0755723	0.0249783	-0.0456258	-0.00169179	0.194601
MTX2	blue	blue	0.122088	0.133341	0.0263918	0.0392274	0.14873	0.0204993	0.00772078	0.10221	0.113426	-0.0312808	0.0757166	0.0654882	-0.00407549	-0.0302843	0.102085
ELP4	blue	blue	0.129114	0.20452	0.147549	0.0820817	0.034433	0.02729	-0.0377326	-0.0056692	0.105947	0.00240686	-0.112368	-0.00652384	-0.0359387	-0.000617147	0.196568
TRIM37	blue	blue	0.0797482	0.100157	0.0919951	0.0311662	0.055981	0.00398308	-0.0325909	0.0199381	0.0668727	0.0361482	-0.00628355	0.0168925	-0.0268501	-0.0415726	0.0896912
ENSMFAG00000045047	blue	blue	0.324959	0.355305	0.25228	0.135523	0.210537	0.125584	0.0524016	0.192649	0.287186	0.0187314	-0.0553414	0.156139	-0.0677626	-0.0947288	0.259004
COPG1	blue	blue	0.0919984	0.108285	0.0534724	0.036307	0.100175	0.00277397	-0.00130762	0.0618988	0.0747075	0.0207228	0.0484463	0.0381153	-0.00937745	-0.00668523	0.0825104
STRBP	blue	blue	0.11673	0.155362	0.0406565	0.0282225	0.120302	0.0307402	-0.0223597	0.0759039	0.135237	-0.0487657	0.051615	0.077517	-0.0215377	-0.0212099	0.119826
AP5M1	blue	blue	0.0816664	0.0995619	0.0294697	0.0226396	0.0883676	0.0175717	-0.0045092	0.0555173	0.09185	-0.0280823	0.0274806	0.0530552	-0.0182707	-0.0256708	0.0722919
PRDX2	blue	blue	0.226422	0.219224	0.206309	0.127049	0.116905	0.0654459	0.13687	0.119064	0.107594	0.0933679	-0.0877941	4.29215e-05	-0.0114123	0.0200465	0.219881
USP5	blue	blue	0.126779	0.161273	0.0835419	0.0529523	0.113968	0.0220786	-0.0123673	0.0654706	0.11632	-0.00171506	0.00702046	0.0482855	-0.030134	-0.027937	0.12853
FDXR	blue	blue	0.0690755	0.0917411	0.0395443	0.0251618	0.0799414	-0.00328086	0.0292033	0.0504375	0.0525022	0.0188059	0.00727378	0.0063032	-0.0186279	-0.020241	0.0690029
TRIAP1	blue	blue	0.0967427	0.114882	0.0256746	0.0307399	0.121064	0.0154062	0.0190211	0.0762696	0.100205	-0.018348	0.0450058	0.0543523	-0.00487034	-0.0328803	0.0778061
RABL6	blue	blue	0.149288	0.166885	0.0884206	0.0756724	0.0981352	0.0629542	-0.0217895	0.0716231	0.115116	0.01023	0.00153368	0.0601651	0.00501215	-0.0310886	0.128515
PI4K2B	blue	blue	0.103267	0.11894	0.0528052	0.0683433	0.0622721	0.0106412	0.0102496	0.0311319	0.0711778	0.000857657	0.00192672	0.0153033	0.0069059	0.0235194	0.129948
KANK1	blue	blue	0.0978518	0.121771	0.0657514	0.0398047	0.103043	-0.0081148	-0.0404366	0.0415503	0.0764854	0.0304806	0.0561991	0.0270824	-0.0106162	0.00155201	0.119656
TRIM36	blue	blue	0.261328	0.44664	0.337275	0.0941786	0.180346	0.0478393	-0.142329	0.0755551	0.313698	0.0164949	-0.135283	0.0814358	-0.127972	-0.18589	0.350501
CPSF2	blue	blue	0.115085	0.126776	0.0920143	0.0497508	0.0891591	0.0458542	0.0218869	0.0843428	0.0952581	0.0137394	-0.0105811	0.0519456	-0.00370579	-0.0380314	0.0993843
PPP5C	blue	blue	0.110985	0.13662	0.0977548	0.0761615	0.0267482	0.0481741	-0.00872894	0.00966987	0.0592838	0.00241701	-0.0606063	-0.00495732	-0.00490381	0.00659637	0.128761
SCARB1	blue	blue	0.125183	0.203262	0.114308	0.0505791	0.0807253	0.0239931	-0.0423563	0.0500301	0.150048	-0.049312	-0.0492275	0.0577711	-0.0627998	-0.0522663	0.167698
EXOC6	blue	blue	0.149108	0.269854	0.130742	0.0484191	0.121814	0.0302115	-0.0808131	0.0582184	0.205889	-0.0756442	-0.0538892	0.0825333	-0.0821765	-0.109821	0.198437
OGA	blue	blue	0.102459	0.133094	0.10128	0.061301	0.0615846	0.0130587	-0.0401824	0.0396548	0.0925508	0.0511656	-0.0140612	0.0443945	-0.0288194	-0.0325005	0.108876
RDH10	blue	blue	0.070725	0.0621014	0.0163087	0.0557702	0.0529051	0.0197945	-0.0318305	0.0352199	0.0595611	0.0227024	0.126217	0.0843505	0.0659343	0.0278403	0.0936705
ENSMFAG00000029000	blue	blue	0.0489747	0.058218	0.0352573	0.030309	0.0442592	0.00287529	0.00338541	0.0265715	0.034413	0.0281971	0.00275794	0.00835765	-0.00509881	0.00785624	0.0577674
SIPA1L1	blue	blue	0.132176	0.227039	0.0519857	0.0171293	0.169134	0.00582	-0.097925	0.0677407	0.198448	-0.0720847	0.0651679	0.105546	-0.060814	-0.0635559	0.158498
SWAP70	blue	blue	0.0988998	0.170894	0.00324095	0.0178776	0.177289	-0.038461	-0.0498784	0.0478817	0.141292	-0.0520347	0.118618	0.0667831	-0.0288074	-0.00839834	0.136176
EVL	blue	blue	0.0913289	0.111104	0.035901	0.0365882	0.0925426	-0.00665098	-0.00356583	0.0520604	0.0788785	0.00924254	0.0611195	0.0398356	0.00425119	-0.00313678	0.110248
SYK	blue	blue	0.103058	0.126397	0.0714843	0.0480545	0.0594028	0.0486891	-0.0394726	0.0506525	0.113914	-0.0185903	-0.017216	0.0792047	-0.0300423	-0.0430569	0.0900869
ZCCHC17	blue	blue	0.145418	0.152991	0.0737981	0.0577235	0.0908569	0.0550023	0.0152987	0.0702203	0.107271	0.0116155	-0.00492965	0.0592322	-0.019023	-0.0249014	0.114384
ANAPC11	blue	blue	0.199375	0.213017	0.0895892	0.0726167	0.173951	0.0323882	0.0466299	0.11835	0.14798	0.0094768	0.0512459	0.0657045	-0.017348	0.00477718	0.186844
NTRK2	brown	brown	-0.0767162	-0.123021	-0.0231148	0.0570479	-0.189862	-0.0759137	0.0988505	-0.17979	-0.237673	0.117259	-0.109883	-0.236228	0.0624711	0.289577	0.00717367
CEBPB	brown	brown	0.0307764	0.0225411	-0.108029	0.0624972	0.0669418	-0.00262404	0.0515558	0.0233123	-0.0035083	-0.0548039	0.137657	0.0116906	0.0921317	0.175045	0.0924831
VPS13C	brown	brown	0.0213817	-0.00220392	-0.0347421	0.0483322	-0.000643581	-0.0437403	0.0492536	-0.0485244	-0.0726491	0.0393585	0.0370601	-0.0934842	0.046706	0.149534	0.0615057
MBTPS1	brown	brown	0.0587472	0.0502699	0.0377312	0.0660989	-0.0024909	-0.0342381	0.0204073	-0.0566271	-0.0372362	0.0678065	-0.0083111	-0.0998916	0.0275971	0.132261	0.116882
CFAP298	brown	brown	0.0573042	0.0671776	0.0205897	0.0482637	0.03246	-0.031134	0.0321095	-0.0195865	-0.00436875	0.0180572	0.0063161	-0.0589086	0.0121838	0.109967	0.114986
UBTF	brown	brown	0.0601011	0.0317998	0.0185486	0.0752935	0.0151479	0.0372768	0.0673862	0.0139735	-0.0240496	0.0388476	-0.0181679	-0.0518698	0.0502848	0.0873419	0.0648022
NBL1	brown	brown	0.0471099	0.0304866	-0.0549951	0.0355976	0.0424207	-0.00399502	0.0740009	0.0120796	-0.00637229	-0.0273439	0.0447772	-0.0180314	0.0393872	0.125051	0.0534342
BCL6	brown	brown	0.0284247	0.0239076	0.0417198	0.0648964	-0.0549925	-0.043261	-0.0209277	-0.0992721	-0.0484716	0.0412611	-0.0186717	-0.0861107	0.00664914	0.159673	0.0985004
BCL11A	brown	brown	-0.0209879	-0.0318606	-0.0556751	0.0296902	-0.041278	-0.0880129	0.0809629	-0.094925	-0.116486	0.0429848	-0.00581069	-0.159457	0.0365236	0.215699	0.0650169
ANK3	brown	brown	-0.0557961	-0.0739183	-0.193931	0.00495172	-0.016356	-0.0786059	0.0265637	-0.0948601	-0.106487	-0.0512243	0.118845	-0.0938505	0.060735	0.225131	0.00648824
SSBP2	brown	brown	0.0274982	0.0392744	-0.0212723	0.0469098	-3.56584e-05	-0.0191715	0.0346203	-0.0323577	-0.016614	-0.0132601	-0.00732445	-0.0613231	0.0206906	0.112588	0.0875974
PLK2	brown	brown	-0.0253618	-0.0635186	-0.180196	0.0881257	-0.0570364	-0.0272841	0.119812	-0.0989972	-0.1377	-0.0375826	0.0287746	-0.136068	0.106418	0.371022	0.0381214
IRX5	brown	brown	-0.0409037	-0.0700554	-0.151423	0.033819	-0.0111718	-0.0417334	0.0641235	-0.0189913	-0.0934274	-0.0391772	0.106648	-0.0607449	0.0864341	0.186265	-0.00848662
GSTT2	brown	brown	0.0250226	0.0116897	-0.00772493	0.0177908	0.0168146	-0.0317103	0.0605034	-0.00173374	-0.0362065	0.0212031	0.00522749	-0.0546708	0.0191781	0.086969	0.0426235
BOC	brown	brown	0.0293993	0.02618	0.0795147	0.0960601	-0.0804588	-0.0685348	0.0305198	-0.127264	-0.1214	0.144452	-0.085352	-0.20162	0.0415834	0.227251	0.155282
CCDC149	brown	brown	0.0547104	0.0559224	0.0162775	0.0684168	-0.00275703	-0.00522645	0.0219183	-0.030695	-0.012128	0.000859961	-0.0175862	-0.0531308	0.0257741	0.117765	0.114387
NKTR	brown	brown	0.054689	0.0473022	0.0339095	0.0627856	-0.00328041	-0.0261677	-0.00598106	-0.0394046	-0.0109891	0.046957	-0.00976728	-0.0548785	-0.0117635	0.0869248	0.0855377
TXNIP	brown	brown	-0.0921566	-0.0573626	-0.225072	-0.00167955	-0.083976	-0.312254	0.0770107	-0.311383	-0.249872	-0.0260165	0.0802399	-0.397698	-0.0133907	0.507781	0.147095
FRY	brown	brown	0.0261588	0.053506	-0.0776305	0.0128737	0.0146823	-0.0320705	-0.0246076	-0.0443823	0.0327205	-0.104608	0.0386065	-0.00581049	-0.014971	0.123889	0.068258
ATP1B3	brown	brown	0.126001	-0.000547206	0.0713413	0.208316	-0.0439382	0.0934086	0.175133	0.016494	-0.124067	0.187243	-0.0206884	-0.104987	0.171685	0.2541	0.138531
GADD45G	brown	brown	-0.0101252	0.00244279	-0.099555	0.0832342	-0.0438424	-0.0632287	0.0229986	-0.121079	-0.10815	-0.0465136	0.0369284	-0.165706	0.0509374	0.341582	0.140536
CAPS	brown	brown	-0.00738718	-0.0134004	-0.0465047	0.0135921	-0.00991989	-0.0525793	0.0823563	-0.0535473	-0.0701173	0.0237398	0.0059113	-0.0967686	0.0286998	0.169425	0.0422967
CITED2	brown	brown	-0.0537985	-0.0405577	-0.116066	0.0178682	-0.0699409	-0.122334	0.0977151	-0.143738	-0.137471	-0.0209448	-0.0080272	-0.191823	0.0273705	0.341563	0.0672844
MT-ND2	brown	brown	-0.172818	-0.211356	-0.0527842	0.11475	-0.365017	-0.0450136	-0.119595	-0.324779	-0.302976	0.0474139	-0.105817	-0.238246	0.0716915	0.369192	-0.0569803
ENSMFAG00000045677	brown	brown	0.0109122	0.00424907	0.00806775	0.0357331	-0.0341807	-0.0076256	0.00250622	-0.0574778	-0.0413922	0.0273078	-0.0202019	-0.0561374	0.0188305	0.0800648	0.0386825
MXRA5	brown	brown	-0.0348163	-0.086462	0.0591035	0.0505647	-0.140332	-0.0419127	0.0918188	-0.128628	-0.194471	0.219717	-0.116319	-0.208164	0.0722628	0.186007	0.0207075
MAP3K20	brown	brown	-0.0429798	-0.107719	-0.0474667	0.0497133	-0.109877	0.0277055	0.0711467	-0.057222	-0.132961	0.0395286	-0.0604323	-0.0746469	0.0852449	0.146406	-0.0586835
GSTM2	brown	brown	-0.0474771	-0.057456	-0.0711749	-0.00278059	-0.0610512	-0.0892736	0.0866604	-0.0878373	-0.117842	0.0200979	-0.0386101	-0.143093	0.0204785	0.193053	0.00479853
MAFB	brown	brown	0.00739531	0.0508329	-0.120277	0.0527426	0.0137243	-0.080416	0.0555857	-0.0714501	-0.036014	-0.118481	0.0174039	-0.123311	-0.00765256	0.300443	0.140556
OAT	brown	brown	0.00297537	-0.0447999	-0.067604	0.068579	-0.0615084	-0.0404351	0.103693	-0.0879974	-0.130394	0.0467905	-0.00351821	-0.140687	0.0661585	0.25874	0.0628452
SERTAD1	brown	brown	0.0343052	-0.00777135	-0.15429	0.142464	-0.0104118	0.0674642	0.0683082	-0.0200714	-0.0558308	-0.0811961	0.103845	-0.0191515	0.151104	0.317126	0.110702
IL20RB	brown	brown	0.0413641	0.0945856	-0.0153298	0.042405	0.0369632	-0.112677	0.00722111	-0.0953033	-0.0274069	-0.00564418	0.0112604	-0.144361	-0.0321526	0.207307	0.159286
TENT5A	brown	brown	-0.0410879	-0.0492538	-0.178827	0.0192747	-0.00860553	-0.120289	0.0235808	-0.103585	-0.0961367	-0.0679432	0.139306	-0.116348	0.0386971	0.292315	0.055273
STOM	brown	brown	-0.00607507	-0.0408033	-0.0706406	0.0637306	-0.0482651	-0.00630366	0.049706	-0.0564423	-0.0886468	-0.0138342	0.0228829	-0.0781476	0.0509673	0.164901	0.0208628
TSPYL2	brown	brown	-0.0529369	-0.0930378	-0.0415638	0.0411619	-0.120813	-0.0199637	0.0397187	-0.113109	-0.140516	0.046865	-0.0586394	-0.127782	0.0496897	0.176405	-0.0166082
ZSCAN18	brown	brown	-0.00471274	-0.000141562	-0.0116133	0.0310086	-0.048565	-0.0293618	-0.00121831	-0.0785838	-0.0495417	0.00384696	-0.0238259	-0.0769063	-0.00516077	0.122472	0.0470777
TTC19	brown	brown	0.0100493	-0.000424789	0.0200079	0.0911015	-0.0785418	-0.00148901	-0.00663356	-0.0778941	-0.0635778	0.0216129	-0.0377528	-0.0802375	0.0362852	0.129527	0.0713757
ADD3	brown	brown	0.0429622	0.0419256	-0.0467684	0.0257065	0.0734103	-0.0613613	-0.00304845	-0.0196582	-0.00427683	0.00690886	0.140274	-0.0266805	0.0271338	0.138386	0.0905835
GRINA	brown	brown	0.00181843	-0.016252	-0.0155131	0.0283273	-0.0305242	-0.0444957	0.0534449	-0.055489	-0.0723273	0.0306798	-0.0101672	-0.0955021	0.0117095	0.12971	0.0588751
FKBP9	brown	brown	0.0189325	-0.0183773	0.0611855	0.058539	-0.0702678	-0.00289228	0.0461219	-0.0740464	-0.0836545	0.108561	-0.0653637	-0.0984869	0.0393345	0.133626	0.0437345
DST	brown	brown	0.0272825	-0.00871023	0.233303	0.165812	-0.227977	-0.141968	0.117414	-0.27153	-0.275123	0.379442	-0.275435	-0.41271	0.0519362	0.381819	0.232088
ZNF331	brown	brown	0.0237054	0.0168681	0.00282202	0.0339874	-0.00871587	-0.0361373	0.0240252	-0.0564077	-0.0393352	0.0369605	-0.00173365	-0.0751143	0.019283	0.102243	0.0666066
MT-COX3	brown	brown	-0.239406	-0.232031	-0.08224	0.10323	-0.433644	-0.0889892	-0.191779	-0.43313	-0.361216	0.0288388	-0.153179	-0.334028	0.0635443	0.441957	-0.0463166
GSTM5	brown	brown	-0.150976	-0.229673	-0.247888	0.0368907	-0.181602	-0.136303	0.266313	-0.219013	-0.35759	0.0271336	0.00388838	-0.33345	0.118614	0.491143	-0.0335266
APLP2	brown	brown	0.0667846	-0.0340121	0.0293576	0.109678	0.00711255	0.0330213	0.0733036	0.00744168	-0.0749174	0.154545	0.0625174	-0.0407396	0.118902	0.144798	0.0353988
FUOM	brown	brown	-0.0209465	-0.0704714	-0.148264	0.0325125	0.00442092	-0.012724	0.115931	-0.0123183	-0.102708	-0.0233645	0.0948003	-0.0693999	0.0937281	0.180741	-0.0145265
TEF	brown	brown	0.0518548	0.0957637	0.0498309	0.0488991	-0.015402	-0.0631147	-0.032191	-0.101302	-0.00900048	0.0288188	-0.0409015	-0.100095	-0.0263786	0.137652	0.160473
IMPAD1	brown	brown	-0.0411438	-0.0996953	-0.152085	0.0440373	-0.0892178	-0.0284009	0.135385	-0.103398	-0.147798	-0.0414638	-0.000842394	-0.125206	0.0755056	0.283824	-0.00666051
BCL7C	brown	brown	0.0503653	-0.00635285	-0.0119871	0.0641934	-0.0148761	0.0498043	0.113125	0.00741197	-0.0660298	0.0356793	-0.0359378	-0.078998	0.0719823	0.114496	0.0210815
MPHOSPH8	brown	brown	0.0417967	0.0261299	0.00466591	0.0729495	-0.0223768	-0.014206	0.0263236	-0.0618448	-0.0495073	0.0414063	-0.0279792	-0.101108	0.0232077	0.138028	0.094265
PEX14	brown	brown	0.0365959	0.0306896	-0.00385898	0.0398108	0.0205434	0.0103532	0.0183419	0.00464833	0.0114904	-0.00887839	0.00511411	-0.00663113	0.0196183	0.0463616	0.046574
TSPO	brown	brown	0.153707	0.0803347	0.0270787	0.136965	0.0810015	0.0252604	0.248742	0.0631466	-0.0407353	0.0698078	0.033143	-0.0921831	0.0836222	0.253143	0.180255
CCNI	brown	brown	0.0959962	0.0793968	-0.000716652	0.0434125	0.0928312	-0.0521445	0.111272	0.00928041	0.0237887	0.0495652	0.0589198	-0.0393605	0.0133658	0.143466	0.141767
TNFAIP8	brown	brown	0.0346504	0.00653035	-0.0501035	0.0222169	0.0636192	-0.0553735	0.0572422	0.0112161	-0.0378582	0.0386958	0.11013	-0.0517027	0.0408117	0.12217	0.058594
VEZF1	brown	brown	0.0624568	0.0284876	0.0438219	0.103323	-0.0507221	-0.00596044	0.0535471	-0.0569261	-0.0605067	0.0747875	-0.0462543	-0.0961987	0.0483968	0.169578	0.0982801
TSC2	brown	brown	0.0601498	0.0641397	0.0862923	0.105051	-0.0654703	-0.0227658	0.0333123	-0.0847545	-0.0553653	0.0839489	-0.0909376	-0.129547	0.0310354	0.177043	0.166632
SMAD5	brown	brown	0.0310128	3.69328e-05	-0.0110317	0.0694625	-0.0305384	-0.0115647	0.0634475	-0.0374443	-0.0677251	0.0421142	-0.0394635	-0.09176	0.0542121	0.149097	0.0489108
PTPN6	brown	brown	0.0601244	0.0524508	-0.00128008	0.060247	0.0254901	0.00457903	0.0105465	-0.0185675	-0.00700215	-0.0025977	0.0230894	-0.0448497	0.0296569	0.109661	0.0905754
P4HTM	brown	brown	0.039263	0.0441498	-0.0473466	0.0292557	0.0475553	-0.0355118	-0.00177004	-0.0223518	0.0112728	-0.0468158	0.0870819	-0.00678306	0.00202625	0.101233	0.0666463
GNAI2	brown	brown	0.0930486	0.0455105	0.0351686	0.0910287	0.0209199	0.0111117	0.108205	0.0154613	-0.0411864	0.113638	-0.0298908	-0.0839786	0.0788097	0.156478	0.115323
SRSF11	brown	brown	0.134742	0.103658	0.0711912	0.120084	0.0350109	0.0246598	0.0613479	0.00914288	0.0103129	0.0689473	-0.03481	-0.0581884	0.0371183	0.118412	0.144079
RNPEP	brown	brown	0.0424762	0.0511262	-0.0157187	0.00174288	0.0727195	-0.0618251	0.0157663	-0.00350048	0.0117042	0.0289984	0.0745637	-0.0264376	-0.00155753	0.0831864	0.0825964
PHGDH	brown	brown	0.0134316	-0.0254234	0.0342723	0.0681315	-0.090995	0.0250867	0.0736653	-0.0673143	-0.0984404	0.0858807	-0.0922001	-0.112101	0.0450825	0.134096	0.0244823
NFKBIZ	brown	brown	0.00549913	0.0200318	-0.16407	0.0267783	0.0506763	-0.0179861	-0.0718482	-0.00875612	0.0558239	-0.144533	0.204187	0.0942382	0.0408012	0.172378	0.0749631
ITFG2	brown	brown	0.0231753	0.0169594	0.00877746	0.0448147	-0.0206431	-0.0322783	0.0293742	-0.0615417	-0.0436161	0.0243889	-0.0151675	-0.0757195	0.0211414	0.122895	0.0607622
SESN3	brown	brown	-0.058161	-0.0989491	-0.0725597	0.0168212	-0.0969857	-0.112861	0.129773	-0.115308	-0.173358	0.0808802	-0.0314504	-0.191495	0.048729	0.22445	0.000120377
NRIP1	brown	brown	0.00476514	-0.052913	-0.100028	0.0617424	-0.0310524	0.0221513	0.0542406	-0.0290865	-0.077813	-0.0012634	0.0585674	-0.0359961	0.0835042	0.172212	0.00834631
MYLIP	brown	brown	0.0746456	0.095828	-0.074567	0.0985288	0.0499979	-0.0663284	0.00719643	-0.0568619	-0.00893599	-0.0472987	0.106445	-0.0872411	0.049084	0.264239	0.20507
NR3C1	brown	brown	0.0033496	-0.00634284	-0.0150239	0.0350993	-0.0248522	-0.046411	0.0343504	-0.0557146	-0.0672629	0.0341956	-0.00558874	-0.0868867	0.0225712	0.135079	0.0439697
GSTM3	brown	brown	-0.0617515	-0.0972066	-0.108034	0.0202545	-0.0913802	-0.0301316	0.0915908	-0.0905688	-0.136469	-5.58048e-06	-0.0175834	-0.112207	0.0612782	0.207255	-0.0299581
PHF3	brown	brown	0.0343067	-0.00300566	0.00375034	0.0730295	-0.0321503	-0.0325111	0.0451712	-0.0519373	-0.0695043	0.0694568	-0.0054526	-0.0900077	0.0360589	0.137587	0.0556315
DPYSL3	brown	brown	-0.0842716	-0.20472	-0.156226	0.0604128	-0.134046	-0.0342123	0.174568	-0.0933728	-0.26883	0.13656	-0.0412827	-0.209245	0.1383	0.301192	-0.101491
ENSMFAG00000032893	brown	brown	0.152565	0.19517	0.097835	0.129596	-0.00967914	0.028318	0.162593	-0.0516619	0.0199556	-0.0376475	-0.179551	-0.136428	-0.0132726	0.247596	0.238747
STMN1	brown	brown	0.0908813	-0.0377906	-0.0197941	0.146967	-0.0220463	0.0595402	0.127353	0.0199051	-0.125374	0.128765	-0.0224343	-0.107068	0.114925	0.198136	0.0436045
SOX4	brown	brown	-0.00208194	-0.0344138	-0.039546	0.0131375	-0.00454881	-0.0749411	0.0473339	-0.033524	-0.070964	0.0929041	0.0195279	-0.0820949	0.0435815	0.129345	0.0337736
SSPN	brown	brown	0.0122532	0.0214546	0.0319865	0.0261979	-0.0353839	-0.040515	0.0353639	-0.0735419	-0.0514423	0.0556592	-0.0495168	-0.0947689	0.00936877	0.122394	0.0828341
ENSMFAG00000037520	brown	brown	0.0763875	0.0547072	0.0454851	0.143607	-0.0431286	-0.00881139	-0.00151801	-0.0825449	-0.0320805	0.0592753	-0.0217076	-0.0724265	0.0525701	0.227283	0.170896
EHBP1	brown	brown	0.0342924	0.0142835	-0.0311345	0.0532272	0.0198016	-0.0307865	0.0493508	-0.0197094	-0.031948	0.0311912	0.0396557	-0.0538917	0.0270857	0.136969	0.0831998
NFIC	brown	brown	0.0267595	0.0112539	-0.0144351	0.0878017	-0.0526427	-0.0192353	0.0696168	-0.0865398	-0.0875647	0.0327651	-0.0503422	-0.132344	0.0482382	0.213429	0.0757462
RERG	brown	brown	0.0390411	0.0593199	-0.112838	0.0423917	0.0467552	-0.0851512	0.00493739	-0.0669902	-0.018543	-0.083656	0.138276	-0.083803	0.0189715	0.228774	0.148115
ENSMFAG00000022844	brown	brown	-0.0171468	-0.0714189	-0.171826	0.0441814	-0.0173263	-0.062888	0.0989471	-0.0771161	-0.126519	-0.0135774	0.127695	-0.11397	0.0889162	0.291236	0.021622
ZFP36L2	brown	brown	-0.0600437	-0.113191	-0.0242563	0.0992116	-0.162849	-0.0558275	0.11544	-0.186989	-0.236704	0.132839	-0.0836383	-0.242304	0.115645	0.336982	0.0345749
HSCB	brown	brown	0.0242311	0.0259971	-0.00835496	0.0153624	0.0206421	-0.0378217	0.0540748	-0.0264009	-0.0232279	0.0138403	0.0101118	-0.0533801	0.0252281	0.0968588	0.0701451
MEIS2	brown	brown	-0.0466051	-0.0583152	-0.0875279	0.0376969	-0.0804695	-0.134655	0.0637084	-0.159704	-0.162689	0.0566841	-0.0189719	-0.215416	0.0204954	0.293444	0.0674511
ABCA1	brown	brown	0.0143334	-0.0262727	-0.0433281	0.0424342	-0.030044	-0.0323869	0.0149592	-0.056171	-0.0642983	0.0466076	0.0531728	-0.0391386	0.0523589	0.15709	0.0527594
ENSMFAG00000046691	brown	brown	0.00725483	-0.095863	-0.0276593	0.1349	-0.146213	0.0726438	0.193145	-0.0600764	-0.170907	0.0695629	-0.101692	-0.13389	0.14258	0.265573	0.0241307
MAP3K6	brown	brown	-0.00897258	-0.00453048	-0.0466427	0.0222765	-0.00534635	-0.0351395	0.00663939	-0.0342384	-0.0311466	-0.0365779	0.022395	-0.0384672	0.0207436	0.0946383	0.0263019
EGR1	brown	brown	0.057073	0.0978006	-0.0596137	0.0974595	0.0600665	-0.065595	-0.0266609	-0.0719416	-0.00962584	-0.0135356	0.118598	-0.0745231	0.0710026	0.301086	0.249435
ENSMFAG00000001369	brown	brown	0.0281333	-0.0364427	-0.131409	0.065294	0.0520302	-0.0429799	0.158106	-0.0234008	-0.110084	0.0666496	0.146717	-0.0979926	0.130644	0.296126	0.053863
ENSMFAG00000044567	brown	brown	0.0576434	0.0296132	0.0479027	0.124074	-0.0948607	0.0518794	0.0687615	-0.0818391	-0.063894	0.0568625	-0.107045	-0.101022	0.0654055	0.190167	0.107186
ENSMFAG00000030232	brown	brown	0.0136371	-0.03853	-0.0848359	0.107636	-0.0370709	0.0495172	0.081013	-0.0298682	-0.0900016	-0.0108839	0.0154366	-0.0655533	0.125658	0.214315	0.0397451
TNFSF10	brown	brown	-0.00588676	-0.00226832	-0.105905	0.00659802	0.0194008	-0.208509	0.091091	-0.150532	-0.135722	0.0858499	0.0761364	-0.239205	0.0131425	0.326254	0.139072
TERF1	brown	brown	0.0366906	0.00712154	-0.0121771	0.0589108	-0.0120936	-0.00908908	0.0613339	-0.0258669	-0.0585654	0.0453402	-0.0163003	-0.0854271	0.0295969	0.122145	0.0579431
NUFIP2	brown	brown	0.00498992	-0.0210222	-0.031535	0.0655736	-0.0466529	0.0107247	0.029296	-0.0413684	-0.0384695	-0.0117548	-0.00616254	-0.0260457	0.045786	0.124589	0.0227442
PDE4D	brown	brown	-0.000598528	-0.0298859	-0.0736888	0.0378324	-0.00631688	-0.0315529	0.03514	-0.0351689	-0.0692242	0.00698688	0.0322964	-0.074347	0.0366177	0.135256	0.0329281
EVA1C	brown	brown	-0.072671	-0.129678	-0.147451	0.0573851	-0.119624	0.0470926	0.0971291	-0.06583	-0.169198	-0.0246207	-0.0164634	-0.116515	0.119365	0.217652	-0.0663331
BEX1	brown	brown	-0.0195523	-0.0586962	0.0356521	0.0446433	-0.0877307	-0.0361218	0.0837705	-0.0849376	-0.124151	0.118737	-0.0980547	-0.130061	0.03349	0.137	-0.0025681
PHIP	brown	brown	0.0463732	0.0444112	0.00909151	0.0735784	-0.0211468	-0.0669614	0.0112046	-0.10491	-0.0531782	0.0289607	-0.00581305	-0.114827	-0.0096853	0.189163	0.102554
ACOT13	brown	brown	0.0400227	0.0412037	0.0208028	0.0383326	0.0259113	-0.0186341	0.0503855	-0.0019327	-0.0127915	0.0318542	-0.00322755	-0.0532437	0.0143767	0.100818	0.0793661
HEXIM1	brown	brown	0.00106613	-0.000754339	-0.0758874	0.0728563	-0.0496823	-0.0407564	0.0395968	-0.088586	-0.0645929	-0.0404848	0.00608738	-0.090292	0.040812	0.258662	0.0965291
BEND5	brown	brown	-8.46498e-05	0.00557497	0.077694	0.0367749	-0.0848475	-0.0997029	0.0853057	-0.135884	-0.121021	0.128033	-0.117759	-0.19352	-0.00407677	0.191653	0.100453
C12orf57	brown	brown	0.114583	0.0307231	0.036996	0.111	0.0427507	0.0515662	0.196223	0.0682855	-0.051842	0.119675	0.0131411	-0.0682852	0.11642	0.146007	0.0983034
KRT15	brown	brown	-0.271431	-0.333497	-0.401401	0.00406608	-0.2762	-0.291075	0.197161	-0.391479	-0.509518	0.0300258	0.0611171	-0.495927	0.14458	0.672677	-0.0380772
ASCL2	brown	brown	-0.00742347	-0.0185969	0.0100672	0.0461664	-0.0514411	-0.051952	0.0909371	-0.0706194	-0.112418	0.0769965	-0.0640699	-0.156841	0.0203038	0.174339	0.0693563
FMC1-LUC7L2	brown	brown	0.129328	0.0991729	0.0872972	0.125839	0.0187747	0.043501	0.0967648	0.00885919	0.0102702	0.0785854	-0.0637227	-0.0583487	0.027823	0.106463	0.146425
VAV3	brown	brown	0.0314687	0.0508723	-0.0254415	0.0664606	0.00098107	-0.108711	0.0461223	-0.0968199	-0.0835679	0.0466501	0.0176505	-0.183383	0.00853673	0.248668	0.152608
ROGDI	brown	brown	0.0523607	0.0773264	0.000113215	0.0628093	0.00572322	-0.0611848	0.0551695	-0.0703442	-0.0369772	0.00244551	-0.0129802	-0.124381	0.00756779	0.221301	0.17742
SPRY2	brown	brown	-0.00120279	-0.0216496	0.0234472	0.0463233	-0.0674879	0.0202799	0.0676108	-0.0567598	-0.0734386	0.041322	-0.0800957	-0.0744194	0.0463598	0.109065	0.0176828
TP53I13	brown	brown	0.0176301	-0.00451297	0.00105287	0.0423628	-0.0132258	-0.0366263	0.0616248	-0.0340559	-0.07188	0.0726393	-0.0161343	-0.111937	0.0270274	0.127515	0.0588744
FUS	brown	brown	0.0550879	-0.0159246	-0.0225377	0.14632	-0.0436942	0.117078	0.051398	0.00893934	-0.0724851	0.0345454	0.000326712	-0.0365112	0.140761	0.17534	0.0464138
APC	brown	brown	0.0620567	0.0773252	0.068058	0.0707697	-0.0152993	-0.0346645	-0.00599571	-0.0684562	-0.0256156	0.06731	-0.0429344	-0.0989736	0.0120671	0.121588	0.147031
GRASP	brown	brown	-0.102218	-0.113381	-0.111318	-0.00736996	-0.114506	-0.0957916	0.0724161	-0.143012	-0.157725	0.00864503	-0.0451305	-0.156414	0.026499	0.240058	-0.0317988
SLC26A2	brown	brown	-0.00745539	-0.00115992	0.0198492	0.0291888	-0.0597598	-0.0638002	0.0373612	-0.0910629	-0.0745373	0.0451562	-0.0697929	-0.125749	-0.00673775	0.162502	0.0552719
ENSMFAG00000040651	brown	brown	0.110409	0.0397057	-0.00275796	0.132482	0.0248592	0.0541316	0.171194	0.0371927	-0.0579553	0.0498795	-0.0344367	-0.0903589	0.0974214	0.179682	0.0925783
RASD1	brown	brown	0.00119566	0.0162896	-0.126835	0.096605	-0.0139431	-0.0797025	0.0180557	-0.104968	-0.0778427	-0.0711297	0.0788927	-0.13208	0.0560334	0.336062	0.141121
ENSMFAG00000045026	brown	brown	0.0378526	-0.095065	-0.0210746	0.0888559	-0.101684	0.000515001	0.595555	0.0014484	-0.211422	0.153206	-0.146401	-0.212678	0.140302	0.322079	0.0599262
SOCS1	brown	brown	-0.0485765	-0.0477439	-0.111482	0.032709	-0.0624446	-0.0702639	0.0495756	-0.111358	-0.109121	-0.0343498	0.01274	-0.135814	0.0349344	0.265018	0.0443518
RETREG1	brown	brown	0.0160531	0.021162	-0.0141727	0.0555202	-0.0748806	-0.0811217	0.0521319	-0.140059	-0.0736395	-0.00507769	-0.0445869	-0.133737	-0.0102425	0.256001	0.113201
RGS2	brown	brown	-0.0989268	-0.115231	-0.0973027	0.00440346	-0.123594	-0.0609517	0.0861523	-0.140287	-0.169058	0.00329402	-0.059163	-0.149968	0.0587331	0.255446	-0.0351851
APOE	brown	brown	-0.155201	-0.260273	-0.15463	-0.0104834	-0.186585	-0.135702	0.258223	-0.176906	-0.342747	0.214178	-0.0936838	-0.30689	0.10521	0.31387	-0.106157
SELENOM	brown	brown	-0.0703141	-0.100028	-0.128521	-0.0319379	-0.0220083	-0.110977	0.0935928	-0.0678328	-0.117103	0.0359868	0.104843	-0.0970849	0.044359	0.146254	-0.037208
CCNG2	brown	brown	-0.0336982	-0.0545898	-0.0946565	-0.000524078	0.00121733	-0.0987488	0.0287584	-0.0636026	-0.0919682	0.0420198	0.0980155	-0.0869694	0.0412829	0.181847	0.031774
SYNE2	brown	brown	0.122583	0.11382	0.144855	0.169957	-0.0549807	-0.0227291	0.0158574	-0.106742	-0.0248148	0.124834	-0.104795	-0.111071	0.0270006	0.182803	0.202237
CCDC85B	brown	brown	0.0528113	0.0583236	0.0366683	0.0603839	-0.000150971	-0.0133571	0.0677707	-0.0247415	-0.0287379	0.0352247	-0.0568718	-0.10158	0.0159808	0.11325	0.110707
SSBP4	brown	brown	0.0192882	-0.0130126	0.00384766	0.0588595	-0.0243779	-0.00544721	0.0597099	-0.03509	-0.0666969	0.0506786	-0.0147948	-0.0844737	0.0477488	0.120509	0.047597
CAPN12	brown	brown	-0.0293189	-0.045631	0.00193623	0.0388888	-0.0680043	-0.0896901	0.0486623	-0.102899	-0.125284	0.0879995	-0.00594327	-0.145198	0.0290133	0.190766	0.0514298
SOCS3	brown	brown	-0.050283	-0.0748294	-0.106254	0.0997273	-0.154543	0.0100234	0.136875	-0.142842	-0.180407	-0.00975628	-0.0757435	-0.175555	0.111101	0.390429	0.0810355
POLG2	brown	brown	-0.0420783	-0.0675394	-0.0358066	0.0383788	-0.089738	-0.0447408	0.0454219	-0.0953097	-0.112617	0.0322727	-0.0384709	-0.112705	0.0358569	0.180828	0.00537338
CACHD1	brown	brown	-0.0358144	-0.0751492	-0.0767402	0.0458339	-0.0501482	-0.0124034	0.0739197	-0.0528722	-0.101625	0.00917757	0.0163464	-0.0757446	0.0736251	0.148401	-0.00219042
PTPRK	brown	brown	-0.0191585	-0.0531186	-0.0829067	0.011324	-0.00821952	-0.0375516	-0.00432035	-0.0330959	-0.0630088	0.0392773	0.103971	-0.0216403	0.0713517	0.128534	-0.00554927
BCAP31	brown	brown	0.0960545	0.0948584	0.102616	0.0684198	0.0405137	0.00231244	0.0622319	0.00802885	0.00711357	0.0815517	-0.0438228	-0.0653696	0.00942336	0.0822524	0.117769
TMEM123	brown	brown	0.0280067	0.0277883	-0.103535	0.0231663	0.0588274	-0.0132146	0.00691905	0.00237075	0.0114031	-0.0710918	0.102229	0.00501482	0.0281573	0.104565	0.0487632
MT-CYTB	brown	brown	-0.285372	-0.3339	-0.198219	0.111996	-0.429938	-0.108108	-0.0930212	-0.431942	-0.482409	0.0560461	-0.0660321	-0.408453	0.159599	0.547	-0.104066
CIRBP	brown	brown	0.134699	0.175708	0.025601	0.0749566	0.0951672	-0.0635501	0.0520029	-0.022972	0.0452454	-0.00885785	0.0243968	-0.0877013	-0.0155184	0.198982	0.234704
AFAP1	brown	brown	0.0234436	-0.00689083	-0.0196243	0.0347335	0.0119346	-0.016825	0.0277763	0.00148702	-0.0413806	0.0679862	0.0388463	-0.0444933	0.0463677	0.0929262	0.0442352
OTX1	brown	brown	0.0678856	0.077115	-0.0105281	0.0647151	0.0402852	-0.044733	-0.00187355	-0.0330974	0.00377286	-0.00677922	0.0481138	-0.0648407	0.00622951	0.140359	0.14275
LMO4	brown	brown	0.112614	0.118405	0.00202674	0.106734	0.0501936	-0.0239776	0.015927	-0.0314539	0.0157044	0.0191285	0.0630106	-0.0539876	0.0556402	0.203885	0.215608
ENSMFAG00000040641	brown	brown	-0.116036	-0.190952	-0.113234	0.0292592	-0.175064	-0.0312655	0.155051	-0.155729	-0.250149	0.0624476	-0.0901604	-0.214147	0.0905961	0.272814	-0.102807
SLC2A14	brown	brown	-0.142938	-0.192832	-0.0952403	-0.0136056	-0.171969	-0.112974	0.0882721	-0.186435	-0.255588	0.119072	-0.0993765	-0.246134	0.0467734	0.268488	-0.101773
ENSMFAG00000042475	brown	brown	0.0841618	0.0378688	-0.0114713	0.115152	-0.00690145	0.025925	0.0478228	-0.0274438	-0.033702	0.0211815	0.00780201	-0.0557059	0.0617737	0.197345	0.113655
TRPM6	brown	brown	-0.0187664	-0.0424613	-0.0874582	0.0653159	-0.067663	0.0117584	0.0403135	-0.0627017	-0.0848398	-0.0398472	-0.00479305	-0.072682	0.0757273	0.176868	0.0119621
MAP2K2	brown	brown	0.0810216	0.0955138	0.0467728	0.0501645	0.0598906	-0.040231	0.0921814	-0.00336868	0.00754807	0.0441961	-0.021132	-0.0885091	-0.00083548	0.119864	0.138521
ENSMFAG00000030224	brown	brown	0.0230113	0.0183641	-0.0336883	0.0464913	-0.00630487	-0.0328224	0.0281327	-0.0341442	-0.0346999	0.00975386	0.0170128	-0.0677322	0.016635	0.137157	0.0587338
ANKRD6	brown	brown	-0.0107253	-0.0571651	-0.0237111	0.0431483	-0.0414338	-0.0184874	0.0621022	-0.0418462	-0.102177	0.0789073	0.0175267	-0.0914175	0.0647193	0.128679	0.00382879
SAT2	brown	brown	-0.00406697	-0.0191553	-0.0971886	0.0153763	0.00816299	-0.0461004	0.0739323	-0.0483264	-0.0647975	-0.0197405	0.0668879	-0.0732314	0.0341172	0.161681	0.0491081
PLTP	brown	brown	-0.139658	-0.216756	-0.117696	0.00963606	-0.192145	-0.0320998	0.124831	-0.159365	-0.266323	0.114323	-0.105048	-0.212832	0.10895	0.23281	-0.135874
CNTN4	brown	brown	0.00083397	-0.00134274	0.01757	0.0467159	-0.0821957	0.0021191	0.0199429	-0.0746964	-0.0604645	0.0187034	-0.0656714	-0.0781499	0.0266663	0.11435	0.0524946
EFNA1	brown	brown	0.0844972	0.0953216	-0.058916	0.106786	0.052024	0.00486142	0.0320914	-0.0122687	0.0139853	-0.0780988	0.0801049	-0.0354462	0.0648905	0.204015	0.191647
UBE4B	brown	brown	0.0444028	0.043325	0.0084607	0.0399266	0.0194445	-0.0405032	0.0171026	-0.0314637	-0.0182776	0.03632	0.0222482	-0.0589644	0.00604623	0.101469	0.0930468
ENSMFAG00000039610	brown	brown	0.00521805	-0.0117251	-0.00402915	0.025496	-0.0207669	-0.0407178	0.0298711	-0.0593479	-0.0629985	0.0541356	-0.0146046	-0.0810429	0.0178456	0.109151	0.0341964
GRIA3	brown	brown	-0.0433745	-0.0747481	-0.208871	0.0287619	-0.018006	-0.0716041	0.0670369	-0.0760427	-0.115003	-0.0922082	0.145975	-0.106348	0.0693275	0.264836	0.0294044
CSRP2	brown	brown	-0.0765452	-0.071143	-0.0633424	0.103228	-0.240944	-0.164796	0.246155	-0.312717	-0.332035	0.0671086	-0.243637	-0.475671	0.0359442	0.554983	0.162157
DHRS7	brown	brown	-0.0287964	-0.0768547	-0.178253	0.00856082	0.0269781	-0.0220984	0.0619394	-0.0206671	-0.0814565	-0.0615967	0.150682	-0.045894	0.104149	0.172885	-0.0285458
DUSP1	brown	brown	0.00365363	0.0152587	-0.140705	0.074942	0.0200205	-0.0933491	0.0642999	-0.0970025	-0.0933278	-0.02646	0.152304	-0.12579	0.107609	0.379931	0.227369
H2AX	brown	brown	-0.0775881	-0.120928	-0.147453	0.045801	-0.120615	-0.0144311	0.116926	-0.114793	-0.178626	-0.0245484	-0.0247205	-0.157935	0.0743315	0.285378	-0.032682
NFE2L2	brown	brown	0.0559036	0.0171769	-0.0583995	0.0483787	0.0435188	-0.0100918	0.075282	0.00467614	-0.000320575	-0.0372371	0.122509	0.0248952	0.0377992	0.156468	0.0862181
EPAS1	brown	brown	-0.130712	-0.15759	-0.0863306	0.0899471	-0.310272	-0.12944	0.160377	-0.347312	-0.362352	0.0687721	-0.208764	-0.428215	0.0888285	0.520685	0.0648431
FOXC1	brown	brown	0.00565234	0.000299386	-0.0425707	0.0440338	-0.00765693	-0.037134	0.010336	-0.0459251	-0.0378376	-0.0165791	0.0450985	-0.0414871	0.050495	0.132284	0.0531241
G0S2	brown	brown	-0.152633	-0.241843	-0.192928	0.0678108	-0.234825	-0.0089997	0.164292	-0.19164	-0.315023	0.0642783	-0.0769137	-0.247914	0.185339	0.396506	-0.0822212
PSIP1	brown	brown	0.0257373	-0.0171969	0.0404586	0.0711471	-0.0728505	-0.0168935	0.0932102	-0.0733815	-0.113855	0.0947323	-0.0930718	-0.141533	0.0381421	0.161304	0.0467246
OSR2	brown	brown	-0.0062788	-0.0498295	-0.243637	0.025293	0.0769454	-0.0865024	0.0555687	-0.0346555	-0.0752091	-0.0980398	0.254078	-0.0669356	0.0731544	0.252353	0.0424499
MT-ND1	brown	brown	-0.234822	-0.238719	-0.079668	0.0784913	-0.405983	-0.0737399	-0.185827	-0.391993	-0.331236	0.0154096	-0.13046	-0.283186	0.0562469	0.376611	-0.0903839
SMC6	brown	brown	0.0746528	0.0436677	0.0184403	0.0792916	0.0259423	-0.0185542	0.0618439	-0.0109878	-0.0214656	0.0714925	-0.0123714	-0.0674626	0.0242798	0.128554	0.0917516
NR1D2	brown	brown	0.0658571	0.107441	0.0672918	0.0713587	-0.0110403	-0.0337474	-0.0129141	-0.0757356	0.0191566	0.00848182	-0.0689677	-0.0729166	-0.0187673	0.11447	0.15525
CLK1	brown	brown	0.0910148	0.0732489	0.0367028	0.103555	0.00549089	-0.0133417	0.0336213	-0.0233636	-0.00184124	0.0377547	-0.0114286	-0.0557089	0.0384194	0.164185	0.157873
TMC6	brown	brown	0.00447091	0.011066	-0.0073875	0.00609691	0.0153092	-0.0350967	0.0156984	-0.0273548	-0.0191368	0.0103123	0.0145529	-0.0420728	-0.0057656	0.054059	0.0361638
DDIT4	brown	brown	-0.04115	-0.0810609	-0.138121	0.00626559	0.0332588	-0.0604382	0.0791609	0.00665759	-0.0989881	0.0356749	0.148031	-0.0565859	0.0781081	0.156504	0.00589555
NINJ1	brown	brown	0.0241494	-0.0205369	-0.0147889	0.0610158	-0.0311822	0.0232205	0.0676069	-0.0200481	-0.0707401	0.0372076	-0.0195773	-0.0758754	0.078574	0.127541	0.0408853
SSBP3	brown	brown	0.0112612	0.0304221	-0.0151154	0.0582483	-0.0109169	-0.0577652	0.0410902	-0.0638916	-0.0432411	0.018444	-0.020527	-0.0943418	0.018491	0.148306	0.0824998
SECISBP2	brown	brown	0.0290006	0.0201207	-0.0273609	0.0387422	0.00988278	-0.0281738	0.0261463	-0.0340551	-0.0274041	0.00198682	0.0126327	-0.0623612	0.0186378	0.111659	0.0457646
SLC27A3	brown	brown	-0.0130427	-0.0440751	-0.0129948	0.0547749	-0.0809248	-0.0301153	0.06635	-0.0763789	-0.102815	0.0410874	-0.0693252	-0.122336	0.0318522	0.137479	0.0147147
DIPK2A	brown	brown	-0.0244153	-0.0268952	-0.0952476	0.0249025	-0.00725767	-0.0370402	0.0117813	-0.0433812	-0.0527053	-0.0346214	0.0637816	-0.0640718	0.0179527	0.132077	0.0219166
CYHR1	brown	brown	0.0460105	0.0711191	-0.00116916	0.0211427	0.042212	-0.0493011	0.0217604	-0.0108362	0.00462546	-6.89234e-05	0.0124003	-0.0608574	-0.00666535	0.0975381	0.0993666
FCGRT	brown	brown	0.0457119	0.046624	-0.027674	0.056395	0.0227621	-0.0356528	0.0472039	-0.0266542	-0.0233676	0.0150728	0.0514915	-0.0679383	0.0337389	0.158675	0.114706
RPL10A	brown	brown	0.103372	0.00130839	0.00301888	0.140543	-0.0270482	0.0739129	0.387181	0.0501627	-0.102566	0.0741146	-0.0776674	-0.118718	0.12955	0.248687	0.0951812
METTL23	brown	brown	-0.0117223	0.000855464	-0.0302487	0.0103095	-0.0186687	-0.0740875	0.0454208	-0.0723422	-0.0529924	-0.00107194	-0.0211079	-0.102027	-0.00256762	0.143442	0.0500206
NOP53	brown	brown	-0.0296692	-0.0750218	-0.0655146	0.0349788	-0.0610364	-0.0579973	0.179328	-0.0615679	-0.140675	0.0776083	-0.0260442	-0.143897	0.0599341	0.20245	0.0224917
SRSF7	brown	brown	-0.0482073	-0.175356	-0.138956	0.16426	-0.228007	0.171337	0.0940132	-0.102133	-0.218997	-0.0266772	-0.0933234	-0.105066	0.198155	0.318239	-0.0966136
HMGB1	brown	brown	0.206871	0.089978	0.12499	0.210814	0.0219551	0.116135	0.174225	0.0632283	-0.0404532	0.172723	-0.0847326	-0.0933594	0.115374	0.162032	0.134814
EPC1	brown	brown	0.0413851	0.0337629	-0.0213462	0.059574	-0.00151622	-0.0245496	0.0401627	-0.0282455	-0.0228319	0.0108876	0.0017792	-0.049595	0.0331836	0.123688	0.0723265
FOS	brown	brown	0.0843	0.149251	0.0439136	0.128224	-0.0366419	-0.170029	0.075556	-0.209866	-0.096362	0.0414612	-0.103193	-0.317499	-0.0451133	0.464819	0.355483
TBCC	brown	brown	0.0357066	0.0343903	0.00304459	0.0338578	0.0151331	-0.0159839	0.0347256	-0.0110941	0.00359313	0.00307451	-0.00559784	-0.0268232	0.00480865	0.0738753	0.0609524
ENSMFAG00000033289	brown	brown	-0.0164378	-0.0612355	-0.0170331	0.0767572	-0.100222	0.018633	0.0641964	-0.0690326	-0.0978564	0.0297456	-0.0506596	-0.0783303	0.0720359	0.152999	0.00544546
ZNF428	brown	brown	0.0314673	-0.00845115	0.0307607	0.0376665	-0.0172995	-0.0134112	0.0955218	-0.0201389	-0.0711619	0.11746	-0.0269703	-0.0874397	0.045166	0.106124	0.0498785
ARID5B	brown	brown	-0.0211467	-0.0693893	-0.0561678	0.0710295	-0.0818598	0.0233515	0.0431996	-0.0746905	-0.101679	0.0386689	0.00990071	-0.0464267	0.0835814	0.163355	0.0128794
MXI1	brown	brown	0.0439677	0.0738267	-0.00479371	0.0462419	0.0378087	-0.0330302	0.0549142	-0.0155517	0.00803191	-0.0142542	0.00440271	-0.057575	0.0102644	0.109286	0.116346
CA12	brown	brown	-0.0894462	-0.199859	-0.139181	0.0461691	-0.130694	-0.0990966	0.203527	-0.110416	-0.289484	0.176913	-0.0439129	-0.261655	0.122984	0.345576	-0.0616383
TCEAL8	brown	brown	0.0664392	0.0462174	-0.00450144	0.0231605	0.0893409	-0.0303538	0.112292	0.0489064	-0.00982637	0.0790103	0.00712463	-0.0631635	0.0221156	0.0696493	0.0687755
FGFR2	brown	brown	-0.0310126	-0.0568212	0.0049895	0.0841532	-0.136401	-0.0804256	0.0747519	-0.180475	-0.189813	0.136716	-0.0998685	-0.239806	0.0530872	0.285104	0.065662
EFEMP1	brown	brown	-0.014307	-0.109639	-0.0864211	0.0988084	-0.0745079	0.0444372	0.0787774	-0.0690051	-0.166945	0.081827	0.0637075	-0.0982063	0.161632	0.23791	-0.0280578
ENSMFAG00000044769	brown	brown	0.0288928	-0.0206535	0.0082701	0.0767484	-0.0271005	0.00390762	0.0839743	-0.0183539	-0.0692407	0.093138	0.00340046	-0.0683239	0.0795192	0.133234	0.0450792
GSTO1	brown	brown	0.0572214	-0.00668587	0.0427783	0.0973796	-0.0453988	0.0079607	0.160576	-0.0301826	-0.110514	0.0983465	-0.0840494	-0.151107	0.0771054	0.18817	0.0747896
OSGIN1	brown	brown	0.0335337	0.0451626	-0.0037463	0.0422155	-0.00067132	-0.0304501	0.0340227	-0.0440877	-0.019313	-0.0128464	-0.00451092	-0.0735397	0.00913765	0.111064	0.0983135
ARHGAP42	brown	brown	1.52627e-05	0.00613778	-0.0566613	0.00810666	-0.00748628	-0.0588663	0.00835221	-0.0522163	-0.0198455	-0.0244264	0.0423253	-0.0406529	-0.00371907	0.11507	0.0511367
LPAR6	brown	brown	0.0549211	0.0483994	-0.0188732	0.0952064	-0.00808633	0.058155	0.0397745	0.0052957	-0.00502144	-0.0526509	-0.02512	-0.0218606	0.0485818	0.105782	0.0670729
JUNB	brown	brown	-0.0140245	0.0237376	-0.179487	0.102574	-0.0633004	-0.0342241	0.0852279	-0.141477	-0.0714755	-0.16993	0.0246233	-0.121237	0.0649743	0.437378	0.189276
RNASET2	brown	brown	0.0110528	0.00680604	-0.139973	0.0451061	0.0250274	-0.0750598	0.0678911	-0.0720985	-0.0707808	-0.0745576	0.125507	-0.10881	0.0577435	0.282433	0.112239
ZSWIM4	brown	brown	-0.0503376	-0.0722207	-0.0422617	0.0297871	-0.0944278	-0.0257656	0.0318617	-0.0859121	-0.0989996	0.0278846	-0.0482277	-0.0833988	0.0381612	0.161405	0.0162697
TMEM9	brown	brown	0.0673357	0.0575616	0.0245844	0.0481844	0.0418094	-0.0334643	0.0585799	-0.00660198	-0.0179679	0.056418	0.00734007	-0.071981	0.0112756	0.107377	0.111139
MCTP2	brown	brown	0.0115114	0.0165166	-0.00255897	0.0472515	-0.0326851	-0.0240717	-0.00737949	-0.0669099	-0.03972	-0.00010611	-0.00859379	-0.0601814	0.019423	0.1214	0.0754642
ANKRD26	brown	brown	0.0115316	-0.0050604	-0.0120146	0.0223124	-0.0116712	-0.0371526	0.0268139	-0.0342678	-0.0499676	0.0426176	-0.000499274	-0.0763983	0.0161944	0.0944912	0.0478742
BEX4	brown	brown	-0.0728175	-0.0769228	-0.0702706	-0.00310214	-0.102823	-0.0831163	0.0825996	-0.135467	-0.141497	0.0288763	-0.0599848	-0.156249	0.0137854	0.214054	-0.0106596
DOCK1	brown	brown	0.0298679	0.013035	-0.00377666	0.0319414	0.0234654	0.000789541	0.0248136	0.00332332	-0.00785113	0.0297037	0.0270878	-0.00753686	0.0330928	0.0483238	0.034889
PGRMC1	brown	brown	0.0146748	-0.0150373	-0.0253702	0.0553656	-0.0222686	0.0107458	0.0560273	-0.0178229	-0.0567117	0.0266406	0.0120147	-0.061367	0.0563031	0.0937162	0.025065
HSPA2	brown	brown	-0.0711213	-0.0945407	-0.0920302	0.0191298	-0.0966758	-0.0528083	0.0941675	-0.0981897	-0.151066	0.00900728	-0.0442623	-0.15646	0.0501994	0.244409	0.00109409
DHODH	brown	brown	0.0315548	0.00916189	0.0265157	0.0582448	-0.0314346	0.0258238	0.0433324	-0.0333135	-0.0327676	0.0227519	-0.0433234	-0.053334	0.0245755	0.08456	0.0480614
SREK1	brown	brown	0.0697394	0.0554055	0.058395	0.0941427	-0.00782897	0.0228079	0.0413304	-0.0132234	-0.0212395	0.053084	-0.0513269	-0.0543972	0.0242019	0.0883678	0.0849329
ZNF703	brown	brown	0.00635565	-0.0411649	-0.0319265	0.0767492	-0.0433895	-0.0418583	0.0823507	-0.0490824	-0.113054	0.0922098	0.00604406	-0.128992	0.0824753	0.196015	0.0602513
DBP	brown	brown	0.062858	0.150321	0.0110471	0.0554117	0.0109671	-0.0931599	0.00300479	-0.120136	0.00376294	-0.0487014	-0.0437524	-0.146524	-0.0255254	0.223911	0.248578
ZNF503	brown	brown	-0.00590284	-0.0450781	-0.0203607	0.0603953	-0.0554353	0.0011762	0.0680346	-0.0445266	-0.0932921	0.0692221	-0.0114611	-0.0804507	0.0794089	0.154384	0.0295181
MT-COX1	brown	brown	-0.154312	-0.225688	-0.12783	0.108417	-0.290064	-0.0165941	-0.0333219	-0.242846	-0.291951	0.0243616	-0.0760624	-0.21912	0.108567	0.371003	-0.100573
ENSMFAG00000041281	brown	brown	0.0181726	0.0565212	0.00862829	0.0422276	-0.0280327	-0.0589754	0.0356226	-0.0751993	-0.0312878	-0.0149627	-0.0369837	-0.0884687	-0.0142589	0.164569	0.135209
DNAJB14	brown	brown	0.0183849	0.00887569	0.00553555	0.0309454	-0.0154691	-0.0284696	0.0189351	-0.0448453	-0.0371808	0.0415514	-0.00846796	-0.0611283	-0.000640232	0.0929747	0.0354405
CLPTM1L	brown	brown	0.0480049	0.0495979	0.0107209	0.0458344	0.00452818	0.00538428	0.00425279	-0.0391288	0.0014702	0.00540305	-0.00232717	-0.0272058	0.0183606	0.0875021	0.0741755
TEPP	brown	brown	0.00318135	0.0128299	-0.111424	0.011602	0.0193468	-0.0420909	0.0353937	-0.0262008	-0.0348937	-0.0734824	0.0466987	-0.0639094	0.0236649	0.147665	0.0755409
TLE5	brown	brown	0.0574013	0.0432826	0.022495	0.0482779	0.0374727	-0.039891	0.0029287	-0.0508668	-0.0128429	0.0836281	0.0648628	-0.0390118	0.0466769	0.101238	0.0705344
PIK3R1	brown	brown	-0.0398886	-0.085649	-0.0834077	0.0515231	-0.0813819	-0.0337917	0.082786	-0.0957651	-0.15048	0.0391561	-0.0225633	-0.14439	0.0674833	0.194175	-0.00859891
MT-ND5	brown	brown	-0.230835	-0.333254	-0.200537	0.126987	-0.359776	-0.0554007	-0.00327366	-0.303933	-0.431878	0.0622701	-0.0487065	-0.321386	0.164629	0.488274	-0.129332
IER2	brown	brown	0.0830747	0.121952	-0.116762	0.129405	0.0371886	0.0135265	0.00381932	-0.0464282	0.0337043	-0.165655	0.0599716	-0.0295128	0.0309596	0.345049	0.212741
H1.10	brown	brown	0.0297229	0.0276395	0.0199651	0.0568523	-0.0251061	-0.0163776	0.0496013	-0.0437304	-0.0458938	0.0364806	-0.0478648	-0.0780468	0.012673	0.12261	0.0846279
NR2F2	brown	brown	0.0563869	-0.00138807	0.0691401	0.079964	-0.0131697	-0.0320434	0.0815331	-0.0280627	-0.0903123	0.172935	-0.0464421	-0.127268	0.0632863	0.139787	0.0816733
NR4A2	brown	brown	-0.0233045	0.0363807	-0.184179	0.0147124	0.0514751	-0.177111	-0.0401998	-0.145893	-0.0365921	-0.0955136	0.216013	-0.10263	0.0356692	0.326486	0.187445
ID2	brown	brown	-0.125879	-0.182462	-0.173246	0.0149949	-0.136672	-0.122518	0.171358	-0.157177	-0.273573	0.0470477	-0.0212372	-0.277886	0.0816651	0.410504	-0.0286491
DDIT3	brown	brown	-0.0378344	-0.0435133	-0.0574875	0.0187288	-0.0474511	-0.0802105	0.0546206	-0.093341	-0.0870398	0.0137423	0.00685218	-0.0959256	0.023143	0.223569	0.0368899
SEMA3C	brown	brown	-0.0424953	-0.114852	-0.0451102	0.0258476	-0.0624249	-0.0741927	0.112444	-0.0552052	-0.168722	0.200129	-0.0162214	-0.162686	0.079183	0.184548	-0.0116865
SLC2A4RG	brown	brown	0.0434141	0.054634	-0.00857817	0.0468248	0.0428648	-0.0316144	0.0565257	0.00403149	-0.0166218	0.00324449	-0.00500631	-0.0723739	0.00772475	0.107615	0.0919657
SLC22A17	brown	brown	-0.00152892	0.00823663	-0.024621	0.0264702	-0.0096514	-0.0397968	0.0263603	-0.0497744	-0.0415894	0.0124917	-0.0113064	-0.0697171	0.0115539	0.125992	0.0408067
AQP3	brown	brown	-0.209843	-0.323729	-0.443888	0.0999075	-0.21237	0.0164747	0.155457	-0.188192	-0.40449	-0.165297	0.185225	-0.250296	0.262027	0.516937	-0.115079
NCKAP5L	brown	brown	-0.0226869	-0.0791041	-0.0405858	0.0531238	-0.0547495	-0.00524693	0.0510395	-0.0572601	-0.109337	0.0719879	0.0180974	-0.0690602	0.0865377	0.154655	0.0106923
NUPR1	brown	brown	-0.0730156	-0.0998854	-0.251143	-0.0306586	0.0256625	-0.13437	0.0661486	-0.076103	-0.118202	-0.0876115	0.235551	-0.0984137	0.0485704	0.249341	0.00370423
ID3	brown	brown	0.0435721	-0.00996013	-0.189917	0.110711	0.0520561	0.00515352	0.163774	0.00109184	-0.0888329	-0.04041	0.129763	-0.0989379	0.158339	0.317039	0.101271
CAMKK1	brown	brown	-0.0139876	-0.0260924	-0.0602874	0.049698	-0.0421398	-0.029049	0.0415281	-0.0661276	-0.0803813	-0.00690868	-0.0122231	-0.0959358	0.0500663	0.169072	0.0280872
ENSMFAG00000032070	brown	brown	0.017277	-0.0102188	0.0543452	0.05298	-0.0677901	0.00666791	0.0663237	-0.0401943	-0.0783406	0.0945426	-0.0763471	-0.0977002	0.057024	0.112072	0.0490202
NME3	brown	brown	0.130119	0.122114	0.041018	0.0953432	0.106606	0.0125005	0.0906648	0.0615417	0.0325098	0.0283687	0.0119756	-0.0352911	0.030542	0.0934239	0.132857
TSC22D3	brown	brown	0.00330747	0.0530749	-0.0102179	0.0404185	-0.0502754	-0.0841951	0.0243683	-0.136795	-0.0596435	-0.00473594	-0.0503017	-0.15483	-0.000591417	0.211146	0.129314
BRI3	brown	brown	0.106885	0.136623	0.0412175	0.0651517	0.0857253	-0.0220879	0.0485656	0.00796342	0.0481599	0.0129529	0.0103961	-0.0335803	0.00425489	0.105309	0.165935
ENSMFAG00000003953	brown	brown	0.0584617	0.0370095	0.0233916	0.0415152	0.0315184	-0.0332324	0.0601673	-0.0133393	-0.0256877	0.0712419	0.0045598	-0.0695543	0.0292664	0.113645	0.102895
MT-ATP6	brown	brown	-0.266218	-0.319129	-0.201435	0.111671	-0.414272	-0.0608816	-0.117381	-0.396625	-0.420139	0.00362405	-0.0455696	-0.321425	0.152784	0.506623	-0.106389
RSRP1	brown	brown	0.0075581	-0.0429878	-0.104945	0.0976428	-0.0211185	0.0172829	0.0659815	-0.00904655	-0.0897162	-0.0169056	0.0441948	-0.0656622	0.117659	0.230442	0.0347211
TP63	brown	brown	0.0803493	0.0910685	0.169502	0.127801	-0.0872975	-0.0552255	0.0533135	-0.144378	-0.0927391	0.143895	-0.176514	-0.212295	-0.00488747	0.221778	0.203222
NR4A1	brown	brown	0.062975	0.183437	0.00136029	0.0943091	0.0439326	-0.135534	-0.0357566	-0.144079	0.0168967	-0.0294608	0.0596817	-0.141857	0.00642619	0.301553	0.3651
RILPL2	brown	brown	0.0297887	0.0136129	0.040913	0.0667282	-0.0354858	-0.0357067	0.0822663	-0.0580863	-0.0667935	0.0803627	-0.0390755	-0.109224	0.027867	0.125445	0.0811387
FGFR1	brown	brown	-0.0202284	-0.0450206	-0.043585	0.0465097	-0.0765936	-0.0284152	0.0239839	-0.0966049	-0.0941101	0.00475499	-0.00495826	-0.0889577	0.0528775	0.17927	0.0283336
ENSMFAG00000002101	brown	brown	0.0333629	0.0448952	-0.0193793	0.115239	-0.0511273	0.0192126	-0.0225878	-0.0731598	-0.0297245	-0.0122862	-0.00279503	-0.0550312	0.0661967	0.197906	0.125655
REX1BD	brown	brown	0.0765664	0.0561063	-0.0496937	0.0487223	0.0882625	-0.00162506	0.0879311	0.0505866	0.00230795	-0.0104028	0.0685621	-0.0427056	0.0228443	0.106904	0.07904
C1orf35	brown	brown	0.047803	0.0384772	0.0142538	0.0414252	0.00256612	-0.00185279	0.0347654	-0.0226145	-0.0166259	0.0160795	-0.0152022	-0.0569173	0.0106218	0.117245	0.0758229
ENSMFAG00000031581	brown	brown	0.0320083	-0.0210045	-0.0126637	0.0636865	-0.0209389	-0.0046745	0.0901272	-0.0159238	-0.0866805	0.0684526	-0.0234216	-0.100971	0.0479147	0.143634	0.028863
ENSMFAG00000001567	brown	brown	-0.00686857	-0.0277146	-0.0847217	0.0392046	-0.00710919	-0.057012	0.0495823	-0.0551597	-0.0616606	-0.00787069	0.0368686	-0.0720393	0.0478987	0.179254	0.0368983
KMT2E	brown	brown	0.0657856	0.0406389	0.0600021	0.125101	-0.0599098	0.0134427	0.0273265	-0.0842456	-0.0504959	0.0692928	-0.0667022	-0.0944365	0.0494006	0.137279	0.124371
ENSMFAG00000037375	brown	brown	-0.0540061	-0.140062	-0.170622	0.0541351	-0.0548917	-0.0375028	0.117997	-0.0938035	-0.194696	0.0717905	0.147217	-0.131555	0.174677	0.298906	-0.0299503
TIMP3	brown	brown	-0.117721	-0.181012	-0.109431	0.0449526	-0.160963	-0.131435	0.190607	-0.180228	-0.280438	0.123046	-0.0929663	-0.293871	0.0995661	0.372468	-0.0448007
ID4	brown	brown	-0.0511128	-0.0284224	-0.0761604	0.0187492	-0.0604472	-0.0885578	0.0262912	-0.105116	-0.0951253	-0.0275038	-0.0135909	-0.135456	0.00990377	0.238868	0.0523546
CD164L2	brown	brown	-0.0396286	-0.0324939	-0.109276	-0.0384816	0.0376602	-0.0632986	0.0328902	-0.0238504	-0.0374936	-0.052525	0.0863698	-0.0352729	0.0103707	0.0741796	-0.00914012
NUCKS1	brown	brown	0.172216	0.145904	0.14186	0.127985	0.0418889	-0.0287786	0.100599	-0.00227243	0.00580982	0.119938	-0.0884425	-0.119339	-0.00293019	0.178868	0.214846
IER3	brown	brown	-0.025862	-0.0608257	-0.121944	0.00453251	0.0523643	-0.11912	0.121477	-0.017272	-0.0842416	0.0528088	0.134712	-0.0743857	0.0582358	0.252598	0.0601706
GADD45B	brown	brown	-0.0221247	-0.00681491	-0.218561	0.0879867	-0.0146123	-0.0558585	0.0750319	-0.106135	-0.08388	-0.112598	0.0864139	-0.122185	0.103305	0.416719	0.12576
ANKRD37	brown	brown	0.0209418	0.00177403	-0.0122625	0.0193429	0.0398109	-0.0729676	0.101525	0.00646378	-0.0656746	0.0606667	0.017738	-0.111268	0.0210825	0.148886	0.0661353
RHOB	brown	brown	0.0811582	0.0578472	0.00349233	0.124573	0.0320569	0.00536714	0.143713	0.020481	-0.0565567	0.0650847	-0.00920477	-0.103341	0.106149	0.248001	0.171673
BCLAF1	brown	brown	0.0983026	0.0526714	0.0488828	0.134355	-0.00155955	0.0694489	0.038089	-0.00153144	-0.00786708	0.072005	-0.0292082	-0.0205707	0.0657556	0.117437	0.0870689
CHPT1	brown	brown	-0.0439619	-0.0861333	-0.209163	-0.024047	0.0647156	-0.116123	0.0673781	-0.0449376	-0.100418	-0.030786	0.2314	-0.0727198	0.0580817	0.18803	-0.0167421
MAGED2	brown	brown	-0.0312678	-0.0933911	-0.0454563	0.00754968	-0.0410815	-0.0837934	0.147189	-0.0410741	-0.154349	0.137109	-0.0111512	-0.157264	0.0573162	0.178625	-0.00784814
HSPA4L	brown	brown	0.0181933	-0.0491243	-0.0608708	0.0923498	-0.0466901	0.0515978	0.106323	0.0109697	-0.0759169	0.0160352	-0.0309266	-0.0457347	0.0772193	0.143333	-0.00182043
PCNA	brown	brown	0.103572	0.0559832	0.0228998	0.136485	0.00184247	0.0385226	0.0605845	-0.00663127	-0.0467096	0.063926	-0.00766081	-0.0776712	0.0798588	0.180255	0.124855
TSC22D1	brown	brown	-0.0531473	-0.125735	-0.117963	0.109416	-0.142058	-0.0691095	0.133365	-0.170753	-0.274304	0.156185	-0.00360484	-0.262109	0.178037	0.43945	0.0917049
SNRPN	brown	brown	0.0424514	0.0462845	0.021514	0.0379588	0.00448182	-0.0265324	0.0567776	-0.0197654	-0.0173546	0.0428223	-0.0307412	-0.0664226	0.00293619	0.0993525	0.0754589
PDCD7	brown	brown	0.0366605	0.0448377	-0.00462488	0.0528499	-0.0295893	-0.013232	0.013619	-0.0645372	-0.016476	-0.0188148	-0.0275301	-0.0595211	0.00442928	0.140636	0.0832661
ECE1	brown	brown	-0.0271779	-0.0432347	-0.129537	0.0111919	-0.000733421	-0.0442773	-0.0106914	-0.0552297	-0.0572086	-0.0429313	0.130672	-0.035736	0.0420994	0.143207	-0.00481736
ZNF292	brown	brown	0.083713	0.0475298	0.03398	0.112323	0.00588306	0.0108485	0.0302741	-0.0210527	-0.0212587	0.0697477	0.00413322	-0.0555882	0.05517	0.118362	0.100984
TMX4	brown	brown	-0.0091818	-0.00496011	-0.0179916	0.0386808	-0.0354878	-0.0452448	0.0205862	-0.0632472	-0.0654785	0.0306687	-0.0245117	-0.0957195	0.00907429	0.130112	0.0526444
IGFBP3	brown	brown	-0.196693	-0.319874	-0.414534	0.0240265	-0.163477	0.0160828	0.150419	-0.146578	-0.305116	-0.122659	0.162481	-0.127904	0.238228	0.384061	-0.21726
MT-COX2	brown	brown	-0.268658	-0.29292	-0.233374	0.0941995	-0.387716	-0.0889188	-0.156185	-0.39538	-0.398076	-0.0411	-0.0176415	-0.314298	0.12228	0.49116	-0.102068
HIRIP3	brown	brown	0.0528757	0.0463492	0.0160072	0.0408668	0.0177183	-0.0126998	0.0363775	-0.006339	-0.000354768	0.015278	-0.000506242	-0.0380515	0.00308565	0.0698146	0.0684139
ENSMFAG00000008326	brown	brown	-0.0376726	-0.102341	-0.189236	0.0793141	-0.0570187	-0.0411698	0.149805	-0.0909847	-0.185621	-0.0131654	0.0583731	-0.168828	0.123126	0.359001	0.0363431
PLD3	brown	brown	0.0500722	0.0502758	0.003446	0.0359958	0.0301539	-0.043767	0.0249041	-0.031314	-0.0115249	0.0477451	0.0514837	-0.0579492	0.0103399	0.12521	0.100621
ENSMFAG00000027241	cyan	cyan	-0.00663624	-0.000948284	-0.0764837	-0.0420077	0.124834	0.03076	-0.0140483	0.17024	0.0676569	-0.0653465	0.120599	0.121972	0.00834006	-0.0932977	-0.0782314
ENSMFAG00000001022	cyan	cyan	0.189363	0.136689	0.0405318	0.0542471	0.265045	0.0980647	0.12412	0.355567	0.170136	0.0143377	0.128646	0.182673	0.0509311	-0.112493	0.0699188
TMSB10	cyan	cyan	0.147908	0.00677391	-0.0420231	0.000471464	0.339588	0.154668	0.203806	0.50891	0.161361	0.100391	0.225156	0.284563	0.137604	-0.233013	-0.120692
ANXA2	cyan	cyan	0.296089	0.182567	0.0917419	0.126962	0.335421	0.326351	0.1079	0.558652	0.316513	-0.00492668	0.202061	0.426173	0.135115	-0.253993	0.0459185
SPHK1	cyan	cyan	0.072075	0.079142	0.044651	-0.0150315	0.143366	0.028203	-0.0322038	0.166505	0.131448	0.00969516	0.0421645	0.122663	-0.0303651	-0.12304	-0.00745285
ENSMFAG00000026637	cyan	cyan	0.0792315	0.0535583	0.0882627	0.0470179	0.0453149	0.0703636	0.0267989	0.131163	0.0629802	0.0401675	-0.01458	0.077476	0.0108936	-0.0736277	0.0195828
CXCL12	cyan	cyan	0.0595833	-0.00282454	0.0771162	0.0387254	0.0253275	0.0624242	0.0896081	0.121204	-0.00124796	0.101	-0.0543634	0.0153488	0.0137747	-0.0388108	-0.0153735
ENSMFAG00000028668	cyan	cyan	0.258711	0.188442	0.296731	0.158571	0.153017	0.195437	0.156941	0.313977	0.127001	0.226931	-0.128936	0.0776127	0.0783462	-0.136115	0.124395
RNF181	cyan	cyan	0.168104	0.147186	0.0468489	0.0338301	0.186598	0.0988075	0.0558375	0.247774	0.169124	-0.0242458	0.0703004	0.157111	3.09733e-05	-0.0914375	0.0750455
LAD1	cyan	cyan	0.181612	0.169725	-0.0177737	0.0190591	0.270042	0.156371	0.0331854	0.356758	0.24253	-0.134494	0.108164	0.255483	-0.0120856	-0.18416	0.00769027
GEM	cyan	cyan	0.125605	0.0770865	0.206111	0.02337	0.0465905	0.116819	0.0610138	0.207936	0.15441	0.109694	-0.0974033	0.198511	-0.0140015	-0.215644	0.00045937
TGM1	cyan	cyan	-0.0262117	-0.0209129	-0.0988588	-0.034024	0.102521	0.069329	-0.0136326	0.168859	0.0816779	-0.0987295	0.102562	0.174483	0.0263	-0.0900154	-0.111165
EIF4E2	cyan	cyan	0.103256	0.0610986	-0.00184178	0.0250791	0.140591	0.0683057	0.058934	0.216556	0.0906153	0.000772069	0.0953038	0.107111	0.0432593	-0.0621402	0.0211858
JPT1	cyan	cyan	0.199266	0.134443	0.0357802	0.0589021	0.252616	0.178961	0.0643362	0.379192	0.220367	-0.0572171	0.119858	0.263742	0.0380885	-0.172432	-0.0118945
ENSMFAG00000027209	cyan	cyan	0.0822802	0.0378874	0.0266675	0.013398	0.105784	0.0618614	0.11425	0.19351	0.0594945	0.0350171	0.022188	0.0764221	0.0284465	-0.0509184	-0.00564762
ATG12	cyan	cyan	0.117669	0.0848148	0.0381884	0.0281373	0.147464	0.0778029	0.0696494	0.215053	0.134148	-0.000724692	0.0409427	0.144105	0.00969691	-0.0898163	0.0191594
TPM4	cyan	cyan	0.0667889	-0.00995946	-0.035829	0.000843963	0.17375	0.143686	0.0433265	0.319876	0.118021	0.00413388	0.1589	0.254435	0.0890588	-0.158545	-0.10655
ENSMFAG00000036847	cyan	cyan	0.129933	0.0833001	0.110114	0.0474264	0.0928266	0.073648	0.0824237	0.161288	0.0740347	0.0717164	-0.0234083	0.065177	0.00950337	-0.0610621	0.0412521
SEC61G	cyan	cyan	0.20693	0.131299	0.133651	0.0446701	0.216534	0.14663	0.127134	0.355194	0.190375	0.0669919	0.0153468	0.200756	0.0174768	-0.171442	0.017825
ENSMFAG00000029127	cyan	cyan	0.0615456	0.00164424	0.0323938	0.0301083	0.0634628	0.0476499	0.117186	0.157816	0.00943889	0.0774498	-0.00846234	0.0245097	0.0482249	-0.0313979	-0.015897
PSMB5	cyan	cyan	0.242933	0.188608	0.131603	0.0951777	0.228184	0.115378	0.134828	0.300587	0.176466	0.0660877	0.0392662	0.135831	0.0259828	-0.0955616	0.117794
BTBD11	cyan	cyan	0.0329171	-0.00848127	-0.0538658	0.0210215	0.0692529	0.0784802	0.0411868	0.147788	0.010358	-0.0333476	0.0702853	0.0678579	0.0676793	-0.0194312	-0.0437908
CTTN	cyan	cyan	0.125549	0.0952337	0.059153	0.039828	0.15475	0.0536663	0.0259011	0.216616	0.12151	0.0638853	0.0736392	0.14252	0.00968505	-0.100618	0.0342943
EIF4EBP1	cyan	cyan	0.0901431	-0.000524399	0.026775	0.0495939	0.113917	0.116414	0.139341	0.267809	0.0302914	0.0564873	0.00963517	0.0828031	0.0648209	-0.0960419	-0.0585662
ENSMFAG00000003772	cyan	cyan	0.265882	0.135004	0.142159	0.174348	0.162768	0.219403	0.166416	0.318952	0.12099	0.128943	-0.0594137	0.118638	0.0978082	-0.0812901	0.0600968
ENSMFAG00000002167	cyan	cyan	0.14858	0.0380236	-0.0122832	0.0467193	0.220499	0.134317	0.15854	0.354751	0.0934181	0.0562192	0.134524	0.155873	0.101716	-0.0911296	-0.0359747
NDUFB2	cyan	cyan	0.226401	0.190025	0.0800263	0.0613255	0.279783	0.11008	0.114967	0.32848	0.201653	0.0196781	0.0994226	0.171683	0.0266925	-0.103242	0.109468
ENSMFAG00000014028	cyan	cyan	0.1252	0.0793459	0.0216785	0.0232858	0.189818	0.0619953	0.155778	0.267224	0.11102	0.0341322	0.077055	0.112939	0.0233957	-0.0832777	0.0130668
ENSMFAG00000029998	cyan	cyan	0.0754654	0.0144243	0.0164718	0.0589399	0.0678666	0.119599	0.0934592	0.185643	0.0447805	0.0161398	0.00243558	0.0897853	0.0640288	-0.0605382	-0.0313451
ENSMFAG00000000594	cyan	cyan	0.258359	0.155213	0.102412	0.111086	0.221136	0.174881	0.376286	0.386848	0.155162	0.058577	0.00218387	0.144946	0.0766081	-0.068473	0.111451
ENSMFAG00000044694	cyan	cyan	0.10915	0.0590604	0.11698	0.0392477	0.101041	0.0533181	0.0292647	0.167945	0.0804905	0.119051	0.0466322	0.106053	0.0364651	-0.0917507	0.0209454
ENSMFAG00000001552	cyan	cyan	0.157284	0.0580796	-0.11528	-0.0112579	0.42602	0.25988	0.0883358	0.574331	0.281582	-0.146178	0.380949	0.478951	0.124546	-0.329599	-0.165306
ABRACL	cyan	cyan	0.113374	0.120391	-0.0316998	-0.0498708	0.263674	0.0121851	0.0365406	0.288062	0.200233	-0.0427715	0.168931	0.211401	-0.0209838	-0.142352	0.0138376
SELENOH	cyan	cyan	0.183428	0.131815	0.0436036	0.0781528	0.185543	0.145017	0.10135	0.278691	0.141482	-0.0155819	0.0695136	0.147656	0.0382858	-0.0740857	0.0561769
CHST11	cyan	cyan	0.119508	0.0665008	0.272814	0.0621666	-0.0192418	0.0874597	0.0604929	0.105973	0.0508944	0.172774	-0.139538	0.0271681	-0.00597115	-0.0972908	0.0513215
ENSMFAG00000045775	cyan	cyan	0.0605673	0.00855622	0.0581213	0.0356539	0.0352859	0.0592232	0.0887509	0.114374	0.0113492	0.058312	-0.0152324	0.0323672	0.0396847	-0.0455097	-0.00629234
ENSMFAG00000020774	cyan	cyan	0.149275	0.0459134	-0.0311948	0.0471425	0.234416	0.160746	0.130783	0.374486	0.123259	0.0685796	0.147103	0.219619	0.111852	-0.102263	-0.0418466
UBE2L3	cyan	cyan	0.155298	0.115361	0.035825	0.0392526	0.207317	0.102665	0.0799632	0.286083	0.14835	-0.0100587	0.0848856	0.162139	0.0201753	-0.100383	0.0251018
ENSMFAG00000039994	cyan	cyan	0.163158	0.09327	0.105385	0.0910615	0.112548	0.119058	0.130559	0.211796	0.0744199	0.073278	-0.0162123	0.0638304	0.0497588	-0.0349186	0.0653818
PLAU	cyan	cyan	0.0760689	-0.0266386	0.27487	0.0846927	-0.0544585	0.156455	0.0464389	0.163002	0.0428889	0.251464	-0.100889	0.164688	0.0803302	-0.157784	-0.0195393
POLR2L	cyan	cyan	0.184948	0.151342	0.0694059	0.0435312	0.237107	0.112609	0.0853538	0.30772	0.164145	0.0290288	0.0984994	0.154946	0.0439997	-0.104633	0.0645293
KRT6A	cyan	cyan	0.142278	0.120333	-0.0160066	-0.132502	0.424175	0.131355	0.0486071	0.544782	0.390583	-0.134613	0.19001	0.494471	-0.102357	-0.454531	-0.176553
ENSMFAG00000040244	cyan	cyan	0.230384	0.148401	0.104726	0.0721736	0.21677	0.17527	0.196698	0.355835	0.197512	0.0390431	0.0285763	0.204883	0.039876	-0.129715	0.046797
ENSMFAG00000045082	cyan	cyan	0.0994786	0.106074	-0.0223358	-0.050739	0.259756	0.0361769	-0.00876908	0.276911	0.196174	-0.042849	0.182162	0.231638	-0.00703501	-0.149903	-0.00531697
ROMO1	cyan	cyan	0.19025	0.152959	0.0748028	0.0515028	0.239466	0.0999825	0.100129	0.304406	0.176868	0.0232995	0.087872	0.161974	0.0335178	-0.107786	0.0753535
ENSMFAG00000025723	cyan	cyan	0.125165	0.0281028	0.0690305	0.100529	0.073703	0.149492	0.17081	0.219099	0.0337668	0.0866813	-0.0204604	0.0826258	0.0760575	-0.037617	-0.0113937
ENSMFAG00000031981	cyan	cyan	0.129584	0.0654075	0.0702591	0.0304905	0.194516	0.115976	0.0790112	0.338112	0.139016	0.0979244	0.0387863	0.18612	0.0239794	-0.152399	-0.040242
ABL2	cyan	cyan	0.100281	0.0793789	0.194854	0.044804	0.0546786	0.0641739	0.0352224	0.168032	0.106961	0.116391	-0.10926	0.106119	-0.0369113	-0.132075	0.0190915
S100A16	cyan	cyan	0.108506	0.00138605	-0.198106	-0.000698561	0.375697	0.183111	0.217971	0.527385	0.143891	-0.100155	0.281065	0.283269	0.134887	-0.169481	-0.163057
PSMB6	cyan	cyan	0.262741	0.214845	0.13903	0.102526	0.251557	0.15949	0.10254	0.331383	0.223933	0.013819	0.0471067	0.189523	0.0247958	-0.124249	0.106556
PGAM1	cyan	cyan	0.245138	0.125693	0.0993588	0.116378	0.2592	0.24025	0.155356	0.459478	0.189366	0.0665069	0.0785142	0.248076	0.0964374	-0.168127	0.0131374
COPZ1	cyan	cyan	0.144856	0.119555	0.0360541	0.0068135	0.205504	0.0684133	0.0316086	0.244634	0.1566	-0.0165988	0.111825	0.161693	0.0051943	-0.11704	0.0408631
ENSMFAG00000041919	cyan	cyan	0.311669	0.234813	0.127094	0.117169	0.336052	0.263195	0.119002	0.4942	0.323312	0.0129157	0.0947773	0.347274	0.0821827	-0.209115	0.0756029
ENSMFAG00000042375	cyan	cyan	0.135531	0.10389	0.0450003	0.0485216	0.146947	0.0824079	0.0649277	0.20359	0.11076	0.0170371	0.0463183	0.0977014	0.0257753	-0.052102	0.049079
PMM2	cyan	cyan	0.118086	0.125236	0.0480487	0.0180205	0.15932	0.0439947	0.0190737	0.175572	0.138864	-0.0161243	0.0434716	0.114309	-0.0245578	-0.102861	0.0514329
CHCHD1	cyan	cyan	0.157589	0.141265	0.029447	0.0369179	0.189623	0.0707773	0.0542336	0.226996	0.151901	-0.0319651	0.0717729	0.116829	0.0045465	-0.0778015	0.0664859
APRT	cyan	cyan	0.17115	0.127741	0.0957259	0.0553412	0.172412	0.088884	0.125393	0.251991	0.103181	0.0602035	0.0068721	0.0634913	0.0150148	-0.0781306	0.049774
ENSMFAG00000028033	cyan	cyan	0.0471944	0.000456434	0.00292244	0.0234148	0.0576763	0.0500159	0.0878652	0.137226	0.0187173	0.0350532	0.027668	0.0454885	0.0427375	-0.0284204	-0.0077034
ENSMFAG00000045269	green	green	0.283857	0.267065	0.0231433	0.0825543	0.403237	0.0836579	0.146757	0.313578	0.250789	-0.0131187	0.215425	0.17729	0.0526276	-0.0476937	0.223815
RFXANK	green	green	0.069635	0.0702887	0.00994332	0.00408119	0.117516	-0.029307	0.0580235	0.0465363	0.0338173	0.0423593	0.0449539	-0.0188676	0.0057995	0.0131757	0.0819443
SCP2	green	green	0.19965	0.183818	0.0592122	0.0606026	0.243389	0.0288155	0.0773862	0.179049	0.16014	0.0262547	0.119875	0.104306	0.00633387	-0.0208981	0.147062
IDH2	green	green	0.180468	0.170124	0.06931	0.0634554	0.214631	0.00994507	0.0603092	0.158892	0.120185	0.0595996	0.0797772	0.0429426	0.0105367	-0.0259368	0.168618
ENSMFAG00000003346	green	green	0.250142	0.297748	0.0387104	0.0165197	0.403468	-0.0259996	0.0552907	0.231382	0.287757	-0.0595369	0.217684	0.177887	-0.0516133	-0.0616074	0.22741
TBL1XR1	green	green	0.0998832	0.107884	0.0470318	0.0337354	0.133739	-0.0182431	0.00199883	0.0569435	0.0884641	0.0278057	0.0721401	0.0515714	-0.000594824	-0.0158402	0.0997947
KCNK4	green	green	0.0665831	0.0984935	-0.0193548	-0.0329773	0.181571	-0.0192857	-0.000165842	0.0963108	0.115144	-0.0531898	0.0928077	0.0824668	-0.0326456	-0.0757578	0.0358655
CYB561	green	green	0.0837632	0.152733	-0.0202283	-0.0686235	0.279498	-0.0307187	-0.0375601	0.15446	0.196496	-0.0919801	0.132724	0.147698	-0.0854628	-0.142862	0.0399183
IGF2R	green	green	0.080889	0.0845359	0.0711094	0.0224981	0.0939353	-0.0422899	-0.0353827	0.0126669	0.0568277	0.0878787	0.0457827	0.00627779	-0.00461874	-0.00364554	0.0930125
ACAA1	green	green	0.113624	0.170709	0.0291077	-0.0431785	0.249203	-0.0435485	-0.0376651	0.123031	0.184302	-0.0248737	0.11852	0.118903	-0.057409	-0.112049	0.0815468
STMP1	green	green	0.184052	0.199832	0.201912	0.0199289	0.224125	0.0141717	0.0868663	0.190809	0.175655	0.120617	-0.0407621	0.07674	-0.0529775	-0.137846	0.137803
CAPZB	green	green	0.190328	0.198192	0.0664433	0.0319514	0.275543	0.0542436	0.0280791	0.227054	0.203586	-0.0068113	0.113154	0.15838	-0.0162505	-0.0962036	0.123891
TMEM254	green	green	0.0931335	0.133565	0.00922917	-0.0180979	0.200736	-0.0310306	-0.0218959	0.103994	0.13005	-0.0384727	0.0892172	0.0634916	-0.0467805	-0.0641822	0.0887556
PRSS27	green	green	0.0219357	0.118752	-0.126568	-0.171403	0.362412	-0.0962303	-0.174201	0.129592	0.249466	-0.149921	0.321937	0.232823	-0.0986174	-0.173408	-0.0147317
RHBDL2	green	green	0.0984682	0.150272	-0.119868	-0.0412911	0.289982	-0.0413768	-0.078159	0.106297	0.191988	-0.145998	0.303842	0.165674	-0.017384	-0.0167025	0.102772
RAB25	green	green	0.190267	0.343124	-0.0944563	-0.148964	0.570861	-0.0446808	-0.0922597	0.336191	0.468776	-0.311948	0.335133	0.371566	-0.180105	-0.286934	0.0922161
SERPINB6	green	green	0.0827587	0.119042	-0.0338056	-0.0927026	0.334545	-0.0624487	0.00190267	0.200317	0.182322	-0.0205063	0.191095	0.142807	-0.0779681	-0.152789	0.0020803
ENSMFAG00000044724	green	green	0.06719	0.0780872	-0.00837966	0.00965173	0.134123	-0.0271535	0.0288981	0.0628002	0.055611	-0.00846077	0.0669505	0.0211945	-0.00765465	-0.00240648	0.0573083
OST4	green	green	0.199524	0.156908	0.0576851	0.0321377	0.281327	0.044032	0.154779	0.236427	0.15033	0.068069	0.120909	0.112441	0.0307411	-0.0585004	0.105901
ENSMFAG00000041011	green	green	0.0583144	0.0765085	-0.0206493	-0.0859091	0.322519	-0.0925296	0.0354194	0.196674	0.125531	0.0356872	0.165649	0.0956296	-0.0554172	-0.134049	-0.00399309
IFI6	green	green	0.0867804	0.136653	-0.0630641	-0.104504	0.390484	-0.0985671	-0.0691036	0.171394	0.193632	-0.0386787	0.328312	0.168367	-0.032512	-0.114499	0.0274306
CLCA2	green	green	0.121901	0.105822	0.0573352	0.0246889	0.242422	0.0103565	0.113852	0.228089	0.103584	0.0691627	0.0326089	0.0574691	-0.0274883	-0.103547	0.0670076
EPHX3	green	green	0.0765377	0.141945	-0.163572	-0.0793881	0.363784	-0.0471433	-0.107646	0.181858	0.243084	-0.193557	0.383442	0.245311	-0.045189	-0.100919	0.0360628
CALM3	green	green	0.0982977	0.086967	0.0364278	0.00344433	0.179488	-0.0152078	0.0571026	0.118866	0.076704	0.0399246	0.0592906	0.0357854	-0.00185178	-0.0425257	0.0563342
POF1B	green	green	0.0765962	0.154172	-0.0981205	-0.0578651	0.282894	-0.0557437	-0.115053	0.124005	0.215841	-0.153041	0.243323	0.182856	-0.0581309	-0.082501	0.0519063
RER1	green	green	0.165646	0.155697	-0.0115388	0.0209439	0.296458	0.0272539	0.0437694	0.188579	0.163039	-0.0267494	0.171085	0.130559	0.00448942	-0.0422428	0.0924883
EPHA1	green	green	0.109234	0.17553	-0.0333347	0.00203977	0.245051	-0.0064725	-0.056258	0.120149	0.185456	-0.118016	0.143318	0.11197	-0.0608397	-0.0666086	0.0909942
NCCRP1	green	green	-0.0126025	0.0824989	-0.123021	-0.198627	0.381555	-0.151576	-0.0246348	0.179883	0.177719	-0.109109	0.283754	0.161029	-0.112458	-0.193505	-0.0506478
CYB5R1	green	green	0.0755295	0.105352	0.024944	-0.0123707	0.170944	-0.0185637	0.0093901	0.0985185	0.113628	-0.0187637	0.0564211	0.0711569	-0.055221	-0.0709939	0.0398568
LSS	green	green	0.0664741	0.0985897	0.0308225	-0.00797352	0.156139	0.0031193	0.00812604	0.1201	0.107405	-0.00992468	0.014748	0.0623585	-0.048328	-0.0930236	0.0200366
SPTBN2	green	green	0.142852	0.238531	0.0023096	-0.0396628	0.333111	-0.0229018	-0.107628	0.184746	0.292243	-0.132861	0.178022	0.217194	-0.10496	-0.169866	0.102156
TENT5B	green	green	0.0525978	0.0970465	-0.107894	-0.0435656	0.235049	-0.0583488	-0.0419477	0.102122	0.125789	-0.0915126	0.244381	0.106406	-0.0105609	-0.00665735	0.064614
TRIM22	green	green	0.0880967	0.108316	0.0830756	-0.00359535	0.132176	-0.0317671	-0.0118508	0.0518331	0.102178	0.0534071	0.0496139	0.0580663	-0.0243357	-0.0526244	0.0740914
CALML3	green	green	0.211793	0.251434	-0.0871769	0.017365	0.418054	0.031272	0.0225643	0.29002	0.283536	-0.216251	0.32569	0.23981	-0.0276434	-0.0685363	0.181344
PPP1CA	green	green	0.190087	0.16703	0.093895	0.0800546	0.213206	0.0808055	0.0804924	0.184327	0.14501	0.0315285	0.040945	0.091357	0.0152393	-0.0687798	0.106151
ENSMFAG00000038402	green	green	0.108149	0.15407	0.0609511	-0.00193512	0.191575	-0.000147883	0.0114647	0.104466	0.146843	-0.0320165	0.0405629	0.079243	-0.0421743	-0.0828795	0.0981182
KCNK6	green	green	0.0389607	0.0685018	-0.0470356	-0.0292884	0.139659	-0.0255963	-0.0514316	0.0637155	0.108414	-0.054978	0.145245	0.110083	-0.00730307	-0.0468109	0.0384759
ARHGAP18	green	green	0.103342	0.111691	0.060633	0.0358179	0.144539	0.0232284	0.0223067	0.0989567	0.0858773	0.0358812	0.012626	0.0338697	-0.00745922	-0.0422634	0.0722035
BAX	green	green	0.126817	0.101187	0.0360122	0.0513087	0.143651	0.010394	0.0538978	0.0913858	0.0643123	0.0469505	0.0755199	0.0352694	0.0318997	-0.00457386	0.0766372
RDH5	green	green	0.141793	0.151921	0.0109895	0.0199137	0.281295	0.00661448	0.0530865	0.177139	0.155774	-0.00781174	0.155637	0.110181	-0.00408679	-0.0689731	0.0890796
TMC7	green	green	0.122362	0.134103	0.0158561	0.0514893	0.159059	0.00562759	0.0186319	0.102086	0.106223	-0.00305712	0.0977902	0.0767401	0.0307149	-0.00434876	0.156677
DBI	green	green	0.195854	0.195028	0.0874719	0.0109705	0.320471	0.0195567	0.118947	0.25931	0.188904	0.0275256	0.0700778	0.112709	-0.0398957	-0.118451	0.0815467
SAC3D1	green	green	0.08644	0.0932017	0.0452936	0.0367106	0.108958	-0.0184289	0.0434785	0.0604703	0.0419186	0.0373229	0.0168854	-0.0195128	-0.00580541	0.000855224	0.0979232
SPACA9	green	green	0.0589353	0.0724651	-0.0332668	-0.0251809	0.146163	-0.0313526	0.000925936	0.0756922	0.0762841	-0.0334567	0.132556	0.0517612	-0.00699398	-0.0277243	0.0498104
CTSH	green	green	0.0257965	-0.010238	-0.133295	-0.0652668	0.240261	-0.0698443	0.0498145	0.155233	0.035726	0.0506812	0.279398	0.091334	0.0259419	-0.0543291	-0.0317843
HEBP2	green	green	0.168721	0.196851	-0.021547	-0.0246766	0.3637	0.0452134	0.0411879	0.273964	0.256671	-0.102526	0.166816	0.219802	-0.0451698	-0.154773	0.0549375
ENSMFAG00000039961	green	green	0.0793512	0.101467	0.0398401	-0.00400905	0.152166	-0.00452691	-0.00791818	0.0819775	0.107741	-0.0159552	0.055944	0.063809	-0.027321	-0.0670822	0.0518986
ENSMFAG00000001891	green	green	0.108169	0.0226658	-0.000811222	0.0875313	0.11103	0.0439719	0.108873	0.116642	-0.0145231	0.0833079	0.0624781	0.000140031	0.0918926	0.0414553	0.0522228
PYCARD	green	green	0.268216	0.327818	0.164846	0.0614643	0.357457	0.00690719	0.0470184	0.225335	0.267666	0.0174358	0.0935031	0.115046	-0.0584736	-0.105388	0.267165
NENF	green	green	0.0719114	0.0617719	0.0143451	0.0213481	0.11055	-0.00286032	0.0617605	0.0686911	0.0327638	0.0409878	0.0390864	0.00278797	0.00965399	0.000964719	0.051716
NDUFB4	green	green	0.211753	0.180467	0.0737155	0.0760136	0.261631	0.0882503	0.112437	0.223472	0.17239	0.0245719	0.0589128	0.134806	0.0289719	-0.0715358	0.106581
TMED3	green	green	0.210987	0.248958	0.108111	0.0223488	0.308861	-0.0384772	-0.0134454	0.14337	0.210375	0.0318465	0.1616	0.092689	-0.0403729	-0.0676577	0.207909
IFIT3	green	green	0.0288555	0.0634532	-0.0330815	-0.0760893	0.185432	-0.0632077	-0.0849191	0.0412126	0.104823	0.0016952	0.161659	0.089916	-0.0194024	-0.0708164	0.0055134
SPINK5	green	green	0.00126708	0.150612	-0.14829	-0.242248	0.49498	-0.178843	-0.0524988	0.262264	0.27749	-0.177317	0.2929	0.229684	-0.180137	-0.284768	-0.0540807
FEZ2	green	green	0.0962018	0.125116	0.00652239	-0.00741281	0.204098	-0.0375673	-0.00420222	0.106222	0.122817	0.000591356	0.128038	0.0755957	-0.0284462	-0.0582845	0.0787109
TMEM117	green	green	0.0657853	0.063912	0.062831	0.0331522	0.0755846	0.0163966	0.00631685	0.0622462	0.0609423	0.0518507	0.0110797	0.0464977	-0.00794699	-0.0436267	0.0403822
KRT5	green	green	0.256788	0.315361	0.347933	0.116101	0.157506	0.0327401	0.218787	0.218071	0.18183	0.111062	-0.365679	-0.0534881	-0.155621	-0.091689	0.251057
SORT1	green	green	0.0667024	0.105377	-0.044945	-0.0356204	0.214593	-0.0420893	-0.0575274	0.088361	0.144141	-0.0683787	0.173984	0.114755	-0.0332153	-0.0723712	0.0612138
ENSMFAG00000000811	green	green	0.0870017	0.140051	0.0348849	-0.0105969	0.202577	-0.0203308	-0.0067035	0.127382	0.148961	-0.04224	0.0764314	0.10331	-0.0526841	-0.0962799	0.0829469
DPCD	green	green	0.0902432	0.0894995	0.049054	0.00887166	0.1552	-0.00751425	0.0503987	0.104475	0.0729399	0.0529959	0.0368292	0.0275124	-0.0157861	-0.0567576	0.0571455
AP2S1	green	green	0.199067	0.18753	0.075987	0.0257714	0.274679	0.055443	0.0772328	0.223029	0.185683	0.0112835	0.0802167	0.133163	-0.0149708	-0.102844	0.101391
FAM162A	green	green	0.226556	0.225793	0.148653	0.0625562	0.247982	0.0330476	0.101011	0.189841	0.18073	0.0450543	0.0131138	0.082418	-0.0571335	-0.0679504	0.165828
ENSMFAG00000003395	green	green	0.103755	0.112813	0.0551993	0.0122723	0.159037	0.0355879	0.0305834	0.116932	0.104805	0.0193448	0.0345483	0.0669914	-0.00425419	-0.0640177	0.069262
MCTS1	green	green	0.153027	0.15035	0.0956839	0.0270656	0.198933	0.0403691	0.0466565	0.165835	0.145687	0.0377762	0.0391048	0.0940175	-0.0203994	-0.0970004	0.0816519
ENSMFAG00000032695	green	green	0.073396	0.062142	0.0280549	0.0172275	0.106862	0.0213161	0.0114633	0.0968551	0.0718231	0.0215948	0.0421925	0.0677771	-0.00490959	-0.0374836	0.0272013
LSM3	green	green	0.19694	0.170267	0.0988124	0.119799	0.171481	0.0816308	0.103775	0.147788	0.0937709	0.055908	-0.00638341	0.0175267	0.0343341	0.00552531	0.150147
CCDC92	green	green	0.0765021	0.0800363	0.0209203	0.0125406	0.1138	0.0084838	0.00323622	0.0788398	0.0860374	0.0165394	0.0529451	0.0632626	-0.0028338	-0.0285063	0.0642737
ETFB	green	green	0.227148	0.248725	0.182847	0.0480972	0.267182	0.00707156	0.121675	0.180046	0.185856	0.0830544	-0.00261531	0.0597285	-0.0578606	-0.0708103	0.200528
SPAG16	green	green	0.0547207	0.0885323	-0.114495	-0.0721743	0.290716	-0.0767372	-0.00467332	0.128501	0.127046	-0.0851819	0.247582	0.100184	-0.0444393	-0.0481013	0.0349523
DEGS2	green	green	0.115849	0.205111	-0.119667	-0.0388202	0.318427	-0.089587	-0.126632	0.100209	0.221633	-0.18717	0.365105	0.141976	-0.0375634	-0.032489	0.186906
NUDT16	green	green	0.139221	0.187068	0.0800611	-0.00768261	0.214246	0.0122654	0.00584904	0.129774	0.185301	-0.0244221	0.0281421	0.105952	-0.0633933	-0.108599	0.0947161
TCTEX1D2	green	green	0.112391	0.094871	0.0841559	0.0400516	0.139286	0.0288208	0.074808	0.115411	0.0666136	0.09764	0.00564869	0.0284303	-0.00112341	-0.0328687	0.0566952
IDH1	green	green	0.0681957	0.0801319	0.0379536	-0.0492474	0.180812	-0.0698653	-0.0147881	0.086021	0.0845134	0.0558729	0.145712	0.0522529	-0.0378586	-0.105558	0.0417949
DPP3	green	green	0.0935409	0.0913831	0.0181328	0.0138817	0.145541	0.0219153	-0.00379602	0.113548	0.102582	-0.0167034	0.0785269	0.0902024	0.00516674	-0.0508649	0.0420288
NTAN1	green	green	0.0946383	0.144099	0.0185795	-0.0334876	0.200099	-0.0196813	-0.0101702	0.106859	0.149974	-0.0425044	0.08066	0.0991925	-0.059768	-0.0832409	0.0885031
TRAPPC1	green	green	0.141925	0.146772	0.017349	0.0211138	0.229346	0.00613408	0.0548497	0.157945	0.126097	-0.0149051	0.0868398	0.0599592	-0.0168124	-0.0355179	0.113385
NDUFC1	green	green	0.203146	0.227427	0.143759	0.0371897	0.251141	0.0401135	0.0652873	0.20057	0.196689	0.0257009	-0.0112348	0.0924582	-0.0562839	-0.125523	0.128347
DBNL	green	green	0.153904	0.208226	0.0767738	0.0123446	0.239509	0.0195485	0.00645431	0.153762	0.186464	-0.0227062	0.0174724	0.0937151	-0.0645919	-0.0994867	0.108953
NDUFC2	green	green	0.245186	0.23174	-0.0181164	0.0493376	0.389299	0.0644872	0.0162329	0.274755	0.25606	-0.075592	0.289262	0.221108	0.025838	-0.0578129	0.152922
PTPRZ1	green	green	0.0114288	-0.0105977	-0.119908	-0.0593908	0.20032	-0.0706578	0.0576349	0.110732	0.0304814	-0.0227827	0.223974	0.0658124	0.0189049	-0.00966812	-0.0334982
ENSMFAG00000033384	green	green	0.0125345	-0.0052058	-0.121682	-0.0533209	0.208451	-0.0717101	0.0252785	0.101767	0.0466556	0.00786248	0.254698	0.0807088	0.0308153	-0.026829	-0.0190689
PLA2G12A	green	green	0.15673	0.185828	-0.0896989	-0.011226	0.328621	-0.0175901	-0.0706301	0.156569	0.232583	-0.156154	0.336929	0.210085	-0.0179727	-0.051996	0.129045
FBXO6	green	green	0.102242	0.116696	0.0216782	0.00123877	0.164706	-0.00887513	0.0286635	0.0997441	0.110322	-0.0244509	0.0519315	0.0727249	-0.0363404	-0.0536701	0.0731137
BLOC1S2	green	green	0.180624	0.178909	0.0726199	0.0254205	0.227239	0.00874468	0.0466286	0.163954	0.178442	0.00944328	0.0528648	0.114734	-0.0453535	-0.0595506	0.128549
SMIM22	green	green	0.0622366	0.102741	-0.0190036	-0.0738095	0.23427	-0.0711883	-0.0244271	0.108084	0.136746	-0.0253243	0.182441	0.104425	-0.0325105	-0.0953694	0.0339069
VPS25	green	green	0.118946	0.116209	0.0298496	0.0209787	0.185158	0.00998282	0.0363702	0.110879	0.0985437	0.0115102	0.061155	0.0448851	-0.0189467	-0.0350225	0.0800672
TINCR	green	green	0.085943	0.1193	0.0073057	-0.00654169	0.217087	-0.0172736	0.0602999	0.130289	0.120655	-0.0466045	0.0529727	0.0647614	-0.0447791	-0.0546747	0.055661
CAMK2D	green	green	0.0562458	0.0248502	-0.0358501	0.0143176	0.130412	0.0178818	0.034379	0.101813	0.0425395	0.00389956	0.0880922	0.0541465	0.0224525	-0.0231868	-0.00473836
ZDHHC24	green	green	0.0744871	0.0595324	0.0334492	0.0278353	0.120783	-0.0087422	0.0591097	0.0807016	0.0331195	0.0582307	0.0473008	0.00133181	0.0263074	-0.00685775	0.0445218
MVD	green	green	0.0921187	0.126269	0.0718749	-0.00479029	0.154275	0.0200017	0.00493305	0.10993	0.121644	-0.00370209	-0.0236467	0.0567663	-0.0720489	-0.117275	0.0309682
PXDN	green	green	0.0354228	0.0317443	-0.0147091	-0.024223	0.113429	-0.0442615	-0.0164348	0.0672833	0.067034	0.0594208	0.126287	0.0737169	0.00812737	-0.0452161	0.0207185
MPP7	green	green	0.111003	0.161117	-0.0996957	0.019948	0.249952	-0.0387019	-0.0761514	0.107822	0.172849	-0.145547	0.243803	0.115166	-0.0128489	0.00520091	0.130064
ENSMFAG00000044383	green	green	0.0656398	0.154892	-0.0302753	-0.100361	0.296436	-0.0541344	-0.0700704	0.140896	0.207236	-0.101281	0.160068	0.151028	-0.0859095	-0.167915	0.0335034
COMTD1	green	green	0.0915073	0.0903805	0.0589219	0.000137434	0.135782	-0.0229067	0.04411	0.0920456	0.0702406	0.0482314	0.0211899	0.0142483	-0.027547	-0.0557529	0.0774934
CSTA	green	green	0.110395	0.141399	-0.166815	-0.103918	0.555966	-0.0998833	0.101496	0.394236	0.2235	-0.0991182	0.442073	0.210636	-0.0375037	-0.155611	0.0460682
MTLN	green	green	0.0682172	0.0932594	0.025538	0.00501059	0.126742	0.0110697	0.00645432	0.086186	0.0998127	-0.0336314	0.0354459	0.0651146	-0.0216676	-0.0449593	0.0556089
SMIM5	green	green	0.123032	0.280932	-0.108328	-0.147583	0.46915	-0.0919753	-0.234613	0.182257	0.396342	-0.232039	0.375036	0.312551	-0.13427	-0.203162	0.0930605
COMMD1	green	green	0.0996908	0.0807646	0.0190167	0.0241765	0.162343	0.0264733	0.0728091	0.125797	0.0749989	0.0110886	0.0543515	0.0505556	0.0200161	-0.0219786	0.0504945
TYMP	green	green	0.0214762	0.063732	-0.112895	-0.130514	0.343634	-0.0587211	0.0139298	0.23972	0.180263	-0.0956861	0.221638	0.198427	-0.0748765	-0.193623	-0.0699033
PDLIM2	green	green	0.0169243	0.0569835	-0.0259799	-0.0709212	0.212255	-0.0414629	-0.00408786	0.117868	0.106933	-0.0047123	0.0940326	0.0952921	-0.0394605	-0.118526	-0.0315114
H2BC5	green	green	0.0269736	0.0293719	-0.109288	-0.0556523	0.199423	-0.0701335	-0.0191127	0.0830259	0.0737384	-0.0382295	0.251696	0.093574	0.00745307	-0.0183214	0.0206694
HES4	green	green	0.0974791	0.183723	-0.0383923	-0.0310399	0.222482	-0.0092349	-0.115899	0.0999225	0.215409	-0.144383	0.179193	0.154067	-0.0499424	-0.0874999	0.140605
ENSMFAG00000001311	green	green	0.0808107	0.190291	-0.166584	-0.152327	0.446679	-0.125469	-0.192411	0.152798	0.303333	-0.202866	0.489265	0.281497	-0.0840094	-0.155838	0.0601575
ARRDC1	green	green	0.0908127	0.146185	0.0320063	-0.0311015	0.192308	-0.0115338	-0.100931	0.0935484	0.173666	-0.0312456	0.119477	0.132086	-0.041604	-0.098696	0.0719096
NDUFA12	green	green	0.174601	0.176142	0.0665686	0.0481316	0.206877	0.0554065	0.061583	0.173826	0.157902	-0.0216457	0.0317216	0.0898886	-0.0202746	-0.0472242	0.128603
MSRB2	green	green	0.115898	0.155114	0.0688352	-0.00288565	0.212503	-0.0336843	0.0123319	0.103533	0.125779	0.0390298	0.0876073	0.0535558	-0.0332068	-0.0692241	0.127859
ENSMFAG00000033629	green	green	0.078341	0.103788	0.032518	-0.0342851	0.228161	0.00109856	0.093501	0.222723	0.13901	0.0372813	-0.0239081	0.0964607	-0.0592766	-0.156813	-0.00267775
ATF7IP2	green	green	0.0503345	0.0858452	-0.0523618	-0.056642	0.192341	-0.0284682	-0.0553354	0.0904088	0.130147	-0.073816	0.147546	0.121532	-0.0285703	-0.0813279	0.0219821
AP1S1	green	green	0.15344	0.165029	-0.00308074	-0.0011483	0.305018	-0.0396854	0.0459131	0.170339	0.141718	0.0146394	0.198116	0.0735643	0.00461661	-0.0338542	0.141014
ENSMFAG00000004020	green	green	0.164472	0.136531	0.0938268	0.0597527	0.173394	0.0225453	0.116752	0.144427	0.0914967	0.0722137	0.0126752	0.0211179	0.02071	-0.0174775	0.121689
ECM1	green	green	0.0535951	0.076828	0.00366551	-0.089699	0.313582	-0.00678676	-0.0369732	0.228044	0.187545	0.019403	0.158476	0.226724	-0.009371	-0.203034	-0.0647759
COPE	green	green	0.268845	0.268895	0.154643	0.0544244	0.32999	0.0616037	0.0282992	0.247569	0.269289	0.0393549	0.102856	0.182234	-0.039056	-0.138467	0.184993
SSR3	green	green	0.131765	0.10665	0.0822823	0.0386692	0.163798	0.02805	0.0706842	0.124022	0.0845597	0.0682812	0.0273924	0.0488263	-0.000197136	-0.0535273	0.0733634
ENSMFAG00000037251	green	green	0.0773832	0.0965351	0.041024	0.00589439	0.136078	-0.00256188	0.0109841	0.0878243	0.0874117	0.0230831	0.054787	0.0560785	-0.00927317	-0.0493257	0.0752055
CNP	green	green	0.0607001	0.0736242	-0.0185861	-0.00356348	0.155733	-0.0118332	0.0291196	0.0796354	0.0682488	-0.0162895	0.0752692	0.0386341	-0.0132547	-0.0245599	0.0468019
PAM	green	green	0.043914	0.042277	-0.0633588	-0.0425933	0.188215	-0.0465031	-0.000558734	0.104757	0.0744487	-0.00106202	0.172941	0.079792	-0.00332037	-0.0433493	0.00773877
DYNLL1	green	green	0.237258	0.257417	0.0688747	0.00925175	0.451886	0.0275222	0.150441	0.375075	0.276121	0.0177396	0.101003	0.169795	-0.0491389	-0.184901	0.10735
PHPT1	green	green	0.243474	0.226127	0.187584	0.0705881	0.243149	0.0959799	0.1143	0.224092	0.195242	0.083841	-0.00571907	0.113299	-0.00642645	-0.114147	0.154596
ENSMFAG00000040216	green	green	0.0375098	0.0981375	-0.16136	-0.0885894	0.361268	-0.0770652	0.00548946	0.229637	0.164747	-0.165071	0.291682	0.155862	-0.0707364	-0.104848	0.0205059
NDUFV3	green	green	0.116037	0.122163	0.00466196	-0.000917876	0.190205	0.0286048	0.0247121	0.134286	0.135816	-0.0399205	0.0923659	0.0993969	-0.0123736	-0.0603729	0.052153
MAP1LC3A	green	green	0.0732122	0.13029	-0.108736	-0.0943217	0.340624	-0.0443874	-0.0997681	0.164705	0.22619	-0.120663	0.345858	0.240647	-0.0200458	-0.1181	0.0295501
TMPRSS11E	green	green	0.0668408	0.17647	-0.0763012	-0.145621	0.354347	-0.0855198	-0.173645	0.125805	0.287724	-0.157726	0.275668	0.250608	-0.110593	-0.191504	0.0104083
ATP5F1D	green	green	0.256944	0.247029	0.0924429	0.0684696	0.315343	0.0811965	0.137013	0.261883	0.216435	-0.00478308	0.0888673	0.142113	0.00226256	-0.0755199	0.166934
STN1	green	green	0.0769003	0.0871406	-0.0185328	-0.00192421	0.156233	0.00699613	-0.015255	0.0897501	0.0971698	-0.00956711	0.112413	0.080725	-0.00552739	-0.0255108	0.0663214
C5orf63	green	green	0.0842323	0.111227	0.0478498	0.00983626	0.116293	0.000329156	0.0310811	0.0686362	0.0884526	-0.00373455	0.0216186	0.0280668	-0.0194675	-0.0435802	0.0860096
OVOL1	green	green	0.0831851	0.168017	-0.0632292	0.013694	0.188677	-0.0143309	-0.115661	0.0804103	0.19599	-0.15559	0.198925	0.162617	-0.0127954	0.0023529	0.162876
PPIC	green	green	0.0736544	0.0621696	-0.0307976	-0.0339883	0.248426	-0.0528694	0.0599231	0.145047	0.0725141	0.0482526	0.188443	0.0675297	0.00685458	-0.0582955	0.029939
ENSMFAG00000035657	green	green	0.165931	0.187847	0.102469	0.016778	0.248776	0.043485	0.0655334	0.202378	0.17767	0.00104783	-0.0253642	0.0891519	-0.0766727	-0.127815	0.07271
NDUFA11	green	green	0.223363	0.193347	0.145662	0.070281	0.287101	0.0450965	0.1615	0.237243	0.150173	0.112572	0.0648863	0.0815918	0.0220658	-0.0602477	0.144457
FUCA2	green	green	0.085436	0.0933578	0.0160336	-0.00590735	0.158422	-0.010951	-0.0113684	0.0930669	0.096142	-0.00516498	0.0944956	0.0638957	-0.0161628	-0.045069	0.0595306
GSTZ1	green	green	0.11438	0.122693	0.0564593	0.0159424	0.182587	-0.00343245	0.0437837	0.123202	0.115465	0.01571	0.0536338	0.0629702	-0.027197	-0.0628636	0.0854567
NINJ2	green	green	0.119055	0.172575	0.116571	0.01426	0.152482	0.0301688	0.00363636	0.12075	0.153262	0.00938734	-0.0265837	0.0685134	-0.0568876	-0.133838	0.100077
PLCB3	green	green	0.113147	0.116284	0.0958045	0.0481868	0.115155	0.0284931	0.0050773	0.0848739	0.0858534	0.0580413	-0.00247793	0.0400748	-0.00263725	-0.0500503	0.0745807
CAPN5	green	green	0.126948	0.22011	-0.0540854	-0.036868	0.294256	-0.0488312	-0.138712	0.0914531	0.25194	-0.160368	0.249261	0.175497	-0.0633323	-0.0907927	0.139741
PRMT2	green	green	0.121646	0.0961823	0.0558102	0.0301399	0.165055	0.0218361	0.0709998	0.141069	0.0910962	0.0624989	0.0238534	0.0634396	-0.00908633	-0.0472557	0.0566202
MPV17	green	green	0.0870043	0.0799076	0.0307455	0.0256766	0.120859	0.0140512	0.0384905	0.0858175	0.0594519	0.0301028	0.0440709	0.0311627	0.0153682	-0.0172154	0.0688298
GTF2H5	green	green	0.197856	0.20333	0.0863504	0.035664	0.275088	0.0197759	0.0560014	0.187373	0.183765	0.0245375	0.102081	0.102796	-0.0212473	-0.0672163	0.143141
LAMTOR2	green	green	0.141748	0.169406	0.0824771	0.0195403	0.17807	0.00302264	0.0289983	0.106216	0.139241	-0.0052187	0.0504099	0.0647874	-0.0329919	-0.0583986	0.134079
COMMD8	green	green	0.0871803	0.0994085	0.0416405	0.0238514	0.125704	0.00195147	0.0353244	0.0840293	0.0725226	0.00887153	0.026409	0.0278471	-0.019825	-0.0354649	0.0614918
RBM3	green	green	0.293031	0.237476	0.160761	0.138072	0.276786	0.162868	0.169919	0.286467	0.193726	0.0856674	0.0266392	0.138559	0.0514463	-0.0854386	0.178634
ENSMFAG00000003734	green	green	0.295916	0.338538	0.213268	0.0954868	0.304287	0.0254081	0.0517967	0.211616	0.267557	0.0495394	0.0684465	0.129783	-0.0485508	-0.042205	0.29064
NIT2	green	green	0.177036	0.154012	0.0889734	0.0651998	0.198303	0.0546137	0.0714646	0.172494	0.122543	0.048537	0.0426561	0.0565247	0.00355426	-0.0401633	0.106802
SNRPD3	green	green	0.211072	0.173085	0.0963844	0.0833369	0.235769	0.0975902	0.0840175	0.199917	0.157622	0.029081	0.0723267	0.125175	0.0134526	-0.0708966	0.115693
ENSMFAG00000039862	green	green	0.263391	0.260773	0.135829	0.0523604	0.332555	0.0960331	0.0930427	0.278768	0.256073	0.00217626	0.0793322	0.182916	-0.01834	-0.128374	0.156156
ENSMFAG00000033843	green	green	0.281457	0.263393	0.00472985	0.0267393	0.496836	0.123415	0.0663005	0.438261	0.369129	-0.0639615	0.314236	0.378349	0.0490242	-0.169248	0.134373
C3orf14	green	green	0.0986024	0.0994142	0.0514726	0.00809404	0.133467	-0.0088397	0.0428496	0.0874539	0.0692389	0.0485199	0.0537205	0.0212672	0.00543703	-0.0099495	0.0864869
BNIPL	green	green	0.102985	0.197765	-0.0651349	-0.0772475	0.345867	-0.0267111	-0.101942	0.184611	0.28309	-0.169032	0.212285	0.226974	-0.104657	-0.162937	0.0483901
TYMS	green	green	0.152386	0.0625437	0.0680578	0.0854757	0.122194	0.0504966	0.0939395	0.114916	0.0145173	0.122894	0.0225592	0.0015884	0.0563203	-0.0153081	0.0465797
GNA15	green	green	0.0366983	0.0391877	-0.0532179	-0.0565812	0.19286	-0.0084246	-0.019648	0.126775	0.117333	-0.0694524	0.157232	0.147441	-0.026956	-0.108005	-0.0218671
ENSMFAG00000004038	green	green	0.202085	0.167819	0.103924	0.0802897	0.217903	0.0785035	0.131863	0.201763	0.119423	0.0673659	0.0218953	0.059695	0.0239619	-0.0318974	0.122524
ENSMFAG00000037340	green	green	0.0776001	0.082912	-0.000168053	0.000989766	0.156909	-0.0240109	0.0455781	0.0945986	0.0577503	0.0181111	0.0665794	0.00257217	-0.0176078	-0.014355	0.0806396
RMDN1	green	green	0.0980683	0.0885474	0.0724326	0.0337285	0.0922545	0.027283	0.048769	0.065713	0.0432073	0.0561415	-0.0120997	-0.00376332	0.00685683	-0.0100033	0.0822092
WDR18	green	green	0.0674108	0.0669809	0.0443833	0.010815	0.114888	0.00156833	0.0666436	0.0873212	0.0346998	0.0454842	0.0174673	-0.0158701	-0.0184388	-0.0397428	0.038339
CD2AP	green	green	0.0867093	0.0799559	0.0114131	0.0321501	0.128541	0.00198732	-0.0135312	0.0589188	0.0734855	0.0211088	0.100175	0.0581368	0.0139126	-0.00875119	0.0642995
SNF8	green	green	0.186599	0.167152	0.0907205	0.0672321	0.182872	0.056275	0.0936515	0.150737	0.117081	0.0538507	0.0252768	0.0555559	0.0202305	-0.0132776	0.130273
NMI	green	green	0.0866027	0.104517	-0.00348665	-0.0110429	0.162665	0.000143822	0.0149409	0.108273	0.121091	-0.0465643	0.0655779	0.0904139	-0.0433728	-0.0527338	0.0392231
EPN1	green	green	0.0742549	0.0742904	0.0176131	-0.013421	0.152982	0.0110057	0.0293351	0.126544	0.0927184	-0.000977937	0.0544137	0.0759809	-0.00831888	-0.0683212	0.0179709
DYNLT1	green	green	0.19886	0.166121	0.129559	0.0495704	0.208452	0.0311998	0.0713247	0.149319	0.136631	0.107007	0.0551824	0.0717613	0.0063769	-0.0522794	0.126474
ATOX1	green	green	0.216354	0.258406	0.0288591	-0.0298459	0.459925	-0.0258203	0.0441132	0.297497	0.297092	-0.0309906	0.238845	0.214678	-0.0628521	-0.164232	0.157779
ATP5MC2	green	green	0.260916	0.245344	0.08427	0.0984668	0.317853	0.0430391	0.174683	0.252212	0.189162	0.0269328	0.0973846	0.09786	0.0107833	-0.0194584	0.205286
FAM83F	green	green	0.0502377	0.0466443	0.00140751	0.0051388	0.117806	0.0122258	0.019067	0.0983394	0.0605466	-0.00121018	0.0632806	0.0548553	0.000199035	-0.0473784	0.016608
FIBP	green	green	0.149601	0.136964	0.0705546	0.0498783	0.16908	0.0509387	0.0757736	0.137444	0.113794	0.0232944	0.034879	0.0572397	0.00799626	-0.0367818	0.105646
GALNT6	green	green	0.0696482	0.067971	0.0526396	-0.041329	0.168786	-0.031498	0.0038901	0.120712	0.10329	0.0691014	0.0589528	0.0819893	-0.0270183	-0.112826	0.00625396
CNFN	green	green	0.0197342	0.0647107	-0.115266	-0.103922	0.263232	-0.0841607	-0.0367526	0.136208	0.13947	-0.101822	0.252366	0.138247	-0.0542621	-0.0946589	0.00364781
COMMD4	green	green	0.147651	0.133991	0.0418334	0.034735	0.228106	0.0124874	0.0551204	0.155796	0.109869	0.0397659	0.0860555	0.0588939	0.0146636	-0.0375287	0.102646
PLAC8	green	green	0.0616254	0.218711	-0.114073	-0.221364	0.484373	-0.131111	-0.230594	0.186741	0.372281	-0.183029	0.368105	0.319129	-0.152629	-0.274773	-0.0164953
ENSMFAG00000045832	green	green	0.209532	0.197333	0.0737565	0.0345937	0.305	0.0566245	0.117021	0.254539	0.203679	0.0110998	0.098538	0.15195	0.00136055	-0.103115	0.105595
DNASE1L1	green	green	0.0543376	0.0637011	-0.0175056	-0.0146922	0.150112	-0.0123821	0.00702118	0.102485	0.0889178	-0.023044	0.107115	0.0866279	-0.0230044	-0.0540851	0.0129144
NUAK2	green	green	0.124504	0.203025	-0.0358132	0.0132483	0.248576	-0.0263214	-0.0874158	0.0907829	0.191047	-0.111663	0.187312	0.106382	-0.0296644	-0.0200654	0.1611
NSMCE1	green	green	0.0831128	0.109061	0.0301479	0.000985781	0.148712	-0.0125732	0.0153337	0.0818823	0.0952706	-0.00230797	0.0488089	0.0444215	-0.0317501	-0.0421197	0.0856358
KRT16	green	green	0.0572718	0.0335343	-0.0399813	-0.0658881	0.33243	0.0173373	0.204215	0.353901	0.0916204	0.0424902	0.0405055	0.0823058	-0.0362839	-0.201985	-0.133718
TMEM14A	green	green	0.13148	0.153245	0.116188	0.0152881	0.193692	0.0120421	0.0768339	0.138126	0.124471	0.0770341	-0.0146818	0.043661	-0.0290851	-0.0816155	0.0928497
HTATIP2	green	green	0.165722	0.250554	-0.0341771	-0.0352811	0.345536	-0.0355728	-0.0633341	0.15934	0.266084	-0.136653	0.211619	0.177203	-0.0639803	-0.09294	0.154419
BMP1	green	green	0.0811539	0.0512283	0.0595479	0.0333117	0.0820143	0.0145002	0.0394589	0.083258	0.0325523	0.119212	0.00728775	0.0168944	0.0383093	-0.0186699	0.0545836
PLIN3	green	green	0.092346	0.118239	0.0555943	-0.0324091	0.196251	-0.0246384	-0.00549683	0.115457	0.146062	0.00678908	0.0698001	0.105505	-0.0540462	-0.118291	0.0349246
ARPC1A	green	green	0.19931	0.190493	0.0391668	0.0153155	0.303361	0.0422428	0.0827575	0.217645	0.210176	-0.0325741	0.140886	0.161757	-0.0245463	-0.0699468	0.117676
NCF4	green	green	0.0422693	0.0849258	-0.0695647	-0.0711543	0.232988	-0.0174445	-0.00257238	0.158748	0.145419	-0.0874331	0.156176	0.145931	-0.0437099	-0.118222	-0.00998018
CLIC3	green	green	0.119691	0.292459	-0.0326678	-0.140446	0.474914	-0.0710439	-0.116613	0.254144	0.383486	-0.18985	0.193005	0.265387	-0.180579	-0.2756	0.0599827
ARPC3	green	green	0.235997	0.223941	-0.0226589	-0.006487	0.470923	0.0350735	0.067128	0.348727	0.280807	-0.0423737	0.325422	0.253723	0.00575841	-0.14381	0.116114
PPDPF	green	green	0.241914	0.280379	0.0201748	-0.00244771	0.429996	0.021517	0.095842	0.291466	0.294989	-0.0670493	0.150719	0.18309	-0.0550373	-0.143986	0.144272
ZNF185	green	green	0.114706	0.180604	-0.0555812	-0.0721621	0.331309	-0.00914924	-0.110107	0.183928	0.28213	-0.149484	0.220948	0.26932	-0.0824181	-0.154271	0.0417909
ASNA1	green	green	0.114533	0.0983006	0.053551	0.0338456	0.147952	0.0266481	0.0680725	0.119006	0.07374	0.0355876	0.0460481	0.0376166	0.00643794	-0.0244482	0.0816979
COX8A	green	green	0.188098	0.181611	-0.0516228	0.0257045	0.376056	0.02281	0.0972486	0.27291	0.18944	-0.0730294	0.236164	0.150974	0.0230844	-0.0481612	0.0953912
ENSMFAG00000034458	green	green	0.0812586	0.105358	-0.0480845	-0.0719224	0.27288	-0.00905761	-0.0554102	0.167126	0.188973	-0.0689067	0.195974	0.19634	-0.0359371	-0.140733	-0.0166804
RAB11FIP1	green	green	0.0724089	0.197808	-0.180342	-0.138104	0.418127	-0.0850033	-0.281626	0.173971	0.377207	-0.2554	0.473095	0.390239	-0.0873709	-0.174116	0.0508067
CTSA	green	green	0.0574598	0.067364	-0.0274121	-0.00805434	0.144279	-0.0211467	-0.0138016	0.0615095	0.06653	-0.0102127	0.128508	0.0446707	-0.00594883	-0.00934304	0.0570667
MDK	green	green	0.112416	0.0616841	0.053799	0.0366308	0.138475	-0.0606739	0.10069	0.0844785	0.019718	0.199006	0.125312	0.0030402	0.0588589	-0.0208011	0.115298
DDX60	green	green	0.0610575	0.200641	-0.0241087	-0.150952	0.371389	-0.0840027	-0.109147	0.181138	0.290798	-0.126826	0.137232	0.21644	-0.151219	-0.247406	-0.0157413
ENSMFAG00000034410	green	green	0.237735	0.206713	0.066615	0.0698837	0.280668	0.0603314	0.148736	0.228383	0.182998	0.0128365	0.108869	0.122849	0.00630093	-0.0202023	0.148281
VPS35	green	green	0.116139	0.106438	0.0692185	0.0601708	0.109338	0.00805911	0.0282267	0.0694523	0.0692007	0.0466481	0.00414701	0.0222227	-0.0124527	-0.0232447	0.081014
PRDX6	green	green	0.102779	0.054618	-0.140199	-0.0459277	0.386324	-0.0124421	0.113033	0.287397	0.134271	-0.0315871	0.375832	0.193101	0.050848	-0.0545847	-0.00555155
MAPK3	green	green	0.0501675	0.0981124	-0.0492984	-0.0541899	0.208237	-0.074434	-0.0699346	0.0697843	0.122851	-0.0509914	0.188095	0.091711	-0.0433738	-0.0497324	0.0506251
SEPTIN8	green	green	0.0915749	0.157899	0.00288506	-0.042312	0.213018	-0.0491286	-0.0604874	0.0798555	0.166459	-0.046644	0.108588	0.0870112	-0.0574114	-0.0872303	0.0848372
QSOX1	green	green	0.0523258	0.0731434	0.0713461	-0.0375806	0.117395	-0.0340555	-0.0216787	0.0559644	0.0662015	0.0720223	0.0147708	0.0262689	-0.0265208	-0.0775035	0.0294743
SLC25A10	green	green	0.0863783	0.109095	0.0099936	-0.00558432	0.177595	-0.0169513	0.00575432	0.0908322	0.0936624	-0.0111901	0.0877408	0.0425224	-0.0227789	-0.0387877	0.0663821
ENSMFAG00000043832	green	green	0.104515	0.0929441	0.0445093	0.0332099	0.116701	0.0297979	0.0720455	0.10328	0.0687987	0.0215747	0.0270113	0.0395157	0.00805074	-0.0311339	0.05767
NAPRT	green	green	0.20888	0.265358	0.128787	0.0513365	0.294772	0.0117868	-0.0476709	0.169548	0.223568	-0.0013024	0.141494	0.121394	-0.0395928	-0.0887533	0.215845
ENSMFAG00000000784	green	green	0.22113	0.196727	0.0935792	0.051225	0.284538	0.0736337	0.140079	0.249475	0.193156	0.0231358	0.0618196	0.138395	0.0111345	-0.0961133	0.115579
ATP6V0D1	green	green	0.128995	0.130997	0.0277069	0.0329632	0.187812	0.0144954	0.0563871	0.135026	0.114231	0.00653758	0.0772925	0.0730443	0.00238049	-0.0383119	0.103976
NEDD8	green	green	0.263155	0.273217	0.148149	0.0710425	0.304661	0.0645072	0.0706085	0.235981	0.244203	0.0194798	0.0424448	0.141892	-0.0388141	-0.111152	0.186405
ARPC2	green	green	0.326091	0.285842	0.184443	0.0840519	0.419668	0.126	0.147241	0.377061	0.279937	0.104947	0.122668	0.212338	0.0232367	-0.136796	0.183994
ZDHHC12	green	green	0.112298	0.108979	0.0187085	0.0239136	0.168042	-0.00545466	0.0596831	0.097532	0.0633792	0.0367245	0.0661225	0.0142107	0.00582704	-0.0118859	0.0961591
CBLC	green	green	0.0836701	0.145765	-0.0108425	-0.025346	0.243167	-0.0351836	-0.00342986	0.119323	0.15053	-0.0536789	0.104537	0.0882662	-0.0522508	-0.0715759	0.0856573
ENSMFAG00000039608	green	green	0.088926	0.0918121	0.0158379	0.017157	0.159111	0.0167721	0.0731525	0.121168	0.0775819	0.0106962	0.059032	0.0475127	0.01556	-0.0360732	0.0600993
ARHGDIB	green	green	0.131923	0.164449	0.0653731	-0.0428102	0.306034	-0.0270024	-0.0314106	0.176676	0.202205	0.0364934	0.151919	0.150759	-0.0518866	-0.160668	0.0330537
SH2D4A	green	green	0.112153	0.201687	-0.0390222	-0.0534104	0.292767	-0.0444133	-0.142329	0.129279	0.25139	-0.140848	0.228772	0.19013	-0.0837008	-0.114479	0.105039
COA1	green	green	0.0910097	0.110248	-0.0113361	0.00586886	0.203412	0.00977942	-0.0384359	0.12346	0.139886	-0.0540171	0.148023	0.129304	-0.00123357	-0.0491052	0.0630308
NUDT22	green	green	0.0828764	0.0913629	0.0146342	0.0157075	0.149143	0.00149367	0.0397732	0.0923412	0.0721182	0.0161103	0.0584928	0.0370864	0.00129899	-0.0207668	0.0624691
LITAF	green	green	0.10541	0.100032	-0.00151786	-0.0147813	0.217185	-0.0342951	-0.0249468	0.0891463	0.116658	0.0393884	0.204359	0.0919061	0.0271733	-0.0485702	0.0859008
CAPG	green	green	0.200751	0.215252	0.0787623	0.0185114	0.326771	0.00568117	0.0846118	0.252781	0.20225	0.0345539	0.105181	0.117768	-0.036031	-0.108765	0.145584
ENSMFAG00000002099	green	green	0.0408578	0.0494949	0.0111198	0.00144891	0.107328	-0.0230362	0.0119963	0.0526993	0.0403409	0.0250224	0.0572086	0.00850825	-0.0147371	-0.0261483	0.0355295
NDUFB7	green	green	0.244947	0.286302	0.106842	0.0213128	0.373508	0.0287578	0.0547393	0.257353	0.267567	-0.00524155	0.12005	0.151734	-0.0494953	-0.131611	0.180031
SMPD2	green	green	0.0796395	0.0828087	-0.0179017	0.0164806	0.154063	-0.000763601	0.0133732	0.0918207	0.095443	-0.0323364	0.092191	0.0694851	-0.0089989	-0.0403856	0.0470796
AFAP1L2	green	green	0.0847813	0.160335	-0.0121132	-0.0679119	0.274137	-0.0391896	-0.0862272	0.138915	0.22348	-0.087671	0.151416	0.182386	-0.0846868	-0.146098	0.0532991
FRMD8	green	green	0.0954545	0.105154	0.0560182	0.0109796	0.148152	-0.00390431	0.0107467	0.116627	0.122554	0.0105452	0.05503	0.0959822	-0.0150284	-0.0537188	0.0727003
DPY30	green	green	0.137472	0.122952	0.0505839	0.0366215	0.158546	0.0214621	0.0683668	0.117378	0.10247	0.0228913	0.0402876	0.0535837	0.00517556	-0.0202633	0.0989849
ENSMFAG00000002453	green	green	0.0947304	0.138559	-0.0837401	-0.0514853	0.297275	-0.035828	-0.0500205	0.163686	0.194366	-0.133355	0.303906	0.20523	-0.0402544	-0.0661886	0.0831539
TAX1BP3	green	green	0.152834	0.142563	0.0570777	-0.00225963	0.260475	0.0108952	0.0335808	0.196636	0.162176	0.0715456	0.104787	0.118525	-0.0108414	-0.102738	0.0758337
HEBP1	green	green	0.0761859	0.117064	-0.0243967	-0.0192993	0.197377	-0.0381072	0.00540583	0.0871402	0.117479	-0.0479072	0.136559	0.0740572	-0.0185257	-0.0184786	0.0776241
MBOAT2	green	green	0.0271685	0.098825	-0.0761206	-0.126178	0.281388	-0.0701652	-0.0576933	0.149932	0.195335	-0.106921	0.191288	0.187034	-0.0998497	-0.163266	-0.0299022
ENSMFAG00000030344	green	green	0.108106	0.120069	0.0951506	0.0218896	0.135324	-0.00294022	0.030968	0.101116	0.106284	0.0479086	-0.00444221	0.0508872	-0.0330096	-0.062827	0.0759734
RSU1	green	green	0.0878098	0.0851115	0.0300621	0.0061568	0.14955	0.0103456	0.0389149	0.116885	0.0782383	0.0414991	0.0421394	0.0473309	0.00514406	-0.0435999	0.0434729
MRPS14	green	green	0.15177	0.159813	0.0535555	0.0412196	0.206156	0.0330148	0.0493415	0.151779	0.13135	-0.00647528	0.0544614	0.0704302	-0.0141519	-0.04089	0.113043
DHRS11	green	green	0.143673	0.208858	-0.0210627	0.0184036	0.270704	0.00513502	-0.0548164	0.137829	0.214105	-0.11699	0.188151	0.14973	-0.0278783	-0.0475508	0.145939
CLCN3	green	green	0.0936892	0.109785	0.0233359	0.0215385	0.14303	-0.0367581	-0.0189083	0.0412944	0.0822116	0.0132631	0.093502	0.031468	-0.00570048	0.00126916	0.11538
NFKB1	greenyellow	greenyellow	-0.00815548	-0.0764141	-0.0682429	0.0444781	-0.0321433	0.109832	0.00759567	0.047229	-0.0134162	-0.0271561	0.107574	0.125689	0.199406	0.0348245	-0.0494124
ENSMFAG00000043279	greenyellow	greenyellow	0.112066	-0.00529871	0.0585971	0.158771	-0.034925	0.166013	0.111109	0.0749719	-0.0174619	0.0777136	-0.0687063	0.0388127	0.165912	0.0526667	-8.1393e-05
ATP2A2	greenyellow	greenyellow	0.0845363	0.00365468	-0.0247807	0.121536	0.00121335	0.14573	-0.0030708	0.0589622	0.0202527	-0.018358	0.0754689	0.107072	0.193315	0.0620515	0.0287576
ENSMFAG00000044258	greenyellow	greenyellow	0.151841	0.0484357	0.0827833	0.109682	0.0693621	0.182938	0.208163	0.184953	0.0457428	0.0485025	-0.0589126	0.0779094	0.130457	-0.0115375	0.0184561
EXOSC3	greenyellow	greenyellow	0.00879322	-0.04099	-0.027264	0.0522017	-0.0375321	0.0979814	0.0830591	0.0243732	-0.043096	-0.00769892	-0.0331559	-0.00458369	0.122337	0.0293251	-0.0525361
SDCBP	greenyellow	greenyellow	0.0524646	-0.04747	-0.0972556	0.0673092	0.0530814	0.128391	0.0395597	0.121414	0.0151981	-0.0142383	0.18603	0.153991	0.224092	0.0497873	-0.0360024
ENSMFAG00000041970	greenyellow	greenyellow	-0.0514667	-0.202211	-0.205658	0.123559	-0.10626	0.268528	0.127851	0.06342	-0.166877	-0.0536765	0.0723113	0.0256658	0.379421	0.114717	-0.179399
SRSF2	greenyellow	greenyellow	0.104244	0.0184719	-0.00704317	0.188193	-0.0291447	0.244275	0.0565316	0.0820939	-0.0039023	-0.0510841	-0.02203	0.0666146	0.24559	0.10003	0.0286829
LTBR	greenyellow	greenyellow	0.0377198	-0.0283858	-0.0535863	0.0592161	0.010204	0.102371	0.0768983	0.0647948	-0.0153509	-0.0327538	0.0280347	0.047761	0.125979	0.0491615	-0.0233047
SOD2	greenyellow	greenyellow	0.0266648	-0.0756752	-0.151667	0.0682807	0.0242121	0.181449	0.0379267	0.0838274	0.000319489	-0.112522	0.209642	0.167707	0.270418	0.0372594	-0.0763372
ENSMFAG00000042676	greenyellow	greenyellow	0.0130253	-0.0768431	-0.0170524	0.111023	-0.0899977	0.1421	0.0770066	-0.00667732	-0.118224	0.0494699	-0.0460879	-0.0578508	0.226496	0.11273	-0.0459256
URB1	greenyellow	greenyellow	0.00149217	-0.0395355	-0.00752994	0.0718111	-0.0714711	0.101238	0.00525057	-0.00202216	-0.0401097	-0.0164169	-0.0408237	0.00225377	0.0971123	0.0122544	-0.0464857
HYOU1	greenyellow	greenyellow	0.0418709	-0.0213179	-0.00382637	0.0960499	-0.0415915	0.13469	0.00708858	0.0123359	-0.0322146	0.0176262	-0.00852059	0.0210957	0.176904	0.0440887	-0.0115785
ANXA5	greenyellow	greenyellow	0.026432	-0.225542	-0.0736564	0.160005	-0.0801723	0.271386	0.194334	0.147534	-0.16153	0.18447	0.0840546	0.105698	0.41448	0.0818957	-0.187198
TMTC2	greenyellow	greenyellow	-0.00134632	-0.0692424	-0.0338692	0.106017	-0.0896275	0.133083	0.0380818	-0.0177002	-0.079683	-0.0261121	-0.0390856	-0.00753269	0.163709	0.0776449	-0.0363788
BCL2L11	greenyellow	greenyellow	-0.0152915	-0.0991306	-0.0739114	0.0840435	-0.0505361	0.116146	0.0389288	0.0350485	-0.0683339	0.0489496	0.0570847	0.052056	0.235196	0.0519447	-0.054517
PXDC1	greenyellow	greenyellow	-0.0203805	-0.0627389	-0.0393528	0.0539812	-0.0474031	0.0817545	0.0219997	0.0164665	-0.0304509	0.0123544	0.00909406	0.0530767	0.13747	0.0241275	-0.0521557
SLC7A5	greenyellow	greenyellow	0.0172646	-0.083498	-0.0501977	0.195444	-0.134662	0.16937	0.0568244	-0.0420915	-0.136138	0.0300002	-0.035719	-0.0545609	0.273782	0.200029	0.0182537
CD63	greenyellow	greenyellow	0.104648	-0.0647413	0.0118159	0.140594	-0.0371093	0.217201	0.0816749	0.0977372	-0.0391522	0.11681	0.0698927	0.099796	0.282106	0.071698	-0.0414897
ATXN2L	greenyellow	greenyellow	0.0583386	0.00833626	0.0129803	0.0915431	-0.0163169	0.0811112	0.0242862	0.0118225	0.00129504	0.0116431	0.00706203	0.0303697	0.112434	0.0379851	0.0247146
NOP56	greenyellow	greenyellow	0.0243071	-0.115309	-0.0372281	0.161071	-0.129652	0.247669	0.108425	0.0312944	-0.113945	0.0149694	-0.073666	0.00533446	0.270368	0.0888103	-0.0929297
YBX1	greenyellow	greenyellow	0.224097	0.0374404	0.115964	0.21395	0.0575201	0.324556	0.286541	0.269106	0.0270448	0.139691	-0.0758211	0.103114	0.28809	-0.0225168	0.015996
LUZP1	greenyellow	greenyellow	0.0353576	-0.0652694	0.0513512	0.104746	-0.0792879	0.117829	0.0613908	0.0145709	-0.0547404	0.108786	-0.0532864	0.0323857	0.161031	0.0210307	-0.0395896
NIPAL1	greenyellow	greenyellow	-0.050755	-0.154463	-0.0756285	0.093961	-0.100554	0.177736	0.0734127	0.0380287	-0.128977	0.0457332	0.0053119	0.0323078	0.294923	0.0457704	-0.133594
CYSTM1	greenyellow	greenyellow	0.022966	-0.0954283	-0.0489408	0.0754917	-0.0165284	0.144026	0.0911101	0.081869	-0.0695654	0.0627331	0.0666003	0.0482669	0.229188	0.0324165	-0.0853906
MLEC	greenyellow	greenyellow	0.0937082	0.026174	0.00300036	0.0969432	0.0321988	0.122189	0.0415603	0.0663672	0.0153517	0.0291654	0.0350547	0.0477955	0.151176	0.0223824	0.0122875
DNAJC2	greenyellow	greenyellow	0.0548141	-0.0397455	-0.0227523	0.113746	-0.0616067	0.186161	0.0747228	0.0495279	-0.0249307	-0.0118207	-0.0411157	0.0529583	0.189566	0.0379942	-0.0514146
ENSMFAG00000031958	greenyellow	greenyellow	-0.0797208	-0.242444	-0.310412	-0.0132285	-0.00196634	0.188608	0.415887	0.191456	-0.0821345	-0.142118	0.180538	0.181664	0.303253	0.0626477	-0.237412
PUM3	greenyellow	greenyellow	0.0356452	-0.0267799	0.00469456	0.0712955	-0.0465432	0.113342	0.039566	0.0275326	-0.0242695	-0.00108791	-0.0443172	0.0194562	0.10105	0.0197609	-0.0331708
PARM1	greenyellow	greenyellow	0.00737586	-0.110643	-0.103916	0.040652	0.0161609	0.0685234	0.032743	0.0420536	-0.0840519	0.0778599	0.168779	0.0303278	0.227834	0.0607989	-0.0845028
LARP1B	greenyellow	greenyellow	0.0503922	-0.013337	0.0170664	0.099151	-0.046449	0.133633	0.0251591	0.0286209	-0.021897	0.0159574	-0.0384985	0.0271298	0.143661	0.0363745	-0.00498048
SRSF6	greenyellow	greenyellow	0.129647	0.0616167	0.035208	0.152485	0.00347435	0.182995	0.0362061	0.0754328	0.0372405	0.0121004	-0.012896	0.0758633	0.163617	0.0437846	0.06057
UTP20	greenyellow	greenyellow	0.0310169	-0.0293719	0.0081993	0.0921927	-0.0424015	0.0958156	0.0647814	0.0155194	-0.047823	0.0421748	-0.0214474	-0.0103597	0.130936	0.0349764	-0.0167909
VMO1	greenyellow	greenyellow	-0.0397251	-0.144693	-0.206681	0.025931	-0.0167675	0.0883443	0.038473	0.00685895	-0.112031	-0.0496976	0.239041	0.019922	0.251255	0.117721	-0.121912
NET1	greenyellow	greenyellow	0.0402573	-0.104444	-0.0504356	0.205707	-0.117865	0.194925	0.0949661	0.00649952	-0.138128	0.046436	0.0171012	-0.0122298	0.336714	0.184332	0.00154376
CHD1	greenyellow	greenyellow	0.0450635	-0.027896	-0.0146189	0.127403	-0.0482528	0.151588	0.0399453	0.0221977	-0.0383228	0.00810583	-0.0040144	0.0339728	0.195492	0.0616517	0.00309045
RBMS1	greenyellow	greenyellow	-0.00437688	-0.119551	-0.125129	0.0418072	0.0449462	0.101718	0.0548125	0.108996	-0.0604504	0.0512986	0.167813	0.0835435	0.230838	0.0070101	-0.132341
KDM6B	greenyellow	greenyellow	-0.000290192	-0.0464168	-0.0537411	0.0672877	-0.0337422	0.109211	0.00919347	0.0283664	-0.0162199	-0.0143652	0.0518038	0.072435	0.185433	0.0383393	-0.0193861
CDC42EP3	greenyellow	greenyellow	0.0200147	-0.0476815	-0.0203379	0.0572759	-0.0325896	0.0874383	0.0795347	0.0302514	-0.0566322	0.0320656	-0.0144995	-0.00833725	0.124746	0.0457441	-0.0291995
CD3EAP	greenyellow	greenyellow	0.0301594	-0.0400702	0.0164043	0.103935	-0.0629087	0.136281	0.0480027	0.0119428	-0.0457989	0.0353487	-0.0510078	-0.00495826	0.143071	0.0398284	-0.036304
CELF2	greenyellow	greenyellow	0.0427337	-0.0598713	0.0580005	0.0996508	-0.0466792	0.129567	0.0415521	0.0320991	-0.0650125	0.116668	-0.0186527	0.0154448	0.209281	0.00169609	-0.0525146
SPRED1	greenyellow	greenyellow	-0.0247447	-0.118885	-0.0175168	0.107171	-0.140206	0.125452	0.0951318	-0.0455127	-0.158957	0.0706807	-0.0875292	-0.0830873	0.228631	0.100409	-0.0732062
LMNA	greenyellow	greenyellow	0.123596	0.00171423	0.164838	0.242017	-0.104301	0.269098	0.11903	0.0883621	-0.0543973	0.181688	-0.192996	-0.00305087	0.245373	0.0592328	0.0527094
HSPD1	greenyellow	greenyellow	0.129741	0.0135816	0.136934	0.157326	-0.0410364	0.214919	0.145519	0.112023	-0.00685256	0.109198	-0.168199	0.0362709	0.155349	-0.00925233	-0.0121436
HSP90B1	greenyellow	greenyellow	0.126012	-0.0973558	0.279619	0.243398	-0.183221	0.276906	0.139396	0.0446623	-0.142231	0.355984	-0.222882	-0.0433405	0.26957	0.0240266	-0.055882
PUS7	greenyellow	greenyellow	0.0229192	-0.032156	0.0116471	0.0762537	-0.0697478	0.11951	0.0342241	0.0156532	-0.0353328	0.0165606	-0.0555083	0.00989732	0.115134	0.0288304	-0.0370108
HSPA14	greenyellow	greenyellow	0.0184697	-0.0464003	-0.0136049	0.0948687	-0.061769	0.123573	0.0558623	0.0149096	-0.0539606	-0.0060454	-0.0506507	0.0027651	0.134884	0.0449584	-0.042106
ARHGAP5	greenyellow	greenyellow	0.0383559	-0.0285631	-0.000773241	0.0752773	-0.0287403	0.0899043	0.0422392	0.0413624	-0.00802357	0.0303552	0.0276786	0.0644289	0.127715	0.0199802	-0.0133478
PXN	greenyellow	greenyellow	0.0133542	-0.0694874	-0.0218174	0.10852	-0.0512308	0.152315	0.0363537	0.0421671	-0.0525479	0.0342376	0.0319836	0.0551381	0.222712	0.0254182	-0.0524393
PABPC4	greenyellow	greenyellow	0.0585664	-0.0218361	0.00964558	0.120025	-0.0561434	0.151804	0.0506712	0.0478363	-0.0224813	0.0172398	-0.0218472	0.049842	0.152604	0.0357352	-0.00662146
RSL24D1	greenyellow	greenyellow	0.0812597	-0.0260244	-0.0120567	0.121359	-0.03787	0.158475	0.176257	0.0678945	-0.0398378	0.0203065	-0.053879	0.00717103	0.168795	0.0924537	-0.0127637
MALSU1	greenyellow	greenyellow	0.111804	0.0155407	0.053204	0.1389	-0.00954483	0.178005	0.10637	0.086623	-0.00598019	0.042274	-0.0495683	0.026466	0.155269	0.0511394	0.0160525
ENSMFAG00000000823	greenyellow	greenyellow	0.139612	0.0382053	0.0585138	0.12881	0.0552557	0.190472	0.107332	0.162181	0.0442315	0.0488693	0.00262695	0.0997059	0.147893	-0.0210946	0.00105567
PLAT	greenyellow	greenyellow	-0.0154348	-0.132504	-0.191544	0.141383	-0.049543	0.21294	0.0461878	0.0612173	-0.10189	-0.0799607	0.139577	0.0772021	0.346362	0.124024	-0.111747
FST	greenyellow	greenyellow	-0.105559	-0.21043	-0.0880167	0.0504321	-0.148901	0.124329	0.0703676	0.00757461	-0.175656	0.136327	-0.0118234	0.00696815	0.262572	0.0469696	-0.167389
ENSMFAG00000039837	greenyellow	greenyellow	0.110537	0.0278961	-0.0291092	0.0595162	0.0805811	0.112136	0.0905657	0.11118	0.0502663	-0.0155823	0.0857768	0.103856	0.134665	0.0179211	0.00816452
CHSY1	greenyellow	greenyellow	0.0171947	-0.0793103	0.0215555	0.106537	-0.086715	0.124143	0.0688426	0.00136487	-0.103591	0.0981593	-0.0585095	-0.0420812	0.186421	0.0580436	-0.0410386
MAGOH	greenyellow	greenyellow	0.0752714	-0.0225544	-0.0145286	0.130193	-0.0256833	0.194497	0.0996753	0.0797852	-0.0182116	-0.01229	-0.0139188	0.0593228	0.181958	0.0505925	-0.0294047
CDCP1	greenyellow	greenyellow	-0.000738252	-0.100896	-0.0951697	0.0973762	-0.0457478	0.19012	0.0485048	0.0638399	-0.0551655	-0.0276782	0.0661521	0.111101	0.260172	0.028259	-0.116015
PFKFB3	greenyellow	greenyellow	-0.00752586	-0.0793114	-0.109807	0.0593193	-0.00818951	0.0538509	0.00637432	0.0064788	-0.0448572	-0.00832658	0.148657	0.0603504	0.179871	0.102212	-0.0133586
HNRNPU	greenyellow	greenyellow	0.134066	0.0210092	0.0577052	0.187535	-0.0367848	0.221012	0.0662167	0.0826771	0.00824413	0.050122	-0.0259713	0.0870785	0.234347	0.0614754	0.0325857
FBL	greenyellow	greenyellow	0.033748	-0.06642	-0.0184338	0.107198	-0.0901409	0.160851	0.157349	0.0347463	-0.0866614	0.0129775	-0.0831796	-0.0164024	0.181042	0.0892837	-0.0461684
PTPN2	greenyellow	greenyellow	0.0565896	0.00714343	0.0137603	0.0745022	0.0017189	0.0974194	0.0277928	0.0400019	0.0166727	0.00938614	0.0226586	0.0643181	0.104585	0.0176433	0.0017979
ACSL4	greenyellow	greenyellow	0.0257205	-0.0725899	0.0316291	0.0978556	-0.076686	0.115788	0.065356	0.00281796	-0.0888091	0.122052	-0.0450342	-0.0231035	0.194877	0.053893	-0.0337286
FAM110C	greenyellow	greenyellow	0.0230828	-0.0768279	-0.0238697	0.13065	-0.0938913	0.169204	0.0877503	0.0079297	-0.104273	0.0320683	-0.0355309	-0.0149804	0.238279	0.0982773	-0.0384614
DHX9	greenyellow	greenyellow	0.101045	0.028061	0.0697501	0.140335	-0.025413	0.143011	0.0395824	0.059455	0.00406611	0.0560481	-0.0454135	0.0337616	0.132983	0.0338681	0.0242851
PDIA3	greenyellow	greenyellow	0.143896	0.0436352	0.0346449	0.137954	0.0749531	0.156352	0.0500913	0.129163	0.0314261	0.0613957	0.0635976	0.0632738	0.176214	0.0310003	0.0357439
FARSA	greenyellow	greenyellow	0.0579599	0.00602591	0.0137761	0.0737519	-0.0112478	0.101826	0.0432098	0.0367815	0.00186175	-0.00561747	-0.0220592	0.0158574	0.0664047	0.0164978	-0.0121677
MMP10	greenyellow	greenyellow	-0.0828414	-0.233361	-0.0660106	0.093754	-0.180577	0.22704	0.139637	0.0121314	-0.228799	0.130969	-0.0863393	-0.0716757	0.370517	0.0639483	-0.193267
ETS2	greenyellow	greenyellow	-0.00432712	-0.12765	-0.163581	0.133579	-0.0320267	0.184382	0.0990985	0.0870759	-0.0831363	-0.0341826	0.127341	0.103057	0.302998	0.118228	-0.0544814
MET	greenyellow	greenyellow	-0.049239	-0.204984	-0.147524	0.117676	-0.130847	0.189405	0.0706192	0.0163825	-0.148947	0.00468955	0.0946989	0.0657861	0.334795	0.135888	-0.148463
ENSMFAG00000009327	greenyellow	greenyellow	0.018143	-0.074339	-0.039557	0.0855265	-0.0556434	0.0917379	0.0865417	0.0254384	-0.0756282	0.0315224	-0.022043	-0.0127627	0.158072	0.0657387	-0.0431137
TBC1D17	grey	grey	0.089552	0.111519	0.047539	0.0390258	0.0724008	-0.00541799	0.00877838	0.00576813	0.0595077	-0.00504719	-0.00142149	-0.0109909	-0.0155705	0.0236244	0.128592
DNAJC11	grey	grey	0.0575094	0.0374874	0.0423035	0.0389048	0.012592	0.0533426	0.00295613	0.0315786	0.0298887	0.0143507	-0.0206075	0.029656	0.00879455	-0.0162392	0.0284088
BTBD10	grey	grey	0.0691556	0.0564927	0.0109588	0.0315069	0.0547982	0.0415652	-0.00629997	0.0660748	0.0710184	-0.0149269	0.0285564	0.0787444	0.00220347	-0.0287893	0.0282389
LRP1	grey	grey	0.102286	0.0848054	0.266766	0.124569	-0.0715007	0.0275804	-0.018911	-0.0358808	-0.0140658	0.186302	-0.184779	-0.0711619	-0.0167032	0.00378147	0.124249
IFT88	grey	grey	0.0292093	0.0225436	0.0168769	0.0370736	-0.010965	0.00337827	0.00718097	-0.0232977	-0.0156812	0.0219052	-0.0162508	-0.0313907	0.0152606	0.0521029	0.0388035
TSPAN31	grey	grey	0.0543924	0.0539428	-0.00107426	0.0242344	0.0658075	0.0188194	-0.000750688	0.0360937	0.0485833	-0.0224101	0.0565688	0.0396072	0.0193308	0.0143347	0.0455545
YLPM1	grey	grey	0.0969296	0.083641	0.0533476	0.0817013	0.0427399	0.0314783	-0.000283393	0.0267954	0.043788	0.0132682	0.00697	0.0165713	0.0198123	0.0292265	0.0952478
DTYMK	grey	grey	0.155857	0.0999365	0.113927	0.0947592	0.0749531	0.0801441	0.0593246	0.0920311	0.0464012	0.076913	-0.0478896	0.00946272	0.0211999	-0.00858464	0.0760552
DBNDD2	grey	grey	0.0658266	0.0716695	-0.0492467	-0.0031257	0.130171	-0.0162962	0.0360782	0.0890582	0.0727058	-0.0507293	0.0999219	0.0471981	-0.0150903	-0.0015322	0.0303525
TMED10	grey	grey	0.14888	0.1014	0.0973343	0.0776835	0.120061	0.0943221	0.00802923	0.124136	0.103362	0.0694119	0.039693	0.098173	0.0306893	-0.0500031	0.0700987
PSMC4	grey	grey	0.131417	0.0862558	0.0473064	0.0692547	0.107814	0.111493	0.0594717	0.144086	0.0975421	-0.00849497	0.013157	0.0934956	0.0319123	-0.0494057	0.0278143
BABAM1	grey	grey	0.0641562	0.0465469	-0.019891	0.0419821	0.0846477	-0.0239192	0.0473565	0.0509492	0.00952445	0.0115259	0.0590576	-0.019108	0.0208602	0.0632865	0.0668916
COMMD2	grey	grey	0.0799517	0.0597339	0.0356741	0.0433871	0.0645908	0.0490218	0.0307615	0.0718715	0.0462237	0.00458912	0.00994472	0.0308447	0.0228044	-0.0188757	0.0433123
KDM3A	grey	grey	0.0288029	0.0231615	0.0345337	0.0416712	0.000250306	-0.00366384	0.00717681	-0.0046969	0.00017212	0.0458684	-0.0181605	-0.0128392	0.00405836	0.0255087	0.0375848
RPUSD4	grey	grey	0.0547003	0.0317011	0.0093927	0.0482177	0.0257251	0.0671635	0.0252009	0.0466248	0.036909	-0.0186457	0.00794748	0.0549817	0.0362854	-0.0132123	0.0211938
SLC19A2	grey	grey	0.0634166	0.0634352	0.046954	0.0366102	0.0398703	0.0385812	-0.0453812	0.0310154	0.0795076	-0.00475263	0.0148391	0.0855282	0.00936741	-0.00866571	0.0647518
ENSMFAG00000034699	grey	grey	0.0893355	0.0490659	0.0546541	0.0879003	0.00227812	0.0977473	0.0359179	0.0537754	0.0431334	0.0104054	-0.0324139	0.056946	0.0408732	0.0141119	0.0375407
KARS1	grey	grey	0.108589	0.0458727	0.0327366	0.0723629	0.0508927	0.136377	0.0665892	0.121406	0.0635326	0.00972698	0.00180817	0.102114	0.0637428	-0.0381314	0.0028943
SENP2	grey	grey	0.0931013	0.102712	0.03819	0.029247	0.0694359	0.0268077	-0.0486901	0.0372249	0.111486	-0.0464915	0.0401339	0.081203	-0.020663	-0.0166072	0.0781647
DIDO1	grey	grey	0.0634285	0.0491797	0.0455053	0.0547911	0.0173867	0.0294297	-0.0143987	0.0137242	0.0377245	0.00421972	0.00562175	0.0337052	0.0195055	0.0207767	0.0628073
RAB44	grey	grey	0.0642326	0.0354617	0.00672705	0.0558334	0.036856	0.0501117	0.00107578	0.0557602	0.0426571	0.00285832	0.0744038	0.0646834	0.0465022	0.038949	0.0912686
ENSMFAG00000000700	grey	grey	0.0543418	0.0613828	0.00662511	0.00824079	0.0644353	-0.00219345	0.0164865	0.0322987	0.0428923	-0.015752	0.0410318	0.0146748	0.00476024	0.0201334	0.0589015
ZCRB1	grey	grey	0.0873214	0.0852105	0.0244107	0.0444673	0.0701426	0.0251811	0.0146196	0.0444237	0.0564003	-0.00764556	0.0160896	0.0190438	0.00619106	0.0162475	0.0869797
MTG1	grey	grey	0.129087	0.113956	0.0801416	0.0765689	0.0855155	0.0319943	0.060822	0.0630091	0.0548291	0.0374731	-0.0185906	0.00060815	0.0104803	0.0318353	0.112832
JAK1	grey	grey	0.130604	0.0998128	0.0748724	0.0901558	0.0476409	0.075452	0.00512017	0.0505528	0.0825774	0.0195288	0.027669	0.0867012	0.0377371	-0.00167599	0.0846834
ZSWIM8	grey	grey	0.061192	0.0364058	0.0337227	0.0388667	0.017997	0.0386183	-0.0349166	0.0145735	0.0478176	0.0051803	0.0291992	0.0515106	0.0177025	0.00214384	0.0405428
TMEM126A	grey	grey	0.141611	0.107155	0.0488945	0.0735266	0.0893867	0.118323	0.0733144	0.127788	0.0861842	-0.00551156	-0.0027416	0.071298	0.0424584	-0.0230279	0.0577769
SKIL	grey	grey	0.0696658	0.0327185	0.075375	0.0814649	-0.0130861	0.068091	0.0158058	0.0337014	0.0232274	0.0854636	-0.0321902	0.0450088	0.0516498	0.0217192	0.0558809
CNST	grey	grey	0.0534485	0.0367837	0.0458408	0.063932	-0.00162276	0.0462905	-0.0236619	0.0208757	0.0500795	0.0140232	0.00743418	0.0773165	0.0430078	-0.000430777	0.0359629
ATF6B	grey	grey	0.0425381	0.0214581	0.000594758	0.0339901	0.0479692	-0.0337641	0.0245534	0.0120182	-0.0182253	0.0559344	0.0462016	-0.0367568	0.0299313	0.0640657	0.0534731
CTBP1	grey	grey	0.0372754	0.00870133	-0.0168848	0.0523101	0.0137564	0.0182442	0.028716	0.00924444	-0.0226315	0.0192134	0.0226611	-0.0257956	0.0460134	0.0478029	0.039646
ATXN7L3	grey	grey	0.0436325	0.0395314	0.0297605	0.028145	0.0179223	0.0256317	-0.0168718	0.0197142	0.0466277	-0.00787202	0.00784939	0.04338	-0.00153077	-0.0118234	0.0370968
SOX7	grey	grey	0.120789	0.158508	-0.0847007	0.0561006	0.143936	-0.0178799	-0.044217	0.0498007	0.132797	-0.144152	0.148945	0.0675988	-0.0167721	0.0955199	0.173755
UBE2M	grey	grey	0.0565681	0.0431983	0.0398523	0.0199771	0.0416763	0.0536966	-0.0106658	0.0449322	0.0501677	0.0129495	0.00730721	0.0671669	0.0297458	-0.0416378	0.0180506
PPRC1	grey	grey	0.0692524	0.0242002	0.0410911	0.0998128	-0.0255435	0.13952	-0.0163033	0.0374307	0.051001	-0.0183919	-0.0299347	0.0976036	0.0621869	-0.0325543	0.018801
AHCTF1	grey	grey	0.0945447	0.0416988	0.0729594	0.115359	-0.0389274	0.139138	-0.0176384	0.0140805	0.0430671	0.00813995	-0.0583164	0.0777036	0.0473843	-0.0131827	0.0234982
PPP1R13B	grey	grey	0.0521402	0.0564615	0.0290831	0.0352041	0.0402037	0.0184887	-0.0156635	0.0263353	0.0440173	0.00630123	0.0195019	0.0383899	0.00838769	-0.00274018	0.054982
SH3RF1	grey	grey	0.0315164	0.0424946	-0.00202332	0.0413247	-0.00148187	-0.0272631	-0.00838908	-0.0250735	0.00359456	-0.00729219	-0.00347741	-0.0196349	0.000937472	0.0831462	0.101057
SRP54	grey	grey	0.135344	0.0925056	0.0517626	0.0783423	0.0790937	0.0979848	0.0223875	0.106351	0.107771	-0.00611363	0.0293875	0.119344	0.0205629	-0.0181432	0.066767
NCOR1	grey	grey	0.12026	0.112053	0.075343	0.0924042	0.0352183	0.0398949	0.00228601	0.0314317	0.0567367	0.0279051	-0.0240908	0.00786682	-0.00229348	0.0389319	0.118779
MED8	grey	grey	0.11497	0.114455	0.0432774	0.0264752	0.123132	0.0638886	0.0257146	0.125676	0.123528	-0.0446516	0.0191059	0.0951848	-0.0237912	-0.0715135	0.0521276
DVL2	grey	grey	0.0454758	0.0222294	-0.0169582	0.0408504	0.0205859	-0.00968733	0.0457366	-0.00691925	-0.0148566	0.0206264	0.0291431	-0.0347033	0.0460357	0.0864555	0.0565311
ICMT	grey	grey	0.125739	0.117647	0.0712175	0.0374526	0.114275	0.0465728	0.00930221	0.091173	0.110413	0.00847106	0.0213739	0.0808619	-0.00274522	-0.0511946	0.0918356
ZNF706	grey	grey	0.175465	0.116139	-0.0141875	0.0694953	0.199522	0.171193	0.0936411	0.238856	0.178757	-0.088698	0.10532	0.231616	0.0759661	-0.0786152	0.0144957
NUDC	grey	grey	0.105248	0.0337521	0.042778	0.093371	0.0235975	0.129169	0.0805747	0.0916296	0.0204441	0.0329332	-0.0313308	0.0418315	0.083044	0.00494383	0.0176009
ENSMFAG00000040362	grey	grey	0.0406357	0.0295511	0.00444797	0.0600403	0.00588	0.0124734	0.0117853	-0.0126146	-0.00563197	0.00693991	0.0206211	-0.0178328	0.0452116	0.0619996	0.0730181
CIAO2B	grey	grey	0.125477	0.0913778	0.0511835	0.0569034	0.0962327	0.0750107	0.0797978	0.118362	0.0715806	0.0161598	0.0122579	0.0615422	0.0445138	-0.00660437	0.063962
RAP2C	grey	grey	0.0635771	0.0427413	0.0187006	0.021613	0.0487553	0.039806	0.0147458	0.0639449	0.0555795	-0.00111538	0.0292884	0.0714431	0.00376325	-0.0229753	0.0210068
FASTKD2	grey	grey	0.0692256	0.0293012	0.0355838	0.0781849	-0.0127136	0.088216	0.0203794	0.0282244	0.0247179	0.00658437	-0.0441077	0.0322784	0.0195334	-0.0025168	0.00710545
AP4M1	grey	grey	0.0370584	0.035235	0.0494271	0.0297751	0.00525222	-0.00851502	0.0261463	0.00468969	-0.000174222	0.0398494	-0.0319971	-0.0261302	-0.00349533	0.013836	0.0426707
ENSMFAG00000044826	grey	grey	0.0397635	0.043595	0.0160429	0.0148957	0.0431461	0.0110536	-0.0312719	0.0314445	0.0534138	-0.0260776	0.0392867	0.0511901	-0.000997847	-0.00737668	0.033097
RBM34	grey	grey	0.0755551	0.0433258	0.0137281	0.0535217	0.0370582	0.0659065	0.0165782	0.0548092	0.03885	-0.00207606	0.0134567	0.0415892	0.0359745	0.00504743	0.0311877
DYRK1A	grey	grey	0.0579357	0.0448897	0.0497	0.0732378	-0.0149608	0.0374974	-0.0370439	-0.00867027	0.0190667	0.0311489	0.00381651	0.0211805	0.0366804	0.0271781	0.0647393
MRPS16	grey	grey	0.173068	0.131995	0.0713318	0.0843528	0.141751	0.119011	0.0782697	0.15791	0.121153	0.0118834	0.011069	0.102032	0.0300856	-0.0402883	0.0694017
KHDC4	grey	grey	0.06775	0.0499587	0.0368941	0.0557375	0.00948741	0.0793382	-0.00755248	0.0383918	0.0581111	-0.0193964	-0.00326952	0.0795652	0.0279174	-0.0148354	0.0452892
RNF40	grey	grey	0.0771289	0.0727765	0.0623274	0.0426365	0.0213783	0.0252191	-0.00377955	0.0188974	0.048522	0.0220079	-0.0182389	0.024157	0.00909252	0.0180941	0.083805
EDC4	grey	grey	0.0603244	0.0405872	0.0439471	0.0502392	0.0102029	0.0377827	-0.00143006	0.0145761	0.0272149	0.0145092	-0.0125833	0.0320548	0.0223658	0.012198	0.0473823
AKAP8L	grey	grey	0.104288	0.114698	0.0563163	0.0535989	0.0360061	0.00891536	-0.0113143	-0.00550903	0.0635194	-0.00614352	3.57312e-05	0.00613409	-0.0244914	0.0425197	0.126286
METAP2	grey	grey	0.107623	0.0424489	0.0272196	0.0967141	0.0321138	0.123605	0.0621784	0.0914247	0.0372097	0.0155795	-0.0130317	0.0673514	0.0815722	0.00454812	0.0300504
RRP7A	grey	grey	0.115658	0.0921524	0.0556275	0.0482978	0.0699579	0.121236	-0.0107017	0.096914	0.123023	-0.0217953	0.0035687	0.132262	0.00277688	-0.0932814	0.019519
ANKRD13C	grey	grey	0.0636016	0.0549091	0.0455835	0.0284546	0.0408213	0.00160913	0.0111942	0.0293383	0.0357671	0.023896	-0.000932278	0.0163037	-0.00968893	0.000227556	0.0515263
UBAP2	grey	grey	0.0756133	0.0413511	0.0110376	0.0673718	0.0573742	0.0632195	0.00255763	0.0701316	0.0465588	0.00559881	0.057472	0.0715961	0.0531505	-0.00368078	0.0387154
WDR3	grey	grey	0.0464648	-0.0107103	0.0232893	0.0831995	-0.0371157	0.0961338	0.0412449	0.0342206	-0.0148082	0.0174041	-0.0358252	0.0261148	0.0507018	0.00146291	-0.0236565
FAM174A	grey	grey	0.0718278	0.0759179	-0.00547076	0.0292238	0.0811963	-0.0022548	-0.00696876	0.0337503	0.0523614	-0.0162616	0.0555496	0.0148866	0.00805725	0.0259709	0.088559
MRPS7	grey	grey	0.111877	0.0707564	0.0329553	0.0821307	0.0645477	0.108181	0.0849855	0.106599	0.0484162	0.0097362	-0.0200422	0.0357035	0.0430267	-0.00415566	0.0440903
CAMTA1	grey	grey	0.0868473	0.03286	0.0407961	0.0640557	0.0376977	0.0979435	0.0359704	0.0795806	0.0533789	0.036111	0.00570178	0.0893234	0.0496455	-0.0269578	0.00830055
TOR3A	grey	grey	0.0702459	0.0571464	0.0486106	0.059876	0.029521	0.0148232	0.0280686	0.00412199	0.00412498	0.0447415	-0.00960845	-0.031493	0.0345604	0.0561686	0.0815314
CCAR1	grey	grey	0.163767	0.118933	0.113208	0.119575	0.0624481	0.065162	0.036529	0.0559085	0.0657332	0.0691863	-0.029277	0.027398	0.0292809	0.0223161	0.121785
RPS6KA1	grey	grey	0.106754	0.0866887	0.126084	0.0852152	0.0138664	0.0480563	-0.0105483	0.0211727	0.0455129	0.0734369	-0.028309	0.018138	0.0106233	-0.00831865	0.0880173
VEZT	grey	grey	0.0334005	0.000518612	-0.00997098	0.020124	0.0162457	0.0603743	0.00886884	0.0618903	0.0488758	-0.0179021	0.00719769	0.104838	0.0376343	-0.036212	-0.0386851
FOXN3	grey	grey	0.0949248	0.133357	0.0345037	0.058832	0.0381701	-0.00767074	-0.0281423	-0.0255118	0.0739871	-0.0497154	0.00242238	0.00695856	-0.0249917	0.0511315	0.167817
KAT5	grey	grey	0.0772984	0.0777507	0.0258613	0.0524936	0.0311728	0.0288862	-0.00183989	0.00383003	0.0478903	-0.0220306	-0.00343326	0.0162806	0.00435457	0.0436948	0.0830109
STK17B	grey	grey	0.0703539	0.0438363	-0.0192245	0.0241506	0.0951176	-0.00381743	0.00840278	0.0548865	0.0514819	-0.00240949	0.0960507	0.0443386	0.013219	0.0124859	0.0428334
PEX13	grey	grey	0.0918979	0.0850159	0.0512755	0.0179819	0.0624027	0.0238761	-0.0166368	0.0446088	0.0966513	-0.0237072	0.0114394	0.0742264	-0.0242331	-0.0348442	0.0672389
IWS1	grey	grey	0.110047	0.0882196	0.0589865	0.0720272	0.039669	0.0669248	-0.0149293	0.0509812	0.0745085	-0.00276343	0.001268	0.0685081	0.00357384	0.000184029	0.0778597
MED30	grey	grey	0.100044	0.087955	0.033671	0.0513373	0.0405423	0.0639672	0.0392775	0.0679486	0.0891944	-0.0505024	-0.0361624	0.0767655	-0.0137182	-0.0138928	0.0654974
FAM120AOS	grey	grey	0.118521	0.104861	0.0114144	0.0729677	0.0840521	0.078798	0.00585357	0.0637936	0.0911009	-0.0359426	0.0523453	0.0798626	0.0297053	0.0206701	0.0946138
ZBTB21	grey	grey	0.0465445	0.026371	0.0551983	0.0637755	-0.0426713	0.0623398	0.00316113	-0.000290942	0.0126442	0.0281378	-0.0533045	0.0196462	0.0293558	0.011222	0.0313799
ZNF654	grey	grey	0.0243173	0.0315336	0.0118234	0.0190632	0.0154289	0.00226356	-0.0207829	0.00559199	0.0267113	-0.00597073	-0.000880333	0.0193897	-0.00132496	-0.00898049	0.00826735
TLE3	grey	grey	0.0641422	0.0544753	0.0529871	0.0620835	0.00468612	0.0744458	-0.0281025	0.0458452	0.0542154	-0.000183025	-0.00815797	0.0630475	0.0304988	-0.021393	0.0507566
ENSMFAG00000045172	grey	grey	0.0289339	-0.0109954	-0.0356638	0.0246638	0.0353124	-0.00765423	0.0569804	0.0116149	-0.0226069	0.0400755	0.0614274	-0.0167995	0.0392055	0.0776076	0.00488571
NLRC5	grey	grey	0.0349626	0.0144584	0.0442541	0.0207351	0.0239652	0.0390922	0.0165282	0.0521865	0.0432808	-0.00135439	-0.0163279	0.0623692	-0.0113926	-0.0426383	-0.00857181
FRMD6	grey	grey	0.0907529	0.0636093	0.0526129	0.0715637	0.0341869	0.089253	-0.0104323	0.0709025	0.0717282	0.0344994	0.00707177	0.0883097	0.0508321	-0.0292152	0.0625698
MYO5A	grey	grey	0.0115952	-0.0452596	0.0252733	0.035761	-0.00335184	0.0226569	0.053454	0.0317343	-0.0546337	0.0927932	-0.000907958	-0.0241067	0.0674262	0.034926	-0.0179802
KLHL21	grey	grey	0.0392077	0.0481817	0.0175701	0.0367108	0.0330657	0.0257091	-0.022359	0.0259365	0.0502113	-0.00922589	0.0319538	0.0528883	0.0404712	0.0227297	0.0590317
TMUB1	grey	grey	0.0615639	0.0730345	0.000161732	0.0261196	0.0629972	0.00159422	0.0176172	0.024202	0.0378569	-0.0195321	0.0344353	-0.00287298	-0.00303991	0.0202567	0.06483
PFKM	grey	grey	0.0460251	0.04771	0.0640876	0.0438428	-0.0153896	0.000948523	0.0223301	-0.0144412	0.0041478	0.0317433	-0.0629942	-0.0410438	-0.0213151	0.0346013	0.0723602
YIPF3	grey	grey	0.114745	0.109574	0.0548442	-0.00199567	0.153599	-0.055468	0.0345279	0.0633156	0.0781633	0.0814345	0.103657	0.023545	0.00628315	0.000495656	0.106292
RXRB	grey	grey	0.0686881	0.0697612	0.0381733	0.0475974	0.0164819	0.00504708	0.0263642	-0.00640234	0.0211654	0.0119032	-0.0269181	-0.0216174	0.00448366	0.0593294	0.102598
GOSR1	grey	grey	0.046961	0.0455692	0.010799	0.0200774	0.0334977	0.0194143	0.00939761	0.0231932	0.0431626	-0.0201244	0.0240727	0.0274825	0.00126005	0.00392851	0.0454764
PRRC2B	grey	grey	0.0756705	0.0526902	0.0263975	0.0853477	0.00952236	-0.010511	0.0224038	-0.0265445	-0.00969259	0.0682617	0.00918945	-0.037175	0.0606994	0.0905484	0.114881
ENSMFAG00000026126	grey	grey	0.221391	0.153248	-0.0133282	0.121146	0.202988	0.0738539	0.149889	0.178367	0.103827	-0.0117616	0.177985	0.0753076	0.102096	0.113608	0.185995
ACAP2	grey	grey	0.115141	0.0912454	0.0537684	0.100327	0.0506485	0.0524957	0.00819988	0.0268264	0.0533006	0.0207139	0.0238608	0.0346066	0.0400238	0.0280734	0.106362
SIRT1	grey	grey	0.0299506	0.00840284	0.0441657	0.0682826	-0.0498546	0.00588058	-0.00260568	-0.0562975	-0.0208586	0.0410044	-0.034204	-0.0308989	0.0233725	0.0866049	0.0818138
TIPRL	grey	grey	0.118044	0.099729	0.0961317	0.044763	0.0813735	0.0431814	0.0529999	0.0814191	0.0697682	0.0350038	-0.013759	0.0376762	0.00302887	-0.021443	0.0690552
ADAM10	grey	grey	0.124057	0.0876351	0.107936	0.0848571	0.0674363	0.0598754	0.0318999	0.0690101	0.0610551	0.105634	-0.00563324	0.0378198	0.0403112	-0.0157124	0.0785546
GTF2H4	grey	grey	0.0764143	0.0682365	0.0631464	0.0414493	0.0421031	0.031425	0.0288194	0.0510376	0.0372372	0.0343143	-0.0358342	0.00774757	0.0100503	-0.0141865	0.0501546
HERC1	grey	grey	0.0599225	0.0770196	0.0227098	0.0384129	0.0273485	-0.0379306	-0.0484797	-0.0368145	0.0375514	-0.0121076	0.0376636	-0.0162819	-0.017617	0.0550994	0.101198
PDCD11	grey	grey	0.0759926	0.0260105	0.0525677	0.0824339	0.0027227	0.101137	0.00757933	0.0459104	0.0222861	0.0380044	-0.0262215	0.0353138	0.0492716	-0.00451865	0.0186684
ENSMFAG00000041956	grey	grey	0.0733741	0.0681143	0.0446458	0.0428914	0.0291226	0.0162294	0.0131963	0.0136474	0.0225001	0.0248918	-0.00094509	-0.0090089	0.0153155	0.0198111	0.0751083
ARPC4	grey	grey	0.12352	0.102597	0.0593942	0.0352367	0.125498	0.0543931	0.0365351	0.128632	0.0990785	0.0323528	0.0157542	0.0724149	-0.0024246	-0.0563103	0.0475691
FEM1B	grey	grey	0.110567	0.0959951	0.0781016	0.0372221	0.0775404	0.0244757	-0.0112693	0.0805411	0.105024	0.00964471	0.0154387	0.0941404	-0.0116114	-0.0375602	0.0821355
ENSMFAG00000042142	grey	grey	0.101412	0.0819264	0.0477142	0.0923185	0.0219892	0.0986516	0.00733911	0.0622875	0.0731892	-0.0156738	-0.0291012	0.0651626	0.0223031	-0.00885165	0.0537487
DERA	grey	grey	0.0762818	0.0641888	0.0246334	0.0388619	0.0722827	0.0446566	0.0394372	0.0621089	0.0424314	0.000437822	-0.00522317	0.0160827	-0.000186445	-0.00702421	0.0374533
LDLR	grey	grey	0.0824409	0.0894773	0.105347	0.0720578	0.0166718	0.115386	-0.065948	0.0505966	0.104954	-9.60997e-05	-0.048025	0.112105	0.014567	-0.0822687	0.0359943
GAA	grey	grey	0.0590979	0.0580524	0.00361274	0.0479917	0.0313044	-0.0106856	-0.0113338	-0.018671	0.0139766	0.0051464	0.0505294	-0.0138769	0.0259584	0.0682238	0.100023
ERCC3	grey	grey	0.0902547	0.0730522	0.0757451	0.0499346	0.020397	0.0536322	0.00209463	0.0350841	0.066299	0.0161037	-0.0303929	0.0497175	-0.00124945	-0.0208304	0.0746732
ENSMFAG00000039146	grey	grey	0.124669	0.0648313	0.156222	0.0890986	0.0323932	0.0913497	0.0337881	0.101615	0.0462974	0.114234	-0.0494324	0.0392663	0.0283984	-0.0617136	0.0533093
FBXO38	grey	grey	0.0669848	0.0569515	0.0356777	0.0370373	0.0521105	0.0176762	-0.00740163	0.0394106	0.0548256	0.0160725	0.0272405	0.0518456	0.00532623	-0.0116395	0.0399758
NR4A3	grey	grey	0.0235713	0.0417299	-0.0567279	0.00707218	0.0856226	-0.0733225	-0.00353843	-0.0139941	0.0249614	-0.0188124	0.125941	0.00677984	0.0219613	0.0718539	0.0944373
XPA	grey	grey	0.0944665	0.0884663	0.033183	0.0473385	0.0704756	-0.000521222	0.0247359	0.0375346	0.0442364	0.0195176	0.0339574	0.00228061	0.0277376	0.0455049	0.104389
PHF20	grey	grey	0.0610382	0.0449634	0.0911004	0.0419811	-0.0165886	0.0255064	0.0140503	-0.00252349	0.00491216	0.0715368	-0.0588374	-0.0197929	-0.00804129	0.022672	0.0519483
RAB3GAP1	grey	grey	0.0956226	0.103276	0.0667852	0.0391943	0.0674306	0.0380842	-0.0388215	0.0309588	0.100741	-0.00554761	0.00423129	0.0708213	-0.0298273	-0.0424372	0.073948
CTNNBL1	grey	grey	0.0913568	0.0509248	0.0596544	0.0530314	0.0454098	0.0639201	0.0284243	0.0611236	0.0415871	0.0340389	-0.0149266	0.0286382	0.0170848	-0.00862191	0.0302481
TRIR	grey	grey	0.176245	0.13822	-0.000584981	0.0665249	0.174545	0.0741718	0.0890853	0.146088	0.135749	-0.0446203	0.101728	0.122015	0.0358827	0.00557459	0.110957
CELSR1	grey	grey	0.037774	0.000136575	0.0395075	0.0644566	-0.00342112	0.0548187	0.00409217	0.0255247	-0.0163427	0.0549128	-0.00994605	0.00109941	0.0380574	0.0109679	0.0202345
PSMC1	grey	grey	0.173828	0.146385	0.0621977	0.0634747	0.175307	0.0889583	0.0485651	0.160333	0.140537	0.00254834	0.041733	0.0957676	-0.00641734	-0.0479833	0.0860135
ATP2B4	grey	grey	0.0834254	0.0815801	0.0424168	0.0545495	0.0772869	0.00941189	-0.00278748	0.0503877	0.0393234	0.0627548	0.0232047	-0.00912137	0.0349178	0.0134752	0.102508
SYNRG	grey	grey	0.0665607	0.0583004	0.0484448	0.0539072	0.025722	0.0327499	0.00483849	0.0266667	0.0293524	0.0234503	-0.0126489	0.00615021	0.0196957	0.0190355	0.0724489
ACAT1	grey	grey	0.0774851	0.0802479	0.0465392	0.0426371	0.041063	-0.00285073	0.0361005	0.0142141	0.0349373	0.0171747	-0.0269941	-0.0300545	-0.0080206	0.035471	0.103904
FSCN1	grey	grey	0.0693249	-0.0975359	0.168696	0.156787	-0.0895493	0.241504	0.179443	0.142069	-0.102438	0.233716	-0.165603	0.0128119	0.184943	-0.0480522	-0.107167
MCM3AP	grey	grey	0.0547153	0.0375731	0.0601916	0.0310787	0.0159971	0.0467042	-0.022435	0.0234768	0.0424135	0.0107403	-0.0157907	0.0452469	0.00509072	-0.0324259	0.0238264
ACTR6	grey	grey	0.0848622	0.0579053	0.041282	0.05051	0.0427654	0.0327304	0.0313535	0.0274401	0.0355864	0.0124295	0.00426052	0.00520854	0.0196231	0.0141081	0.0627957
CSTF3	grey	grey	0.0975431	0.0762084	0.0717065	0.0693149	0.063111	0.0701583	0.0178795	0.0777569	0.06555	0.0394054	0.00236723	0.0536884	0.0131655	-0.0321213	0.0568071
CCDC9	grey	grey	0.0775522	0.0623698	0.027539	0.0506607	0.0262205	0.0668035	-0.00726755	0.0356374	0.060596	-0.0182675	0.014473	0.0613343	0.0208182	0.010565	0.0527727
RGS14	grey	grey	0.0585865	0.0739039	-0.00741329	0.0404569	0.0570911	-0.0244216	0.0162156	0.00775268	0.0153495	0.0075428	0.0224344	-0.0461463	0.00395641	0.0533613	0.0995487
EMC3	grey	grey	0.0985406	0.0889342	0.0159997	0.0336666	0.0948347	0.0566443	0.0114397	0.0888165	0.0965388	-0.034584	0.0439355	0.08099	-0.00866387	-0.0225005	0.0621956
LPCAT4	grey	grey	0.0833584	0.137544	0.00715843	-0.0237962	0.164032	-0.0184971	-0.0600026	0.0793864	0.153625	-0.0552055	0.0838689	0.102168	-0.0619524	-0.0723651	0.0704457
TFEB	grey	grey	0.0624257	0.0733353	0.0246296	0.0545666	0.026149	0.0247916	-0.0411603	0.00497011	0.0497776	-0.044237	0.028742	0.0317988	0.0137679	0.0264769	0.089918
TRIM35	grey	grey	0.0445669	0.0330372	0.0228749	0.0215718	0.0106426	0.057111	-0.0238712	0.0489223	0.0668681	-0.025089	0.0198596	0.103457	0.00911992	-0.0299534	0.00823384
MYSM1	grey	grey	0.0416171	0.0211192	0.0398177	0.0759595	-0.0309534	0.0550568	-0.0316289	-0.000942504	0.0167747	0.00767196	-0.019678	0.040435	0.0284988	0.0119725	0.0229188
YEATS4	grey	grey	0.0714158	0.0669742	0.0228412	0.0487989	0.0615095	0.00372663	0.043806	0.0342467	0.0282745	0.0207812	0.00388289	0.000147674	-0.00149868	0.0318213	0.0694492
LRWD1	grey	grey	0.0714879	0.0273507	0.0420657	0.0563198	0.0032143	0.0703545	0.0398102	0.0372026	0.0114952	0.0440632	-0.0325283	0.0132063	0.0296335	0.0234195	0.0340573
TBPL1	grey	grey	0.0536865	0.041221	0.00770929	0.0371616	0.0196565	0.0318542	0.0307895	0.0199665	0.0253483	-0.00294181	-0.00776556	0.0084788	0.0145022	0.034655	0.049372
ENSMFAG00000044928	grey	grey	0.0685426	0.0694031	0.0318688	0.0225167	0.0453274	0.0369095	-0.0366323	0.0400659	0.0832669	-0.0219777	0.025888	0.0824806	-0.0152221	-0.0270818	0.0341727
NELFB	grey	grey	0.0805537	0.0865498	0.0295583	0.0557319	0.0474865	-0.000365269	-0.00335694	0.0101013	0.0396124	0.00119105	0.0207346	-0.00353067	0.00605694	0.036631	0.0890879
GLMP	grey	grey	0.0665901	0.0643762	-0.0119408	0.00877782	0.125933	-0.0500632	0.0258225	0.0506136	0.0326367	0.0239584	0.12929	0.000896714	0.0132761	0.021236	0.0723075
ENSMFAG00000043408	grey	grey	0.041447	0.0147505	0.0224184	0.0647177	-0.0223649	0.0526645	0.017851	-0.00159106	-0.0131413	0.0140735	-0.0254247	-0.00921803	0.0299904	0.037729	0.0231353
TTYH3	grey	grey	0.0578433	0.00778405	0.0525026	0.0608917	0.0142755	0.0216607	0.0488889	0.0237535	-0.0335676	0.138301	0.00673514	-0.0333247	0.0542874	0.0354908	0.0522182
API5	grey	grey	0.0714525	0.0505897	0.036147	0.0699436	0.0160745	0.0524504	0.00346345	0.0370091	0.038775	0.00049295	-0.0149003	0.041771	0.0285662	-0.000924091	0.0357594
HDAC4	grey	grey	0.0460147	0.0652934	0.0368127	0.0270405	0.0223506	0.0264391	-0.0413812	0.0105726	0.0589259	-0.0217902	-0.0161586	0.0323773	-0.0245119	-0.0266145	0.0587394
POLE3	grey	grey	0.122457	0.0896504	0.0468391	0.0962174	0.0345217	0.0855581	0.0449139	0.0400791	0.0369243	0.00443707	-0.0232072	0.00557963	0.0375698	0.0513427	0.0999521
EGR2	grey	grey	-0.0211105	-0.0355022	-0.0981832	0.0501898	0.00282276	-0.0293734	0.034362	-0.0193302	-0.0603809	-0.0227831	0.0963375	-0.0459972	0.0890553	0.16781	0.0714319
SRF	grey	grey	0.0296265	0.0280447	0.028151	0.0361526	-0.000723063	0.0369066	-0.0382846	-0.000490104	0.0207532	0.015644	0.00989908	0.0308823	0.0227489	-8.03058e-05	0.0346676
ENSMFAG00000032389	grey	grey	0.108698	0.0791224	0.0594011	0.0868116	0.0109986	0.123092	0.0200224	0.0573451	0.0751923	-0.0361255	-0.0527772	0.0717632	0.017764	-0.0206167	0.0551507
ORC4	grey	grey	0.0104894	-0.0042775	0.00330054	0.023066	-0.0253421	0.0116242	0.0241361	-0.010818	-0.024286	-0.00072115	-0.0242315	-0.0334752	0.0114695	0.0358485	0.00787403
PTAR1	grey	grey	0.0689343	0.0497911	0.00965249	0.0334716	0.0387251	0.0419768	0.0100104	0.0324198	0.0397525	-0.0284173	0.0172126	0.0279387	0.0208194	0.00443969	0.0416762
TRMU	grey	grey	0.0608857	0.0374216	0.0398644	0.043629	-0.000688332	0.0676524	-0.00499706	0.0206629	0.0325749	-0.0126672	-0.0228865	0.0285761	0.0186499	-0.0128203	0.0252444
CYLD	grey	grey	0.0341925	0.0270478	-0.00250956	0.0367452	0.0285284	0.0568637	-0.0223538	0.0367406	0.0629834	-0.0154197	0.0612664	0.104716	0.0259347	-0.0241028	0.028418
ATG5	grey	grey	0.0686564	0.0282203	-0.0235371	0.0179152	0.0846363	0.0513608	0.0237355	0.0772715	0.0582047	-0.0121138	0.0880768	0.0925047	0.0322497	-0.0202383	-0.00239486
NUDCD2	grey	grey	0.100748	0.0840721	0.0661074	0.0418033	0.0676035	0.00223175	0.0951269	0.0518998	0.00730165	0.0672649	-0.0216388	-0.048582	0.00331138	0.0396157	0.0958126
CPAMD8	grey	grey	0.0358184	0.047241	0.0934807	0.0574232	-0.0330103	-0.0101514	-0.0252298	-0.0431003	-0.00383579	0.0618781	-0.0634833	-0.0448633	0.00553551	0.0366833	0.0713893
ALG3	grey	grey	0.0642379	0.0424415	0.00907091	0.0446306	0.0482572	0.0289176	0.00659495	0.0481615	0.0290192	0.0173028	0.0356453	0.0184296	0.0367963	-0.00383195	0.0352899
ZC3H13	grey	grey	0.0779755	0.0470154	0.0323212	0.0899407	0.0131056	0.0373121	0.0299612	0.00483495	-0.00241537	0.0413252	0.00338432	-0.0200578	0.0338921	0.0704891	0.064611
ZNF76	grey	grey	0.0652027	0.0729815	0.0381786	0.0248699	0.0449348	-0.0187128	-0.0161644	0.00144473	0.0338889	0.0302016	0.0101517	-0.0134335	-0.00914202	0.0208996	0.0859688
FARP2	grey	grey	0.0703724	0.0675096	0.0127023	0.0449916	0.040368	0.0393212	-0.0120988	0.0362721	0.076611	-0.0464051	0.0218329	0.0699204	-0.00168598	-0.0113613	0.040947
PTPRA	grey	grey	0.0704221	0.0630854	-5.14449e-05	0.0508616	0.052271	-0.00678711	0.0166616	0.0244788	0.0325317	-0.00182846	0.0496257	0.007415	0.0229616	0.0445754	0.0762819
TMEM176B	grey	grey	0.0785776	0.0592258	-0.0276375	0.0580307	0.0385513	0.00660843	0.000374696	-0.0134797	0.0208413	-0.029076	0.107326	0.00639751	0.0472386	0.101478	0.101236
GNAI1	grey	grey	0.118161	0.114207	0.0445333	0.0666041	0.0688038	0.0547698	-0.0183326	0.0677004	0.107348	-0.029405	0.0410959	0.096398	0.00935023	-0.0154149	0.0932336
SUPV3L1	grey	grey	0.0551996	0.0159528	0.0407254	0.0543615	-0.0172618	0.0910207	0.0243696	0.0330558	0.0260002	-0.000738498	-0.033971	0.0524757	0.0325446	-0.0254929	-0.00798763
SLC25A26	grey	grey	0.0650667	0.0685897	0.0492677	0.0258967	0.0381835	0.0130059	0.0104654	0.0139855	0.0517351	0.0137712	-0.0255648	0.016881	-0.0331882	-0.00523646	0.045949
SMIM10L1	grey	grey	0.0577677	0.0364229	0.0408509	0.0620389	0.0051667	-0.00160657	0.0521151	5.10223e-05	-0.0244022	0.0565731	-0.0410061	-0.0625716	0.0219752	0.0723185	0.0808996
PLEKHA3	grey	grey	0.0787025	0.0487619	0.0326273	0.0556496	0.00785484	0.0748955	0.0157656	0.0259763	0.0414107	-0.0039435	0.0064596	0.0501116	0.0280497	0.0112614	0.0443866
KATNBL1	grey	grey	0.0885851	0.109643	-0.0190884	-0.027279	0.172801	-0.00416336	-0.0542573	0.105267	0.154506	-0.0714572	0.126171	0.152183	-0.0317713	-0.0654019	0.0449826
AP1G1	grey	grey	0.0646839	0.0555666	0.0378776	0.0346676	0.029407	0.0473507	-0.0165942	0.0402101	0.0596961	-0.00599675	0.00470441	0.0600894	0.00692153	-0.0176444	0.0458551
TMEM106B	grey	grey	0.0725647	0.081458	0.0100379	0.0466465	0.0686789	-0.00612548	0.0172976	0.0203966	0.0469201	-0.00968733	0.0196994	0.00465414	0.000132432	0.0307296	0.0943418
TMEM11	grey	grey	0.0947416	0.0842397	0.00912224	0.0290603	0.0802512	0.0559773	0.0151057	0.0881203	0.0903442	-0.0508005	0.0364953	0.08862	-0.0036434	-0.0230536	0.0473054
GABARAPL1	grey	grey	0.0960008	0.0942828	0.160429	0.0595308	-0.0251448	0.0141657	0.0145883	-0.0293286	0.0394164	0.0713296	-0.108631	-0.0122579	-0.0194428	0.0308156	0.132748
FBXO28	grey	grey	0.0678662	0.0423422	0.0336043	0.0305094	0.0345002	0.0437188	0.00819543	0.0489498	0.0508424	-0.00070089	0.0139954	0.054789	0.0226202	-0.00600112	0.0266744
C2orf76	grey	grey	0.0852937	0.0765254	0.0346564	0.0398552	0.0499173	0.0398033	0.0349814	0.0507733	0.051325	-0.0089089	-0.010136	0.0261412	0.00760174	0.0210907	0.0704418
TWISTNB	grey	grey	0.0956226	0.0522586	0.0414141	0.0881523	0.00510594	0.112806	0.0375638	0.0456612	0.045424	0.00187333	-0.0321489	0.0507494	0.0276649	0.0120493	0.0380918
ZMPSTE24	grey	grey	0.0816272	0.0820281	0.0467117	0.0394974	0.0591111	0.0203813	-0.0149071	0.0333517	0.0661044	0.00142366	0.0341886	0.0380451	-0.00216784	-0.00493547	0.0812911
SH3RF2	grey	grey	0.0434997	0.0480331	-0.021506	0.0253754	0.069127	-0.0491738	0.0350258	0.0175503	0.0121001	0.00776751	0.0256158	-0.0324447	-0.00398946	0.0596668	0.0654112
ECD	grey	grey	0.0372228	0.0346287	0.0189161	0.0189273	0.0135877	0.0189512	-0.00443345	0.0204449	0.0284562	-0.0124135	0.0172541	0.0204874	-0.00158504	0.0116976	0.0280145
SMARCC2	grey	grey	0.0699989	0.0548545	0.0145082	0.0601058	0.0233144	0.000973813	0.0293534	-0.000358787	0.00962879	0.0205095	0.0146681	-0.0188182	0.024993	0.0722592	0.0871966
WDR48	grey	grey	0.0459366	0.0277749	0.0424156	0.0579929	-0.00890875	0.0213941	-0.00113498	0.000721822	0.0181929	0.0161152	-0.0229187	0.0148031	-0.00460261	0.0186042	0.0473366
MRPS24	grey	grey	0.135134	0.120484	0.0731515	0.0660653	0.11571	0.0383166	0.105437	0.0911757	0.0520007	0.0433167	-0.0143519	-0.0169149	0.0123997	0.00833742	0.0938907
MRPL52	grey	grey	0.125895	0.0888737	0.0403677	0.0507432	0.103182	0.0900284	0.0651855	0.125308	0.0934958	-0.00701478	0.0098988	0.086772	0.0124439	-0.0416726	0.0439168
PRKRIP1	grey	grey	0.0495897	0.0288088	0.0284031	0.039464	0.0263312	0.0491297	0.00831874	0.0368319	0.0364781	0.00524265	-0.00601721	0.0446497	0.00309761	-0.00937972	0.0078392
SETDB1	grey	grey	0.0642117	0.0539086	0.0389998	0.0376208	0.0254313	0.0236008	-0.0116129	0.0257879	0.0389191	0.0105622	-0.00563665	0.0280211	0.00109331	-0.00809587	0.0488899
DRG1	grey	grey	0.080635	0.0659372	0.0409209	0.0352763	0.0498993	0.0573161	0.0226931	0.0668382	0.0703581	-0.0240073	0.000731923	0.0491428	-0.000415479	-0.0204391	0.0445775
RSPRY1	grey	grey	0.0799128	0.0628136	0.0820803	0.066128	0.0139859	0.0298356	0.0135021	0.00945771	0.0238973	0.0593249	-0.0288739	-5.69944e-05	0.00205169	0.0109841	0.0702969
MLST8	grey	grey	0.0718906	0.0570778	0.0318617	0.043064	0.0279201	0.00691328	0.026494	0.0157733	0.0138192	0.0289875	-0.0228906	-0.0239914	0.00361199	0.0398159	0.0617303
ENSMFAG00000002535	grey	grey	0.20018	0.118709	0.0881074	0.166748	0.0278832	0.200154	0.0818385	0.110099	0.0915016	0.00505509	-0.0492363	0.105064	0.0920091	0.0139154	0.0890297
USB1	grey	grey	0.0994805	0.0791177	0.0668204	0.0465607	0.0459732	0.0741806	0.0116182	0.0738308	0.0740767	0.00554073	-0.0275925	0.0640112	0.00727227	-0.0359093	0.0556029
FAM172A	grey	grey	0.0740534	0.0586452	0.0239701	0.0646518	0.0131308	0.016053	0.0404794	0.00769224	0.00974691	0.00869593	-0.00558626	-0.0209343	0.0253954	0.0678071	0.0809626
PRKAG1	grey	grey	0.0926107	0.0955524	0.03341	0.0378965	0.0776345	0.0299364	0.00460801	0.053575	0.0810176	-0.0103275	0.0155355	0.0497992	0.00778386	-0.0113102	0.082254
ENSMFAG00000031284	grey	grey	0.0781538	0.0180972	0.00345045	0.0566455	0.0690033	0.0807135	0.0739129	0.0973316	0.0298388	0.0221127	0.0368881	0.0589598	0.0682706	-0.0124599	0.01261
PAF1	grey	grey	0.0742537	0.0618248	0.046753	0.0607606	0.0274513	0.0459676	-0.00196248	0.0302618	0.0615824	0.00224405	-0.00612777	0.0558846	0.01671	0.0135177	0.0728428
ENSMFAG00000000629	grey	grey	0.098991	0.102477	0.0404976	0.0503043	0.0758166	0.0565856	-0.0125476	0.0777673	0.105853	-0.0393071	0.0190763	0.0954774	-0.0173396	-0.0309037	0.0645354
CCNH	grey	grey	0.0998605	0.0670623	0.043249	0.0946996	0.0244141	0.129941	0.037318	0.0617345	0.0482732	-0.0279327	-0.0384849	0.0511397	0.0564064	0.0113957	0.038658
OSBPL8	grey	grey	0.0259248	0.0115325	-0.0583848	0.0311348	0.0242537	0.0122749	-0.00588808	0.0155621	0.00294114	-0.0275032	0.0680596	0.0230436	0.0413425	0.05238	0.0251947
EIF2B5	grey	grey	0.0987162	0.0654639	0.0378573	0.0627257	0.0376828	0.0862924	0.0262238	0.0623081	0.0538688	-0.0104433	0.000357946	0.0558645	0.0230866	-0.00239842	0.0336511
GLOD4	grey	grey	0.102144	0.0809152	0.0587759	0.0617837	0.0536792	0.0476526	0.0172116	0.0520783	0.0614763	0.0253893	0.0033542	0.0498851	0.00499909	-0.00179623	0.0750932
GOLPH3	grey	grey	0.101844	0.0759689	0.0176265	0.0622489	0.0466162	0.0960659	-0.00358853	0.075208	0.0880086	-0.0381098	0.0290328	0.105477	0.0376798	-0.0162248	0.0523687
XPOT	grey	grey	0.0827188	0.0590927	0.0576413	0.0641457	0.052202	0.0571465	0.012911	0.0533544	0.0452274	0.0274559	0.00518411	0.0389615	0.0101589	-0.0294044	0.0336417
ADGRG1	grey	grey	0.0772648	0.0947039	0.0432219	0.0277735	0.0828525	-0.0276963	-0.00479875	0.0311349	0.0380222	0.0555671	0.00922748	-0.0322909	-0.00181417	0.0271355	0.113337
DHX40	grey	grey	0.0683821	0.0570969	0.0447063	0.0401501	0.0246499	0.0110725	0.0185009	0.0181671	0.0238958	0.044643	0.0031631	0.0076151	0.0113117	0.0223982	0.0610428
ANAPC5	grey	grey	0.100633	0.0834698	0.084117	0.0694787	0.0174755	0.0478354	0.00908198	0.0211109	0.0393848	0.0380128	-0.0571006	0.00330307	-0.00188665	-0.000568495	0.0744766
NUP88	grey	grey	0.0629923	0.0415636	0.0466646	0.0399447	0.0213588	0.0454593	-0.00128162	0.0494047	0.0489009	0.00529381	-0.0107682	0.0476857	-0.00831758	-0.0263346	0.0224335
CDC37	grey	grey	0.102399	0.0380744	0.0146902	0.0881472	0.0463136	0.140352	0.0623298	0.114212	0.0559631	-0.0081609	0.0120403	0.0956777	0.0717597	-0.00674342	0.0147901
SCAMP4	grey	grey	0.0690319	0.0663579	0.000170665	0.037147	0.0665397	0.0178273	0.0242106	0.0439489	0.0445351	-0.00597043	0.0327901	0.0194865	0.00630119	0.0113153	0.0605247
NEO1	grey	grey	0.0277896	0.0195525	0.00707208	0.0412339	0.0170089	-0.0345272	0.00429222	-0.0211654	-0.0140806	0.0363276	0.0162663	-0.0365208	0.0109489	0.0673354	0.0599402
NUMB	grey	grey	0.0709791	0.0672039	0.00472507	0.0158008	0.079466	0.0213418	-0.0278507	0.0578873	0.0897633	-0.0401235	0.0815715	0.0930729	0.0011871	-0.0259097	0.0410538
TSHZ1	grey	grey	0.0734252	0.0815443	-0.00912874	0.0498551	0.0614852	0.0206799	-0.00484647	0.017053	0.0319181	-0.0244152	0.0503096	-0.000594576	0.0366425	0.0694422	0.104542
SLC20A2	grey	grey	0.0136301	0.0061669	0.00423886	0.0114172	0.00903556	0.0073397	-0.0161027	0.000717863	0.0208836	-0.00670407	0.00800198	0.0399178	0.00242113	-0.00243325	-0.00868231
SLU7	grey	grey	0.0845261	0.0730178	0.02895	0.0634489	0.0466626	0.0312556	0.0107972	0.0368232	0.0593279	0.00612812	0.0129065	0.0394982	0.0115529	0.0139671	0.0776118
NUP153	grey	grey	0.0741017	0.0160846	0.069989	0.12587	-0.0422783	0.14304	0.0116448	0.0301769	0.0158063	0.0317516	-0.0540363	0.0581948	0.0718081	0.0112704	0.017758
ISOC1	grey	grey	0.0603929	0.0795559	0.00324473	0.00536987	0.107429	0.0118838	0.00482724	0.0557516	0.0657074	-0.0189201	0.0546656	0.0403718	0.00616498	-0.019282	0.0465564
NUBP1	grey	grey	0.0386092	0.0223953	-0.0159049	0.0117654	0.0352167	0.0205132	0.0295394	0.0154978	0.0141212	-0.007992	0.0260591	0.00669262	0.011501	0.0225449	0.0127651
KIAA2026	grey	grey	0.0498295	0.0264651	0.0012523	0.05482	0.0226115	0.0248502	-0.0188622	0.0130317	0.0140483	0.0049605	0.0484698	0.0309447	0.0356622	0.0386016	0.0442272
CCNG1	grey	grey	0.129257	0.116572	0.0877257	0.0406975	0.0731939	-0.00100492	0.0443269	0.0546327	0.0721221	0.0544748	0.00953232	0.0257381	-0.00400129	0.00727553	0.120076
WASHC5	grey	grey	0.0773952	0.0721243	0.033877	0.0506444	0.0782716	-0.00599151	0.00720551	0.0372097	0.0455788	0.0274327	0.0408957	0.00762366	0.0182532	0.0174576	0.090169
SKA2	grey	grey	0.113359	0.102211	0.0707427	0.0516142	0.0896857	0.00466359	0.0476081	0.0661306	0.0571539	0.06642	-0.0170957	-0.00229633	-0.0101511	-0.00784807	0.074604
USP28	grey	grey	0.0360235	0.0424221	0.0728395	0.031854	-0.0345901	-0.0280046	0.00525295	-0.0615093	-0.028606	0.0636232	-0.072041	-0.078843	0.00337677	0.0493427	0.081236
EXOSC10	grey	grey	0.0884813	0.0714609	0.0667576	0.0568096	0.037304	0.0482204	0.0134795	0.0496747	0.0518169	0.0371201	-0.0117022	0.0366789	-0.00470343	-0.0171673	0.0562492
ENSMFAG00000037151	grey	grey	0.063096	0.0385475	0.0314567	0.0554343	0.0239954	0.0249585	0.0212977	0.0268406	0.028713	0.0284468	-0.00644957	0.0270506	0.0291144	0.00265509	0.0355292
ICK	grey	grey	0.0387366	0.0437801	0.0130325	0.0160285	0.0318879	-0.0301515	0.0031998	-0.0314098	0.00226394	0.0300251	0.0180535	-0.0414285	-0.00578779	0.0388682	0.0715782
JMJD8	grey	grey	0.0753856	0.053634	0.0171642	0.0455931	0.0488586	0.0322792	0.0219342	0.034503	0.0324982	0.013124	0.0164386	0.0130474	0.0204808	0.0264034	0.0722743
STIM2	grey	grey	0.113013	0.078742	0.0543528	0.0741005	0.0595069	0.0458998	-0.00672395	0.0316208	0.0504207	0.0157042	0.0718756	0.0427105	0.0320159	0.0254579	0.111567
TMEM165	grey	grey	0.0901779	0.0640946	0.0504044	0.0631452	0.0407394	0.0905003	0.0112951	0.0666434	0.0577611	0.0224236	0.0115507	0.0748315	0.0608691	-0.0250085	0.0321092
L3MBTL3	grey	grey	0.0744623	0.0913592	0.102765	0.0185255	0.0552088	0.00240459	0.00765117	0.055105	0.0729361	0.0416478	-0.0383949	0.028512	-0.03191	-0.0617167	0.0632425
RAF1	grey	grey	0.0692395	0.0684303	0.0344259	0.0193539	0.0416	0.0525899	-0.0241755	0.0392853	0.0790562	-0.0164743	0.0049386	0.0758533	0.000184638	-0.0225483	0.040516
C11H12orf10	grey	grey	0.0471462	0.0499215	0.0332089	0.0257116	0.0512837	-0.00402217	0.0405592	0.0364846	0.0131673	0.039507	0.000594093	-0.0184387	0.0157285	0.0137699	0.0532264
NAA10	grey	grey	0.120458	0.0748144	0.0572251	0.0455848	0.117918	0.0509942	0.109626	0.12809	0.0543457	0.0628807	0.00885331	0.0230859	0.0224119	-0.0424508	0.0456686
LAPTM4B	grey	grey	0.0897058	0.0726468	0.0885942	0.0680602	0.016858	0.0359089	0.023535	-0.000552392	0.0158346	0.0838768	-0.0345235	-0.0218488	0.0247587	0.0406553	0.0848363
SQSTM1	grey	grey	0.070269	0.0159117	0.0645173	0.0772987	-0.0350798	0.0625616	-0.0173821	-0.0124942	0.0489846	0.0378082	0.0532288	0.120291	0.0594491	0.0733381	0.101427
CYP51A1	grey	grey	0.0727289	0.0664106	0.0358333	0.0423985	0.0723495	0.0372374	-0.000780465	0.0672609	0.0693535	-0.000388668	0.009088	0.0542161	-0.000909367	-0.03276	0.0305715
TEAD3	grey	grey	0.0868122	0.111953	0.00440138	0.0224948	0.0726977	0.0181537	-0.0580125	0.0422371	0.126786	-0.0809438	0.0581356	0.106635	-0.0089905	-0.0116421	0.096881
ENSMFAG00000031935	grey	grey	0.137959	0.116026	0.0539316	0.0714165	0.0863974	0.0767923	0.0418213	0.0804383	0.0882772	-0.00379756	0.000982021	0.0553178	0.0177424	-0.00579826	0.102612
SSBP1	grey	grey	0.154175	0.0954219	0.0714682	0.0880347	0.0999507	0.0837392	0.108787	0.120002	0.0535648	0.0553257	-0.00264217	0.0149358	0.0524539	0.0246857	0.0775826
CHPF	grey	grey	0.0880231	0.0461491	0.100815	0.0656088	0.0177117	0.00813508	0.0641717	0.0090911	-0.0189301	0.127766	-0.0463126	-0.054685	0.0318332	0.0532131	0.0799521
SLC25A28	grey	grey	0.0472162	0.0234923	-0.0557737	0.0497808	0.0323791	0.0264711	0.00527182	0.0133116	0.0105985	-0.0481906	0.0776245	0.0196247	0.0405578	0.0704927	0.0493436
MRPS35	grey	grey	0.0831071	0.0269158	0.0230758	0.0855016	0.0151222	0.131056	0.0668477	0.0617047	0.0215258	0.00357957	-0.0237327	0.0360621	0.0619287	-0.00899897	-0.0126881
THAP7	grey	grey	0.0857981	0.075939	0.0508419	0.0296042	0.0359585	0.0279799	0.0220521	0.0244798	0.0464064	0.00121535	-0.0257945	0.00762953	-0.0104039	0.00300395	0.0765034
FADS1	grey	grey	0.0774654	0.0244709	0.161316	0.0817706	-0.0305797	0.0431075	0.0582725	0.0206067	-0.0454381	0.181266	-0.108569	-0.0695287	0.0532917	0.00999378	0.0642023
TOR1A	grey	grey	0.0825915	0.066458	0.0493425	0.044705	0.0407538	0.0395174	0.00428479	0.0499642	0.0624029	0.0130262	-0.00443001	0.0535264	0.00448156	-0.00776775	0.0471957
EMC10	grey	grey	0.108635	0.077827	0.0579865	0.0599988	0.0632279	0.0430314	-0.00923777	0.0585571	0.0586306	0.0531999	0.0294097	0.0399068	0.0326614	-0.0116509	0.0757658
ANKS3	grey	grey	0.0543331	0.064188	0.0283602	0.0595244	0.00604473	0.00485319	-1.74872e-05	-0.0208829	0.00981957	0.0153495	-0.00524809	-0.0319373	0.00872321	0.059151	0.0791934
SUPT4H1	grey	grey	0.066442	0.0658413	-0.0112848	0.00524575	0.0910283	0.00509047	0.0137109	0.0750427	0.0740665	-0.0239098	0.0517221	0.0534159	-0.000178834	-0.00774296	0.0480076
REXO1	grey	grey	0.0292123	-0.0018479	-0.0148152	0.0424817	0.00289805	0.0608576	-0.00610055	0.0274767	0.00757059	-0.00509662	0.0260897	0.0371251	0.047501	0.0145625	0.0017689
KBTBD2	grey	grey	0.0467476	-0.00113186	0.0355704	0.0773132	-0.0280632	0.0845022	0.0275051	0.0338635	-0.00153278	0.0229822	-0.0246291	0.0349928	0.0701566	0.00717246	-0.000931545
ATF6	grey	grey	0.0760234	0.0761368	0.0367588	0.0256205	0.0391588	0.0539889	-0.0455755	0.053506	0.114646	-0.0456088	-0.000861409	0.119928	-0.0304866	-0.0573014	0.0285119
QSER1	grey	grey	0.0640044	0.0254677	0.0278396	0.0736248	0.000803198	0.0453497	0.0345314	0.0136609	-0.00559365	0.0273084	-0.00966203	0.0111131	0.0513252	0.0414343	0.0319888
EPHB6	grey	grey	0.0801913	0.0662642	0.048291	0.0757784	0.0126065	0.0227654	0.0626662	0.00299882	0.00649169	0.0398908	-0.0334925	-0.0403217	0.0221273	0.0682069	0.120907
UBE2Q1	grey	grey	0.09091	0.0925563	0.054685	0.0259432	0.0581678	0.0287028	-0.0283339	0.0320834	0.0849565	0.00287886	0.0219906	0.0562077	-0.00144867	-0.0363848	0.0715364
AGO2	grey	grey	0.0249706	-0.00567733	0.0372712	0.0502638	-0.0323179	0.0337428	-0.0154808	0.00633789	0.00309291	0.0467382	-0.011818	0.0326479	0.0494135	0.000144164	0.0142483
GNA11	grey	grey	0.103634	0.098398	0.0670632	0.0292531	0.0753755	0.0284087	-0.00518323	0.0509656	0.0853602	0.00664188	0.0202327	0.0565757	-0.0140946	-0.0395688	0.071093
DUSP16	grey	grey	0.0619112	0.101498	0.00135633	0.00864759	0.103111	-0.0406693	-0.0645518	0.00841626	0.0873815	-0.016472	0.103031	0.0447374	-0.00886734	-0.00148037	0.0977725
ZFC3H1	grey	grey	0.0586976	0.048419	0.0183062	0.0650293	0.0394926	0.0525485	-0.0109825	0.0504828	0.0517525	-0.010493	0.0313699	0.0654219	0.0504986	0.0100215	0.048432
TAF12	grey	grey	0.107885	0.0815225	0.0421999	0.0690484	0.0637896	0.0788167	0.0375288	0.0777899	0.0624981	-0.000906096	0.00779744	0.0539598	0.0293379	-0.00043106	0.0647097
NAA30	grey	grey	0.0812048	0.0713528	0.0548552	0.052445	0.0276135	0.0472255	0.00495989	0.0306756	0.0604618	0.00200503	-0.0054532	0.0478372	-0.0103448	-0.010345	0.0426859
H2AZ2	grey	grey	0.245899	0.176354	0.157219	0.139199	0.136281	0.118825	0.105894	0.167717	0.12808	0.0653627	-0.0245327	0.0667663	0.0408069	-0.0213385	0.159541
TGS1	grey	grey	0.0530319	0.00110478	0.0456172	0.0675009	-0.0452313	0.0915667	0.0223441	0.0137752	0.00288329	0.0396409	-0.0568712	0.028231	0.0398054	-0.000377628	-0.000502622
AZI2	grey	grey	0.104112	0.0905373	0.0833886	0.0582613	0.0350659	0.0396178	0.0133657	0.0257111	0.066097	0.0365167	-0.0238089	0.0393571	-0.00250149	-0.01116	0.0891249
TMEM70	grey	grey	0.115873	0.103272	0.0528377	0.0598135	0.07084	0.04942	0.0251734	0.0578049	0.0611288	0.0131466	0.0063031	0.00832417	0.0140248	0.0202653	0.100835
ENSMFAG00000000085	grey	grey	0.139862	-0.101327	0.292642	0.223882	-0.0868758	0.279934	0.186569	0.160277	-0.11942	0.362822	-0.131588	0.0284158	0.205904	-0.034979	-0.0995209
PSMB2	grey	grey	0.195811	0.148854	0.0777717	0.082809	0.165147	0.137201	0.0464044	0.198799	0.168755	-0.00453482	0.0509864	0.167484	0.016288	-0.0969812	0.0689586
PTK2B	grey	grey	-0.00281128	-0.0488107	-0.0102167	0.0453861	-0.0591839	0.112671	-0.0208788	0.0210319	-0.00193452	-0.0345331	0.00794443	0.0923766	0.0496694	0.00546784	-0.064623
NTHL1	grey	grey	0.0611413	0.0682587	0.031557	0.0445269	0.0391896	-0.00144978	0.0358887	0.00460988	0.0184326	0.0256207	-0.010138	-0.0297224	0.00460064	0.0458377	0.090205
RTN3	grey	grey	0.0935979	0.0974522	0.0324019	0.0315541	0.0696481	0.0244494	-0.0269775	0.0528834	0.120697	-0.0573195	0.0318619	0.101411	-0.0370571	-0.0299676	0.0695831
REST	grey	grey	0.0808898	0.0588363	0.0866148	0.0893895	0.00237673	0.0467761	0.011456	0.0114672	0.0220292	0.0478723	-0.0322269	0.0187127	0.037114	0.0241121	0.0736631
SLC39A1	grey	grey	0.15622	0.125071	0.0975225	0.0891571	0.0729846	0.0943594	0.0420279	0.0778844	0.0877006	0.0133514	-0.0218446	0.0531412	0.0118984	-0.0273658	0.0913257
NEDD4	grey	grey	0.0622379	-0.00413916	0.102718	0.0654296	-0.0419154	0.0690871	0.00466148	0.013707	-0.00113819	0.10001	-0.0606701	0.0353394	0.0375754	-0.0203158	-0.00377166
FOXJ3	grey	grey	0.063889	0.0169437	0.046562	0.0943938	-0.0149136	0.113301	-0.0113177	0.029158	0.0280114	0.0138188	-0.00660908	0.0821976	0.0647762	-0.0131331	0.0109965
ZFYVE16	grey	grey	0.054302	0.0493559	0.0468911	0.0218337	0.0373905	0.00916574	-0.0205694	0.0277189	0.0451979	0.0262386	0.0127868	0.0300332	-0.00965965	-0.00656649	0.0522596
LSM2	grey	grey	0.162865	0.10097	0.080806	0.0826921	0.110479	0.0815894	0.117079	0.129717	0.0575375	0.0655046	-0.0130525	0.0249089	0.0393076	-0.0113928	0.0634834
TLCD2	grey	grey	0.0804723	0.0444512	0.0336491	0.0984029	-0.00145204	0.150942	-0.0331765	0.0646837	0.0710781	-0.0300868	0.0240451	0.129406	0.0892364	-0.00864655	0.0474032
DENND2B	grey	grey	0.00973096	-0.0301133	0.026381	0.0551524	-0.0355431	0.0219054	0.0282886	-0.0191875	-0.0592732	0.0698061	-0.015201	-0.0410503	0.0466066	0.0518756	0.00188584
MRPL12	grey	grey	0.196172	0.12427	0.124809	0.131433	0.0737743	0.197642	0.111417	0.166185	0.102189	0.0266268	-0.065729	0.100096	0.0528603	-0.0588973	0.0643336
ENSMFAG00000033208	grey	grey	0.162403	0.160689	-0.00993499	0.0364363	0.178955	0.0687324	0.0101588	0.128184	0.186224	-0.115152	0.0707625	0.139202	-0.0244333	-0.0309542	0.0830367
VPS36	grey	grey	0.12165	0.12109	0.0696405	0.0581555	0.0725228	0.0237837	-0.0214657	0.0481164	0.0996527	-0.0126758	0.0363694	0.0615571	-0.00451655	-0.00690886	0.105935
CHD8	grey	grey	0.0582138	0.0561529	0.0438084	0.0551757	0.0130542	0.0312496	-0.0130881	0.00770419	0.0362676	0.0150932	-0.00921877	0.0208132	0.0147319	0.0149522	0.0567835
ZNF581	grey	grey	0.0478328	0.0147225	0.0368024	0.0117538	0.0218324	0.0373878	0.053488	0.0444147	0.0153186	0.0333471	-0.0184339	0.0185591	0.011295	-0.0451988	0.0034939
RASSF6	grey	grey	0.0964845	0.096467	0.263767	0.0683768	-0.0531087	-0.0191563	-0.0275195	-0.0777055	-0.00118852	0.196866	-0.136487	-0.0736391	-0.0349811	0.0117511	0.132541
SPIN1	grey	grey	0.0770329	0.071081	0.049619	0.0421691	0.0286864	0.00988724	0.0112045	0.0177088	0.0399135	0.0212491	-0.00279916	0.0093572	0.000974456	0.0108371	0.0869197
DERL1	grey	grey	0.103975	0.0797356	0.0500068	0.0370478	0.0728276	0.0911054	-0.0109898	0.107534	0.117494	-0.0376659	0.0244004	0.12909	-0.0123936	-0.0725956	0.0310219
IRF2BP2	grey	grey	0.0226603	0.004711	-0.0352855	0.0229311	0.0107238	-0.00220601	0.0282799	0.00674475	0.00537604	-0.00583928	0.0381259	0.0177548	0.039864	0.0735551	0.0472157
NUP58	grey	grey	0.0499647	0.0182612	0.0319773	0.0505875	-0.0147407	0.0713616	0.003513	0.0255028	0.0248499	0.000441853	-0.0252134	0.0469512	0.0208323	-0.0266048	0.0127991
NBN	grey	grey	0.0771766	0.0480515	0.024861	0.0502346	0.0494236	0.0610986	0.0313494	0.0658519	0.0413785	0.00921008	0.0163232	0.0429934	0.0305935	-0.00528042	0.0401526
YME1L1	grey	grey	0.108403	0.0957929	0.0604439	0.0620534	0.0572685	0.043184	0.00855585	0.0457707	0.0744778	0.00406973	-6.65924e-06	0.0530421	0.0115015	-0.00385344	0.0839587
MTDH	grey	grey	0.142159	0.070558	0.0235756	0.101	0.0774692	0.110496	0.0916456	0.118106	0.04825	0.033381	0.0180464	0.0492522	0.0758567	0.0275904	0.0780948
SLC39A7	grey	grey	0.106532	0.088287	0.0675038	0.051645	0.0603556	0.013388	-0.00807135	0.0347587	0.0536072	0.0673699	0.0281464	0.0140976	0.00566718	0.0209855	0.092167
ENSMFAG00000039937	grey	grey	0.160797	0.122006	0.205926	0.119046	-0.00234918	0.0827818	0.0846975	0.0335934	0.03343	0.138555	-0.136188	-0.0359185	0.0261324	0.0213169	0.128684
FHL2	grey	grey	0.180468	0.0110107	0.21213	0.116572	0.0424244	0.260101	0.124555	0.226564	0.0686745	0.225576	-0.0621585	0.18374	0.135237	-0.145884	-0.0392964
CPLANE1	grey	grey	0.0519732	0.0312202	0.049434	0.0562626	0.00681279	-0.00718978	0.0363199	-0.00554137	-0.0198118	0.0697535	-0.0243679	-0.0544415	0.0248385	0.0580265	0.0763077
CWC22	grey	grey	0.0892665	0.0490058	0.0502125	0.089654	0.0161823	0.0898515	0.00564416	0.048338	0.0546723	0.00331676	-0.000201621	0.0776645	0.0365723	-0.0066093	0.0407586
HSPA4	grey	grey	0.173508	0.118754	0.127157	0.119071	0.0714374	0.148035	0.0324611	0.116408	0.109968	0.065249	-0.0378468	0.105378	0.0359541	-0.0700146	0.0749239
NME7	grey	grey	0.0429321	0.0221576	0.0232451	0.00267177	0.0499297	-0.00323998	0.0518827	0.056043	0.0111612	0.0631328	0.0283526	0.00488459	0.0246479	0.00408409	0.0300179
KIFC3	grey	grey	0.0211581	0.0350419	0.0392501	-0.010046	0.0482149	0.0399434	-0.087633	0.0583104	0.107917	0.00982672	0.0364331	0.153199	-0.0155545	-0.107881	-0.0143038
C1orf52	grey	grey	0.0611066	0.0260789	0.0341621	0.0574162	-0.0106971	0.0810284	0.0213022	0.0416295	0.0284553	0.00969693	-0.0305197	0.0516697	0.0334645	-0.00669769	0.00674557
GRHL2	grey	grey	0.089936	0.114334	0.0669347	0.0541222	0.0656725	-0.0150681	-0.025766	0.0108112	0.0594211	0.0295113	0.01349	-0.00336096	-0.0263392	0.0176281	0.118201
YDJC	grey	grey	0.0731756	0.0554669	0.0398916	0.0620451	0.0304723	0.0379203	0.0424954	0.032093	0.00940761	0.0238072	-0.0274527	-0.0309156	0.0165968	0.0286307	0.0725513
MRPL9	grey	grey	0.12132	0.0849647	-0.00708406	0.0559211	0.131518	0.064901	0.0938742	0.126298	0.0723667	-0.0126077	0.0652914	0.0609902	0.0386921	0.0029687	0.0490785
ATP9B	grey	grey	0.0539222	0.0554366	0.0315888	0.0443019	0.0171776	0.0357713	-0.0137378	0.0140265	0.0315435	-0.00873576	-0.00153187	0.0187128	-0.000361564	0.00323487	0.0526039
WWC1	grey	grey	0.0769352	0.0921839	0.00129079	0.0114215	0.107943	0.0255244	-0.0572113	0.0526676	0.111101	-0.0460662	0.0921732	0.0902904	-0.00207916	-0.0470095	0.0541996
NME4	grey	grey	0.11419	0.109411	0.0144992	0.0464435	0.127759	0.0166919	0.110562	0.0849875	0.0488986	0.0308903	0.0330792	-0.00845924	0.0317381	0.046337	0.10773
ENSMFAG00000035568	grey	grey	0.0962038	0.105486	0.0495394	0.0257804	0.0801138	0.031862	-0.00576089	0.0499484	0.0912787	-0.0131708	0.0181879	0.0591737	-0.0123625	-0.0305821	0.0686438
FUNDC1	grey	grey	0.0622543	0.0560794	0.0382709	0.0396375	0.0443652	0.00325072	0.0211176	0.0271126	0.0211987	0.0411153	0.0163059	-0.0118367	0.0147769	0.0301943	0.0624999
YKT6	grey	grey	0.037685	0.00589579	0.00896483	0.014716	0.03762	0.036098	-0.00276155	0.0541954	0.0362702	0.0132898	0.0195122	0.0594683	0.0139572	-0.0506662	-0.0232383
SEPTIN7	grey	grey	0.134827	0.0810342	0.0574761	0.0996017	0.0601746	0.106156	0.0542395	0.0895478	0.0587155	0.0380133	-0.0177781	0.0609092	0.0579646	0.0163989	0.0615581
MAP3K4	grey	grey	0.0744105	0.0832756	0.00397088	0.0402645	0.0614	0.00503698	-0.0219216	0.00806982	0.0512759	-0.0147703	0.0269484	0.0103611	-0.00541596	0.03128	0.0820574
ENSMFAG00000030929	grey	grey	0.117428	0.120894	0.0676282	0.053669	0.0858817	0.0293806	0.00693556	0.0585174	0.0915093	0.0120057	0.020862	0.0458139	-0.00411297	-0.00137234	0.115908
ENSMFAG00000031015	grey	grey	0.0405041	0.0242957	-0.0181414	0.0397243	0.0231424	0.0595092	-0.028194	0.0407269	0.0539929	-0.0459547	0.0512057	0.0871938	0.0229954	-0.000268483	0.00527527
GRSF1	grey	grey	0.0961671	0.0582911	0.0589015	0.0774258	0.0336856	0.0706904	0.0458393	0.0644364	0.025213	0.05105	-0.0105419	0.0135552	0.0348922	0.000551441	0.0539732
TXLNG	grey	grey	0.0246141	-0.0319369	0.000522299	0.0893324	-0.0732291	0.0990906	0.0313758	-0.00920135	-0.0376434	0.00570703	-0.0407895	0.00225084	0.0752781	0.0548332	0.000257699
SAYSD1	grey	grey	0.0932423	0.0981678	0.0240307	0.0361488	0.0848734	0.0146289	-0.0113233	0.0518913	0.0826476	-0.0243668	0.0409924	0.0541177	-0.0132529	0.00322857	0.0807307
FASN	grey	grey	0.104015	0.101604	0.0864924	0.0528437	0.0867358	0.072297	0.0114464	0.0907893	0.0965831	0.00057598	-0.0316154	0.0689058	-0.00259803	-0.0639641	0.0455144
STAM	grey	grey	0.0640124	0.0572087	0.0528751	0.0259197	0.03955	0.00986934	-0.000825732	0.030756	0.0403103	0.0237955	-0.00141788	0.0217955	-0.00487094	0.00266065	0.0357378
BBS5	grey	grey	0.084909	0.0228583	0.0308524	0.0676502	0.0252129	0.105605	0.0591261	0.0740224	0.0154118	0.0221178	-0.031066	0.029703	0.0540589	0.00392077	0.00667541
MRPL32	grey	grey	0.109943	0.0354335	0.0469652	0.092117	0.0374387	0.133204	0.0817465	0.105712	0.0518461	0.00310458	-0.0183121	0.0827702	0.04734	-0.0188398	0.0083926
TMCO1	grey	grey	0.111605	0.105555	0.0424047	0.0482829	0.0813944	0.0361061	-0.00255439	0.0701133	0.0934055	-0.0236464	0.0397746	0.0603476	-0.0187196	0.000417674	0.0811433
HIGD2A	grey	grey	0.118707	0.110431	0.0268688	0.0487028	0.118352	0.0329491	0.0706653	0.11223	0.0910821	0.00431787	0.050723	0.0682242	0.0154981	-0.00215118	0.0970178
C2orf49	grey	grey	0.0655998	0.0543792	0.0186945	0.0360415	0.0389021	0.0402857	0.0171246	0.0389523	0.0465388	-0.0018489	0.00232524	0.0320624	0.00800843	0.0142767	0.0473246
MFAP3	grey	grey	0.0812977	0.0748781	0.0444043	0.040318	0.0448913	0.0307576	-0.000922212	0.0247505	0.0607595	0.00830326	0.00958537	0.0373633	0.000727272	-0.0156657	0.0567357
MIPEP	grey	grey	0.0654783	0.060902	0.058861	0.0560364	0.0292556	0.00810479	0.0117593	0.0219335	0.024266	0.0371944	-0.0164394	-0.00652341	-0.00208532	0.0121157	0.0675539
ZNF414	grey	grey	0.0408918	0.0194105	-0.0103359	0.0351914	0.0319173	0.0162101	0.0314973	0.0128438	0.000136816	-0.00416617	0.0174804	-0.0155797	0.00899552	0.0342149	0.0163941
ICA1	grey	grey	0.0376297	0.0562904	-0.0275209	0.0194957	0.0570388	-0.0174853	-0.0297876	-0.00468344	0.0415195	-0.0469146	0.0694035	0.0146713	-0.000587178	0.0368207	0.077718
SF3B3	grey	grey	0.0990376	0.0715374	0.08954	0.0792671	0.0308501	0.0695894	0.0293095	0.0483284	0.0363373	0.0481226	-0.044828	0.00976261	0.0323022	-0.00218758	0.0669697
DCAF5	grey	grey	0.116761	0.110839	0.0872885	0.0850089	0.0336839	0.0292552	-0.00912355	0.0122651	0.0641405	0.0317706	-0.014761	0.0273122	0.00608602	0.0202319	0.124651
CREBZF	grey	grey	0.0655011	0.0416538	0.0445596	0.0548485	-0.00459778	0.0496875	-0.0154928	0.015262	0.032367	0.00208811	-0.0130046	0.0245403	0.00289415	0.0128612	0.0427225
DTD2	grey	grey	0.0705398	0.0817892	0.0317997	0.0359556	0.0647714	0.00258341	0.0141374	0.0442775	0.0392122	0.0307348	0.013916	-0.00861737	-0.0108121	0.0149777	0.0720295
DCAF1	grey	grey	0.0554733	0.0209642	0.0214504	0.0536556	-0.00677051	0.0857127	-0.00418378	0.0238349	0.0409564	-0.0121817	-0.0146509	0.0667518	0.0162857	-0.00448926	0.0194074
ALG2	grey	grey	0.0541189	0.0426267	-0.00453248	0.0334598	0.0589782	0.0515177	0.0109613	0.060261	0.0426678	-0.0230203	0.0364262	0.0497717	0.0125372	-0.0115776	0.0151524
TRAF7	grey	grey	0.0835181	0.0614613	0.0375279	0.0377489	0.0770738	0.020891	0.0398463	0.0720234	0.0454486	0.0466711	0.023285	0.0256335	0.0228866	-0.019785	0.0549711
KANSL1	grey	grey	0.0842276	0.0789947	0.0630426	0.0571002	0.0295631	-0.00642667	0.00323342	-0.00226464	0.0375292	0.0405933	-0.00554918	-0.00367135	-0.000473202	0.0280108	0.10848
IQGAP1	grey	grey	0.211803	0.170594	0.142626	0.124717	0.135921	0.0611037	0.0292435	0.123549	0.148062	0.0706534	0.0239957	0.100148	-0.00738501	-0.0213058	0.168231
SMAP1	grey	grey	0.113181	0.0839837	0.0490943	0.0267751	0.128211	0.0463966	0.0386117	0.134661	0.105435	0.0164328	0.0564231	0.102158	-0.00307472	-0.0683821	0.0481709
SURF4	grey	grey	0.137474	0.0557118	0.0601799	0.101597	0.0613641	0.131854	0.0621348	0.114151	0.0580435	0.0542126	0.00358965	0.078938	0.0792444	-0.013419	0.0375845
SEC24A	grey	grey	0.0566992	0.031613	0.0341069	0.0267944	0.0499726	0.070447	-0.0134884	0.07576	0.0822232	0.0105991	0.0410206	0.131333	0.0258763	-0.0629593	-0.00248535
CCDC6	grey	grey	0.0708792	0.0777943	-0.0494724	0.0244458	0.116626	-0.0309762	0.0105319	0.0554441	0.0626172	-0.041142	0.115264	0.0207672	0.00279349	0.0561034	0.0798346
ADAR	grey	grey	0.141021	0.145661	0.0656199	0.0364117	0.132868	0.0208898	-0.0171983	0.0748183	0.138023	-0.00208481	0.0433123	0.0823302	-0.026963	-0.0528978	0.103674
MRPL3	grey	grey	0.0928946	0.0656045	0.0136896	0.0585284	0.0656209	0.0704551	0.0439671	0.0749753	0.055681	-0.00777697	0.00691656	0.0525537	0.0236532	-0.000867853	0.0472532
PITPNM1	grey	grey	0.0603675	0.0374211	0.0427451	0.0358466	0.0259425	0.0519679	-0.0145772	0.0396423	0.0521984	0.0089688	0.0116083	0.0646374	0.00934611	-0.0383059	0.0119146
PDZD8	grey	grey	0.0586395	0.0209749	0.00506545	0.0583655	0.00537507	0.05713	0.00406812	0.0189154	0.0270228	-0.0117608	0.037	0.051518	0.0405879	0.037108	0.029842
ICE1	grey	grey	0.0575333	0.0215189	0.0493992	0.0548846	-0.017758	0.062279	0.0176143	0.0108011	0.004068	0.0324498	-0.033454	0.00772686	0.0314555	0.015272	0.0210526
RYBP	grey	grey	0.0505255	0.0197087	0.0569083	0.0526881	0.00421113	0.0480251	0.0254945	0.0411123	0.0146459	0.0552935	-0.0131176	0.0218257	0.0415522	0.0185932	0.0367742
TOPORS	grey	grey	0.111695	0.104697	0.0937083	0.0989974	0.0093172	0.0541698	-0.00813081	-0.00313387	0.0652801	0.0186863	-0.0437974	0.0252734	0.00147887	0.0174822	0.118114
CUEDC2	grey	grey	0.100955	0.0818271	0.0692361	0.057965	0.0353111	0.00748407	0.0610527	0.0180961	0.0159586	0.0648378	-0.0159181	-0.0336506	0.0136833	0.0552043	0.110126
PCNP	grey	grey	0.100575	0.0785364	0.0401232	0.0611991	0.043547	0.0669183	0.0230043	0.0570807	0.0762109	0.00689086	-0.0100577	0.0618054	0.0163725	-0.0137653	0.0511217
SCO1	grey	grey	0.102844	0.0781697	0.0409564	0.0417479	0.0501487	0.0872848	0.0219768	0.0623389	0.0819981	-0.0143547	-0.00683926	0.0734363	0.0193325	-0.0302891	0.0409839
RNF103	grey	grey	0.0568028	0.0341216	0.0107727	0.0384649	0.0158698	0.0314209	0.0035059	0.0241105	0.0328701	0.00412595	0.034511	0.042532	0.0233541	0.0241261	0.0512545
ENSMFAG00000033676	grey	grey	0.0402796	0.0119256	0.0689312	0.053673	-0.0503409	0.00301343	0.0740438	-0.0386904	-0.055783	0.0863146	-0.084319	-0.0909511	0.00669156	0.087035	0.0485678
MDM4	grey	grey	0.0587786	0.0329618	0.0278439	0.062915	0.00921377	0.0532472	-0.0186941	0.0295594	0.0370533	-0.0168103	0.00561235	0.0371728	0.0206506	0.00239285	0.038009
ASCC2	grey	grey	0.0948405	0.0919782	0.0189113	0.0282342	0.109952	0.0359054	-0.0178153	0.0853748	0.10282	-0.026006	0.0843032	0.0950454	0.00102769	-0.0150723	0.0623074
ODR4	grey	grey	0.0780712	0.0627739	0.0577847	0.0523156	0.0127105	0.0478062	0.0174729	0.02905	0.040457	0.019217	-0.0247441	0.0225875	0.0174135	0.00201115	0.0679029
UBP1	grey	grey	0.11404	0.0962151	0.0819633	0.0831098	0.0316483	0.0851106	0.0267998	0.0593474	0.0654132	0.0265046	-0.022236	0.0523993	0.0315675	-0.0157342	0.0793501
HECTD1	grey	grey	0.124254	0.110326	0.0326145	0.070322	0.104181	0.0554864	-0.0247541	0.0822153	0.111202	-0.0210702	0.0877736	0.105757	0.00138166	-0.0272927	0.0923807
ID1	grey	grey	0.170635	0.210618	-0.0554767	0.0891121	0.173262	0.0448814	0.0696969	0.114926	0.147946	-0.157323	0.071599	0.0483217	0.020339	0.12801	0.226701
ABCD3	grey	grey	0.080529	0.0805231	0.0285337	0.0264038	0.0517247	0.014631	-0.035898	0.0317756	0.0637831	-0.00364605	0.0550968	0.0561302	0.00103008	0.00891573	0.0752302
PITPNA	grey	grey	0.06848	0.0602976	0.00849022	0.015198	0.0832429	0.0196542	-0.00511938	0.0491096	0.0638714	-0.0100167	0.0853397	0.0597071	0.0158334	0.00126094	0.041925
WDR75	grey	grey	0.045369	-0.00345797	0.00150147	0.0807422	-0.0201911	0.0962245	0.0282794	0.0346985	-0.00602614	-0.0105005	-0.0211104	0.024236	0.0436683	0.0175121	-0.0148347
ENSMFAG00000034144	grey	grey	0.0851061	0.063748	0.0312474	0.0512591	0.0420833	0.0624675	0.025415	0.0577594	0.0605142	-0.00974208	-0.00454653	0.0391726	0.0188179	-0.00770593	0.0505351
GMPS	grey	grey	0.136282	0.1214	0.108583	0.102184	0.0592881	0.112022	0.0217974	0.0699453	0.0856065	0.0249629	-0.0454418	0.0554459	0.0213552	-0.028951	0.091816
RNF38	grey	grey	0.0862952	0.0969373	0.0514336	0.0468841	0.0335873	-0.00418448	-0.0190699	0.00150161	0.0525086	0.00992431	-0.0138172	-0.00111421	0.00240974	0.035672	0.105937
ENSMFAG00000040662	grey	grey	0.122684	0.0978814	0.12035	0.0895481	0.0504712	0.108206	-0.0193797	0.0934518	0.1028	0.0423739	-0.0241822	0.107119	0.0168364	-0.0804115	0.0466284
SVBP	grey	grey	0.0546266	0.0317478	0.0202996	0.016003	0.0545725	0.0103405	0.0446002	0.0482278	0.0180988	0.0397602	0.0114763	0.00207873	0.0225694	-0.00125747	0.0295522
TIMM29	grey	grey	0.0514877	0.0544869	0.0159952	0.0368251	0.0368003	-0.00553682	0.0163295	-0.000428221	0.0236356	0.0111933	0.00793603	-0.00929434	0.0104716	0.054086	0.0718777
MARS1	grey	grey	0.0869996	0.0577805	0.0469517	0.0673578	0.0151125	0.0793243	0.0174996	0.0356715	0.0390574	-0.000833228	-0.0381047	0.0266865	0.0189525	-0.00451092	0.0414287
SCAPER	grey	grey	0.0139382	0.0157887	0.0051126	0.0314211	-0.0179757	-0.0188232	-0.00745384	-0.052112	-0.0114605	-0.00768653	-0.00596549	-0.0327041	0.0181535	0.0623677	0.0490586
TOX4	grey	grey	0.0943558	0.0590656	0.0157796	0.0486268	0.0696011	0.0739695	0.0271737	0.0912314	0.0864968	-0.0289232	0.0296268	0.10818	0.0251669	-0.0208967	0.0296056
EPC2	grey	grey	0.059363	0.0428998	0.0155396	0.0510713	0.0206047	0.0182232	0.0188359	0.00130146	0.024815	0.00352	0.0221881	0.0188388	0.027399	0.0416733	0.0533391
FKBP8	grey	grey	0.139861	0.129802	0.0614307	0.0597634	0.137986	0.0264038	0.093505	0.10679	0.0765413	0.0384377	0.0103998	0.0100003	-0.001636	0.0141318	0.108548
CERT1	grey	grey	0.071214	0.0585975	0.00232172	0.0485491	0.0464185	0.019433	-0.0263848	0.0216647	0.0568938	-0.0216871	0.0677752	0.0581777	0.00623603	0.0337739	0.0567031
USP7	grey	grey	0.118839	0.104761	0.0590413	0.100446	0.0449745	0.0988322	-0.0341599	0.0477546	0.0813076	-0.0111806	0.00482798	0.0806433	0.0340171	-0.022308	0.0792929
IDH3G	grey	grey	0.0819454	0.068414	0.0089593	0.0255377	0.0942276	-0.00332517	0.0539104	0.0591163	0.0417014	0.00309491	0.0445114	0.0082638	0.000853304	0.0318628	0.0727633
ANGPTL4	grey	grey	0.127483	0.157715	-0.0996161	0.0276837	0.189133	-0.0127689	-0.0932494	0.0675715	0.179271	-0.161143	0.277369	0.155708	0.000575881	0.0730188	0.176737
ENSMFAG00000033682	grey	grey	0.087108	0.0576801	0.0408959	0.0942873	0.0104455	0.091719	0.014013	0.0460193	0.0344128	0.0015032	-0.017572	0.0273197	0.0514536	0.0113501	0.0682312
ATP13A2	grey	grey	0.069515	0.0709545	0.0141341	0.00836999	0.0993679	-0.0134571	-0.0147579	0.0404248	0.0536755	0.0256747	0.0675162	0.0236479	0.00780946	-0.00397715	0.0731975
LAMB3	grey	grey	0.02639	-0.035668	0.0968052	0.0910631	-0.0765657	0.0546156	0.0478133	-0.00661763	-0.0749976	0.160673	-0.0688183	-0.0408175	0.0934479	0.0502991	0.0228779
CDK13	grey	grey	0.108334	0.101747	0.0501003	0.0742178	0.0531237	0.0446131	-0.0318004	0.0256405	0.0825201	-0.00859199	0.0421708	0.0695841	0.0222285	0.0256556	0.122212
MIS18A	grey	grey	0.0832315	0.0701666	0.0342689	0.0675408	0.0419138	0.00153291	0.0537429	0.0153558	0.00544148	0.0220989	-0.0233478	-0.0394982	0.0106603	0.0605463	0.0758384
FANCC	grey	grey	0.0497082	0.0479988	0.0572919	0.0476549	0.00331164	-0.00461068	-0.00458749	-0.0144353	0.00889409	0.0486501	-0.0267271	-0.0224269	0.00193131	0.0247546	0.0741022
MIB2	grey	grey	0.0709669	0.0878067	0.0481091	0.0178569	0.0485339	0.0054848	-0.00963706	0.0214668	0.0553244	0.0063648	-0.00770977	-0.000941022	-0.0138493	0.000769255	0.0934
PSMA1	grey	grey	0.141098	0.0753284	0.04178	0.0850756	0.0988465	0.135284	0.0717627	0.153739	0.0930035	-0.00980731	0.0374901	0.121089	0.0492523	-0.0519582	0.0296057
EIF2B1	grey	grey	0.0950779	0.064403	0.00482218	0.0726912	0.0472916	0.0746448	0.0593542	0.0619116	0.0402223	-0.0238503	0.0120418	0.0333532	0.0335076	0.0373159	0.0523424
MAP2K4	grey	grey	0.0711751	0.0762325	0.0639888	0.0547184	0.0137524	0.0365867	-0.0550092	-0.00171081	0.0712074	-0.00606494	-0.0079673	0.0561111	-0.0171946	-0.00923996	0.0716653
TMEM205	grey	grey	0.0884923	0.0747748	0.0426365	0.0611575	0.0335462	0.0221274	0.0363505	0.0153996	0.0313905	0.0185257	0.0100897	-0.00490008	0.0135065	0.0716884	0.0995105
HADH	grey	grey	0.0974566	0.0729212	0.0113396	0.047766	0.0753462	0.0130511	0.026108	0.0510846	0.0472879	0.0152057	0.0572229	0.0217418	0.0166552	0.0295202	0.0865076
BORCS6	grey	grey	0.0787107	0.10987	-0.00215035	0.0313228	0.0899172	-0.0133402	0.00689343	0.0215619	0.0638335	-0.0450105	0.0439148	6.28474e-05	-0.0193565	0.0512796	0.114694
RBBP7	grey	grey	0.132153	0.0811965	0.0737505	0.119993	0.0185422	0.0865434	0.0329644	0.031375	0.0204317	0.048913	-0.0388018	0.00303127	0.0460531	0.0697936	0.0955633
ELK3	grey	grey	-0.00568737	-0.0557335	-0.0620177	-0.0117628	0.0356863	0.0706672	0.00198078	0.0743699	0.0267696	-0.000122813	0.106325	0.13802	0.0716716	-0.037318	-0.0851495
YTHDC1	grey	grey	0.11296	0.101287	0.0758803	0.0893732	0.0310502	0.0717159	-0.0138285	0.0460968	0.11008	-0.0189077	0.00425517	0.11596	0.0099276	-0.00342459	0.109154
RBM43	grey	grey	0.0364669	0.0334039	-0.0100586	0.0275359	0.0251824	-0.0357192	0.0367569	-0.00843597	-0.0152662	0.0264371	0.0178623	-0.0540649	0.00524133	0.0807268	0.0624298
CAPRIN2	grey	grey	0.0317177	-0.00294284	0.0203238	0.0683595	-0.0296728	0.0384307	0.00547709	-0.0310809	-0.0341927	0.0448416	-0.0180415	-0.026238	0.0458593	0.0645064	0.0208489
USP42	grey	grey	0.0573062	0.026311	0.0552296	0.0682391	-0.0160665	0.0550999	-0.01023	0.00942562	0.0255746	0.0259457	-0.0192355	0.0412822	0.0309205	-0.00500863	0.0348718
RHBDD2	grey	grey	0.087249	0.0788534	0.0383026	0.0352949	0.0674062	0.0279126	0.00253818	0.0412504	0.0522345	0.0316862	0.0394969	0.0261914	0.0194031	0.0188079	0.0866705
PDGFA	grey	grey	0.0511575	0.00687912	0.119291	0.0600748	-0.0413411	0.0158868	0.0315589	-0.0286283	-0.0371013	0.154281	-0.0731355	-0.0456711	0.0309827	0.0368876	0.0480322
C9orf78	grey	grey	0.143	0.163212	0.0465768	0.0582553	0.105901	0.00764803	0.0160604	0.039578	0.115692	-0.0385342	0.0241061	0.0299411	-0.0207308	0.0379341	0.155617
CD164	grey	grey	0.119754	0.0982217	0.0128827	0.0319616	0.146469	0.0392641	-0.0501543	0.114553	0.139174	0.00618982	0.146584	0.16455	0.0174388	-0.052678	0.0463096
AURKAIP1	grey	grey	0.184268	0.166382	0.0875564	0.0838313	0.163472	0.0751444	0.0695308	0.141379	0.126621	0.0161365	0.0167127	0.0723239	0.0121905	-0.0338332	0.117207
ENSMFAG00000030694	grey	grey	0.0496243	-0.00283655	0.0316347	0.0589533	0.00975823	0.0699991	0.060964	0.0519072	-0.00410089	0.0565406	-0.00420834	0.021964	0.0616924	0.00329262	-0.00611404
YY1	grey	grey	0.152388	0.144813	0.0633154	0.0667954	0.102708	0.0606118	0.00960398	0.0963608	0.136792	-0.0160934	0.0278656	0.10343	-0.00130971	-0.0228614	0.121058
POLE4	grey	grey	0.147245	0.110608	0.037647	0.0569897	0.162158	0.0555785	0.110996	0.157923	0.082231	0.0382677	0.0432057	0.0462239	0.031614	-0.00910599	0.071033
KHDRBS1	grey	grey	0.140117	0.0817065	0.0507282	0.105055	0.0533101	0.122888	0.0550338	0.0905377	0.0658892	0.0199148	-0.00833393	0.0734168	0.06331	0.0288069	0.0793841
FAT1	grey	grey	0.142013	0.0881778	0.184052	0.107	0.0329159	0.0736011	0.0440922	0.0670354	0.0338571	0.171377	-0.0663532	0.00716247	0.0461599	-0.025147	0.0882832
NEK1	grey	grey	0.0467746	0.0113078	0.00130889	0.0518848	0.0255356	0.017658	0.0301788	0.0391898	-0.00846128	0.0418303	0.0407113	0.00285886	0.0569993	0.0354644	0.0358693
ENSMFAG00000000169	grey	grey	0.110727	0.112125	0.0108838	0.0313523	0.132559	0.027238	-0.00425445	0.0958514	0.106206	-0.029375	0.0707159	0.0679228	-0.000150396	-0.0223453	0.0920269
APMAP	grey	grey	0.123422	0.115935	0.0477199	0.0871253	0.0800582	0.0280544	0.0169184	0.0413529	0.0508571	0.0356307	0.0105797	-0.00500221	0.0217529	0.0621306	0.12515
SEC61A1	grey	grey	0.0897877	0.0496996	0.0352241	0.0587123	0.0670821	0.0660332	0.0187772	0.0722404	0.0502511	0.039771	0.0247605	0.0635164	0.0411897	-0.0310966	0.00712997
VPS8	grey	grey	0.0676253	0.0620357	0.0606605	0.0426782	0.0393029	0.00133422	0.00592927	0.0200812	0.0319672	0.0392876	-0.00223877	-0.0020641	-0.00849623	0.012691	0.0615028
ENSMFAG00000036456	grey	grey	0.180083	0.182698	0.0970921	0.0417187	0.178569	0.00464571	-0.029738	0.107293	0.168224	0.039493	0.114172	0.116113	-0.0134116	-0.0297355	0.152128
PGAP2	grey	grey	0.0683845	0.0941949	0.0382529	0.00897747	0.0886642	-0.0318893	0.0161992	0.0359628	0.0565404	0.0188716	0.0179099	0.00190954	-0.0143183	-0.000819339	0.071179
TMEM248	grey	grey	0.09301	0.0856331	0.0511054	0.0533579	0.038142	0.0212628	0.00793071	0.0198513	0.0553468	0.00438141	0.00546324	0.0262297	0.00592889	0.0238701	0.0826098
EYA2	grey	grey	0.00574583	0.0165135	-0.138095	-0.0286642	0.120963	-0.0769804	-0.0217405	0.00981468	0.023034	-0.0488933	0.221578	0.0231483	0.0277751	0.0814079	0.0452947
BRWD1	grey	grey	0.103337	0.0767334	0.0622084	0.0750003	0.0165193	0.0732419	-0.0116755	0.0210715	0.0464569	0.0124459	-0.014329	0.0275337	0.041687	1.23758e-05	0.0688732
MRPS33	grey	grey	0.166854	0.112085	0.086262	0.0730912	0.105023	0.0862403	0.0789441	0.139382	0.106533	0.0238377	-0.00457805	0.0844366	0.0108177	-0.024216	0.0872453
PQBP1	grey	grey	0.0572301	0.0461053	0.0228026	0.0266794	0.0240286	0.0413542	0.0112963	0.0454921	0.0489177	-0.0232643	-0.00907657	0.044164	-0.0155887	0.00240541	0.0286234
AIM2	grey	grey	0.0653961	0.0435078	0.0637282	0.0216147	0.0366543	0.0273596	0.0551318	0.0521439	0.0347281	0.0384297	-0.0464322	0.016069	-0.0164614	-0.0207987	0.0210741
FAIM	grey	grey	0.0495443	0.0424857	0.0402405	0.0195367	0.0521507	-0.0154407	0.058477	0.0311092	0.000107577	0.0597916	-0.00909067	-0.0374264	-0.00304631	0.0177374	0.0581339
ITPR2	grey	grey	0.0570398	-0.00547135	0.0389876	0.0854917	-0.0139858	0.0470609	0.0408034	0.0168143	-0.0269259	0.0788523	-0.0199384	-0.00788113	0.0542202	0.0456315	0.00306511
MYC	grey	grey	0.0877638	0.0443059	0.0184452	0.179689	-0.0631978	0.147507	0.131301	0.0205274	-0.0124917	-0.0320162	-0.0901375	0.00528568	0.114753	0.133516	0.122042
PLPP5	grey	grey	0.031009	0.00148756	0.00783928	0.032022	0.0060775	0.0527409	-0.00562039	0.0338973	0.0174705	0.0219412	0.0115335	0.052588	0.0439515	-0.0149904	-0.00895295
OLFML2A	grey	grey	0.0159415	-0.000923608	-0.0163708	0.0114524	0.0424301	-0.0518306	0.0500838	0.00485765	-0.0380805	0.0898104	0.0424794	-0.0522953	0.0408708	0.0706418	0.0485187
PSMC2	grey	grey	0.132219	0.0992351	0.0675016	0.0585634	0.10342	0.0836465	0.0459441	0.115186	0.0819747	0.0277773	-0.00206188	0.0595332	0.0172723	-0.0338167	0.0586452
COPZ2	grey	grey	0.0652564	0.00920091	0.0567008	0.0479774	0.0340156	0.00960621	0.147069	0.0560792	-0.0537077	0.133752	-0.0176743	-0.0700509	0.0744989	0.0700043	0.0598606
PRKX	grey	grey	0.0546927	0.00637589	-0.063196	0.0527903	0.0538824	0.0496716	0.0544937	0.04548	0.00152951	0.000878905	0.08964	0.0308978	0.0775535	0.0482643	0.0204851
ARFRP1	grey	grey	0.127274	0.114071	0.0524342	0.0511271	0.108801	0.0768059	0.0227159	0.0972861	0.103206	-0.00841923	0.0137033	0.0746575	0.00895184	-0.0459551	0.0635497
STX18	grey	grey	0.0978556	0.101532	0.0199971	0.0319865	0.0907303	0.0364219	0.00705085	0.0626124	0.0833445	-0.0252475	0.0408702	0.0555671	0.0117069	-0.00599607	0.0766239
NSMCE4A	grey	grey	0.0548596	0.041513	-0.00310522	0.0514203	0.033787	-0.00138187	0.0382888	-0.00709489	-0.00206356	0.00983655	-0.00285794	-0.045741	0.00269165	0.0684169	0.072059
APPL1	grey	grey	0.0719904	0.0593107	0.0296791	0.0452974	0.0342066	0.0389636	0.0348908	0.0126229	0.0233825	-0.00605503	-0.00866698	-0.00163967	0.0291767	0.0173524	0.0422348
POLR3A	grey	grey	0.0496872	0.0381933	0.0472766	0.0340061	-0.00697931	0.0289625	0.013875	0.0208803	0.0268366	0.0120572	-0.0291067	0.0112516	-0.00671316	-0.00369095	0.0513463
ENSMFAG00000044593	grey	grey	0.115477	0.0618486	0.0379079	0.0791251	0.0629059	0.133533	0.100299	0.128519	0.0736572	0.00288653	-0.0214518	0.0863543	0.0564795	-0.0519011	0.0226199
DR1	grey	grey	0.101779	0.0901556	0.0451763	0.0430174	0.0715591	0.0521504	1.65618e-05	0.0675105	0.0963558	-0.0224966	-0.0017495	0.0764985	-0.0098111	-0.0495949	0.0449383
NUP54	grey	grey	0.0763149	0.0491294	0.0424559	0.0724178	0.00225772	0.0851675	0.00955858	0.0359102	0.041872	-0.00216637	-0.030105	0.0392327	0.0291584	0.00967445	0.0439227
CTCF	grey	grey	0.104432	0.0725138	0.0780735	0.0949437	0.0055459	0.0609902	0.0218452	0.0097251	0.0190195	0.0453241	-0.0377615	-0.00736075	0.047527	0.0349682	0.0942328
ZMYM4	grey	grey	0.0663114	0.0498411	0.0338145	0.0728569	0.0125621	0.025469	0.000178485	0.0121481	0.0255115	0.00527039	0.00915119	0.0149272	0.0287411	0.0214412	0.0535414
RALB	grey	grey	0.104001	0.0515116	0.122092	0.0387888	0.0402387	0.0948571	0.0228611	0.0975257	0.0843198	0.0591765	-0.0261526	0.107376	-0.000536004	-0.100991	0.00478095
AATF	grey	grey	0.108178	0.0639655	0.0393851	0.0605276	0.0452458	0.10155	0.0175562	0.0881305	0.0809677	-0.0114356	0.00964076	0.09452	0.0327373	-0.0219484	0.031442
NUP205	grey	grey	0.070882	0.0240644	0.0382744	0.0585889	0.0183971	0.0568731	-0.0117747	0.0334855	0.0287932	0.00725441	0.0177	0.0320748	0.0169433	-0.0025402	0.0219686
CKS1B	grey	grey	0.154279	0.092107	0.106575	0.116928	0.020273	0.090239	0.0992333	0.0422174	0.0227691	0.0687679	-0.0865125	-0.0106564	0.0408424	0.0615544	0.0894818
PRPF31	grey	grey	0.116168	0.112386	0.0643573	0.0390875	0.0955478	0.0169314	0.0458255	0.0832653	0.0773659	0.012601	-0.0116389	0.0217058	-0.0140175	0.00234953	0.0895007
MSH3	grey	grey	0.0699179	0.0556524	0.00383786	0.0435396	0.0579282	0.0235979	0.0364924	0.046721	0.0268753	0.0236496	0.0275688	0.0108297	0.0278766	0.0257267	0.0447522
PPP1R21	grey	grey	0.0621442	0.0741251	0.00563065	0.0196296	0.0676805	0.00695524	-0.0245038	0.0325608	0.0581075	-0.0200165	0.0346905	0.0360704	-0.000565654	0.00609829	0.0521975
RBFA	grey	grey	0.124786	0.0899718	0.0369578	0.0634518	0.0879072	0.0349355	0.0974637	0.0722178	0.0408395	0.0087725	0.0123768	-0.00787362	0.0184226	0.0456834	0.0948566
ZNRD2	grey	grey	0.0962848	0.0142074	0.0178176	0.081517	0.059944	0.151242	0.0654003	0.145437	0.0372652	0.0105469	0.0279206	0.0827252	0.0829027	-0.0410378	-0.0212554
MATN2	grey	grey	0.00664786	0.00514766	0.0803834	0.0194143	-0.053155	-0.0288627	-0.00704075	-0.0705753	-0.0357273	0.0859676	-0.0771087	-0.0739236	0.000215956	0.0522617	0.0297682
CEP57	grey	grey	0.0944829	0.0697478	0.0529974	0.0630024	0.0306616	0.0204309	0.0312457	0.0200174	0.0325028	0.0392585	-0.0119558	-0.00257219	0.0138978	0.0325267	0.0790407
ZMIZ2	grey	grey	0.0344453	0.0267522	0.00925576	0.029406	0.0127634	0.040926	-0.0225066	0.0303395	0.0484872	-0.0255999	0.0155161	0.0725966	0.00499755	-0.0378736	0.0158567
PSPC1	grey	grey	0.0360807	0.0137016	0.00497966	0.0524023	-0.000464218	0.04755	-0.00428525	0.0161249	0.00954886	0.0200452	0.00866757	0.0201486	0.0320836	0.0183102	0.0231474
ENSMFAG00000043664	grey	grey	0.0999813	0.0593732	0.0458755	0.0737439	0.0355818	0.0546523	-0.00543947	0.045126	0.0546527	0.0119757	0.0293209	0.0541813	0.0238306	0.00313036	0.0486286
ENSMFAG00000038594	grey	grey	0.108608	0.0683805	0.0204973	0.063881	0.0787894	0.0990774	0.0678424	0.118465	0.062976	-0.00927838	0.00931566	0.0693372	0.0238286	-0.0182787	0.0325463
HPS5	grey	grey	0.0432578	0.0439627	0.0327123	0.00794618	0.037532	0.0140303	-0.0341627	0.0356191	0.0748194	-0.0130921	0.0242074	0.0806276	-0.014228	-0.0341731	0.01221
GALNT2	grey	grey	0.0116155	-0.0349617	-0.0380361	0.0159198	0.0312171	0.0257693	0.0075634	0.034123	-0.00733992	0.0479458	0.0884823	0.0573419	0.0625514	0.00489859	-0.0276755
FTSJ3	grey	grey	0.0813367	0.0389717	0.0312474	0.075075	0.0109783	0.110341	0.0160729	0.0553994	0.044214	0.00502678	-0.0216499	0.0606993	0.0488418	-0.00522925	0.0141859
N4BP1	grey	grey	0.050539	0.0352459	0.0108266	0.0621588	0.024256	0.0420425	-0.00364198	0.0277811	0.034104	0.00346728	0.0304195	0.0495201	0.0364187	0.018923	0.0471321
BBS7	grey	grey	0.031413	0.00897592	0.00294411	0.0413912	0.00994072	0.0350994	0.0300447	0.0328194	-0.00151855	0.0182082	0.0190484	0.0128127	0.0414348	0.0109599	-0.000964639
ENSMFAG00000021011	grey	grey	0.0946255	0.102426	0.031618	0.064554	0.0521995	0.041655	0.0150332	0.0335225	0.0722942	-0.0228193	-0.00303934	0.0352374	0.0178653	0.0276484	0.0864715
ATP6V0C	grey	grey	0.178983	0.152219	-0.00956407	0.0803863	0.212822	0.122842	0.0286038	0.188013	0.183173	-0.085865	0.164358	0.200392	0.0650885	-0.0322296	0.0911323
TCEA1	grey	grey	0.137885	0.11325	0.0662991	0.0776365	0.0731731	0.0646804	0.0408301	0.0820154	0.0799804	0.0110316	-0.000160206	0.0472144	0.000717735	0.00397618	0.103176
THADA	grey	grey	0.0656396	0.0717912	0.110178	0.0476105	0.00491286	0.0300682	-0.0194516	-0.00389376	0.0391852	0.0399369	-0.0574159	0.00616888	-0.0115675	-0.0127585	0.0806533
ZNF609	grey	grey	0.0732889	0.0604091	0.0994654	0.0797865	-0.0179089	0.0317866	-0.0118367	-0.0127848	0.0148306	0.0605032	-0.0385385	-0.00397413	0.0197539	0.0327316	0.0855527
UBE4A	grey	grey	0.069927	0.0617045	0.0291877	0.0390379	0.0387007	0.0423881	0.0120895	0.0539074	0.0548465	0.000590347	0.000248581	0.044149	0.0142103	-0.0141626	0.034659
DENND2D	grey	grey	0.0903068	0.104892	0.0308608	0.0226132	0.0978614	0.0353194	0.00235677	0.0744378	0.111075	-0.0313633	0.0288893	0.0750783	-0.0158581	-0.0572328	0.0555865
TRPM7	grey	grey	0.0559629	0.0335449	0.0806672	0.0713875	-0.032177	0.0289429	0.000418939	-0.0332851	-0.0138612	0.0598533	-0.0597443	-0.048915	0.0191211	0.0394346	0.050859
TAF15	grey	grey	0.122402	0.0723976	0.104808	0.10399	-0.00287366	0.0738099	0.0350743	0.0300961	0.0276638	0.0545907	-0.0446906	0.0101554	0.0295571	0.0339937	0.0919245
KANSL2	grey	grey	0.0397483	0.0318761	0.0331136	0.0413726	0.00328195	0.0386512	0.00325126	0.0130393	0.0182998	-0.00699325	-0.014048	0.00967466	0.0106646	0.0015324	0.0319918
NELFA	grey	grey	0.06134	0.0532087	0.0322769	0.0459608	0.0172776	0.0348784	0.00432969	0.0348133	0.0411914	0.00414551	-0.00381736	0.0233899	0.00928073	6.50635e-05	0.0468165
PRPF40B	grey	grey	0.0576169	0.0527027	0.0519405	0.0524821	0.00103593	-0.00161971	-0.00654503	-0.0126102	0.0200961	0.0282364	-0.0203303	-0.00743326	-0.00595514	0.0256566	0.0685394
CSNK1G1	grey	grey	0.0911739	0.0741207	0.069642	0.0620228	0.0400127	0.0381745	-0.0101549	0.025479	0.0555116	0.0236587	-0.00467172	0.0322115	0.0269169	-0.00783669	0.0864543
CABIN1	grey	grey	0.0454226	0.0442573	0.0478295	0.0480788	0.00309331	-0.00478483	-0.00183485	-0.0236776	-0.0066918	0.0475312	-0.0220155	-0.0394036	-0.00782201	0.046842	0.0668407
SLC12A4	grey	grey	0.0681938	0.0438187	0.232006	0.102016	-0.0949028	0.0239858	0.00927638	-0.0737792	-0.0510722	0.197663	-0.149128	-0.0914407	0.0229923	0.045245	0.127713
ENSMFAG00000002442	grey	grey	0.0816513	0.0590694	0.0237561	0.0458275	0.0739544	0.0568071	0.0383251	0.0807612	0.0518641	0.00980086	0.0246498	0.0448601	0.027024	-0.0214464	0.0309602
ENSMFAG00000035190	grey	grey	0.22437	0.182928	0.170137	0.071417	0.174161	0.102245	0.18441	0.219525	0.172838	0.0646758	-0.0251075	0.122943	0.0033622	-0.0890362	0.118955
LSM10	grey	grey	0.132355	0.131209	0.0397361	0.0471655	0.100796	0.0473677	0.0408308	0.0845844	0.101517	-0.0184083	0.00158531	0.0452485	-0.00582851	0.00372663	0.113527
YY1AP1	grey	grey	0.0967011	0.0711617	0.0408718	0.0543608	0.0460527	0.0601501	-0.00491277	0.0428726	0.0653911	0.00421685	0.0283003	0.0630374	0.022021	-0.00133127	0.0568087
BPTF	grey	grey	0.111457	0.0878101	0.0617066	0.0819936	0.0333196	0.0251269	0.00236392	0.024095	0.0540798	0.0357103	0.0158526	0.0329605	0.0251352	0.0391713	0.123141
ATP13A1	grey	grey	0.0591747	0.0395288	0.017798	0.0326902	0.0427171	0.0297083	-0.0123639	0.0406793	0.0286686	0.0101034	0.0375413	0.0289549	0.0178831	-0.019603	0.0261405
COMMD9	grey	grey	0.0546936	0.0565883	-0.00827486	0.00818104	0.0817817	-0.0206524	0.0345881	0.0438618	0.0278144	0.0133139	0.0191705	-0.0101867	0.00180104	0.0230907	0.0369744
HMGN4	grey	grey	0.0736972	0.0342198	-0.0318143	0.0651926	0.0404099	0.0590641	0.0774541	0.0392496	3.64701e-05	-0.0131011	0.0397376	0.00374182	0.0670764	0.0738555	0.0285315
OTUD5	grey	grey	0.0932522	0.0954069	0.0478329	0.0462545	0.060171	0.0293738	0.0109245	0.0430376	0.0667532	0.0146191	0.0217907	0.0378291	0.0019696	0.00380146	0.0805521
TENT2	grey	grey	0.0412811	0.0315239	0.021324	0.0654851	0.0050852	0.0243135	0.0152542	0.00651128	-0.00211343	0.0133452	-0.010249	-0.012022	0.0235814	0.0347603	0.0426035
CAPRIN1	grey	grey	0.132124	0.0576733	0.09542	0.101484	0.0334351	0.129835	0.0243632	0.0854154	0.0478834	0.0571279	-0.0160967	0.0637127	0.0574247	-0.0437797	0.0309154
NAE1	grey	grey	0.133546	0.0888591	0.0258977	0.101533	0.0850707	0.0699839	0.0833191	0.0783023	0.0396885	0.0157108	0.00413647	0.0134618	0.0476562	0.050658	0.0740885
ZFHX3	grey	grey	0.0458722	0.00467549	0.0475392	0.0710944	-0.0168421	0.0168437	0.0272699	-0.00627466	-0.0465824	0.105015	-0.0143797	-0.0515643	0.0581942	0.0753577	0.0492077
EGLN1	grey	grey	0.0885728	0.0732535	0.0805765	0.0691624	0.00243503	0.0297086	0.0282201	0.00587511	0.0365089	0.0279551	-0.0363971	0.00798696	0.00243335	0.0318062	0.0681168
NKAPD1	grey	grey	0.0401579	0.01171	0.00224521	0.0383121	0.00249112	0.0488022	0.0163576	0.0300143	0.0111707	-0.00463982	0.00932631	0.02772	0.0284315	0.00200206	0.006235
TMEM41A	grey	grey	0.0577762	0.06847	0.0265525	0.0215196	0.0363791	0.0273614	-0.00432618	0.0378732	0.0735026	-0.0282947	0.00616087	0.0713484	-0.00174644	-0.00783848	0.0462617
UTRN	grey	grey	0.0647824	0.036454	-0.0248031	0.0609454	0.0618813	-0.0163347	0.0388133	0.0172195	0.00159487	0.0472892	0.0758853	-0.016309	0.0506956	0.0585216	0.0788724
NMRAL1	grey	grey	0.0662698	0.0773806	0.00230351	0.0175683	0.0870428	-0.0195097	0.035923	0.0564397	0.0441529	-0.00332507	0.0376514	-0.00116447	-0.0106772	0.0265184	0.0842267
ENSMFAG00000035664	grey	grey	0.076904	-0.00327218	0.0210383	0.10488	0.0175971	0.0570727	0.059852	0.0445147	-0.0256721	0.0955235	0.0359195	0.00454352	0.0898778	0.0558873	0.0385913
[truncated: 4,934 more rows]

## Sheet: Interest Module
gene_name	module
FAT2	magenta
ENSMFAG00000001649	magenta
ENSMFAG00000032324	magenta
RNF170	magenta
RNF187	magenta
TOB1	magenta
TCEA3	magenta
PIK3IP1	magenta
PPFIBP2	magenta
SREBF1	magenta
FAM53B	magenta
XPC	magenta
EEF2K	magenta
SPSB3	magenta
SEMA4A	magenta
ENSMFAG00000036969	magenta
ATP6AP2	magenta
MEIS1	magenta
ING4	magenta
IGSF9	magenta
FOSB	magenta
MKNK2	magenta
ANKZF1	magenta
NUDT16L1	magenta
LAMP1	magenta
FAXDC2	magenta
ALDH3A2	magenta
CCDC51	magenta
CHD6	magenta
NDN	magenta
FLOT2	magenta
FAM169A	magenta
CTSF	magenta
LBH	magenta
GLUL	magenta
KREMEN1	magenta
DIPK1B	magenta
TNRC6C	magenta
LRIG3	magenta
MSI2	magenta
MMAB	magenta
ANP32A	magenta
PCYOX1	magenta
SYPL1	magenta
CEBPD	magenta
CCDC34	magenta
BMP7	magenta
CSAD	magenta
AKR7A2	magenta
DUSP23	magenta
HLF	magenta
TEX264	magenta
CRYL1	magenta
ZBTB4	magenta
CARS2	magenta
SLC25A4	magenta
OVOL2	magenta
ENSMFAG00000032635	magenta
COA5	magenta
ABCG1	magenta
NME6	magenta
PAX6	magenta
NSL1	magenta
PDCD4	magenta
LAMB4	magenta
ENSMFAG00000044879	magenta
GRTP1	magenta
CDKN1B	magenta
BAIAP2	magenta
GPCPD1	magenta
PLLP	magenta
FOXP1	magenta
ACTR1B	magenta
FBXL3	magenta
GATM	magenta
NISCH	magenta
CBR3	magenta
NFU1	magenta
TMEM42	magenta
JDP2	magenta
CASP6	magenta
LAMA5	magenta
ENSMFAG00000003206	magenta
ARHGEF28	magenta
KLHDC2	magenta
BNC2	magenta
RARB	magenta
ANAPC16	magenta
RALBP1	magenta
ECI2	magenta
PER2	magenta
STUB1	magenta
MCCC1	magenta
LGR4	magenta
PLCH2	magenta
SFXN1	magenta
TFAP2C	magenta
CBX4	magenta
ATF3	magenta
ENSMFAG00000025106	magenta
ING2	magenta
CBX1	magenta
BTG2	magenta
TNRC6B	magenta
KITLG	magenta
KIF13A	magenta
H2AW	magenta
NYNRIN	magenta
PER1	magenta
SSH3	magenta
SCOC	magenta
BHLHE40	magenta
HCFC1R1	magenta
PHF21A	magenta
PDE7A	magenta
WLS	magenta
ACVR1B	magenta
FBXO27	magenta
CDK5RAP3	magenta
PER3	magenta
WNT4	magenta
SMARCA2	magenta
DCAF8	magenta
HINT3	magenta
MAP3K1	magenta
CRAT	magenta
HMGB2	magenta
GAS6	magenta
AVPI1	magenta
CRADD	magenta
ZNF652	magenta
FOXP2	magenta
SLC25A11	magenta
RSBN1L	magenta
ZNF395	magenta
PPP1R12B	magenta
BPHL	magenta
PRIMPOL	magenta
HBP1	magenta
HES1	magenta
DMRTA2	magenta
FOXQ1	magenta
PLEKHH3	magenta
ENSMFAG00000019454	magenta
ACAP3	magenta
ISOC2	magenta
CMTM8	magenta
ENSMFAG00000041183	magenta
UBC	magenta
HDAC10	magenta
JADE1	magenta
RCOR3	magenta
MT1X	magenta
ABHD8	magenta
COQ8B	magenta
LPAR3	magenta
TGFB2	magenta
TMEM159	magenta
PCMTD1	magenta
SSU72	magenta
RAB40C	magenta
ENSMFAG00000034658	magenta
LAMB1	magenta
NPEPL1	magenta
RERE	magenta
PIM3	magenta
PAAF1	magenta
HOOK2	magenta
RPA2	magenta
KLHL14	magenta
ENSMFAG00000036124	magenta
METTL5	magenta
ELMSAN1	magenta
TMEM19	magenta
ENSMFAG00000033343	magenta
DDR1	magenta
SYTL1	magenta
EFS	magenta
YPEL	magenta
CBR1	magenta
PSMB9	salmon
PTN	salmon
CTNNAL1	salmon
COL16A1	salmon
CCN1	salmon
ITGAV	salmon
TGM2	salmon
AGRN	salmon
SPTBN1	salmon
IGFBP7	salmon
SPARC	salmon
MAGED1	salmon
CXCL14	salmon
ITGA6	salmon
ENSMFAG00000039395	salmon
CD151	salmon
CLU	salmon
CAV2	salmon
SULF2	salmon
COL7A1	salmon
SERPINH1	salmon
FXYD5	salmon
ITGB4	salmon
IVNS1ABP	salmon
COL5A2	salmon
TAGLN	salmon
TPM1	salmon
CAV1	salmon
CYP1B1	salmon
SFRP1	salmon
NPC2	salmon
WNT7A	salmon
BASP1	salmon
SLC38A5	salmon
FERMT1	salmon
TENM2	salmon
CKLF	salmon
ARL4C	salmon
CALD1	salmon
CEP170	salmon
VIM	salmon
BNIP3	salmon
HTRA1	salmon
SMAD7	salmon
APP	salmon
CLIC4	salmon
NRG1	salmon
ENSMFAG00000036985	salmon
CAVIN3	salmon
IFI27	salmon
VIT	salmon
FLNA	salmon
TCAF1	salmon
ATP1B1	salmon
COL17A1	salmon
C4orf48	salmon
SLC2A1	salmon
SLC39A13	salmon
PALLD	salmon
COL18A1	salmon
KRT7	salmon
ENSMFAG00000003315	salmon
SEC63	salmon
PMEPA1	salmon
S100A13	salmon
AJUBA	salmon
CA2	salmon
FN1	salmon
RBP1	salmon
GOLGA5	turquoise
ENSMFAG00000031659	turquoise
GRAMD2B	turquoise
CDC42EP1	turquoise
MOB4	turquoise
RNF8	turquoise
DYNLT3	turquoise
ZNF57	turquoise
MAL	turquoise
VAMP7	turquoise
LMTK2	turquoise
CRYBG1	turquoise
ENSA	turquoise
AACS	turquoise
MARVELD3	turquoise
CERS3	turquoise
MALL	turquoise
ZBTB7B	turquoise
UBALD1	turquoise
FABP3	turquoise
CCDC186	turquoise
DAPL1	turquoise
ARG2	turquoise
RHBDF1	turquoise
UBE2H	turquoise
TREX2	turquoise
DOP1B	turquoise
ENSMFAG00000036093	turquoise
SLC9A3R1	turquoise
VDAC2	turquoise
TMEM9B	turquoise
SLC31A2	turquoise
DSP	turquoise
DYRK2	turquoise
RPS6KA4	turquoise
TECR	turquoise
MARCKS	turquoise
LYPD3	turquoise
TOR1AIP2	turquoise
TICAM1	turquoise
ENSMFAG00000002856	turquoise
ENSMFAG00000039932	turquoise
ATP5F1B	turquoise
ENSMFAG00000031625	turquoise
RHOV	turquoise
ZNF770	turquoise
LAMTOR3	turquoise
THBS1	turquoise
DENND2C	turquoise
CNDP2	turquoise
ENSMFAG00000005696	turquoise
ENSMFAG00000043121	turquoise
PKP1	turquoise
PHLDB3	turquoise
RNF10	turquoise
C2CD2L	turquoise
SERBP1	turquoise
TRIM29	turquoise
ESRP2	turquoise
AGR2	turquoise
RASGRP2	turquoise
DAPP1	turquoise
ELOB	turquoise
MDM2	turquoise
ALDH1A1	turquoise
MSMO1	turquoise
ZFAND2B	turquoise
ENSMFAG00000036411	turquoise
ENSMFAG00000037676	turquoise
PLS3	turquoise
MLPH	turquoise
PYGL	turquoise
SCAMP2	turquoise
ARL5B	turquoise
STK24	turquoise
ILRUN	turquoise
LLGL2	turquoise
ENSMFAG00000002157	turquoise
PTPN13	turquoise
RASSF7	turquoise
MAP7D1	turquoise
UBB	turquoise
ENSMFAG00000039671	turquoise
CLDN1	turquoise
NEDD4L	turquoise
MFSD4A	turquoise
RPN2	turquoise
IRF6	turquoise
C4orf19	turquoise
METRNL	turquoise
DSTN	turquoise
MPP5	turquoise
TTPAL	turquoise
HIGD1A	turquoise
TRAFD1	turquoise
IDI1	turquoise
ENSMFAG00000043424	turquoise
USP4	turquoise
SAT1	turquoise
TJP1	turquoise
PPP6R3	turquoise
UBE2E2	turquoise
CLTA	turquoise
KIF13B	turquoise
ENSMFAG00000042248	turquoise
GYG1	turquoise
CAPZA2	turquoise
AMOTL2	turquoise
BCL2L13	turquoise
ADPRHL2	turquoise
EPB41L1	turquoise
TEC	turquoise
CRTAC1	turquoise
CHMP2A	turquoise
HLA-DRA	turquoise
RNF39	turquoise
PLK3	turquoise
CORO1C	turquoise
GSK3B	turquoise
PARP12	turquoise
SESN2	turquoise
MTMR3	turquoise
TNNT3	turquoise
CCND1	turquoise
MTHFD2L	turquoise
ENSMFAG00000044475	turquoise
CCSER2	turquoise
UBTD1	turquoise
GNG12	turquoise
PLA2G4A	turquoise
CLEC7A	turquoise
S100A14	turquoise
KIF1C	turquoise
ENSMFAG00000033840	turquoise
RCBTB1	turquoise
ATP6V1F	turquoise
SDC1	turquoise
ABHD17B	turquoise
GIPC1	turquoise
FAM83B	turquoise
ENSMFAG00000034073	turquoise
CYP26B1	turquoise
ENSMFAG00000002087	turquoise
ARAP2	turquoise
STK38	turquoise
ACSL1	turquoise
ENSMFAG00000007405	turquoise
EMB	turquoise
ENSMFAG00000015538	turquoise
SIRT7	turquoise
C6orf132	turquoise
ADGRF1	turquoise
ETHE1	turquoise
PACSIN3	turquoise
ATP5F1E	turquoise
APOBEC3C	turquoise
GPR37	turquoise
F2RL1	turquoise
MBD2	turquoise
GNE	turquoise
RFFL	turquoise
PLEKHN1	turquoise
SERF2	turquoise
FNBP1L	turquoise
CPNE8	turquoise
FADD	turquoise
HR	turquoise
TXNDC17	turquoise
USP43	turquoise
CRB3	turquoise
C1orf116	turquoise
RHOD	turquoise
USP6NL	turquoise
EIF3C	turquoise
CHP1	turquoise
CHL1	turquoise
ENSMFAG00000003325	turquoise
ATP6V1E1	turquoise
MID2	turquoise
NRBF2	turquoise
PSEN1	turquoise
LY6G6C	turquoise
MFSD14B	turquoise
IST1	turquoise
ARL5A	turquoise
GALNT12	turquoise
SLC25A3	turquoise
GSKIP	turquoise
ENSMFAG00000046303	turquoise
USP12	turquoise
RAB18	turquoise
PPP1CB	turquoise
TLE1	turquoise
FAM83A	turquoise
PGLYRP4	turquoise
DPRX	turquoise
IFI27L2	turquoise
PVRL4	turquoise
ENSMFAG00000036559	turquoise
ENSMFAG00000044454	turquoise
ENSMFAG00000001776	turquoise
ERBB3	turquoise
LY6D	turquoise
SLC12A6	turquoise
ZNF330	turquoise
ADPRH	turquoise
NAP1L4	turquoise
CD9	turquoise
KIF5B	turquoise
GSDMC	turquoise
MRPL20	turquoise
FOXP4	turquoise
SCYL2	turquoise
GRHL1	turquoise
TMEM127	turquoise
CDYL	turquoise
RIPK2	turquoise
ENSMFAG00000030388	turquoise
ADIRF	turquoise
ACAA2	turquoise
ENSMFAG00000034636	turquoise
MINK1	turquoise
ARPC1B	turquoise
ATP5F1C	turquoise
ENSMFAG00000003171	turquoise
ACLY	turquoise
ENSMFAG00000003072	turquoise
VAMP8	turquoise
HSD17B5	turquoise
CLCF1	turquoise
MACO1	turquoise
IL18	turquoise
UCHL5	turquoise
TWF1	turquoise
PCDH1	turquoise
PPL	turquoise
TALDO1	turquoise
IL20RA	turquoise
TUBB2A	turquoise
SPTLC2	turquoise
OSTF1	turquoise
STK38L	turquoise
SMARCC1	turquoise
DGKA	turquoise
FAM104A	turquoise
LYPD2	turquoise
CARHSP1	turquoise
OPTN	turquoise
LNX1	turquoise
TET2	turquoise
RMDN3	turquoise
TMBIM1	turquoise
PNRC1	turquoise
TLCD1	turquoise
ACTR2	turquoise
PPIF	turquoise
MARK2	turquoise
RRAGC	turquoise
SLC17A5	turquoise
ENSMFAG00000031271	turquoise
STAP2	turquoise
CTR9	turquoise
KMO	turquoise
LRRFIP2	turquoise
WSB1	turquoise
MPZL3	turquoise
ENSMFAG00000037796	turquoise
SNW1	turquoise
CTNNA1	turquoise
ARHGAP32	turquoise
NOTCH2	turquoise
CD99	turquoise
SCIN	turquoise
HAS3	turquoise
KCTD10	turquoise
COX4I2	turquoise
TOLLIP	turquoise
ENSMFAG00000037377	turquoise
SQLE	turquoise
ENSMFAG00000035899	turquoise
TM7SF2	turquoise
ITCH	turquoise
HES2	turquoise
POLB	turquoise
ETNPPL	turquoise
RNF11	turquoise
CDC42BPB	turquoise
S100A6	turquoise
CCDC12	turquoise
GPX1	turquoise
AGR3	turquoise
HSD17B2	turquoise
FLII	turquoise
ASPH	turquoise
MAGT1	turquoise
NDUFA1	turquoise
EPS8L1	turquoise
CDK16	turquoise
KIAA1522	turquoise
IPMK	turquoise
NCKAP1	turquoise
DNAJB6	turquoise
BLNK	turquoise
ENSMFAG00000000709	turquoise
ENSMFAG00000036987	turquoise
TRAPPC3	turquoise
NPEPPS	turquoise
ADGRE5	turquoise
ENSMFAG00000030493	turquoise
KLHL2	turquoise
ZNF165	turquoise
TRIP10	turquoise
PIP5K1A	turquoise
MCL1	turquoise
CDH1	turquoise
ENSMFAG00000033691	turquoise
PCYT1A	turquoise
MARVELD2	turquoise
ENSMFAG00000032638	turquoise
EPS8L2	turquoise
RRBP1	turquoise
COX17	turquoise
MAB21L4	turquoise
MTCH1	turquoise
ENSMFAG00000042302	turquoise
OSER1	turquoise
SLC9A1	turquoise
KRT27	turquoise
EBP	turquoise
PARD3	turquoise
ENSMFAG00000041056	turquoise
ENSMFAG00000039061	turquoise
ENSMFAG00000001487	turquoise
ENSMFAG00000034640	turquoise
ENSMFAG00000034129	turquoise
SHOC2	turquoise
MACC1	turquoise
ARPC5	turquoise
PPP1R3C	turquoise
SAMD9	turquoise
AGPAT2	turquoise
NPC1	turquoise
ACTG2	turquoise
AIMP1	turquoise
LGALS3	turquoise
COX6A1	turquoise
UBE2K	turquoise
ENSMFAG00000000409	turquoise
AP3S1	turquoise
CHMP2B	turquoise
PKP3	turquoise
EMP2	turquoise
RAC1	turquoise
DKK3	turquoise
ENSMFAG00000006345	turquoise
ENSMFAG00000028669	turquoise
HDLBP	turquoise
CKAP4	turquoise
UACA	turquoise
RNF7	turquoise
ADCY7	turquoise
CIDEA	turquoise
EDF1	turquoise
MRPS18A	turquoise
PDZD11	turquoise
ST3GAL6	turquoise
TMCC1	turquoise
NECTIN2	turquoise
ATP5IF1	turquoise
ENSMFAG00000044385	turquoise
KRT12	turquoise
ORMDL2	turquoise
ATP6V1D	turquoise
RAD23B	turquoise
KIF21A	turquoise
SKP1	turquoise
ETV6	turquoise
NT5C2	turquoise
JUP	turquoise
CUX1	turquoise
UBE2V1	turquoise
CLINT1	turquoise
FNIP2	turquoise
NUDT8	turquoise
TAOK3	turquoise
CTSC	turquoise
FH	turquoise
CDKN2B	turquoise
IKZF2	turquoise
ENSMFAG00000036111	turquoise
MOCOS	turquoise
MICU1	turquoise
ENSMFAG00000043781	turquoise
MYO5B	turquoise
EXPH5	turquoise
PGLYRP3	turquoise
ANXA7	turquoise
MRPL35	turquoise
ENSMFAG00000004741	turquoise
UQCRQ	turquoise
PTTG1IP	turquoise
ZDHHC13	turquoise
PSMD2	turquoise
DSC2	turquoise
LGALSL	turquoise
ATP5MG	turquoise
SERINC2	turquoise
ERBIN	turquoise
RNF144B	turquoise
NCK1	turquoise
CALM1	turquoise
INAVA	turquoise
LACTB	turquoise
JARID2	turquoise
AP1B1	turquoise
WIPF2	turquoise
RAPH1	turquoise
CYSRT1	turquoise
TMED5	turquoise
ENSMFAG00000002724	turquoise
GDPD2	turquoise
WNT9A	turquoise
PRR13	turquoise
SDR16C5	turquoise
ENC1	turquoise
STAT1	turquoise
ATL3	turquoise
VOPP1	turquoise
CAP1	turquoise
SP140	turquoise
TMOD3	turquoise
JAML	turquoise
EPB41L5	turquoise
TMEM134	turquoise
ENSMFAG00000030421	turquoise
NCBP2	turquoise
PLEKHG6	turquoise
RIN2	turquoise
CDKN1A	turquoise
AK3	turquoise
ARHGAP23	turquoise
SREBF2	turquoise
TMEM167A	turquoise
SLC12A2	turquoise
ARHGAP30	turquoise
PFDN6	turquoise
SNX9	turquoise
ENSMFAG00000041417	turquoise
SDCBP2	turquoise
CASP7	turquoise
TOP1MT	turquoise
ENSMFAG00000030519	turquoise
ADAM15	turquoise
PDCD10	turquoise
ZBTB43	turquoise
DNAJC5	turquoise
ME1	turquoise
ATP6V0E1	turquoise
ENSMFAG00000001146	turquoise
ENSMFAG00000002373	turquoise
ENSMFAG00000013210	turquoise
ZNF750	turquoise
PLXDC2	turquoise
FEM1C	turquoise
MRPS10	turquoise
STRN	turquoise
ELF3	turquoise
THSD1	turquoise
MOB2	turquoise
CPEB4	turquoise
LYNX1-SLURP2	turquoise
ARL4D	turquoise
PLCD1	turquoise
TES	turquoise
RAB22A	turquoise
TMEM54	turquoise
TACSTD2	turquoise
CHCHD5	turquoise
FMR1	turquoise
P2RY2	turquoise
KCTD11	turquoise
ENSMFAG00000043193	turquoise
ENSMFAG00000021008	turquoise
DSG1	turquoise
CPE	turquoise
ENSMFAG00000000063	turquoise
PDLIM5	turquoise
GOLGA4	turquoise
TRIM62	turquoise
DENND1B	turquoise
MRPS12	turquoise
RARG	turquoise
LONP2	turquoise
ENSMFAG00000003555	turquoise
MKKS	turquoise
EPGN	turquoise
PPP1R14C	turquoise
ACOT9	turquoise
ENSMFAG00000003238	turquoise
NR2C1	turquoise
SPINT2	turquoise
ENSMFAG00000044202	turquoise
PLEKHB2	turquoise
GCAT	turquoise
CD109	turquoise
ERCC6	turquoise
NIBAN2	turquoise
BICDL2	turquoise
ARF6	turquoise
UBALD2	turquoise
SRI	turquoise
TDG	turquoise
GLTP	turquoise
RHOC	turquoise
ENSMFAG00000000927	turquoise
OSBPL2	turquoise
GRHL3	turquoise
ANXA11	turquoise
CTTNBP2NL	turquoise
CTNNBIP1	turquoise
MKRN1	turquoise
SEC14L1	turquoise
TP53INP2	turquoise
ENSMFAG00000001584	turquoise
EIF4G3	turquoise
C16orf72	turquoise
STX11	turquoise
H2AJ	turquoise
HRAS	turquoise
DDAH2	turquoise
UBE2B	turquoise
HSPB1	turquoise
TSPAN14	turquoise
ENSMFAG00000046245	turquoise
TOMM6	turquoise
NAB1	turquoise
ENSMFAG00000002548	turquoise
CDC40	turquoise
ENSMFAG00000035854	turquoise
EMP1	turquoise
PRKCH	turquoise
CCDC120	turquoise
OSBPL3	turquoise
SCNN1A	turquoise
CYP27C1	turquoise
EDEM1	turquoise
S100A4	turquoise
VPS18	turquoise
ARNTL	turquoise
UQCRB	turquoise
LAMP2	turquoise
MYD88	turquoise
B3GNT3	turquoise
TMEM79	turquoise
ABHD16A	turquoise
RAB24	turquoise
OSBPL11	turquoise
SH3GLB1	turquoise
RAB11A	turquoise
TMEM144	turquoise
ELF1	turquoise
ENSMFAG00000044538	turquoise
PPP1R11	turquoise
PPP4C	turquoise
PTBP3	turquoise
C1orf74	turquoise
MAFF	turquoise
MACROH2A1	turquoise
SLC37A1	turquoise
GJB2	turquoise
COX7B	turquoise
YWHAB	turquoise
TAX1BP1	turquoise
MAL2	turquoise
ACTR1A	turquoise
CYB5R4	turquoise
ENSMFAG00000031459	turquoise
SF3B6	turquoise
HMGCS1	turquoise
GAREM1	turquoise
GALNT3	turquoise
NCK2	turquoise
COQ10B	turquoise
KRT24	turquoise
ALS2CL	turquoise
TMEM50A	turquoise
PDCD6IP	turquoise
ENSMFAG00000046143	turquoise
NBEAL2	turquoise
TIAM1	turquoise
CIB1	turquoise
MRPL42	turquoise
MFF	turquoise
ZNF823	turquoise
BSPRY	turquoise
RIDA	turquoise
ENSMFAG00000001340	turquoise
RBKS	turquoise
ZFAND6	turquoise
PERP	turquoise
TMEM147	turquoise
MUC22	turquoise
UBA1	turquoise
CDC42SE1	turquoise
PUM1	turquoise
PPP1R13L	turquoise
CD58	turquoise
NDUFS6	turquoise
NSF	turquoise
CAPZA1	turquoise
HSD17B8	turquoise
ENSMFAG00000042021	turquoise
ATG4A	turquoise
ENSMFAG00000037155	turquoise
SLK	turquoise
SERINC3	turquoise
CLDN7	turquoise
TCF7L2	turquoise
ABI1	turquoise
GNA13	turquoise
CHMP4C	turquoise
GMFB	turquoise
ENSMFAG00000036062	turquoise
RAP2B	turquoise
RNF141	turquoise
GTF2H1	turquoise
SLAIN2	turquoise
ENSMFAG00000007624	turquoise
MMADHC	turquoise
PPP2CA	turquoise
LMO7	turquoise
CLDN4	turquoise
ENSMFAG00000046193	turquoise
CLDND1	turquoise
SC5D	turquoise
BAIAP2L1	turquoise
STX19	turquoise
MED13	turquoise
ENSMFAG00000038110	turquoise
WDR26	turquoise
AFDN	turquoise
MYL12A	turquoise
PSENEN	turquoise
CD74	turquoise
SLC4A1AP	turquoise
CD55	turquoise
GNAI3	turquoise
ENSMFAG00000035648	turquoise
MYH14	turquoise
MYO6	turquoise
CAMK2N1	turquoise
KCTD9	turquoise
HOOK3	turquoise
ENSMFAG00000045971	turquoise
PID1	turquoise
TMEM102	turquoise
KRT3	turquoise
TMEM265	turquoise
CHIC2	turquoise
CLTC	turquoise
RTCB	turquoise
DAD1	turquoise
BOK	turquoise
DUSP3	turquoise
SH3BGRL3	turquoise
FAM135A	turquoise
SLIRP	turquoise
COBLL1	turquoise
BAG3	turquoise
UPK1B	turquoise
TIGAR	turquoise
RUSC1	turquoise
ENSMFAG00000030964	turquoise
KAZN	turquoise
ENSMFAG00000027932	turquoise
KLF6	turquoise
CLEC2B	turquoise
EBPL	turquoise
ENSMFAG00000032060	turquoise
TTL	turquoise
CSTB	turquoise
GALNT7	turquoise
PIM1	turquoise
OCLN	turquoise
TRIM25	turquoise
RB1	turquoise
NSDHL	turquoise
MPZL2	turquoise
ENSMFAG00000045321	turquoise
HOMER2	turquoise
TMPRSS11D	turquoise
NDUFB6	turquoise
SDHD	turquoise
MGARP	turquoise
RELL1	turquoise
TP53I3	turquoise
RND3	turquoise
ENSMFAG00000032516	turquoise
CBX6	turquoise
ENSMFAG00000043507	turquoise
RIT1	turquoise
EXOC5	turquoise
RALA	turquoise
PAXX	turquoise
WASL	turquoise
KLHL18	turquoise
BTG1	turquoise
CLIP1	turquoise
PLAAT2	turquoise
MTPN	turquoise
TMEM40	turquoise
LRRC1	turquoise
CDKN2AIP	turquoise
PTGS2	turquoise
EPS15	turquoise
ENSMFAG00000042444	turquoise
PLEKHG1	turquoise
APEH	turquoise
PRDX5	turquoise
ADGRF4	turquoise
PLEKHM1	turquoise
SCEL	turquoise
ENSMFAG00000036404	turquoise
MKRN2OS	turquoise
COPS8	turquoise
CTNND1	turquoise
MRPS5	turquoise
ENSMFAG00000030704	turquoise
TUFT1	turquoise
ATP5ME	turquoise
SLURP1	turquoise
TXNDC9	turquoise
NAGK	turquoise
ENSMFAG00000001435	turquoise
ITPKC	turquoise
ENSMFAG00000032614	turquoise
OXSR1	turquoise
MBOAT1	turquoise
CASP4	turquoise
S100A3	turquoise
CISH	turquoise
ENSMFAG00000046246	turquoise
B4GALNT3	turquoise
AKAP13	turquoise
STK19	turquoise
ENSMFAG00000044304	turquoise
SEPTIN9	yellow
ENSMFAG00000030460	yellow
MYDGF	yellow
EIF3K	yellow
MRPL1	yellow
APEX1	yellow
HSPH1	yellow
P3H2	yellow
RPL27A	yellow
LIMA1	yellow
EIF3E	yellow
ENSMFAG00000030096	yellow
ITGB6	yellow
RPS3A	yellow
SLC7A8	yellow
ENSMFAG00000025024	yellow
PTGFRN	yellow
BEX3	yellow
MITD1	yellow
ENSMFAG00000002939	yellow
ENSMFAG00000040595	yellow
P4HB	yellow
ENSMFAG00000045720	yellow
GSTP1	yellow
RPS10	yellow
PDLIM7	yellow
CD44	yellow
ENSMFAG00000008239	yellow
CDK4	yellow
RPS21	yellow
ISCA1	yellow
MYH9	yellow
ATP1A1	yellow
CKS2	yellow
RPSA	yellow
FBLIM1	yellow
SCARA3	yellow
ENSMFAG00000014721	yellow
IGFBP2	yellow
RPS14	yellow
RPS17	yellow
ENSMFAG00000003478	yellow
ENSMFAG00000035517	yellow
ENSMFAG00000037720	yellow
POLR2F	yellow
CAVIN1	yellow
SEC24D	yellow
RPL15	yellow
ENSMFAG00000039478	yellow
EEF1D	yellow
RPL3	yellow
CD276	yellow
CHCHD10	yellow
ALOX15B	yellow
LTB4R2	yellow
LDHB	yellow
S100A2	yellow
RPL27	yellow
BST2	yellow
FAU	yellow
LTBP4	yellow
RPS20	yellow
ENSMFAG00000031422	yellow
LOXL1	yellow
BTG3	yellow
KRTCAP2	yellow
ENSMFAG00000007971	yellow
ENSMFAG00000039896	yellow
ENSMFAG00000001097	yellow
ENSMFAG00000040972	yellow
ENSMFAG00000037923	yellow
MAN1A1	yellow
CXCL1	yellow
ENSMFAG00000031749	yellow
CXCL8	yellow
SERPINE2	yellow
TGFB1	yellow
ENSMFAG00000039524	yellow
ENSMFAG00000000835	yellow
RPS29	yellow
IFT57	yellow
EEF1B2	yellow
RPL18A	yellow
NDUFA4L2	yellow
ENSMFAG00000038803	yellow
ENSMFAG00000003143	yellow
STON2	yellow
ENSMFAG00000029971	yellow
WFDC2	yellow
LAMC2	yellow
FTL	yellow
RPS16	yellow
ENSMFAG00000003078	yellow
ENSMFAG00000039064	yellow
RPL4	yellow
LAMA3	yellow
RPL35A	yellow
ENSMFAG00000031476	yellow
ENSMFAG00000002472	yellow
RPL18	yellow
MSN	yellow
ENSMFAG00000037195	yellow
COPRS	yellow
RPS7	yellow
RPLP2	yellow
RPL35	yellow
PSMB7	yellow
ENSMFAG00000021547	yellow
VWA1	yellow
HSP90AA1	yellow
FERMT2	yellow
EPHB4	yellow
B2M	yellow
RUNX1	yellow
RPS26	yellow
ENSMFAG00000036789	yellow
RRAS	yellow
ENSMFAG00000003858	yellow
SESTD1	yellow
ENSMFAG00000000351	yellow
ENSMFAG00000030786	yellow
TCEAL4	yellow
ENSMFAG00000030598	yellow
ENSMFAG00000038633	yellow
SHC1	yellow
BCAM	yellow
ENSMFAG00000034295	yellow
EIF3F	yellow
IL13RA1	yellow
ENSMFAG00000036310	yellow
RRP1B	yellow
ENSMFAG00000000984	yellow
ENSMFAG00000003424	yellow
RPS12	yellow
ITGB1	yellow
PDIA4	yellow
ENSMFAG00000000366	yellow
ENSMFAG00000031945	yellow
CXCL6	yellow
TNS4	yellow
RPS6	yellow
TPM2	yellow
ENSMFAG00000031561	yellow
EIF3L	yellow
EGFL7	yellow
RPLP0	yellow
RGCC	yellow
RPS25	yellow
ENSMFAG00000032124	yellow
EIF3G	yellow
PCDH7	yellow
HDDC2	yellow
EGR3	yellow
PDPN	yellow
ENSMFAG00000043033	yellow
ENSMFAG00000033055	yellow
GAPDH	yellow
ENSMFAG00000036866	yellow
ENSMFAG00000032199	yellow
TIMP1	yellow
EIF3H	yellow
GPNMB	yellow
DMAC1	yellow
SGK1	yellow
ENSMFAG00000027717	yellow
PNN	yellow
ENSMFAG00000000580	yellow
FKBP11	yellow
RPS3	yellow
ENSMFAG00000036388	yellow
PDLIM1	yellow
ENSMFAG00000039785	yellow
ENSMFAG00000033495	yellow
SNAI2	yellow
ENSMFAG00000042430	yellow
RPL9	yellow
ENSMFAG00000034368	yellow
RPL8	yellow
CALR	yellow
PCDHGA4	yellow
ENSMFAG00000032800	yellow
ENSMFAG00000032415	yellow
ATIC	yellow
ENSMFAG00000044574	yellow
DEGS1	yellow
DUSP2	yellow
SERPINE1	yellow
ELL2	yellow
ENSMFAG00000007224	yellow
KRT17	yellow
RPS4X	yellow
ENSMFAG00000002566	yellow
MMP1	yellow
RPS19	yellow
ENSMFAG00000034835	yellow
ENSMFAG00000023169	yellow
TSPAN9	yellow
ENSMFAG00000037878	yellow
ENSMFAG00000016548	yellow
ENSMFAG00000043057	yellow
ENSMFAG00000042744	yellow
ENSMFAG00000000298	yellow
ENSMFAG00000028034	yellow
PLEK2	yellow
HSP90AB1	yellow
ENSMFAG00000031087	yellow
NPM3	yellow
ENSMFAG00000017384	yellow
ENSMFAG00000043579	yellow
RPS24	yellow
RPL28	yellow
SERPING1	yellow
RPL10	yellow
PPIA	yellow
ENSMFAG00000004178	yellow
RPL32	yellow
ENSMFAG00000034138	yellow
ENSMFAG00000035226	yellow
SLC25A6	yellow
RPL5	yellow
RACK1	yellow
ENSMFAG00000037250	yellow
NAP1L1	yellow
IGFBP5	yellow
RPS5	yellow
EMP3	yellow
ENSMFAG00000046092	yellow
P4HA1	yellow
KRT14	yellow
ENSMFAG00000044925	yellow
ENSMFAG00000011451	yellow
ENSMFAG00000038283	yellow
ENSMFAG00000040276	yellow
ENSMFAG00000027483	yellow
HOMER1	yellow
DCN	yellow
NT5C3B	yellow
RAB13	yellow
MANEA	yellow
ENSMFAG00000041383	yellow
ENSMFAG00000015746	yellow
NUCB2	yellow
ENSMFAG00000030186	yellow
ITGA3	yellow
ENSMFAG00000032081	yellow
RPS9	yellow
